# Supplementary material for: Insights into Bactericera cockerelli and Candidatus Liberibacter solanacearum interaction: a tissue-specific transcriptomic approach
Source: Front Plant Sci. 2024 Aug 30;15:1393994. doi: 10.3389/fpls.2024.1393994 (PMC11392735; doi:10.3389/fpls.2024.1393994)
Supplement: Supplementary file 2 [file DataSheet2.xlsx]

## Sheet: Sheet 1
Supplementary Table 4. differentially expressed genes between CLso(-) and CLso(+) conditions in the salivary glands and ovaries.
CLso(+)/CLso(-) Salivary glands												CLso(+)/CLso(-) Ovaries
			Read counts (normalized)												Read counts (normalized)
Gene ID	log2fold-change	Corrected P-value	CLso(-) Salivary glands Rep 1	CLso(-) Salivary glands Rep 2	CLso(-) Salivary glands Rep 3	CLso(+) Salivary glands Rep 1	CLso(+) Salivary glands Rep 2	CLso(+) Salivary glands Rep 3	Regulation	Annotation		Gene ID	log2fold-change	Corrected P-value	CLso(-) Ovaries Rep 1	CLso(-) Ovaries Rep 2	CLso(-) Ovaries Rep 3	CLso(+) Ovaries Rep 1	CLso(+) Ovaries Rep 2	CLso(+) Ovaries Rep 3	Regulation	Annotation
ANN00026	2.0896	0.00556697	6.88237	11.4608	7.47865	27.4222	51.8031	31.3629	up	Protein of unknown function		ANN00493	6.95877	0.000490195	0	0.821252	0	1.95348	82.5859	51.6992	up	Similar to RTase: Probable RNA-directed DNA polymerase from transposon BS (Drosophila melanogaster OX%3D7227)
ANN00179	3.03497	6.77393e-05	3.05883	6.54904	6.23221	23.7659	46.5171	57.9007	up	Similar to GVQW3: Protein GVQW3 (Homo sapiens OX%3D9606)		ANN01151	1.42768	0.0495571	30.0373	36.9564	58.4016	58.6044	156.569	123.044	up	Similar to TY3B-G: Transposon Ty3-G Gag-Pol polyprotein (Saccharomyces cerevisiae (strain ATCC 204508 / S288c) OX%3D559292)
ANN00182	4.193	9.18005e-14	11.4706	2.45589	2.49288	97.806	121.579	98.9136	up	Protein of unknown function		ANN01188	1.523	0.0295535	73.1344	60.7727	48.503	60.5579	219.369	242.986	up	Similar to rp2: Protein XRP2 (Danio rerio OX%3D7955)
ANN00183	4.40009	1.40009e-12	6.88237	0.818629	4.98577	104.205	66.604	95.2948	up	Protein of unknown function		ANN01207	2.25227	0.0354085	444.03	297.293	392.973	539.16	2854.38	2009.03	up	Protein of unknown function
ANN00217	3.45962	0.00373001	0	4.09315	2.49288	10.9689	35.945	24.1253	up	Similar to Retrovirus-related Pol polyprotein from type-1 retrotransposable element R1 (Fragment) (Bradysia coprophila OX%3D38358)		ANN01208	1.77863	3.87803e-06	535.448	203.671	381.095	865.391	1485.69	1481.7	up	Protein of unknown function
ANN00230	2.88315	0.0116079	1.52942	2.45589	4.98577	27.4222	25.373	9.65011	up	Protein of unknown function		ANN01310	1.5332	0.043624	53.5448	55.8452	14.8479	167.999	98.0708	93.0585	up	Similar to K12H4.7: Putative serine protease K12H4.7 (Caenorhabditis elegans OX%3D6239)
ANN00235	5.62646	0.0122231	0	0	0	5.48445	5.28603	14.4752	up	Protein of unknown function		ANN01318	2.21787	0.0203984	39.1791	11.4975	24.7464	21.4883	209.906	114.772	up	Similar to EIF3K: Eukaryotic translation initiation factor 3 subunit K (Homo sapiens OX%3D9606)
ANN00292	4.9365	0.00179461	0	0	2.49288	18.2815	19.0297	21.7127	up	Similar to pol: RNA-directed DNA polymerase from mobile element jockey (Drosophila melanogaster OX%3D7227)		ANN01494	2.24763	0.00127103	26.1194	18.0676	13.858	43.9533	132.482	96.1605	up	Similar to CG5065: Putative fatty acyl-CoA reductase CG5065 (Drosophila melanogaster OX%3D7227)
ANN00295	3.74364	0.0396294	1.52942	0.818629	0	7.3126	20.0869	7.23758	up	Similar to PGBD3: PiggyBac transposable element-derived protein 3 (Homo sapiens OX%3D9606)		ANN01662	1.62745	0.00714468	30.0373	31.2076	40.5842	66.4183	131.621	116.84	up	Similar to wrn: Werner syndrome ATP-dependent helicase homolog (Xenopus laevis OX%3D8355)
ANN00376	6.37115	0.00144368	0	0	0	1.82815	21.1441	19.3002	up	Protein of unknown function		ANN01864	1.81776	2.66163e-05	63.9926	62.4152	54.4422	131.86	253.78	251.258	up	Similar to PCMT1: Protein-L-isoaspartate(D-aspartate) O-methyltransferase (Homo sapiens OX%3D9606)
ANN00508	1.07151	0.02376	45.1178	71.2208	63.5685	85.0089	126.865	166.464	up	Protein of unknown function		ANN01865	1.47188	3.24989e-05	229.851	235.699	254.393	410.231	883.497	703.109	up	Similar to pcmt: Protein-L-isoaspartate(D-aspartate) O-methyltransferase (Danio rerio OX%3D7955)
ANN00533	1.27626	0.000385908	74.9414	156.358	98.4689	299.816	256.901	242.459	up	Similar to glt-1: Excitatory amino acid transporter (Caenorhabditis elegans OX%3D6239)		ANN01866	1.37208	0.00901528	79.6642	55.0239	132.641	164.092	252.919	274.006	up	Similar to pcmt: Protein-L-isoaspartate(D-aspartate) O-methyltransferase (Danio rerio OX%3D7955)
ANN00546	5.86502	0.00426076	0	0	0	9.14075	8.45765	12.0626	up	Similar to GIP: Copia protein (Drosophila melanogaster OX%3D7227)		ANN01924	3.45215	0.00736982	5.22389	3.28501	1.97971	10.7441	77.4243	23.7816	up	Similar to GVQW3: Protein GVQW3 (Homo sapiens OX%3D9606)
ANN00680	1.96681	0.039681	3.05883	6.54904	9.97153	26.5082	23.2585	24.1253	up	Similar to PGBD4: PiggyBac transposable element-derived protein 4 (Homo sapiens OX%3D9606)		ANN02056	1.02077	0.00382738	284.702	276.762	312.795	421.952	695.958	655.546	up	Similar to STOML2: Stomatin-like protein 2%2C mitochondrial (Homo sapiens OX%3D9606)
ANN00792	3.49186	0.00533937	1.52942	3.27452	0	12.797	16.9153	28.9503	up	Similar to R1A1-element\ORF2: Putative 115 kDa protein in type-1 retrotransposable element R1DM (Drosophila melanogaster OX%3D7227)		ANN02420	2.55903	0.0301031	9.1418	8.21252	7.91886	8.79066	92.9092	46.5293	up	Similar to Coq7: 5-demethoxyubiquinone hydroxylase%2C mitochondrial (Mus musculus OX%3D10090)
ANN00897	2.52757	0.00065681	7.64708	5.73041	4.98577	40.2193	38.0594	28.9503	up	Similar to asrgl1: Isoaspartyl peptidase/L-asparaginase (Xenopus laevis OX%3D8355)		ANN02483	2.23767	0.0360545	13.0597	7.39127	16.8276	13.6744	84.3065	76.5148	up	Protein of unknown function
ANN00927	2.49066	0.0441207	12.2353	0	2.49288	14.6252	26.4302	44.6318	up	Protein of unknown function		ANN02527	2.29518	0.00500478	28.7314	21.3526	24.7464	30.2789	235.714	99.2624	up	Similar to TRAPPC4: Trafficking protein particle complex subunit 4 (Pongo abelii OX%3D9601)
ANN01004	2.55468	6.8533e-09	16.8236	17.1912	14.9573	110.603	77.1761	101.326	up	Similar to Enhancer of rudimentary homolog (Aedes aegypti OX%3D7159)		ANN02772	3.41946	0.0159098	355.224	320.288	172.235	472.742	5740.58	2855.86	up	Similar to Esterase FE4 (Myzus persicae OX%3D13164)
ANN01086	1.68264	0.0012896	33.6471	18.0098	17.4502	87.7512	65.5468	71.1696	up	Protein of unknown function		ANN02818	4.79909	0.00382738	2.61194	0	1.97971	1.95348	82.5859	34.1215	up	Similar to R1A1-element\ORF2: Putative 115 kDa protein in type-1 retrotransposable element R1DM (Drosophila melanogaster OX%3D7227)
ANN01116	1.01407	0.00241483	97.8826	114.608	89.7438	237.659	171.267	202.652	up	Protein of unknown function		ANN02821	3.43579	0.0180586	2.61194	3.28501	1.97971	7.81392	55.0573	22.7476	up	Similar to jockey\pol: RNA-directed DNA polymerase from mobile element jockey (Drosophila funebris OX%3D7221)
ANN01126	1.3977	0.00142569	29.0589	48.2991	37.3932	96.8919	89.8626	115.801	up	Similar to ACOX3: Peroxisomal acyl-coenzyme A oxidase 3 (Homo sapiens OX%3D9606)		ANN03581	1.25309	0.0335142	94.0299	99.3715	76.219	103.534	280.448	258.496	up	Similar to PIK3AP1: Phosphoinositide 3-kinase adapter protein 1 (Gallus gallus OX%3D9031)
ANN01151	1.18532	0.00238278	53.5295	81.8629	63.5685	161.791	117.35	173.702	up	Similar to TY3B-G: Transposon Ty3-G Gag-Pol polyprotein (Saccharomyces cerevisiae (strain ATCC 204508 / S288c) OX%3D559292)		ANN03924	1.16161	0.0351221	53.5448	73.9127	63.3509	115.255	185.818	127.18	up	Protein of unknown function
ANN01186	1.09237	0.0132614	63.4707	49.1178	39.8861	98.7201	128.979	100.12	up	Similar to LINE-1 reverse transcriptase homolog (Nycticebus coucang OX%3D9470)		ANN03962	2.00317	0.00719789	23.5075	13.14	17.8174	91.8135	40.4327	83.7527	up	Similar to cut-1: Cuticlin-1 (Caenorhabditis elegans OX%3D6239)
ANN01190	1.27361	0.0013315	42.0589	46.6619	42.379	100.548	103.606	113.389	up	Similar to Vps16: Vacuolar protein sorting-associated protein 16 homolog (Mus musculus OX%3D10090)		ANN03974	6.30455	0.0111545	0	0	0	1.95348	19.7862	22.7476	up	Protein of unknown function
ANN01207	1.38259	0.0152854	56.5884	63.0345	129.63	92.3215	204.041	349.816	up	Protein of unknown function		ANN04254	1.60736	2.13913e-05	476.68	634.828	585.006	870.275	2358.86	1942.86	up	Similar to Serp2: Stress-associated endoplasmic reticulum protein 2 (Mus musculus OX%3D10090)
ANN01214	1.59146	1.25676e-05	1067.53	1093.69	2095.27	2418.64	4335.6	6065.09	up	Protein of unknown function		ANN04333	2.03879	0.00557108	49.6269	22.9951	19.7971	82.0461	222.81	69.2769	up	Similar to lgrD: Linear gramicidin synthase subunit D (Brevibacillus parabrevis OX%3D54914)
ANN01221	1.73728	0.00356084	15.2942	16.3726	13.7109	41.1334	48.6315	62.7257	up	Similar to X-element\ORF2: Probable RNA-directed DNA polymerase from transposon X-element (Drosophila melanogaster OX%3D7227)		ANN04357	1.1921	0.0160445	53.5448	59.9514	61.3712	122.092	148.827	129.248	up	Protein of unknown function
ANN01228	2.02513	1.38496e-10	51.2354	63.0345	84.758	238.573	233.643	330.516	up	Similar to FASN: Fatty acid synthase (Gallus gallus OX%3D9031)		ANN04450	1.07447	0.0451607	61.3807	82.9465	129.671	208.046	167.753	203.695	up	Similar to exc-4: Chloride intracellular channel exc-4 (Caenorhabditis elegans OX%3D6239)
ANN01238	2.81825	0.0177091	1.52942	1.63726	4.98577	20.1096	19.0297	14.4752	up	Protein of unknown function		ANN04750	8.20944	1.52638e-06	0	0	0	9.7674	94.6297	62.039	up	Similar to CFDP2: Craniofacial development protein 2 (Bos taurus OX%3D9913)
ANN01286	2.46868	0.00141031	3.82354	8.18629	12.4644	46.6178	62.3752	21.7127	up	Similar to Transposon TX1 uncharacterized 149 kDa protein (Xenopus laevis OX%3D8355)		ANN04809	3.54689	0.00736982	5.22389	1.6425	1.97971	10.7441	58.4984	28.9515	up	Similar to Trypsin-1 (Astacus astacus OX%3D6715)
ANN01306	3.44325	0.0314836	1.52942	1.63726	0	14.6252	8.45765	14.4752	up	Similar to K02A2.6: Uncharacterized protein K02A2.6 (Caenorhabditis elegans OX%3D6239)		ANN04869	1.56401	0.0498791	27.4254	22.1738	16.8276	54.6974	49.8957	90.9906	up	Protein of unknown function
ANN01318	3.83517	4.10783e-07	3.05883	6.54904	0	46.6178	56.0319	45.838	up	Similar to EIF3K: Eukaryotic translation initiation factor 3 subunit K (Homo sapiens OX%3D9606)		ANN05138	3.80066	8.2327e-07	10.4478	9.85503	3.95943	28.3255	117.857	190.253	up	Similar to resilin: Pro-resilin (Drosophila melanogaster OX%3D7227)
ANN01319	4.46413	0.00222623	0	0	3.73932	22.8519	34.8878	8.44385	up	Similar to CPIJ017839: Eukaryotic translation initiation factor 3 subunit K (Culex quinquefasciatus OX%3D7176)		ANN05240	2.16034	0.0456448	1443.1	689.852	494.929	1545.2	5682.94	4515.41	up	Similar to emsy: BRCA2-interacting transcriptional repressor EMSY (Danio rerio OX%3D7955)
ANN01320	2.7811	0.00378279	2.29412	6.54904	2.49288	20.1096	22.2013	37.3942	up	Similar to eif3k: Eukaryotic translation initiation factor 3 subunit K (Xenopus tropicalis OX%3D8364)		ANN05588	5.43252	0.0125017	0	1.6425	0	1.95348	55.0573	24.8156	up	Protein of unknown function
ANN01321	1.31714	0.0272529	26.7648	29.4707	14.9573	46.6178	68.7184	65.1382	up	Similar to Casein kinase II subunit alpha (Spodoptera frugiperda OX%3D7108)		ANN05781	2.06008	0.00495395	26.1194	50.0964	60.3813	55.6742	344.968	171.641	up	Similar to Ack-like: Activated Cdc42 kinase-like (Drosophila melanogaster OX%3D7227)
ANN01328	1.06702	0.00601133	60.4119	58.9413	61.0756	111.517	116.293	150.783	up	Similar to TRAPPC8: Trafficking protein particle complex subunit 8 (Homo sapiens OX%3D9606)		ANN06243	2.44943	0.0181378	20.8955	16.425	17.8174	9.7674	197.002	93.0585	up	Similar to pol: Retrovirus-related Pol polyprotein from transposon 17.6 (Drosophila melanogaster OX%3D7227)
ANN01330	7.04622	3.0143e-05	0	0	0	9.14075	31.7162	26.5378	up	Similar to pif1: ATP-dependent DNA helicase PIF1 (Xenopus laevis OX%3D8355)		ANN06439	2.8144	0.00016023	16.9776	18.0676	25.7363	28.3255	227.111	172.675	up	Similar to Dynein beta chain%2C ciliary (Tripneustes gratilla OX%3D7673)
ANN01352	1.05132	0.0464693	46.6472	33.5638	38.6397	60.3289	103.606	83.2322	up	Similar to Kifbp: KIF-binding protein (Gallus gallus OX%3D9031)		ANN06488	1.85715	0.0301031	23.5075	18.0676	18.8073	29.3022	113.556	74.4468	up	Similar to Rpp40: Ribonuclease P protein subunit p40 (Rattus norvegicus OX%3D10116)
ANN01360	2.16318	4.81113e-05	9.17649	18.8285	26.1753	65.8134	96.2058	74.7883	up	Similar to CPM: Carboxypeptidase M (Pongo abelii OX%3D9601)		ANN06843	1.39453	0.000490195	92.724	73.9127	126.702	216.836	270.985	282.278	up	Similar to qtrt1: Queuine tRNA-ribosyltransferase catalytic subunit 1 (Xenopus tropicalis OX%3D8364)
ANN01557	1.05033	0.000955563	282.942	226.76	356.482	568.554	773.875	446.318	up	Similar to Cyp6a2: Cytochrome P450 6a2 (Drosophila melanogaster OX%3D7227)		ANN06868	1.0495	0.00846287	147.575	184.782	182.134	264.696	357.012	445.647	up	Protein of unknown function
ANN01596	2.05302	1.62357e-12	72.6472	91.6865	114.673	431.443	426.054	290.71	up	Similar to Endoglucanase-1 (Aspergillus aculeatus OX%3D5053)		ANN06953	4.04472	0.0263409	0	0	3.95943	10.7441	26.6684	28.9515	up	Similar to Tf2-8: Transposon Tf2-8 polyprotein (Schizosaccharomyces pombe (strain 972 / ATCC 24843) OX%3D284812)
ANN01605	5.029	0.00122115	0	0	2.49288	20.1096	23.2585	19.3002	up	Similar to PIF1: ATP-dependent DNA helicase PIF1 (Candida albicans (strain SC5314 / ATCC MYA-2876) OX%3D237561)		ANN07013	1.70913	0.029077	39.1791	28.7438	17.8174	50.7905	150.547	76.5148	up	Protein of unknown function
ANN01650	1.8328	1.95881e-05	29.8236	60.5786	52.3505	144.424	121.579	241.253	up	Similar to LRRFIP2: Leucine-rich repeat flightless-interacting protein 2 (Bos taurus OX%3D9913)		ANN07058	2.49919	0.00251294	15.6717	22.9951	41.574	25.3952	229.692	200.593	up	Protein of unknown function
ANN01662	2.12093	0.000326397	12.2353	9.82355	13.7109	44.7897	61.318	48.2505	up	Similar to wrn: Werner syndrome ATP-dependent helicase homolog (Xenopus laevis OX%3D8355)		ANN07319	2.67598	0.00850127	13.0597	13.14	3.95943	14.6511	99.7913	77.5488	up	Similar to Transposon TX1 uncharacterized 149 kDa protein (Xenopus laevis OX%3D8355)
ANN01754	1.09265	0.00834819	159.824	517.374	337.786	704.752	722.072	737.027	up	Similar to nhl-1: RING finger protein nhl-1 (Caenorhabditis elegans OX%3D6239)		ANN07709	4.88407	0.0295023	2.61194	0	0	3.90696	15.4849	45.4953	up	Similar to RTase: Probable RNA-directed DNA polymerase from transposon BS (Drosophila melanogaster OX%3D7227)
ANN01817	1.44624	0.00337206	21.4118	56.4854	63.5685	138.025	106.778	136.308	up	Similar to agk: Acylglycerol kinase%2C mitochondrial (Danio rerio OX%3D7955)		ANN08355	2.0371	0.047044	7.83583	26.2801	19.7971	18.5581	90.3284	115.806	up	Similar to LINE-1 reverse transcriptase homolog (Nycticebus coucang OX%3D9470)
ANN01820	1.46998	0.00241483	26.7648	39.2942	24.9288	95.0638	64.4896	94.0886	up	Similar to vir: Protein virilizer (Drosophila melanogaster OX%3D7227)		ANN08358	2.03443	9.05612e-07	95.3359	173.284	73.2494	302.789	500.677	603.847	up	Similar to DNApol-epsilon255: DNA polymerase epsilon catalytic subunit 1 (Drosophila melanogaster OX%3D7227)
ANN01830	2.94145	0.00944765	3.82354	4.09315	0	23.7659	12.6865	28.9503	up	Similar to ZBED9: SCAN domain-containing protein 3 (Homo sapiens OX%3D9606)		ANN08448	1.03372	0.0447	245.523	213.526	299.927	402.417	814.676	335.011	up	Similar to AKR1B10: Aldo-keto reductase family 1 member B10 (Homo sapiens OX%3D9606)
ANN01837	4.0835	0.00118181	0.764708	0	3.73932	23.7659	22.2013	19.3002	up	Protein of unknown function		ANN08896	2.56531	0.0126407	9.1418	12.3188	3.95943	18.5581	80.8654	51.6992	up	Similar to dpn: Protein deadpan (Drosophila melanogaster OX%3D7227)
ANN01883	1.08889	0.000497855	115.471	117.883	118.412	216.636	311.876	219.54	up	Protein of unknown function		ANN09177	2.17493	0.00278844	28.7314	45.9901	57.4117	42.9766	277.007	279.176	up	Similar to B52: Serine-arginine protein 55 (Drosophila melanogaster OX%3D7227)
ANN01924	2.6001	0.0334947	5.35295	1.63726	2.49288	7.3126	27.4874	24.1253	up	Similar to GVQW3: Protein GVQW3 (Homo sapiens OX%3D9606)		ANN09355	1.34568	0.008421	71.8284	76.3765	61.3712	109.395	202.163	221.273	up	Similar to Xirp2: Xin actin-binding repeat-containing protein 2 (Mus musculus OX%3D10090)
ANN01939	1.14769	0.00337399	94.8238	58.1227	84.758	223.948	148.009	153.195	up	Similar to HSDL1: Hydroxysteroid dehydrogenase-like protein 1 (Gallus gallus OX%3D9031)		ANN09442	2.57405	5.14982e-17	336.941	206.956	143.529	1286.37	1167.39	1623.35	up	Similar to CNDP2: Cytosolic non-specific dipeptidase (Bos taurus OX%3D9913)
ANN01940	1.43845	0.0448252	21.4118	18.8285	8.72509	34.7348	43.3455	57.9007	up	Similar to LAC: Lachesin (Schistocerca americana OX%3D7009)		ANN09495	1.15655	0.00125012	193.284	130.579	192.032	327.208	392.283	427.035	up	Protein of unknown function
ANN01987	3.33666	6.75408e-17	26.7648	26.1961	9.97153	254.113	254.787	144.752	up	Similar to nas-4: Zinc metalloproteinase nas-4 (Caenorhabditis elegans OX%3D6239)		ANN09501	4.73271	0.045212	0	0	1.97971	3.90696	20.6465	28.9515	up	Protein of unknown function
ANN01988	1.17425	8.48399e-11	1849.83	2237.31	2071.59	4623.39	4824.03	4449.91	up	Similar to Esterase FE4 (Myzus persicae OX%3D13164)		ANN09558	4.04889	0.0192438	7.83583	9.03378	10.8884	10.7441	268.404	180.947	up	Similar to PGLS: 6-phosphogluconolactonase (Homo sapiens OX%3D9606)
ANN01999	4.76348	1.71308e-05	0.764708	2.45589	2.49288	47.5319	5.28603	97.7074	up	Similar to Piezo: Piezo-type mechanosensitive ion channel component (Drosophila melanogaster OX%3D7227)		ANN09567	4.83759	2.08825e-11	2.61194	5.74877	1.97971	62.5113	135.062	110.636	up	Similar to R1A1-element\ORF2: Putative 115 kDa protein in type-1 retrotransposable element R1DM (Drosophila melanogaster OX%3D7227)
ANN02012	1.48607	6.11942e-07	72.6472	79.4071	73.54	235.831	185.011	211.096	up	Similar to bloc1s1: Biogenesis of lysosome-related organelles complex 1 subunit 1 (Xenopus tropicalis OX%3D8364)		ANN09602	2.59458	4.52111e-28	237.687	162.608	191.042	1053.9	1295.57	1206.66	up	Similar to PMPCB: Mitochondrial-processing peptidase subunit beta (Bos taurus OX%3D9913)
ANN02014	1.66018	9.05037e-06	107.059	92.5051	78.5258	366.544	160.695	354.642	up	Similar to Cht10: Probable chitinase 10 (Drosophila melanogaster OX%3D7227)		ANN09728	2.14667	1.34443e-07	70.5224	59.9514	48.503	161.162	307.977	320.535	up	Similar to MRPS2: 28S ribosomal protein S2%2C mitochondrial (Homo sapiens OX%3D9606)
ANN02035	2.32284	1.65807e-14	45.1178	68.7649	71.0472	247.714	360.507	311.216	up	Similar to Samhd1: Deoxynucleoside triphosphate triphosphohydrolase SAMHD1 (Mus musculus OX%3D10090)		ANN09746	3.76781	0.0229333	36.5672	8.21252	36.6247	55.6742	682.194	367.064	up	Similar to pol: RNA-directed DNA polymerase from mobile element jockey (Drosophila melanogaster OX%3D7227)
ANN02056	1.27558	0.00131644	76.4708	95.7796	56.0899	162.705	143.78	250.903	up	Similar to STOML2: Stomatin-like protein 2%2C mitochondrial (Homo sapiens OX%3D9606)		ANN09785	3.77059	5.47452e-05	2.61194	8.21252	7.91886	17.5813	65.3805	179.913	up	Protein of unknown function
ANN02062	2.01015	0.0249044	9.17649	4.91178	4.98577	23.7659	24.3158	30.1566	up	Similar to Dynein intermediate chain 2%2C ciliary (Heliocidaris crassispina OX%3D1043166)		ANN09968	4.45772	0.0193338	0	0	3.95943	1.95348	54.197	32.0535	up	Similar to Scai: Protein SCAI (Mus musculus OX%3D10090)
ANN02087	5.61233	0.0194486	0	0	0	3.6563	2.11441	19.3002	up	Similar to X-element\ORF2: Probable RNA-directed DNA polymerase from transposon X-element (Drosophila melanogaster OX%3D7227)		ANN10258	2.80001	0.026994	10.4478	1.6425	3.95943	16.6046	58.4984	31.0195	up	Similar to AnxB10: Annexin B10 (Drosophila melanogaster OX%3D7227)
ANN02103	1.03815	0.00489826	71.1178	103.147	90.9902	153.565	167.039	224.365	up	Similar to trmt10c: Mitochondrial ribonuclease P protein 1 homolog (Drosophila melanogaster OX%3D7227)		ANN10280	1.16159	0.00962034	78.3583	134.685	127.692	206.092	309.697	250.224	up	Similar to Vinc: Vinculin (Drosophila melanogaster OX%3D7227)
ANN02200	1.68989	0.0240796	13	9.82355	12.4644	36.563	24.3158	53.0756	up	Similar to Npr1: Atrial natriuretic peptide receptor 1 (Mus musculus OX%3D10090)		ANN10334	1.488	0.0370401	57.4627	28.7438	25.7363	72.2787	145.386	92.0246	up	Similar to AASS: Alpha-aminoadipic semialdehyde synthase%2C mitochondrial (Bos taurus OX%3D9913)
ANN02221	1.48187	3.06467e-06	107.824	135.892	76.0329	361.06	271.702	265.378	up	Similar to T-complex protein 1 subunit delta (Ochlerotatus triseriatus OX%3D7162)		ANN10996	2.47951	0.00201515	13.0597	11.4975	13.858	27.3487	107.534	78.5828	up	Protein of unknown function
ANN02223	1.42291	3.10739e-12	1261	1210.75	1467.06	3436.92	4118.88	2998.77	up	Protein of unknown function		ANN11816	5.13887	0.0360545	0	1.6425	0	1.95348	55.9176	8.27187	up	Similar to CPN1: Carboxypeptidase N catalytic chain (Bos taurus OX%3D9913)
ANN02227	1.27696	0.000680226	74.1766	50.755	51.1041	145.338	125.808	158.021	up	Similar to glceb: D-glucuronyl C5-epimerase B (Danio rerio OX%3D7955)		ANN11863	2.997	0.00558592	6.52986	3.28501	7.91886	89.8601	18.9259	31.0195	up	Similar to X-element\ORF2: Probable RNA-directed DNA polymerase from transposon X-element (Drosophila melanogaster OX%3D7227)
ANN02229	1.9489	0.0230966	7.64708	6.54904	9.97153	18.2815	28.5446	45.838	up	Similar to pusl1: tRNA pseudouridine synthase-like 1 (Xenopus laevis OX%3D8355)		ANN11953	4.68565	0.0402961	2.61194	1.6425	7.91886	3.90696	188.399	120.976	up	Protein of unknown function
ANN02230	2.04546	0.036408	4.58825	7.36766	6.23221	16.4533	19.0297	39.8067	up	Similar to mst: Protein misato (Drosophila melanogaster OX%3D7227)		ANN11967	1.56735	0.00338835	180.224	275.12	265.282	258.836	1103.73	775.488	up	Similar to Sam-S: S-adenosylmethionine synthase (Drosophila melanogaster OX%3D7227)
ANN02290	5.16064	0.000948429	0	0	2.49288	29.2504	28.5446	10.8564	up	Protein of unknown function		ANN12110	1.01961	0.0459896	74.4404	106.763	71.2697	145.534	187.539	180.947	up	Similar to ADSL: Adenylosuccinate lyase (Bos taurus OX%3D9913)
ANN02291	7.98354	7.00698e-08	0	0	0	49.36	47.5743	31.3629	up	Protein of unknown function		ANN12621	1.45917	0.0192438	31.3433	60.7727	44.5436	82.0461	174.635	122.01	up	Similar to wat: Fatty acyl-CoA reductase wat (Drosophila melanogaster OX%3D7227)
ANN02330	1.44153	0.000215323	34.4118	49.9364	43.6255	117.916	113.121	115.801	up	Similar to Probable peptide chain release factor C12orf65 homolog%2C mitochondrial (Mus musculus OX%3D10090)		ANN12778	3.02299	0.000169111	11.7537	4.92751	17.8174	29.3022	139.364	108.568	up	Similar to smu1: WD40 repeat-containing protein SMU1 (Xenopus laevis OX%3D8355)
ANN02413	2.49868	0.0111072	4.58825	3.27452	3.73932	21.9378	22.2013	21.7127	up	Similar to CPE: Carboxypeptidase E (Bos taurus OX%3D9913)		ANN13174	3.25414	0.000291063	2.61194	4.92751	6.929	60.5579	47.3149	33.0875	up	Protein of unknown function
ANN02420	2.73277	1.88568e-06	16.0589	13.9167	2.49288	80.4386	62.3752	83.2322	up	Similar to Coq7: 5-demethoxyubiquinone hydroxylase%2C mitochondrial (Mus musculus OX%3D10090)		ANN13306	1.02935	0.0412902	65.2986	75.5552	66.3204	132.837	141.084	149.928	up	Protein of unknown function
ANN02483	4.28288	1.00064e-13	3.82354	5.73041	3.73932	85.923	76.1189	100.12	up	Protein of unknown function		ANN13793	1.46448	0.0346977	67.9105	76.3765	45.5334	68.3718	195.281	260.564	up	Similar to COPE: Coatomer subunit epsilon (Pongo abelii OX%3D9601)
ANN02512	5.55462	0.000695727	1.52942	0	0	5.48445	52.8603	24.1253	up	Similar to RTase: Probable RNA-directed DNA polymerase from transposon BS (Drosophila melanogaster OX%3D7227)		ANN13846	1.76046	0.00558592	22.2015	68.164	44.5436	84.9764	198.722	178.879	up	Similar to CUBN: Cubilin (Sus scrofa OX%3D9823)
ANN02527	2.4852	1.18567e-07	13.7647	31.9265	12.4644	101.462	128.979	100.12	up	Similar to TRAPPC4: Trafficking protein particle complex subunit 4 (Pongo abelii OX%3D9601)		ANN13895	1.96465	0.0276234	10.4478	18.0676	11.8783	60.5579	30.1095	69.2769	up	Similar to TTPAL: Alpha-tocopherol transfer protein-like (Pongo abelii OX%3D9601)
ANN02565	1.45526	0.0151664	19.8824	15.554	26.1753	53.9304	43.3455	69.9633	up	Similar to lig: Protein lingerer (Aedes aegypti OX%3D7159)		ANN14085	3.61683	0.00752324	5.22389	4.10626	2.96957	1.95348	94.6297	52.7332	up	Similar to BUD23: Probable 18S rRNA (guanine-N(7))-methyltransferase (Homo sapiens OX%3D9606)
ANN02665	2.48712	0.0444759	0	4.09315	7.47865	18.2815	23.2585	19.3002	up	Similar to SYNE1: Nesprin-1 (Homo sapiens OX%3D9606)		ANN14240	3.42892	0.0410901	0	4.92751	1.97971	7.81392	55.0573	16.5437	up	Similar to X-element\ORF2: Probable RNA-directed DNA polymerase from transposon X-element (Drosophila melanogaster OX%3D7227)
ANN02673	4.22291	1.35872e-13	5.35295	4.91178	7.47865	115.173	150.123	57.9007	up	Similar to RTase: Probable RNA-directed DNA polymerase from transposon BS (Drosophila melanogaster OX%3D7227)		ANN14501	5.32638	0.020663	0	1.6425	0	1.95348	12.0438	62.039	up	Similar to svr: Carboxypeptidase D (Drosophila melanogaster OX%3D7227)
ANN02685	2.8407	0.0286514	1.52942	1.63726	3.73932	19.1956	17.9725	9.65011	up	Similar to Pol: LINE-1 retrotransposable element ORF2 protein (Mus musculus OX%3D10090)		ANN14573	2.29227	0.012731	13.0597	20.5313	11.8783	18.5581	107.534	98.2285	up	Similar to Cyclic nucleotide-gated channel cone photoreceptor subunit alpha (Gallus gallus OX%3D9031)
ANN02734	1.41255	0.00109806	31.353	31.1079	43.6255	99.6341	85.6337	94.0886	up	Similar to Capn7: Calpain-7 (Mus musculus OX%3D10090)		ANN14760	2.72211	0.00719789	5.22389	4.10626	15.8377	21.4883	55.0573	89.9566	up	Similar to pol: RNA-directed DNA polymerase from mobile element jockey (Drosophila melanogaster OX%3D7227)
ANN02740	1.9763	0.0143092	9.17649	11.4608	13.7109	65.8134	14.8009	53.0756	up	Similar to RTase: Probable RNA-directed DNA polymerase from transposon BS (Drosophila melanogaster OX%3D7227)		ANN14821	2.09056	0.00269907	50.9329	39.4201	50.4827	45.9068	264.103	288.481	up	Similar to skp1: S-phase kinase-associated protein 1 (Xenopus laevis OX%3D8355)
ANN02772	2.66188	8.39152e-14	58.8825	149.809	219.374	903.106	917.655	867.304	up	Similar to Esterase FE4 (Myzus persicae OX%3D13164)		ANN15367	1.62537	0.0391945	20.8955	26.2801	29.6957	42.9766	71.4024	124.078	up	Similar to TY3B-G: Transposon Ty3-G Gag-Pol polyprotein (Saccharomyces cerevisiae (strain ATCC 204508 / S288c) OX%3D559292)
ANN02779	2.40749	0.000554803	15.2942	3.27452	12.4644	46.6178	40.1738	77.2009	up	Similar to svr: Carboxypeptidase D (Drosophila melanogaster OX%3D7227)		ANN16472	3.50663	0.0380212	6.52986	0.821252	0	11.7209	18.9259	45.4953	up	Similar to Ccdc65: Dynein regulatory complex subunit 2 (Mus musculus OX%3D10090)
ANN02782	4.33076	0.0250307	1.52942	0	0	9.14075	12.6865	13.2689	up	Similar to F52C9.6: Putative uncharacterized transposon-derived protein F52C9.6 (Caenorhabditis elegans OX%3D6239)		ANN16487	1.25668	4.90605e-05	4499.07	7800.26	4851.29	10702.1	16073.3	14212.1	up	Similar to Vg: Vitellogenin (Apis mellifera OX%3D7460)
ANN02805	5.10693	2.81115e-06	0	3.27452	0	57.5867	31.7162	32.5691	up	Protein of unknown function		ANN16519	2.14185	0.0243511	15.6717	24.6376	11.8783	21.4883	137.643	72.3789	up	Similar to HARBI1: Putative nuclease HARBI1 (Homo sapiens OX%3D9606)
ANN02818	5.426	0.000351981	1.52942	0	0	30.1645	28.5446	16.8877	up	Similar to R1A1-element\ORF2: Putative 115 kDa protein in type-1 retrotransposable element R1DM (Drosophila melanogaster OX%3D7227)		ANN16647	2.76534	0.0418009	1.30597	11.4975	1.97971	49.8137	14.6246	41.3594	up	Protein of unknown function
ANN02821	3.76411	0.000412456	3.82354	0	2.49288	16.4533	29.6018	39.8067	up	Similar to jockey\pol: RNA-directed DNA polymerase from mobile element jockey (Drosophila funebris OX%3D7221)		ANN16938	11.8138	0.00141389	0	0	0	5.86044	1083.08	937.823	up	Similar to Retrovirus-related Pol polyprotein from transposon TNT 1-94 (Nicotiana tabacum OX%3D4097)
ANN02835	7.3071	4.63147e-06	0	0	0	38.3911	20.0869	21.7127	up	Similar to CFDP2: Craniofacial development protein 2 (Bos taurus OX%3D9913)		ANN17250	1.21578	0.043624	75.7463	55.8452	45.5334	89.8601	160.01	159.234	up	Similar to MELTF: Melanotransferrin (Homo sapiens OX%3D9606)
ANN02837	5.88944	0.000872319	0.764708	0	0	12.797	14.8009	31.3629	up	Similar to SETMAR: Histone-lysine N-methyltransferase SETMAR (Homo sapiens OX%3D9606)		ANN17265	1.22437	0.00704806	493.657	201.207	386.044	571.393	1006.52	940.925	up	Similar to NOP56: Nucleolar protein 56 (Homo sapiens OX%3D9606)
ANN02911	7.71979	6.82334e-07	0	0	0	32.9067	57.0892	16.8877	up	Similar to RTase: Probable RNA-directed DNA polymerase from transposon BS (Drosophila melanogaster OX%3D7227)		ANN17451	1.04211	0.0132838	509.329	296.472	546.401	763.811	760.479	1257.32	up	Similar to to: Protein takeout (Drosophila melanogaster OX%3D7227)
ANN02921	5.488	2.25889e-06	1.52942	0.818629	0	37.4771	35.945	45.838	up	Similar to pol: RNA-directed DNA polymerase from mobile element jockey (Drosophila melanogaster OX%3D7227)		ANN17453	3.36398	0.00790116	5.22389	1.6425	1.97971	28.3255	18.9259	39.2914	up	Similar to LINE-1 reverse transcriptase homolog (Nycticebus coucang OX%3D9470)
ANN02932	1.90177	0.0233781	6.11766	14.7353	4.98577	35.6489	25.373	37.3942	up	Similar to Tl: Protein toll (Drosophila melanogaster OX%3D7227)		ANN17625	1.28054	0.00644499	79.6642	120.724	73.2494	273.487	165.172	229.544	up	Protein of unknown function
ANN02935	2.99958	0.000325951	3.05883	2.45589	7.47865	31.9926	37.0022	28.9503	up	Similar to pol: RNA-directed DNA polymerase from mobile element jockey (Drosophila melanogaster OX%3D7227)		ANN17626	1.81715	0.00115649	24.8135	38.5989	31.6754	76.1857	122.158	139.588	up	Protein of unknown function
ANN02951	6.77867	9.64715e-05	0	0	0	16.4533	10.5721	28.9503	up	Similar to Retrovirus-related Pol polyprotein from type-1 retrotransposable element R2 (Fragment) (Nasonia vitripennis OX%3D7425)		ANN17656	1.44835	0.00269907	50.9329	90.3378	83.148	144.557	265.823	205.763	up	Protein of unknown function
ANN02971	1.65608	0.0214904	9.17649	13.0981	17.4502	43.8756	27.4874	51.8693	up	Protein of unknown function		ANN17773	1.33724	0.0410901	53.5448	37.7776	36.6247	67.395	136.783	116.84	up	Similar to Det1: DET1 homolog (Mus musculus OX%3D10090)
ANN03123	1.20617	0.0314836	45.1178	43.3874	110.933	201.096	161.753	90.4698	up	Protein of unknown function		ANN18008	1.30613	0.000127643	323.881	284.975	316.754	541.114	1045.23	700.007	up	Protein of unknown function
ANN03125	2.26316	0.00843678	6.11766	6.54904	4.98577	18.2815	33.8306	33.7754	up	Similar to pol: RNA-directed DNA polymerase from mobile element jockey (Drosophila melanogaster OX%3D7227)		ANN18349	6.99745	0.00193871	0	0	0	3.90696	5.16162	63.073	up	Similar to F52C9.6: Putative uncharacterized transposon-derived protein F52C9.6 (Caenorhabditis elegans OX%3D6239)
ANN03169	1.77314	2.97757e-06	42.8236	66.309	47.3648	237.659	131.094	166.464	up	Similar to RpII18: DNA-directed RNA polymerases I%2C II%2C and III subunit RPABC2 (Drosophila melanogaster OX%3D7227)		ANN18712	6.28032	0.0072614	0	0	0	6.83718	22.367	14.4758	up	Similar to TY3B-G: Transposon Ty3-G Gag-Pol polyprotein (Saccharomyces cerevisiae (strain ATCC 204508 / S288c) OX%3D559292)
ANN03228	3.08589	0.00239156	8.41178	1.63726	2.49288	71.2978	12.6865	25.3315	up	Protein of unknown function		ANN19079	1.7432	0.047288	14.3657	23.8163	17.8174	32.2324	94.6297	62.039	up	Similar to Wdr5: WD repeat-containing protein 5 (Rattus norvegicus OX%3D10116)
ANN03238	3.1883	0.0152605	2.29412	0.818629	2.49288	20.1096	21.1441	8.44385	up	Protein of unknown function		ANN19104	6.24727	0.0132838	0	0	0	1.95348	18.0657	22.7476	up	Protein of unknown function
ANN03491	1.01195	0.0075349	144.53	110.515	110.933	231.261	334.077	173.702	up	Protein of unknown function		ANN19217	1.85428	0.0305992	13.0597	17.2463	18.8073	41.0231	93.7694	43.4273	up	Similar to air-2: Aurora/IPL1-related protein kinase 2 (Caenorhabditis elegans OX%3D6239)
ANN03547	2.19452	0.014765	9.17649	5.73041	2.49288	31.9926	26.4302	24.1253	up	Similar to jockey\pol: RNA-directed DNA polymerase from mobile element jockey (Drosophila funebris OX%3D7221)		ANN19594	2.90524	0.03354	3.91791	5.74877	4.94929	4.8837	44.734	61.005	up	Similar to XKR4: XK-related protein 4 (Homo sapiens OX%3D9606)
ANN03677	1.42792	0.0259986	24.4706	16.3726	23.6824	82.2667	54.9747	34.9816	up	Similar to SDR-1: Farnesol dehydrogenase (Aedes aegypti OX%3D7159)		ANN19595	5.32688	0.00526622	1.30597	1.6425	5.93914	8.79066	200.443	149.928	up	Similar to Lsm6: U6 snRNA-associated Sm-like protein LSm6 (Mus musculus OX%3D10090)
ANN03727	1.17979	0.000497777	149.883	91.6865	92.2367	265.996	217.785	276.234	up	Similar to NPC1: NPC intracellular cholesterol transporter 1 (Sus scrofa OX%3D9823)		ANN19612	4.22696	5.777e-07	10.4478	4.10626	1.97971	25.3952	161.731	108.568	up	Similar to CTSL: Cathepsin L1 (Homo sapiens OX%3D9606)
ANN03789	1.03022	0.0122189	50.4707	73.6766	63.5685	121.572	150.123	110.976	up	Similar to Retrovirus-related Pol polyprotein from type-1 retrotransposable element R2 (Fragment) (Nasonia vitripennis OX%3D7425)		ANN19613	2.31217	0.0133925	9.1418	3.28501	19.7971	54.6974	53.3367	50.6652	up	Similar to CTSL: Cathepsin L1 (Fragments) (Gallus gallus OX%3D9031)
ANN03835	1.19003	8.58111e-09	328.824	308.623	353.989	781.534	737.93	739.44	up	Similar to RpL38: 60S ribosomal protein L38 (Maconellicoccus hirsutus OX%3D177089)		ANN19620	2.47648	0.0169956	7.83583	8.21252	5.93914	18.5581	60.2189	43.4273	up	Similar to DPP6: Dipeptidyl aminopeptidase-like protein 6 (Homo sapiens OX%3D9606)
ANN03923	5.75319	0.00698906	0	0	0	12.797	8.45765	6.03132	up	Similar to Slc28a3: Solute carrier family 28 member 3 (Rattus norvegicus OX%3D10116)		ANN19817	1.86933	0.00504279	92.724	52.5602	59.3914	92.7903	469.707	180.947	up	Similar to uhrf1: E3 ubiquitin-protein ligase UHRF1 (Xenopus laevis OX%3D8355)
ANN03924	1.32516	0.000218376	56.5884	76.1325	49.8577	166.362	142.723	150.783	up	Protein of unknown function		ANN19820	1.00914	0.0322252	137.127	133.864	178.174	274.464	408.628	220.239	up	Similar to uhrf1: E3 ubiquitin-protein ligase UHRF1 (Xenopus laevis OX%3D8355)
ANN03941	3.52086	0.000566132	4.58825	0	3.73932	39.3052	14.8009	39.8067	up	Similar to scrib: Protein lap4 (Drosophila melanogaster OX%3D7227)		ANN00377	-2.48	0.00980909	23.5075	42.7051	73.2494	9.7674	5.16162	10.3398	down	Similar to Pol: LINE-1 retrotransposable element ORF2 protein (Mus musculus OX%3D10090)
ANN03972	1.47923	0.000189557	49.706	47.4805	29.9146	117.002	115.236	126.658	up	Similar to MLH1: DNA mismatch repair protein MLH1 (Arabidopsis thaliana OX%3D3702)		ANN00914	-1.42543	0.000526344	291.232	446.761	442.466	199.255	94.6297	146.826	down	Similar to Nep1: Neprilysin-1 (Drosophila melanogaster OX%3D7227)
ANN03994	3.00792	0.00343049	3.05883	1.63726	4.98577	39.3052	15.8581	19.3002	up	Similar to Retrovirus-related Pol polyprotein from transposon TNT 1-94 (Nicotiana tabacum OX%3D4097)		ANN01132	-2.07269	0.000526344	481.903	312.897	190.053	143.581	60.2189	29.9855	down	Similar to UGT2B18: UDP-glucuronosyltransferase 2B18 (Macaca fascicularis OX%3D9541)
ANN04049	1.31545	0.0220582	29.8236	29.4707	18.6966	85.0089	62.3752	48.2505	up	Similar to Ift140: Intraflagellar transport protein 140 homolog (Mus musculus OX%3D10090)		ANN01364	-5.46866	0.0351221	23.5075	2.46376	19.7971	0	0.86027	0	down	Protein of unknown function
ANN04081	5.24678	0.0351467	0	0	0	3.6563	8.45765	7.23758	up	Similar to RTase: Probable RNA-directed DNA polymerase from transposon BS (Drosophila melanogaster OX%3D7227)		ANN01445	-1.05585	0.0193338	218.097	283.332	193.022	124.046	86.8873	124.078	down	Similar to wrn: Werner syndrome ATP-dependent helicase homolog (Xenopus laevis OX%3D8355)
ANN04123	1.6291	5.89247e-05	27.5295	40.9315	42.379	100.548	109.949	130.276	up	Similar to Tfam: Transcription factor A%2C mitochondrial (Rattus norvegicus OX%3D10116)		ANN01742	-1.06703	0.00850127	455.784	256.231	380.105	159.209	196.142	164.403	down	Similar to FDPS: Farnesyl pyrophosphate synthase (Bos taurus OX%3D9913)
ANN04150	1.63554	2.1104e-05	76.4708	99.8728	169.516	500.913	288.617	275.028	up	Protein of unknown function		ANN01747	-1.0953	0.00597446	428.359	358.887	401.882	231.487	123.879	201.627	down	Similar to ATG5: Autophagy protein 5 (Homo sapiens OX%3D9606)
ANN04180	1.91866	8.58322e-05	33.6471	24.5589	17.4502	64.8993	126.865	98.9136	up	Similar to pol: RNA-directed DNA polymerase from mobile element jockey (Drosophila melanogaster OX%3D7227)		ANN01782	-3.11113	3.57301e-07	138.433	54.2027	158.377	15.6278	8.6027	16.5437	down	Protein of unknown function
ANN04230	1.30057	0.00023843	110.883	72.0394	67.3078	171.846	210.384	238.84	up	Protein of unknown function		ANN01838	-1.77493	4.6667e-07	360.448	284.153	214.799	82.0461	80.8654	87.8886	down	Protein of unknown function
ANN04253	1.3772	0.000373904	85.6473	44.206	62.3221	149.908	154.352	196.621	up	Similar to MTPAP: Poly(A) RNA polymerase%2C mitochondrial (Drosophila melanogaster OX%3D7227)		ANN01842	-1.36678	0.00187983	212.873	233.236	197.971	106.465	55.0573	88.9226	down	Similar to PCMT1: Protein-L-isoaspartate(D-aspartate) O-methyltransferase (Homo sapiens OX%3D9606)
ANN04254	1.65399	3.36306e-12	296.707	191.559	281.696	765.995	842.594	811.815	up	Similar to Serp2: Stress-associated endoplasmic reticulum protein 2 (Mus musculus OX%3D10090)		ANN01851	-1.45646	0.000306616	197.202	206.134	209.85	79.1159	55.0573	89.9566	down	Protein of unknown function
ANN04257	2.6719	0.000100482	4.58825	14.7353	7.47865	42.9615	88.8054	39.8067	up	Similar to ave: Protein aveugle (Drosophila melanogaster OX%3D7227)		ANN01854	-1.35901	0.0417279	78.3583	110.869	71.2697	33.2092	27.5286	41.3594	down	Similar to TRIP4: Activating signal cointegrator 1 (Homo sapiens OX%3D9606)
ANN04258	1.35065	0.00280758	55.8237	33.5638	34.9004	83.1808	118.407	118.214	up	Similar to TMEM181: Transmembrane protein 181 (Homo sapiens OX%3D9606)		ANN01968	-1.88992	0.015779	52.2389	80.4827	43.5537	19.5348	13.7643	14.4758	down	Similar to xgeA: Probable xyloglucan-specific endo-beta-1%2C4-glucanase A (Aspergillus terreus (strain NIH 2624 / FGSC A1156) OX%3D341663)
ANN04259	1.84705	0.0337822	8.41178	8.18629	12.4644	18.2815	26.4302	59.1069	up	Similar to Rim2: Mitochondrial carrier protein Rim2 (Drosophila melanogaster OX%3D7227)		ANN02246	-1.05103	0.0243508	383.956	335.892	394.953	266.65	124.739	146.826	down	Similar to vrk1: Serine/threonine-protein kinase VRK1 (Danio rerio OX%3D7955)
ANN04261	1.79418	0.021165	8.41178	15.554	9.97153	38.3911	22.2013	57.9007	up	Similar to snx17: Sorting nexin-17 (Danio rerio OX%3D7955)		ANN02576	-1.48005	0.0410901	336.941	127.294	92.0567	91.8135	60.2189	46.5293	down	Protein of unknown function
ANN04262	3.16854	0.000723064	3.05883	1.63726	4.98577	21.9378	24.3158	37.3942	up	Similar to Eif4ebp2: Eukaryotic translation initiation factor 4E-binding protein 2 (Mus musculus OX%3D10090)		ANN02577	-1.84521	0.043624	73.1344	55.8452	45.5334	27.3487	6.88216	14.4758	down	Similar to mGluR: Metabotropic glutamate receptor (Drosophila melanogaster OX%3D7227)
ANN04272	1.12138	0.00548008	55.059	76.1325	46.1183	141.682	117.35	129.07	up	Similar to CCT1: T-complex protein 1 subunit alpha (Drosophila melanogaster OX%3D7227)		ANN02777	-4.2936	0.0225734	33.9553	37.7776	3.95943	3.90696	0	0	down	Similar to Retrovirus-related Pol polyprotein from type-1 retrotransposable element R1 (Fragment) (Bradysia coprophila OX%3D38358)
ANN04345	1.74313	4.01427e-05	27.5295	25.3775	27.4217	87.7512	84.5765	96.5011	up	Similar to SmydA-8: SET domain-containing protein SmydA-8%2C isoform A (Drosophila melanogaster OX%3D7227)		ANN03435	-3.38611	0.0495571	14.3657	16.425	27.716	0	3.44108	2.06797	down	Similar to pol: Retrovirus-related Pol polyprotein from transposon 17.6 (Drosophila melanogaster OX%3D7227)
ANN04374	1.40544	1.39862e-08	161.353	207.932	246.795	557.586	543.404	523.518	up	Similar to SQOR: Sulfide:quinone oxidoreductase%2C mitochondrial (Homo sapiens OX%3D9606)		ANN03545	-1.64797	0.00504279	266.418	138.792	87.1075	56.6509	48.1751	51.6992	down	Protein of unknown function
ANN04406	4.83994	0.00578004	1.52942	0	0	25.5941	16.9153	7.23758	up	Similar to Retrovirus-related Pol polyprotein from type-1 retrotransposable element R2 (Fragment) (Popillia japonica OX%3D7064)		ANN03987	-6.97712	0.000310868	20.8955	19.7101	25.7363	0	0	0	down	Similar to PFB0460c: Uncharacterized protein PFB0460c (Plasmodium falciparum (isolate 3D7) OX%3D36329)
ANN04425	1.12977	0.00548008	45.8825	66.309	51.1041	133.455	104.663	119.42	up	Similar to exc-4: Chloride intracellular channel exc-4 (Caenorhabditis elegans OX%3D6239)		ANN04149	-1.04537	0.0243454	387.873	219.274	294.978	167.023	160.01	108.568	down	Similar to vat1: Synaptic vesicle membrane protein VAT-1 homolog (Danio rerio OX%3D7955)
ANN04442	5.51892	0.0349943	0	0	0	0.914075	2.11441	20.5065	up	Protein of unknown function		ANN04500	-1.73885	0.00734738	142.351	177.391	178.174	91.8135	20.6465	37.2234	down	Similar to CTH: Cystathionine gamma-lyase (Bos taurus OX%3D9913)
ANN04462	2.03098	0.0314716	7.64708	4.91178	7.47865	33.8208	12.6865	34.9816	up	Similar to Pold1: DNA polymerase delta catalytic subunit (Rattus norvegicus OX%3D10116)		ANN04799	-2.95317	4.82271e-17	929.852	653.717	674.093	87.9066	150.547	51.6992	down	Similar to HSP70A1: Heat shock protein 70 A1 (Anopheles albimanus OX%3D7167)
ANN04517	4.51019	0.00094032	0	1.63726	1.24644	21.9378	20.0869	20.5065	up	Protein of unknown function		ANN05133	-3.58972	0.00016023	86.1941	82.1252	20.787	1.95348	10.3232	3.10195	down	Similar to pol: RNA-directed DNA polymerase from mobile element jockey (Drosophila melanogaster OX%3D7227)
ANN04738	7.59039	8.32762e-07	0	0	0	42.0474	33.8306	21.7127	up	Protein of unknown function		ANN05534	-1.2086	0.0180773	1575	702.992	631.529	567.486	413.79	276.074	down	Similar to Cyp6a2: Cytochrome P450 6a2 (Drosophila melanogaster OX%3D7227)
ANN04741	2.79453	0.013408	9.17649	1.63726	0	34.7348	29.6018	15.6814	up	Similar to X-element\ORF2: Probable RNA-directed DNA polymerase from transposon X-element (Drosophila melanogaster OX%3D7227)		ANN05566	-1.64917	0.00500478	87.5001	219.274	265.282	74.2322	67.1011	41.3594	down	Protein of unknown function
ANN04750	7.51688	1.49786e-06	0	0	0	20.1096	27.4874	45.838	up	Similar to CFDP2: Craniofacial development protein 2 (Bos taurus OX%3D9913)		ANN05613	-7.05332	0.000205419	23.5075	24.6376	21.7769	0	0	0	down	Similar to RTase: Probable RNA-directed DNA polymerase from transposon BS (Drosophila melanogaster OX%3D7227)
ANN04849	2.65784	1.94606e-05	6.11766	12.2794	8.72509	36.563	69.7756	65.1382	up	Similar to Ube2j1: Ubiquitin-conjugating enzyme E2 J1 (Mus musculus OX%3D10090)		ANN06191	-1.78086	0.0048283	340.859	103.478	162.337	47.8603	39.5724	88.9226	down	Protein of unknown function
ANN05052	1.04852	0.00431797	68.059	85.1375	93.4831	203.839	140.608	162.846	up	Similar to kti12: Protein KTI12 homolog (Danio rerio OX%3D7955)		ANN06613	-1.17579	0.000513829	7121.46	5344.71	5497.67	3735.05	1813.45	2402.98	down	Similar to Tctp: Translationally-controlled tumor protein homolog (Plutella xylostella OX%3D51655)
ANN05060	1.28544	0.0150003	26.7648	37.657	43.6255	82.2667	119.464	59.1069	up	Similar to pol: RNA-directed DNA polymerase from mobile element jockey (Drosophila melanogaster OX%3D7227)		ANN06875	-1.0928	0.000513829	4894.78	3882.06	4431.59	2740.73	1455.58	1996.62	down	Similar to UQCRFS1: Cytochrome b-c1 complex subunit Rieske%2C mitochondrial (Lagothrix lagotricha OX%3D9519)
ANN05346	4.5792	0.0164727	0	0	2.49288	3.6563	35.945	8.44385	up	Similar to PSME3: Proteasome activator complex subunit 3 (Gallus gallus OX%3D9031)		ANN06959	-3.53851	0.0112398	32.6493	50.9176	28.7059	9.7674	0	0	down	Similar to MFSD6: Major facilitator superfamily domain-containing protein 6 (Homo sapiens OX%3D9606)
ANN05392	1.21994	0.00241483	50.4707	49.9364	47.3648	116.087	135.322	92.8823	up	Similar to cdt1: DNA replication factor Cdt1 (Xenopus laevis OX%3D8355)		ANN07066	-1.76476	0.00500478	96.6419	167.535	99.9756	52.744	18.9259	36.1894	down	Similar to UGT2B18: UDP-glucuronosyltransferase 2B18 (Macaca fascicularis OX%3D9541)
ANN05411	1.00536	3.02942e-05	248.53	321.721	327.814	581.352	634.324	583.832	up	Similar to Timm10: Mitochondrial import inner membrane translocase subunit Tim10 (Rattus norvegicus OX%3D10116)		ANN07299	-7.8099	6.34951e-20	300.373	231.593	328.633	0	0	4.13594	down	Similar to TIE1: Tyrosine-protein kinase receptor Tie-1 (Bos taurus OX%3D9913)
ANN05482	5.32866	0.00672006	0	0.818629	0	6.39852	19.0297	14.4752	up	Similar to TY3B-I: Transposon Ty3-I Gag-Pol polyprotein (Saccharomyces cerevisiae (strain ATCC 204508 / S288c) OX%3D559292)		ANN07350	-3.60841	0.0159098	26.1194	26.2801	18.8073	3.90696	0	2.06797	down	Similar to jockey\pol: RNA-directed DNA polymerase from mobile element jockey (Drosophila funebris OX%3D7221)
ANN05499	2.99114	0.000495298	9.17649	4.09315	7.47865	33.8208	15.8581	115.801	up	Similar to RTase: Probable RNA-directed DNA polymerase from transposon BS (Drosophila melanogaster OX%3D7227)		ANN07411	-1.60078	0.0360545	84.8881	82.9465	61.3712	37.1161	12.9041	25.8496	down	Similar to PPAF2: Phenoloxidase-activating factor 2 (Holotrichia diomphalia OX%3D33394)
ANN05588	1.37158	0.0405795	18.353	16.3726	21.1895	53.0163	30.659	60.3132	up	Protein of unknown function		ANN07644	-3.57472	1.10693e-07	61.3807	95.2653	68.3002	7.81392	6.88216	4.13594	down	Similar to Pla1a: Phospholipase A1 member A (Rattus norvegicus OX%3D10116)
ANN05673	2.34761	2.71412e-20	68.8237	78.5884	94.7295	452.467	407.025	363.085	up	Similar to nduf-6: Probable NADH dehydrogenase [ubiquinone] iron-sulfur protein 6%2C mitochondrial (Caenorhabditis elegans OX%3D6239)		ANN07710	-3.26664	0.00115621	28.7314	72.2702	84.1379	15.6278	1.72054	2.06797	down	Protein of unknown function
ANN05690	2.19109	1.80192e-09	37.4707	58.9413	29.9146	164.533	239.986	178.527	up	Similar to PRDX6: Peroxiredoxin-6 (Bos taurus OX%3D9913)		ANN07754	-2.94906	0.0309142	19.5896	35.3139	17.8174	3.90696	3.44108	2.06797	down	Similar to not2: Homeobox protein not2 (Xenopus laevis OX%3D8355)
ANN05691	1.12013	4.35771e-07	673.708	960.252	767.808	1613.34	1896.63	1711.69	up	Similar to PRDX6: Peroxiredoxin-6 (Gallus gallus OX%3D9031)		ANN07825	-2.44588	0.000196418	75.7463	84.589	96.0162	6.83718	14.6246	25.8496	down	Similar to RGP1: RAB6A-GEF complex partner protein 2 (Homo sapiens OX%3D9606)
ANN05700	1.05281	0.0481157	30.5883	58.9413	39.8861	88.6652	71.89	108.564	up	Similar to Tars1: Threonine--tRNA ligase 1%2C cytoplasmic (Mus musculus OX%3D10090)		ANN07833	-1.22946	0.0443142	171.082	311.255	352.389	76.1857	192.7	86.8546	down	Similar to eRF1: Eukaryotic peptide chain release factor subunit 1 (Drosophila melanogaster OX%3D7227)
ANN05781	1.68715	0.000627527	23.7059	32.7452	17.4502	63.9852	84.5765	92.8823	up	Similar to Ack-like: Activated Cdc42 kinase-like (Drosophila melanogaster OX%3D7227)		ANN07873	-1.65208	0.00869194	139.739	114.975	125.712	23.4418	68.8216	27.9176	down	Similar to Rlip: RalA-binding protein 1 (Drosophila melanogaster OX%3D7227)
ANN05815	1.22539	0.00332681	80.2943	76.1325	149.573	285.191	159.638	264.172	up	Protein of unknown function		ANN07905	-2.39034	0.0306801	54.8508	25.4588	31.6754	11.7209	3.44108	6.2039	down	Protein of unknown function
ANN05831	1.42246	0.0171363	17.5883	18.0098	22.4359	42.0474	57.0892	55.4881	up	Similar to GVQW3: Protein GVQW3 (Homo sapiens OX%3D9606)		ANN07968	-1.77129	0.00478435	199.814	214.347	104.925	87.9066	35.2711	28.9515	down	Similar to Gld: Glucose dehydrogenase [FAD%2C quinone] (Drosophila pseudoobscura pseudoobscura OX%3D46245)
ANN05842	2.73759	0.000556335	11.4706	4.09315	2.49288	39.3052	27.4874	59.1069	up	Similar to Os06g0109600: UMP-CMP kinase 1 (Oryza sativa subsp. japonica OX%3D39947)		ANN08056	-1.47499	1.17023e-10	2951.5	2122.12	2240.05	812.648	904.144	913.008	down	Similar to SMYD5: SET and MYND domain-containing protein 5 (Gallus gallus OX%3D9031)
ANN05877	1.0512	0.0227409	115.471	50.755	114.673	170.932	247.386	161.639	up	Protein of unknown function		ANN08328	-1.15677	0.0156076	164.552	192.994	257.363	87.9066	115.276	72.3789	down	Similar to ZNF91: Zinc finger protein 91 (Homo sapiens OX%3D9606)
ANN05886	1.25386	1.14555e-05	1962.24	1797.71	3225.79	6878.41	5225.77	4544	up	Similar to L-ascorbate oxidase (Cucumis sativus OX%3D3659)		ANN08396	-1.29232	5.55144e-05	643.844	565.843	457.314	266.65	176.355	237.816	down	Similar to Klhl25: Kelch-like protein 25 (Mus musculus OX%3D10090)
ANN05929	1.15026	0.000311317	122.353	90.0492	122.151	279.707	260.073	200.24	up	Similar to pol: RNA-directed DNA polymerase from mobile element jockey (Drosophila melanogaster OX%3D7227)		ANN08634	-2.73372	1.63284e-09	267.724	147.004	126.702	28.3255	24.9478	27.9176	down	Similar to Spec2: CDC42 small effector protein homolog (Drosophila melanogaster OX%3D7227)
ANN05934	1.00644	0.0117442	70.3531	94.961	128.383	243.144	170.21	171.289	up	Similar to Ttpa: Alpha-tocopherol transfer protein (Mus musculus OX%3D10090)		ANN09228	-6.19964	0.000784923	472.762	190.531	184.113	0	10.3232	1.03398	down	Similar to Retrovirus-related Pol polyprotein from type-1 retrotransposable element R2 (Fragment) (Nasonia vitripennis OX%3D7425)
ANN05956	1.42903	0.0261962	16.0589	24.5589	12.4644	49.36	51.8031	43.4255	up	Similar to Btbd6: BTB/POZ domain-containing protein 6 (Mus musculus OX%3D10090)		ANN09455	-1.2517	0.00072077	791.419	684.925	772.089	420.975	190.98	332.943	down	Similar to TRMT112: Multifunctional methyltransferase subunit TRM112-like protein (Homo sapiens OX%3D9606)
ANN06152	2.67136	2.26468e-09	14.5294	17.1912	14.9573	80.4386	124.75	92.8823	up	Similar to PSMD7: 26S proteasome non-ATPase regulatory subunit 7 (Bos taurus OX%3D9913)		ANN09594	-1.67568	7.36011e-07	1179.29	820.431	769.119	345.766	340.667	178.879	down	Similar to Creg1: Protein CREG1 (Mus musculus OX%3D10090)
ANN06164	2.17087	0.00427283	7.64708	9.00492	4.98577	31.9926	35.945	31.3629	up	Protein of unknown function		ANN10021	-4.95718	5.98886e-15	207.649	82.9465	151.448	0.97674	6.88216	6.2039	down	Protein of unknown function
ANN06177	1.48155	2.54185e-06	74.1766	91.6865	92.2367	300.731	198.755	218.334	up	Similar to DHCR24: Delta(24)-sterol reductase (Homo sapiens OX%3D9606)		ANN10187	-1.21225	0.0410901	334.329	242.269	334.572	53.7207	169.473	169.573	down	Similar to CG5181: SOSS complex subunit B homolog (Drosophila melanogaster OX%3D7227)
ANN06243	4.39715	4.10783e-07	3.05883	1.63726	2.49288	51.1882	21.1441	79.6134	up	Similar to pol: Retrovirus-related Pol polyprotein from transposon 17.6 (Drosophila melanogaster OX%3D7227)		ANN10625	-2.6081	0.00127103	80.9702	47.6326	60.3813	3.90696	8.6027	18.6117	down	Similar to Plb1: Phospholipase B1%2C membrane-associated (Rattus norvegicus OX%3D10116)
ANN06268	1.26161	0.004866	41.2942	40.1128	28.6682	83.1808	94.0914	89.2635	up	Protein of unknown function		ANN11724	-1.59687	0.000142051	1710.82	785.939	1229.4	599.718	245.177	386.71	down	Similar to EbpIII: Ejaculatory bulb-specific protein 3 (Drosophila melanogaster OX%3D7227)
ANN06349	1.11116	0.0159768	35.1766	73.6766	78.5258	120.658	136.38	144.752	up	Similar to NDUFAF6: NADH dehydrogenase (ubiquinone) complex I%2C assembly factor 6 (Bos taurus OX%3D9913)		ANN11729	-1.85728	0.0370401	53.5448	52.5602	86.1176	5.86044	22.367	24.8156	down	Protein of unknown function
ANN06355	2.21247	1.69768e-06	95.5885	21.2844	63.5685	327.239	194.526	314.835	up	Similar to abcG23: ABC transporter G family member 23 (Dictyostelium discoideum OX%3D44689)		ANN11762	-1.06037	0.00599204	7553.74	4268.05	3279.4	2152.73	2522.31	2564.28	down	Similar to RpLP0: 60S acidic ribosomal protein P0 (Drosophila melanogaster OX%3D7227)
ANN06357	1.54942	0.0194559	21.4118	25.3775	7.47865	63.9852	45.4599	53.0756	up	Similar to abcG20: ABC transporter G family member 20 (Dictyostelium discoideum OX%3D44689)		ANN11779	-1.81839	0.0126407	61.3807	69.8065	51.4726	17.5813	13.7643	20.6797	down	Similar to ccdc149b: Coiled-coil domain-containing protein 149-B (Danio rerio OX%3D7955)
ANN06366	1.19483	0.0225472	45.1178	31.9265	39.8861	119.744	58.1464	89.2635	up	Similar to Megf8: Multiple epidermal growth factor-like domains protein 8 (Rattus norvegicus OX%3D10116)		ANN12103	-1.03848	0.0167069	295.15	238.163	301.907	154.325	95.49	157.166	down	Similar to Glutathione S-transferase (Blattella germanica OX%3D6973)
ANN06419	2.18527	1.52332e-22	117.765	108.878	134.616	561.242	509.574	565.738	up	Similar to GTF3C5: General transcription factor 3C polypeptide 5 (Homo sapiens OX%3D9606)		ANN12331	-2.52706	0.00599204	83.5822	55.0239	71.2697	2.93022	26.6684	6.2039	down	Protein of unknown function
ANN06488	1.80191	0.017584	6.11766	12.2794	13.7109	46.6178	31.7162	31.3629	up	Similar to Rpp40: Ribonuclease P protein subunit p40 (Rattus norvegicus OX%3D10116)		ANN12539	-1.58044	0.029988	246.829	126.473	199.951	123.069	29.2492	39.2914	down	Similar to Transposable element Tcb2 transposase (Caenorhabditis briggsae OX%3D6238)
ANN06612	1.25146	0.000495298	119.294	81.8629	122.151	335.465	246.329	184.558	up	Protein of unknown function		ANN12578	-1.15556	0.00958143	3454.29	2301.97	1730.27	1647.76	700.26	1012.27	down	Protein of unknown function
ANN06614	2.32132	1.16252e-23	148.353	151.446	168.27	867.457	856.337	609.163	up	Similar to Tctp: Translationally-controlled tumor protein homolog (Plutella xylostella OX%3D51655)		ANN13178	-1.20114	0.00207558	237.687	220.096	221.728	83.9996	117.857	93.0585	down	Similar to drk: Growth factor receptor-bound protein 2 (Drosophila melanogaster OX%3D7227)
ANN06628	3.28132	0.0046429	1.52942	0	7.47865	31.9926	12.6865	33.7754	up	Similar to pol: RNA-directed DNA polymerase from mobile element jockey (Drosophila melanogaster OX%3D7227)		ANN13205	-1.05043	0.00158751	10550.9	8336.53	6740.93	5306.63	4081.98	2984.08	down	Similar to RpL3: 60S ribosomal protein L3 (Drosophila melanogaster OX%3D7227)
ANN06650	4.18456	0.00579191	1.52942	0.818629	0	18.2815	15.8581	13.2689	up	Protein of unknown function		ANN13736	-1.94345	0.0023907	203.732	202.849	219.748	108.418	20.6465	34.1215	down	Similar to R1A1-element\ORF2: Putative 115 kDa protein in type-1 retrotransposable element R1DM (Drosophila melanogaster OX%3D7227)
ANN06651	3.80838	0.000805538	3.05883	0	2.49288	13.7111	33.8306	28.9503	up	Similar to Retrotransposable element SLACS 132 kDa protein (Trypanosoma brucei gambiense OX%3D31285)		ANN13919	-3.20051	0.00382738	22.2015	25.4588	57.4117	3.90696	3.44108	4.13594	down	Similar to Cyp4ac1: Probable cytochrome P450 4ac1 (Drosophila melanogaster OX%3D7227)
ANN06680	2.08047	1.37237e-08	33.6471	67.9462	42.379	167.276	195.583	248.49	up	Similar to SmydA-8: SET domain-containing protein SmydA-8%2C isoform A (Drosophila melanogaster OX%3D7227)		ANN14073	-1.07603	1.35517e-06	2218.85	1860.96	2108.4	1006.04	914.467	1014.34	down	Similar to SORD: Sorbitol dehydrogenase (Gallus gallus OX%3D9031)
ANN06682	1.66281	4.74989e-06	36.706	40.1128	54.8434	135.283	150.123	126.658	up	Similar to JMJD4: 2-oxoglutarate and iron-dependent oxygenase JMJD4 (Gallus gallus OX%3D9031)		ANN14221	-1.09492	0.0226749	158.023	288.26	286.069	108.418	102.372	133.384	down	Similar to svr: Carboxypeptidase D (Drosophila melanogaster OX%3D7227)
ANN06696	3.37082	2.46293e-05	6.88237	0.818629	4.98577	46.6178	28.5446	55.4881	up	Similar to pif1: ATP-dependent DNA helicase PIF1 (Xenopus laevis OX%3D8355)		ANN14273	-3.00279	3.54919e-08	97.9478	128.937	198.961	26.372	8.6027	18.6117	down	Protein of unknown function
ANN06734	2.39629	7.81001e-07	22.1765	18.8285	8.72509	80.4386	79.2905	109.77	up	Protein of unknown function		ANN15519	-3.49712	0.0180586	15.6717	22.9951	25.7363	1.95348	1.72054	2.06797	down	Protein of unknown function
ANN06735	1.58066	1.90569e-06	204.177	87.5933	157.052	416.818	412.311	513.868	up	Protein of unknown function		ANN15539	-1.8349	6.67964e-06	690.859	394.201	550.361	117.209	238.295	101.33	down	Similar to HSP70B2: Heat shock protein 70 B2 (Anopheles albimanus OX%3D7167)
ANN06738	1.86679	0.0306275	22.9412	16.3726	2.49288	28.3363	87.7481	41.013	up	Protein of unknown function		ANN15629	-1.29794	0.000156762	2037.32	1813.33	2031.19	1164.27	700.26	527.332	down	Similar to Polyubiquitin (Cricetulus griseus OX%3D10029)
ANN06798	4.51817	0.0145575	1.52942	0	0	16.4533	13.7437	9.65011	up	Protein of unknown function		ANN15974	-1.43526	0.000366319	837.128	776.084	763.18	460.044	172.054	247.122	down	Protein of unknown function
ANN06845	4.54733	1.17168e-14	3.05883	6.54904	4.98577	66.7275	108.892	164.052	up	Similar to pol: RNA-directed DNA polymerase from mobile element jockey (Drosophila melanogaster OX%3D7227)		ANN16070	-1.83494	0.00309892	78.3583	74.734	79.1886	27.3487	17.2054	20.6797	down	Similar to lcc1: Laccase-1 (Agaricus bisporus OX%3D5341)
ANN06936	6.09411	9.58239e-06	1.52942	0	0	53.9304	29.6018	37.3942	up	Similar to X-element\ORF2: Probable RNA-directed DNA polymerase from transposon X-element (Drosophila melanogaster OX%3D7227)		ANN16549	-1.27747	2.36111e-05	467.538	473.863	361.298	190.464	177.216	169.573	down	Similar to PNP: Purine nucleoside phosphorylase (Bos taurus OX%3D9913)
ANN07037	5.79822	0.00683952	0	0	0	3.6563	12.6865	12.0626	up	Similar to Tf2-9: Transposon Tf2-9 polyprotein (Schizosaccharomyces pombe (strain 972 / ATCC 24843) OX%3D284812)		ANN16771	-1.69478	0.000913495	487.127	674.248	244.495	227.58	95.49	111.67	down	Similar to Gld: Glucose dehydrogenase [FAD%2C quinone] (Drosophila melanogaster OX%3D7227)
ANN07040	1.2032	0.0373314	32.1177	29.4707	18.6966	50.2741	69.7756	67.5508	up	Similar to Cpsf100: Probable cleavage and polyadenylation specificity factor subunit 2 (Drosophila melanogaster OX%3D7227)		ANN17321	-1.91237	0.0426441	122.761	64.8789	37.6146	30.2789	6.88216	22.7476	down	Protein of unknown function
ANN07051	1.66116	0.0319999	13.7647	9.00492	14.9573	33.8208	60.2608	24.1253	up	Similar to Tubulin alpha-8 chain (Fragment) (Gallus gallus OX%3D9031)		ANN17337	-6.69358	0.00133555	26.1194	14.7825	13.858	0	0	0	down	Protein of unknown function
ANN07058	3.54915	1.1411e-20	41.2942	16.3726	17.4502	222.12	373.194	301.566	up	Protein of unknown function		ANN17485	-2.46248	2.57676e-05	624.254	199.564	128.681	43.9533	77.4243	50.6652	down	Similar to Mal-A1: Maltase A1 (Drosophila melanogaster OX%3D7227)
ANN07195	2.14013	8.02444e-07	22.9412	41.7501	66.0614	137.111	254.787	174.908	up	Protein of unknown function		ANN17598	-1.08219	0.000156762	1710.82	1141.54	1322.45	736.462	654.665	579.031	down	Similar to Tf2-6: Transposon Tf2-6 polyprotein (Schizosaccharomyces pombe (strain 972 / ATCC 24843) OX%3D284812)
ANN07262	1.10662	0.0163282	59.6472	42.5687	34.9004	104.205	87.7481	106.151	up	Similar to prel: Protein preli-like (Drosophila melanogaster OX%3D7227)		ANN17685	-1.47336	0.0302002	90.112	78.8402	66.3204	28.3255	35.2711	20.6797	down	Similar to atp6v0a1: V-type proton ATPase 116 kDa subunit a1 (Xenopus laevis OX%3D8355)
ANN07266	1.02548	0.00186275	411.413	799.801	765.315	1351	1044.52	1624.84	up	Protein of unknown function		ANN18687	-3.33323	0.0281721	30.0373	20.5313	29.6957	0.97674	0	7.23789	down	Similar to ZNF271: Zinc finger protein 271 (Pongo abelii OX%3D9601)
ANN07273	2.58562	0.00418913	3.82354	3.27452	6.23221	30.1645	23.2585	24.1253	up	Similar to Grik4: Glutamate receptor ionotropic%2C kainate 4 (Mus musculus OX%3D10090)		ANN18998	-2.78739	5.80479e-14	219.403	373.67	335.562	58.6044	30.1095	46.5293	down	Similar to Rich: Guanine nucleotide exchange factor subunit Rich (Drosophila melanogaster OX%3D7227)
ANN07291	1.74589	0.000144436	22.9412	40.9315	26.1753	120.658	76.1189	106.151	up	Similar to CPIJ003725: Adenylosuccinate synthetase (Culex quinquefasciatus OX%3D7176)		ANN19076	-1.97419	0.00146853	159.328	87.0528	141.55	44.93	13.7643	40.3254	down	Protein of unknown function
ANN07306	2.34259	7.82461e-24	107.059	159.633	152.066	697.439	746.388	673.095	up	Similar to elp6: Elongator complex protein 6 (Xenopus laevis OX%3D8355)		ANN19080	-1.72693	0.023595	54.8508	63.2364	113.834	15.6278	33.5505	20.6797	down	Similar to ZNF721: Zinc finger protein 721 (Homo sapiens OX%3D9606)
ANN07319	2.10707	0.00738691	12.2353	5.73041	6.23221	24.68	46.5171	34.9816	up	Similar to Transposon TX1 uncharacterized 149 kDa protein (Xenopus laevis OX%3D8355)		ANN19111	-1.22764	0.0322252	441.418	411.447	366.247	276.417	73.123	171.641	down	Similar to RTase: Probable RNA-directed DNA polymerase from transposon BS (Drosophila melanogaster OX%3D7227)
ANN07428	1.48924	4.40129e-09	142.236	212.025	172.009	531.077	497.944	447.524	up	Protein of unknown function		ANN19333	-1.45808	0.0211443	70.5224	103.478	116.803	46.8835	28.3889	31.0195	down	Similar to CNGA3: Cyclic nucleotide-gated cation channel alpha-3 (Homo sapiens OX%3D9606)
ANN07442	1.31461	2.31468e-06	201.883	173.549	129.63	467.092	439.798	354.642	up	Similar to hts: Protein hu-li tai shao (Drosophila melanogaster OX%3D7227)		ANN19588	-3.58504	1.70554e-07	100.56	121.545	103.935	16.6046	10.3232	0	down	Similar to Nmdar1: Glutamate [NMDA] receptor subunit 1 (Drosophila mojavensis OX%3D7230)
ANN07530	1.00366	0.00508747	394.589	939.787	841.348	1229.43	1444.14	1686.36	up	Similar to MRPL47: 39S ribosomal protein L47%2C mitochondrial (Homo sapiens OX%3D9606)		ANN19597	-1.72583	0.0072614	62.6866	88.6953	152.438	33.2092	24.9478	34.1215	down	Protein of unknown function
ANN07564	1.43829	9.9567e-05	68.059	48.2991	42.379	135.283	157.524	141.133	up	Similar to smc6: Structural maintenance of chromosomes protein 6 (Dictyostelium discoideum OX%3D44689)		ANN19598	-3.46365	1.13144e-20	372.202	471.399	430.588	63.4881	21.5068	31.0195	down	Similar to Nmdar1: Glutamate [NMDA] receptor subunit 1 (Drosophila yakuba OX%3D7245)
ANN07568	3.1384	1.31392e-06	4.58825	3.27452	13.7109	54.8445	51.8031	71.1696	up	Protein of unknown function		ANN19735	-3.88026	0.0109026	30.0373	289.902	272.211	7.81392	7.74243	24.8156	down	Similar to flz: Serine protease filzig (Drosophila melanogaster OX%3D7227)
ANN07600	2.36817	5.41357e-07	15.2942	47.4805	32.4075	124.314	238.929	126.658	up	Similar to ATP5F1A: ATP synthase subunit alpha%2C mitochondrial (Sus scrofa OX%3D9823)		ANN19800	-2.03497	3.57301e-07	222.015	203.671	190.053	39.0696	41.293	70.3109	down	Similar to nrf-6: Nose resistant to fluoxetine protein 6 (Caenorhabditis elegans OX%3D6239)
ANN07660	5.46876	0.0189764	0	0	0	10.9689	4.22883	7.23758	up	Similar to CFDP2: Craniofacial development protein 2 (Bos taurus OX%3D9913)		ANN19899	-1.94785	0.000321699	95.3359	107.584	176.195	37.1161	22.367	39.2914	down	Similar to AGRN: Agrin (Homo sapiens OX%3D9606)
ANN07677	6.23909	0.0013315	0	0	0	16.4533	16.9153	4.82505	up	Similar to PEG3: Paternally-expressed gene 3 protein (Bos taurus OX%3D9913)		ANN19917	-1.06403	0.0390382	19613.1	11908.2	13626.4	11467.9	3502.16	6623.7	down	Similar to PPO2: Phenoloxidase 2 (Drosophila melanogaster OX%3D7227)
ANN07682	1.4513	0.0285982	35.1766	19.6471	9.97153	72.2119	60.2608	48.2505	up	Similar to ddb1: DNA damage-binding protein 1 (Xenopus laevis OX%3D8355)
ANN07693	1.00919	0.00014455	200.353	187.466	243.056	385.74	481.029	399.273	up	Similar to ilys-3: Invertebrate-type lysozyme 3 (Caenorhabditis elegans OX%3D6239)
ANN07695	1.29242	1.05823e-08	346.413	253.775	329.061	744.971	733.701	796.134	up	Similar to TCERG1: Transcription elongation regulator 1 (Homo sapiens OX%3D9606)
ANN07709	3.35253	0.000322809	5.35295	3.27452	0	29.2504	23.2585	43.4255	up	Similar to RTase: Probable RNA-directed DNA polymerase from transposon BS (Drosophila melanogaster OX%3D7227)
ANN07716	5.37674	8.0877e-14	3.05883	4.09315	0	54.8445	159.638	113.389	up	Similar to pol: RNA-directed DNA polymerase from mobile element jockey (Drosophila melanogaster OX%3D7227)
ANN07784	4.36955	6.51613e-10	4.58825	4.09315	0	74.9541	74.0045	48.2505	up	Similar to pol: Retrovirus-related Pol polyprotein from transposon opus (Drosophila melanogaster OX%3D7227)
ANN07852	5.09431	2.28632e-09	3.05883	1.63726	0	42.9615	69.7756	67.5508	up	Similar to GVQW3: Protein GVQW3 (Homo sapiens OX%3D9606)
ANN07886	1.02556	0.0122982	91.7649	116.245	205.663	227.605	278.045	330.516	up	Similar to Gld: Glucose dehydrogenase [FAD%2C quinone] (Drosophila pseudoobscura pseudoobscura OX%3D46245)
ANN07983	3.3003	0.00629623	1.52942	4.09315	0	23.7659	21.1441	14.4752	up	Similar to ZMYM1: Zinc finger MYM-type protein 1 (Homo sapiens OX%3D9606)
ANN08003	4.36836	3.26367e-05	0	4.91178	0	23.7659	35.945	49.4568	up	Protein of unknown function
ANN08015	5.9941	0.00457994	0	0	0	5.48445	4.22883	22.919	up	Similar to HARBI1: Putative nuclease HARBI1 (Homo sapiens OX%3D9606)
ANN08156	6.25317	0.00135302	0	0	0	16.4533	4.22883	18.094	up	Similar to RTase: Probable RNA-directed DNA polymerase from transposon BS (Drosophila melanogaster OX%3D7227)
ANN08177	3.04178	0.0456883	6.11766	0	0	18.2815	8.45765	27.7441	up	Similar to Retrovirus-related Pol polyprotein from transposon TNT 1-94 (Nicotiana tabacum OX%3D4097)
ANN08203	3.66276	0.000122537	3.05883	1.63726	2.49288	23.7659	44.4027	22.919	up	Similar to pol: Retrovirus-related Pol polyprotein from transposon 17.6 (Drosophila melanogaster OX%3D7227)
ANN08242	2.69138	0.0232099	1.52942	5.73041	2.49288	36.563	16.9153	9.65011	up	Similar to Rsph4a: Radial spoke head protein 4 homolog A (Mus musculus OX%3D10090)
ANN08254	1.46405	0.0041904	26.7648	27.8334	26.1753	99.6341	62.3752	60.3132	up	Similar to Pol: LINE-1 retrotransposable element ORF2 protein (Mus musculus OX%3D10090)
ANN08314	1.49439	0.000225019	67.2943	44.206	41.1326	181.901	112.064	138.72	up	Protein of unknown function
ANN08337	5.62447	0.000117407	1.52942	0	0	22.8519	29.6018	34.9816	up	Similar to RTase: Probable RNA-directed DNA polymerase from transposon BS (Drosophila melanogaster OX%3D7227)
ANN08355	1.1875	0.000723064	58.1178	61.3972	67.3078	138.025	153.295	132.689	up	Similar to LINE-1 reverse transcriptase homolog (Nycticebus coucang OX%3D9470)
ANN08387	1.2637	0.00858349	30.5883	27.0148	41.1326	78.6104	74.0045	82.0259	up	Similar to GLRA3: Glycine receptor subunit alpha-3 (Homo sapiens OX%3D9606)
ANN08401	1.34162	0.00142401	40.5295	39.2942	57.3363	95.9778	106.778	142.339	up	Similar to R3hcc1l: Coiled-coil domain-containing protein R3HCC1L (Mus musculus OX%3D10090)
ANN08402	1.90921	1.17168e-14	129.236	120.339	113.426	477.147	373.194	516.281	up	Similar to CG8412: Probable Dol-P-Man:Man(7)GlcNAc(2)-PP-Dol alpha-1%2C6-mannosyltransferase (Drosophila melanogaster OX%3D7227)
ANN08706	6.10347	0.00195591	0	0	0	16.4533	6.34324	12.0626	up	Similar to X-element\ORF2: Probable RNA-directed DNA polymerase from transposon X-element (Drosophila melanogaster OX%3D7227)
ANN08758	5.51121	0.0169251	0	0	0	11.883	6.34324	4.82505	up	Similar to Tf2-6: Transposon Tf2-6 polyprotein (Schizosaccharomyces pombe (strain 972 / ATCC 24843) OX%3D284812)
ANN08791	1.46564	0.023116	10.7059	36.0197	26.1753	54.8445	60.2608	85.6447	up	Similar to eIF3-S5: Eukaryotic translation initiation factor 3 subunit F (Aedes aegypti OX%3D7159)
ANN08805	1.5801	0.00413863	14.5294	29.4707	22.4359	56.6726	63.4324	78.4071	up	Similar to eIF3f1: Eukaryotic translation initiation factor 3 subunit F-1 (Drosophila willistoni OX%3D7260)
ANN08827	1.54787	5.41147e-07	128.471	272.604	254.274	573.125	636.438	702.045	up	Similar to Ehd4: EH domain-containing protein 4 (Mus musculus OX%3D10090)
ANN08846	1.06893	0.000964848	115.471	157.995	188.213	259.597	372.137	332.929	up	Similar to Acad9: Complex I assembly factor ACAD9%2C mitochondrial (Mus musculus OX%3D10090)
ANN08857	1.34405	0.00466906	30.5883	27.8334	29.9146	83.1808	71.89	68.757	up	Similar to NEK2: Serine/threonine-protein kinase Nek2 (Homo sapiens OX%3D9606)
ANN08861	1.17181	0.00108566	81.8237	136.711	168.27	307.129	319.276	238.84	up	Similar to NGDN: Neuroguidin (Bos taurus OX%3D9913)
ANN08882	1.35197	0.0167883	26.7648	24.5589	22.4359	76.7823	43.3455	68.757	up	Similar to pol: RNA-directed DNA polymerase from mobile element jockey (Drosophila melanogaster OX%3D7227)
ANN08896	1.20573	0.0109318	52.0001	47.4805	28.6682	86.8371	89.8626	123.039	up	Similar to dpn: Protein deadpan (Drosophila melanogaster OX%3D7227)
ANN08913	1.19152	0.000385082	88.7061	78.5884	81.0187	166.362	233.643	167.671	up	Protein of unknown function
ANN09037	1.69059	0.000241615	21.4118	26.1961	28.6682	69.4697	81.4049	94.0886	up	Similar to CG4928: UNC93-like protein (Drosophila melanogaster OX%3D7227)
ANN09092	1.94572	0.00269267	14.5294	11.4608	17.4502	60.3289	28.5446	77.2009	up	Similar to MRPL53: 39S ribosomal protein L53%2C mitochondrial (Homo sapiens OX%3D9606)
ANN09113	1.08553	0.000613264	99.412	81.0443	109.687	210.237	214.613	188.177	up	Similar to TY3B-I: Transposon Ty3-I Gag-Pol polyprotein (Saccharomyces cerevisiae (strain ATCC 204508 / S288c) OX%3D559292)
ANN09177	2.98104	3.42338e-12	26.7648	27.8334	6.23221	170.932	143.78	183.352	up	Similar to B52: Serine-arginine protein 55 (Drosophila melanogaster OX%3D7227)
ANN09264	1.81444	0.027067	8.41178	9.82355	6.23221	31.9926	28.5446	26.5378	up	Similar to UPF0428 protein CXorf56 homolog (Bos taurus OX%3D9913)
ANN09280	1.221	0.000507256	74.9414	73.6766	104.701	232.175	198.755	154.402	up	Protein of unknown function
ANN09301	4.17146	0.00604555	1.52942	0.818629	0	14.6252	17.9725	14.4752	up	Similar to pol: Retrovirus-related Pol polyprotein from transposon 17.6 (Drosophila melanogaster OX%3D7227)
ANN09339	1.79364	1.01678e-09	57.3531	77.7698	61.0756	236.745	227.299	217.127	up	Similar to CG1139: Proton-coupled amino acid transporter-like protein CG1139 (Drosophila melanogaster OX%3D7227)
ANN09355	1.64804	5.37291e-05	32.8824	29.4707	44.8719	127.056	95.1486	109.77	up	Similar to Xirp2: Xin actin-binding repeat-containing protein 2 (Mus musculus OX%3D10090)
ANN09383	1.24483	7.02712e-05	116.236	173.549	224.359	393.052	451.427	366.704	up	Similar to MRRF: Ribosome-recycling factor%2C mitochondrial (Homo sapiens OX%3D9606)
ANN09429	1.32806	1.27319e-06	117.765	177.643	149.573	333.637	381.652	401.686	up	Similar to Acyp2: Acylphosphatase-2 (Mus musculus OX%3D10090)
ANN09442	2.23048	2.29056e-22	129.236	185.829	181.98	791.589	703.042	831.116	up	Similar to CNDP2: Cytosolic non-specific dipeptidase (Bos taurus OX%3D9913)
ANN09501	2.45503	0.00216149	4.58825	7.36766	6.23221	38.3911	21.1441	39.8067	up	Protein of unknown function
ANN09540	1.31699	0.0172074	31.353	35.2011	17.4502	81.3526	75.0617	55.4881	up	Similar to pol: RNA-directed DNA polymerase from mobile element jockey (Drosophila melanogaster OX%3D7227)
ANN09548	2.4284	0.00054579	16.8236	4.91178	4.98577	57.5867	42.2883	48.2505	up	Similar to KCNT2: Potassium channel subfamily T member 2 (Homo sapiens OX%3D9606)
ANN09551	3.29357	0.00177613	3.82354	0.818629	2.49288	28.3363	20.0869	21.7127	up	Similar to TY3B-G: Transposon Ty3-G Gag-Pol polyprotein (Saccharomyces cerevisiae (strain ATCC 204508 / S288c) OX%3D559292)
ANN09558	5.19585	1.99086e-18	3.82354	2.45589	3.73932	146.252	113.121	103.739	up	Similar to PGLS: 6-phosphogluconolactonase (Homo sapiens OX%3D9606)
ANN09567	3.38637	1.17716e-05	3.05883	10.6422	0	55.7586	41.2311	55.4881	up	Similar to R1A1-element\ORF2: Putative 115 kDa protein in type-1 retrotransposable element R1DM (Drosophila melanogaster OX%3D7227)
ANN09599	3.88912	0.00330359	0.764708	1.63726	1.24644	21.0237	17.9725	14.4752	up	Similar to Transposable element Tcb2 transposase (Caenorhabditis briggsae OX%3D6238)
ANN09602	2.31486	0.000255846	369.354	1244.32	1182.87	4805.29	4455.07	4650.15	up	Similar to PMPCB: Mitochondrial-processing peptidase subunit beta (Bos taurus OX%3D9913)
ANN09603	3.04069	2.02874e-07	10.7059	9.00492	4.98577	45.7037	67.6612	96.5011	up	Similar to egal-1: Egalitarian protein homolog (Caenorhabditis elegans OX%3D6239)
ANN09605	1.88021	0.0354641	9.17649	7.36766	6.23221	33.8208	34.8878	15.6814	up	Protein of unknown function
ANN09640	1.59716	0.0432342	7.64708	9.00492	22.4359	41.1334	39.1166	33.7754	up	Protein of unknown function
ANN09641	3.42301	4.4259e-16	9.17649	16.3726	13.7109	125.228	172.325	120.626	up	Protein of unknown function
ANN09708	4.87424	1.52386e-05	2.29412	0.818629	0	22.8519	49.6887	30.1566	up	Similar to RTase: Probable RNA-directed DNA polymerase from transposon BS (Drosophila melanogaster OX%3D7227)
ANN09710	4.67646	0.000188685	3.05883	0	0	43.8756	30.659	13.2689	up	Similar to Transposon TX1 uncharacterized 82 kDa protein (Xenopus laevis OX%3D8355)
ANN09712	4.77946	0.0167184	6.88237	0	0	58.5008	69.7756	68.757	up	Similar to pol: RNA-directed DNA polymerase from mobile element jockey (Drosophila melanogaster OX%3D7227)
ANN09717	1.73721	1.7764e-16	238.589	254.594	305.378	857.402	970.516	826.291	up	Similar to qtrt2: Queuine tRNA-ribosyltransferase accessory subunit 2 (Xenopus laevis OX%3D8355)
ANN09720	1.84761	1.07755e-06	35.1766	50.755	28.6682	128.885	130.036	158.021	up	Similar to Nca: Neurocalcin homolog (Drosophila melanogaster OX%3D7227)
ANN09721	1.22643	0.0277988	56.5884	32.7452	19.9431	83.1808	80.3477	96.5011	up	Similar to cnot1: CCR4-NOT transcription complex subunit 1 (Xenopus tropicalis OX%3D8364)
ANN09727	1.61056	0.00485474	41.2942	27.8334	19.9431	134.369	48.6315	91.676	up	Similar to Retrovirus-related Pol polyprotein from type-1 retrotransposable element R2 (Fragment) (Nasonia vitripennis OX%3D7425)
ANN09728	1.89862	0.000173889	16.8236	45.8432	71.0472	162.705	120.522	207.477	up	Similar to MRPS2: 28S ribosomal protein S2%2C mitochondrial (Homo sapiens OX%3D9606)
ANN09746	2.98897	6.97823e-33	62.706	63.0345	93.4831	578.609	622.695	517.487	up	Similar to pol: RNA-directed DNA polymerase from mobile element jockey (Drosophila melanogaster OX%3D7227)
ANN09748	3.22237	2.03089e-08	4.58825	13.0981	4.98577	80.4386	68.7184	66.3445	up	Similar to Cyp12d1-p: Probable cytochrome P450 12d1 proximal%2C mitochondrial (Drosophila melanogaster OX%3D7227)
ANN09749	2.10961	0.034141	9.17649	4.91178	2.49288	32.9067	16.9153	24.1253	up	Similar to CG6179: Nitric oxide synthase-interacting protein homolog (Drosophila melanogaster OX%3D7227)
ANN09752	1.35399	0.0482348	20.6471	17.1912	12.4644	38.3911	39.1166	53.0756	up	Similar to Arntl: Aryl hydrocarbon receptor nuclear translocator-like protein 1 (Nannospalax galili OX%3D1026970)
ANN09766	1.79353	0.00163944	20.6471	14.7353	41.1326	105.119	52.8603	101.326	up	Similar to Os05g0539400: Beta-galactosidase 8 (Oryza sativa subsp. japonica OX%3D39947)
ANN09899	1.24023	0.000849252	48.9413	54.8482	66.0614	142.596	138.494	117.008	up	Similar to asrij: OCIA domain-containing protein 1 (Drosophila melanogaster OX%3D7227)
ANN09925	1.15819	0.034141	43.5883	29.4707	52.3505	91.4075	126.865	59.1069	up	Similar to Aplip1: JNK-interacting protein 1 (Drosophila melanogaster OX%3D7227)
ANN09953	6.49607	0.000297412	0	0	0	11.883	14.8009	19.3002	up	Similar to Retrotransposable element SLACS 132 kDa protein (Trypanosoma brucei gambiense OX%3D31285)
ANN09985	6.09834	0.00264753	0	0	0	18.2815	12.6865	3.61879	up	Similar to F52C9.6: Putative uncharacterized transposon-derived protein F52C9.6 (Caenorhabditis elegans OX%3D6239)
ANN10010	1.4353	7.42904e-06	108.588	85.9561	163.284	280.621	364.736	314.835	up	Similar to nudt21: Cleavage and polyadenylation specificity factor subunit 5 (Danio rerio OX%3D7955)
ANN10016	1.68312	4.41789e-09	71.8825	86.7747	90.9902	225.776	304.475	268.997	up	Similar to sqh: Myosin regulatory light chain sqh (Drosophila melanogaster OX%3D7227)
ANN10017	1.24928	0.0373955	20.6471	45.0246	33.6539	62.1571	113.121	60.3132	up	Protein of unknown function
ANN10059	1.99142	0.0285071	7.64708	5.73041	12.4644	14.6252	56.0319	30.1566	up	Protein of unknown function
ANN10065	1.00831	0.00377922	87.9414	81.8629	67.3078	163.619	165.981	149.577	up	Similar to cid1: Terminal uridylyltransferase cid1 (Schizosaccharomyces pombe (strain 972 / ATCC 24843) OX%3D284812)
ANN10248	1.77677	2.96159e-05	26.0001	45.8432	28.6682	126.142	91.977	127.864	up	Similar to RAD54L: DNA repair and recombination protein RAD54-like (Fragment) (Gallus gallus OX%3D9031)
ANN10279	4.17291	0.030759	0	0	2.49288	12.797	6.34324	16.8877	up	Protein of unknown function
ANN10495	1.30999	2.96589e-11	500.884	532.109	595.799	1235.83	1350.05	1448.72	up	Similar to CCND2: G1/S-specific cyclin-D2 (Homo sapiens OX%3D9606)
ANN10504	3.91465	0.000322765	3.05883	0	2.49288	31.0785	33.8306	16.8877	up	Protein of unknown function
ANN10511	1.13893	9.21717e-06	317.354	267.692	360.222	571.297	825.678	681.539	up	Similar to Mp20: Muscle-specific protein 20 (Drosophila melanogaster OX%3D7227)
ANN10662	1.67645	0.00800096	19.1177	9.82355	17.4502	47.5319	41.2311	59.1069	up	Similar to TSN: Translin (Bos taurus OX%3D9913)
ANN10688	1.05025	0.0205447	46.6472	71.2208	115.919	164.533	153.295	160.433	up	Similar to Naa20: N-alpha-acetyltransferase 20 (Mus musculus OX%3D10090)
ANN10694	1.84878	1.06415e-07	62.706	47.4805	39.8861	186.471	213.556	144.752	up	Similar to X-element\ORF2: Probable RNA-directed DNA polymerase from transposon X-element (Drosophila melanogaster OX%3D7227)
ANN10697	1.74956	0.00543951	16.0589	18.0098	12.4644	73.126	34.8878	49.4568	up	Protein of unknown function
ANN10780	1.53745	0.000722595	26.0001	72.0394	52.3505	155.393	119.464	160.433	up	Protein of unknown function
ANN10819	4.00002	8.04179e-05	4.58825	0.818629	0	36.563	23.2585	36.1879	up	Similar to X-element\ORF2: Probable RNA-directed DNA polymerase from transposon X-element (Drosophila melanogaster OX%3D7227)
ANN10884	5.45222	0.0197258	0	0	0	10.9689	6.34324	4.82505	up	Protein of unknown function
ANN10923	2.80536	0.0217484	4.58825	0	3.73932	19.1956	21.1441	16.8877	up	Similar to Cisd2: CDGSH iron-sulfur domain-containing protein 2 homolog (Drosophila ananassae OX%3D7217)
ANN11199	5.08346	8.65263e-09	4.58825	0	0	71.2978	57.0892	48.2505	up	Similar to CFDP2: Craniofacial development protein 2 (Bos taurus OX%3D9913)
ANN11208	1.78998	0.000311317	22.9412	22.103	26.1753	113.345	63.4324	67.5508	up	Similar to Lip1: Lipase 1 (Drosophila melanogaster OX%3D7227)
ANN11271	1.21894	1.14091e-07	497.825	746.59	736.647	1561.24	1510.75	1534.37	up	Similar to TRAP1: Heat shock protein 75 kDa%2C mitochondrial (Bos taurus OX%3D9913)
ANN11343	5.50919	0.000128989	0	0	2.49288	28.3363	25.373	32.5691	up	Similar to harbi1: Putative nuclease HARBI1 (Danio rerio OX%3D7955)
ANN11401	2.26853	0.0214368	7.64708	4.91178	2.49288	36.563	21.1441	16.8877	up	Similar to Cyp4g1: Cytochrome P450 4g1 (Drosophila melanogaster OX%3D7227)
ANN11428	2.26234	4.93242e-05	15.2942	8.18629	23.6824	86.8371	52.8603	80.8197	up	Similar to Cyp313a3: Probable cytochrome P450 313a3 (Drosophila melanogaster OX%3D7227)
ANN11490	4.19582	0.0055643	1.52942	0.818629	0	18.2815	12.6865	16.8877	up	Similar to pol: RNA-directed DNA polymerase from mobile element jockey (Drosophila melanogaster OX%3D7227)
ANN11553	2.13909	1.44547e-18	94.8238	86.7747	78.5258	358.317	401.738	390.829	up	Similar to SIRT1: NAD-dependent protein deacetylase sirtuin-1 (Homo sapiens OX%3D9606)
ANN11654	1.21767	0.0024715	53.5295	49.9364	44.8719	94.1497	133.208	119.42	up	Similar to MTMR8: Myotubularin-related protein 8 (Gallus gallus OX%3D9031)
ANN11758	1.85463	7.74716e-06	35.9413	38.4756	34.9004	150.822	82.4621	162.846	up	Similar to AAEL003926: Translation factor GUF1 homolog%2C mitochondrial (Aedes aegypti OX%3D7159)
ANN11760	1.41652	0.0454157	8.41178	34.3824	49.8577	91.4075	63.4324	88.0572	up	Similar to CPIJ012086: Translation factor GUF1 homolog%2C mitochondrial (Culex quinquefasciatus OX%3D7176)
ANN11772	1.03784	2.93115e-05	322.707	347.917	361.468	855.574	589.921	670.683	up	Similar to RpLP0: 60S acidic ribosomal protein P0 (Ceratitis capitata OX%3D7213)
ANN11819	1.19238	0.00960874	54.2942	49.9364	29.9146	122.486	91.977	95.2948	up	Protein of unknown function
ANN11854	3.46852	0.00858349	6.88237	0	0	7.3126	40.1738	34.9816	up	Protein of unknown function
ANN11866	2.98469	0.0107571	6.11766	0	2.49288	20.1096	15.8581	33.7754	up	Similar to brat: Brain tumor protein (Drosophila melanogaster OX%3D7227)
ANN11892	3.66702	0.00439226	1.52942	0	3.73932	10.0548	24.3158	26.5378	up	Protein of unknown function
ANN11953	5.95156	4.40955e-07	93.2943	4.91178	23.6824	2271.48	2668.39	2623.62	up	Protein of unknown function
ANN11955	6.5227	4.04536e-05	0.764708	0	0	29.2504	32.7734	28.9503	up	Similar to X-element\ORF2: Probable RNA-directed DNA polymerase from transposon X-element (Drosophila melanogaster OX%3D7227)
ANN11967	1.54073	6.90933e-05	39.0001	76.1325	44.8719	155.393	148.009	164.052	up	Similar to Sam-S: S-adenosylmethionine synthase (Drosophila melanogaster OX%3D7227)
ANN11976	1.7005	0.0205474	13	7.36766	13.7109	42.0474	34.8878	32.5691	up	Similar to Manba: Beta-mannosidase (Rattus norvegicus OX%3D10116)
ANN12018	2.79357	0.000218369	7.64708	6.54904	2.49288	26.5082	50.7459	43.4255	up	Similar to pol: RNA-directed DNA polymerase from mobile element jockey (Drosophila melanogaster OX%3D7227)
ANN12058	5.34438	0.0264014	0	0	0	9.14075	4.22883	7.23758	up	Similar to R1A1-element\ORF1: Uncharacterized 50 kDa protein in type I retrotransposable element R1DM (Drosophila melanogaster OX%3D7227)
ANN12059	5.30553	0.0324338	0	0	0	3.6563	11.6293	4.82505	up	Similar to R1A1-element\ORF2: Putative 115 kDa protein in type-1 retrotransposable element R1DM (Drosophila melanogaster OX%3D7227)
ANN12109	3.27923	0.0046429	4.58825	0	2.49288	13.7111	23.2585	32.5691	up	Similar to RTase: Probable RNA-directed DNA polymerase from transposon BS (Drosophila melanogaster OX%3D7227)
ANN12180	1.9086	0.0134708	3.82354	12.2794	16.2037	37.4771	37.0022	43.4255	up	Similar to ybx2-a: Y-box-binding protein 2-A (Xenopus laevis OX%3D8355)
ANN12215	2.05018	0.00388791	6.11766	7.36766	21.1895	44.7897	45.4599	47.0443	up	Similar to RTase: Probable RNA-directed DNA polymerase from transposon BS (Drosophila melanogaster OX%3D7227)
ANN12227	1.32252	0.00434105	31.353	59.7599	46.1183	90.4934	104.663	148.37	up	Similar to Cyp313a2: Probable cytochrome P450 313a2 (Drosophila melanogaster OX%3D7227)
ANN12375	2.66923	0.003677	1.52942	6.54904	4.98577	25.5941	29.6018	26.5378	up	Similar to F52C9.6: Putative uncharacterized transposon-derived protein F52C9.6 (Caenorhabditis elegans OX%3D6239)
ANN12436	1.26855	3.69004e-08	249.295	229.216	215.634	632.54	528.603	512.662	up	Similar to Syngr: Synaptogyrin (Drosophila melanogaster OX%3D7227)
ANN12511	5.98212	0.00441495	0	0	0	6.39852	4.22883	21.7127	up	Similar to RTase: Probable RNA-directed DNA polymerase from transposon BS (Drosophila melanogaster OX%3D7227)
ANN12515	1.16884	0.00508991	81.059	68.7649	42.379	175.502	138.494	121.833	up	Protein of unknown function
ANN12547	1.38111	0.000141754	51.2354	61.3972	44.8719	128.885	153.295	130.276	up	Similar to Vps13: Vacuolar protein sorting-associated protein 13 (Drosophila melanogaster OX%3D7227)
ANN12562	1.12374	0.0173808	125.412	168.638	54.8434	280.621	185.011	300.36	up	Similar to y: Protein yellow (Drosophila yakuba OX%3D7245)
ANN12609	4.97478	1.01254e-13	4.58825	3.27452	0	117.916	78.2333	78.4071	up	Protein of unknown function
ANN12621	2.33633	0.00845987	6.11766	4.91178	4.98577	21.9378	21.1441	38.6004	up	Similar to wat: Fatty acyl-CoA reductase wat (Drosophila melanogaster OX%3D7227)
ANN12638	2.55734	8.68693e-07	7.64708	12.2794	24.9288	75.8682	90.9198	86.851	up	Similar to Samui: BAG domain-containing protein Samui (Bombyx mori OX%3D7091)
ANN12650	1.99636	2.70601e-05	22.9412	17.1912	28.6682	79.5245	120.522	71.1696	up	Similar to Slc16a12: Monocarboxylate transporter 12 (Mus musculus OX%3D10090)
ANN12652	1.02354	0.0283699	65.0002	35.2011	56.0899	114.259	101.492	101.326	up	Similar to acbd5a: Acyl-CoA-binding domain-containing protein 5A (Danio rerio OX%3D7955)
ANN12681	1.89367	0.00127568	13.7647	24.5589	9.97153	70.3838	63.4324	48.2505	up	Similar to BTAF1: TATA-binding protein-associated factor 172 (Homo sapiens OX%3D9606)
ANN12682	1.88645	0.0181659	3.82354	13.9167	12.4644	39.3052	29.6018	41.013	up	Similar to dimm: Protein dimmed (Drosophila melanogaster OX%3D7227)
ANN12687	5.86752	0.00140738	0	0	1.24644	10.0548	38.0594	9.65011	up	Protein of unknown function
ANN12749	2.00352	0.000584706	22.1765	9.82355	12.4644	53.0163	71.89	55.4881	up	Protein of unknown function
ANN12757	6.10731	0.00169923	0	0	0	8.22667	14.8009	12.0626	up	Similar to Retrovirus-related Pol polyprotein from type-1 retrotransposable element R1 (Fragment) (Bradysia coprophila OX%3D38358)
ANN12773	3.31777	4.10736e-07	9.9412	1.63726	6.23221	51.1882	63.4324	63.932	up	Similar to GA18292: Ubiquitin thioesterase OTU1 (Drosophila pseudoobscura pseudoobscura OX%3D46245)
ANN12778	1.80586	0.000806922	16.0589	16.3726	23.6824	49.36	79.2905	65.1382	up	Similar to smu1: WD40 repeat-containing protein SMU1 (Xenopus laevis OX%3D8355)
ANN12793	3.7132	0.000849252	0	3.27452	2.49288	26.5082	24.3158	21.7127	up	Protein of unknown function
ANN12813	2.00774	0.0220582	2.29412	11.4608	11.218	39.3052	28.5446	30.1566	up	Protein of unknown function
ANN12866	1.06678	0.0341668	39.0001	35.2011	43.6255	104.205	69.7756	71.1696	up	Similar to GSPT1: Eukaryotic peptide chain release factor GTP-binding subunit ERF3A (Homo sapiens OX%3D9606)
ANN12917	1.21901	0.00019379	64.2354	89.2306	86.0045	175.502	185.011	195.415	up	Similar to Alkbh5: RNA demethylase ALKBH5 (Mus musculus OX%3D10090)
ANN12918	1.50524	3.70458e-06	78.0002	67.1276	61.0756	223.034	208.27	155.608	up	Similar to POLN: DNA polymerase nu (Homo sapiens OX%3D9606)
ANN13059	1.1849	0.044684	42.8236	28.652	29.9146	101.462	84.5765	44.6318	up	Similar to UBA3: NEDD8-activating enzyme E1 catalytic subunit (Pongo abelii OX%3D9601)
ANN13069	3.03592	0.00195476	7.64708	2.45589	0	24.68	26.4302	38.6004	up	Similar to Picot: Putative inorganic phosphate cotransporter (Drosophila melanogaster OX%3D7227)
ANN13073	1.11652	0.0181659	33.6471	44.206	51.1041	110.603	77.1761	89.2635	up	Similar to Srp19: Signal recognition particle 19 kDa protein (Drosophila melanogaster OX%3D7227)
ANN13122	5.5725	2.35823e-23	2.29412	5.73041	2.49288	167.276	134.265	211.096	up	Protein of unknown function
ANN13201	6.16606	0.00235348	0	0	0	3.6563	23.2585	9.65011	up	Similar to RTase: Probable RNA-directed DNA polymerase from transposon BS (Drosophila melanogaster OX%3D7227)
ANN13203	1.3239	0.00633145	44.353	71.2208	79.7723	251.371	104.663	129.07	up	Similar to Pxd: Peroxidase (Drosophila melanogaster OX%3D7227)
ANN13280	2.38243	1.97177e-06	10.7059	30.2893	16.2037	109.689	74.0045	115.801	up	Similar to mRpL32: 39S ribosomal protein L32%2C mitochondrial (Drosophila melanogaster OX%3D7227)
ANN13297	3.00695	1.72194e-09	9.17649	21.2844	6.23221	98.7201	89.8626	114.595	up	Similar to pol: RNA-directed DNA polymerase from mobile element jockey (Drosophila melanogaster OX%3D7227)
ANN13351	1.98953	0.00332681	15.2942	9.82355	17.4502	25.5941	76.1189	66.3445	up	Similar to snk: Serine protease snake (Drosophila melanogaster OX%3D7227)
ANN13444	2.78489	0.00238278	3.05883	3.27452	7.47865	41.1334	14.8009	34.9816	up	Similar to RPS6: 40S ribosomal protein S6 (Gallus gallus OX%3D9031)
ANN13518	2.1681	2.20289e-07	40.5295	35.2011	29.9146	105.119	237.871	135.102	up	Similar to MYO18A: Unconventional myosin-XVIIIa (Homo sapiens OX%3D9606)
ANN13609	3.13964	0.000218859	7.64708	4.91178	0	25.5941	54.9747	38.6004	up	Similar to pol: RNA-directed DNA polymerase from mobile element jockey (Drosophila melanogaster OX%3D7227)
ANN13619	5.89183	0.00610106	0	0	0	12.797	14.8009	2.41253	up	Similar to Retrovirus-related Pol polyprotein from type-1 retrotransposable element R1 (Fragment) (Bradysia coprophila OX%3D38358)
ANN13628	5.50104	0.0177308	0	0	0	5.48445	12.6865	4.82505	up	Protein of unknown function
ANN13636	3.28008	2.15269e-05	2.29412	3.27452	8.72509	56.6726	42.2883	30.1566	up	Protein of unknown function
ANN13675	1.05662	0.0304688	46.6472	44.206	44.8719	115.173	64.4896	102.532	up	Similar to Sirt4: NAD-dependent protein deacylase Sirt4 (Drosophila melanogaster OX%3D7227)
ANN13730	1.53946	0.00113516	32.1177	19.6471	37.3932	87.7512	77.1761	91.676	up	Similar to CPM: Carboxypeptidase M (Homo sapiens OX%3D9606)
ANN13749	3.02651	0.0117546	7.64708	1.63726	0	29.2504	8.45765	43.4255	up	Similar to Transposable element Tcb2 transposase (Caenorhabditis briggsae OX%3D6238)
ANN13793	2.10835	1.44061e-07	26.0001	23.7403	47.3648	158.135	125.808	125.451	up	Similar to COPE: Coatomer subunit epsilon (Pongo abelii OX%3D9601)
ANN13888	1.56999	0.000471246	58.1178	26.1961	32.4075	110.603	128.979	109.77	up	Similar to SPECC1: Cytospin-B (Homo sapiens OX%3D9606)
ANN13916	6.18837	0.0011796	0	0	0	15.5393	10.5721	10.8564	up	Similar to Ccp84Ab: Cuticle protein (Anopheles gambiae OX%3D7165)
ANN13939	1.06076	1.39862e-08	1627.3	1820.63	1733.8	3991.76	3463.41	3352.21	up	Similar to RPL6: 60S ribosomal protein L6 (Bos taurus OX%3D9913)
ANN13978	5.35135	0.0316545	0	0	0	1.82815	10.5721	8.44385	up	Protein of unknown function
ANN13986	2.21191	0.0020697	10.7059	7.36766	7.47865	40.2193	26.4302	53.0756	up	Similar to RTase: Probable RNA-directed DNA polymerase from transposon BS (Drosophila melanogaster OX%3D7227)
ANN14024	5.88463	0.00790837	0	0	0	6.39852	2.11441	21.7127	up	Protein of unknown function
ANN14085	4.16984	0.00104907	1.52942	1.63726	0	25.5941	19.0297	18.094	up	Similar to BUD23: Probable 18S rRNA (guanine-N(7))-methyltransferase (Homo sapiens OX%3D9606)
ANN14094	1.07337	0.00352366	198.059	90.0492	158.298	346.434	290.732	301.566	up	Similar to Gld: Glucose dehydrogenase [FAD%2C quinone] (Drosophila pseudoobscura pseudoobscura OX%3D46245)
ANN14231	2.70961	0.030324	1.52942	3.27452	4.98577	5.48445	35.945	20.5065	up	Similar to pol: RNA-directed DNA polymerase from mobile element jockey (Drosophila melanogaster OX%3D7227)
ANN14240	2.26998	0.00107087	19.8824	8.18629	3.73932	45.7037	48.6315	65.1382	up	Similar to X-element\ORF2: Probable RNA-directed DNA polymerase from transposon X-element (Drosophila melanogaster OX%3D7227)
ANN14264	2.60699	4.28477e-06	10.7059	5.73041	22.4359	84.0949	82.4621	60.3132	up	Similar to CYP4C1: Cytochrome P450 4C1 (Blaberus discoidalis OX%3D6981)
ANN14271	2.77601	0.00141934	3.05883	8.18629	3.73932	16.4533	44.4027	43.4255	up	Similar to Fur1: Furin-like protease 1%2C isoform 1-CRR (Drosophila melanogaster OX%3D7227)
ANN14348	4.89869	5.35774e-06	0	2.45589	1.24644	42.0474	37.0022	28.9503	up	Similar to TY3B-G: Transposon Ty3-G Gag-Pol polyprotein (Saccharomyces cerevisiae (strain ATCC 204508 / S288c) OX%3D559292)
ANN14479	1.7506	0.0173041	12.2353	7.36766	24.9288	34.7348	68.7184	42.2192	up	Protein of unknown function
ANN14641	6.04685	0.00236084	0	0	0	12.797	6.34324	14.4752	up	Similar to X-element\ORF2: Probable RNA-directed DNA polymerase from transposon X-element (Drosophila melanogaster OX%3D7227)
ANN14644	4.18871	6.40744e-07	6.11766	0	2.49288	62.1571	70.8328	27.7441	up	Similar to RTase: Probable RNA-directed DNA polymerase from transposon BS (Drosophila melanogaster OX%3D7227)
ANN14654	1.1547	0.0194641	60.4119	81.0443	28.6682	125.228	145.895	112.183	up	Similar to CG5065: Putative fatty acyl-CoA reductase CG5065 (Drosophila melanogaster OX%3D7227)
ANN14655	1.61903	0.0012896	51.2354	26.1961	23.6824	107.861	72.9473	133.895	up	Similar to GTF2IRD2: General transcription factor II-I repeat domain-containing protein 2A (Homo sapiens OX%3D9606)
ANN14665	1.47171	0.0169251	19.8824	14.7353	17.4502	43.8756	56.0319	44.6318	up	Similar to Cox16: Cytochrome c oxidase assembly protein COX16 homolog%2C mitochondrial (Mus musculus OX%3D10090)
ANN14667	1.05698	0.0285765	41.2942	59.7599	38.6397	75.8682	114.178	102.532	up	Similar to Csnk2b: Casein kinase II subunit beta (Rattus norvegicus OX%3D10116)
ANN14702	4.89562	1.14091e-07	4.58825	0	0	44.7897	67.6612	42.2192	up	Similar to pol: Retrovirus-related Pol polyprotein from transposon 17.6 (Drosophila melanogaster OX%3D7227)
ANN14760	5.64515	6.97823e-33	12.2353	1.63726	4.98577	252.285	441.912	281.059	up	Similar to pol: RNA-directed DNA polymerase from mobile element jockey (Drosophila melanogaster OX%3D7227)
ANN14783	1.08303	0.0431618	32.8824	40.9315	48.6112	116.087	62.3752	78.4071	up	Similar to DDO: D-aspartate oxidase (Bos taurus OX%3D9913)
ANN14793	1.96074	0.0046429	33.6471	8.18629	9.97153	46.6178	66.604	92.8823	up	Similar to mth2: G-protein coupled receptor Mth2 (Drosophila yakuba OX%3D7245)
ANN14818	3.94281	0.000337608	3.05883	0	4.98577	7.3126	42.2883	67.5508	up	Similar to TY3B-I: Transposon Ty3-I Gag-Pol polyprotein (Saccharomyces cerevisiae (strain ATCC 204508 / S288c) OX%3D559292)
ANN14821	3.19239	3.20514e-19	18.353	39.2942	17.4502	225.776	229.414	241.253	up	Similar to skp1: S-phase kinase-associated protein 1 (Xenopus laevis OX%3D8355)
ANN14854	1.96949	0.000452958	30.5883	48.2991	7.47865	98.7201	138.494	108.564	up	Protein of unknown function
ANN14875	1.49345	0.000149056	49.706	68.7649	34.9004	156.307	156.467	123.039	up	Similar to TIMM9: Mitochondrial import inner membrane translocase subunit Tim9 (Homo sapiens OX%3D9606)
ANN14913	5.98414	1.53181e-05	1.52942	0	0	42.9615	30.659	38.6004	up	Protein of unknown function
ANN14944	1.05733	0.000731639	172.824	328.27	246.795	530.163	457.77	568.15	up	Similar to MRPS34: 28S ribosomal protein S34%2C mitochondrial (Bos taurus OX%3D9913)
ANN15021	1.34335	3.93189e-05	130	264.417	246.795	528.335	640.667	453.555	up	Protein of unknown function
ANN15040	5.29674	0.000813276	0	1.63726	0	12.797	19.0297	38.6004	up	Protein of unknown function
ANN15197	7.94216	1.73002e-07	0	0	0	42.9615	62.3752	19.3002	up	Protein of unknown function
ANN15215	1.80891	0.0455988	6.11766	8.18629	7.47865	23.7659	21.1441	31.3629	up	Similar to fignl1: Fidgetin-like protein 1 (Xenopus tropicalis OX%3D8364)
ANN15217	4.12355	0.000230983	0	1.63726	4.98577	15.5393	21.1441	66.3445	up	Protein of unknown function
ANN15274	4.30417	0.0285255	1.52942	0	0	7.3126	12.6865	14.4752	up	Protein of unknown function
ANN15367	1.85553	0.00244991	13.7647	13.0981	19.9431	63.9852	68.7184	33.7754	up	Similar to TY3B-G: Transposon Ty3-G Gag-Pol polyprotein (Saccharomyces cerevisiae (strain ATCC 204508 / S288c) OX%3D559292)
ANN15518	2.1193	5.81903e-05	14.5294	13.0981	22.4359	65.8134	91.977	55.4881	up	Similar to Pcyt2: Ethanolamine-phosphate cytidylyltransferase (Mus musculus OX%3D10090)
ANN15630	1.73184	3.38198e-20	842.708	920.139	1130.52	3232.17	3193.82	3172.47	up	Similar to ubq-1: Polyubiquitin-A (Caenorhabditis elegans OX%3D6239)
ANN15634	2.69148	3.04623e-05	6.11766	8.18629	7.47865	37.4771	47.5743	55.4881	up	Protein of unknown function
ANN15650	1.37078	6.0287e-06	164.412	103.966	163.284	407.677	296.018	410.13	up	Protein of unknown function
ANN15668	1.9573	0.000792025	14.5294	10.6422	17.4502	42.0474	59.2036	62.7257	up	Similar to LINE-1 reverse transcriptase homolog (Nycticebus coucang OX%3D9470)
ANN15756	2.54303	0.00472998	0.764708	9.82355	14.9573	51.1882	21.1441	71.1696	up	Protein of unknown function
ANN15781	5.62761	0.0181434	0	0	0	3.6563	19.0297	2.41253	up	Similar to WZCI: Serpin-Z1A (Triticum aestivum OX%3D4565)
ANN15815	1.49882	0.00820884	34.4118	24.5589	26.1753	46.6178	120.522	74.7883	up	Similar to Ankmy2: Ankyrin repeat and MYND domain-containing protein 2 (Mus musculus OX%3D10090)
ANN15876	4.34677	0.00127572	3.05883	0	0	25.5941	10.5721	33.7754	up	Protein of unknown function
ANN15910	5.59087	0.0127342	0	0	0	11.883	5.28603	7.23758	up	Similar to pol: Retrovirus-related Pol polyprotein from transposon 17.6 (Drosophila melanogaster OX%3D7227)
ANN15940	1.01667	0.0129327	170.53	110.515	79.7723	289.762	190.297	254.522	up	Protein of unknown function
ANN15954	4.58244	6.9594e-06	4.58825	0	0	28.3363	32.7734	62.7257	up	Protein of unknown function
ANN15961	5.53307	0.015713	0	0	0	7.3126	4.22883	12.0626	up	Protein of unknown function
ANN15967	2.38832	0.0402934	8.41178	3.27452	0	23.7659	23.2585	18.094	up	Protein of unknown function
ANN15991	1.77393	0.0154121	18.353	8.18629	12.4644	39.3052	65.5468	28.9503	up	Similar to Prmt7: Protein arginine N-methyltransferase 7 (Rattus norvegicus OX%3D10116)
ANN16041	2.12184	0.000408971	9.17649	25.3775	9.97153	68.5556	51.8031	75.9946	up	Protein of unknown function
ANN16043	2.83563	0.00178006	3.05883	6.54904	2.49288	18.2815	40.1738	30.1566	up	Similar to X-element\ORF2: Probable RNA-directed DNA polymerase from transposon X-element (Drosophila melanogaster OX%3D7227)
ANN16050	5.54859	0.015206	0	0	0	3.6563	10.5721	9.65011	up	Similar to Tf2-9: Transposon Tf2-9 polyprotein (Schizosaccharomyces pombe (strain 972 / ATCC 24843) OX%3D284812)
ANN16085	1.20156	0.00936965	40.5295	68.7649	72.2936	90.4934	163.867	161.639	up	Similar to Art7: Protein arginine N-methyltransferase 7 (Aedes aegypti OX%3D7159)
ANN16106	3.0088	2.20563e-21	41.2942	29.4707	26.1753	216.636	301.304	272.616	up	Similar to jockey\pol: RNA-directed DNA polymerase from mobile element jockey (Drosophila funebris OX%3D7221)
ANN16178	5.32611	0.0334705	0	0	0	10.9689	2.11441	7.23758	up	Similar to pol: RNA-directed DNA polymerase from mobile element jockey (Drosophila melanogaster OX%3D7227)
ANN16208	1.16714	0.000555784	300.53	718.757	651.889	1264.17	1138.61	1346.19	up	Similar to TUFM: Elongation factor Tu%2C mitochondrial (Bos taurus OX%3D9913)
ANN16409	5.29116	0.00673513	0.764708	0	0	14.6252	8.45765	15.6814	up	Protein of unknown function
ANN16472	3.03332	0.000849252	1.52942	6.54904	2.49288	29.2504	29.6018	28.9503	up	Similar to Ccdc65: Dynein regulatory complex subunit 2 (Mus musculus OX%3D10090)
ANN16519	3.99761	2.31732e-05	3.82354	2.45589	0	52.1023	37.0022	20.5065	up	Similar to HARBI1: Putative nuclease HARBI1 (Homo sapiens OX%3D9606)
ANN16600	1.22034	4.74196e-05	221.001	180.098	119.658	436.014	382.709	401.686	up	Similar to LCC5: Laccase-5 (Trametes villosa OX%3D47662)
ANN16649	2.53497	0.00220353	6.88237	3.27452	7.47865	30.1645	48.6315	21.7127	up	Similar to pol: RNA-directed DNA polymerase from mobile element jockey (Drosophila melanogaster OX%3D7227)
ANN16652	2.44775	3.80997e-07	22.1765	13.9167	9.97153	85.923	95.1486	75.9946	up	Similar to tmx3: Protein disulfide-isomerase TMX3 (Xenopus laevis OX%3D8355)
ANN16706	2.65521	0.00414155	5.35295	5.73041	2.49288	13.7111	33.8306	41.013	up	Similar to X-element\ORF2: Probable RNA-directed DNA polymerase from transposon X-element (Drosophila melanogaster OX%3D7227)
ANN16733	1.07034	3.75876e-09	1553.89	1548.85	1762.47	3324.49	3586.04	3301.54	up	Similar to AAEL006169: Lysosomal aspartic protease (Aedes aegypti OX%3D7159)
ANN16756	2.44914	0.0207791	3.05883	2.45589	7.47865	19.1956	33.8306	14.4752	up	Similar to Transposable element Tcb2 transposase (Caenorhabditis briggsae OX%3D6238)
ANN16878	3.37799	0.00667907	1.52942	1.63726	2.49288	29.2504	8.45765	19.3002	up	Similar to TY3B-G: Transposon Ty3-G Gag-Pol polyprotein (Saccharomyces cerevisiae (strain ATCC 204508 / S288c) OX%3D559292)
ANN16885	1.03756	0.000218499	186.589	171.912	218.127	407.677	453.542	318.454	up	Similar to SOD1: Superoxide dismutase [Cu-Zn] (Hylobates lar OX%3D9580)
ANN16886	1.18692	0.00502668	109.353	49.9364	66.0614	143.51	192.412	179.733	up	Protein of unknown function
ANN16919	1.72889	6.23534e-09	76.4708	79.4071	117.165	288.848	259.016	349.816	up	Similar to JUN: Transcription factor AP-1 (Serinus canaria OX%3D9135)
ANN16938	6.09825	0.00104973	24.4706	1.63726	0	617.914	567.72	624.845	up	Similar to Retrovirus-related Pol polyprotein from transposon TNT 1-94 (Nicotiana tabacum OX%3D4097)
ANN16987	1.3643	0.0101523	39.7648	22.9216	22.4359	62.1571	83.5193	75.9946	up	Similar to ZNF471: Zinc finger protein 471 (Homo sapiens OX%3D9606)
ANN17034	1.61889	0.0105966	41.2942	8.18629	42.379	108.775	90.9198	79.6134	up	Similar to CSAD: Cysteine sulfinic acid decarboxylase (Homo sapiens OX%3D9606)
ANN17053	1.568	0.00233223	41.2942	28.652	21.1895	125.228	64.4896	83.2322	up	Similar to CPE: Carboxypeptidase E (Pan troglodytes OX%3D9598)
ANN17063	1.82501	0.00487647	15.2942	9.82355	14.9573	34.7348	44.4027	62.7257	up	Protein of unknown function
ANN17072	5.2469	0.0351249	0	0	0	5.48445	4.22883	9.65011	up	Similar to CFDP2: Craniofacial development protein 2 (Bos taurus OX%3D9913)
ANN17140	1.95387	0.00264753	10.7059	10.6422	16.2037	65.8134	37.0022	39.8067	up	Similar to SPCC663.09c: Uncharacterized oxidoreductase C663.09c (Schizosaccharomyces pombe (strain 972 / ATCC 24843) OX%3D284812)
ANN17239	1.21043	6.17522e-06	163.647	140.804	127.137	360.145	346.764	294.328	up	Similar to Mal-B1: Maltase 1 (Drosophila virilis OX%3D7244)
ANN17254	5.96469	0.0032277	0	0	0	10.9689	6.34324	14.4752	up	Similar to RTase: Probable RNA-directed DNA polymerase from transposon BS (Drosophila melanogaster OX%3D7227)
ANN17258	5.86502	0.00426076	0	0	0	9.14075	8.45765	12.0626	up	Similar to X-element\ORF2: Probable RNA-directed DNA polymerase from transposon X-element (Drosophila melanogaster OX%3D7227)
ANN17261	2.41822	0.00202274	13	1.63726	9.97153	52.1023	33.8306	44.6318	up	Protein of unknown function
ANN17289	1.06453	0.0135503	97.1179	59.7599	49.8577	145.338	163.867	126.658	up	Protein of unknown function
ANN17295	2.39165	0.000250513	6.11766	13.9167	9.97153	74.04	40.1738	42.2192	up	Protein of unknown function
ANN17316	5.83669	2.26468e-09	3.05883	0	0	88.6652	60.2608	51.8693	up	Similar to LINE-1 retrotransposable element ORF2 protein (Homo sapiens OX%3D9606)
ANN17322	4.08417	0.00370359	3.05883	0	0	27.4222	14.8009	15.6814	up	Protein of unknown function
ANN17384	1.27529	3.03742e-10	2398.89	2316.72	2932.88	7066.71	5980.62	5457.14	up	Similar to to: Protein takeout (Drosophila melanogaster OX%3D7227)
ANN17390	3.01159	0.00733474	1.52942	6.54904	0	20.1096	27.4874	21.7127	up	Similar to RTase: Probable RNA-directed DNA polymerase from transposon BS (Drosophila melanogaster OX%3D7227)
ANN17392	6.39799	0.000554803	0	0	0	10.9689	22.2013	9.65011	up	Similar to X-element\ORF2: Probable RNA-directed DNA polymerase from transposon X-element (Drosophila melanogaster OX%3D7227)
ANN17475	2.11451	3.36215e-07	68.8237	49.1178	159.545	527.421	348.878	310.01	up	Protein of unknown function
ANN17476	1.06234	0.00172503	129.236	148.172	226.852	425.045	321.391	299.153	up	Protein of unknown function
ANN17477	1.47215	1.73043e-08	111.647	125.25	124.644	382.083	326.677	291.916	up	Protein of unknown function
ANN17523	1.13676	3.69011e-06	643.884	907.86	1076.93	2062.15	1809.94	1899.87	up	Similar to rpl-33: 60S ribosomal protein L35a (Caenorhabditis elegans OX%3D6239)
ANN17525	3.601	0.00010624	1.52942	1.63726	4.98577	32.9067	31.7162	26.5378	up	Similar to Pif1: ATP-dependent DNA helicase PIF1 (Mus musculus OX%3D10090)
ANN17527	1.1402	0.0154481	45.8825	30.2893	54.8434	91.4075	106.778	88.0572	up	Protein of unknown function
ANN17537	1.90948	5.06337e-05	42.8236	14.7353	37.3932	128.885	126.865	98.9136	up	Protein of unknown function
ANN17549	1.42575	1.21253e-08	140.706	181.736	140.848	405.849	452.484	388.417	up	Similar to Non1: Nucleolar GTP-binding protein 1 (Drosophila melanogaster OX%3D7227)
ANN17553	1.00802	0.00105093	145.294	245.589	193.198	358.317	440.855	375.148	up	Protein of unknown function
ANN17577	2.98588	6.46441e-13	21.4118	15.554	17.4502	99.6341	144.837	189.383	up	Protein of unknown function
ANN17706	1.33894	4.01427e-05	104	199.746	215.634	393.052	472.571	442.699	up	Protein of unknown function
ANN17773	1.62158	0.0413406	7.64708	10.6422	13.7109	36.563	26.4302	33.7754	up	Similar to Det1: DET1 homolog (Mus musculus OX%3D10090)
ANN17775	1.10244	0.0191173	41.2942	41.7501	82.2651	109.689	119.464	120.626	up	Similar to CG1523: DDB1- and CUL4-associated factor 10 homolog (Drosophila melanogaster OX%3D7227)
ANN17805	8.8042	5.58823e-10	0	0	0	80.4386	44.4027	102.532	up	Protein of unknown function
ANN17841	1.7304	0.00718438	9.17649	17.1912	14.9573	42.0474	50.7459	43.4255	up	Protein of unknown function
ANN17853	2.27119	0.0301212	6.11766	10.6422	0	32.9067	34.8878	16.8877	up	Similar to GCR2: Putative tyramine receptor 2 (Locusta migratoria OX%3D7004)
ANN17872	5.41741	0.0291481	0	0	0	14.6252	2.11441	4.82505	up	Protein of unknown function
ANN17888	3.55152	2.00841e-08	23.7059	4.91178	2.49288	68.5556	131.094	182.146	up	Similar to GVQW3: Protein GVQW3 (Homo sapiens OX%3D9606)
ANN17913	5.4333	0.0189639	0	0	0	7.3126	7.40045	7.23758	up	Similar to X-element\ORF2: Probable RNA-directed DNA polymerase from transposon X-element (Drosophila melanogaster OX%3D7227)
ANN17988	1.20215	0.00266551	114.706	313.535	281.696	528.335	448.256	653.795	up	Similar to IDH3B: Isocitrate dehydrogenase [NAD] subunit beta%2C mitochondrial (Homo sapiens OX%3D9606)
ANN18100	2.01595	6.66489e-05	29.0589	30.2893	21.1895	62.1571	96.2058	171.289	up	Similar to SETMAR: Histone-lysine N-methyltransferase SETMAR (Homo sapiens OX%3D9606)
ANN18244	6.02149	5.33164e-10	3.05883	0	0	49.36	74.0045	106.151	up	Similar to X-element\ORF2: Probable RNA-directed DNA polymerase from transposon X-element (Drosophila melanogaster OX%3D7227)
ANN18248	2.67224	0.00672006	3.05883	3.27452	4.98577	22.8519	31.7162	15.6814	up	Similar to LRRC27: Leucine-rich repeat-containing protein 27 (Homo sapiens OX%3D9606)
ANN18254	1.97657	0.0482348	6.11766	5.73041	6.23221	31.0785	27.4874	12.0626	up	Protein of unknown function
ANN18280	3.93591	2.37195e-32	34.4118	49.1178	23.6824	487.202	398.567	780.453	up	Similar to Nagk: N-acetyl-D-glucosamine kinase (Mus musculus OX%3D10090)
ANN18327	6.88475	6.98083e-05	0	0	0	16.4533	33.8306	9.65011	up	Similar to pol: RNA-directed DNA polymerase from mobile element jockey (Drosophila melanogaster OX%3D7227)
ANN18335	2.53934	6.05505e-11	27.5295	26.1961	14.9573	122.486	131.094	154.402	up	Similar to TY3B-I: Transposon Ty3-I Gag-Pol polyprotein (Saccharomyces cerevisiae (strain ATCC 204508 / S288c) OX%3D559292)
ANN18373	3.57777	0.0314836	3.05883	0	0	12.797	17.9725	9.65011	up	Protein of unknown function
ANN18388	3.76376	0.014765	3.05883	0	0	12.797	19.0297	14.4752	up	Similar to X-element\ORF2: Probable RNA-directed DNA polymerase from transposon X-element (Drosophila melanogaster OX%3D7227)
ANN18389	3.53578	0.0108472	3.05883	0.818629	0	12.797	21.1441	15.6814	up	Similar to X-element\ORF2: Probable RNA-directed DNA polymerase from transposon X-element (Drosophila melanogaster OX%3D7227)
ANN18455	2.4368	0.000356414	18.353	9.82355	2.49288	43.8756	74.0045	55.4881	up	Similar to R1A1-element\ORF2: Putative 115 kDa protein in type-1 retrotransposable element R1DM (Drosophila melanogaster OX%3D7227)
ANN18460	1.78616	0.0105171	14.5294	7.36766	12.4644	38.3911	41.2311	38.6004	up	Similar to CPE: Carboxypeptidase E (Bos taurus OX%3D9913)
ANN18486	1.86262	0.00632931	16.8236	11.4608	11.218	26.5082	63.4324	55.4881	up	Similar to RUNDC1: RUN domain-containing protein 1 (Homo sapiens OX%3D9606)
ANN18501	1.91044	7.3023e-09	1543.18	4509.83	3977.39	12426.8	11458	13815.3	up	Similar to blw: ATP synthase subunit alpha%2C mitochondrial (Drosophila melanogaster OX%3D7227)
ANN18503	1.91266	1.30592e-08	563.59	1685.56	1511.93	4667.27	4411.72	5074.75	up	Similar to blw: ATP synthase subunit alpha%2C mitochondrial (Drosophila melanogaster OX%3D7227)
ANN18620	1.40995	0.0229483	21.4118	13.0981	31.161	45.7037	63.4324	62.7257	up	Similar to BicD: Protein bicaudal D (Drosophila melanogaster OX%3D7227)
ANN18688	3.16564	0.00356084	1.52942	0.818629	9.97153	55.7586	33.8306	10.8564	up	Similar to RTase: Probable RNA-directed DNA polymerase from transposon BS (Drosophila melanogaster OX%3D7227)
ANN18712	3.78376	0.0132614	3.05883	0	0	17.3674	12.6865	16.8877	up	Similar to TY3B-G: Transposon Ty3-G Gag-Pol polyprotein (Saccharomyces cerevisiae (strain ATCC 204508 / S288c) OX%3D559292)
ANN18836	5.65001	0.015206	0	0	0	2.74222	17.9725	4.82505	up	Similar to jockey\pol: RNA-directed DNA polymerase from mobile element jockey (Drosophila funebris OX%3D7221)
ANN18851	3.23646	1.67231e-21	17.5883	28.652	21.1895	216.636	233.643	185.765	up	Similar to RTase: Probable RNA-directed DNA polymerase from transposon BS (Drosophila melanogaster OX%3D7227)
ANN19007	2.94427	2.69268e-09	5.35295	38.4756	32.4075	193.784	195.583	189.383	up	Similar to Unc-89: Obscurin (Drosophila melanogaster OX%3D7227)
ANN19033	1.26809	0.0229977	32.1177	20.4657	24.9288	53.0163	63.4324	71.1696	up	Similar to ZNF271: Zinc finger protein 271 (Pongo abelii OX%3D9601)
ANN19047	2.71217	0.000778103	9.9412	7.36766	0	40.2193	44.4027	36.1879	up	Similar to ZNF180: Zinc finger protein 180 (Homo sapiens OX%3D9606)
ANN19059	2.23981	1.3545e-07	18.353	20.4657	23.6824	95.0638	84.5765	113.389	up	Similar to ZNF271: Zinc finger protein 271 (Pongo abelii OX%3D9601)
ANN19060	5.46775	6.64899e-13	5.35295	0	0	100.548	85.6337	84.4385	up	Similar to RTase: Probable RNA-directed DNA polymerase from transposon BS (Drosophila melanogaster OX%3D7227)
ANN19079	1.45754	0.036965	21.4118	13.9167	9.97153	42.9615	39.1166	44.6318	up	Similar to Wdr5: WD repeat-containing protein 5 (Rattus norvegicus OX%3D10116)
ANN19105	1.87194	0.000166201	25.2354	23.7403	58.5827	85.923	126.865	173.702	up	Similar to ZNF721: Zinc finger protein 721 (Homo sapiens OX%3D9606)
ANN19107	2.49319	0.00378106	6.11766	6.54904	2.49288	38.3911	24.3158	25.3315	up	Similar to ZNF420: Zinc finger protein 420 (Bos taurus OX%3D9913)
ANN19131	1.97627	0.033186	10.7059	4.09315	4.98577	24.68	22.2013	32.5691	up	Protein of unknown function
ANN19157	1.14313	0.0463355	37.4707	43.3874	17.4502	74.04	71.89	74.7883	up	Similar to ICMT: Protein-S-isoprenylcysteine O-methyltransferase (Homo sapiens OX%3D9606)
ANN19217	6.18844	0.0023381	0	0	0	25.5941	6.34324	4.82505	up	Similar to air-2: Aurora/IPL1-related protein kinase 2 (Caenorhabditis elegans OX%3D6239)
ANN19366	1.79544	0.00370359	11.4706	14.7353	29.9146	47.5319	86.6909	55.4881	up	Similar to DNMT: DNA (cytosine-5)-methyltransferase PliMCI (Paracentrotus lividus OX%3D7656)
ANN19590	2.73303	2.25124e-13	24.4706	15.554	24.9288	139.853	142.723	145.958	up	Similar to Nmdar1: Glutamate [NMDA] receptor subunit 1 (Drosophila ananassae OX%3D7217)
ANN19591	2.81844	0.00478979	3.82354	5.73041	1.24644	13.7111	26.4302	39.8067	up	Similar to R1A1-element\ORF2: Putative 115 kDa protein in type-1 retrotransposable element R1DM (Drosophila melanogaster OX%3D7227)
ANN19594	5.53427	0.000235728	1.52942	0	0	35.6489	15.8581	30.1566	up	Similar to XKR4: XK-related protein 4 (Homo sapiens OX%3D9606)
ANN19595	6.53458	5.42028e-05	0	0	1.24644	17.3674	44.4027	30.1566	up	Similar to Lsm6: U6 snRNA-associated Sm-like protein LSm6 (Mus musculus OX%3D10090)
ANN19725	2.43454	0.000990263	3.05883	8.18629	13.7109	53.9304	41.2311	33.7754	up	Similar to Pif1: ATP-dependent DNA helicase PIF1 (Rattus norvegicus OX%3D10116)
ANN19820	1.22073	0.00251623	48.1766	39.2942	61.0756	109.689	113.121	120.626	up	Similar to uhrf1: E3 ubiquitin-protein ligase UHRF1 (Xenopus laevis OX%3D8355)
ANN19891	1.58486	0.0132312	29.0589	26.1961	14.9573	42.9615	116.293	54.2819	up	Similar to Cdk10: Cyclin-dependent kinase 10 (Rattus norvegicus OX%3D10116)
ANN19915	1.25287	0.0148758	29.8236	86.7747	76.0329	172.76	107.835	176.114	up	Similar to Smyd4: SET and MYND domain-containing protein 4 (Mus musculus OX%3D10090)
ANN00191	-2.18721	0.0139051	35.1766	24.5589	34.9004	5.48445	12.6865	2.41253	down	Protein of unknown function
ANN00207	-2.55547	0.00077509	37.4707	31.9265	51.1041	2.74222	8.45765	9.65011	down	Protein of unknown function
ANN00247	-5.94314	0.00330621	9.17649	21.2844	4.98577	0	0	0	down	Similar to jockey\pol: RNA-directed DNA polymerase from mobile element jockey (Drosophila funebris OX%3D7221)
ANN00340	-4.59733	0.0432005	10.7059	11.4608	4.98577	0.914075	0	0	down	Protein of unknown function
ANN00353	-5.3233	0.0214617	6.11766	4.91178	12.4644	0	0	0	down	Protein of unknown function
ANN00360	-3.60841	0.00470725	24.4706	22.9216	13.7109	3.6563	1.05721	0	down	Similar to Retrovirus-related Pol polyprotein from transposon TNT 1-94 (Nicotiana tabacum OX%3D4097)
ANN00377	-3.03234	4.61131e-07	74.9414	52.3923	52.3505	6.39852	8.45765	7.23758	down	Similar to Pol: LINE-1 retrotransposable element ORF2 protein (Mus musculus OX%3D10090)
ANN00420	-2.5016	0.00911768	52.0001	19.6471	27.4217	1.82815	4.22883	12.0626	down	Similar to PGBD3: PiggyBac transposable element-derived protein 3 (Homo sapiens OX%3D9606)
ANN00524	-2.61604	0.000587992	47.4119	37.657	64.815	2.74222	16.9153	4.82505	down	Similar to ZBED1: Zinc finger BED domain-containing protein 1 (Homo sapiens OX%3D9606)
ANN00573	-4.41996	0.00177598	20.6471	17.1912	27.4217	2.74222	0	0	down	Protein of unknown function
ANN00705	-2.72493	0.0456329	25.2354	22.103	22.4359	0	10.5721	0	down	Protein of unknown function
ANN00719	-2.39126	0.02376	27.5295	14.7353	22.4359	5.48445	4.22883	2.41253	down	Similar to pol: RNA-directed DNA polymerase from mobile element jockey (Drosophila melanogaster OX%3D7227)
ANN00730	-1.58355	0.0015965	130	132.618	64.815	25.5941	50.7459	33.7754	down	Similar to RTase: Probable RNA-directed DNA polymerase from transposon BS (Drosophila melanogaster OX%3D7227)
ANN00763	-2.49842	1.60446e-08	86.412	132.618	92.2367	20.1096	17.9725	16.8877	down	Protein of unknown function
ANN00795	-1.90357	0.0338243	20.6471	41.7501	28.6682	4.57037	12.6865	7.23758	down	Similar to nesd: Protein nessun dorma (Drosophila melanogaster OX%3D7227)
ANN01132	-1.26309	0.000409818	169.765	275.059	191.952	96.8919	69.7756	98.9136	down	Similar to UGT2B18: UDP-glucuronosyltransferase 2B18 (Macaca fascicularis OX%3D9541)
ANN01134	-1.29629	0.00243261	94.8238	92.5051	93.4831	40.2193	41.2311	32.5691	down	Similar to Pgant35A: Polypeptide N-acetylgalactosaminyltransferase 35A (Drosophila melanogaster OX%3D7227)
ANN01144	-5.11965	0.037323	6.11766	9.00492	4.98577	0	0	0	down	Protein of unknown function
ANN01196	-1.79242	0.000232139	84.1178	78.5884	89.7438	16.4533	34.8878	21.7127	down	Similar to VPS16: Vacuolar protein sorting-associated protein 16 homolog (Homo sapiens OX%3D9606)
ANN01268	-3.50095	0.0165479	15.2942	11.4608	19.9431	1.82815	2.11441	0	down	Similar to RTase: Probable RNA-directed DNA polymerase from transposon BS (Drosophila melanogaster OX%3D7227)
ANN01279	-1.43727	0.00800843	59.6472	103.147	76.0329	41.1334	21.1441	25.3315	down	Similar to 6-phosphofructo-2-kinase/fructose-2%2C6-bisphosphatase (Lithobates catesbeianus OX%3D8400)
ANN01310	-3.37379	1.4939e-05	41.2942	56.4854	29.9146	5.48445	4.22883	2.41253	down	Similar to K12H4.7: Putative serine protease K12H4.7 (Caenorhabditis elegans OX%3D6239)
ANN01314	-5.46715	0.0131806	6.88237	6.54904	12.4644	0	0	0	down	Similar to pcmt: Protein-L-isoaspartate(D-aspartate) O-methyltransferase (Danio rerio OX%3D7955)
ANN01323	-3.50748	0.0311857	6.11766	22.103	19.9431	0	4.22883	0	down	Protein of unknown function
ANN01333	-1.85247	1.76328e-07	163.647	334.819	272.971	84.0949	61.318	67.5508	down	Similar to Gas1: Growth arrest-specific protein 1 (Mus musculus OX%3D10090)
ANN01364	-5.29376	0.0234078	7.64708	4.09315	11.218	0	0	0	down	Protein of unknown function
ANN01365	-1.45772	8.95313e-05	149.118	111.334	169.516	56.6726	49.6887	49.4568	down	Similar to Kifbp: KIF-binding protein (Gallus gallus OX%3D9031)
ANN01380	-1.08704	0.0273463	92.5296	99.8728	123.398	67.6415	31.7162	48.2505	down	Similar to PPIH: Peptidyl-prolyl cis-trans isomerase H (Homo sapiens OX%3D9606)
ANN01421	-3.08952	0.0217809	20.6471	9.82355	22.4359	1.82815	4.22883	0	down	Similar to X-element\ORF2: Probable RNA-directed DNA polymerase from transposon X-element (Drosophila melanogaster OX%3D7227)
ANN01452	-1.03879	0.0495451	133.824	90.8679	112.18	37.4771	43.3455	84.4385	down	Similar to Hsf: Heat shock factor protein (Drosophila melanogaster OX%3D7227)
ANN01521	-1.17529	0.00154434	209.53	266.873	349.004	145.338	80.3477	138.72	down	Similar to Eukaryotic translation initiation factor 3 subunit K (Bombyx mori OX%3D7091)
ANN01540	-2.8443	0.049966	32.1177	4.91178	19.9431	5.48445	2.11441	0	down	Similar to R1A1-element\ORF2: Putative 115 kDa protein in type-1 retrotransposable element R1DM (Drosophila melanogaster OX%3D7227)
ANN01546	-2.40441	0.000250064	36.706	45.0246	68.5543	10.9689	6.34324	10.8564	down	Similar to SIDT1: SID1 transmembrane family member 1 (Homo sapiens OX%3D9606)
ANN01547	-4.11886	1.08324e-52	812.12	889.032	1322.47	70.3838	50.7459	51.8693	down	Similar to PPIB: Peptidyl-prolyl cis-trans isomerase B (Homo sapiens OX%3D9606)
ANN01549	-4.93107	0.00385232	30.5883	6.54904	24.9288	1.82815	0	0	down	Protein of unknown function
ANN01591	-1.54352	0.0191685	68.8237	74.4953	88.4973	49.36	17.9725	10.8564	down	Similar to Nsun5: 28S rRNA (cytosine-C(5))-methyltransferase (Drosophila melanogaster OX%3D7227)
ANN01606	-5.91403	1.74633e-05	26.0001	58.9413	43.6255	0	0	2.41253	down	Similar to pol: RNA-directed DNA polymerase from mobile element jockey (Drosophila melanogaster OX%3D7227)
ANN01623	-5.26824	0.0337956	6.11766	1.63726	14.9573	0	0	0	down	Similar to Tf2-9: Transposon Tf2-9 polyprotein (Schizosaccharomyces pombe (strain 972 / ATCC 24843) OX%3D284812)
ANN01672	-1.51806	0.0122031	52.0001	54.0295	48.6112	21.9378	12.6865	19.3002	down	Protein of unknown function
ANN01675	-1.41803	0.000617145	107.824	144.079	102.208	45.7037	52.8603	33.7754	down	Protein of unknown function
ANN01695	-3.86679	0.002657	16.8236	27.0148	18.6966	0	2.11441	2.41253	down	Similar to mariner\T: Mariner Mos1 transposase (Drosophila mauritiana OX%3D7226)
ANN01779	-1.31619	0.00441359	80.2943	97.4169	102.208	45.7037	26.4302	39.8067	down	Similar to RAB11FIP1: Rab11 family-interacting protein 1 (Homo sapiens OX%3D9606)
ANN01806	-1.54481	0.0198264	53.5295	55.6668	41.1326	10.9689	26.4302	14.4752	down	Similar to GABBR2: Gamma-aminobutyric acid type B receptor subunit 2 (Homo sapiens OX%3D9606)
ANN01834	-1.68169	0.000239407	215.648	198.927	118.412	55.7586	82.4621	27.7441	down	Protein of unknown function
ANN01838	-1.29693	0.000764532	117.765	115.427	168.27	56.6726	53.9175	51.8693	down	Protein of unknown function
ANN01839	-1.67163	8.22135e-07	367.06	779.335	855.059	193.784	178.668	255.728	down	Similar to nrv2: Sodium/potassium-transporting ATPase subunit beta-2 (Drosophila melanogaster OX%3D7227)
ANN01851	-2.09809	0.00302433	37.4707	37.657	42.379	6.39852	12.6865	8.44385	down	Protein of unknown function
ANN01853	-1.07021	0.0448739	103.236	65.4904	76.0329	29.2504	42.2883	45.838	down	Similar to vir: Protein virilizer (Drosophila pseudoobscura pseudoobscura OX%3D46245)
ANN01854	-2.35913	7.71131e-07	87.1767	86.7747	69.8007	18.2815	16.9153	12.0626	down	Similar to TRIP4: Activating signal cointegrator 1 (Homo sapiens OX%3D9606)
ANN01859	-2.09641	1.45796e-07	221.001	222.667	194.445	79.5245	26.4302	42.2192	down	Similar to Pgm2: Phosphoglucomutase-2 (Mus musculus OX%3D10090)
ANN01874	-4.1552	0.0438713	4.58825	7.36766	26.1753	0	2.11441	0	down	Protein of unknown function
ANN01882	-1.88749	0.016223	52.0001	46.6619	43.6255	18.2815	2.11441	18.094	down	Similar to CWC27: Spliceosome-associated protein CWC27 homolog (Homo sapiens OX%3D9606)
ANN01975	-2.51609	0.00704543	29.0589	20.4657	36.1468	1.82815	8.45765	4.82505	down	Similar to Fgd6: FYVE%2C RhoGEF and PH domain-containing protein 6 (Mus musculus OX%3D10090)
ANN01976	-1.23773	0.0177091	81.8237	63.8531	102.208	43.8756	35.945	24.1253	down	Similar to Sptlc2: Serine palmitoyltransferase 2 (Mus musculus OX%3D10090)
ANN02027	-1.56196	4.17719e-10	308.942	324.177	335.293	112.431	107.835	107.357	down	Protein of unknown function
ANN02044	-1.26152	4.76784e-06	344.118	295.525	284.189	115.173	150.123	120.626	down	Similar to Amfr: E3 ubiquitin-protein ligase AMFR (Mus musculus OX%3D10090)
ANN02045	-3.66171	4.84682e-16	100.941	162.907	225.606	13.7111	13.7437	10.8564	down	Similar to tbp: TATA-box-binding protein (Xenopus laevis OX%3D8355)
ANN02046	-5.41176	0.0179569	9.17649	3.27452	12.4644	0	0	0	down	Similar to Retrovirus-related Pol polyprotein from type-1 retrotransposable element R1 (Fragment) (Bradysia coprophila OX%3D38358)
ANN02048	-2.96912	1.99634e-05	40.5295	87.5933	76.0329	5.48445	17.9725	2.41253	down	Protein of unknown function
ANN02049	-3.67663	5.27326e-17	188.883	340.55	386.397	9.14075	41.2311	21.7127	down	Similar to ACAA2: 3-ketoacyl-CoA thiolase%2C mitochondrial (Homo sapiens OX%3D9606)
ANN02134	-1.33465	0.00131767	136.118	263.599	370.193	95.9778	105.721	102.532	down	Similar to Sfxn1-3: Sideroflexin-1-3 (Drosophila melanogaster OX%3D7227)
ANN02142	-2.29191	0.0218695	26.7648	31.1079	13.7109	3.6563	6.34324	4.82505	down	Protein of unknown function
ANN02153	-2.00028	6.25078e-05	87.9414	76.9512	102.208	22.8519	11.6293	32.5691	down	Similar to SHC4: SHC-transforming protein 4 (Homo sapiens OX%3D9606)
ANN02164	-2.20393	6.81195e-08	100.941	139.167	184.473	29.2504	24.3158	38.6004	down	Similar to Vps25: Vacuolar protein-sorting-associated protein 25 (Drosophila melanogaster OX%3D7227)
ANN02165	-3.47339	5.83402e-13	163.647	167.819	149.573	2.74222	21.1441	20.5065	down	Protein of unknown function
ANN02178	-2.22724	0.0285071	19.8824	22.103	46.1183	2.74222	3.17162	13.2689	down	Similar to VLDLR: Very low-density lipoprotein receptor (Gallus gallus OX%3D9031)
ANN02202	-2.16697	2.00841e-08	107.059	128.525	139.601	22.8519	29.6018	31.3629	down	Similar to acbp-1: Acyl-CoA-binding protein homolog 1 (Caenorhabditis elegans OX%3D6239)
ANN02234	-1.04459	2.73545e-05	689.766	823.541	811.433	350.091	458.828	317.247	down	Similar to Serpini1: Neuroserpin (Rattus norvegicus OX%3D10116)
ANN02244	-1.42806	1.67122e-06	705.061	820.267	1322.47	357.403	416.539	282.266	down	Protein of unknown function
ANN02249	-2.3251	0.0176825	14.5294	40.1128	27.4217	7.3126	6.34324	2.41253	down	Protein of unknown function
ANN02254	-1.03298	0.00178665	214.883	270.148	211.895	138.025	108.892	92.8823	down	Similar to pusl1: tRNA pseudouridine synthase-like 1 (Xenopus laevis OX%3D8355)
ANN02284	-1.65774	0.00178571	65.7649	58.1227	83.5116	21.0237	15.8581	28.9503	down	Similar to Mcrs1: Microspherule protein 1 (Mus musculus OX%3D10090)
ANN02362	-3.12368	0.00850745	15.2942	5.73041	92.2367	3.6563	2.11441	7.23758	down	Protein of unknown function
ANN02369	-1.69027	1.30592e-08	269.177	196.471	244.303	74.9541	77.1761	67.5508	down	Similar to Hexd: Hexosaminidase D (Mus musculus OX%3D10090)
ANN02409	-1.59091	3.72835e-08	295.942	383.119	382.658	127.97	137.437	85.6447	down	Similar to FBXW9: F-box/WD repeat-containing protein 9 (Bos taurus OX%3D9913)
ANN02422	-1.37984	0.00401774	92.5296	81.8629	95.976	32.9067	47.5743	22.919	down	Protein of unknown function
ANN02456	-4.314	0.0177091	14.5294	14.7353	12.4644	0	2.11441	0	down	Protein of unknown function
ANN02480	-1.88648	0.000373904	163.647	72.0394	103.455	20.1096	23.2585	49.4568	down	Similar to X-element\ORF2: Probable RNA-directed DNA polymerase from transposon X-element (Drosophila melanogaster OX%3D7227)
ANN02506	-1.66307	2.15369e-07	180.471	189.922	162.037	63.9852	49.6887	54.2819	down	Similar to dcaf8: DDB1- and CUL4-associated factor 8 (Xenopus tropicalis OX%3D8364)
ANN02536	-1.859	0.00561804	62.706	37.657	49.8577	12.797	21.1441	7.23758	down	Similar to pol: RNA-directed DNA polymerase from mobile element jockey (Drosophila melanogaster OX%3D7227)
ANN02712	-1.22347	0.0385006	101.706	57.3041	77.2794	20.1096	33.8306	48.2505	down	Similar to Tret1: Facilitated trehalose transporter Tret1 (Anopheles gambiae OX%3D7165)
ANN02745	-2.07278	7.68525e-13	278.354	233.309	312.857	74.04	54.9747	66.3445	down	Similar to LINE-1 reverse transcriptase homolog (Nycticebus coucang OX%3D9470)
ANN02777	-8.56865	4.50281e-05	13.7647	112.152	94.7295	0	0	0	down	Similar to Retrovirus-related Pol polyprotein from type-1 retrotransposable element R1 (Fragment) (Bradysia coprophila OX%3D38358)
ANN02814	-6.63468	0.000218696	36.706	8.18629	12.4644	0	0	0	down	Protein of unknown function
ANN02836	-3.42759	5.04846e-05	29.8236	37.657	48.6112	1.82815	2.11441	7.23758	down	Similar to LINE-1 retrotransposable element ORF2 protein (Homo sapiens OX%3D9606)
ANN03004	-3.08305	0.00280758	18.353	19.6471	44.8719	0.914075	4.22883	4.82505	down	Protein of unknown function
ANN03009	-2.03767	0.00262153	34.4118	49.1178	49.8577	12.797	6.34324	13.2689	down	Similar to GVQW3: Protein GVQW3 (Homo sapiens OX%3D9606)
ANN03075	-6.31545	0.000506724	21.4118	9.82355	14.9573	0	0	0	down	Similar to K02A2.6: Uncharacterized protein K02A2.6 (Caenorhabditis elegans OX%3D6239)
ANN03146	-2.24545	0.000130212	57.3531	63.8531	44.8719	14.6252	10.5721	9.65011	down	Protein of unknown function
ANN03149	-4.84654	0.0196263	10.7059	10.6422	11.218	0	1.05721	0	down	Protein of unknown function
ANN03192	-3.91201	0.00376509	19.8824	16.3726	27.4217	0	4.22883	0	down	Similar to RTase: Probable RNA-directed DNA polymerase from transposon BS (Drosophila melanogaster OX%3D7227)
ANN03201	-5.29153	0.000494305	14.5294	34.3824	33.6539	0	2.11441	0	down	Similar to X-element\ORF2: Probable RNA-directed DNA polymerase from transposon X-element (Drosophila melanogaster OX%3D7227)
ANN03254	-3.24397	0.0114883	21.4118	6.54904	32.4075	1.82815	2.11441	2.41253	down	Protein of unknown function
ANN03490	-5.16082	0.0391785	6.11766	2.45589	12.4644	0	0	0	down	Similar to Transposon TX1 uncharacterized 82 kDa protein (Xenopus laevis OX%3D8355)
ANN03557	-4.71023	0.0336636	7.64708	4.91178	17.4502	0	0	1.20626	down	Protein of unknown function
ANN03610	-6.33035	0.000517999	9.17649	13.0981	24.9288	0	0	0	down	Protein of unknown function
ANN03771	-3.40791	0.0485317	9.17649	27.8334	7.47865	0	4.22883	0	down	Similar to RTase: Probable RNA-directed DNA polymerase from transposon BS (Drosophila melanogaster OX%3D7227)
ANN03787	-3.06506	0.0125428	39.0001	9.00492	22.4359	0.914075	6.34324	1.20626	down	Protein of unknown function
ANN03824	-2.01773	0.0035765	33.6471	36.8383	67.3078	10.9689	8.45765	14.4752	down	Similar to X-element\ORF2: Probable RNA-directed DNA polymerase from transposon X-element (Drosophila melanogaster OX%3D7227)
ANN03946	-1.9209	9.51692e-08	161.353	177.643	194.445	64.8993	33.8306	41.013	down	Similar to Nup107: Nuclear pore complex protein Nup107 (Drosophila melanogaster OX%3D7227)
ANN03969	-3.43871	0.0246467	8.41178	24.5589	12.4644	1.82815	0	2.41253	down	Similar to pol: RNA-directed DNA polymerase from mobile element jockey (Drosophila melanogaster OX%3D7227)
ANN03987	-5.48921	0.00271607	16.8236	10.6422	23.6824	0	1.05721	0	down	Similar to PFB0460c: Uncharacterized protein PFB0460c (Plasmodium falciparum (isolate 3D7) OX%3D36329)
ANN04012	-1.23179	0.00533238	532.237	411.771	826.391	163.619	414.425	174.908	down	Protein of unknown function
ANN04014	-2.64796	1.75847e-07	71.1178	200.564	97.2224	22.8519	20.0869	15.6814	down	Protein of unknown function
ANN04125	-1.85795	6.82334e-07	124.647	176.824	124.644	38.3911	33.8306	45.838	down	Similar to ADTRP: Androgen-dependent TFPI-regulating protein (Homo sapiens OX%3D9606)
ANN04156	-1.13047	6.77393e-05	312.765	413.408	468.662	163.619	204.041	177.321	down	Similar to vit-6: Vitellogenin-6 (Oscheius tipulae OX%3D141969)
ANN04178	-5.31245	0.0286295	9.17649	1.63726	12.4644	0	0	0	down	Similar to RTase: Probable RNA-directed DNA polymerase from transposon BS (Drosophila melanogaster OX%3D7227)
ANN04182	-1.26033	0.0181659	113.177	299.618	98.4689	65.8134	77.1761	71.1696	down	Similar to ELOVL: Elongation of very long chain fatty acids protein (Drosophila melanogaster OX%3D7227)
ANN04188	-1.38143	0.0184621	55.8237	77.7698	43.6255	21.0237	22.2013	25.3315	down	Similar to Oxct1: Succinyl-CoA:3-ketoacid coenzyme A transferase 1%2C mitochondrial (Rattus norvegicus OX%3D10116)
ANN04225	-1.02832	0.0012491	250.059	197.29	249.288	131.627	111.007	97.7074	down	Similar to Retrovirus-related Pol polyprotein from type-1 retrotransposable element R2 (Fragment) (Popillia japonica OX%3D7064)
ANN04226	-1.48246	0.00195476	125.412	94.1424	66.0614	40.2193	28.5446	33.7754	down	Similar to ARHGAP20: Rho GTPase-activating protein 20 (Homo sapiens OX%3D9606)
ANN04234	-4.09011	0.0431958	16.0589	8.18629	9.97153	1.82815	0	0	down	Similar to ARHGAP20: Rho GTPase-activating protein 20 (Homo sapiens OX%3D9606)
ANN04239	-1.35816	6.76801e-06	308.177	230.853	226.852	104.205	108.892	85.6447	down	Similar to TMEM181: Transmembrane protein 181 (Homo sapiens OX%3D9606)
ANN04240	-1.48848	3.54291e-05	145.294	241.496	181.98	74.04	53.9175	74.7883	down	Similar to Pgant3: Polypeptide N-acetylgalactosaminyltransferase 3 (Drosophila melanogaster OX%3D7227)
ANN04242	-1.84349	0.01125	45.1178	40.9315	37.3932	5.48445	12.6865	16.8877	down	Similar to FAM120B: Constitutive coactivator of peroxisome proliferator-activated receptor gamma (Bos taurus OX%3D9913)
ANN04264	-4.8029	1.26399e-12	922.238	3101.79	3977.39	79.5245	86.6909	120.626	down	Similar to R1A1-element\ORF2: Putative 115 kDa protein in type-1 retrotransposable element R1DM (Drosophila melanogaster OX%3D7227)
ANN04355	-1.05601	0.000494164	280.648	228.398	270.478	103.29	139.551	132.689	down	Similar to crn: Protein crooked neck (Drosophila melanogaster OX%3D7227)
ANN04359	-1.26701	0.0150003	68.8237	66.309	74.7865	35.6489	22.2013	28.9503	down	Similar to mariner\T: Mariner Mos1 transposase (Drosophila mauritiana OX%3D7226)
ANN04360	-1.21358	0.000122537	373.177	228.398	261.753	117.002	125.808	130.276	down	Protein of unknown function
ANN04361	-1.81216	0.0119098	78.7649	39.2942	36.1468	10.0548	10.5721	24.1253	down	Similar to ELOVL: Elongation of very long chain fatty acids protein (Drosophila melanogaster OX%3D7227)
ANN04440	-1.08181	0.0298803	84.8826	216.937	220.62	94.1497	70.8328	80.8197	down	Similar to dlat-1: Dihydrolipoyllysine-residue acetyltransferase component of pyruvate dehydrogenase complex%2C mitochondrial (Caenorhabditis elegans OX%3D6239)
ANN04466	-7.01027	9.53862e-08	32.1177	123.613	110.933	1.82815	0	0	down	Similar to APOD: Apolipoprotein D (Cavia porcellus OX%3D10141)
ANN04485	-1.42644	0.036965	35.9413	57.3041	49.8577	24.68	15.8581	12.0626	down	Similar to CTH: Cystathionine gamma-lyase (Sus scrofa OX%3D9823)
ANN04513	-1.39235	1.90638e-06	270.707	281.609	271.724	91.4075	89.8626	133.895	down	Similar to LSM12: Protein LSM12 homolog (Gallus gallus OX%3D9031)
ANN04549	-1.27969	0.00243261	134.589	106.422	123.398	33.8208	59.2036	57.9007	down	Protein of unknown function
ANN04573	-1.35892	0.000408971	161.353	192.378	312.857	74.9541	107.835	75.9946	down	Similar to Pnliprp2: Pancreatic lipase-related protein 2 (Rattus norvegicus OX%3D10116)
ANN04594	-2.64959	0.00510982	24.4706	21.2844	34.9004	1.82815	6.34324	4.82505	down	Similar to ndl: Serine protease nudel (Drosophila melanogaster OX%3D7227)
ANN04681	-2.00276	0.0123105	34.4118	31.9265	69.8007	3.6563	13.7437	16.8877	down	Similar to Swip-1: EF-hand domain-containing protein D2 homolog (Drosophila melanogaster OX%3D7227)
ANN04736	-2.46722	0.000452645	42.0589	49.1178	37.3932	7.3126	4.22883	12.0626	down	Similar to R1A1-element\ORF2: Putative 115 kDa protein in type-1 retrotransposable element R1DM (Drosophila melanogaster OX%3D7227)
ANN04844	-1.96882	0.000460256	55.059	82.6816	63.5685	10.0548	17.9725	24.1253	down	Similar to MED4: Mediator of RNA polymerase II transcription subunit 4 (Aedes aegypti OX%3D7159)
ANN04955	-3.49578	0.00192336	29.0589	19.6471	24.9288	0	2.11441	4.82505	down	Similar to Tekt2: Tektin-2 (Rattus norvegicus OX%3D10116)
ANN04990	-1.51586	0.00332681	56.5884	68.7649	86.0045	21.0237	28.5446	24.1253	down	Similar to MKRN2OS: MKRN2 opposite strand protein (Homo sapiens OX%3D9606)
ANN05169	-1.28257	0.015206	100.177	66.309	97.2224	44.7897	21.1441	42.2192	down	Similar to slc23a2: Solute carrier family 23 member 2 (Xenopus tropicalis OX%3D8364)
ANN05194	-4.02989	0.0460742	16.8236	9.82355	7.47865	0	2.11441	0	down	Similar to pol: Retrovirus-related Pol polyprotein from type-2 retrotransposable element R2DM (Drosophila melanogaster OX%3D7227)
ANN05240	-1.0395	0.00504727	594.943	679.462	1209.05	286.105	508.516	412.542	down	Similar to emsy: BRCA2-interacting transcriptional repressor EMSY (Danio rerio OX%3D7955)
ANN05290	-1.30571	0.0247679	58.1178	54.8482	64.815	29.2504	15.8581	26.5378	down	Similar to FBXW5: F-box/WD repeat-containing protein 5 (Homo sapiens OX%3D9606)
ANN05386	-5.59504	0.00789653	9.9412	8.18629	9.97153	0	0	0	down	Protein of unknown function
ANN05400	-2.90618	0.00672006	17.5883	27.0148	32.4075	6.39852	0	3.61879	down	Protein of unknown function
ANN05401	-3.61227	1.56818e-07	61.1766	40.1128	64.815	5.48445	3.17162	4.82505	down	Similar to tc3a: Transposable element Tc3 transposase (Caenorhabditis elegans OX%3D6239)
ANN05489	-3.83217	0.0173808	9.17649	13.0981	22.4359	0.914075	2.11441	0	down	Similar to ALP1: Protein ANTAGONIST OF LIKE HETEROCHROMATIN PROTEIN 1 (Arabidopsis thaliana OX%3D3702)
ANN05492	-1.21332	0.025947	68.8237	100.691	54.8434	27.4222	32.7734	37.3942	down	Similar to Retrovirus-related Pol polyprotein from type-1 retrotransposable element R1 4 (Fragment) (Nasonia vitripennis OX%3D7425)
ANN05613	-3.61299	0.0169673	12.2353	6.54904	34.9004	0	2.11441	2.41253	down	Similar to RTase: Probable RNA-directed DNA polymerase from transposon BS (Drosophila melanogaster OX%3D7227)
ANN05649	-1.05492	0.02376	168.236	177.643	135.862	63.0712	119.464	49.4568	down	Similar to Cog5: Conserved oligomeric Golgi complex subunit 5 (Mus musculus OX%3D10090)
ANN05772	-1.99963	0.00314242	32.1177	57.3041	64.815	11.883	19.0297	7.23758	down	Protein of unknown function
ANN05823	-1.92041	0.00163738	44.353	46.6619	62.3221	15.5393	14.8009	9.65011	down	Protein of unknown function
ANN05846	-1.22247	0.0449929	67.2943	49.9364	44.8719	24.68	23.2585	21.7127	down	Similar to pik-1: Pelle-like serine/threonine-protein kinase pik-1 (Caenorhabditis elegans OX%3D6239)
ANN05870	-3.07615	0.0161598	14.5294	10.6422	28.6682	1.82815	2.11441	2.41253	down	Similar to CLVS1: Clavesin-1 (Homo sapiens OX%3D9606)
ANN05906	-1.24991	7.35283e-06	5057.78	8531.76	8929.51	3861.05	2522.49	3083.21	down	Similar to L-ascorbate oxidase (Cucurbita pepo var. melopepo OX%3D3665)
ANN05910	-1.62327	0.0039642	77.2355	54.0295	52.3505	21.0237	14.8009	24.1253	down	Protein of unknown function
ANN05918	-1.14003	0.000250036	357.883	483.81	392.629	168.19	144.837	248.49	down	Similar to TTPAL: Alpha-tocopherol transfer protein-like (Pongo abelii OX%3D9601)
ANN05922	-1.81229	0.00147028	71.8825	103.966	51.1041	30.1645	12.6865	21.7127	down	Protein of unknown function
ANN05991	-3.19199	0.0233781	18.353	13.0981	14.9573	2.74222	2.11441	0	down	Similar to Tf2-8: Transposon Tf2-8 polyprotein (Schizosaccharomyces pombe (strain 972 / ATCC 24843) OX%3D284812)
ANN06030	-1.39247	4.21009e-06	336.471	402.766	258.013	107.861	119.464	154.402	down	Similar to ACSL4: Long-chain-fatty-acid--CoA ligase 4 (Homo sapiens OX%3D9606)
ANN06116	-1.22416	0.0291481	94.8238	49.1178	86.0045	29.2504	41.2311	27.7441	down	Similar to Tjap1: Tight junction-associated protein 1 (Mus musculus OX%3D10090)
ANN06149	-2.28323	0.0117442	33.6471	22.103	26.1753	3.6563	8.45765	4.82505	down	Protein of unknown function
ANN06220	-2.69481	5.00296e-05	71.8825	35.2011	52.3505	10.9689	8.45765	4.82505	down	Similar to pol: RNA-directed DNA polymerase from mobile element jockey (Drosophila melanogaster OX%3D7227)
ANN06225	-1.29765	0.00161452	123.883	103.966	97.2224	42.9615	38.0594	51.8693	down	Similar to tim: Protein timeless (Drosophila melanogaster OX%3D7227)
ANN06239	-5.73702	0.00476103	10.7059	11.4608	8.72509	0	0	0	down	Similar to pif1: ATP-dependent DNA helicase pif1 (Psychrobacter sp. (strain PRwf-1) OX%3D349106)
ANN06240	-4.10001	0.000737507	13.7647	36.0197	36.1468	4.57037	0	0	down	Protein of unknown function
ANN06254	-3.0754	0.000867344	35.1766	18.8285	41.1326	6.39852	2.11441	2.41253	down	Similar to pol: RNA-directed DNA polymerase from mobile element jockey (Drosophila melanogaster OX%3D7227)
ANN06273	-1.04025	0.00632907	188.883	144.079	160.791	90.4934	90.9198	57.9007	down	Protein of unknown function
ANN06377	-2.78253	0.0314836	13.7647	27.0148	9.97153	1.82815	2.11441	3.61879	down	Similar to Megf8: Multiple epidermal growth factor-like domains protein 8 (Mus musculus OX%3D10090)
ANN06379	-5.34618	0.0229184	3.05883	13.0981	7.47865	0	0	0	down	Similar to Megf8: Multiple epidermal growth factor-like domains protein 8 (Mus musculus OX%3D10090)
ANN06393	-1.66831	0.0149086	38.2354	41.7501	71.0472	19.1956	19.0297	8.44385	down	Similar to MAD2L1: Mitotic spindle assembly checkpoint protein MAD2A (Homo sapiens OX%3D9606)
ANN06401	-6.83144	4.2267e-30	299.765	317.628	344.018	1.82815	0	7.23758	down	Protein of unknown function
ANN06418	-1.22342	0.0123105	78.7649	91.6865	144.587	38.3911	57.0892	38.6004	down	Protein of unknown function
ANN06454	-1.28665	0.0448154	115.471	67.1276	72.2936	42.0474	48.6315	13.2689	down	Similar to Son: Protein Son (Drosophila melanogaster OX%3D7227)
ANN06501	-3.05848	1.68742e-09	69.5884	89.2306	94.7295	10.9689	7.40045	12.0626	down	Similar to Rpp40: Ribonuclease P protein subunit p40 (Rattus norvegicus OX%3D10116)
ANN06613	-1.04173	1.44739e-07	1412.42	1260.69	1366.1	611.516	638.553	712.902	down	Similar to Tctp: Translationally-controlled tumor protein homolog (Plutella xylostella OX%3D51655)
ANN06642	-2.0728	0.00553875	30.5883	71.2208	42.379	19.1956	8.45765	6.03132	down	Similar to wat: Fatty acyl-CoA reductase wat (Drosophila melanogaster OX%3D7227)
ANN06691	-1.71658	0.00504727	45.1178	55.6668	54.8434	21.9378	11.6293	13.2689	down	Similar to POLE4: DNA polymerase epsilon subunit 4 (Homo sapiens OX%3D9606)
ANN06736	-2.08609	0.000327172	54.2942	96.5983	52.3505	10.0548	17.9725	20.5065	down	Protein of unknown function
ANN06776	-1.96964	0.00673513	29.0589	44.206	38.6397	7.3126	10.5721	10.8564	down	Similar to G-protein coupled receptor GRL101 (Lymnaea stagnalis OX%3D6523)
ANN06886	-1.72279	0.00632931	58.8825	45.8432	51.1041	10.0548	13.7437	24.1253	down	Similar to brn: Beta-1%2C3-galactosyltransferase brn (Drosophila melanogaster OX%3D7227)
ANN06942	-2.18486	0.0337956	29.8236	14.7353	22.4359	3.6563	6.34324	4.82505	down	Similar to R1A1-element\ORF2: Putative 115 kDa protein in type-1 retrotransposable element R1DM (Drosophila melanogaster OX%3D7227)
ANN06987	-6.06369	0.00147768	7.64708	16.3726	14.9573	0	0	0	down	Similar to pol: RNA-directed DNA polymerase from mobile element jockey (Drosophila melanogaster OX%3D7227)
ANN06990	-2.70412	0.0268342	27.5295	13.0981	24.9288	7.3126	0	2.41253	down	Similar to Tf2-9: Transposon Tf2-9 polyprotein (Schizosaccharomyces pombe (strain 972 / ATCC 24843) OX%3D284812)
ANN07023	-6.05944	0.00135228	10.7059	15.554	12.4644	0	0	0	down	Protein of unknown function
ANN07052	-1.80006	5.89247e-05	112.412	76.9512	83.5116	24.68	28.5446	25.3315	down	Similar to MANBA: Beta-mannosidase (Homo sapiens OX%3D9606)
ANN07053	-1.81486	0.00224244	61.1766	45.0246	48.6112	14.6252	12.6865	16.8877	down	Similar to MANBA: Beta-mannosidase (Bos taurus OX%3D9913)
ANN07066	-3.40238	0.0001057	52.0001	28.652	27.4217	5.48445	2.11441	2.41253	down	Similar to UGT2B18: UDP-glucuronosyltransferase 2B18 (Macaca fascicularis OX%3D9541)
ANN07136	-1.879	0.000951346	60.4119	72.0394	86.0045	26.5082	8.45765	24.1253	down	Similar to CPIJ007479: DDRGK domain-containing protein 1 (Culex quinquefasciatus OX%3D7176)
ANN07142	-1.76272	0.0033874	77.2355	79.4071	58.5827	16.4533	10.5721	37.3942	down	Protein of unknown function
ANN07147	-1.03779	0.000971879	612.531	1218.12	968.485	471.663	383.766	507.837	down	Similar to ALDH18A1: Delta-1-pyrroline-5-carboxylate synthase (Homo sapiens OX%3D9606)
ANN07183	-1.3547	1.48121e-06	278.354	224.304	251.781	103.29	96.2058	95.2948	down	Similar to U-scoloptoxin(01)-Cw1a (Cormocephalus westwoodi OX%3D1096223)
ANN07188	-1.2052	0.000650395	178.942	130.162	152.066	64.8993	66.604	68.757	down	Protein of unknown function
ANN07191	-1.80783	0.000300192	99.412	296.344	188.213	35.6489	46.5171	85.6447	down	Similar to janA: Sex-regulated protein janus-A (Drosophila pseudoobscura pseudoobscura OX%3D46245)
ANN07299	-7.58838	1.47605e-06	15.2942	30.2893	67.3078	0	0	0	down	Similar to TIE1: Tyrosine-protein kinase receptor Tie-1 (Bos taurus OX%3D9913)
ANN07331	-3.39841	1.54061e-20	240.118	180.098	200.677	20.1096	12.6865	26.5378	down	Protein of unknown function
ANN07332	-2.79557	3.98519e-06	61.1766	50.755	63.5685	9.14075	4.22883	12.0626	down	Similar to pol: Retrovirus-related Pol polyprotein from type-2 retrotransposable element R2DM (Drosophila melanogaster OX%3D7227)
ANN07336	-6.72613	1.90174e-14	146.824	106.422	191.952	0	4.22883	0	down	Similar to X-element\ORF2: Probable RNA-directed DNA polymerase from transposon X-element (Drosophila melanogaster OX%3D7227)
ANN07350	-3.55681	0.0302326	10.7059	31.1079	7.47865	0	4.22883	0	down	Similar to jockey\pol: RNA-directed DNA polymerase from mobile element jockey (Drosophila funebris OX%3D7221)
ANN07395	-1.17953	3.91557e-08	677.531	722.031	720.443	331.809	276.988	326.897	down	Similar to C-1-tetrahydrofolate synthase%2C cytoplasmic (Spodoptera frugiperda OX%3D7108)
ANN07411	-1.48113	0.001695	123.118	78.5884	120.905	37.4771	25.373	53.0756	down	Similar to PPAF2: Phenoloxidase-activating factor 2 (Holotrichia diomphalia OX%3D33394)
ANN07472	-5.2232	0.0294051	4.58825	4.91178	12.4644	0	0	0	down	Protein of unknown function
ANN07476	-2.27313	1.11908e-17	504.707	415.045	468.662	111.517	106.778	67.5508	down	Similar to TCERG1: Transcription elongation regulator 1 (Homo sapiens OX%3D9606)
ANN07489	-1.08447	0.00370359	346.413	503.457	721.69	231.261	324.562	183.352	down	Similar to PPP1R42: Protein phosphatase 1 regulatory subunit 42 (Homo sapiens OX%3D9606)
ANN07571	-1.74204	0.0445254	78.7649	17.1912	59.8292	6.39852	20.0869	20.5065	down	Protein of unknown function
ANN07706	-1.26406	0.00037059	134.589	213.662	195.691	81.3526	69.7756	74.7883	down	Similar to hts: Protein hu-li tai shao (Drosophila melanogaster OX%3D7227)
ANN07707	-1.81435	0.0151234	29.8236	40.9315	42.379	6.39852	11.6293	14.4752	down	Protein of unknown function
ANN07710	-2.39342	3.64979e-05	77.2355	57.3041	68.5543	18.2815	14.8009	4.82505	down	Protein of unknown function
ANN07738	-1.37495	0.000955235	116.236	125.25	144.587	53.0163	63.4324	31.3629	down	Protein of unknown function
ANN07750	-1.96822	0.0115054	62.706	22.9216	57.3363	10.0548	6.34324	20.5065	down	Similar to Klp98A: Kinesin-like protein Klp98A (Drosophila melanogaster OX%3D7227)
ANN07867	-1.13109	0.00087136	208.001	202.201	291.667	128.885	101.492	88.0572	down	Similar to Hibadh: 3-hydroxyisobutyrate dehydrogenase%2C mitochondrial (Mus musculus OX%3D10090)
ANN08004	-2.32379	0.00718438	19.8824	40.9315	69.8007	12.797	2.11441	10.8564	down	Protein of unknown function
ANN08011	-1.09085	0.000600579	245.471	214.481	329.061	135.283	114.178	119.42	down	Similar to a5: Putative odorant-binding protein A5 (Drosophila melanogaster OX%3D7227)
ANN08073	-2.42126	0.0122189	19.8824	30.2893	46.1183	2.74222	12.6865	2.41253	down	Protein of unknown function
ANN08078	-3.87087	0.0118182	13.7647	15.554	17.4502	0.914075	0	2.41253	down	Similar to pol: RNA-directed DNA polymerase from mobile element jockey (Drosophila melanogaster OX%3D7227)
ANN08089	-3.31638	0.00134461	29.0589	26.1961	27.4217	1.82815	6.34324	0	down	Protein of unknown function
ANN08120	-2.99382	0.0337956	29.0589	13.0981	9.97153	0	2.11441	4.82505	down	Similar to LINE-1 reverse transcriptase homolog (Nycticebus coucang OX%3D9470)
ANN08164	-1.22212	0.00476482	120.059	128.525	152.066	38.3911	80.3477	53.0756	down	Similar to ugt3: UDP-glucuronosyltransferase (Fragment) (Pleuronectes platessa OX%3D8262)
ANN08197	-2.59777	0.00306513	20.6471	42.5687	34.9004	2.74222	4.22883	9.65011	down	Protein of unknown function
ANN08229	-2.73751	2.13371e-10	97.1179	143.26	205.663	21.9378	27.4874	16.8877	down	Similar to pol: RNA-directed DNA polymerase from mobile element jockey (Drosophila melanogaster OX%3D7227)
ANN08408	-1.52674	0.000149675	120.059	111.334	110.933	36.563	50.7459	31.3629	down	Similar to R3hcc1l: Coiled-coil domain-containing protein R3HCC1L (Mus musculus OX%3D10090)
ANN08557	-3.42196	2.30225e-05	55.059	40.9315	48.6112	2.74222	10.5721	0	down	Similar to armh3: Armadillo-like helical domain-containing protein 3 (Danio rerio OX%3D7955)
ANN08591	-2.27894	4.76664e-10	371.648	1080.59	970.978	159.963	207.212	131.483	down	Similar to Dnai1: Dynein intermediate chain 1%2C axonemal (Mus musculus OX%3D10090)
ANN08613	-2.15592	0.00191302	35.9413	40.9315	52.3505	5.48445	10.5721	13.2689	down	Protein of unknown function
ANN08645	-1.22619	2.00841e-08	1218.94	1236.95	1566.78	643.509	510.631	563.325	down	Similar to CG5380: Probable DNA-directed RNA polymerase III subunit RPC6 (Drosophila melanogaster OX%3D7227)
ANN08684	-1.63441	0.00265873	59.6472	63.8531	56.0899	23.7659	16.9153	16.8877	down	Similar to pol: RNA-directed DNA polymerase from mobile element jockey (Drosophila melanogaster OX%3D7227)
ANN08736	-1.76842	1.07461e-07	202.648	267.692	299.146	65.8134	101.492	57.9007	down	Protein of unknown function
ANN08768	-2.09291	0.00334114	39.0001	66.309	160.791	34.7348	17.9725	8.44385	down	Similar to Pepck: Phosphoenolpyruvate carboxykinase [GTP] (Drosophila melanogaster OX%3D7227)
ANN08839	-1.4157	0.000322938	161.353	105.603	174.502	44.7897	58.1464	62.7257	down	Protein of unknown function
ANN08891	-1.06468	0.00244322	354.824	216.118	229.345	150.822	108.892	123.039	down	Similar to SELE: E-selectin (Sus scrofa OX%3D9823)
ANN08983	-2.3793	2.81115e-06	80.2943	123.613	198.184	37.4771	26.4302	12.0626	down	Similar to Pepck: Phosphoenolpyruvate carboxykinase [GTP] (Drosophila melanogaster OX%3D7227)
ANN09007	-5.54484	0.0144621	15.2942	9.00492	2.49288	0	0	0	down	Protein of unknown function
ANN09043	-3.89763	0.0144404	16.0589	8.18629	22.4359	0.914075	2.11441	0	down	Protein of unknown function
ANN09048	-1.06791	0.00144644	191.942	215.3	189.459	83.1808	118.407	83.2322	down	Similar to K12H4.7: Putative serine protease K12H4.7 (Caenorhabditis elegans OX%3D6239)
ANN09088	-1.20188	0.0266557	71.1178	93.3238	95.976	56.6726	26.4302	28.9503	down	Similar to Ipo4: Importin-4 (Mus musculus OX%3D10090)
ANN09120	-1.83085	0.00028174	133.059	79.4071	64.815	32.9067	23.2585	21.7127	down	Similar to mtmr10-a: Myotubularin-related protein 10-A (Xenopus laevis OX%3D8355)
ANN09124	-1.149	0.025347	57.3531	94.1424	83.5116	33.8208	37.0022	34.9816	down	Similar to AAEL009908: Glutamyl-tRNA(Gln) amidotransferase subunit B%2C mitochondrial (Aedes aegypti OX%3D7159)
ANN09188	-2.39321	0.0247679	16.8236	31.1079	17.4502	3.6563	6.34324	2.41253	down	Similar to RTase: Probable RNA-directed DNA polymerase from transposon BS (Drosophila melanogaster OX%3D7227)
ANN09195	-1.1112	6.27794e-05	497.06	369.202	353.989	178.245	212.499	174.908	down	Similar to B52: Serine-arginine protein 55 (Drosophila melanogaster OX%3D7227)
ANN09228	-4.65045	4.99072e-27	261.53	414.226	969.731	25.5941	19.0297	20.5065	down	Similar to Retrovirus-related Pol polyprotein from type-1 retrotransposable element R2 (Fragment) (Nasonia vitripennis OX%3D7425)
ANN09349	-1.25564	9.89433e-05	381.589	654.085	580.842	198.354	297.075	180.94	down	Similar to Limd2: LIM domain-containing protein 2 (Mus musculus OX%3D10090)
ANN09351	-1.48184	0.0151177	43.5883	68.7649	61.0756	13.7111	21.1441	27.7441	down	Protein of unknown function
ANN09420	-4.99716	3.87883e-12	84.8826	103.966	72.2936	5.48445	2.11441	0	down	Similar to KPNA3: Importin subunit alpha-4 (Homo sapiens OX%3D9606)
ANN09444	-4.29602	1.7897e-39	944.414	1090.41	1510.69	56.6726	29.6018	95.2948	down	Similar to HEXA: Beta-hexosaminidase subunit alpha (Homo sapiens OX%3D9606)
ANN09446	-4.37288	7.63392e-10	57.3531	69.5835	69.8007	1.82815	4.22883	3.61879	down	Protein of unknown function
ANN09448	-3.37521	2.45645e-17	250.059	310.261	497.33	35.6489	14.8009	51.8693	down	Similar to RTase: Probable RNA-directed DNA polymerase from transposon BS (Drosophila melanogaster OX%3D7227)
ANN09455	-1.40255	0.000401638	177.412	179.28	188.213	95.0638	70.8328	38.6004	down	Similar to TRMT112: Multifunctional methyltransferase subunit TRM112-like protein (Homo sapiens OX%3D9606)
ANN09489	-5.6739	0.00711555	13.7647	10.6422	4.98577	0	0	0	down	Similar to RTase: Probable RNA-directed DNA polymerase from transposon BS (Drosophila melanogaster OX%3D7227)
ANN09504	-6.6979	7.46367e-05	16.0589	17.1912	27.4217	0	0	0	down	Protein of unknown function
ANN09525	-1.58304	0.00892141	53.5295	63.8531	77.2794	33.8208	17.9725	12.0626	down	Protein of unknown function
ANN09594	-2.29782	3.36328e-09	136.883	131.799	198.184	42.0474	26.4302	25.3315	down	Similar to Creg1: Protein CREG1 (Mus musculus OX%3D10090)
ANN09595	-1.19157	0.0001057	209.53	226.76	194.445	100.548	79.2905	96.5011	down	Similar to egal-1: Egalitarian protein homolog (Caenorhabditis elegans OX%3D6239)
ANN09615	-1.57949	0.00347596	69.5884	99.8728	124.644	31.0785	16.9153	50.6631	down	Similar to PEX10: Peroxisome biogenesis factor 10 (Homo sapiens OX%3D9606)
ANN09643	-1.9668	7.29415e-08	241.648	174.368	152.066	62.1571	47.5743	34.9816	down	Similar to GCFC2: GC-rich sequence DNA-binding factor 2 (Homo sapiens OX%3D9606)
ANN09654	-1.65858	0.00036208	128.471	91.6865	125.891	24.68	56.0319	28.9503	down	Similar to bab1: Protein bric-a-brac 1 (Drosophila melanogaster OX%3D7227)
ANN09675	-1.89424	2.23245e-06	182	115.427	188.213	28.3363	47.5743	55.4881	down	Similar to Nca: Neurocalcin homolog (Drosophila melanogaster OX%3D7227)
ANN09678	-1.21456	0.0130115	75.7061	91.6865	82.2651	38.3911	43.3455	25.3315	down	Similar to PINX1: PIN2/TERF1-interacting telomerase inhibitor 1 (Homo sapiens OX%3D9606)
ANN09731	-1.47544	0.00017658	117.765	203.839	194.445	74.04	64.4896	45.838	down	Similar to Clpx: ATP-dependent Clp protease ATP-binding subunit clpX-like%2C mitochondrial (Mus musculus OX%3D10090)
ANN09732	-1.34686	9.06732e-11	1180.71	971.713	1007.12	454.295	404.91	382.386	down	Protein of unknown function
ANN09734	-1.10006	0.01804	139.177	170.275	180.734	84.0949	104.663	38.6004	down	Protein of unknown function
ANN09795	-2.46361	2.58525e-07	82.5884	130.162	86.0045	21.9378	10.5721	21.7127	down	Protein of unknown function
ANN09847	-1.45162	0.0409227	62.706	29.4707	56.0899	16.4533	12.6865	25.3315	down	Protein of unknown function
ANN09934	-2.13633	3.38093e-06	96.3532	83.5002	82.2651	21.9378	13.7437	24.1253	down	Similar to Manf: Mesencephalic astrocyte-derived neurotrophic factor homolog (Drosophila simulans OX%3D7240)
ANN09937	-1.1312	0.00271888	240.883	153.084	181.98	74.04	112.064	77.2009	down	Similar to Wdr47: WD repeat-containing protein 47 (Mus musculus OX%3D10090)
ANN09963	-1.12159	0.0127701	77.2355	112.971	99.7153	43.8756	42.2883	47.0443	down	Similar to Elp2: Probable elongator complex protein 2 (Drosophila melanogaster OX%3D7227)
ANN10004	-3.37286	0.0174453	18.353	16.3726	19.9431	0	5.28603	0	down	Similar to pol: Retrovirus-related Pol polyprotein from type-2 retrotransposable element R2DM (Drosophila melanogaster OX%3D7227)
ANN10029	-1.15177	0.000627657	175.883	177.643	150.819	65.8134	82.4621	79.6134	down	Similar to nudt21: Cleavage and polyadenylation specificity factor subunit 5 (Xenopus laevis OX%3D8355)
ANN10075	-2.08448	8.67785e-05	67.2943	82.6816	97.2224	9.14075	23.2585	26.5378	down	Similar to CPM: Carboxypeptidase M (Homo sapiens OX%3D9606)
ANN10117	-3.66369	0.000940902	22.1765	19.6471	37.3932	1.82815	4.22883	0	down	Similar to RTase: Probable RNA-directed DNA polymerase from transposon BS (Drosophila melanogaster OX%3D7227)
ANN10426	-6.94561	2.29613e-05	17.5883	19.6471	34.9004	0	0	0	down	Similar to RTase: Probable RNA-directed DNA polymerase from transposon BS (Drosophila melanogaster OX%3D7227)
ANN10441	-1.24523	0.0446606	65.7649	58.1227	38.6397	23.7659	21.1441	24.1253	down	Similar to letmd1: LETM1 domain-containing protein 1 (Xenopus tropicalis OX%3D8364)
ANN10468	-1.72834	0.000362451	133.059	93.3238	98.4689	50.2741	27.4874	19.3002	down	Protein of unknown function
ANN10477	-1.02488	0.0229184	171.295	191.559	105.948	102.376	67.6612	60.3132	down	Similar to slc39a1: Zinc transporter ZIP1 (Danio rerio OX%3D7955)
ANN10564	-1.41418	0.0285982	52.7648	46.6619	37.3932	15.5393	16.9153	19.3002	down	Protein of unknown function
ANN10635	-1.21614	0.0030547	123.883	119.52	109.687	53.9304	37.0022	61.5194	down	Similar to Tollip: Toll-interacting protein (Rattus norvegicus OX%3D10116)
ANN10636	-1.53549	0.00405409	86.412	47.4805	81.0187	26.5082	23.2585	24.1253	down	Protein of unknown function
ANN10734	-1.10476	0.044684	75.7061	68.7649	61.0756	37.4771	23.2585	34.9816	down	Similar to Rep: Rab proteins geranylgeranyltransferase component A (Drosophila melanogaster OX%3D7227)
ANN10954	-2.99542	0.000494164	55.059	26.1961	24.9288	6.39852	3.17162	3.61879	down	Similar to melk: Maternal embryonic leucine zipper kinase (Danio rerio OX%3D7955)
ANN11045	-5.49244	0.0189185	1.52942	14.7353	9.97153	0	0	0	down	Similar to Retrovirus-related Pol polyprotein from type-1 retrotransposable element R1 (Fragment) (Bradysia coprophila OX%3D38358)
ANN11047	-1.54603	0.00704543	48.1766	52.3923	58.5827	18.2815	17.9725	18.094	down	Similar to nrf-6: Nose resistant to fluoxetine protein 6 (Caenorhabditis elegans OX%3D6239)
ANN11148	-3.47467	0.0160747	15.2942	16.3726	14.9573	1.82815	0	2.41253	down	Similar to X-element\ORF2: Probable RNA-directed DNA polymerase from transposon X-element (Drosophila melanogaster OX%3D7227)
ANN11194	-1.428	0.000987478	90.2355	81.0443	97.2224	31.9926	32.7734	34.9816	down	Similar to CG1218: Histone PARylation factor 1-like (Drosophila melanogaster OX%3D7227)
ANN11252	-3.4305	0.000555784	16.8236	36.8383	44.8719	5.48445	3.17162	0	down	Protein of unknown function
ANN11276	-1.09128	3.00814e-06	3446.54	4468.9	5486.84	1952.46	2042.52	2294.31	down	Similar to Venom carboxylesterase-6 (Apis mellifera OX%3D7460)
ANN11345	-2.21159	4.36625e-14	292.118	295.525	260.506	78.6104	52.8603	50.6631	down	Similar to Ank2: Ankyrin-2 (Mus musculus OX%3D10090)
ANN11450	-2.25926	0.00231673	61.9413	25.3775	48.6112	6.39852	14.8009	7.23758	down	Similar to ChT: High-affinity choline transporter 1 (Drosophila melanogaster OX%3D7227)
ANN11473	-2.72049	2.04532e-11	159.059	139.167	138.355	11.883	26.4302	28.9503	down	Similar to NUB1: NEDD8 ultimate buster 1 (Homo sapiens OX%3D9606)
ANN11476	-1.17604	0.02376	74.9414	62.2158	66.0614	31.0785	26.4302	32.5691	down	Similar to Gyc88E: Soluble guanylate cyclase 88E (Drosophila melanogaster OX%3D7227)
ANN11761	-2.10071	0.00981918	41.2942	35.2011	32.4075	14.6252	3.17162	7.23758	down	Similar to POL: Retrovirus-related Pol polyprotein from transposon 412 (Drosophila melanogaster OX%3D7227)
ANN11872	-1.09452	0.00189098	280.648	185.01	178.241	89.5793	104.663	108.564	down	Protein of unknown function
ANN11873	-1.09876	0.000154329	523.06	366.746	360.222	166.362	201.926	217.127	down	Similar to Prothoracicostatic peptide (Bombyx mori OX%3D7091)
ANN11920	-1.60858	1.44739e-07	469.531	278.334	431.269	141.682	143.78	100.12	down	Similar to RTase: Probable RNA-directed DNA polymerase from transposon BS (Drosophila melanogaster OX%3D7227)
ANN11940	-2.48899	0.00180582	33.6471	42.5687	39.8861	1.82815	7.40045	12.0626	down	Similar to tc3a: Transposable element Tc3 transposase (Caenorhabditis elegans OX%3D6239)
ANN11969	-6.30199	2.25902e-06	35.1766	49.1178	82.2651	0	2.11441	0	down	Similar to TY3B-I: Transposon Ty3-I Gag-Pol polyprotein (Saccharomyces cerevisiae (strain ATCC 204508 / S288c) OX%3D559292)
ANN12004	-3.46874	0.00486208	21.4118	27.8334	24.9288	0	0	7.23758	down	Protein of unknown function
ANN12020	-1.24896	0.000109381	256.942	203.02	324.075	127.056	104.663	96.5011	down	Protein of unknown function
ANN12216	-5.61131	0.00960874	8.41178	4.09315	16.2037	0	0	0	down	Similar to ERCC6: Chimeric ERCC6-PGBD3 protein (Homo sapiens OX%3D9606)
ANN12223	-5.64295	0.00785278	10.7059	13.0981	4.98577	0	0	0	down	Similar to pol: RNA-directed DNA polymerase from mobile element jockey (Drosophila melanogaster OX%3D7227)
ANN12243	-1.13635	0.0216968	72.6472	155.54	104.701	57.5867	46.5171	47.0443	down	Similar to Cyp4ac2: Probable cytochrome P450 4ac2 (Drosophila melanogaster OX%3D7227)
ANN12244	-2.50771	0.0045862	39.7648	48.2991	13.7109	4.57037	5.28603	8.44385	down	Similar to glc-2: Glutamate-gated chloride channel subunit beta (Caenorhabditis elegans OX%3D6239)
ANN12277	-3.40472	5.28274e-22	234.765	286.52	274.217	14.6252	38.0594	22.919	down	Protein of unknown function
ANN12285	-3.19063	0.0311783	7.64708	23.7403	14.9573	2.74222	2.11441	0	down	Similar to PRPSAP1: Phosphoribosyl pyrophosphate synthase-associated protein 1 (Bos taurus OX%3D9913)
ANN12293	-2.17414	0.00485474	21.4118	37.657	59.8292	9.14075	8.45765	8.44385	down	Similar to pol: RNA-directed DNA polymerase from mobile element jockey (Drosophila melanogaster OX%3D7227)
ANN12312	-1.83793	2.52503e-06	390.766	1205.84	1307.52	306.215	276.988	227.984	down	Similar to Gpdh: Glycerol-3-phosphate dehydrogenase [NAD(+)]%2C cytoplasmic (Drosophila melanogaster OX%3D7227)
ANN12331	-2.7078	0.0156702	17.5883	24.5589	24.9288	3.6563	6.34324	0	down	Protein of unknown function
ANN12510	-3.67466	0.00933333	10.7059	27.8334	14.9573	1.82815	0	2.41253	down	Similar to K02A2.6: Uncharacterized protein K02A2.6 (Caenorhabditis elegans OX%3D6239)
ANN12529	-1.34413	0.0077721	88.7061	180.917	220.62	61.243	90.9198	39.8067	down	Similar to CG11899: Probable phosphoserine aminotransferase (Drosophila melanogaster OX%3D7227)
ANN12550	-1.96757	0.000147774	94.0591	49.1178	107.194	21.0237	22.2013	20.5065	down	Similar to ints13: Integrator complex subunit 13 (Xenopus tropicalis OX%3D8364)
ANN12575	-4.92899	0.0209527	7.64708	4.91178	22.4359	0	1.05721	0	down	Similar to Retrovirus-related Pol polyprotein from type-1 retrotransposable element R1 2 (Fragment) (Nasonia vitripennis OX%3D7425)
ANN12578	-1.31061	1.47487e-08	773.12	754.776	764.069	247.714	363.679	313.629	down	Protein of unknown function
ANN12579	-1.70422	9.61815e-10	435.883	302.893	366.454	92.3215	124.75	123.039	down	Similar to APN2: Aminopeptidase N (Manduca sexta OX%3D7130)
ANN12587	-1.33821	1.18672e-07	368.589	392.942	456.198	146.252	152.238	183.352	down	Similar to ATIC: Bifunctional purine biosynthesis protein ATIC (Gallus gallus OX%3D9031)
ANN12594	-2.29854	0.0482348	6.11766	17.1912	81.0187	7.3126	6.34324	7.23758	down	Protein of unknown function
ANN12669	-2.07331	2.06286e-08	251.589	284.883	290.421	101.462	58.1464	34.9816	down	Protein of unknown function
ANN12730	-5.52741	0.0132518	3.05883	11.4608	12.4644	0	0	0	down	Similar to RTase: Probable RNA-directed DNA polymerase from transposon BS (Drosophila melanogaster OX%3D7227)
ANN12742	-2.223	0.0251154	21.4118	13.9167	52.3505	7.3126	7.40045	3.61879	down	Similar to mlst8: Target of rapamycin complex subunit lst8 (Danio rerio OX%3D7955)
ANN12760	-5.13157	0.0458024	4.58825	13.0981	2.49288	0	0	0	down	Protein of unknown function
ANN12765	-1.67031	0.000173889	80.2943	114.608	117.165	33.8208	23.2585	41.013	down	Similar to GALK1: Galactokinase (Homo sapiens OX%3D9606)
ANN12766	-2.48051	1.20562e-08	86.412	120.339	105.948	14.6252	20.0869	21.7127	down	Similar to Dnaaf5: Dynein assembly factor 5%2C axonemal (Mus musculus OX%3D10090)
ANN12767	-1.90553	0.000836299	45.1178	57.3041	73.54	18.2815	13.7437	14.4752	down	Protein of unknown function
ANN12785	-1.14077	0.046472	64.2354	74.4953	148.327	39.3052	35.945	54.2819	down	Similar to GA18292: Ubiquitin thioesterase OTU1 (Drosophila pseudoobscura pseudoobscura OX%3D46245)
ANN12799	-1.95929	0.00172643	55.8237	47.4805	42.379	14.6252	8.45765	14.4752	down	Similar to ELAC1: Zinc phosphodiesterase ELAC protein 1 (Bos taurus OX%3D9913)
ANN12855	-1.16507	0.000189487	239.354	313.535	352.743	144.424	106.778	151.989	down	Similar to GSPT1: Eukaryotic peptide chain release factor GTP-binding subunit ERF3A (Homo sapiens OX%3D9606)
ANN12929	-1.93602	0.0209994	26.0001	27.8334	37.3932	10.9689	5.28603	7.23758	down	Protein of unknown function
ANN13065	-1.03174	0.0334238	87.1767	87.5933	86.0045	53.0163	41.2311	32.5691	down	Similar to Uba3: Nedd8-activating enzyme E1 catalytic subunit (Drosophila melanogaster OX%3D7227)
ANN13089	-5.93704	0.00504727	3.05883	5.73041	27.4217	0	0	0	down	Protein of unknown function
ANN13148	-1.37364	0.0287802	81.059	69.5835	34.9004	29.2504	23.2585	19.3002	down	Similar to ANPEP: Aminopeptidase N (Bos taurus OX%3D9913)
ANN13213	-1.17545	0.0264013	67.2943	108.059	77.2794	25.5941	41.2311	45.838	down	Similar to Queuosine salvage protein (Bos taurus OX%3D9913)
ANN13294	-2.412	2.30028e-05	44.353	76.1325	109.687	11.883	19.0297	12.0626	down	Similar to R1A1-element\ORF2: Putative 115 kDa protein in type-1 retrotransposable element R1DM (Drosophila melanogaster OX%3D7227)
ANN13361	-7.05207	1.23639e-05	16.8236	27.0148	33.6539	0	0	0	down	Similar to X-element\ORF2: Probable RNA-directed DNA polymerase from transposon X-element (Drosophila melanogaster OX%3D7227)
ANN13381	-1.45671	0.000122937	140.706	139.167	103.455	48.446	42.2883	49.4568	down	Protein of unknown function
ANN13446	-2.38916	0.000621573	61.1766	28.652	54.8434	5.48445	12.6865	9.65011	down	Similar to GVQW3: Protein GVQW3 (Homo sapiens OX%3D9606)
ANN13468	-1.76166	7.02712e-05	84.8826	135.892	154.559	41.1334	44.4027	24.1253	down	Similar to pol: RNA-directed DNA polymerase from mobile element jockey (Drosophila melanogaster OX%3D7227)
ANN13572	-5.97394	1.17716e-05	30.5883	39.2942	64.815	0	0	2.41253	down	Similar to pol: Retrovirus-related Pol polyprotein from type-2 retrotransposable element R2DM (Drosophila melanogaster OX%3D7227)
ANN13598	-1.27428	0.0243918	70.3531	82.6816	48.6112	23.7659	35.945	24.1253	down	Similar to dph1: 2-(3-amino-3-carboxypropyl)histidine synthase subunit 1 (Xenopus laevis OX%3D8355)
ANN13601	-2.95577	5.89692e-09	78.0002	132.618	159.545	25.5941	13.7437	7.23758	down	Similar to Dmxl1: DmX-like protein 1 (Mus musculus OX%3D10090)
ANN13641	-1.8028	0.0117025	52.0001	49.1178	24.9288	13.7111	10.5721	12.0626	down	Similar to GGPS1: Geranylgeranyl pyrophosphate synthase (Bos taurus OX%3D9913)
ANN13692	-1.94392	0.0299476	28.2942	48.2991	23.6824	15.5393	5.28603	4.82505	down	Similar to ASH1L: Histone-lysine N-methyltransferase ASH1L (Homo sapiens OX%3D9606)
ANN13718	-3.69779	0.0397353	25.2354	27.0148	0	1.82815	2.11441	0	down	Similar to Tf2-6: Transposon Tf2-6 polyprotein (Schizosaccharomyces pombe (strain 972 / ATCC 24843) OX%3D284812)
ANN13746	-1.98836	0.000331636	78.0002	49.9364	61.0756	12.797	14.8009	20.5065	down	Similar to cpe: Carboxypeptidase E (Lophius americanus OX%3D8073)
ANN13775	-3.87863	0.000186537	56.5884	7.36766	62.3221	1.82815	2.11441	4.82505	down	Similar to RTase: Probable RNA-directed DNA polymerase from transposon BS (Drosophila melanogaster OX%3D7227)
ANN13801	-1.11774	2.54185e-06	441.236	409.315	479.88	192.87	212.499	207.477	down	Similar to COPE: Coatomer subunit epsilon (Pongo abelii OX%3D9601)
ANN13820	-4.04761	0.00109154	26.0001	19.6471	22.4359	1.82815	2.11441	0	down	Protein of unknown function
ANN13831	-5.53774	0.0161023	13	1.63726	12.4644	0	0	0	down	Similar to svr: Carboxypeptidase D (Drosophila melanogaster OX%3D7227)
ANN13856	-4.23392	5.62005e-07	54.2942	47.4805	37.3932	1.82815	1.05721	4.82505	down	Similar to mariner\T: Mariner Mos1 transposase (Drosophila mauritiana OX%3D7226)
ANN13877	-2.23554	0.0464548	13	24.5589	24.9288	7.3126	3.17162	2.41253	down	Similar to SLC17A5: Sialin (Homo sapiens OX%3D9606)
ANN13981	-1.71779	0.0123232	33.6471	43.3874	52.3505	17.3674	10.5721	10.8564	down	Similar to xdhA: Probable D-xylulose reductase A (Aspergillus clavatus (strain ATCC 1007 / CBS 513.65 / DSM 816 / NCTC 3887 / NRRL 1) OX%3D344612)
ANN14078	-4.70639	0.0151664	6.11766	4.91178	42.379	1.82815	0	0	down	Similar to RTase: Probable RNA-directed DNA polymerase from transposon BS (Drosophila melanogaster OX%3D7227)
ANN14089	-1.47663	0.00919161	99.412	47.4805	134.616	28.3363	43.3455	28.9503	down	Similar to Gld: Glucose dehydrogenase [FAD%2C quinone] (Drosophila pseudoobscura pseudoobscura OX%3D46245)
ANN14113	-5.71252	0.00544914	13	9.82355	7.47865	0	0	0	down	Similar to Retrovirus-related Pol polyprotein from type-1 retrotransposable element R1 (Fragment) (Bradysia coprophila OX%3D38358)
ANN14298	-1.40245	0.0240403	54.2942	58.1227	39.8861	23.7659	16.9153	16.8877	down	Similar to PBRM1: Protein polybromo-1 (Homo sapiens OX%3D9606)
ANN14314	-3.18366	0.0256063	18.353	9.82355	18.6966	1.82815	3.17162	0	down	Similar to Rilpl: RILP-like protein homolog (Drosophila melanogaster OX%3D7227)
ANN14333	-1.02179	3.86591e-08	5685.6	5532.3	6608.63	3127.05	2820.63	2829.89	down	Protein of unknown function
ANN14395	-1.53173	0.0432005	38.2354	31.1079	33.6539	11.883	10.5721	13.2689	down	Protein of unknown function
ANN14448	-1.03917	0.0214617	125.412	164.545	186.966	110.603	67.6612	51.8693	down	Similar to Csnk2b: Casein kinase II subunit beta (Rattus norvegicus OX%3D10116)
ANN14474	-6.41687	0.000311317	16.8236	10.6422	22.4359	0	0	0	down	Similar to X-element\ORF2: Probable RNA-directed DNA polymerase from transposon X-element (Drosophila melanogaster OX%3D7227)
ANN14475	-6.05731	0.00212771	6.11766	8.18629	24.9288	0	0	0	down	Protein of unknown function
ANN14480	-1.2293	0.00370359	161.353	124.432	137.109	62.1571	38.0594	80.8197	down	Similar to Fen1: Flap endonuclease 1 (Aedes aegypti OX%3D7159)
ANN14516	-1.71994	0.0441862	38.2354	18.0098	46.1183	12.797	10.5721	7.23758	down	Protein of unknown function
ANN14610	-2.05294	0.02376	29.8236	22.103	27.4217	5.48445	4.22883	9.65011	down	Protein of unknown function
ANN14653	-5.57666	0.0180214	14.5294	0.818629	12.4644	0	0	0	down	Similar to RTase: Probable RNA-directed DNA polymerase from transposon BS (Drosophila melanogaster OX%3D7227)
ANN14737	-5.26166	0.0271535	12.2353	4.91178	4.98577	0	0	0	down	Similar to LINE-1 reverse transcriptase homolog (Nycticebus coucang OX%3D9470)
ANN14761	-2.92314	1.40741e-07	97.1179	67.1276	204.416	11.883	10.5721	26.5378	down	Similar to Picot: Putative inorganic phosphate cotransporter (Drosophila melanogaster OX%3D7227)
ANN14764	-1.94002	1.64813e-09	355.589	239.04	441.24	100.548	68.7184	100.12	down	Similar to Picot: Putative inorganic phosphate cotransporter (Drosophila ananassae OX%3D7217)
ANN14773	-1.79915	0.0462895	38.2354	36.0197	23.6824	13.7111	11.6293	2.41253	down	Similar to pol: RNA-directed DNA polymerase from mobile element jockey (Drosophila melanogaster OX%3D7227)
ANN14835	-3.39195	0.0174453	13	21.2844	21.1895	0	5.28603	0	down	Protein of unknown function
ANN14836	-1.84394	0.00399365	59.6472	66.309	89.7438	7.3126	34.8878	18.094	down	Protein of unknown function
ANN14857	-2.90332	2.80295e-05	29.0589	54.8482	66.0614	6.39852	6.34324	7.23758	down	Similar to BAIAP3: BAI1-associated protein 3 (Homo sapiens OX%3D9606)
ANN14871	-1.37782	1.43694e-09	519.237	521.467	587.074	195.612	233.643	196.621	down	Protein of unknown function
ANN14882	-1.8621	1.25339e-08	177.412	173.549	256.767	54.8445	53.9175	57.9007	down	Similar to AAEL006169: Lysosomal aspartic protease (Aedes aegypti OX%3D7159)
ANN15072	-2.04856	0.0126785	24.4706	47.4805	54.8434	12.797	14.8009	2.41253	down	Protein of unknown function
ANN15154	-2.05228	0.018463	32.1177	31.1079	41.1326	1.82815	10.5721	13.2689	down	Protein of unknown function
ANN15192	-1.40118	0.00866387	231.706	86.7747	87.2509	52.1023	44.4027	57.9007	down	Protein of unknown function
ANN15209	-5.7784	0.00463126	15.2942	6.54904	9.97153	0	0	0	down	Similar to FAM200A: Protein FAM200A (Macaca fascicularis OX%3D9541)
ANN15441	-1.10866	0.0265896	112.412	81.0443	73.54	32.9067	40.1738	51.8693	down	Similar to Zbtb41: Zinc finger and BTB domain-containing protein 41 (Mus musculus OX%3D10090)
ANN15454	-1.40971	0.00330253	100.177	108.059	61.0756	30.1645	37.0022	34.9816	down	Similar to DUS1L: tRNA-dihydrouridine(16/17) synthase [NAD(P)(+)]-like (Homo sapiens OX%3D9606)
ANN15478	-1.02997	0.000432611	296.707	395.398	451.212	170.018	180.782	208.684	down	Similar to tmem11: Transmembrane protein 11%2C mitochondrial (Danio rerio OX%3D7955)
ANN15503	-1.37262	0.0152032	91.0002	51.5737	59.8292	21.0237	26.4302	31.3629	down	Protein of unknown function
ANN15519	-6.84879	3.20478e-05	19.8824	27.0148	19.9431	0	0	0	down	Protein of unknown function
ANN15539	-3.79866	0.00718438	918.414	41.7501	842.594	42.0474	38.0594	49.4568	down	Similar to HSP70B2: Heat shock protein 70 B2 (Anopheles albimanus OX%3D7167)
ANN15596	-4.75353	4.67915e-12	75.7061	80.2257	94.7295	4.57037	4.22883	0	down	Similar to X-element\ORF2: Probable RNA-directed DNA polymerase from transposon X-element (Drosophila melanogaster OX%3D7227)
ANN15624	-1.12226	0.00329194	165.942	219.393	223.113	74.04	76.1189	130.276	down	Protein of unknown function
ANN15644	-1.35758	1.55742e-10	3402.95	4486.09	3973.66	1827.24	1363.8	1436.66	down	Similar to ubq-1: Polyubiquitin-A (Caenorhabditis elegans OX%3D6239)
ANN15646	-2.36297	0.0105688	42.8236	24.5589	18.6966	3.6563	8.45765	4.82505	down	Similar to Retrovirus-related Pol polyprotein from type-1 retrotransposable element R2 (Fragment) (Nasonia vitripennis OX%3D7425)
ANN15783	-5.39781	0.02376	1.52942	13.0981	9.97153	0	0	0	down	Similar to Retrovirus-related Pol polyprotein from type-1 retrotransposable element R2 (Fragment) (Nasonia vitripennis OX%3D7425)
ANN15866	-2.38499	1.07093e-11	149.883	145.716	194.445	27.4222	33.8306	32.5691	down	Protein of unknown function
ANN15974	-2.3289	6.20253e-18	815.943	618.884	759.083	118.83	201.926	115.801	down	Protein of unknown function
ANN16033	-3.59968	1.60083e-07	35.1766	125.25	184.473	5.48445	4.22883	19.3002	down	Similar to CPD: Carboxypeptidase D (Fragment) (Lophonetta specularioides OX%3D75873)
ANN16076	-1.38014	0.0342546	44.353	42.5687	44.8719	14.6252	16.9153	19.3002	down	Similar to CPD: Carboxypeptidase D (Fragment) (Lophonetta specularioides OX%3D75873)
ANN16131	-1.38887	0.042284	100.941	42.5687	41.1326	21.0237	20.0869	30.1566	down	Similar to AGL: Glycogen debranching enzyme (Equus caballus OX%3D9796)
ANN16181	-5.81668	0.00376596	9.17649	14.7353	8.72509	0	0	0	down	Protein of unknown function
ANN16234	-1.27502	5.84233e-08	1062.94	716.301	856.305	352.833	379.537	357.054	down	Similar to CPM: Carboxypeptidase M (Homo sapiens OX%3D9606)
ANN16274	-6.39823	0.000320094	13.7647	13.0981	22.4359	0	0	0	down	Similar to pol: RNA-directed DNA polymerase from mobile element jockey (Drosophila melanogaster OX%3D7227)
ANN16375	-4.59961	6.00045e-31	235.53	223.486	226.852	9.14075	8.45765	10.8564	down	Similar to LINE-1 reverse transcriptase homolog (Nycticebus coucang OX%3D9470)
ANN16400	-2.30808	2.73651e-07	165.177	123.613	153.312	35.6489	11.6293	42.2192	down	Similar to atad1b: ATPase family AAA domain-containing protein 1-B (Danio rerio OX%3D7955)
ANN16456	-4.23323	0.00551288	197.295	347.917	287.928	1.82815	4.22883	38.6004	down	Similar to Vg: Vitellogenin (Apis mellifera OX%3D7460)
ANN16457	-5.71799	0.000834072	1723.65	1042.12	1396.01	3.6563	2.11441	73.5821	down	Similar to VG2: Vitellogenin-2 (Periplaneta americana OX%3D6978)
ANN16458	-4.84352	0.00298565	286.765	400.31	420.051	0	15.8581	22.919	down	Similar to VG2: Vitellogenin-2 (Periplaneta americana OX%3D6978)
ANN16482	-5.5071	4.28612e-06	1192.94	1826.36	2481.66	11.883	10.5721	98.9136	down	Similar to VG2: Vitellogenin-1 (Periplaneta americana OX%3D6978)
ANN16483	-6.70809	1.05644e-18	445.06	952.885	968.485	6.39852	2.11441	14.4752	down	Similar to Vg: Vitellogenin (Apis mellifera OX%3D7460)
ANN16484	-6.09973	2.64231e-08	1592.89	1190.29	1946.94	5.48445	8.45765	55.4881	down	Similar to VG2: Vitellogenin-2 (Periplaneta americana OX%3D6978)
ANN16486	-6.12951	1.03063e-13	3555.13	3777.97	9394.43	33.8208	56.0319	149.577	down	Similar to VG2: Vitellogenin-1 (Periplaneta americana OX%3D6978)
ANN16487	-4.21998	1.27319e-06	261.53	516.555	517.273	8.22667	14.8009	47.0443	down	Similar to Vg: Vitellogenin (Apis mellifera OX%3D7460)
ANN16528	-2.02004	1.04221e-05	288.295	99.8728	154.559	34.7348	44.4027	55.4881	down	Similar to suz12: Polycomb protein suz12 (Xenopus tropicalis OX%3D8364)
ANN16584	-1.54232	0.0122031	58.1178	45.0246	88.4973	29.2504	22.2013	13.2689	down	Protein of unknown function
ANN16586	-1.5824	0.000666266	159.059	69.5835	149.573	37.4771	46.5171	42.2192	down	Protein of unknown function
ANN16635	-3.52221	3.70266e-10	123.118	127.706	102.208	1.82815	8.45765	21.7127	down	Similar to TY3B-I: Transposon Ty3-I Gag-Pol polyprotein (Saccharomyces cerevisiae (strain ATCC 204508 / S288c) OX%3D559292)
ANN16653	-1.16151	0.000121128	250.824	218.574	211.895	116.087	94.0914	94.0886	down	Similar to tmx3: Protein disulfide-isomerase TMX3 (Xenopus laevis OX%3D8355)
ANN16660	-1.33434	0.000455127	568.178	249.682	398.861	212.979	139.551	129.07	down	Similar to X-element\ORF2: Probable RNA-directed DNA polymerase from transposon X-element (Drosophila melanogaster OX%3D7227)
ANN16744	-4.82488	0.00759606	34.4118	4.09315	18.6966	1.82815	0	0	down	Similar to AAEL006169: Lysosomal aspartic protease (Aedes aegypti OX%3D7159)
ANN16806	-4.09014	6.05505e-11	76.4708	90.0492	124.644	5.48445	0	12.0626	down	Similar to CFDP2: Craniofacial development protein 2 (Bos taurus OX%3D9913)
ANN16816	-5.0714	0.00115526	13.7647	31.1079	24.9288	0.914075	1.05721	0	down	Similar to R1A1-element\ORF2: Putative 115 kDa protein in type-1 retrotransposable element R1DM (Drosophila melanogaster OX%3D7227)
ANN16881	-1.45908	0.00511157	152.177	124.432	142.094	89.5793	26.4302	34.9816	down	Similar to SOD1: Superoxide dismutase [Cu-Zn] (Hylobates lar OX%3D9580)
ANN16984	-1.82045	0.0129327	56.5884	44.206	42.379	17.3674	19.0297	3.61879	down	Similar to ZNF471: Zinc finger protein 471 (Homo sapiens OX%3D9606)
ANN16995	-1.93575	8.04179e-05	68.8237	110.515	83.5116	21.9378	15.8581	31.3629	down	Similar to selenbp1-b: Methanethiol oxidase (Xenopus laevis OX%3D8355)
ANN17014	-2.04635	7.35933e-07	105.53	144.079	209.402	29.2504	33.8306	48.2505	down	Protein of unknown function
ANN17031	-2.07929	2.59139e-08	130	119.52	117.165	29.2504	27.4874	30.1566	down	Similar to gadl1: Acidic amino acid decarboxylase GADL1 (Fragment) (Xenopus tropicalis OX%3D8364)
ANN17075	-2.1486	0.000464396	45.1178	51.5737	54.8434	12.797	13.7437	7.23758	down	Similar to Ac76E: Adenylate cyclase type 2 (Drosophila melanogaster OX%3D7227)
ANN17223	-5.97687	2.83555e-23	261.53	246.407	139.601	5.48445	4.22883	0	down	Similar to X-element\ORF2: Probable RNA-directed DNA polymerase from transposon X-element (Drosophila melanogaster OX%3D7227)
ANN17232	-3.00614	0.006724	22.9412	19.6471	27.4217	0	4.22883	4.82505	down	Protein of unknown function
ANN17234	-3.45909	0.000188482	47.4119	36.0197	27.4217	7.3126	0	2.41253	down	Similar to jockey\pol: RNA-directed DNA polymerase from mobile element jockey (Drosophila funebris OX%3D7221)
ANN17285	-2.68289	0.000300665	39.7648	39.2942	39.8861	7.3126	8.45765	2.41253	down	Similar to K02A2.6: Uncharacterized protein K02A2.6 (Caenorhabditis elegans OX%3D6239)
ANN17287	-7.14663	1.55275e-08	78.7649	65.4904	150.819	1.82815	0	0	down	Similar to F52C9.6: Putative uncharacterized transposon-derived protein F52C9.6 (Caenorhabditis elegans OX%3D6239)
ANN17305	-5.46583	0.0148758	6.11766	4.91178	14.9573	0	0	0	down	Similar to Tf2-11: Transposon Tf2-11 polyprotein (Schizosaccharomyces pombe (strain 972 / ATCC 24843) OX%3D284812)
ANN17321	-1.46468	0.00207209	114.706	68.7649	148.327	32.9067	40.1738	47.0443	down	Protein of unknown function
ANN17461	-2.99943	0.00882979	25.2354	22.9216	21.1895	1.82815	0	7.23758	down	Similar to Pol: LINE-1 retrotransposable element ORF2 protein (Mus musculus OX%3D10090)
ANN17472	-1.33825	0.000315041	240.883	227.579	269.231	74.04	71.89	147.164	down	Protein of unknown function
ANN17484	-3.33989	6.09326e-05	31.353	31.1079	57.3363	2.74222	2.11441	7.23758	down	Similar to GVQW3: Protein GVQW3 (Homo sapiens OX%3D9606)
ANN17529	-1.5982	0.0473585	33.6471	42.5687	57.3363	19.1956	4.22883	20.5065	down	Protein of unknown function
ANN17543	-1.56865	0.000173889	104	141.623	128.383	57.5867	34.8878	32.5691	down	Similar to Non1: Nucleolar GTP-binding protein 1 (Drosophila melanogaster OX%3D7227)
ANN17556	-5.17386	0.042284	2.29412	4.09315	14.9573	0	0	0	down	Protein of unknown function
ANN17560	-1.48725	2.69241e-14	1266.36	1297.53	1333.69	508.226	404.91	476.474	down	Similar to Vha55: V-type proton ATPase subunit B (Drosophila melanogaster OX%3D7227)
ANN17587	-1.47213	8.36411e-09	874.061	740.86	997.153	360.145	349.935	229.19	down	Similar to SERINC3: Serine incorporator 3 (Pongo abelii OX%3D9601)
ANN17600	-2.05665	0.0205474	19.1177	54.8482	38.6397	6.39852	4.22883	16.8877	down	Protein of unknown function
ANN17624	-2.6729	0.0170543	9.9412	17.1912	53.597	5.48445	2.11441	4.82505	down	Protein of unknown function
ANN17772	-1.08124	0.000460557	217.942	320.903	253.028	132.541	117.35	124.245	down	Similar to chmp3: Charged multivesicular body protein 3 (Xenopus laevis OX%3D8355)
ANN17812	-2.23084	2.17234e-08	187.353	166.182	159.545	54.8445	33.8306	19.3002	down	Protein of unknown function
ANN17860	-1.53146	0.0113455	75.7061	36.0197	88.4973	24.68	20.0869	24.1253	down	Similar to Octopamine receptor (Bombyx mori OX%3D7091)
ANN17919	-2.4609	0.0345044	10.7059	49.1178	31.161	0	8.45765	8.44385	down	Protein of unknown function
ANN17935	-4.5457	1.34389e-26	185.059	196.471	236.824	6.39852	7.40045	13.2689	down	Similar to Sult1d1: Sulfotransferase 1 family member D1 (Mus musculus OX%3D10090)
ANN17968	-2.04261	0.0199003	16.0589	51.5737	31.161	8.22667	8.45765	7.23758	down	Similar to K02A2.6: Uncharacterized protein K02A2.6 (Caenorhabditis elegans OX%3D6239)
ANN17986	-1.22341	0.00932321	87.1767	71.2208	100.962	31.0785	40.1738	39.8067	down	Similar to LMAN2L: VIP36-like protein (Pongo abelii OX%3D9601)
ANN17987	-2.26762	0.0115054	18.353	29.4707	39.8861	3.6563	7.40045	7.23758	down	Similar to jockey\pol: RNA-directed DNA polymerase from mobile element jockey (Drosophila funebris OX%3D7221)
ANN18014	-4.33323	0.0213138	10.7059	17.1912	185.72	1.82815	6.34324	2.41253	down	Protein of unknown function
ANN18080	-1.55364	0.00504727	44.353	113.789	105.948	27.4222	27.4874	34.9816	down	Similar to SMC4: Structural maintenance of chromosomes protein 4 (Homo sapiens OX%3D9606)
ANN18164	-1.83729	0.0144191	31.353	28.652	52.3505	11.883	9.51486	9.65011	down	Similar to X-element\ORF2: Probable RNA-directed DNA polymerase from transposon X-element (Drosophila melanogaster OX%3D7227)
ANN18224	-1.2443	0.0227223	53.5295	76.1325	79.7723	23.7659	27.4874	37.3942	down	Similar to Eif5b: Eukaryotic translation initiation factor 5B (Mus musculus OX%3D10090)
ANN18227	-1.54831	0.000784003	115.471	151.446	88.4973	53.9304	25.373	42.2192	down	Similar to Eif5b: Eukaryotic translation initiation factor 5B (Mus musculus OX%3D10090)
ANN18343	-5.13269	0.0359808	7.64708	4.09315	8.72509	0	0	0	down	Similar to X-element\ORF2: Probable RNA-directed DNA polymerase from transposon X-element (Drosophila melanogaster OX%3D7227)
ANN18375	-3.35757	0.032305	16.8236	6.54904	19.9431	1.82815	0	2.41253	down	Similar to PGBD4: PiggyBac transposable element-derived protein 4 (Homo sapiens OX%3D9606)
ANN18384	-2.0724	6.15783e-05	79.5296	76.1325	93.4831	13.7111	13.7437	32.5691	down	Protein of unknown function
ANN18448	-1.16249	0.00203747	199.589	159.633	267.985	81.3526	78.2333	120.626	down	Protein of unknown function
ANN18453	-1.57811	1.25676e-05	120.824	132.618	158.298	44.7897	42.2883	50.6631	down	Similar to Ugt8: 2-hydroxyacylsphingosine 1-beta-galactosyltransferase (Mus musculus OX%3D10090)
ANN18481	-1.01736	0.0251861	202.648	103.966	123.398	60.3289	78.2333	74.7883	down	Similar to LTA4: Leucine aminopeptidase 2-2 (Scheffersomyces stipitis (strain ATCC 58785 / CBS 6054 / NBRC 10063 / NRRL Y-11545) OX%3D322104)
ANN18487	-2.41521	0.00144656	38.2354	55.6668	81.0187	21.9378	7.40045	2.41253	down	Similar to AAEL004607: Adenylyltransferase and sulfurtransferase MOCS3 (Aedes aegypti OX%3D7159)
ANN18494	-1.70975	0.0455646	39.7648	24.5589	37.3932	14.6252	4.22883	12.0626	down	Similar to X-element\ORF2: Probable RNA-directed DNA polymerase from transposon X-element (Drosophila melanogaster OX%3D7227)
ANN18505	-1.17675	0.0479278	64.2354	48.2991	61.0756	21.0237	31.7162	24.1253	down	Protein of unknown function
ANN18540	-5.05909	0.04409	6.11766	8.18629	4.98577	0	0	0	down	Similar to PIF1: ATP-dependent DNA helicase PIF1 (Candida albicans (strain SC5314 / ATCC MYA-2876) OX%3D237561)
ANN18593	-1.33422	1.61302e-07	533.001	505.913	594.553	166.362	230.471	252.109	down	Similar to RTase: Probable RNA-directed DNA polymerase from transposon BS (Drosophila melanogaster OX%3D7227)
ANN18601	-3.49878	0.00238204	29.0589	17.1912	23.6824	3.6563	0	2.41253	down	Similar to Hsd17b4: Peroxisomal multifunctional enzyme type 2 (Mus musculus OX%3D10090)
ANN18645	-6.18814	4.2643e-32	241.648	344.643	320.335	7.3126	2.11441	2.41253	down	Protein of unknown function
ANN18665	-1.25465	0.00730352	96.3532	129.343	100.962	29.2504	61.318	47.0443	down	Similar to bgm: Very long-chain-fatty-acid--CoA ligase bubblegum (Drosophila melanogaster OX%3D7227)
ANN18817	-5.74049	0.00907806	12.2353	1.63726	17.4502	0	0	0	down	Protein of unknown function
ANN18843	-2.05013	0.0001803	91.7649	52.3923	68.5543	21.0237	19.0297	10.8564	down	Similar to Retrovirus-related Pol polyprotein from type-1 retrotransposable element R1 (Fragment) (Bradysia coprophila OX%3D38358)
ANN18850	-1.38232	4.19936e-07	1244.94	1230.4	1905.81	542.96	697.756	437.874	down	Protein of unknown function
ANN18911	-2.79385	5.39963e-05	33.6471	58.1227	93.4831	14.6252	4.22883	7.23758	down	Similar to CYP4C1: Cytochrome P450 4C1 (Blaberus discoidalis OX%3D6981)
ANN18928	-5.55384	0.00944765	10.7059	9.00492	7.47865	0	0	0	down	Similar to X-element\ORF2: Probable RNA-directed DNA polymerase from transposon X-element (Drosophila melanogaster OX%3D7227)
ANN18933	-2.10118	0.00148523	30.5883	100.691	193.198	30.1645	25.373	19.3002	down	Similar to CYP4C1: Cytochrome P450 4C1 (Blaberus discoidalis OX%3D6981)
ANN18983	-2.32049	0.0384656	9.17649	31.1079	34.9004	1.82815	8.45765	4.82505	down	Protein of unknown function
ANN18998	-3.87541	2.29357e-32	410.648	257.05	345.264	22.8519	23.2585	22.919	down	Similar to Rich: Guanine nucleotide exchange factor subunit Rich (Drosophila melanogaster OX%3D7227)
ANN19074	-4.02818	0.0400289	7.64708	15.554	12.4644	0	0	2.41253	down	Similar to CCNQ: Cyclin-Q (Homo sapiens OX%3D9606)
ANN19111	-2.75579	6.68771e-26	522.295	424.869	466.169	83.1808	72.9473	51.8693	down	Similar to RTase: Probable RNA-directed DNA polymerase from transposon BS (Drosophila melanogaster OX%3D7227)
ANN19121	-3.6429	0.0209182	13	4.09315	36.1468	1.82815	0	2.41253	down	Protein of unknown function
ANN19137	-1.10566	0.0012241	282.942	206.295	300.392	150.822	122.636	91.676	down	Similar to BTBD9: BTB/POZ domain-containing protein 9 (Drosophila melanogaster OX%3D7227)
ANN19224	-1.15425	0.00420112	113.177	169.456	150.819	52.1023	61.318	82.0259	down	Similar to TAZ: Tafazzin (Gorilla gorilla gorilla OX%3D9595)
ANN19246	-1.85616	0.0194949	29.0589	25.3775	49.8577	8.22667	8.45765	12.0626	down	Similar to BTBD9: BTB/POZ domain-containing protein 9 (Homo sapiens OX%3D9606)
ANN19308	-2.85479	0.036965	16.0589	31.1079	4.98577	2.74222	2.11441	2.41253	down	Similar to ZAN: Zonadhesin (Homo sapiens OX%3D9606)
ANN19555	-1.04177	0.0200444	97.1179	209.569	181.98	85.0089	69.7756	82.0259	down	Similar to Prat: Amidophosphoribosyltransferase (Drosophila melanogaster OX%3D7227)
ANN19564	-1.32678	0.00198268	132.294	120.339	115.919	48.446	31.7162	67.5508	down	Similar to Phgdh: D-3-phosphoglycerate dehydrogenase (Rattus norvegicus OX%3D10116)
ANN19599	-1.61086	8.67785e-05	158.294	122.794	93.4831	48.446	38.0594	36.1879	down	Similar to XKR4: XK-related protein 4 (Homo sapiens OX%3D9606)
ANN19611	-2.27997	0.00149281	52.0001	97.4169	109.687	9.14075	39.1166	4.82505	down	Similar to X-element\ORF2: Probable RNA-directed DNA polymerase from transposon X-element (Drosophila melanogaster OX%3D7227)
ANN19735	-4.5987	1.17662e-13	65.0002	117.883	122.151	4.57037	3.17162	4.82505	down	Similar to flz: Serine protease filzig (Drosophila melanogaster OX%3D7227)
ANN19922	-1.50107	0.0125371	59.6472	61.3972	74.7865	28.3363	10.5721	30.1566	down	Similar to bckd-1A: 2-oxoisovalerate dehydrogenase subunit alpha%2C mitochondrial (Caenorhabditis elegans OX%3D6239)
ANN19929	-1.20056	0.00255349	144.53	113.789	172.009	47.5319	68.7184	71.1696	down	Protein of unknown function
ANN19947	-2.80418	5.51921e-06	67.2943	60.5786	93.4831	12.797	2.11441	16.8877	down	Similar to BBS2: Bardet-Biedl syndrome 2 protein (Homo sapiens OX%3D9606)
ANN19983	-6.81896	8.03677e-05	38.2354	18.0098	8.72509	0	0	0	down	Similar to pol: RNA-directed DNA polymerase from mobile element jockey (Drosophila melanogaster OX%3D7227)

## Sheet: Sheet5
	Scaffold_4	7840879	7841081	202			>Scaffold_4:7840879	1		>Scaffold_6:40266631	20
	Scaffold_10	16023707	16023909	202			GTTGTTGTTGTTGTTGTAGCCAGCTTGGCTAAAGCTGGAGGGGTGAGTGATGGTCTCCAGCCAACTTTATTTTAAAGTTGGCTCGTCCTGAACCACATATTTCTATGTGCGATCAACCATCATGAGGACTTGGACTTTTCTTTATAAGCCATTAAACCCTTAGGAAACTGCAAGCTAGCCTGGCTTGTAAGGGTTGGCTAGT	2		CACGTAAATTGGTTTGTTTATTTTTTACAATTTACAGGACAAAATTTTTACTCTACATAAAACAATGATCTCGAGTAATAAATAGTATAAAATAAAAGCATTATAAAAACAAAATATTAATTTGACAAAATGTCCAAAATAGTTATAAAGGATAACAAAATATCCAAAATAGGTATTGGTAGATAACAAAAGTTTTAAAGAAGGTATATAACTATTATTGCGATGTTTATGACTTTTAACGGGACTTTCAAGTCCTATTTGGGCTGTATTGAAGTAAAAGTTATTATTTTATTATATTTGTGTTAACCCGGGATCAGTACGGTTCGGTTTTGTAACGTATCCAGTACACGGTAACGTGAGAGAAATCTCTCACAACCGTACTGATTGCGTGTTAATCAT…	32759
	Scaffold_6	4008604	4008807	203			>Scaffold_10:16023707	1		ATCACACAAAAAATTAAACCACAAAAAACAGTTAATTCCTTTTGACGTAAACAAAAGCTCATAACATAAAATAACAATTTTTTATCGTTTGAAAAAAGAAAGAAAAAAAACTACATTGTAAAGAATCGCTTCGCTTATGCTATCACTTAACAAGC	155
	Scaffold_13	2948219	2948424	205			GGTTGGTTTTTATTTTTTCAGGCCGCGGTAAGAAACAGAACTACGGTCATGCGGCCCTCTGGTCTGCGGGCACGCTGGCCGCTCTCGCGTTTGCGGCCCTGGCCGCTCTATCCGGCAAGGCCCTCATCACCTCGATACTAGCCCTTCTGCTCGCCGCGATCTGCGCCTTCAAAGGACACCACGGGCACGGCGGCGGCTACGG	2		>Scaffold_4:46460245	20
	Scaffold_5	20647330	20647535	205			>Scaffold_6:4008604	1		TGGCAGCACCTCCAACACCTTTTCCCACCGGCCACGCCTGCTAGACACCATTATTCACATTGATATATCTTCCATGAATAAACAGAATCTGGAAGAAGAGATAGAAGAGAGAGGACGAGCAGATCAAGAAGAAGAGGAACACCAGGAAGTAAGATAGATTCCCACAAGTGCAGCACTTACCCAGCCGGAGGAATACCTCTCATAACTTGGTGTTGGGGGACCTGCTGGAGTCTTCACCTGAGCTCTCGTGTGTACCTTCAGTCTTCTCCTCTGCATTCTCCGTCAATTATCAACTACACTTGCACTTGCGTTTAATTTATCAGCTACAATCGTTTTTTCATTCAATTTATCAACTTCACTTGCATTTAATTTATCAGCTACAGTCGTTTTTTCATTCAA…	32759
	Scaffold_2	26038046	26038251	205			CTCTGAGCGCCAAGCCTACTTTTTTTTCACGTATATGCTCAGGCCAAGGGTGTTTTGAGCAATTTCACTGTCAAGCGCCGCGTGTATCTTTGAGAATACACCCATGTCCTATCCCCACAACGCCGCGTGTATTCTTGAGAATACATTTGAGAGGCTAATGTTCAGAACTTCAGTGTGTTCCGAAAAATACACGTATATCGGAG	2		CGAGTACCTCAGGGTTACGAATAAGACCCAAGTTCTGTGTCATGAGGAGGTGGGTCGACTCTATGCCTGGTTCAATGAGATGCTGCCTCGACCCCGCGTGACACGCCCCTGAGAGTGATGGATAGTAGAGTTGGGGTCGAGTACCTCAGGGTTACGAATTGGACCCAAGTTCTGTGTCATGAGGAGGTGGGTCGACTCTACACCTGGTTCAATGAGCTGCTGCCTCGACCCCGCGTGACACGTATATATTATT	253
	Scaffold_3	28049839	28050045	206			>Scaffold_13:2948219	1		>Scaffold_6:4474236	19
	Scaffold_2	21269292	21269499	207			GGTCTACTCCCTGTTTATAGTCCCCCAGCCAGACTATCTCCTTGTAATAATAATTCCGAGTCCGTGAGATATGCACTGAGCACTGATACTACCTCACAAAATAGGATCCAAAATTTTGAGTCAGTGCTACTCATTAAAAACAATGCCCAAATCAAAACTCAATCTCATCTTATGTATTTCAAAAACAAAAGTCTCTTAATTTCGG	2		GAAATAATGCATGCAAGATTACCTAAATTTAAACAATTTTTTTTCTTCTTATCGCATAGATAATAATGTAATGTATTTTCATTTCATTCAACCTTTTGATTGGGCTTATGTTACTTCAACGTAAGTCGATATCTCGAATTTGGACAAGAGTTTAGAATTTAAGGGACTCGGAAAAGTGTTTCTATTGGTTTTTAAGAGGATCCAGACAGTTGGGCAGCATCCGGATAGGCGGTGTCATCCCCCTCCTCGTAGTTCGCAGTATCCTCGTTCGATTCTCGTCCTAGGCGAGGAGTAAATGCCGTGTCAGAGACGCGTCGAAGCGACAGATTCGGCAGACCTGAAATAACGGAAATTAAAGTATTATTGCACATTGCATACTTGAATAATTGTCAGGCGCTC…	32759
	Scaffold_4	37660908	37661115	207			>Scaffold_5:20647330	1		GGAAACTCAAAAACCAGCGTACTAAAATTAACCTCACCCAGCTGGGGATATTTCGGGTTTTATTCTTCCTCTATTCAGATAAAATTGACCATGCAGTTGAAAGCGACGTTAAACCAAAAAAAAAAAAAAAAAAAAAAAACAAATTCTAAGTGTCTTTTCCTTACCTAGGACTAATAAATATTAAGTGTCTTTTCCTTACCTAGGACTATCTGTGTCGAGGTGAGAACCAACGTGGCGAAGGTGACTAACACAAAACTCAACGTCAGCTCGGCGTCTCGCGACATGACACGGAGAATTTCCGCGAGATGTTTTTTTCTTTCAAAATGAGAAAAACCTCACTGACAGGCAAAACGCGAGTTGCTGAAAGTCCGTCGG	375
	Scaffold_4	36463784	36463992	208			ACGGTCAATATTTTTTTAATTATCAAAAAAATCTGATGGAATATTTTATTCATACCTGTATCTGACCTGTTGTAACACCAACAACTTATGGTTTTTTTGGGGCTAATACCATCTGTAAATTGAGTTATATCAGATACTATTGGTATCACAATACACATAATTATTATTCATGTAAGCCCCTGAAAGACTGCCTTGATAATGTAAG	2		>Scaffold_12:3263349	20
	Scaffold_3	50612223	50612431	208			>Scaffold_2:26038046	1		GTTAATTTTAATTTTTCTTCAGTGAAATTCTCCATTCTTTCCCCGTGTTCCATTTAATTTCGAACATCAGGGTTGTATTCCATTAAATCATAGTTTTGTCCTAATTTTGACAGAAGGTTTAGAATGGAGTTCTACAAAAGCCAGGTAAGAAAACATTTCAAGAAAGACCATCAGATTTCAGGGATCTAGGTATTCAATTTTCAGTGAGAAACTGGAACCACACACCCAATAGGTGTGCAAGAAAGACCATCCAACACCTATCAATAACATTACTCCATACGCTTGATAGGCAAGCAAGGAAATTTGTGCAGCCATTTAGAATTTGCCAGTGGATAAGATAGATAGCCTCTGTGGCATTATGGTTGTGACTACTTCTCGTAGTCTAGAGTTCCCAAGTCT…	32759
	Scaffold_4	18851191	18851400	209			GAAGAACTTGGTGAAAGTAAGAAAACAACGAAACAAACAAGTAATCAGAGGGTCTTCGATTTATACAATTCGCCAAGAACCGATCTTACCATTGTGGAATCAATTGCAGCCCGTATAAAGCCATGTTTGGGGTTCCTACCAAAATTGGTTTGAAAAAAATTAATCAATACCTGATGCTCTGGAAAATGTTTCAAGTTGGTGGAAC	2		AGGCGCTTACAGTATGAACCCTGTGAAGGTGGTGTTTTATTATTATATATATACTAAAGAGGAGGGGCCCTCTCGTAGAACCTATATAGACCTGTGAAGGTGTGTGTCATATTTTTTATATTTAATTTGTACCATTATTTGTCTGTATATGATATTTCTACTAATAAAGAGTTCTAAAAAATAAATAAAATAAGACTACCATATTTTTTTTTTTTTTTGTAAGTGTGCCCCGGAACCGCTTCTCGCATTACTTCAGGCAAGTTTACCTTTACATCCATACCATTCCGAAACAAAAAAAATACGGTCAGAAAGTTTCCGCTCCGGCCGGATCGAACCCGCAAACCTCCGGGTCAGTACTATATGTCTTAACCACTGAGCCACTAGGTCGGCAAGACTACC…	663
	Scaffold_4	48451079	48451288	209			>Scaffold_3:28049839	1		>Scaffold_1:46323040	20
	Scaffold_5	18132166	18132376	210			CCCAATTCTGCGCAATTAATGGCAAAAGTAAAGTTGATCGCCATTTGAAAAAGGTAAATGATAAGAAGATGAATTTTTTACCAAAGTATTTGTAAATTAAAGACCGTTTCAAAAATTTACCGCAAGAGGGGGTTCGTATTTTAAAACATGAACTTGGCCCCGACATGGTCCTGTCCGAATCTTTAAATATTACCCCAGTTTGCCGT	2		GGTACTTCCTGCAGGTGCTCGAGTCCCACAAGGAGGGCTCGGAGATCATCCTGCAGAAGGACGGCTCGTGGTCTGCCTTCACACCGCCCAAGGACGAGCCCAAAGCCGCCACCGCCGCCATCGGGGACCTGAGCATCGTGTGTCTGGACGATGAGGAGGCGCCCCCCGCCCCCACCTCCGTGATCAAGAGCCCCCCACCACAGGGCGACGTGAAGCCGGGGGGCGTGTCCATCCCCCTGCCGCCTCCCACTACCGCGCCCCCTCCTCCGCCCCCCGAGATAGAAGAGATCTGCTTGGATTAACTCTTTGACTGCCATGGCACAACTCGAGTTGTGTCAGTACACTTTCCCCCCATGTCAAGATTAGCTCTCTGGCAGTCAAAGAGTTAAAAGATCAGGT…	32759
	Scaffold_8	21582646	21582856	210			>Scaffold_2:21269292	1		GGACTATTGGCTCAAGACAGGGAGTGATATTATGTTTACATACAAGAGCATAGATAGGAAATTTATATTCAGATTTGTTTGTTTTATTAAGAGTTTTTACCAACAAGGAACTGCAGAGAAACTATTAACTATTAAGAGAATTACCAACAAGGAACTGCAGTGGCTGATATTGCAGATTTTTTTGGGGTCAATTTAGGGGGTATGGGGGTGTCCATTCTTGTCATTTCCACTGTGACAAGTCAGGCATACATAGTAGGGCCTAGTGCTTTCTTTAGGTTTCGAATATTGGCTCAAGACAGGGAGTAATATTATGTTTACATACAAGAGCATAGATGGGAAATTTATATTCAGATTTGTTTGTTTTATTAAGAGTTTAATGTCGTTTTTCAACTGCATGGT…	919
	Scaffold_4	38641129	38641340	211			AGCCGTTTGCCCGTGCTTTGCAACGGGACTAAATTTCAAATTTACTAAGGCATGGCCGTACTGCTGGACAGCAATGCCTTTTTAAACTTTTTATAATTTTTCTGGACAAAGCGATAATGGTTTTGGGGGGGTCAATTCTGAGACATTTTTCGCTATCTCTTACCGTTTTGGCTAAACAACTCCGGACAAACAAACATAGGTAGGTAG	2		>Scaffold_1:49847646	20
	Scaffold_9	20479298	20479509	211			>Scaffold_4:37660908	1		AAAAAAAAACACTACACCGGTGCCGTCTAATTCCTTCGCCGCCGCACCCTCGAAATCCTCCAGGCGTTGGGCTCCTCGTACTTGTTGTACAGCGGCTCCAGCCTCTGGTTCTTCTTGAACTTGCTGAGCTTGGTGGGGTCACTGAACTTGAAGAAGGCGGGCGCGAACTCCACCAGCCACTTGGGGTCGCAGCTGGTCACCTCTCGCATGTACTCCTTCGTGGTCTGCACCAGCTCGTGGTAGATCACCCTGTGGGCGGGACACATAACAATTTTATTTTATTTATTTATTTACTGGCTGGGTGACTAAAAACAGGGAGTAGACCAGCAGTCTAGCTGGGGGACTATAAACAGTGAGTAGACCCAGCAGTCTAGCTGGGGGACTATAAACAATGAGTAG…	32759
	Scaffold_4	36045842	36046053	211			AAGTTCCCAAAAGATTCATTATGTTTCTTGTGCAACATTGATGACAATTTTCTGGTGAGTTTGTTGAGCAGTGTTTTATCCTGGGAGTTTCTGTTTGTCTTTCATCTCCTTCTTATGCGCCGTTTTTCTGCTATCAGGTCTCGTATTTCTTTTGGAATGTTTATAATTTCTTCTTTTTGTTTGTTTTCAGGTGTTGCGAAATGAGCT	2		TTATGAACTCAGCTGAAATAAAACAAAGGTATAATCAGACATGAATAATTAAAAGTGAATTGAACTGGGTAGGTACTATAGATTTTTTTTCAATATCTGTTATGGTTTACAAGATGGTTGACATTGAAGATTCTGAGGAAACAAGTTAATAATTAAAAATTGAACTTCTATGTGTGTTTTGAACAAATAAAGGATTATTTGTAGAATTAAAAGTACTGACTATTCCAGCTCAATATGTTATACTACAAATTGAACATATTACAAACAACATTACATATTAGCTGGCAATACACATACATATTCCACGAGATTTGCATCCTCTGGTAATATAGTGATACCTCACTGCCACAAGTCTAAGACAAGAGATTCACCAATATTGCCATCAGACTTTACAACTAA…	1026
	Scaffold_7	4216798	4217009	211			>Scaffold_4:36463784	1		>Scaffold_4:47741608	20
	Scaffold_5	2091711	2091923	212			GCTTGCAAATTTTTTATCTGGAAACTAATTTCTTTGAGAAAAAATTCTGGACCGAACATGTATTGAACCTGTAACCTCGGGATCAAAAAGCGATTTCGCTATCCCTAGACCAATGATGCTGGCATAGACTCACCTGATTATCCATCTTTAAGTATTCTATGGAACTCACCATTGTAACCTCATACGTTTGGCTTAGTTATAACCTCTA	2		GTTGTAAGTTATCAGTTATTTACGACCTTGCGTGACCATATTGACCATTGCATCACCTTTCTGGATGCAGTGGAGCTTTTGGTGCATTCATTTGTGATCAGCAAGTTCTACAGGTTTGTTTGTTCCCTGTTCAATTTTATTGAACTGAAAAATGGAAGGATTTCTATTGAGTGTCTTACTTGATGTACTTTGGATATCAACTTCTCGAAAGTCTGGCGTAGAACTTGGCTTTCATCGCGTGAGTCTTCTTCCATTTCTTATTTAATAACTAAAATCACATTTTATAATTATTACTTCCAAAAGTTTAAACACCTACTTTACAGAACACAGTACTCAAAAAAATATAAGCTTTGAGACAGATTTAGGTCTACTATTTGAGGTTAGGTTTGTTTCAATTTC…	32759
	Scaffold_2	28042178	28042391	213			>Scaffold_3:50612223	1		GATAATTAATTTAAATTTGTTCATTTTTTTTAAATAAAAAAATGTAGGTACTCTTCTATTTTTTGTCTAAACCTCACCCATCCTAGGTTTACTTATAAAGATTAATAGCCTTACTTATAAAGATTCACCCTTTTAAGATTTACAAATATTATTATTAGGTTGGGCTAGAAATGTCAGCCTTACATGTTCAGATAGAACAGATTTTTTTTTACAAAATTCTGCCAAACCCTGGATCAACCTTGGGAACTCTGGACCATGGGCAGTATTCACAAGTGTTACATCACGGAGGCTGATCCTTACCTTGTGGCAATTTAATAGCTGCATCAGGACCTTTGACTTTCCTCTTCTTCTTTCCAACTCGGGTTGGGATTGGTGGTTCATACTTCTTCTTCTTGTCCT…	1048
	Scaffold_1	46914652	46914865	213			CCTTAACATGTGGTCGCTACTCGAATTAAGTCAATTCCTGGTTGAAATGCCCTTTTTTGGCGTGGGTGTGTATATTACTTCCTAGAAATTTCTAATATTAGAAATCGGAAGTACATATTGTGTTCGTTTTTGTAAAAAGAAAAAAATATTTTTAATAATGTCTTGGCGAATCGGGTGCAACCCGCCGCTAGTAGAATAATTGAATGCC	2		>Scaffold_1:42375718	20
	Scaffold_3	14631324	14631538	214			>Scaffold_4:18851191	1		CTTTGAAATACGCATCTGGATCTGTTAAACATAACCTAACGTAAGATAAAACCCACCAAACGTGACCAAACTGTAAAAATCAAAACTGAAATTTTTTGAGAGAATACTATTTACTCTACATAACATTTCTAGTTTGCCATTTCTCAGAAGAAAGAGTAAGTGAACTCATTGTTCCATTTGTTCCGCTGAACCCTGAAAACTCCTGCTCGTTTCAGTTTTCTTTAAATTGTTTTACGCTCGGACTTCTGTGAAGGGATTCCTTCAAAAATCGATCAAATATTGGAGAAGGAAAACAATAATTTCAGAATTCATAGTAGTAGCCAGAATATAAACACGCCTGTATCTCTGAAGTTACTTCCAACAGTTCTTTCCACTCTCTAGTTAACTTCTACAATGAGT…	32759
	Scaffold_13	19007228	19007443	215			AACGAGATACGGTACATTGAATTCGCGAACGCTAAAATCTTTTTTGGTAGGTACTTCATACGTACGTACATGTGCGTTTGTTTATGTTGTGAGATATAATTAATAAATTCAAAAATACTTTATATTTATGATCGAATAAAATGTGTAAACACTCCAATATCTTCTTGCTGCTTTAGAATTATAATATTTGTTTTATATTTTAATATCCG	2		TATACATAAAATGTACTATCCGTTTTGAATTCTCTACGCAGATGTAAACAGGGGCTGTATGGCGATCGGCCTCACCATTTTGGCTAATAAGGACAACAAGACAGTGGGATACGCCTACGGTTACAACGCCTTGTAAGTGCTCATTATTTTTAATATTATTATTATTATTTATTACAAAGTAAAATAACTATAGAAATAATGCAGAGGAAGAGAAAAATGTTAAGTAAAAATAGACGTAGGTTATTATTATGTCCAAACTAAAGAGCGGGGATCTTACATCCTGAAGTCTTTAACAAATGTTTTTTTTTTATGAAATTTTGTATGTATGTTGGCTATATCCTGATATCTTCATTATTATTTTTATGCGACATTGGCCAACACGAGACCACTTAAAGGTCC…	1412
	Scaffold_4	49004234	49004449	215			>Scaffold_4:48451079	1		>Scaffold_4:11623464	20
	Scaffold_2	35096306	35096521	215			GTGTAAAATGACGTGGTGGAGAAGATATACATTTATATCACTCCAGTTTTTCTGAAGCACCTACTAAGTGCTCTGCTATCTTCCCCAAAGTGACACCCAGAGCATATTCTGACTTAAATTCGGATTGAATGTAACACGGTGATAAGAGCACATGCTGTGCTTTTCCACCCAACCCGGATTAAGATCACCGTGTTCCAGGCAATCCGAAT	2		TTTTCTGTGTTGGTTATTTTCTAATGGTAATTTTTGTCTCTCGATTCTAATCCGCCTGTGGATTCTGTCAAGTTCAAGAACCGGTTCCTGTAGAAGGCAGGCATATTTACGTGTACTTTGGGTGCCTTGAAAATGGTTGTTTGAGTTGAAGATCGCCAGTTAGAGTTCCTAAGCTCTCGCTATGAAGATCATTAGTGTGGTGTTTTTTATATGTGTGACAGTGAGTGTGGTGGACCAGAGTGTCGCACAGGAGGAGGAGTGTGACTGCACGGTGTACTACCTGTGTGACGCCGCCAATACCGTGTCCAGGTAATTATTTTTGGTGTATTTTCAGAGAGAAAAAGAAAAAAGGGTTGGTTGGAAGAGATTGCCACAGGCAATAATCCCGCCCTTTAGGTA…	32759
	Scaffold_11	19614500	19614716	216			>Scaffold_5:18132166	1		ACGGGGAGGATAGCGACCATAGTGACTGCTACGCCAGCGGCTGGGGCAAGGACGCTTGGGGTAACATTTCTATTCACATCTAAAGAAGGTTCATTTTTCTTTAGATGTGAAAAAAATAAGACATTTTTCTGAATATGTTTAATATATGTAAAAAAGAAAAGAAAAATCAATCAATTAATGTTTAAAAACACGATAAAATATAATATTTTGTATATGATTAACGAAAAATAAGTAAAAAAAAGGTTCATTAGAAAGAAGTTATCATATTTGTGTTGATCTCGATGTCCTTGTTATAAGTAGGGCTGTTGGCTACGAAAGTTATTTGTCACTGCGGGCTTAAATGGATCTTTTGTGACATCACGTTGTGATACCTAAATCTTTACTGAACTATACCTAAAT…	1774
	Scaffold_7	36074858	36075076	218			ATGTTTTGACTACATTGTTTTACCAGATTGTGTGAAATATGTTTATGAATCACAATGATGCATCCTATTTACCATCTGCTTGCCTGTCACTCAAAAGATAGCAGGTTTGAAAGTCCAGTTTCAACTGGACATTGCAGATGGATTTTTATTTCTTTTAATTTCTCATGTGATTCTTTACTTTGTATGTCTAATAAGTTCTCTTATTGTTAG	2		>Scaffold_2:2105068	19
	Scaffold_4	23790159	23790378	219			>Scaffold_8:21582646	1		AACAGACCAAACAGGGTGCGTCTGCTTTGTCGCTTCTTGTCTCCGGTTGGGGTTTCCTGCCCCGAGGTGGGGGCCTCCTGATTAGTCAACTTTCTCCTCATCTGTTCGTCCAGCAGAGCCTGCATATCCATCTGGAAAATGAGACGGGGCCGAGATTAGGCTACTTTGTTGAACTAATTATCATATCCTAGCTTCGACAATATCTGAGGACATCGGAAGTATTGTGTTAGCTTATTTGTTTGTTTTTCTCCAATATAATTTTAAAAAATAATACTTAATACCCTGTTATAACAAAGAACAAACAAATATTGTAATCTGATGCTAACATGATAGCAACCTTCAGCAGTATCTTTTTCATAAGATTTAACCACCTTCTTTGCTGAATCCTTTGATCAGGCC…	32759
	Scaffold_7	7698272	7698491	219			CCTGTTTTTACAACGTTTAATTAAATATTAGGTACTTGGAAAAATATTATTTACAAAAATATTTTTAACACGTTCAAGTGAACAATACTTGGCATTTAGATGCTGGGTCAACACGAGCGCACTGGAAGGTATCTCTTACAAACAACTGTAACCAAATTTTGAACACAATTATTTATGTCGGCTCTGGGATTCGAACCCGGGACCTTCCAC	2		TAATGCCTCACCTCCTGTGGTTGGGCGCGGTCTCCTTGGTGTGGTCCGAATCACCAGACGGCCGGATGACCCTTGTGCCCTCGAAACCACTGACCGCTGGTTCAATGCGCGAACGCACAAGGCAACTTGTAGGAAGAATTTGATGCTTTGGTGTAAATTAATATACAAAACGCATATTAAATTATATATGAAAGACCAATTTCTGCTCAGTGGAGAGTAATTGAAGAGAAAAGCGCTTCTGTTTCTCTTTAACTGCTCTGGTAGCAAGTTCTATTACCACCAAGTTGGTGAGTTCTATTATTCCTACTAGGGTTCTAATGGTTATCACCGTTGTTGTTGTTGTAACCAGCTTGGCTACAGCTGGAGGGATGAGTGATGGTCTCCAGCCAACTTTATTTC…	1938
	Scaffold_2	41945131	41945350	219			>Scaffold_4:38641129	1		>Scaffold_2:19865035	20
	Scaffold_5	26759890	26760110	220			GTCGAATATACCAGTTTTCTTTCTGACACTAAATTTAAGGAACGCTTGTCGAAGGTAGGACTTGGATGGGTGACGCAAATTCAAACTCTTGTAATGCTGGTTATTCCGGTTCCACTCAGGCTGGGTGAAGTTAATCTGAGTAGCTGGTTTGTGAATGTAGTTGATAGCGACATTAAAAAACCAGCCATTGACGCTGGCTTTTCGATCCTCG	2		TTTAAAATAAAATGAAAATAATTTAAATTTGAAATATATTTTGAAATTTTGCATCTAATTCTATTCTACTATTGATTGTAAAAGACCAGTTATAATATCTACTATTTAAGCCAATGTCGATGGCGCGTTGAATGCACCGGGGACCGGGCACCGGATCACCGAAGTTAAGCAACGTCCAGCGAGGTGAAGACTTTTTAATGCTGGCATTCCGGCCCAACCCAGGCTGGGTGAGGTTAATGTGGGTAGCAGGTTTGTGAGTTTCCTGCGAATGGAAGGTAACATTCCCGTCTCGAGATGACCTAGCTGTTGAATGGAATGTAAAACTCCAGTAATAATCTACTATATTAAAATCATTGAAATTCAAGGCTTAGGTATTTTGAAAGGAAAGGACTTGAAATT…	32759
	Scaffold_3	35013074	35013294	220			>Scaffold_9:20479298	1		AGGCGCGGGGCCCCAAAATTGTACTGAGTTTATGATAGAATACTATTTTTAGAACCTTGAAATCGAAGCCAAGTGTCCTGAGCACCAATTCATAATAGTATCCGAAACGACGTTTATAACACCGAAGGCAACATTTTTTCCGAATAATAGTAGAAATATCTAAATATGTATAATGAAAAGAATATGTGTAGAAAGATGTCATTAGGTAAGATGTGTAGAAATTGAAAAACAATCCAAACCATCAAGATAAGTAAATTTGACGGCGCCGCAGGCGAAATTTTTGCAAAGTTATGGGGTAAAGTACTCGGAAAATATATACAAAAAGATATCTTAAAAAATTCATTAAAAGCGCCGCAGGCGACTATAATAAAGATCATTGGTTAAGATGTCGATAAAGGC…	2123
	Scaffold_2	22132514	22132734	220			CTGAACTATAATTCGTTACTGAACTGTAAGCTTTGCCTACTGGAACTTTTTTTACTTCCCGAATCCTCACTAATCATAGATTTACTGTCGCTTTTCAATTGCACTTTACGATCGTCGTTAACTAGATTTTTCATCGCTTCAACATGACCCAGTATTAGCTTTAGCGAACGCATCATTTCTGTTTGACTGGCGTCAATCCGATGAAACGCAC	2		>Scaffold_11:29073354	21
	Scaffold_5	14120596	14120817	221			>Scaffold_4:36045842	1		CTTAAACCTGGGCTTACCTACAAGCGTTCTGTGTTCTGAGTTTTCGCAATGTCGGCAATTGATTGATAGGTGATACTAACGAGGATTCTTCTGTCAGTTTTGAACTTCAAATGAATCTAAATTACATGAATAATCCGAGTATCGAATAGTGTAGACCGAAGAAACCGAAGAAAATTGCCTTCTTACTTTAAATACTTGCCACTGTGATACCAATTTATAAACATTTTGTCGTGATTCCTGGAACAGTACCGTTCATTGTAAGTAAGAAAAAAGAAATGCCTCTTCGACTTGTGACTTGTTATAGCTTCTAGTAAGATCACATATCTATTCATCATACCTATTTATCACCCTAGTTGGCCTAGTTGAATCTAATGCTGAAACTATAAATCATATTTTAAC…	32759
	Scaffold_9	2276967	2277188	221			CTGAAGTGGTACATAATGATACCTGTTACAGGCTACTTCTGAAAGACTGCTATAATTCAGGTACCTACGATAAATCTAAAACCGAAATTCTTCACAATAAAGGAATAGAGGGAGTCTGAATCTCTTCAGGTGAAGCTAACTGAGCCACAGTTGCGAGGTGCCAAAGTTCCAAAAGTTTCATGATAACAATAGGAATTATCACGAGTTGACA	2		TTAATAAAAAAAAATACCTGTAGCACCTAAATTATATACTGTAAGGTAGTTTTTCTTTTCCGTACCTATAATAAGGAAAGTATTGTATTAATCAAAAATTTGACCCAGTTTTCACATTTCTGGATAAATCATAGCCTCAGGATACCAAAAAAGGTGTTTTCAGCCATTGGTCCATCTGTCTGTGAACCATTATTCCATTTAAGATTTTAAAGTTGGTCCATGCCCAGCCTGACTGGGGCTGTGTGGGCATTTTTTCTCCTAAAATTTAATAAAAAAATTGAGGAATATGGGTTTTTTGATATTTTGAGTAGCTTCTGAGAAACCTAGGAGTATGAAGAGGAGAGCAAATATGTACAAATATACAGGGTCTATCAAATTTAAAACAATATGCCAAACAAC…	2133
	Scaffold_9	11503359	11503582	223			>Scaffold_7:4216798	1		>Scaffold_2:40640002	20
	Scaffold_3	51420231	51420454	223			AAAAATCTATCATTTTGAATTACGCCTTACCTGTTAGAGTTGTTGAAACGTGGAAAAAAATCGACTCCTAGTAGAAGATGACGCCGTTATTTTGATGTGGAAATTGAGGTCATTGCACTTTCAGTGGCGGCCATAGGGTATCATAAGGGCTCTCCCTTATGAAGCACTTTCGCCCTTTTTGTTATAGACTTGACCCCCCCTAAAATGGTCC	2		CTGTACACAAAACTTTCGACTGCGCCTATGTAAAAATAATACTAAGTACAATCTTTGTGGATATTTTAAAAATGGATATCAAAAATAAAGCCAAACATAGTATATTTAAAATACAAATGCTTGTATGGGACACGAAACTACCCATTTTAAGTCGGTAAGATATTTTTTTCTTAATACTTCTAAGGTATTTAATCATTACAGAAAAGGATTTTTATCTACAGAACTGCATAAAAAAATTCAAAGAGCTACAGCACTGCATAACAACAACCCATAGATCTTGTAATATGATCCCCAATTCTGCTGATCTCCCTTTAATATAAAATCCACTAATCTGTCAAGGAAAAAGATTCTCACTATGATAAAAAAAATATTTACAATATTATTCTAATTTAATTATTA…	32759
	Scaffold_1	61880888	61881111	223			>Scaffold_5:2091711	1		AGTGGGAGGGTTTCACCTATTTTCTCTTCTTTTTTTTGGTATTAGCGTCGTTTTTAACTTGAATGCTTCACTAATAAAATTTGAAAATTGTTTTCTAGGAACAGGTCTTTTTAAATTCGCAAACTTCAGAAACAGGTTAACTTGCACATTTCATTTGTTATCCACGCACAGGTATTATTGAATTCAAAAACAGGTTAACTTGCACGTTTTTCATCCAGAAACAGGTATCTTTTAATTCGCAGACTTCAGAAACATGTATACGAGTAATATTAACCGAAGAGTGGAAATGTGATCTACTGGACCCTGAGTTAAGTAGGTGACTCAACTTGGACGAAGGTGAGTGACTGGGACGATCTGATTCTTTTATCACAACTTCTCACTCTTCTGTTTTTACTCATA…	2356
	Scaffold_3	51810615	51810838	223			TCACAGCTTTTTTTCCGTAGCCATGAAACAGGAGCTACTGTAGACGCTTGTAGCCTGCCCATCCCGTAGTATGCCTCCGATGGGCGAGAAGTTACACAATACTTCCCATTTAGGTGCTGGGTCAACACAATTTTTTTTCAAACAACAAATGGATCTGTTTGCTAAGAAAATACTTTCGATACTATATCTGTAGAAATATATTTGGAAGTAAA	2		>Scaffold_3:17764188	20
	Scaffold_2	51250853	51251076	223			>Scaffold_2:28042178	1		TAAAAAAAACTGAAGTATGTACAGTTAAAGAAAAGTCGTGAAGAGAAAAACAAAAGTTTATGTAGGGCTCTACTCGAAGAAATTAGCACAAATGTGAATAAAATGGCACAAATTTTGCGAGGTCATTAAAGTATCCCTACTTCGAAAAAAAAACAGTGCTATTTGAACCTGGATTTATCATCCTCATGTGTGCACTAAATAAAGAAAAGAAATTAGTACAAAAAGAAGTAAACGGAATAAAAATGTAAATTAACTGAAACTCTGGTATATTAAAAAGAAAGTAGATAAAAATCACCCACTAGGTAAAACTTGTAAAAATATAAGGTACATAATGTTATGAACTTGCACCCTGCATGCGCAATGGGTGTAACTGTATTAGAGGATTAGATACCTAAGGGA…	32759
	Scaffold_6	27223023	27223247	224			CTAGATTTTCCGGATTGAAATATTTATATTTCAGTCCAAACTAGTTTGTCCTAGGACAAACTAGTTCATCCTAGGCACAACTGATTTTCAAATAATAAAAGAAAATGATAACAATAAAGATGCACAAGATAAGTAAGTGTTGTTTTATTTATCCTGGGCAAAACTGAATAAAAGAATGAATTAAAATACAGTTAAGTACACGTAGAAGTAGTC	2		TGTAAATTCATCTATTTTTAGATGGAAAAAATCTCAATTTGAATGTCCAGGCCAGACATTCAAAAGAGTTGTAGAATTATTAGTACTTATTAATAGATAGATCTTACCAATACTCTTCAATGTATTGTAGAACAGTTGCTGTTTGTTCATCTTGGCAAAATCTTGAACCCTATCCTGGGGCAGAAACTGACACAGGTTATCTATTTGAATGTTTAACTTTGACACTAGAGTTCTCACTTGCTGCTCAGTTACTTGTCTGCCATTTATGTTCCACTTGCTTTCATTTTTGGTATCAAATACCTGAAAGTAACCAATTTAATAGGTACCTATTATTACAAAGAAATATCAAAAGACGAACAATGTAAAACAACAAGAGATATTGAGGGATAAATAGAATGA…	2475
	Scaffold_8	25363912	25364136	224			>Scaffold_1:46914652	1		>Scaffold_2:17546949	20
	Scaffold_10	2695353	2695578	225			GATTGTAATGAGAGAAATCAGCTCAGACATTTTGAAACCAATAATTTGATGCTATCAGTAAATAGATTGGATCTATGACATATCAATTATTCTCAAGACCTCAAAACCGCAGTACTAATTTCAATCTGGCATCGCATCCAAACCGCAATCATTTTCACTGTCAAGTGGTAGATTTTATTTAGTGAAATCAAGCTCCAGGATCCAATTTCAAAT	2		CCCCTACCCTGGCTCAGTCAACAGTAGTACTTGCACTTTCCACCCCAACACAGCACACAGCACAGAAAGGTGGAAGTCCAATATGTACCTACCTAGAATTAGAAGTGAAACGTTTTAATGGAACGCTTAGGAAACAGATTTAGAAAAGGTTTCCAAATTAGAAAAAAAAACGAGAACTTTGAACAGAGACATTAAGCAAGAAACAGGGAAAAAAGAGGGTAAAAAGGACAGTTTTGAGGAAGAAATAGACAGTGCTTGCCTAAGTCACAAAATGTACCTAATTGAGCCTGCACCTATGGTTTTAAAAATCCTTTCTCACCAAATAATATTTCTTGAACCAGATAGAAGACTGCTTCCTGAGACTGTATGTTAACATTTTCATCTATGAGGAATTTTTAA…	32759
	Scaffold_2	48211895	48212120	225			>Scaffold_3:14631324	1		CTGTACTTTAATACCTCTCGTGTAGGTTGCGCTTCTAATATTTATATGTAGGTACGTCTGGTGATCAAGTAACAATAATTAATTTATGTATGAAGGTACCAGGAAAGCATAATACAAAACCCAACACGGAACCCACTAGCCCTTAGTTGAAGGTACCTATTAGTGATTCTTAGAAGCGTTAGCTTAGGAAAAATACCTTTATACTCATATATGTTATCTTGTTATTAAATAAATAAATAAATTTAAAAAAAAATATAGGTATACCTAGATAATGTTAATCCATCTCCTAGAGTGAGAGAAAGAAAGAAAGATCTCTAAGTATCTCACGTAATTTTAGACAGATTGAAATGCGCAGAAGACACACACAAATTATGATTGTTTTTATAATACGAGTGTACA…	2894
	Scaffold_5	44337805	44338031	226			CGGGCCGAGGTCCAAAGAGTTCAAGATATCAAAAAAATGATCAGAAGAGACCCCTATTATTTTTTTTAATCTAAGAAAATGTTGTTCTCTAACTTTTTTTGTATTTTTAACCAATTTAAAGAAGCGGCGCTTGCGGCCAGTATTTGCGGCCCTGCGGCCGCATTTTGCGGCCGATTTTAACCAAAAGTTTCGTGGTTTGTCTGGTGTATAAAAT	2		>Scaffold_12:9221091	20
	Scaffold_2	18923573	18923801	228			>Scaffold_13:19007228	1		TTTTTAAACACCAAAACTAAAAATGAAGCGCTGGTGCAATACTTATTTTATTGGTTTTTTTTTTCTCCAGTTTTTAAGAAATATAAACATTAAATTTAAATAGTAAAAAGATACATAACTAAGTTTAATTTATTTCTGCACAAGTAGTATTTTAATGTACAAAACTATATAAAGGTCCAGAAAATAATGGATATACAAAGATGTTTTGCTCATTGCTGAAATTAAATAATTTTTATTTTCTCACATTCATGTGATTTTATATACAGTGTGTATCAAAAGGTCATGCACAAAAAGAAACCATGTATAGTAGAGCTCAAATAAAGGCCACTTTTGCTTAATAGACCCCTATATGGAAATGGACCCTAAGGTCACTAGGGCCTCCACATGACCCCCCATAAC…	32759
	Scaffold_3	36562319	36562547	228			TATTATTCTTCTTAATAAAGAGTTTATATGTTCTTGTTCTGTCACTGAAGTTAAGAAACGTCGAGCAAAGTTAGGACTTGACTGGGTGCCAGTTCAAATTCTAACTATTGTGAGGTTGGCCCAACCCAGTCTGGGTGAGGTTAATGTGAGTAGCTGCATGGTAAGGCACAAGACGCGGGGACTTTTCAGTATTACCTTGTCAGTATAAACAAGGT	2		AACCATTGGGAATAAATTTACCATGCATGGGACTCAAACCAAAAACCTCCAGAATCAAAGTCAACTACTTTAGGAATGCATTATAAAACAGGACTAAATTTTACACGTTCAGTGCCATAAACCCATATGGGGGCTTCTTTAAAAATACAGCTGGTACCATAAACCCACCTGGAGGTTTCAAAGATGTGAAGAGTTTCTGTACACTAAACCCCCATAGGGATTTTATTTCAATGTATTTCTTATGTGATTTATTTGTCCTGGAACAGTGCTACAACTTGATTACTTGTCAATTTTGGCTGAACAAGGTTGGCACAGAACAAAATGTCATATAAAATATTGTGACGGTGAACGTGTTAAAATAAGCCAGACCCTCCTTCACATCTGAGTATGAACTAATCA…	3664
	Scaffold_11	23245610	23245838	228			>Scaffold_4:49004234	1		>Scaffold_3:34172303	20
	Scaffold_10	13605915	13606144	229			CTTACCAGTACGGAGAAACGGTAATACCTACATTAATGAGTGACATGAGCTCGCATTTATAAGAACAGATTATTTTGTTAGTACACCCCTACATCATAAAAATAATTTCGACGGACACATTTATGGGGAACCTCTGATGAAATCTAATTTTGACCATAAGTTGAGAAACCCTATTTTCTTTTAAAATTTGTTTCTTATTATTCCCCTACATCACA	2		ATTTTCTTTTTTCACTAAAGAAAACACAAAAAAAAAAATCGTGTGCGGAACTTGTTTTTTTTTTCTGTGCTAGAAAATCAATTGTTCACCCAAAACGGATAAACTTTTTTCACGGATTGGTAAGTCATTAATTTATTTTTATCAGATATTTTCTTTTTTTTAAAAAAAAAACTTTTTGATAACTGATTTCTAAATCTCTTTCGATTACTCAGTGGTCAAGGCGTCATGTCTGGTAATCCAGACTTCGCGGGTTCGAAACCCAGCCGGGATATGACAAGTTATTTTCCTATTTGGGATTTTGACCACATAATAATAACTACGGACAGGCCTACGTCTTGGGTTACTGGGACTTATTAGTCCTAGTTAGGCAGTGTAAATAAGGCGATATTATTACTATTA…	32759
	Scaffold_1	10788430	10788660	230			>Scaffold_2:35096306	1		CTAAACCACATACCTATAATGTATTATTCTTATTAACTAGGACCACCAAAACTTCTCAGAATCCTTTCTTATTTATTTTATAGTCAATGTGTACAGGTGTACAACTGTACACTGTACTTAATTTATAGCATATATATAAAACAGAAAAAAGGACTACCTACCTATGTTTGTTTGTTTGTCCGGAGTTGTTTAGCCAAAACGGTAAGAGATAGCGAAAAATGTCTCAGAATTGACCCCCCCAAAACCATTATCGCTTTTTCTAGAAAAATTATAAAAAGTTCAAAAAGGCATTGCTGTCCAGCAGTACGGCCATGTCTTAATAAATTTGAAATTTAGTCCCGTTGCAAAGCACGGGCAAACGGCTAGTTTGTAGCATAAATGATATTGTGAATAGTAAAC…	3683
	Scaffold_3	50123014	50123245	231			CCAAAAGTTTCATGGTTCGTCTGGTGTATAAAATTAATTACCATACCAAATTTCAAGTCTCTAGCTCTTACCGTTCTTGAGATATCCTGTTCACACACAGACACACAGACACACACACACACACACACACACACAGACAGACGCACGGACCAATGGCTGAAAACCACTTTTTTGGTATCCTGAGGCTATGATTCGTCCAGAAATGTGAAAAGCTG	2		>Scaffold_2:16886982	20
	Scaffold_9	12834995	12835226	231			>Scaffold_11:19614500	1		TGGATTATATCAAGCACACTACGAGTGTGATAGTGGTATTAGTCTCCAGCTGGTATTAACTGTGTTTCACATCGAGAGGTGGACTTCCTTAGTCTGGCTTAGGGAACGTTGATCAGAGCTTTGCTCGAAACGATTACCCCTGAGACGTGAGTGGCTTCACTTTCCCTTGTCTCATTCTCTTCCCTCCTCCCTTCTCTCACCTCTTTGGACCCAGTTTCTTCTTCCTCCTTCACTTTGCCCATTCCTAAACCTACTTGGGGTTGGCATTGTTCAAACTTGTTCTCATGGCTGACGTAACTTGGTTATCTCTATTTTAAGTTGGTTGGTGCCCACTCCATAATATAAGTAGGTTGAGTTTTTCGTTGTTTCTTACAGGTGCTTTTATATATATAAAAAAAA…	32759
	Scaffold_1	51009744	51009976	232			CATTATTCTAACAGCGGTCGGTATCTTCTGTCATGAAATCTACAAAGGGAATATGAGAAGGAAATCGGGAAAAGTTCATGTCCTTGTCGAGGTACTCCTGCCAGCTTCTAGGTTAAAGCGGGCAAGAACTTTCAACTAATCACAGCTCACTACGGGGCCCTGTGATTGGTGGAATTCTTGCGGCTTTCAACAGCTAGATGCCAGCAGAAATCACTC	2		TATCATAGACAAAGAACTAGTCGATGGGCAAACCCAATTCCTAGAAAACATTACAAAAACAAAAAGCGGCATACAGACAAGAGGAAGGGTGTATGTAATGTGTGGAGAAAGCATTGAAAATCAATATAAAGCATTAAAAGAACTCGAAAATGAGGCAAAGGAGAACAAACCCAAGAAAATATCTATTGTTGCAGCAGACGAGAAAATAAGAGCGAACCTAAGAAAACTGGTTGAGATTGTTTTCCTGCAAACAAGTTTGGAAATAGATTTTTATGTCCCAAAAAAGGAGAGCAGAAACATACCATCTGAGAACAAGTATGATACAATCATGATCAAATCTGCTGAAACTGGAAAATCATATTCAGATATGCTAAAGTCGATCAGGGACAATATAGATCC…	4025
	Scaffold_10	28302872	28303105	233			>Scaffold_7:36074858	1		>Scaffold_5:17515365	20
	Scaffold_9	17978942	17979177	235			GCGTTCTAGGTAGTCGGGAAGTGCCTCATAATTTTGATGATCTGTCAGTCAGTCAGTCAGTCAGTCAGTCAGTATCAAAATCGCAAATTTCAAAATTAAATTCCTCTGAAAGTTTTTTGCATAGAGTCTATAAATTTTCAATGTCTTTTTAATGATATTAGGACAATCTCTGTTCCAAATTTCATATCTCTATAATCAATTGAACCGAAGATATGAGT	2		CGAATCCTCAACTTTTGTTTGGTTTTTGAAATTTGACTTTTGATGTTATTTTCAAACTTGAGCCATTTTACGATTTTACTTTTATCTTTCTGATCTTTCATCTGTATTTTTTAGGTAAATAATTTTGCAATCTTGTTCAAGCTCAGGATTAAATAATTTTAATTCGAATCAGTTGAGAAGTTTTCATTGCCGGTACTTGGAACACTGAAGACTCCCGTTTTCATAGATACCTTTCTTTTGTCATTCCATTCCATCTTCAAGATACAAACGAATTTTACCAAGGTAAGTGTTCCTTTATTTTGATCTTGTTCTGCAGTTCTGAAGAATGCTGGCCTAGACTCAATCAGTAATAAATATTAATTTTCCATTTTTTAAATTGAAAATCCAAGTCTTTCAAGA…	32759
	Scaffold_9	10209482	10209718	236			>Scaffold_4:23790159	1		GCATTAACGTGGCATAGTGCCAAGGCAAATATGAGCTAATTGTTTATAATTATAAGAATATGTCCACGACCTCACCATTTGCTCCTCACCTACTTACTACAATCAGGAAATTTCAGAATTTGCGTTTAAGGGGGAGGGGGGTTTTAGATACTGTCTTGAACTTGATTCAACTAGGGGGTCCTTCTATGCTTTCCTTCCATCCAGTCTTCTTCGCCACCTCCACCAAGATAAATAGGATCAACATTTCTTGTCAACTATATCATGTCATTCATTGAAACTGGGTGGGGGACGTTAAACAGGGAGAAGACCAATGTCTCGCTAGATGACTATAAACTGAGAATGGACTAGCTAACCCTAACAAGTCAGACTAGCTTGCAGTTTCCCAAGGGTTAATGGCTT…	4835
	Scaffold_1	47014844	47015080	236			CTTTACTGCAAGGCGATCACATGAAAAATTTCCTATCATTCATAGAGGTGCATGATGTATTTATGTTATGTCAAGAATGATAGTTTCTTCATTTGTGGTTTTCATTTTATTAGAATTCTTTTAAAAACTATGGAATTTTTTAAGACAGTGAGATCGATTTTGAGAAAGGTACCTAAGCGTTATATCGGAGATCATCTAATTAAAGTATGCATCAAAAGC	2		>Scaffold_2:37467967	20
	Scaffold_8	17901069	17901306	237			>Scaffold_7:7698272	1		CTGAAGAGTGTTTCAAATTTCTTATCATTCTTATCAATTTTTAAAAAAATATCTTGATAATTTTTATTATTATTAGCTATCATTATAAATACATTTTATCAATTTAAACTTTTGTGACATTTGTTTTACACCATTTCCATAGATTCTTAAAAATGAATTCAATAAGCCATAGAGATCCCCTTTTTACTGTGATAAAATGGAATGCTACAAAACAATGCAATAGGTACATTTGCAATAGTGATTAATTTTGTCAATTTTATTAATTAAGTGGTTTATCTACTATCTCTATAATCTGTGTAAAGTGACCATCTTGCCCTAATCATATAGAAATCAACTTAAATTCTTGGGACAGAACCAACCAACCAACCATTATGGATCATCAAGTGGTTGGGCTATCTC…	32759
	Scaffold_1	1356702	1356939	237			TATCTGCTATCGTAGATGTTTTTAATGGCAACCTGGCTGTCAGAAGAGCAACGGCAGTGTTTTGAGATTCCGCAAACCAAAGTAGAATTTTCCAAACGTAAGGCTCAAAATCCTGAAATACTGGGAGGTTGTAAGAAGTACCAATATATTAGTACCCTAATGTATTGGACCCAATGAAGGTATTTGTGTACTTGAACATAGCAAAAGAAAGGAAGAAAA	2		ATTCCGGTTCCTGAGTTCTCTTATGTCTAGGTTCGCCTGTATTACGTTTCTCCTCAATATCAACCCTCGACAGTAAATTGTCAAGGGGTTGATATTGACAATAAATTTCCAAGCAAGGTGCTTCATTAATTTTATGATCAATGTGCTTCATTAATCGTTTGCCTGTTCTTCTTCTTGCAGTCCAATTCCCCAACAACTGGCAGTAGAACCCAGAGCAGTTCCGTCTCCAATAATAGAAAAGAATTGGCCAACACTGAAAATGATGAAACCGGGGTTCTAAGAGGTGAGATTTTAGACCTGAGCACTGTACTTATTGTGTAGTTATAGCCCTAAATTCGCCTCTGACAACACAAAGAGGCGTAAACCACATTTTCGAAATTTTACAGGAGAGCCAAAATG…	5232
	Scaffold_4	11518939	11519176	237			>Scaffold_2:41945131	1		>Scaffold_1:35321433	20
	Scaffold_11	23170871	23171108	237			TATTATTATTGCTAAAATAAATCATGATAAAATATGTATAAAAATATGACTACCAGCTTCTAGTGGGGACAGAAAACTTAAAAAGTTTTGTCGCCGAGAGATAGAGCTATAAGGCCGGCCATTTGCGGTTTACCACTTTACCCTTTTGATTAGTTGTTTAGGTAAATCATTGGTCAACTTATAGGACAGAGTTCAAATACAAAACCAACAATAAACGTG	2		GGGAGGGCCAGGCTGGGGGGGGAGGGAGGCCACCTCGGGGTGATGCGAGTGGGAGGCAGGCACCCAGTTGGGCTGCAAGATGTCTGCAGGCAACACACAAAACAGATCATGAGATGAGACACAGTGAGCGGGGGGGGATTTGTTCAAGAAGACAGGCAGAAACAAGGAGTCAGAGTGAAGGGATAGGAAACATGTGATGGGACATTTTGGAAGTTTCAACTGGAGTTACAAAAGAAAAGAGATAAGCCAGAAGAATCTGAGAGGATGCAAGACTAGACAAAGTTCAGACTGGAAGTAAAGGACAGCAAGGTACTGGAGTTGGTTTTGCAAAATATAGTACAATAAAGCCAAATATCATTGGTAGTCAAGTGCATCAGGCACTAGTCTGGCACGGAATGT…	32759
	Scaffold_7	14692596	14692834	238			>Scaffold_5:26759890	1		CTGCAAAACGGGATTTTCCCTTCAGATCTGAAAGTCTCAACTGTCACTCCTGTCCCTAAGAAATCTGGTGACCTTGATGTATCCAACCACAGACCTATATCTAACCTGAATATTATATCTAAGATCTTTGAAGGTGTTATTTATAATAAAATATCCCCATTTATATTCAATAAGATTTCTCCCCAACAACATGGCTTTGTCATAAAAAAATCTACCACTGAAAATCTTATTGAATTTAGCGATTTTGTAGCTAGATCCATGTCCGAAAAATCTGAAGTCCACGTGTGCTATACCGATATTGAAAAATGTTTTGACCGTTTGTCCCACCATGCCATTTTGACCTCTTTAATTAAATGTGGCTTCTCAAAACCAAATGTTGAATTTTTCTGCAACTACTTG…	5710
	Scaffold_9	19943740	19943978	238			CATTTATTGCACTGACTTTGCACAGATTCCCTGGTTCTGAAGCGGACATTAACCATTTTGACAAAGGTTTATTTGTGTAAAATACTAGACAAGCTCTAATTTTTGTTATCACAAAGAAATCTCTTTTTAAGACTTGGAATAGTTGAGATTCTAGGAACCAATTGAGAAGAAGAGGCCTCGTTTTGCAGACAAATGGCTAGTTCATAAATGGTTGTAGAAG	2		>Scaffold_5:13411335	20
	Scaffold_6	6496678	6496916	238			>Scaffold_3:35013074	1		AGTTTCTTTTGTCTCAGGTGAACTTCGAATCGGAGACCGTGCTGGAGTGCTCGACCACTCAGACGGATCTGGGGGGGTCCCCCGAGGGGGAGGGGGAGGGGGTAGAGGGGGGAGACGACGGGCATCTGTTCTACATTCCTCTGGGCAAGGCGGGCCAGAGCGACACTAGCGCTATCCAGGGCGTAGCGGTGAAGTTGGGAACTGAGGGGCCGGACCAGCGAGTCATCATGAGCGCGAAGCTAGTCACCAAACCTCCCGAGCCGAGTGACTTCGCCAAGCCATCCAGTGTCAGGTGAGCCTGGGTTTACTCTTTTTCAGGTTATCATGTCTGTCCCGGTAGCTCAGTGGTAAAGGCGGCACTCTGTGAATCCAGAGATTCCAGAAGTCGTGGGTTCGAAA…	32759
	Scaffold_11	1688279	1688518	239			AGATATAGAGTAAGTTGAAGGCGACAGAAAATCCCAGGATAAACTAGACGTGTCGAGATCTGCCTCTTCATTCAAATGAAAAGCCGTGTAGATTAGAATTATTTCCCAAACGTAAACACTCAGTCTGGGTTCCCTCCTTGATCGGGGAAATGTTTCAGGGATTTCTATTACTTTAAATCTGGAAAACAAAAGCAACTCGGAGCATACGCTTTTGTTGACG	2		TTCGGGTACATTGGCTTTTCTTGTTTTAATGCTTTCTGTTTATGTTCTTGAATTTTTAAATTTTGGCGCTTTTACTTTTTTGCTACCTTTGGCGTATATCACAAAAAATACGCCAACTCCGTTTCGCGAGAGCAAAACTCTACTGGCGCTGTCTTGACGAATCCTTTGGAACTAACATTTTTCGAAAAACACGGTGTTTTTTTGGAAGTGAAGAACTAGACCTTAGGTTATACTTTATACTGTATCTAGGTGTGACAGTCATTTAAACGCACCCTAAAGCCGTTTTCCTACTGAGATCTCAAGTAATAACTTAAGCATTTATTAGTTTCCCCATTTAAAACAATACACAAAATCTAGGGCAAAATTAATGGACAAAATCGATTACTTATGGCGAAATTA…	6396
	Scaffold_11	24467928	24468169	241			>Scaffold_2:22132514	1		>Scaffold_4:18324167	20
	Scaffold_11	9536047	9536289	242			TCTTCTTTTACTCTGTCTTATCCCGCTCAAGCAGGGTCGACGTTGTTCAACCTCATGGTTGAGGTTGATTGGTTTTGGCACATTTTTTACGGCTGGATGCCCTTCCTAACGCCAACGATTCTTTTTGATTTAACGTCCTGGTCCTGGATTAGGACGGGGGTTTTACCCTCCATTCGCTGGGAATCGTACCAGCTACCCACATTAACCTCACCCAGCCTGG	2		ATGGGGAATGCCTCCCCCCATGATGGGCGGCCCGCCTCTCATGACCCAAACGCCAGTGGCCGCCTCCCCTGCTGTGGTGCCACCCGCCAATGCCACTCTAGCCGCCACCCCCACAGCTGCTGCTGCCCCCTCCATATCCGCCCCAGCAGCGCTCACTAAGGATGACACCACACCTCAGGTATTTTATTTCATTTAAGTGCACAGTCCAGGTTGACCCAGCAAAGGTATCCTCCCTCTATAGAATGTGTGCTCCTTATTCAGATCGTCCCCGCAAATATATCTTCCCTCTATAAAGCGTGTGTTTGTTATTCAGATCGTCCCCGTAAAGCTATCTTCCCTCTATAAAATGTGTGTTTGTTATTCAGATCGTCCCCGTAAATGTATCCTCCCTCTATAAAA…	32759
	Scaffold_4	9239881	9240126	245			>Scaffold_5:14120596	1		ATTGAGGAGTTGACTAAGAAGAAGAGGGAGAAGTTCAGGTAAAGATGAGAAGGAGAAACTGTTTGTGGAGCATATTGAGGAGTTGACTAAGAAGAAGAGGGAGAAGTTCAGGTAAAGATGAGAAGGAGAAACTGTTTGTGGAGCATATTGAGGAGTTGACTAAGAAGAAGAGGGAGAAGTTCAGGTAAAGATGAGAAGGAGAAACTGTTTGTGGAGCATATTGAGGAGTTGACTAAGAAGAAGAGGAAGAAGTTCAGGTAAAGATGAGAAGGAGAAACTGTTTGTGGAGCATATTGAGGAGTTGACTAAGAAGAAGGGGGAGAAGTTCAGGTAAAGATGAGAAGGAGAAACTGTTTGTGGAGCATATTGAGGAGTTGACTAAGAAGAAGAGGGAGAAGT…	6538
	Scaffold_4	7129451	7129697	246			GTGAGCTTAAAGTACAACAGATTTTTAGAAGTAAAGTAATTCACAGGTTACAAACACTGCACTGTTAGTCAAGTGGTTAACGCGCTAGTCTGGTAATCCAGGTAGCGTAAGGATCCGTTGGCTCGAATCCCACCCAGTAAATGAATTTTTCCTCATTAGTTTGAGTTTGTAACCACATAATAATAAGACTCTCAGGGTTAGGTGGTAGAAAATGCTTTGAG	2		>Scaffold_10:14646535	21
	Scaffold_9	29943831	29944078	247			>Scaffold_9:2276967	1		CGACAGGCATGGACAATCCCGGCTTCAGTTCGCCCGATCTCCTCGAAGACAATCACAGCGGCTCCACCCAGCCTGAGGGCGGCAGCACCCCTCCCTCCTCCCCACACGTGAATGCCACGCCCATCCCCGCCCCTCGCCCCCCTCCCTCTTCTGACACCACAGACTTCTCCTTCGTGTCCATCAAGTTACCGAAAAATGGTGAGTTTCTTTTTACTTTCTAAACTATAATTATTATTTTTTTAACTACAAGTTTTTTAACTGTCGGCGTACAACTGATGGGTATTTTTTAGACAGAAGTTGATAAGTGTTATTTAATATAGGATTTTACAAAAAGAGGTTTAACTGTATTTCATTTATTTCTTTCCGACCTCAGTAGCTTGATCGATAAGGCGGCGGACT…	32759
	Scaffold_2	38676250	38676498	248			ATAACAATAAGTAATTGTGATTTGAGCATTTTGAGCTCGGTTTTATGATAAAAATCTTTTCTAAATTAGTTGTCAGTACCTTTTTAACTGTTTGATATTATTATGTAACTGTTAAGCTTAATCGCAAAAAGGATACCGAGGAAGAGATTTGCAAAGTGTTACGTGTGGTGCTGTATGGAGCAGAGACGTGGACGATGAGAAAGAAGGAGGAAAAATATCTG	2		CTGGATTCTAGAAACCAGTTTTACCTGATCTTTCAGAAAGCTTATGAGCTTGTTAACCTTAGGGTTATTTTCACCCTGAACTTTTAATTCAAATTGCTTTCTAAGGTCTATGTCAAGTTTAGAGGCACCGATATGACACAATATTACAGACCCAAGGGATTCAATATTCAATGCTGATAAACAATCTACAGCAGTTGAAAACTTGTCTACAAAATTACTAAATTGACCAAATGACTCGGATTTCACAGATTTCAGACTTAATATCTGATCGAGATAGGTACTGAATAGTACTCTCGTATCCAAATACTTATCAACCAAATTTTTCCATATCACTGGATAGTTTTGACCAATAGGGGGCACTCCACTAACCACAGACAACGCTTTATCAGAAAGCCTGGC…	7091
	Scaffold_6	30391612	30391860	248			>Scaffold_9:11503359	1		>Scaffold_1:36070950	20
	Scaffold_12	2483013	2483261	248			CAAAATGATTCTTGTACAAAATACAATAGGTACACTTGATTATCTCAAATAATAAATAATCTTAGAAGATATAAATAGATGTACCAACTCGGAAGTAAAAAGCTATAGTTAAAATATATTTCAAGGGTAAAACATTTCTTCAAACTCACTACCGAGAGGAAGCGTGCCTCTGATAATAAATAATAATAATTTAAGACCATTATGAAACTTGAGCCAAGATGGC	2		TACATAAAAAATAAAGATCCAGTCTTTTCATCGAAAGTTTTACAAACATAATTATTTTGTGACAAAAGAAAAATATACATATTAATTAAGTATTATAAGATAAAAGTGTAAAATTAAAATGGATATGATACACTGAATAAATATAGAACAATATAAATGGAGTAGGGGAATGTTGATCATATCTGTTAGGAGACGAGGGTGTTTCTCATGGGGTCCATGTACTCTTCGATTTCTTCCACTCTAAAAACAGAAATAGAAGTCAGTTTCAGTAGCTCAATGATCAAAGGGTCGGTCTATTAATTTAAATCCATAGGTTCTGCTTTTCATTTGTTTTTTCTACAATTCATTTGTTTTTTACATTCTTCGATTTTGTTCGAAATATGTTGAGGAGTTGTTCAA…	32759
	Scaffold_11	5664271	5664520	249			>Scaffold_3:51420231	1		AAGTTAATTTCATAGCTAAATTTCTACAAACTTCAAGAGCTATATTTTAAATTTAAAGAAATGCCTCAAATCATGTAAGACGTATTTATTTATTTTAAATACTACACCGCCTGAACAGAATTTTCTCTTGAGAATTTCATTTCAACACGTCTAATTTCATGATTTTTTTTAAAGTGGTTCCATAGCCAGGATCTTAAACAGGACCACCATTGTCCCTATTTAAAAACTTCTTGGAACAACTAGATACGAGATTATCTTATTAGGCTCAATTTCGGTAACTACATTAAATAATTATTTCCGAGATTTGACTTCAATCGAGATGTCCTTTTTAAGACTTTAGTTGACAAGATACATAAGTAGTTAAAATTTATTGGTATCGGCTATCGTTTAGTAACTATG…	7503
	Scaffold_2	33636434	33636684	250			GTCTGTCCGTCTGTCTGTCTGTCTGTCTGTCTGTGTGTGAACAGGATATCTCAAGAACGGTAAGAGCTAGAGACTTGAAATTTGGTATGCAAATTAATTTTATACACCAGACGAACCACGAAACTTTTGGTTGAAATCGGCCGCAAAATGCGGCCGCAAGGCCGCAAATATTGGCCGCAAGCGCCGCTTCTATGAATTGGTTAAAGATACAAAAAAAGTTAAG	2		>Scaffold_10:2844568	20
	Scaffold_4	35062717	35062967	250			>Scaffold_1:61880888	1		GCTGTACAGAAACATTGTATTTATTTTATTTTTTTTTTTTCAGTAAAAATAATTGTATAATGTTTTATCTCCAACCGATTTATCTCCAAAGTAGTTGTTGGTTAACTTATCATTTTTATGTTGATCACAATTGGGATATCACAACTGCTCAATCTCGCTTTGTCTTTGCTGAACTTGGGACTTGAACCATCAACCTCTAGGTTACAAGTCCGCCGCCTTATCGATCAAGCTACTGAGGTCGGTGGTTAATGAGCCTTATGGTCTTACTGTAAAGGAGTGAACTGCTCCAACCTCAGCCCGACACCCCCTGAAAGGCCCAGGACATTTCACCTCCTGTGAACGGGCCTGCTTTCAGCCGACTCTGCTTTCATTTAGCGATTCTATAATCATGAAAATAAA…	32759
	Scaffold_4	13683727	13683978	251			CGGATAAGGAAGATGATAGGGACATAACTACTTGAAATACTGCAAAAGTTGTTATAAAATAGATAGGCATCAGGCGCGACCGTTGCTAAGAAGCTGCGGAACTGCAGCACCCCCAGACGAAAAAGAGAGGATTTCCTCAAGTCCTAGCTCGTACACAATGAAAACTATCACACGTTTTTAAATTAATTAATACATAATTAGTATGATTGGCATGGTAAACAAT	2		AAAATAATACAGGAAAAACAAGCCAAATTTTTTTACATATCGATAACTGATGTATGTCTTATTAGAGTTTTTTTGACAGCTTTGTCCTAGCACTCCTGAAAAAGTCTCTGATCTGATGAGTCCCCTAAGTGAATTTGTCCCTATTTAGGGGGGGGGGGGGGGGGGGGGATACAGGTCCTTAATCTCAAGTTCCATTTCTTATATTTATGTTTCACACGATCACACGATCCAAAACAAAAATAAACTTTCAATATAAAATACTTGACCAAAATCTACAAACAGTTAACGAAAAAAAAGACTTGGGAAATTTTTTTCAACCAAACGGAAACTTTGAGTCCCACATACAAACACTAATAAATACCTGCTACAAAAGACTAGGATTAATCAAAAGAAACTGTT…	8106
	Scaffold_2	46773929	46774183	254			>Scaffold_3:51810615	1		>Scaffold_2:26436839	20
	Scaffold_3	44676038	44676293	255			GTCCCTGGCCTTGCTAAGAGACCCTCAAAATTGTAAAGAGAAATTACCTAGACCTGTATCATCTCGTTTATTCCTGGGAGCTGAAGACATTGAGACAACATTGTGCTGGCCAGCGTAGACATTGATGTGCTATGAATTGAAATAGCCTTCCATGGAATTTGGAAAATGTATTGCTCCTGTGTAAATCTGATAACTCTATGGAAGGTGAACTAAGTATGATGTG	2		AATCAAATCCACCATCACTTGCATCGACTGGCACCCAAACAATTACCTGTTAGCATGTGGTTCCACTGATTTCAAGATTCGCTTGTTTTCCGCCTATATTAAAGATATTGAGTCTGCACCACAGAGTACTAATTGGGGAAACAAGAGCACACTTGGCAATTGTCTTACAGAAATCAACAATTCAAGCAATGGAGGTAATTTTTAAAAATGTAAATTAAGCGCACTTGAACTCGGTGGTAAAAGACTCACTGGCTATGCGGAAGGTCCCTAGTTCGAACCACAGTGCAAAATAAAGTATATTCAAAATTTGGTGCCTGCTCGTGAGGGACACCTGTCGGTGCACATGCACATGAGAAGTCTTGTGCCACTTGTGCATTGGGTACCCGAATACCCGGTTAT…	32759
	Scaffold_11	5228393	5228648	255			>Scaffold_2:51250853	1		GCCATAATTTGGAAATAGTCAACAATGTAACCAACGCCCATTTTAAAAAAAATAGGAAAACTCTTTTTATACTCATGAAACAACCCTTATTAAACTCCGAATTCAACATTCGTTCGCATTGGATATGTATTTAGCATATGGAGCTGCCAACACGAACATTTGGGATCACGTGAAAAACATAGTTTACGAAATACCAGTTTACTCCACTCCACAGTTCTGAGGTAGAACTAAGGTACTAAAGTCACCATTGGTTTCAAAAATTTGTGTGAGGAGAATCCATAGTGGCTAAATAAAAAATGGCAACAGTCTTTTTTATTTTGGAGTCATGAATTTTTTGCTGTCTCTGGCGTTCAGACCTGTGTGGCATCTTCCGCATGGCAAGTGACTATAGCTTACCAC…	8416
	Scaffold_2	44189047	44189307	260			CTATGGTATACTCAAAGTCAGTAGGCTTGGTATTGTCATGAAAAATTCACTTTAAATTATAATGAATGCCTGGGAGAAATTGAACCAAATTAGTCGACGACGTATGCAATTATGTAAGTCACCAACATCGCTTGTATTGCACATTGCATAATTAAAAAACACGGCGCGCATACAAATTTATTGATGTCACCAATGACTTAGCTCGAGAAGACCCATCGCGTCA	2		>Scaffold_2:14747250	20
	Scaffold_3	13244011	13244275	264			>Scaffold_6:27223023	1		CTTACTGATTCTCTCCTCGTGGTTTATCCCAAAGCACTGAGCCATAACTTCGGGTGAGCCAGCTGCCGAGATAGGCAGACCCCTCCACCATGTTGCAATCTATCACTTGGCCCAGACCAGAGCGGCTCCTCTCAAACAGGGCCAAAACAATGCCCAACGCACACATGAGACCCCCACCGCCGAAATCTGCCGCTATGTTGGACGGAGGTGTGGGGTTCTTATTTCGCCAGCCCAGCAACGAAAGAATTCCTACCGAAAAGAGAACGCAGTGATGCTCTAGAAGTTATTGAGAAGAAAACAACGGAAAAATCCTGTGAAGTTTAAGGGAGAAACTATTTTTGTGGCAGAATTATCACTCATGCATGTTATCCCCTCCACCATTAAGCATTTAATCTAAAT…	32759
	Scaffold_2	49931413	49931678	265			TGGAACACCCTCTTTAATCACCCGACCTGGCCCCGTGCGACTTTTACTTATTCCCAAAAATCAAATCTACCCTGAAAGGTACCAGATTTGACAGCGTAAATGACGTTAAGAAAAAACCGGCAAAAGTCTTGAAAGGCCTCACACAAAATGATCTCCACCACTGTTTCGATCAATGGAAAATTCGCCTGGAACGTTGTAGGGATAGAGGAGGGGAGTACATTGAA	2		GTTTAGTTGATTGAAAATAACTTGATTTTTTTGAAACAGCTTGATTGACTTGAAAATTGTTCTTCAAAGATATTTCTCGTATTTTTTTGTTTATAGTCCGTGTACTAAAAGAAAATTATTTCGAATATTACACTCTTTTATAGAATTGAGTGGAGGGATACTTGTAGGTATTTTAAAATATGATTCAAATAGTCCCCTCACCTATAAAGATAAGATTTGTTTGTTTGCTATTTTCTCTTATTAATTCATCTGTCACCAGATAAAGAGCTCTTTGCTCCTATACAGGAGGTACAAAAAGGAGGATAAAAGTAATTTAGGAACTAAGATCAGATTTAAAAGACGAACAAAAATCGGTAGAATGTCCGCGTTATTAGATACTGCACAGGTATGTAGGTCGGG…	9633
	Scaffold_3	30631326	30631591	265			>Scaffold_8:25363912	1		>Scaffold_1:41857485	20
	Scaffold_1	22342968	22343235	267			CTTGGGTTTAGCGAGTGACGAAGCGCAATCACGGATTATTTTTGGAGGTATTCCATCTCTACCAGCTGGTTTACTTTTATCTAACTTTAAAGCCTCATCCAAAACCTGCTGTTCTGTGAATACGGGTATTTCTAAACTAGCAGAGTTGTCATTATCAAAGGTGTCTTGGATATTAAGAGAGCTGGGTTTAAATGAGCACAAGAAATGGTCAGCAAAAGCATCTG	2		TAAATTGAATGTCTATGCTTTAATATGCCATTTATATGGTTGAAACTATCCTAAAATGTCAAAGTCACGCTTAAATTTACATCAATAAATGCGATTGACATTTTGGTTCAATATTATTGGCTTCTAAAGTTATCAGCTTTTTAAAAATACATTGATAAACGCAACCTAAGAGTTGAATAAAAATAAGCAAAACTTATCAAATAAAGATGACGATTCTCCTTTAGTTAGAAGAAAAATGTCAGCTTTAGCCAATGGGAAATGGTAAAGTATGTAAAAATGCTTTCATAAATATGTCTGTCAGAATTTCAAGATACAGGTGATTTGTAATGAAAAATGTGGCTTCACCAAGTAATAATATAGTAATTAATTATTATAGATGCGTACTTAATACTTTTTTCT…	32759
	Scaffold_13	12027545	12027812	267			>Scaffold_10:2695353	1		GTATTCGTGGTATGTGTTTGTTTGTTCATCATAATATGCGTAATGTGTATCGAACTCATGTGTATGTTGTTCTGGAATCGAACCAGGCTCTGTGTTGTGTAGATTTTGTTGAATGGTTTGCACGCCACTCATTGGTGTAGGTCGGGGTAAGAATCTCTGCTGTGTGTTTTGAAAACCTGAAGTTGATGGTCTATTTTGATAATTCTGATTGTTGTTGTTAAAGGGGTTTCTTTGTTGGAATCTGTTCGGTGTAGAGTTAAATGATCTGTTTGGATTGAAATAGTTAGGACGGAAAGGTTGAGGATTTGGTCTGAAAGGTGCAAAGGGTCTGTGTGTTGGTGACGTAAATTTTGGTTTATGCGCTATGTGATTATCATTGTTTGGTGTTTTCTTGTTTAC…	9762
	Scaffold_8	3380845	3381112	267			CTACGCTGTGTTTATAATATTTCAAAAGTAAAAGAAAAAAGAGATATTATTTAAGTTGTCTTGCAATTTTTAATTTGAATAGGTATATTTTTTTAATTTGACTGATTTTAAAATTAAAAATTTAATGATTGTCAGAGAATACTCTGTGGGTTAATTAAAACTATGTAAATTCTTTTTCAGGGTTGGGTGTCAGAAAAAGTGCCAACTTTTAGCACACTCCTAAAC	2		>Scaffold_1:51745481	20
	Scaffold_9	27701348	27701616	268			>Scaffold_2:48211895	1		TGGCCGCCCCCCCCTCCATCCTCCGTCTTGATCTCCTGCGCCATCTGCACCTGCAGCGCTTTCGTGAACGCCGTGCCGTCCTTGAGCGAGATCACCTGGGATGAGAGAAACAATTTTATTTTTTTATTTAACAAACAAAATGAACAAACAAAAGGGTTGGGTGGAAGAGATTGCCACAGGCAATAACCCCGCCCTTTAGGTAGGACATAATTGTTATTTTCTTTTTTTTACTTATTTATATTGTCATTTGTTTGTTTTTTTTCTATTTTCTTAATTTTATACTGTTACCATTGTACTTTGTCCTCCTAATAAAGCTTAAAAAAAAAAAAAAAAAAAAAAAAAAAAAACTGCCAGCCTTTAACTGGTTGCTTGATACATAGCATACTCCTCAAAAGATCT…	32759
	Scaffold_2	25462544	25462813	269			TGGAAATATTGCCATTGCTGTTGCATCGTCCGGTATTGCCGCCACACTGATAGAAGGAGGCCGCACTGCTCATTCTGCTTATTGCCGCTCAATTTAAATTCAGTAGATACACCAAGCTGTACTATTGGAAAGCAAAGTGATATGGCCAAAGTCCTCAGGGATTGCAAGTTGATCGTATATGATGAATGTACAATGACTCATAAAACTGGCTTAGAGACACTGGAC	2		TTACATGGATTTTTCACACCAAGTTCCGACAGAATTATTTAAAATTTATTATTATAGTATGCTTTATTAGGTAAGACAAAAATATATACAGTAAAATACAATGAAATTATAAAGAAAAAATAAATAGATTGAACAAAAAAGAGAATGAAGTTAATGTCCTACCTAAATGTGGAGTTATTGCCTGTGGCAATCTCTTCCACCCAACCCTTTGAACTTTAAGTACCTATAATAAACATGAACGGTGATCGATACCTTTTTTACGCGTTATTTAAGTGTTGTAAAATTTCGTTTTTTTTTTTTGTTAATTTTCTGCCAAGACCACAAAAAGAAAACCTCTCCATAAACTTAATAATTAATCATGTGCCGTTCATAATAAACCTACTAATAGTTTATTTCCAC…	10132
	Scaffold_10	3123978	3124247	269			>Scaffold_5:44337805	1		>Scaffold_2:25601541	20
	Scaffold_6	873521	873790	269			GGCATGTCCATAATGATGTACGGGCGGAATTACCAGACGTTTCCAGTGAGGAGTCTTCTTGGATTCTCACGTTTTGAAAAGTTGTGACTCGTGTTGAACTTAAGTCTCGGAATTTTTGTCTGGTAATTTTGCCCTATTTTTTTGTTTCACGCACAACTACTTAGTATTAAGACTTGCATGACCGAGGGGCCATTTCTTTCACACAAATATGTACAGACCATTCTCA	2		TGAACACTGTATATTAGAGATTATTGAGAAATGAGAAGAGAACATCGAGGTTTGCAAGGGTAGTTCTATGCTCTGTGATTTTGTTCATAAGTTGTGAAGTTCTATTATAATCTTCTATTTTTTCTTATATTGGTTTGATCGAGTTTCTTGTTGTATTGTATATTTTTTAATGTGAATTACTCAAATCAGAACAATGGTTTACTATTTTACAAGCAATGGTAAGTAATGCAAAGTTGCGTCAGTTCAATATTTCCCTCAATCTTAGGTACCTGTTTGCAATTGCGAAGTTTTGTCCTTCTATCCTGTCAATTATTTTTCATGGCTTATGTTGATTATTTTTCCTTGGATCTTACATCTACTTCTTAAAAAATAAATCAAACCACCTAACTTCGACTAGTT…	32759
	Scaffold_6	14213624	14213894	270			>Scaffold_2:18923573	1		ATGTCTCTTGCTTGACAGAACATTATTCACCATCCATTCTTTCAACCAGCCCTGACCTTTTGTATATGTATTCCACAATATCCCTATATCTTCTATTCACTCCTGCTTCTTTAAAAGCTGTTAATATGGCACTAGTTTGCACCGAATCATACGCCTTTTCAAAATCGAGAAAAATAAGGAAAACTCTAAAATTGTATGGTTCGCATTGGTGGTTTAGTTGTTTTAATGTGAAAATGTTGTCATTGGTTGAAAAATTCCTTTTAAATCCTGTTTGTTCTACCTCTTGCTCTAATTCCAGCGGTGCGTGCGTGGGCCTGTGTGTGGTTGCGTGGGTGTGTATGTGTTTGAGTGTGTGTGTGTGTGATGTGTATGGTGTGGCGAAGCGGGTACAGCCTGTCT…	10155
	Scaffold_4	30887381	30887652	271			CAAAAAAGTAAAAAAATAAGGACCACGACTTGCCGATACAGAATTTTTTGTGGAATTTAGAATGTAGAAAAAACAATATTCTACCATATAAAACAAATTTGAAGAAAATCGGTTGAGCCGTTTTGGAGATACAAGTAATTTTCTATAAAATCTCAAAATTGGCACGTGTTTACAATGTGAAGCGATCACGAGGAAGTTTTATGTCCATAATTGGCAGTGTTTTTTTTT	2		>Scaffold_12:4854721	20
	Scaffold_13	21824389	21824660	271			>Scaffold_3:36562319	1		TTTAGAGGTGGAAGAGATCACTTCACGCCTTGTCAAAGTTTCCCTAACTCGATCTTTTCGTTTCTTTTTCCAATAATCCAGAGTTAGTACATCTCAAAATGGCCTTACTGTCGGCGAGATTAGCTGCCGCCCTTGCGAAAAACATTCCAAGCTCTGTGAACCAAGTAAGTTAGCTTTCCAAATCTGTCGTGTCCTCTGACGAACACCGTGCCTTGCTACTTTCCACACAACCGGCTAAAATGTCCGTTTCTTATCAAGTCTGATAAGAGAGGTCTTATCTTTTGCGATCAGTAATTCAGGAAATGTTACTCGTTAATTATTAAAGTAAAGACAATGAGCTGGAATTAGGAATTGATCGCTAAAAACATTGTTTTCTGGGGCTTGCAATGTGCCTTGATA…	32759
	Scaffold_12	22993982	22994257	275			CAGTGCACCATGGACTATCATATAAGCTGAAGTTGCAGTGGGGCATTTTGCTTCGGTAAAGAGTTATGGCCAAATCCCTGTTTTTCCCACTGATCAAGAAGTCGTTTTTGGATCGATGCATGTTTTAAAGAAATCATGCTTATTAGGTAAGTTGTGACTTGATGAACGGTAAGTCAAAAATATTCCCTTCAAATACCGTTGGATGCATCAAAAAATGTTAAAAAATCA	2		TGATATGACCATGCATTTGAAAGCGACGTTAAACCCAAATTAAAAAAAAAAAAAATACTTGACTTTCTATGAAAACTTCTCTAGCGCTTGTTTTTCGCACTAAAAACTACTCAATTATAATACAACATATTTTTTTTAAATTAAGGATAGTCCAAAAGTAAAGTTATCATATTTGTGTTAATCATATTCGTGATATCACAACTACTCAAACTCGCTTAACTAAATATACGCTGAAACCCGGACTCGAACCACCGACCTCCGGGTTAAAAGTCCGCTGCCTTATCCATCAAAATTTTCACAAATAGAACCTGAGAGCTGACAAAAGTTGTACCTAAAGGGTTGGGTGGAAGAGATTGTCACAGACAATAACCACGCCCTTTAGCTAGGACATATGTGTGA…	10197
	Scaffold_1	56013227	56013503	276			>Scaffold_11:23245610	1		>Scaffold_8:30589774	20
	Scaffold_2	25234530	25234807	277			GCGGAAGGTCCCGGGTTCGATCCCCCGTGCCGACAAAAATTTGTATTCTTAGTTAGGTTACAATTGTTTGTAAGGGATACCTTCCGGTGCGCTCGTGTTGACCCAGCACCTAATTGGGAAGTATTGTGTCACTTCTCGCCCATCAGAGGGGAGGCATACTACGGGATGGGCAGGCTACAACACAGACCACAAGCGTCTACAGTAGCTCCTGTTTCATGGCTACGAAAT	2		CGGAGAAGGACGAGGATGAGAAGAGGGAGAAGAAGAAGGAGAGGAAGGAGAAGGACATCCGGAAGAAGGCGAAGAAGGAGGAGGATGAGGACGGGGGGGAGTGGGAGACGGTGCGGGGAGGCGTGGCCATTCCTTCGGTGAGTTGTTAGTATATCTTCCTGTAGTCTGACCCGGTAGCTCAGTGGTAAAGGCGGCACTCTGTGAATCCAGAGACTCCAGTGGTCGCGGGTTCGAAACCAAACGGACATGACATGTTATCCTTCCCTTAGGGATTTTTACCACATAATAATACGTCTTGAGAGTAGTCATAGTGGCAGAGCGAGTTAGCGCGCTAGGCATTGCACGCACGGTGACCTGGGTTCGATCCCCAGCGGGGCAGGAATTTTTCTGCTTTGTACT…	32759
	Scaffold_3	8180444	8180722	278			>Scaffold_10:13605915	1		GTCTAGGAGACCAAGAGCATGTGTTTTAATATATTAGTAAACACTGTGTAAGACTGAGAGTACTCCAAGTCAGGACAATACTAATAATAATAATAATATCGCCTTATTATACTGCCCAATTAGGACTATTAAAGTCCCATTATTCCAGCAGTAAGCCCAAGACATATTATTATGTGGTAAAAAACCCAAATGGGAGGATAACTTGTCATGTCTCGGCTGGGTTTCGAACCCACGACCTCTGGAATCTCTGGATTCGCAGAGTGCCGCCTTTACCACTGAGCTACCGGGACAGACATAATAATGATTTCCAAGACCTTCTACCAGCAGGTGAGACGCTCACACTACTAATTATAATAATAATATCGCCTTAATTATGTATAAATACTTTTATACAACACA…	10283
	Scaffold_11	12560063	12560343	280			TTTTGAAGGAAATAAAAAAAATTGGCTAAAAATTAGATCAGTGGATGGATCAGCATTACTTGTGAACCAATCGAATTAATGGTTGTTAAAAATCATCCAATGAAAATATAGCTCCAAAACTTACATGAGTAAATTCTATTGTTGAATTCCCGAAACCTTGTGATTGGCTGTTGCCATGGTAATAACATCAGTATAGTAACAGTATCCGCTTTAGCATCGTTCATTAATT	2		>Scaffold_13:16591669	21
	Scaffold_6	13271374	13271655	281			>Scaffold_1:10788430	1		CGAGCTGGAGGGGCCCGGGCCAGCGTCGGATGACGCTCTTCACCTCGAGAGACGGGTGGGACTCCTCAGTGGGGTGGCTTTGATTGTCGGGACCATGATTGGTGAGTACATGACATATAAAAAAGAATGGTAAAAAAGATAAAGAGACATTGTCTCTTTATCTTTTTTACCTTCCTTAACCTATAATAAGTGGTGGCTCAATTAGGAGAGCAGTGAATGGGAATTGCTTTATTAGTGGACTGTATTTTTTAAATGGATGTTCAAAGATGGGCCTTTAGGCTGGTCTTAATTTTATTTCGAAAAAGGGTAGTTTCCAACAAAAAGACACATAGAGAAAGGCTTACCTTGACGGGATCTAAAATGCTACTGAAAGTTTTCGTGATTCGAGAAAGTTCGGAA…	32759
	Scaffold_1	22619959	22620240	281			GTTTTATATTTTTCTTTCGTATAATATATTTTTTGATGATTGCAATAGGTTTGGTTTAATGACAAGGATTGTCCAGTCAGAGCTGTTGGAACTCAAGTCCATAACGCATTCTCTGCTATTTATTTGATATAAGCTAATTCAGAACATACTTGAAGTTGGGAGCTTTGCCTTTTATTGTTTTCGTATATGCACAGTGAGAGAAAGCCATGTTTCCAATTTCAAGTAATACG	2		TGATAGTCTCGCTAGAGGACTTTAAACAGAGAACAGATACTATCCAACCCTTACAAGCCAGGCTAGCTTGTAGCTTCCGAAGGGTTCAATGGCTTCTAAAGAAAAGCCCAAGTCCTCATGATGGTTGATCGCACATAGAAATATTTGGTTCAGGACGAGCCAACTTTGAAATAAAGTTGGCTGGAGACCATTACTCACCTCTCCAGTAACAACAACAATAACAACGACATAGGCCATTAATAAAAGCATATAAAAAAATTGAATAGGCTCCTCTCGCCAGAACAAATCCTATAAATTATATAAGAATACAACAGGTTCATAAAACGCCTTCAAAAAATATCACGAAAAAGAATGCGTCTCGGTGACATAAAACCCCTTCAAAAAATTAACTTATGCTAA…	10370
	Scaffold_1	17780436	17780717	281			>Scaffold_3:50123014	1		>Scaffold_2:26854743	20
	Scaffold_11	6216756	6217037	281			ATTACACGAGATAGATATTACACAAGAGAGAGATAAGGGGATCACTTACACGATGACGAATTATGACAGACTGATCGCCTCCTTGCGTTAGGTACCTCATGCAGTAGGTACCACAAACTTGCTAACGAACTCCGAGTGCAAGTTGCACTTTGGTAGAAGGCGAAGGTCGACGACACACGGGGTGATTAATAAGTTAAGTCGCCGACACACGGTGTTGAACGCGATAGGATA	2		CTCTCTTTACATAATTTAAAGATTTCAAAGTACATGGACAACACTGACTGCAGTTCTAGGCAGAGTTCCACTGGTCCGGCGTGGATTTCTTCTTTCTCTTGTCTCTTTTGATGTGCGAGTACGCGTGGCAGGAGGGAGGGGGGTTGTGGGCGTGGGAGGGGGGATTGCTGACGCACTCCTCGGGGGAATGCCTAGAGCTTCGGGCAATGTCTGCGTCACTTTCCCCTGGAAGAAAAACCTGGAAAATGTGTAATATGAATATCATTTTATTTTATTTATTTATTCACGAATGGTTTTGACAGAGTGATAGGAATGACCTGTAAGAAAAAAGAAACGGTTATAAATTAAAGGGAATATAATAAAAATTATATTCAGGTTATGTTTATACAAATATTATCT…	32759
	Scaffold_12	597648	597929	281			>Scaffold_9:12834995	1		AATGATGCCTGCGGTGCTACAAAAGTGGTTTTGGATATACTATTATGGATTGGTGTTTAGGACACTAGGCTTCGATTTCAAGGTTCTAAATATTTTTGCTAGTTATTTGCGTTATTATGTCACAATTTTTTAGTGGGTATCATTGACATTATGTGAATTAATGCATCATATCTCCAACCAAACGTCATATTCCAATATATATCTCGTAATGCCGCCAATGGTCGTTGCCACTCTACAACTACCCCAATTGTCCTCACGAGGCTAGGGTAGGCCCCGACATCCAAAGTACAGAGCTGAAAAAATTCCGACCCCGCCGGGATTTGAACCCGGGTCTACTGGAGTGCAAGCCGAGCATACTATCGCTAGGCCAAGTGACTACTAAGGTTCTAAATTTAGTAT…	10915
	Scaffold_1	4318599	4318881	282			CGGTCACCAATTCATGTCCTCACCACGTTGGACGTTTCCTAATGAGTGATCGGATGAGAACTGGTGTACTCAACATGCCATTTCCGCTGTAGATTGCGAGTTAGTTTCTTATCCATGTCAAATATTTCTGACAAAATATTTGTTACCATATTCTAAAAGAACTTGTATCCTCAAGCGAATCTCTAATTTTAAGAAAGAAATAATTTGCTACTAGCATGACTATAATATTTT	2		>Scaffold_11:16771954	21
	Scaffold_7	18610096	18610379	283			>Scaffold_1:51009744	1		GTTCCAACTTGCACGTGCACGGGTCCTCCGGGTGACGCATTTCTTCCAACGGCTTTTCAACGGATTTTTCTCGTAATTTTGAATTTCGAAATTCGCCAGATATTTGGTCACGAATATTTTTAGCCTGCAGATTTATTTTTGGCGGATTGACTAGCGTAAGTCAGCATGAATTCTGTTCTGGTGGCGTGCACTAGGGTGACGGTTGTGTTGCTGATCTCCTGTCCTGGCAACGTGTGCTGCAGGTGAGTCAGCATGCATGCGAGCTCTGAATAATCCTTAGTAGGCGGCCACAACGAGGACCCTTGATCCTAGACCCTAGACCTTACACATAGATATAGACGTCTACATATCGACGATTTTCGGAACTCCGTTCAGGTCGCTTACATTTAATAACATGGT…	32759
	Scaffold_11	3911788	3912071	283			TCCGTGCCGAGATCTCGTCATGTCTCGTCTACTCTCGTGCGCTCTCGTGCTGGTGTGTGTGGGCCTCGCGGCCGGCCAGAAGGCCGCCAAGGAGACGGCCGCCAGCGAGTCTGGCATCCTGGACAACTTCGATGTGGACGCGGTGCTGAACAACGGCCGCGTTCTGAAGAATTACGTCAAGTGCGTGCTGGGCAAGGGGCCTTGCACGGCCGAGGGCCGGGAGATGAAACGT	2		TTCCTTTCTCTTCCTAAGTTTTCACACCTCTTGTATTTATTTCTCCTTTTCTTATAATTTTTTTTCGTATAGATTGTTAACTTTTTCTTGTTGACTGAACGGGGGCGTCATTTTTAGGGGCGAGAGGGATAGAAGATGTTTTTTTTCTACTTTTTTTGATGGTAAATTTTTAGAGTAAGAGTAATTTTTCCTATTCACTTTAACCTGGTCGAAGTTTGAATCTAGAAAATTGCACTGCGACCGCAAAAGAGGTGATCCTATCATAAGAGGAATCAATGCAGATGTAAGTCGCTAAGTGCAGAGAACTTAGAAGAGGGGTAAAAAAGGTGTTCTCAATTTGATATCGATATGATACCGGAAGAGCATGCCAAAGGCATTATCACCACCCTTGATCAGGCT…	10979
	Scaffold_2	26247076	26247359	283			>Scaffold_10:28302872	1		>Scaffold_13:21229771	21
	Scaffold_4	34686566	34686849	283			TGTCAGTGGTAGCATCTCTTGAATAAAAATTTACAACTAGCTGAGATCTAAACAACTCTATGTCATGTCAATGAAATCTACTATGGGTTATTGTTCTTAAATAAAATACATTGAAAACACCAATAGGATCGTAATTCTACGTGAAAAATCTCAGCAATAAGAAATGAACGTCTTCAAAACATTCAAAAGTAAACAAATTCTCAGATTATGCAATTTAAAATCAAGGCCGTTTT	2		ACATGTAATTAATTTAGGCCCATAATGGTGATGGATTTGACTCAGATTTCATTATATGATAATAAATAATTTAAAGTCACATAGCCTCAAAACCGTTATCTTCCATAAGACCATCAGAACAATTTGGCTTATCTCACGTCGCTACAACCATAATCTACAGCATTCAATTATTTGTTTATTTAATGAAAGGGTGAAGAATTTCACAATAGTTGTGAAGGATGTTCAATTATGAATAATAATAAAATTATTATTTGAAAGAGAAAAAAAAAATACTTATTTCTTCAGTATGGTCTCATTAGTTTAATGTATCATTCTTCGGACTAAGTTGTGATTTTTATAAAACTTTGTTAAATATTGATGAGTTAGAAATTCTAAACACATAACTAGGTGCTTGAATTA…	32759
	Scaffold_1	26511801	26512085	284			>Scaffold_9:17978942	1		TTAGCAGATTCCAGCGCGGCACTTAAAATTTGTCGCGAGGACCTATATTTTTTATTATTTAATAACATATGAGACAAAACTAGCTTTCATTTAATTCATATTAGGCCACATTCTGACGTACTGTTCTCGATATAGAAGCCAGAATGTTCGAAATTTCGACCATTTTTTCAGACTTTTCACGTTTTTTTACAGATTCCAGCACGGAACTTAAAAGTTATCGCGAGGACCTATATTTTTATTGTAAAAACTGTCTGAGAACATCACATGATTTTATTTGAGCCCTTTGTTGCCATATTCTGACAAACCGTTCTCGAAATATGGGCCAGTTTGCTACATTATCCGCTATGATAGATTTGGCTCGGGATTTTGAAATTTAGAGCGATGATGGTTGTGTGTGTG…	11717
	Scaffold_8	7985550	7985835	285			TAACCCAGATAGACCGGAGTTTTTTTTCGACTACTTTTTATTTAAAAACTAGCTAAAAGTGTTGTATATCATGTTTGTTGAAGGGCATTTCAAGTTTAATGAATAAAAAAGTTTTTGGTTTTCGAGATATGGCCATTTCCCTGAAATCCTTCTAGAAGGATTGCAGGTGAAATTCATAGACCTCCTAAAGGCCTGTTTTCAAATCCTTCCAGAAGGATTGTAGGCTCATCTGGGC	2		>Scaffold_5:33848720	20
	Scaffold_1	4209784	4210070	286			>Scaffold_9:10209482	1		ATGGAGAATAATTTTATAAAAATTCAATAAAATAATGGTAAATTGAAGAAAAGGAAATTTGAAAGACTGTAAATAAATATTATTTATAGGATACACATAAATATATTAATATGATAATTGAATATTGGATTCGAATAATTTGGTAGATAAATAAACAAAACGATAATAATAAAGAAAAAGTGACTATTTATAGAAGAAGAAAAAATAAATCAAGCAAGGACTGATTTTTTCTAACTTTGAGAGTATTTCCCCAAAAACCTATCAAACTGGAGGTATTTTTAACTTATTACTGAGAATAAATTTATCTGATATGGATTTACTTCACTATACACAATAGATTATTTTTTCTCGGGTTGATTTTAACACGTCTTCCTGGTAAAAAGGAGAACACGCGTGCCT…	32759
	Scaffold_3	5527823	5528109	286			TTCTGTTCAGGTGTAAAAAAATATGACAAACCAAACCGTAAAAAACAAAGTAGTGTAGCTAAAAACATCGAAATTTTGTTGGCTTTCTGTAGAATTGTTCAGAATCAATTCATTTTAAACAGGAACAAAGCACTGACCCGAAGAATAAGCCAAAGTCGGACTATTTCGGAAAGTTGCAAAAAATCACTTTGTGCAGTTACGAAGGCGAATCCGAAAAAACGGATTGCAGATCCGGG	2		TGTTGAGGTCTTTTACAAATCAGCAATCAGCATTCTTCTACATGTATTACTTCCGAGAAATTTCTAATATTAGAAATCGGAAGTATTGTGTTCGTTTTTGTAAAAATAAATATTTTTTTGCTCCGATTTCAATTTTTTTCAGATTTCTGGACGTTTCATAACCTCCTGAGCAAATTTGGTTTTGTGTCTGTCTGTCGGTCGGTCGGTCTGTCGGTCTGTTAAAACGATTCCTTGTAACGCGCAAATCTCGGAAACTACTCGACCGATTTTGATGAAATTTTGCACACATCTAGGAGACATTCTGTAGATGGTCCCATTTTAAATTCATCGAATTCGTACTAGCGGTTCTTGGTGAAAGAGCCCATGCACCTGACCACTAACTTTTTACTTAAACGCTTA…	11746
	Scaffold_2	9493086	9493373	287			>Scaffold_1:47014844	1		>Scaffold_5:22748728	20
	Scaffold_4	5919138	5919425	287			ACCTTTTTTGAAGAGATTCCTTTTATCCTGTGAGCCGAAAATTTGGTTCCCGATTTGACTTTTGCAGGTCTTCCAGTTGCTTGCCGTTTAAGTTAGGAAAGTTGAAACTCGACTACGTTGCAAAGATAAAAAAAGGGGCAATGTAAGTAATGAGACAAGCTCGACAGAGAGATTGTTCCGTGTGGATTAATGAGTGAAGAAACTTGACTTTGGAGAAATAGAAGAAAAGAAATTTT	2		CTTGTTATCAGTTATGTTATTTAATTTTTTAAATAAATAAATAAAATATTTTTTTCTGACAATCTCTAGACATTTTCTTAAATCAAGCAATCTTATTTTTCATCATTTAACATTGATCCGGGTGATTTTATGAAAACTACTAACTCGCGATTTTTCTCGCGCAATTTTTTGGCCAGTTGGATCATGCATTAATCGTTACGTTTCACTCTGTTTCAAATCAACAACCTATTTTTGATTTTTCAATTGATTTTTTTCACAACTTGAAAGTTTTTTTTACAATCCCATTCGCCGAAAGCTGCGAAAGGAACGTTAAAATTGTACCAAGTGTAGATAAACTACTGCTACTTACACTTAACAATAAAATTTGTCACTTCGCATACCTACTTTTTAACATTTCAA…	32759
	Scaffold_4	33303177	33303464	287			>Scaffold_8:17901069	1		TAAATCTGATCACTCGGGCTACTGGTCTTTCTGGGACCCTTGAAGAGCGAAGAGGTGCCCAAAGTGGGGCAACTGTGGCAGGGGTTAAACTGGGAATATCAGGGGATTTGAAAATTACTTCAAAATGTCGAAGAATTTCGTAAATTTTTTGTAAGTTTGAGTAATTGTAACATCACGATTGTGATTAACACGAATATCATTGTAAGGAATGTAAGATCTTTGTAAGATACTACGAGGTACACCCGAAGGAAAAGACAGTAACCACCTCAGAATATTGTTCCACATAATTGCAAATGAGTACGTTCTTATAATGACAGAAATTTCGAGGTTTAATGACCTCGTAAATAAGTTATGGCTTTCCAGTGGGTACGATAAGATACTTTGGGATGTTCAGATAAC…	11971
	Scaffold_9	27642073	27642361	288			ATTTTTTGGATGCGTTTGATCACTCAGCGGTTCTCAATTTACAATCAGGAGCCTAGCTCACATCAAAAACAATATTAAGGGTAAACATGATGAACTAATTCAGGGTTACAATCATTACACGTCAAATAGAATAGTTGACTCACGCAAAAATTGTAATGTTTTAGGAAGTGTCCGCGCCCGGAAATAAATTTGAAACATGTTTAATTGTTTAACGCCTCATTGTGGTCTTTGGTAGTG	2		>Scaffold_1:17611421	20
	Scaffold_13	20685381	20685670	289			>Scaffold_1:1356702	1		CTTCTCAATGCGGAATTTCGAGTTTCCAGTGCAGTGCATGTGTTCACACGGGCAGGAGACCTCTCTTCTTTCGCTCTTATGGCTTTCTATTGATTCCATACAGAAAAGTGCGCGTTTTTAGTTACCTACTGAGTTGTTCGTGGAAATTTTCTCTTCAAAGGTAAGTTCTAATGATTTATTGAATATAATCTGTATCATAAGTTGACCAAGACCAGCTAAATACTTCCAAAATATAATTAAAAGATCTTTTTTGTATAAATTTGATGTTTACCTTCTTTTAGATATAATATGTTGAACAAGTAGGTATATTATAATATACATGCAGGTATTGTGTTTTAAACCATGTATGTAGAAGTAAACTTAATTTATAATAAAATCATGCCCTTAAATAGATACCTA…	32759
	Scaffold_2	49524266	49524555	289			ATTCTACTGAGGCTATTCTGATGGTTCATCAGCAGGTTTCTCTGATTTGAGAATTTCTCGATGCCCTCGGAGCATTCTAGGCATATTGTTTCCATTAGGGCTTTCTATGTGTCATTTATAAATGGTGGGACAACAGGAGAATTTTTCTATGCCCTGAGAGCATTCCAAGCAGATTTTACCCATTAGGATTTCACTCTCCGCTGGCTAAAACAAGACAAAAGTTAATTGGACGTTGCG	2		AAACTTGCTTTACTAAATCTATGCTGAAACCAGGACTTGAACCACCAACTTCCACGGTTAGAAGTCCACCACCTTATCAATCAAGGTACTGAGGTTGGTTAACAGTTCTAAATCTATTCTAGTTAATAAGAGATGTTTCTAGATAAAGGTATTTAAAGGAACATAAATATTATTTAATAAGCACAGTGCCTTGTTCCCCAGACTTGGAAAGCATTTTTTATACTTTATAAATACACTTGAGATGTAAATAATATGTTGGTATTTAATCAGGTTGGTCAGTGATTATCAAGATCTTGAAGAATTGTTGAGAGGTTTGGGTTGATTTGGGAAGATAGTGGTTACAGCTGCTGGTTTTCACAGCTAAATCAGAAGGTTCACAGAGGTACATCTTCACCATTG…	11996
	Scaffold_13	19675273	19675569	296			>Scaffold_4:11518939	1		>Scaffold_10:10889993	21
	Scaffold_8	200404	200703	299			TGAAATTTGGTAGGTAGCTTTGTCCTATAGTCTAGATGTGCAATAAGACGGGATTTTTCGAAATTCCCACTACAACACCTGCCATTGGCGAAAAAGGACTTTTTGCTTTCACGGCCATGCCTCGGCCCGCAAAGCGGGCGACAGCCCGCTAGTATTCTATACAACTGATGGCACAAAACTGGGCAAGTTAGAGGATAGTTTGCAGTTAAAAACATAGGTACAAAGTGAGGAACTCTG	2		GTTTATTTTATTGTCTTTAAAGGGTAGGGCATGATAAAATAATAAAAATGACAATAAGGTAGGTAATACCTACATAATAAGATAATAGGTATTTTACTCGTAGAAGTATCTTTATTTTACGAAAACACAATTTGAAATCAATAGAAAGTAATGTAGATTGTAGGTGGTATAGGTAAGTACCGCTAAAGACGAAAAGACAGCAATCTAAATATACCTATCAACAATATCAACAAAAAGTTATGAATAAATTTTAGGTACTTTTAATTATTATGTTATTGTTAATTGAAACATTTTAATTGAATGTACTAAAATAGCACAAAAAATCTTGTTTGTTTGTTTTTGGTTTTTTTAAGCAGAAATCTATCAGTGAAGCTTTCTTCGACATAATGTACATAAGGT…	32759
	Scaffold_2	42013690	42013991	301			>Scaffold_11:23170871	1		TGTTTGGTTCCGTCATTCTTCAGTATCAACTCACCCAAGTTCTGTTTGGTTCCGTCATTCATCAGTATCAACTCACCCAAGTTCTGTTTGGTTCCGTCATTCATCAGGCCACTGTCCTCCTCGGGCGGCAAGTAGGCGGACTCGGGAATGGGCGGCACAATGTTGACACACGGGATGGGCAGGCTGTAGACCCACGCCTCCACCAGCTTGTTGTGGTACAGAATGAAGCAGTAGAGAACGTAGGTGAGCAGCATGAGGACAGACTCGAACCTGGAACCCACGGGTCGGGAGGAGGGTTAAAGAAAATCATTCAAGAAAGTCGAAAAATGTTGCCAAGATCCTGAATTCTTCTGAGCTGATTTTAATAAAGACTTATCTTTTTTATTGTACGTACCCCAT…	12546
	Scaffold_11	16469448	16469749	301			AATTATGAAATTGGCCTTCAGAGTGCCCGAGGCATATTTTAAAATTAAATTCTCAAAAAAGAACCTAGTTTTAATTTCAAGTGTTAACTTGGGGTTAAGTGGCAAAGAATGCCTAAGGCATTAACTTTGCTCAAATTACAAAACAATAGTTATGCACATACTTTTTGATTTTAATTATTACTTCCGAGAAATTTCTAATATTAGAAATCGGAAGTATTTTTTTTTTAGCTTGTTTTG	2		>Scaffold_1:20298555	20
	Scaffold_5	7313153	7313456	303			>Scaffold_7:14692596	1		GAGGAAACTCGTCAGCGAAAATTTCGGTTTCTGGCGAGCTGCATAGTAGCGAGTTCGTGAATTTTCCCCCTAATATTTTTTATTTCTCATTTTTAGAATTTCTTAGATTTTAAGGAACAATTTGATTTCAATTCGACCGATTTTGTGTGGTACGTTAGTGTCATCTCGTTGAAGTGTATGTCAGGACGTTCCAAAGCACCAGGTAAGTGTATTGTAATGACGTTAGATTAAAATAATACATTATGACATGATGATGTAGTAAGCTTTGACATCAATTTGTTAAAGTTAAAGGATTGAGAGTACCTACCCCGCTTGTTAAAAAAAGTTTAAAATCGAATTTAAACCGTAATCCCGGGATCCAAAAAATAGGTGCCTACCTATTGAGTCACTTATTAAATT…	32759
	Scaffold_7	30257825	30258128	303			AAAATGTAAAGAATTAGATATTTCAGTCGGATTTCGACAAGTGCGCAAGAGTTTTGTGTTTTTATATAAAAAGAAAAGAGGAGGGAGAGACGAGGAGAGAATGGGAGAGAAAAGAGAAGAGGAAAATTTCATTGAATTTTAAAATGTCTGTTAGCTTTCTCTCCTCTCTGTTATTTGGAACACACAATGATATCTACTTTTTCTATGTACTCTCTCTTTAGTAGGGTACCGCTTTTCT	2		AAGAAAACAAATTATTTGATAAAAAAATATATATAAATGAACATCTAACGACCAAGAACTACACACTACTGAGAAATACCAGAGCTTGGGCGAAGACAAACCACTACAAGTTTGTCTGGACTCAGGATTGCCGGGTACTTATGAGGAAAGATGAAAACTCGCGAATCAGAAGTGTGAAGACCATGAAGGACCTGTCAATGGATTGGAAGAACGTCACTCGTTCCAGTTCTTCCGAGGAAGAGACAACAGATGCTTAGCAATTTTCAAGTTTTCATTTTTTTTTTTTTTTTTTTCAATTTCATTCATTTCTTTACATTTAAAACTTTAAAACAGATATATTTGTTCACAATATCAGTATAACAACAAAATATAAATTAAAATCTATGAAAAAAATCAGAG…	12672
	Scaffold_3	20521624	20521928	304			>Scaffold_9:19943740	1		>Scaffold_1:41589139	20
	Scaffold_1	3080979	3081285	306			AATATTTTCGATATATGCAAAAACAGCATCATTCCACGACCTTTGAACGGCTATTTCTTTGAAATGGCACTACATATCTGACCAAAAATTATATAGAATGGTTTTTTTTGGCAAGTCCTTACGATTACATATTTTTTCTTTTTTTTTCTTATGGACAAAGAATGAATAGGAAAGTTTTTTTTGATATTCCAAAAGTTTACTCTTTTGGAATGATGTCGTTTTTGCATGTACCGATTCA	2		CTTGAAAATCAACAGAATATTTCAGTTCCCTTTTAAAATTAATTATAAATTAGCATTAGCACAAAAACCGATTATTTAGTAACCTTACCTCAATACATCTCAGAACCATTCAAAGGCACTTAAAGGAAGCCACGTCATACTGCATACTTTATTCACACTTCAAATTTCAAGTTAGGTAAATCTTCCCGTGAAACGTTATCAGCTAACACATTTTTATAATCAACTGTTACTCACGAAACCCTACCCCAAAAATGCCGGACTGGGAAGTTGTTGGTAAGAAGAAAAAGGAAATTCAACTGACAAGGAGAGAGAAAAAGTTGGAAGAGCAAGAGTTCATTAACAGTGCTCCTAAAATTGAGGAACTATGTAAGTAAACTCAGAATCCAGGAAGTTTTAGAC…	32759
	Scaffold_11	14957917	14958224	307			>Scaffold_6:6496678	1		TTCGCGAATCCCGAATTCTCACAGAACGAAAACAGAAAATAGAAATTACCAAGGTCGCGACTGCAGTATCGGCAAGCTAGACTCGAAGAGTCTAGAAAGAATACCGCGTTTTCAATCGACGCCGACGTGTTCCACATTGTTTTCACAACGTGTTCCACAAACAATTCTTGTAATAGTCAGCCATAGCATTAAGGATAGTATTTTTATCGAATGAATAACTGTTTATCATTCACTGAAGGCTTAAAAAATCAATTTTATTGAAGTGATACCTATAAGCGGTTTTTTTTATGTGAACGAAAAGCCTGACGGAGACCGCTCGGTCAACTCTGGTCAACCAAGATTTGAAGAATAAAAAAAAGTGATTTTGGGACTCTGGTTTATTTACATTTTCGGTGTGTG…	13264
	Scaffold_4	5255500	5255808	308			CAGCAATCAATGCTCTTAACCACTGAGCCACGGAGGTCGGCGATCAAAGCTTGAGAACGTTTCTTGGGGAAAATATTACATAGCACATCGTTATACGAGTATACATAACGTCCTCTTGTCTTTTATTTATTATATTTGCTGTTATCATCAGCTTAAATTGGTAATCGCCTAGTCCCCGCTAGTATAAGATAAAATGCTATTTTATACAATTTCAAGTTTTACCCAAGATGATTTCATA	2		>Scaffold_9:12912500	20
	Scaffold_8	14055921	14056229	308			>Scaffold_11:1688279	1		AAAAAATTGAATACACAATTTTAGTCCATTTTGTTTTGCAATCTTAACCCAAATTTATTAAATTTAGTAGAAATATTTGTTGAAATTACAATTCATTTCCCCTAGTGCAAAAGGTTCCATCTAGTGTTGAAAATAACTTCAACAATTGGTAAGTTAAACAATTCAACCTATCTTTACTTTTCTGCCATTTTATGTTCAGATCCTAACAAACTCATTTGGGCTGGGCCTAGGCTTGTTCTAGTTGTTTGCAAGTGTTAAAGTGTTTTGTGTAGTGTCTCCTTGGTCCTAGTTCTACTAAAGTCTGGCTGCAATAGAGTGTAATGGTTGGTTCTACCAAACTTGTGATACTCAAAGTGCCCAGAAATCTCAGATTGGATATGCTTGTACCTAAAGCATTCA…	32759
	Scaffold_12	20482517	20482825	308			CTTACTTACTTATCCGTGGCTTGGGCCTAGTCGACCAAATGTCTGCTCCACAGCGTGCCTCCATTGATTTCGGTCTTGTGCTCTTTCTTTCCATGTTCCTGGATCCATTTCCATCATTGTTACATCCATTTCAATATTATCCTGCCATCTTGTTTTCGGTCTTCCTCTTCTTCTGTTTCCTCTGATGTTCTTGTCATAAATTATTTTGGGAATGCTCTCGTTGTCCATTCGTGCTAAGT	2		TAATATGTTACCTATTATGGCCGGACACGACAGGCCTGTGTCCATCCGTGTCCACATCGTCTGCCAGGTCATTCAGGAATTCACTCATCGAGTTCTTCCTGTGCCGTCGCGGATAGTAGACAAGCAGTTCCGAACCTGGAAAACAAAAAGTTTATTTAAACTATGAATTACATAACCTACTGTTGTTTTATTTTTATTTATTTACACTTTATTTTTTATACAATACATACAACAATAAATTATTAACAAAGATAAAAAAATTAACAATAGGTATTTACAAAATAAGATATATAAAAAAATAATAATAAATTTAAATGTACAATGTATTGTAATCCGGGGCGAAGTAATGCCTTAGGCATTCTCTGCCACTTAACCCCGTTGTTGTTGTTGTAGCCAGCT…	13400
	Scaffold_9	5544238	5544546	308			>Scaffold_11:24467928	1		>Scaffold_4:2653322	19
	Scaffold_3	28496091	28496400	309			CGATTGTTGGGGGGTCTCGAAAATAGGGTTCCCGGTGGCCTAGGAAGTCAAACAAAGAGTCAAATCAACTTATTTTTCAACGTAGAGCCCATTTTTGCAATAAAAATCGCGATTTTTGAAATTCATGTTGCACTTTTCGCTGGCTGAAAGTACATGAAATGCATGGGAACTATGTTTTCCGTAACCTTACACTCTGCCGGGCTGTCTCTTTCTTTGTATAGGCGTTCTTCACACCTCGGCC	2		TGGACAAAACGCACCCGAACGGGCGGCTAAATCGCCCTATATTTCTGCTGGTAAGTAACTATTCACCATTAGAGCTGAGATTTCTATATCAGAAAAGGTAATTTTTTTCAAGCTTGACCAATTTTCATTGTATTTCATGTATTATATGTATAAAAAAGCAAAATACAATGTTTTGTGACACCATACGATTTTATTTATGAGTTATGACTCGAAAAGAATTCAGATTACACCACTGGTGACTCAATGGCAACAAATAGCTCAAAATAAATGTCAAATTTGTAATCATAACTTGAATTTGATATGCCACAACCCCCATCTAAGATGAATAATGAAAAAAATAGGTCAAGCGGGACCCTTCAAAATACCGGTAAATTGGGGCCGCTGGGTTTTAAAAAGTTC…	32759
	Scaffold_1	19438521	19438831	310			>Scaffold_11:9536047	1		CTCAAACTATCATGTACCATTAACCCTTTTGTCTCAAACGTGAACTCCAGTATACAGGAATTTTAGAGGTCTAAAACTCCCTAGGTGTTCAGTTTAGATTTTTTTGAAAACAGATTTGAGTTTAACTCATTATTCTACATCAGAAAAAAATAATATTTTTTTTAAAAATCAGCTTCTTCTGCATTGTGTGACGAAAGGGTTAACCTCACCCAGCCTCTGTTGGGCATGGTGTAGCCAGCATGATGAGGGTTCAAATTTGGATAGTCACCCATTAAAGTCCTAACCTCGCTGGATGTTACATAACTTAAGCACCTGAACTAGAACTGGTGTATTTTACGTTCCATGGCCAATGGGACACTATCTGATACCCCAATTCAAAACTTAAACTACACATACGTA…	13964
	Scaffold_8	14271185	14271496	311			AGAAAAAAGGACTACCTACCTATGTTTGTTTGTTTGTTTGTTTGTTTGTTTGTCCGGAGTTGTTTAGCCAAAACGGTAAGAGATAGCGAAAAATGTCTCAGAATTGACCCCCCCAAAACCATTATTGCTTTGTCCAGAAAAATTATAAAAAGTTTAAAAAGGCATTGCTGTCCAGCAGTACGGCCATGCCTTAGTAAATTTGAAATTTAGTCCCGTTGCAAAGCACGGGCAAACGGCTAGTT	2		>Scaffold_2:49630218	20
	Scaffold_2	23466482	23466795	313			>Scaffold_4:9239881	1		CTCGATCAATTCGCAACAAAGACCTTTTGATTAGCGATTGCTAGAGCTTCTAAAGTTTGATTGGGAGATTTTAGTTTGTTTGTTGATACAATCAATAAATCCCTCTAAAGGTTAGGTTATGCTAACTTTTTTGTTTTAATCATGAAAATAATAGTAATGGAAAGATGATCTACATAGAAACCACTATGATTACATGGTTACTTACCAAACAAAATAATTCATAGAAACCATTTTGGTTACCTACCGAACAAAATAATTCATAGAAACCATTTGGTTGCCTAACTAACAAAATAATCTATAAAAACCATTTTGGTTATTCTTTGTATAGGTGGTCTTCACAGCTCGGCCGAGCTGTTTGACCTCACTAACAAAATAATTCATAGAAACAAACCTTTTTGG…	32759
	Scaffold_13	76493	76807	314			TAGCCAGCGTCGATGGCATGTTGAATACACCGGTTCCCTTCAGAACACCGAAGTTAAGCGACATACAGCGAGGTTAAGACTTGGATGGGTGACCATTCAAATTCTAATTCTCGTGACGCTGGCTTTTCCCGGCCCCACTCAGGCTGGGTGAGGTCAATGTGAGTAGCAGGTTTGTGAGTTTCCTGCGAATGGAGGGTAAAACCCCCGTCGTGATATGACCATGGCAGTTGAAAGCGACGTTAAAC	2		GACCATAGGCCACTTCCTCAATATAACCTTGACATGATCTGGACTACTCTGGAGTATCCTAAACTTCCTGTGACACATAGCTACTTGCCACCTTCATGGGAGTGGATTTCACAATGCTTTCTCTATTTTAAACATATTTTTCCTAAAGCGGCGGACTATGATCTTCTGACATTATGGCCCAACTAAGGCTGTCTGAGTACTCCGTTTGTTTACACAACAAATGGTGGTTCCTAGCCAACTAGTAAATATACAGCGATGTAAATTCTCAAAAAAAAAGAAGAAGAAAAAGAGGGATTTTTATTATTATCTGACCTGGTCAGTGCCGGATTACCCATATGGCGGATTTGGCAGATGCCAAGGGCCCCGCGCTTTAGGGGGCCCCGCGCTTGAGCAGCTTAC…	14704
	Scaffold_13	14924544	14924860	316			>Scaffold_4:7129451	1		>Scaffold_1:25151672	20
	Scaffold_7	20852453	20852771	318			CTCGGCCCGAATTTACCGGTATCTTGGGGGGGACCCGCTTTGACTAACTTTTTTATTATTCATCCTACATCCTAGATGGGGATTGTGACATATCAAATCCAATGATTTTGAGGTGCTGATTACGAATTTGGCATTGATTTGCAGCTGTTACCGTTGAGTCACCAGTGGCGGAGTTCGACTTCTTTTCGGGGATAAGGAAAGTCGTGTGATGTTTACACCAGAATTTTTTTTATATATATAATTTTT	2		TTTTTTTATACAAATAATACGAGTATATCACTAGTACATATAAATAAAATCTCTATCACTCTAGGTAGACTAATTTGTATTGTCATGTAGAAACTACTAAACTATGAGACTCCAAAATATTAAGTGAAAAAATCAATCATTCAAATAGAGATTAGTATACAAAACATATCTATTGCTAGTCAATGTTTGAAGCAGATATTATAGACGTTTTTATTACTGAAATCCAACAAAAGCTTAAGAGGGCTTTCATTTTTGATGCTTCATGAAATATACCCTAGCGACCTTAGGGTCCATTTCCGTATAGGGGTTTAGAAAAGTGGCCTCTATTTGAGCTCTATTATACGTGGTTTCTTTTTGTACATGACCTTTTGATACACCCTATATAAAGGCTCAAAAAGA…	32759
	Scaffold_3	14448478	14448799	321			>Scaffold_9:29943831	1		CACTGTGATGTAAAACTCACCTTCTGGCAAGTAAAACTCACCTTCTGGCAAGTAAAACTCACCTTCTGGTAAGTAAAACTCACCTTCTGGTAGGTGAGCACCAGCTGCACCACAGGCAGGGCGTAGAAGACAGCCACGGTGATGAGGTTCCACACGTAGAGCTGGGACTTGGCGCTCAGCACCTGGTGGCCCTTGCGAGACAGGTCCGTCACGAACAGGAGGGTTTTGGTCCTGGGGCGAACAGAAGAGGCTGTGACACTTTTGGTTGGGTTGGGTGTTTTTATATATTTTGTATCCTTTTTCATTTTTATTGTATAGAGGGTGGGGCAAAAGTCTGGTAACCCCTTAATATCTTTCGAATGGCTTTCTTAGTAAATTCAAAATTTTGTACAGTACACC…	14770
	Scaffold_1	37402641	37402968	327			GGTAAATTGTCTAAGGACCCTGAGCACTGGAGTTCTGAAGTTAGTTACATTTTCGGTACCTACGGAGACTTGGCGGGAATTTTTCACCCGCAATAGTTTTTTTGGGGATATCATTACTTTTTGTGTGCATAAAAATATCTTATCCAGCCAATAAATATGTGAATATTCAACGGTATTTGCAAAATAATTTGTGTAAGGTGTACATATTTTATTTTGGCATCACAATTATCTTTTTTTAATTCCAGAT	2		>Scaffold_2:7620839	19
	Scaffold_7	5826303	5826631	328			>Scaffold_2:38676250	1		AGTTTGTTTGTGCATCAATAATCTCTAGCATTGAGCATCATTTGGCTAACGTACTGGCAAGTGGCGGGATAGAGACCGTGAGCATACAAGGAGACGAACACTTGGATTTATTATTTAATAGTTATCCAATCTAACCTCTGCGTGCTTGTAATACTAACGCTCATAATCCTCTGACATTCAATGTTGTAGCTGAGCTGTTACGAACAAGTAAGCTCGGTGATTTAGAAAAGAGAGTTCAGTTGTCATGATGGTTCGGTGCGCGGCGGGTTCGTTCTGTGCGTTGTTTTTAATAATTTCGTGTAGTGTTGAGTTCTCGACGTGCCTGCTCAAGGATTATAAGATATGTGTGCCGGAGCAGAGCCTGGCGGACTGCAGGAAGATGCAGGAGGCGGGGGCCGC…	32759
	Scaffold_5	10818261	10818589	328			TGTAGAAAAACTCCAAGAACGTATTGTTGGATCAAGATTAAGGTGGTATGGACACATGAAAAGAATGGATCAAACACGCTTACCAAGAAAATTCTATGAGATGGAGATAACAGGAAAAAGAGTGAGGGGGAGACCACGAACACGTTGGAGAGATTCAATTCATCTAAATATTGTGGAAAGGGGTGAAAATCCAGAAAGTATAGAATTAAGTCAGAACTACAATGATAGAATTTGGTGGAGAGACTTCG	2		ACTTGGAATTTATGGACGATAAATTTCCCGGATAACTGCAACAGGGCGTGTTGAAGATTCCCCAAAATTTCTCCTCTTCCAGCCTTTTCCATGTAGTGATGAGAATAGGAGTGGGGGAAGATTAAGAAGGAGGAGCTGGGAAGAGAACGATATGCTGGGTCCACACAGGTGCAACATGCAACACGTTGCTGCAACGTGGTAATTGGAACACTGTTGCAGCAACGTGTTGCAGTTCGTTTTCGCCAGTGATCCATTCTGTTTTAATTCAGTAGTCACGTCCACACACGTGCAATATAGTAGCAACAAAGATCAAAGATGTTTGGTAGAAAACCGACATCCTCATGGATAATTTTTGATCATTCATGTTCGTGTTCAGATTCTGTCCACACAGAGTGAATT…	14900
	Scaffold_4	261501	261831	330			>Scaffold_6:30391612	1		>Scaffold_4:18590382	20
	Scaffold_1	19052768	19053098	330			GGAGGAAAAAAACTGAAGTACTTGCTAATTACTTTGAATCTGTTCACAGACTAAACTTAGACATGGGTTCACGTTACTTCGCTCGCAAAGTAGACAGTACAGTAATTAATTTCTTGTCTTCAAATAATTCAGACTTTACAGAGTCTAACTGTCCGGTAACCACCTCGGAGCTCTTACTTATAATCAAGAAACTACGGCCCAACAAGTCTCCTGGTATTGATAATGTGCCTGCTTTGTGTATAAAAAAC	2		AGAAGTGAATGCTAGAGACCTGCGCCCGTGTCCAGAGCCGCCCACGCCATGACAGAGACGCAGCCGCCCCCCCAGACCAACGGCCTGCCCGACGACGGGCTGGAGGATGAGGACAGAACCAAGATCCGGCCCGCAGACATAGACGCCGTGAGTACCAGGCATACACTGAGAAAAAAAATTATCCTGGACATTCATCCTTGAAAAAATGTTAAAATATAAGGAGGATAGATACTTAAATTAGTATATTACTCACTTCATTATTACAATGTAACAATGTAACTTGTATCGTTGTCTTAGTGTGCAAGGACAAAAAATAATCTTTTCTTAAAGTAATCCCGATTCCATCCTCGTTTAAGGATAACTTACTGGCTAACAAGGATGTCTTTTTTCTCAGTGTAC…	32759
	Scaffold_5	13570777	13571109	332			>Scaffold_12:2483013	1		AGAAAGATACTCTAGATAAAGAAAACACTAATGAAAAGAATGATTCTCCCCAAAGCTCTTTAGTAGATAGTCTGGAAGATCGTCAAAGCCATCCAAAAAGTTCATCCCAGAATGTGTCTGATGAACCAATGCAAGATACTAATTTGGAAAAAAGCAAAGTAATGCTGGATTCTTTGAAAGATGTGGACACTAATGACACTAAATACATTACACTAGATGTTACTGGATTTAGCCAATCAGATAGTCAGGACATCTATCAGGAAAATAATATTGCTCATGAGGAGTTTGATCAAGAAAAAAATATCGCTCCTGATGAGTTTGATCAAGAAAAAAATATTGCTCCTGATGAGTTTGATCAAGAAAAAAATATTGCTCCTGATGAGTTTGACCAAGAAAAAA…	16225
	Scaffold_6	24301701	24302034	333			CTACATTTTGCGGATTGTCTGAGATGGGGATACCCGATGCTAACTGATGAGTTGAGATCTCGGTTTTATCTATTAACTAGCCGTTTGCCCGTGCTTTGCAACGGGACTAAATTTCAAATTTACAAATTTACTTTTTGAACTTTGTATAATTATTCTGGACAAAGCGATAATGGTTTTGGGGGGGTCAATTCTGAGACATTTTTCGCTATCTCTTACCGTGTTGGCTAAACAACTCCGGACAAACAAAC	2		>Scaffold_2:43323929	20
	Scaffold_4	46224959	46225298	339			>Scaffold_11:5664271	1		ACTACAGCATACCTGCTGGGGCAGTTTACATTACTACTACAGCATACATTACTACTACAGCCTACCTGCTGGGGCAGTTCCTCCTTGGCCACTAAGCCTCGCTTGTCCAGCTTGATGTCCATCTGCAGCGGCTCCAGGGACCCCTCCATGTTCTTGCCCAAGCCCTGGCCCGGCTGCCAGCCCATCTTCTGCAGCAGGTGCATGCCCATGCCGCCCCGGACAGGCGCCGCCGTCTCGAACTGTTCCTGAGAGGAGAAGAGAATGGAATGATTATAGTTCGTCTCGAACTGTTCCTGAGAGGAGAATAGAATGGAATGATTATAGTTCGTCTCGAACTGTTCCTGAGAGGAGAAGAGAATGGAATGATTATAGTTAGGGGCAAGGACTCTGAATGTTACA…	32759
	Scaffold_5	39900359	39900701	342			CCCCTGGCACGCCACTGCACAAAATAATACTCTTTAATGGAATGTAACCACCAGGCGAGGTTAATATTCAAAGCATTTCCTACCACCTGACTCTCAGAGTCTTATTATTTGTGGATACAAACTCAAATTAATGAGGAAAAATTCATGCACTGGGTGGGATTTGAACCAACAGATCCCTACACTACTTGGATCTACCAGACTAGAGTGTTAACCACTTGATAAGCAATCTGCACGATGATCAATTTTGAA	2		CAAACACTCTCTGCTTATTCATTTGCAACTTGAAAAAAAAAGAAAAGAAAAAAATATTCTGTTCTTATAATGAATATATGGCTGTTCTAAATGTTGAATATAAATTTCAAACAGAATCCATACATCAGATAATCATTACAAGTTTGTGCGCCATGCAGCTTTGTGTGTGAATGACATTGCGTCCCAAGCTTTGCTATTTATGTACTTTAAATTATATTAGCACTGGTTCAAGAACAACATCACACTCCAAAATTATTCTCGAGAACAATTTTGAAGTGTGATATTTAGACACCGTGGCCTAGTGAGTTAGCGCGTTAAGCATTGCGCGCATGATGACTTGGGTTCGATCCCTAGCGGAGCAGGAATTTTTCTGCTCTGTACTTGTATGTTCGGGGTCCA…	16823
	Scaffold_3	22750276	22750623	347			>Scaffold_2:33636434	1		>Scaffold_2:27064249	20
	Scaffold_2	54631774	54632122	348			GTTACATTAGGATTTTTATCATCAGATACAAGTATAGGCTCTCCATTGAAGACATGAATGCGCCCTCAATTATGTATGAAAGATACGAGAATATATTCCTTGCAGACAGAGGCTTTATTAATATGGAATACTTCATGATGTATCGAAAGGAAAAAGATGAGAGAATAATATCCTGCCTGGAGTTACATATAAATAAGAAAACAAGAAAATAATCTTTCTTTTATGCCTGAAACTGATTGTACAGAACAAG	2		TTTTAACTTTTCGATGAGGTACTCTTACTTTATCACCGTGATCACTAAGAGTGGGATGTGGCAGCTCTTAGGATTTTGAGAAATTTTGGTCCACTACAGGTAAGAATAACTTACAAGTAATTAAAAAAAACGCTCCCTTTTAAACAGCTTTATTGAACACTATGGATACCGCAATATTGGTTGACAAAAGTTATAGTTGTTTTTATCTCCGATAAATTTCAAATATTAAAAATTGTGTTGGTTTTTGTAAAAAATAATATTTTTTGCTCCGATTTCAATTTTTTTCATATTTCTGGACCTTTCAAAACCTCCTGAGCAACTTTGATTTTGTATCGGTCTGTTAAATATATTCCTTGTAACTTTTAACGCGAATATCTCAGAAACTACCGAACAGAAATT…	32759
	Scaffold_5	34657281	34657631	350			>Scaffold_4:35062717	1		TATACGAACCCCCACCTTACGATACATTTTTGGAAATTTCTTTAAATAAGAAATACTTTGGTTTACCGTACAATATTTAAATTCAACCGAGGAAGCCATTCGAAAGTTATTCAGGGGTTTCCAGACTTTTGCCCCATCTTGTATAACAAAAGTTTTGGGCGCAGCACAAAACTTTTGAAAAAAATCGGTGCCGCCAATGGCGGCTTCTGGCGGTTCTGGCTAAACGATAAGAGATATGAAAAAAATATAAGTACAACTTGATCTTACAATAAAAAAATAACAGGGGTCTACTCACATCATTTTTTTGATATCTTGAACTTTTTTCACATCGGCCCCAATTTTCCGGTATTTTGTGGGGTCCCGCTTTGACTAACTTTTTTATTATTCATCCTAGATGGG…	17718
	Scaffold_12	3230356	3230712	356			AATACACCAGTCCTTGTCAGATTACTCAAGTTAAGCAATGTCCAGCGAGGTTAGGACTTGGATGGGTGACCATTCGAACTAGAACGGTCGTGATGCTGTCTTTTTCTGATCCAAACCAGGCTGGGTGAGGTTAATATTGTAGGATGAAACCCCCATCTCAAATGACCTAGATGTTCGAAACGTTAATCGGAGAGAAAAAAAACTTGAATTAATTTTAATTACTTTGAACAAAAGATGCTGAACAAAGGAG	2		>Scaffold_13:17725438	21
	Scaffold_11	28106335	28106692	357			>Scaffold_4:13683727	1		ATGTGCGTGCTGTCCAATCCTGACCAGAAAGGAAAGATGCGACGCATTGACTGCCTCCGCCAAGCCGATAAGGTGAGATATGCGGTCTTTTTTTAAATTTTGTTCAATTATTATTATTTCATTTTATTTCTCATATTTATACATATTATGGTAATAAAGATTATTCTATGGGCTAGCAGTAGCAAACATAGAAGTAATTAATTGTTGATAAGGAGATGTTGATATTATGATGATATTATTATTATTATTATATGATTCTTTATTAGATATAAAAGGACATTATGTACATATAAATAATAATATTAACAGTGAAAAAATGAAAAAAACAATATATACAATAAAAATGATAAAGAATAGAGAATATTTGAAAACATATGTCCTAACTGAAGGGCGGGGTTA…	32759
	Scaffold_2	8810458	8810816	358			GCACGAGAGCATAGCCAGCTACAAGGGCTACGTCCACAGTGTGGTGGGCTTTTTCGTCGTGGAAGATCACGTGCTCAACACCACGGAGAATCTCATCAGCCGGGCCTACTTGGATCAGCAGTGGGAGGCAGCCCTGGGCAAGATCAGCAATGCCTTGCGTACGCAGACAGCTTACTGTACTGACGCTACACTTCTGCTGCATATCAAAGACTTGATCATGTTGTTCATTACAACATTGAGAAACTATGGGT	2		CTTAACACCTCTAATGCCCATGACGCCTGGGTAATAATAATGTAAAAATAAAATAATAGATTATTAATAAAAGACCTTATTTCTACTGGCTGCATAGAACTTTTAAGAGGGTATGGTGGGATGATTTTGGGGGGGGGGGGACACTGGTAAAACTTCTCACTTTTCTGATGTTTATAATGATTTATTGGAGTGGACGAGTATTTTATCTGAGGAGGCATTTACAGAAAGTTATTTCTATCTTCTACTAGTCGAACCTGGCTATAATAGAACCCAAGGGACAGAGCAAAAATATCTATTATAAAGAGGTTTCTAATAAGCCAGTTCTCTATTACACATAAACAGGTGACGCAGGGACCTGAGATTTTCTCAATTATAAAGAGGTTTCTATCATATCCAAGT…	18507
	Scaffold_11	19612690	19613049	359			>Scaffold_2:46773929	1		>Scaffold_9:11244136	20
	Scaffold_2	16840513	16840874	361			GGGCTTACGTACAAGCGTTCTGTGTTCTGTGAGTTTTCGCAATGTCGGCAATTGATTGATAGGTGATACTAACGAGGATTCTTCTGTCAGTTTTGAACTTCAAATGAATCTAAATTACATGAATAATCCGAGTATCGAATAGTGTAGACCGAAGAAACCGAAGAGAAATTGCCTACTTACTTTAAATACTTGCCACTGTGATACCAATTTTATAAACATTTTGTTGTGATTCCTGGAACAGTACCGTTCATTGT	2		TAAAGAAGATTTCAAATGTATTTTGATGTTATTTTTTATTTTACTTTTTAATTTGCTACTAATCTACTACTACTTACTAATTCTACTTGCAATGTACAATAGCTATGATGATTATCTATGTAAATTAGCGAACGCGTGCGTTAAATGCATTAAAGTAAGAGCTAAATCCAATATGTTCTTTGTCCATCCATCCCATGGCACGAGACCAACTTCCACTGGTCTTCTCGTTGATGACTTGTTGGAATCGGACTTGTTTTTTGGGAGCGCAGAAGTCTTGGTTGGAAAGTCTCGAGTTATCTCTGTTGTTGGAAGACAGAGAGTATGAAGCTACGAAGTCTTTGGCATCTCTAACGACACAGTTTCTTGGGGTGGTAAAGTCGGTGGCTTTTTCACCGTTGA…	32759
	Scaffold_12	20100422	20100785	363			>Scaffold_3:44676038	1		AAGCATAATAAAATGTTGAATGTAGACTTTATTTTGTTTTAAAAAAACTGTATGCCGTCTTAATTTTGTTTTAAAAAATTGTATTCATTCAGTCTTCATTTTCTTTTAAAATGTGTAAATTGTAAAAACTTGCTATCCAGATTCTAATGAATGGGAAGTATTGTGAGATATTATAAATTATTTCATTCCAGTAAAACTTAGATGACCCAAAATGAAAACTTGGGTATAGTTCACAAAATAATTACGGTAAAAATGTAAAATATGAAAGTAAAATGAAAATCAGTAATTTGAAAGTCCTTGAATGCTGAATTTATCATGGGAGTGACAGTCTCTATCCAACTCTAGTTGAAAAGTTGATTCCTTCTATAGCACGTATGTATTTCTTTATGTAATCATTTA…	18541
	Scaffold_1	64981422	64981791	369			AGAATTAAAATTGTCTGGTCACATCTTCAAGTTCGGAGTGAAGAGTTTGTCCCATCTTGATAGAGCTGGCAGATGAGACAATAGAACTAGGTTAAATTTACATATCTAATGTTCTTTCTAGACATTTTCCAATTGCGATTGGCTTATAGTTAATAAAGTAGGTCAAAATATTGTAAATAAAAAATGTATTATTGTGTTTAATTCGATATTTTTGGTACCTGTTCAGAAGCTATACAAATTTTGTACAACTCTCAA	2		>Scaffold_5:17629683	20
	Scaffold_3	21104265	21104645	380			>Scaffold_11:5228393	1		AGAAAGGAGAAAGGTACTATAATAAATTAATTTAATCATTCTATAGTAGTTATATAAAAAAGCATTCACTTTATGAATCTCATTTGTACTCTCAAAAATATTATATTATCTCCAAGAAAACCCATACATTTTACTTCCGAGAAATTTCTAATATTAGAAATCGGAAGTATTGTGTTCGTTTTTGTAAAAAAAATAATATACTTTTTTGCTCCTATTTCTGGACGTTTCATGAGCAACTTTGGTTTTGTGTCTGTCTGTCAGTGTCTGTTAAAAATATTCCATGTAACGCGCAAATCTCGGAAACTACTGAACGGATTTCAATGAAATTTTGTACACATATAGGAGACGTCCTGTAGATGGTTCCATTTTAAATTCATCAAAGTCGCACTAGCGGTTCTG…	32759
	Scaffold_7	31030241	31030626	385			TGAAATTTGACAAAAATTCGGCCAAAGTTTGCTAAATGTCGTCGGTTTTCTTGCTTTTATTGAACTTTCGGTGTCAATTTTCTGTGTAAGAAATCGTTACTTAAGTTGGTGATGTGCGTAAATTGTACTTTTTATCATAATGTTTCCGAAATCGATGATAATCTGATCAAATCAAAGGTGTTCAATGAGCTCTATCAGATAGTGTAGGACGAAACTTCAATAGTCTCTTGTTAAATTAAAATTTCAGTTCTAAAC	2		CGGCGAGTGAGCACGAGGGACCACAAATTTCAGAGCCCAACACTCATACATTGCTCCCAAGGACCACAAGAACCTGTTCCCTATGAGATACACATAGAAACGAATACCATAGGGAGTACTCATGTCTTCCAAGAAAAGGAAGGTCGTGAATACCATATAGAGTACACAAGTCGACAGTGAAATTTTGGGTGAGTACCATATATGGTACTCATGTCCTCTGTGAAATGTCAGCTGAGGACCATATATGGTATTCATGGGCTCAAAGTGTTAAGAAATCCTCAAGTACCTACATCTCCATATAAATTCCTTATCATAGTTTTGCAGCCCTGAAATAACGTGATTTGTCTTAGTGAAAATAACGACGCTTCAAGTAATGTGAAGAGGTTCAATTTTGATATT…	19315
	Scaffold_1	45482725	45483114	389			>Scaffold_2:44189047	1		>Scaffold_2:24232845	20
	Scaffold_9	12063668	12064062	394			ATTTATTCTTATGACCAAGAGATTGTATACCTAGCGGTTAAATAATATTTCAGTTTGTGCTTTACACGGAACAGTATAGATACAATGCAACAGAGAACAACGCAACAGTATAAGAATGAAACTAATAAAATTGTCTTTAACTTATTTCATGTATCCAAATATTACGAGCAAATTCTCTTGAAATGTACTCAATCAATTGACCGACCTCAATAGCGGGCTCGTAAATTGGAGGTCGGTGGTTCGATCCGCAAGAATGGCAC	2		AGCACCCAAGTTCACCTCCAGAGGACAGACCTTCCGAGTGGTGATAGGTGACACGCTGGTTCTGCCTTGTGAAGTCGAAAACATAGGTAAGTCCATAAGTTTTATAATAGACTTTCAAGTATTTTTTTGTTTGTTGATATATTACTGTTGATATCCAGAAGTCAGGGCTTGCGGGCTTTCCATTACTTTGCATCTGTGAAATTGCTCCTCTTCCAACGACAATGTATCATCTTGTCTTTCATATCATTTCGCTGTCATCTCATCGATTTTAGGTTTCTAAATGTCTCTTTCTTGTAGTATAATGTTAATGTATTTATTTTCATTTGAGAACACCACCCTGTGGAATCTGTCTACAGCTGAAGTCTCCTTTTTATTTTCTTCATTTTAATATTTACTCTT…	32759
	Scaffold_9	12230717	12231124	407			>Scaffold_3:13244011	1		CTCTCTCTCATGTAGACACCATAAGCTCTTCTTTTTCTCTCCCAAATATCTAACCATGTTTGTGTGCATGTAACTCCTAACCAACTATTGAGAGAAAGAGAGGGGTGTTTCCATGAGAAGGAAATATCTTTTGAGGAGGATAAAACCCAGAATGAAAGGATTGGGGATGGAGAGGCACCAAAGTTTGAGCCTAAGTATAATGAGTCCAGGGGGAGAGATTAGGGTTGCTAATCATGCGGACCGAATTATAGGCTAGGCAAATATTCTATCTTCCTTGTGGTGAAGGAGATGTTCTTGTAATAAGAGGATTATATCATGATAGGGTGGTACCTATACATTGTAGTTGTTTACAGTCTATGCTAAAGTTTAGCAGGAGAAAAAACAAAAGATCCCATGCAT…	19848
	Scaffold_1	46400973	46401390	417			GATGATTTTTATGATAAGAATTATGTGTATATTTAAAAAATTCACACAGTCAAAATGAAGTAAATAAAATTGTGGGTTCATGTGTATGGAGGGGTGTAGGAATAAAAATGCATCCATATGATTCTAAAGTGAAACCGCAAGAATGAAAGGTGAGATTCCAGCAAATATACCTAAGAAAAATGGCAATTGGGTCCTCTGCACATCATATACACTACCCTAAGTATTAGGCGGCCACAACGAGTACCCTGGCCTATACCCTACACA	2		>Scaffold_2:43214203	20
	Scaffold_4	12574954	12575372	418			>Scaffold_2:49931413	1		TCATAATTTTCAAATGAAAATCAGTTCAAAAACAAAATTTCTTATCAAATTTTCCTGCATTTAATTGTTTCGATAAGATAAGGCTAAAAGGTGAGGTGATAGATATTGAGCTTTTTGCCTGTGTGAGCGTTTCTAGTTTCTAGAAAGCAAAAACATCATCCGAGCCCACCCGTCTCGTCTTATCAGTGATTGCTTATCAGTGATCAACAAGAACCATGCAAATTTTTCTCACAGAATTCAGAGCTGATCTGAAGCTCTGTAGTGCACTATCACCACTATCTTTCTAATTTAAAGTTTAACTTGAAAGTGTTTTAGTCAGTCCAATAGTCCAAGTTCTTGTTAGCAACCTTTTTCAGTGAAATCTCAGCCATGTTCAATTTACTTCCCAAAACTAAGTCA…	32759
	Scaffold_5	8411732	8412153	421			GAATTGCAGGAGAGTCAATACCAATCTCCTCCCACCCCTCAACCAATCTACGAGGAAATTCAGTGGTGATTGTGTGTGTGCCCTATTCATTATTAGGCTCATGGGCTGGAATTTTTTTCATTATTATTTCTTTTTAAAGATGAGTGTTTCACAAAGCGGGTTTTTCAATTGAACGAAAAACCTGAACAAGACCGAACGGTCAGCTCTGGTCAACCAAAAATTGAAGAATAAAAAAAACTGATTTTTGGGACTCTGGTTGATTTAC	2		TATATGTAATGTTTCCATCCGTGAGACCGATGCGTAGAGCCAACCTTTAGGTTTCCTTTTTTAACCTTAGTTTTAGATACTGTTTTATTTTACTAGACCTAAGTTTTATTTTATATTAGAATAAGATAGGGAAATTGTGAAAAATGGGTAGTTCCCGTTAATTAATTTAGATTTTTAAAAAATAATAATAATAAACATTATTATTATTTCTCTTGGCTCCAGGTGAGGATAACCTCAGTAGAGATAGACCCTGCGGTGTGCGAGGTGGCGACGCAGTACTTCGGCCTGGAACCTTCTCCTATGATAGACATCCACATCACGGACGGAATAGGTGCGTATAGTTAGCAGCACTGTCAGAACAGACCCTTACAGCCGTATTTATGAACAGAAAACGCCGTC…	20032
	Scaffold_10	29622954	29623376	422			>Scaffold_3:30631326	1		>Scaffold_2:36740977	20
	Scaffold_11	10079925	10080351	426			TCTAGTACAATGCGTGTGGGGAAAGATGTGACTTAATTTTTTTTAGTAAACTACTAGGATTCGATCAATGATCAGTTTTTTGTATACATAAAATGTAGTTAGAGTAATTTTAGCTATAACTAAAAAAATGGCAATAATCAACAAGAAAGGAGCAAACAGTTATTACGTATACATGTTTTTGAAAGTATTAGCGCACTTAGATGATTAGATTTCAATAGAAATTAAACAAATAAATTATTTGAATAGAAATGCAATTGCAATCAAG	2		GTTCCAGTGAACACGTGACTTGAAGAATGCACGTTGCATGACGTCACAAAAAAACGTGCTTCTTTTCAATCTTTTCATTAGACGAGTTTTTTCTTTTGAAATTTTTACCCCAGTGTTATGAAGTTCAACTGAAGAGTGTTTCAAATTTCTTATCATTCTTATCAAATTTTAAAAAAATATCTTGATAATTTTTATTATTATTAGCTATCATTATAAATACATTTTATCAATTTAAACTTTTGTGACATTTGTTTTACACCATTTCGATAAATTCTTAAAAATGAATTCAATAAGCCATAGAGATCCCCTTTTTACTGTGATAAAATGGAATGCTACGAAACAATGCAATAGGTACATTTGCAATAGTGATTAATTTTGTCAATTTTATTAATTAAGTGG…	32759
	Scaffold_11	12655927	12656365	438			>Scaffold_1:22342968	1		ATTACAGTGCTGGCAAAAATCCTTTCCTACTAAACTTGCAGAGTAAGTAATGTTTAGCTTTAGACAGAACTTTAGTTTGTAGTTGTAAGACTATTTTTTTACGTCGCTTTTAACTGCATGGCCATATCACGATGGAGGTTTTACCCTCCATTCGCTGGAAACTCCCAAACGAGCTATTTAACCTCACCCAGCACGAGTGGGGCCTAGAATAGCCAGTATCACGAGGGTTCGAATTTGAATAGTCTCCCATCCAAGCCTTATCTTCGCTGGACTTTGTTTAACTTCTGTGACAGAACGAGATGCTGATTGAACGCGCCATCGACGCTAGCTATAACCTAGAATTTTATGTGACCACATACTAGTATGTGTGCACTGGTAGTCAAGTGGTTAACGCGCTAG…	20232
	Scaffold_2	48210687	48211125	438			CTAACTACAAAGGTGTTTTATCTGTGTTTAATATTGCTTTTAACTTGGTGGTTATATGATAACAGGGGTTTTACTCTCAATTCGCTGGAAACTCACTACTCAAATTAATCTCACCGAGCCTGAGTGGAGCCGGTAATATTAGGAGGGTTCGAATTGAATGATCACTCATTCAAGTGTACTAGCCTCACTGGATGTTGCTAGACTTCAGTGACAGAACGAAAACTGATGGTGTATTTAACAGAATTTGACTGAAAAGTTGAAGGTTAC	2		>Scaffold_3:16477859	20
	Scaffold_12	5077731	5078170	439			>Scaffold_13:12027545	1		CCCTTACCTGCGGAGGTGCTGGCTTCAGCTTTGCTACCAGCAGCTGAGGTGCTCGCTGCAGCTTTGCTACTAGCAGCGGGCTTCTTCTTTGCCTGAAACAAACGAAAATAAGTTGTTCAGTCAACCACTCAGCGGAAGGACATTGTGATTGGATATTGCGCATTTGAATTCTTATTTTTTGGTATAAGTTGAGTGAAATCGATAGTAGTGTTGTAAAACACCTATAAGCGGCGGGTGTTTGAAAACACATAACTTGGAAAAAGTGTTGGGTGTTTTTCTCCAAATCAAATATTGTGTTTTTGTCAGTCACGTGTTTCATTGAAAACACCTCTCTGGTTGGAAGAAAAACACGAAACACTTGATTCCTATTTGGGTGTTTTCAAACACCCACCTCTTTTA…	32759
	Scaffold_4	2718660	2719103	443			GGTTTTCTGACAAAAGATTTAAATATTATTTTTTTTTTTACTAAGAGCTTTAGTACAGACTTATAAAAATAACAAGCCTTAAAGTCTAACACTCTTTGAGAAACGTGTAACATTGTCAAACAAAGTTTTGCATTGCCAGTTACACCTATCTTATCTACTTAGCACCAAATGAATCTTGCTGTACCAATAATTATGTGAAAATAAATGGTGAATAAAATAATTACATAGTCTTAATTATAACAATTAAGAAAAATATAAATAATCAAG	2		AGATTGTCTCGCCTTCATAAGATAATTGTTGCAAGACTTAATCCAATTACCCATACATATATTCTCATTATTTAAATTCTATGCAGTTCAGAAGTCAAAACAAAAGTGACATTGATTCTATGTTCAGCGACACGTGTCGTGCTCAGAGTTTCGGCAAAAATTAACAGGATAGACAATTCTTTCTACTCTTCATGTCGCCGTCGTTATAGCCGAAGTATTTTTTCATTTTTTTGCACTGAAGTTTAGGTCGCTATAAGTAAAGGCGTCGTTAAAGACAAGGTCGTTACAACCGGTGGAAAATCAATAGAACAAGATAGGGCAAACCAAGGGACTACGATATTTGGTCGCTATAACCGCTCGGTCGTTATACCGGAGGTCGTTATAGGCGAAATTTACTAA…	20853
	Scaffold_11	17399809	17400252	443			>Scaffold_8:3380845	1		>Scaffold_5:26875183	20
	Scaffold_4	46943701	46944167	466			GGAAATTTATCGGAAGTAAAACACTCGTATGAAGTTTGCAACTTCAGAATGAAAATTCCAGAGTGACAAAATTTACTTATTCATACAAATCTTGTTTTCCTTCTTAAAAATGTCTTTTTCCCGTTTTCATCAGCAAACTTTAAGCTCCATAGCTCAAATTTAGCACAACTGCACTTACAGAAAAAAAACTCTCTTTCCGACCAGATCAATAAGCACACCTTTTACAGTTTAGAATGCCACCCACGTTCCACACATCACTATTTATTT	2		TGCTACTGGTTCACTGTTGAGTTCGGCCTTTGCCGTCAAGATGGACAGCTGAAAGCGTTCGGCGCGGGACTGCTCTCTTCATTCGGAGAACTTCAGTACTGCCTCTCCGACAAGCCTCAGCTCAAACCTTTCGAACCCTCGGTCACCGCTTTGCAGACCTACCCCATCACCGAGTACCAACCACTCTACTTTGTGGCCGAGAGCTTTGAAGATGCCAAGGAGAAAATGATGTAAGTATGCTGGCGCGGTGGTTTGGCAGATAGGTTGTCCTGGTAGCTCATGTTAGTTGGTGGTTTGGTTTAGAATCGCATACTATTTAAGGGTGTTTAGAATTTAATGATAAATATAATATGTGTTCCATTGCTTTATGTTCGGTTATGTTTTTGAGCGAAAGATTTG…	32759
	Scaffold_13	1941830	1942299	469			>Scaffold_9:27701348	1		GGAAAAAAGATGGTCTCGGAATAAGATTGATAAAAATAATGTCACAATTAAAATGGTACAGAAACCAACAGTAAGACCTTAAATCCTATGGTATCAACAGGATTCAAGACAATACCGAAATTGAGATGGAGGGTCTCCCTCTCCACTCATCTAGAAAGAAAAGGTCCAATAGGAGACGAGAGGACCCGAAAGTCCATTGTATGAACACGAAGTAAATTCCGAGTAAAATTCCAGACGTGACAAGAAATTGAAAATCAATAGATAATTCAAGTCTAGGTTTTAACACTATTTCTTCAGGTTAGGTAAGATTTCAAGCCTGGTTGTCAACACTTTTTCTCCAGGAACAGGTTTTTCAAGTCTATGTTTCACGCCTTTTTCTTCTGGTTCTTGGCGTACGGC…	20888
	Scaffold_3	41365256	41365729	473			GACATGAGCTCGCATTTATAAGAACAGATTATTTTTTTAGTACACCCCTACATCATAAAAATAATTTCGACGGACACATTTATGGGGAACCTCTGATGAAATCTAATTTTGACCATAAGTTGAGAAACCCTATTTTCTTTTAAAATTTGTTTCTTATTATTCCCCTACATCACAAAAAAAGCTGTCTGCCAAATTTCAAGTCATTCGGCTCAACCGTTTTGAGAATCTTGCAAGACGCTAAAAATGTCTACCTTTGTCCATAAGTTGA	2		>Scaffold_11:7686089	20
	Scaffold_1	25207245	25207736	491			>Scaffold_2:25462544	1		AACAAATCTACTGGACATGTCGCAGGGCCAATTTGGCGGCCGCTCGCTTCGCGTTCTTCTTGTTGAGGCCGAGCCCGATGAAGGTTTTCCTCGCGTTGGCCCCGCGGCCGAGGGTCACTGTGAGGGGGACGACCGAGCGGCCTGCGGCCACATCGGTGCGGGCCGCCCCGAACTCCGGCCAGCACATGAGCTCGTGCAGGAGGCGGATCGGGTTCTTGGGAACTTGGCGCGTGAACGCGTCCAGCTCCTTCGACATGATGTTGTAGAGCACGTACCTGAGAGGGAGAAAAAATATTTTTATTTTTTTAAACTCAAGAACAACCGTTAAAAGATCCACACGGAGAGTTACTAGATCTAATATTAATAATACTCTTAAGTGGAAGGTAACCACCAGGCGAG…	32759
	Scaffold_9	12757561	12758056	495			AAAAAATATTATTATTAACATTGGTCCTGTTTTAGACAGAAAGCCAAAATTCACTGTTTTGAACTAAGAATTTCAGGGTATTTGAAAAGTTGTATTGTCATATGGGTTGTTCTATTTCAGATTTCAAAGTTGAACCCATAGGCTCACCCTGTTAAAGTCAAAACTTTGAAAATCCCTGAAAAAAGGTTTCCCTAAAATAAATTGTATGTGCCTTGAGTTACTCTGACTTTTTCACAGTTTACAAATTGAGGCTTTTAAGTAATTTTTTG	2		CCACTCCCCAAAAATTTGGAGATATCAAGAAGAGAAAAAAGTCTTACTACAAGAAAAAATAAAAGAAACCATTGAACAAACAGAAAGAACCCCCCAAGATACGATAAATCTCCTGCAAAACATCTGCGAAGAAATTTTCTCCAGGAAAACAACCACCACCAGGCGAAAGCCAGCATACTGGTGGAATTCAGAAATTGCTGAACAAAGAAAAAAGTGCTTTGCACTCAGAAGAAAAATTGTCCGAAATAATTCTAAACGCCCCAGAGATGTAAATGAAATAACAACGACAAAAAAAGAATATTCTGATGCAAAAAAGTCCCTCAGAAAGTCAATAAAAAAATCACAAACAGAATCCTGGAAGAAGATATGTCTAGACCTAAACGACAATGTATGGGGAAC…	22038
	Scaffold_10	1449394	1449896	502			>Scaffold_10:3123978	1		>Scaffold_6:6276624	19
	Scaffold_4	5266105	5266624	519			TAGAAATTGCTGAAGGAAGCTAACTAGAAATTGCTGAAGGAAGCTAACTAGAGATAAGTATGCGGACAGCTTTGAGTCCACTCTGGCGTCTACCATGGAACTGTTGAGTCGGAGGAAGAAGCAGAAAGTGCAAGAGGGAGCTAACTAGAAATTGCTGAAGGAAGCTAACTAGAAATTGCTGAAGGAAGCTAACTAGAGATAAGTATGCGGACAGCTTTGAGTCTACTCTAGCATCTACCATGGAACTGTTGAGTCGGAGGAAGAAGCAG	2		TTGTTTTATATTTGTTTTTTTAAGAACTTGAACAAACAGTGATTATTAGATCCTTCAAAGATTTTGATCTCTCCTGGCCATTTTTGAGACATTGTTGGATTTGTGCATCAGAAATAGGTATGCCTCCTGAAAATTTAAATGAATTAATTATTAATTCAAAAAGTTAGTGAAACTGCAATATTCAGGTTGATTTAATATTCCATATTGTCACTAGATTCAAATATTAAGAAAGTATTAAATCTTCATTATGACAAGATCAGACCTAGAGGATGCCCAAGAAACACATGGGAGGGTGGTGTAAAAGAAATACTACAAGAGATCAATGTTCAAACAGACTATAAAACATTAGCAGAAGATAGACAAGAATGGAGAAGGCTGGTGTGGGAAGTCAAGGACCCT…	32759
	Scaffold_9	11930878	11931415	537			>Scaffold_6:873521	1		TAATGCGAAAGCGGTTCTCGGGCACAACTGCCTTTTTTTCTTCTTTTTTTTTAAAAAAAAAGTCTGATCAACACTGGACATCGAAAATTGCAGTACTATGATTTTCTATGGGGCAAAGAACGTAGAACAATGCTGGCTATTCCCGGCCCAAACCTGCCTGGATGAGGTTAATGTGGGTAACTGGTTGGTGAGTGTATAATTCTTGTGAGTGTCTGAGTTGCCGCTCCTGTCTCCTCTTTCCTCTCCTGATCATTTCGTGCTTGAGTTGATAGTGGAGGGAAATATTTTTAAACCCTCACAAAAGTTAAAGCCCCACATCAAGAAATCCGTGCCAAGTCAGCTGGCACCACTGCAATTTGGGAGATCTCCTGAAAACTTACCCTCTCGCCTTTTGGAGTG…	24125
	Scaffold_11	23449967	23450532	565			CCAAAACCTTGAACGAGTACGTGAGGCGATAATGCAGTGACCTAGGCGCTCAGCTCGCAAACATGCTGCTGCTCTTGGCATATCAGACCGTTCATTGCGGAGGATACTTCATAAAGAACTGCATTTTCATCCCTACAAAATGGTAGTGGTGCAGGAATTGTTCGAGCGAGACTTTATTCAACAGCAAAATGCATGTGAAGCCCTGATTGACTCCTTACTTCCAGATGCGATAGTTTTCTTTAGTGATGAAGCCCATTTTCACATTTCAG	2		>Scaffold_1:15604255	20
	Scaffold_2	55599160	55599728	568			>Scaffold_6:14213624	1		GTTAGTAGGTGAGATTTATTTATCTGTGAATCTTACATCGTATGTTCGTTATCAGTCTTCAATTACTCCGCAACTAAAGACGTTTTATCACTCTGTTACTGACTAGTATAGCGCGGTTGTTAATCGTGCATTTAATTTCTTGTTATAATTCAGTTGTAACAGTTCAATAAAACAACAGTCAAGATTATTTTTCAACATTCGCTTTTTCTTGGTGGAGTTCTGTCTAGATGATAAATAATTTCATGTTGCTTTAAAATTTATAACTACCTACTAACTATTATATCTGAAAGTACGTGTAATTAATATGGCTTCAAATACCGGTCGAATTATTTGTGTTTCAAATCGATTGCCTTTTGTTCTCAAGAGAAAAGAAGATGGATCCCTCATAAGAATTGCCAG…	32759
	Scaffold_11	15105295	15105867	572			GTTTATAGGAACTGGCTGGTCTAAATTTATAGTCTTTTAGCCAGACAATGGTAGTGACTCTCCTCGGATCTTTTACATGACAAGCAAATATAATGTGTTTTGTTCTGCTTTGCCCTGATAGACAGCTTTAGTTTTTTTTAATTCTGTCATTAGATAAACCGATGTGCTTAAAATTAGGAGAACTATCCGAAAGTCTCAATTTCAACAGACTTGAACCATATTTTTGAGTAGGTGAGGATCACATCTCACCAGTCACTGCAGTGTTATGAG	2		AATTAACAGGAATAAAAAATATAGTATTCCATTTAAAATTCGCGAGAAAAATGAAAAAATATGGCCTAAAAGCCGGAAGGGCCGACCGGGGCCAAAAATAAATATGACCACAGGTTGGGCCATAGGGCACTTCCTATACCTAGGACTTTACAGAATTGAAAAATTCCTTCGCGTTCAAAAGTTACGAGGGGGTGGCCACCTTTTCTGAAACATACTGTATAGTTGGTAGCGTAGGAATCTGTTGGTTCGAATCCCAACGGGGTTAAGTGGCAGAGAATGCCTAAATCAATAACTTCGCCCCGGATTACAAGACAAATGTACATATAAATTTAAATATTTTTTTTCTATATTTTATTTTGTAAATTTTGTTAATTTTTTTATCTCAGTTAATATTATTGA…	24567
	Scaffold_3	17464520	17465097	577			>Scaffold_4:30887381	1		>Scaffold_7:16454930	20
	Scaffold_9	16849295	16849875	580			CTGAAACATAAGGGTAAAGGCAGAAAAAGAAGAATTTTTTTGAGAGTTTAGTAAATAACATTTTTGGCAAAAAAAGAAAGAAAATAAATTGCCTCTTGTAACCTATTGTGTTTTAAAAAGGTCTTGTTTTTTCATATGGAGCTACTTGATACTTGAAGGTAGGTTCTTAACCATTGTCCAACAAATCTTGATGAACTGAAGATTGTTAAGTTAGTTCGTCAAGAAAGTGCACTTATCCCTGTTGAAATGTTGAAACGCGTTTCACAGAAGC	2		CTACGTGCCGTCTCCCACCTCTCTCATTTGCTAGAGTGACGGCCCTAGAGTGAAATCTCAGGCGAACCCCATCCGAGCCCGGCATACAGCGAACCACTGAAAACTAGTCACGAGAAGAAAAAAAATTGTTTTTTAATCGCAAGAAAAAAGAAACTTTTCGAAAATAACCTACTAAAGTCGCGAAAAGTTTTCGTAGTTTTCCTTCGGTTTTGTGTCTACTACTTTGGAAAATTATCATGTAAACGCTGTAGTATTTGAATTTTTTTTATTTCTGTAGATTTTCCGGGATTATCCCGACAGCTTTTTTTTGTGTCGAAATAAAGGGTGCGCGCGACCGTAACCACCGATCATGAAGTGTGCGCTTAGTCTGATCGCCCTCTGTCTGGCGGTCCTTCGGGT…	32759
	Scaffold_13	4154801	4155385	584			>Scaffold_13:21824389	1		TATATATTTATTTTTTCTTCTATTATATTGTATTTTAATTTGTAATTATTTGTATTGTAAATAATATGTCCTATCAATAAAGTGTAAATAAATAAATAATAAATAAACTATAGAGAAGGAGCAAGGACTCTGATTCTTAAGTCTCCTCTGTAAATAAACATAAAAAAACTATAGAGCTGATGGAAAGAAGTTAATTTATTAGTATGCATTGGTTTAAAAAAAGGCTGACGTTCTTTCCCTGGGGTGCGGTTAACAGATGGGTACCAGCTTTAAAACTAAAAGACATAACACAAATCCTTGGCGCCTTGGCTTTAAAAAGAGCATCCAGCCGTAAAAGGTAGAAGTAGGAGAGCCACAACCAACCAATCTCATAAAATTATCCAAAGTAATTATTGTAAG…	24689
	Scaffold_1	56467577	56468165	588			CTGGCTGGTTATGATTACCAAAAATTAAGTGAGCACCAGGTTCTAACAAATATGGATAAATGGGAGAGCCCAATATTCCATCTATGTCTCCCGGAAGCATGAATTCACTATCAGCAAAATTTAAATCATGTAAATATACCAACTTTGAATAATCTACAGGCTGTACAGGTAATTTTTCTACAATGTCATTCACAACCAGTGCCTTAATATTAAAATTTACACGGGTATCAAAATTGGAATGAAATTTAAATTTAACCTCACCGTGTACAGG	2		>Scaffold_8:715167	18
	Scaffold_5	40803378	40803991	613			>Scaffold_12:22993982	1		GTGTACTTTAAAGTCAAAACTAACATTCAGAATTCACAAGAAAAAGATTCAGGAGAGAAAAAGTCAATAATAACGAAAAATAAAATTATATTTCAACAAAAATTCTAACATACTGAAAGTATCTACAAAAAGTAATTCGAAAACACCTATGCGGATGCTTAAAATGTAATTGAGAAATCGAATCAAATAAATACGTATATAAAGAATATAAACCTAAAATTAACGTCAGTCAATTTTTGAGTTGTTTTTTTTTTATAAAATACAATAGAAAAGAACCTCGCGTTTGATGGTCCACCGGTGGATTCACGTCTTCGTCTATCTCTTGTGGTGAGAAAGGCAACACTGTGCTTCTGGTGGAACGTCGAACGCGAATTCAGTTTCTTGTCTTTGGTTTTAAGT…	32759
	Scaffold_11	22889839	22890473	634			TGAGCTTTAGTTTATTTTACTGCTAATAATTAGAAATTTTCTCTTGAATCCAATTTTATACTTTTTCATTAACTGTAAATTTTAGCTATTTCTGAGTAATTTTTCATCAAACATGGCTGTTATTTTTTTATATAGCTTTTTAGCAATATGTCAAGCTACTAGTAACTGCCTGTTTGAGCAACTAGCTTGTCCAGGTAGGCCTGACTTTACAGAAAGTGGGGCTAGCTGGTGAAAAAGTTTACACTCTTCGCTTACTGCTGGTATAATGGGACTAA	2		GACAAGCGAGAAATAAATCGTTTTTTTAGCTGTAATCGGGAAGGCTTGAGCGTTTATTTTGTTGAGCTTATATTTTATTATGCGCATTTTTTTGCAAAGATTGACAACATGCTGTCTCATTTGAAACTCGTTATCGATTTGAATGCCCAGGTATTTAGCGTTATTTTTATAATCAATAGAATTACATGAGCAAGAGGTTGTGTATGTTTTGTGGTAGAGACAATTCCGGTTGTGGCAAATTATTTTACTGTAGTTAATATTTCTTTTGCTCATGTAACCCATAATAAGTGCTTCTGTTTTACTTTCATTCAAGAATATATGGTTGTTATAGAAATATTTTTGTAGATTAATAAAATCAGCCTGTGCATTTTTCACAGCTATTTCTGGATCTTTATGTAT…	25134
	Scaffold_10	17022709	17023354	645			>Scaffold_1:56013227	1		>Scaffold_4:907322	18
	Scaffold_6	19254598	19255252	654			TGGTAATCTACGGTTGAGTCTCGTTTGTGTTCGTTTTTTTACCTAATTTATAATGATTTTTAGTTTTTCTCAAACGAATAAAACATTTTTTTGTGAGAGATTTAATGTGATGACGGACGGTTTCTATTCTGAGTTCTTGGTGTAGTTGTTTGTTTCTTATAAACCATGGTGCGTTGACAGCAATTCTAAGAATTTTATTTTGAAAAACTTGTAGCTTAGACAGGTTGGTGGGTGAGGCTGTACTCCAGGCCGGGCATGCGTATGTGAAGAGAGGGC	2		TATTTTGGGCGATGCAGCAGCGATCACTGTGAAGGTTAAGCCGATAGCTACCAAGCAGAGGAACACTTGAGAATAAGAACAAGGTGCAGCCATATTGAAATCCTGGAACAAGATAAATAGAAAAGTCCTAATGAATCATTTTACGAAACTTTTTTTTTTGCTATCTAAAATTAAACTTATTTGTAAAAGTCAATTTCTATCTCGGGTATAATTATAATAATAATACACTTAGTGGAACCTAACCATCAGTGGGTGGAAATCCTACTCCCCATGTTAACCGGGTGTCTAAAAAAAATTCCCCTATCTCCCTCTCGAAAAAAAAGAACAAAAAAATGTACCTACTTGAAAGTGTAAAACTCCTGCACCTCGTTTAGAACTTGAGGAATGGCACGAACGACC…	32759
	Scaffold_5	33043951	33044614	663			>Scaffold_2:25234530	1		TTAACGTGTCATATACGATGGGGTTGTTACCCTCCATTTTCATGAAACTACCAAACAACCCACTTTAATCTCACCCATCCTGGGTTGGGCCAGAATGCCAGCAACGTCCAAGATGGTGAGAACGTAGAATGGTGACCGTTCTGGGTTCGAGTACATCTGCATTGATGCCGACACTGCCTTTGATGAGATTTCTTTCCTTCGTAGTAATTTTAAAAAAATGAGTGTCTCATGGCCCCTTTTTTGTATGCAGCAGCTACTGTAGGCGCCACTGTGTTCTGTGTTGTAGCTTGCCCATCCCGTAGTAAGCCTCGGTGGCGTGACGGTTGAGACTACTGTCCATAGTCCAGAGATCCCGAGTTCGATCCCCGATTGGGGCAGACTTTCCGAGAAAAAAAATCT…	25741
	Scaffold_12	11299822	11300503	681			GGAAATAGGAGACAGGAGCGGCAACTCAGACATTCACAAGAATTATACATTTTCCCCCCACCAAAATGGCCATTTTTCAACTGGGAGAAGGGACCTATCAACCAAGTAGTGGACTGTATCGGAAAAAAAGTGGACTGTATCGGAAAAAATTAATGTTGGACCAGGACAAGACTCAACATAATACATCAAATATACATGAAAAATGAAAACAACAAATTGACTAGAATGGATAACTAACCTAAGTTAAGGTGGGCAAAAGGAGAAGCCTTCGAACGGG	2		>Scaffold_10:3218551	20
	Scaffold_10	9319170	9319857	687			>Scaffold_3:8180444	1		GTTTTCTATCTGGCCAACATCTTAAAATCAACATTACAAGTCAATGCTACTGTGTTGAAGATTCATGAAAATAATATCATTGAACATGGTAAAATGATAACAATATTTGTCTTATAATTATATAGTGCCTAATCAGGACCATAAAGTCCCATTATTCCGGCAGTAATCCCAGAAAAAAAAAAAAAAAAAAAAAAAAAAATATGGTGAAGTCCAATCTAATTACCTACCCTAACATGTCATCAAAATAGTACCCATCAAAGAGAGAGAGAGAGAGTGATAGAAAAAAATACTGATGCCAAATTGGATCATAAAGGCAAACTCTAATTAAAGTTGTAGGTTTCCTGAACCACTATGATTCCCTAAACAGCACCATTAGCGGTTGATATGAATTTATGATAG…	32759
	Scaffold_9	16158162	16158853	691			GTCTTCATGGATGGCTTTTCCAAGCCTGTAAAGCTCTCTGTTCCATGCCTTTAAGTTCAATATCTCTCTGTTGTAAGCTCCTAGCTGGTAAATAGCGACAGCGAACTACATTACCTAACTAATGACCGCTTTCTGTTCCATGCCTTTAAGGTCAATATCTCTCTGTTCCAAGCTCCTAGCTGGTAAATAGCGACAGCGAACCATATTGCCTAGTGACCATTCCCTCACATGACTATTTCTCTCTTCTTCTTTTTACTCAACGTCTCTATAACTTTAAG	2		TTTATGTTGGCACTGGGTGGGATTCGAACCAACGGATCCCTACACTACCTGGATTACCAGACTTGCGCGTTTGCCGCTTGACTATGTAGGTATCTGTGCCTGTATCACAGACACGGAATTATTTTGCTATTATTTTTCGTTGCAATTTTATAATTATAAGTGACAAATGTCCGAATTAATTTTCTTGCATTTAATACAGGGTGTTTCAAAAAAAGAGAAAAAAGATGGAATTTTTAACTCGAATTAGCAAAGTGATCGATAAATCTATAAATTCGATTTATCGCTCGAGAGAAATTAACTATCGATAGTCGATTACTCGATTGTATCATACTTTCGAGAGAGAAAGGTGGAACCTATCTTTTCTTTGTAGTTCTTAAATTATATTTTTAAGAAGAAAAA…	26160
	Scaffold_6	7395511	7396223	712			>Scaffold_11:12560063	1		>Scaffold_10:24757167	21
	Scaffold_2	41828867	41829593	726			CTCACATCTAATGTGATGGAGGAACATCACATTAGATACATACATACAATATGAAGGGGAAGGCCTGATTTATAAGTTTAAATTTGTACTAACCATAGACTACCTATAAATACATTGTACAAATTTGATAACATTTTAGGTGGAAATGAGGCTAATAAATAACAAATAGAAGTTAAAAAAAAACTAAACTTTTCCTCGAAGATTGATAAAAAATTCGTCCATAAGATACTATTTTTAAAGCCCAATAAGGGAGTGGGGATGACATGTTGAAACACCAGCT	2		AGAAGATATTAAAAACAACTGATTCTAGTCTACCTGCCAGTTTAATTCTAGTCACAGAGTTTACCAATTTGTAAAGGTTCATCAATTTACTGTAGCTGTGAGGTAAGTGTGATATTTCTACTAATTTATTCTGCAGGTCTGTTTTGTTTGTGAGAGAGCTTTGCAGGCTTGACCATGAGACCAATTTATTGGTTTTTTGACAATGTAGTATGTTTTTCTTGACCTGATGATGATAGTATTTACATTTTTCATATTTAAAGTAAACTGAGAAGTCAGTGTCAATGGCACATTGCATACACTAGTTCTCATTCTGTCATTGAAGTTAAGTAACATCCAGTGATGCTAAGACTTGGATAAATGACAGTTCAAAACCTTGTGATGCTGCTGGCTATTCCCAGT…	32759
	Scaffold_12	9753797	9754546	749			>Scaffold_6:13271374	1		TCTGTCTCCACTACGTTTTGCACAAGCTCCTTCTCCTCCACAACTCCAACACTGGGAGGAGACATAGGGGGAGGGTCGGGTTTTGGTTTGTTCATATAATTCTTACACTCGCTCTCGTTCTCTTCTGTGATGGGCTCTGAAATGCTCACCTCCTGATTTGAACTCTGACACGTTGCCTGTTCATTCTGGTCCATGGGTGTGCTCTGTTCGTCATGAGAGCACAAGTTTTCCGTACTCGTCGACATTTTCTTTTTCTTCTTGTGGCGGCGTGTGGTCTTCATCTTGTCTTGGCTACCTGTCTCCTTGTTGGCAGACTCTTGTCGCACATTGTCTTTGCGATAACTGGCGGAGCTCCCGCCGCTGGAAGCACTGTTGCTGGACTTGGAATTGAAGCTGCCA…	26636
	Scaffold_7	3017509	3018275	766			ACAGGGTGTCTACTAAATGGTCAAAGTAAAATTCCCTGACTTTTCCAGGTTTTCCAGACCATTTTTCCAGTTTCTCCAGTCTACTTTTTTAAGGAGACATTATATGTATATTATATAAGACTGTAGAGGAACTGCTAGCATCAGCAGACCTCTAATGTTTTAAAATGTTGTCAAAACAAATAAATAAATTTTGACATAATATAAGACCTCAATCTGCCTATATTTTTTTTGCAAGCCCACCGCCACACCCAACCAAACATTTTTTTCTAAATCAATTAAAT	2		>Scaffold_4:33142921	20
	Scaffold_10	16490180	16490961	781			>Scaffold_1:22619959	1		TGAGTTTCCTGCGAATGGAGGGTAAAACCCCCGTCGTGATATGACCATGGCAGTTGAAAGCGACGTTAAACCCCACAAAAAAAAAGTGTGAGACAAAAGAAGCTTTTTTCTCTCTTTTAAATCAAATTTATTATGTACAATTCAATAAGCTCAATAAATAGGTATGTATCAGCTAAAAGAATAAATCATGTTGAAATTGAAAGTATAAATTTAATAAAATAAATAAAATATGAATCAAACAAAATGTTAACACTTCAGGGATATTAAAAACAAAAAAAGCGGCGCGAACGAGGTCGTTTAACCTTGTCGACAGACACCTGTCTGTCGACAAGGTTAAAGCGCTTAAAAGGAGGAAAAAACAAACAAAAAAGTCTTATCTGGGTAGAATCAATGGGTATC…	32759
	Scaffold_7	7345228	7346028	800			CAGCGACTAACTAGGTTACGCGGTGTTCTCGTGACGCATCCTCTTTCTTACATCAAGTCAAAATACCAAATTTCAAGTCTAAACTATACCGTTATTGAGACATCTTGTTCATGGCTATTTTTGCCTACATCTTGGTTTTATTCGCCCTTTCATTCGCAGGAAACTTATAAATCTGCTACTCACATTGACCTCACCCAGTCTGGGTTGGGGCGGAATGACAGCATCACGAAGTCTTCACCTCGCTGGACGTTGCTTAACTTCGGTGATCCTACGAGAACCGG	2		ATTGGTAACCATTCAGCTCAATCTGACTTGCGGTTCTCAAGTTATAGCGTTTTAAACATACATCACGCACAAACGAATCATTTTATAGTATTACATTGCTATTCTCTTTTTTTTAATACGAGGGCAACAGTTTAGCGTCCACTGCTGAAAATGATTTATGTAGGGGCCCGATCACTAAGTACCTTTCACGCAGACATGTAGCACGTGTAATTAATATTGGTTATGTCGGCTCCTGTACCGAGAGGTTGTTAATGTCCAGCTAATGGCCCACTGACCAATAATAAGGTATTAGATATCCCTCACTTATCACTGGGACAACCTTGGGTCATATACTTTTTGTTTTTCTTACACAACATATACATGTTAATTATAATGATAATTATTGTTATTATAACATCT…	28918
	Scaffold_12	12755883	12756686	803			>Scaffold_1:17780436	1		>Scaffold_10:14469917	21
	Scaffold_9	22290873	22291681	808			GGCTGTATACTACTTGGGTACAGACCTTATTTTATCCTTCTACTTGGGTACAAGAAAAAACACAAGATATCCGACTTGGGTAACGGGTCGTTTTTTTATTCATTACATAAAGAGTACATAAAAAATTATATAAAAATTATACCTACCTACAAATTTCTCACTGTCTTGGTCTACAAATATTCCTTTTCCACTGAAGCTTTGTTGTGTTTTCGTTAAATGTTGTGTTTCGTTAGCCGGCTAGGATAGCTTGGGTGAGGGGCTTAGGTTAGGTTGAAATTAGC	2		AGACGAGACGCAAGGGGACGCGATGATCCCGGTGTTCAAGAGGGGCGTCCTGTACAAGGGCATCTACTGCCCCTCCCTCACCAACAGCTTCCGGGAGTCCTCCCTGGAGCACTCCTACCAGCGCTACTCACACCGGCAGCGGCAGAAGTCGCTCATCATAGTCAACCTGGTGGATATGGCGCTCAAAGCAGTGCTTACCGGTGAGATGTATATGTATAGCTCAACTGTTAATACAGCAGTTAACCCATTGCCTACCATGGGTAGCACATTTGCAAGACATTGGTATTGCCTGGGGTACCGGGGTTGCATATATGCTAGACACCTTTGAACCTTCTTGGGTACCATGTATAGCATATATGCAAGACAATTTGTCTAGCACATAATTATGCTATACACGGT…	32759
	Scaffold_5	36533071	36533891	820			>Scaffold_11:6216756	1		TGATCTCCAGGTCCAGACTCTGGTCAGAAGACAGCGGGGCCCAACAGGACTCCAGGAACAGCGTGTCCAGCCAAGGTATGTATGAACTTATTTGCGGTGAAGCACAAGGCCTCTTCACAATTATTATTATTATTATTAAACTTGTTGGATCAAGTTTTATTTACAAATAACATATAATATATACATACATAGAAATTAAAATTAACAAAACAAAACTTGATCAAGGGCGGTGCTAATGCCAACGGCATTCTCTTCCATTTTTGTGGGTAGCGCAGCATCACTAAGAGCATCCTTTACTTTTCGAATTATTCCATTACATTAATTTTTTTTTTTACTCTGGTATTGCCGCGGGCGATACTAAAACCCGGACCCGACAGAAAAGATTGACTCGATTGAAAA…	29916
	Scaffold_3	51006751	51007576	825			CCTCCATTCGCAGGAAACTCACAAGCCTGATACCCCCATTAACCTCACCCAGTCTAGGTTGGGTCGGAATGACAGCATCACATACTGAAAACTAGATGATCTTGATATATTATGTATGGTACCGTATTCGCTTTGGTTTGTAATTAACATTAAACTGTCAAACACATATTTAAAATACGATGAATAAAATACTTATATCCTTAATATTTTAATGATACAATGGAATTATCGTTGAAACTTTTGATGCCATTTACTTTATATTGTCATTTTGTTAAAAAAAA	2		>Scaffold_1:33174229	20
	Scaffold_5	29561264	29562091	827			>Scaffold_12:597648	1		GAGAGGAAACTGTTCGTGGGGATGCTGTCTAAGAAGTACTCTGAGAACGATGTGCGGCAAATGTTCCAAGTGTTCGGCACCATAGAGGAGTGTACGGTCCTGCGGGACAATAGTTCTATTAGTAAAGGTAAGTCCTCGGCGTCCGCTTTCCCTGTGGCTTTCTATGTTGTTTGGCTTTCGTTGGGTCAGCCTACTTGGTCGAGTCGCCGCTTGTGTTACTCCTATTTTGAATTCGAGTCAATTCATATTGAAGCGATCAGATGTATTTCACCATTTTTCGTTATTTTTCCGCTAGTTCAATATTGATAAAAAAAAACAGCATTGTACGGATAACAATTTATGAATTAGTTACATTCATAATATTTATGTTACATACATGACTATTTTCATTTGAATGGA…	32759
	Scaffold_12	13307328	13308158	830			AGTGCGGAGAGCAATGAGTGGCTGTAAAAATTTCGGGGACATAGCCGTAGCACCATGATTCATTGCCAGTTATAACCTTGAGAAAAAAATCTGGGTCTTCATCCAACTGATTTTGCAGCTCCAGACAGGCCTGAAGTCGACGCTCCTTATTTTGATCGTCGGAGAGAAGGCGAGGAACAAATTTGGCTGCAATCCTCTTCATGATCAAATCTTCAGTTAGAATCCTCTGAATTGAACTCCATGACAATCCAAACATCTCACAAAGTTGATCGATGGTTCAG	2		AAATATTTGCATCTGTATACGGGACACCCTGTATATAAAACAGAAATAAGGACTACCTATGTTTGTTTGTTTGTCCGGAGTTGTTTAGCCAAAACGGTAAGAGATAGCGAAAAATGTCTCAGAATTGACCCCCCCAAAACCATTATCGCTTTGTCCAGAAAAATTATAAAAAGTTAAAAAAAGGCATTGCTGTCCAGCAGTACGGCCATGCCTTAGTAAATTTGAAATTTAGTCCCGTTGCAAAGCACGGACAAACGGCTAGTGCAAGATAAAACAGAGCCTCACTCAGTAAGGTTCTTTTTTTAATTTTTTTGGGGAAATAAATTATTATTATTAATCTATTTGTAATGGGCTTTCTGGCTGGTTGTTCGGGTGTTAATGTTGACCTGGCTTTACCAA…	31402
	Scaffold_3	1371361	1372194	833			>Scaffold_1:4318599	1		>Scaffold_11:2463140	20
	Scaffold_4	31726653	31727501	848			TTTATGGCCACTTTAAAGACCAAAAACTTTATAATTTGTGACAGTGTAGAATTAGATAATATATGGCAACAAGCTGTTGAGAGTCTGCTCTCAGAAATGCTTGATTTCGAAGGCAAAGGAAGTGGTTGGACTATGGATTTTATTGGTGGTATATACCTTTGTTTTTTAAAATATCAACCCATATTATGTGGTACATTTATTACTACACCAAAATTTCTTTTAAAATCAGAAGCCGTTTACAATGTTAAAATTAATGATAATTTTTGCTTTAAATATGCATTA	2		CCGTCCTATAGATCGGATCAATCCCCATCGTCCGTCGATTCGGTAAAACATCGATTCGTAACTCGTGACACGTTTTTTCCGCGATCTGTTTTATGACAAGACAAAACTTTACGGGGTACCTAACTTAACATATTTTTTACACAAAACCCTACTGAGGAACTAAATTTTATGCATGTGCTTCCCTTTTTTCCTTTTTTTTTATGATTCAATATTTAAATAACTCCGATTGATAACTTGAGTGAATTTTGGTGATCTGTTTATTATTATTATTCAACACTTTATTAGATAAAAAAATGGACATTATATACATACAAATAATTATTTTAACAATGAAAAAAATGGAAACAATATACAGGGTGATTCAGAAAAGTACCGTCAAACGTTAACCACATATTCTAT…	32759
	Scaffold_10	16728972	16729821	849			>Scaffold_7:18610096	1		CCTCACATTGTCGAACGTCAGCACTTCCCCCGGACGCAGTTTCAACTCCACCATGTACGTCCGATCGTGGAGCAGCCGGGTGAACTCCGCCATCGCGTCATACCACGGCTGAACTTCGTCCAGAGGCACGTTGAACACGGAGTCTCGCTGCGGTTGACTGTAGTTGACGCGGGCGATTCTTCCCGTCGCGTCCAGACAGATGACGGGTGACCGATGGATGTTGGCGAACTTGTACCGATCGTCCTCGCCGTAGTCCGACCAATCGACGACCGTTCGCGCGAGGACTTTGAACACGTCGCGATCCTTGGACGCCAGGTGGTGACACACGGCGAGCCCGTCCGACAGTTGGTTGGTGCCCTGGGCGGGGGCGGGGCTCTGGACGATGCAGTGCAGCAGGTT…	31478
	Scaffold_6	6469291	6470164	873			CTATTCAGGAAACGAATTGGTTTCTATCAAAAAAGTAATTTCAAGGCACAACTGTCTGCAGAGATACAAGGACTAAAGTGTCCCTTATTCTTGCCAAGAGTTCAAAGATTTAATTATTTGATAAATTACCTAACAGTTTAGTTTAGTCGACGAAGGAAGAAACTAGAAAGAAATACACATATTTGTAACTGGTAATTTGCTTGAAGAAAACCACAATAAATTAAGTATTAAGAAGCTTTATCTGTGAAATATTTTACTTTTAGTTATTTTAAATTAATTAGTA	2		>Scaffold_7:24779313	20
	Scaffold_3	50798199	50799072	873			>Scaffold_11:3911788	1		GTTTTGTTTATATTCCTTATCAGCTGCCCTCAAAAAGTGATCTTGGAAAAGTTCAAACTTCAAAAGCTACTTTTCCTCTAGAAAAGTGTTTGTTGTGTGATAAGTGAAAATGGTGCTCACTCAGGGTTACTCTCTTCCAACCTACGACGACTTGGAGCAAGAGGAAGTTCCGTTAAGTACAGCTGCTCTAAAAGCGGGCGCCTTCCATTTTGCCAAGAGTTGTGAACTGGAAAACAATGAGTTTGTCCTGTGTAGAAGAGAGTTGAACGACCCTAGAAAGTGCCTGGCAGAGGGTAAAGTGGTGACCAATTGTGCCCTGAACTTCTTCAAGAAGGTAAAGGAAAGTTGCTATGATGAATTTCAAGTGTATGCAAACTGTGTTGACAAAAGCAGCAGTTG…	32759
	Scaffold_1	1002831	1003718	887			CCGTGATGGAGGAAAAGTTGCGGACCACTGATCTACGTACACTGAACGGCCATTTCTTATGATGAGTCTAATACCTAGTTTTATTTAATAATCGTATCTCCATTAGTTGATAAAACTAAACCTGAAATGAAAAGGCATATATATTTTTAAGAAAATATAACGATGTATTTTCTGTCAGAATACTTTGTAATACAAAGAAATACAACATTCCTACTCAGTTTTTATCCTCTTTCTTTTCAAACCCAAGTAAAAGAACCCAGAATATGTCTGTTAAGTTCTGTCC	2		AACTACCTCCTGATTCCACTATTATTGTACTGCTGGCTTTTGTGTTCATATTATATTATTAGCAGTCACACCGACCTCATTAGCTTGATCGATAAGGCGGCGGACTTGTAACCTCTAGGTCGGCGGTTCAAGTCCCGGTTTCAGCTTAGATTTAGTAAAGCGAGTTTGAGCAGTTGTCATATCACGAAAGTGATTAACACAAATATGATAACTTTTTATTAGCAGTCGCAGTGGTGGTGTTTTGCACTCCATTCTCCTCTATGGGAAACCAATGGGTTTTTTTTGGAAGAAAGTCAAAAATCAGGGTTGGGTGTTCTTTTATTATCAAGGGTAATTTTTTTTTTCATAATTGGCCATTGGCTTTTATAACTGACGTATAGCACAGGATGAAAATAACAC…	32652
	Scaffold_2	49931963	49932872	909			>Scaffold_2:26247076	1		>Scaffold_10:6340622	20
	Scaffold_3	52700050	52700981	931			CTACTCTAGGACAACTGCCGAGCTTTCCGCACTCTAGTTGGATCAGTGGACACATAACTCACGTGAGCTTTGGAATGTAATTCTTATTGTTTGTTTATGTTAAATTTCTGGTACGATTGGCTATGTTATGCTGACTGAATTTCGGGAATTCAACAATAGAATTTACTCATGTGAGTTTTGGAGTTATATTTTCATTGGATGATTTTTGACAACCATTAATTCGATTGGTTCACAAGTAATGCTGATCCATCCACTGAATCCACCGAATTTGGTTCTTTCCATC	2		TATAAAGTTACCCTACTACCTACCTATATGTAACATTTTTTTAATAAATCAAAACTACTTAAAAAATCTACAGTCTGTGGAAACATATTAATACTCAATACCTACTTAAATACTCAAGATGTCAACCTTACTAGAGTTCAGTTCTTTTGATAATTCTACTTCTAACTTCAATTATTTCTTCAACAACATCATGACAAGTGAACTGAACCCACTAAATCAAGTGGAGTATGAACCCTGGATATTTGCAGTGATTGGATCCCTGCTGATAGGACTGAGTGGTGTATTTCCCATTCTTATCATCCCCATTGATGATTTGGAACACATGAATGCTAAGAAAGGTAAACAAATCAGTCACTTCTCTTATCTCAATTATTCAAACACAATAAGAACAAACCTTAT…	32759
	Scaffold_10	28231771	28232705	934			>Scaffold_4:34686566	1		TCACCGTGGCAGAGTGAAATAGCGCTTTTGCACGCATAGTGACCTGGGTTCGATTCCCAGCGGGGCAGGATTTTTTCTGCTTGGGTGTTCGGGGTCCACTCATATTTACAAATAACATTGGTATTGGTAAAGGTAGGGCTATCGGCTACGAAAGCTCTTTGTCACTGCGACCTTAGATAGATCTTTTGTGACATACAAATAACATAGAATATATACATTGATAATAATAATAATAATAATAATAATAACTCTTTATTGACAAGAATAATATTGACAAAGGGCGTGATTATTGCCTGAGGCAATCTCTGCCATCAAACCCATAATTATTGATATTGACATTAAGAAAACAAAACTTGATCCAGGGCGGTGCTAATGCCAACGGCATTCTTTTCTATTAAT…	32759
	Scaffold_11	6264995	6265938	943			CCAAGCCAATTTTTTCAAATTTTACGTAGGACCGGGCGATAAAGTCGCTGTTGCATTCTGGGGACCAAAATTTTTTTTGTTGCATATTTGGCATCGTATTTGTACAACAATCGATCCTATACTAACAACCTAATACTAACAACCTAACAACCTACCTCAAAAAGGCCACATATGGATGTCCGGTCCCTCGTTAAAATTTTGATAACGGCCACATGTGTGTTTTCGGTCCCAGAGAAAAACACAAAAACATCCACATATGGCCGTTCGGTAACGAACGTGTTTT	2		ACATTGAAAATAGATCACTTGATTTTACAAAAGTTTCCCTCTTCGAAAAATACAAACTTTAATATGATATGACCTCTTATATGTGTTTCTAATTTTATATCTTAATACATTCTTATTAGTTGGATTATTGTAGCATCACCTAACTGACCTAACACTAAAAAAACATCTTAATATATAAATGTCATAGTCACTGACTGACTGATCATCACTGTTTCTCCGAACTGGTAAGTCCTAGGAAGCTGAAATTTGGTAGGTAGCTTTGTCTTATAGTCTAGATGTGCAGTAAGACGGGATTTTTCGAAATTCCCACTATAACACCTGCCATTGGCGAAAAATTACTTTTTGCTTTCACGGCCATGCCTCGGCCCGCAAAGCGGGCGACAGCCCGCTAGTTAAATA…	466
	Scaffold_11	21318959	21319911	952			>Scaffold_1:26511801	1		>Scaffold_5:40433480	20
	Scaffold_3	4137286	4138265	979			TTTTTTTTAACTCCCGCGATTTGGGGCTAATTTCTACATGGCAGCTAATTATATGGGATATATTATATTATGTATACACGTTATGACTGCTCCCTTTCCAAATCCCCAGAGAGTCAAACAACTAGGTTTTTTTTACTACACTCTTAGCAATAAATCCATCCCTAATTTTACCTGTTATAGATTTTTTTGGGAAACTATTTCTTTTCAGGAACCTGAAAAGTAGTGTTAGTTTCTCTGGTTCGTCATCCAGGACTCTTAAGAGTTGTGCATGAAAGAGACCTGGG	2		CTCCTTTGTCTTCCGTCAAGCGTTCTGCGTCGCGTGCTTCCACAGATCTCCTCGGCCGACGAACGAGAAAAAAGGTAAGACGATCTTCCAGCACTTTTTTCGACCACAAAGAAAAAAAAGTTAATACATCGGAATCTGGGTATGAGAGAAGTGGATAAAAGAAAACCTTGGATATAAGAGAACATTTTTCAGGTCGAATTCACCTCTCTAACGGAAATTAACCTCTTTGTAAGAGAAATCTGGATATAAAAAAAAACATTGCGGTCCCTTGAGTTCTCTTATATCCAGGTTCTGCTGTACTTCTAACTTTAGCAAGTTTAAATCAATCAATCATGTGAAAATAAGAAGCTTCTTCTTCATGTTTCTCTGTTAACGAAAGTTGGGAACTATCAAAGCCGA…	32759
	Scaffold_3	44930180	44931182	1002			>Scaffold_8:7985550	1		GGGTGAGGTTATTGTTAGTAGCTGGTTTGTGAGTTTCCAAAGAATGGAGGATACAACTCCCGATTGACCTAGATGTTAAAGTGACTTTAAGGAAAATAAGAAGAAATATTGTGATAAATGTTGAACACAGTTAGAGGAAATTTGATATTAATAAGGACACACAATATGGAATTTAAAATTATAATAATTTAGGTCTTAGGATTAATGCACCATATTATAATCTATTTCTTTGTAATCGTGCATAATTGACACAAGTCACTCACGTAACAGATAAAATTATGAAAAGGAATAAAAATTATTTCATATTTACGTAATTTTTGAATAATAAAATGCAAATATATTTGCATAATAAAATAAGACAAAAGGATAATAATTTATCTGCCCATTATGCGAGGAACT…	32759
	Scaffold_13	2338352	2339357	1005			TTCTTGTAGGATTGCTGATTTTTAACAACTTTTCCAGTACCTATCTACCTACCTGGTAGATGATGTTGTTGTTGTAGCGAAGACCTGGTAGATATGTACTGGATATCTAACAACTCAAATATTCGAACCCCCCTCGTGATGATAGCCATTCCCGACCCAACCCAGGCTGGTTGAAGTATATTACGACAGTTGGTTGAATCCGATGTTGAGACATCTCGTCTCGTAAAATAAGAAATTTTTCTCGTCTCATTTTACTTTCGAGAAATTTCTAATATTAGAAATCGG	2		ACTTGAATGTCTAACTAAAGTTGTTGTTCTTTTGTTCTTTACCAAATATTAGTCTTGAAAAGGAGTAATTACCAAAATCACTCTGTCTGTTCAATGAAATGTATACACTGGCATTTTTAATAAAAAATAGTAAGCATATTGGCTTGGACCACTAAAAACAACGTCAGGCAAAATATTGTTCTAATTGTTTAGCTATTCAAAACAAATAAATAAATAAATCCGGGTTTGATGTTCCAATGTCGAACAATTGATTAAACCAAAATTATATTTCACAAAAAAATAATACATCATGGTAAAAACTTTCTTTGGGTAATATCTAATGCACTGCGAATGGAGGATAACATCCCCGTCGCGATATGACCATGCAGTTGAAAGCGACGTTAAACACAATTTAAAAAA…	831
	Scaffold_7	38125064	38126074	1010			>Scaffold_1:4209784	1		>Scaffold_4:50523484	20
	Scaffold_9	9886296	9887311	1015			GCCCGATAATCCACTCGAATTATGGGGATTCTGATAACGAAAACCAACCTCCGATAATTTATGTCATGCGCAGAGACGCAAACTCGAGACATCATCGTTATGGGAATAGATTATCGTATCCCGATAACTTGCGAAATCTCTCTATTATTTATTCAATATTTTAAATCAGTTTATTTTCCAAATACTTACAAATCATATCAAATCGAATGAAATAATGTATTGTATGAATTAAAAACATGACAGTTTTTTAAAGCGTTGAGGTCATTTTAGAATTGTGAAATTTCAG	2		TGGGGTGAGACTTTATGCTCACCCTGTATATATTACAGGGTGAGCATAAAGTTCCGCCCCACCCCTTGTACGAGTATCTCGAGAACAACTCCAGATATGGAAAAGCTATACGAGTTGCCTCTTTTTTTTGCGGTATTGACTGTGAAGTGTGAGTCCAAAAAATTAACTGCAGCCGGCTGTTTAGTTTAGGTATACCTACCAGCTCATCTGAAGCATCTTAAATAGAATGACCTATCAAAAATGGATTCATTTTAAACGTAATTTAGAGAGAGAGAATAACGATCAATAAAATTTATTGAATTCATAGCAATTTTTTTTAGACCTCTACTTCAATTTTACCTATAGCCCAGGTACAAAACTATAACCTTAGTCTATACCTAGTTTTCTATGATATGATTT…	32759
	Scaffold_4	23967336	23968373	1037			>Scaffold_3:5527823	1		ATCTAATCTATAGATGACTAACATAACTTTCATCAATGAAAATCGAGGTAAAACTATATCTGTACAGTCAGATGAAGGAGAACGAGGACAATGTTCAGACAAGGATTATCGATCTTAAAGAGTACGCGAACTTTCGGCGCAGTCGTATAAGTTATAGAAGATAGGTTATCAGGTCAGATATTGACGTAACGACATTGTAGATAGTAGATAGAAGAGTGATATATGCTCCATTCACAGTAATTGTGCGATTGCGAGTGATTGAGATAGAGGCTGTTTACAATACAGTTATTAGAGCAGAGAGTGACAACTCTTACTAGACAAAGACGTTACAATAAATATAATACTTGAACGGTTGCGAAGTTACTACACAGTCTGGAGTACACGATATACATACATATT…	32759
	Scaffold_5	33039420	33040485	1065			GGTAGTCACTGTGGCAGAGCGAGTTAGCGCGCTAGGCATTGCACACATGGTGACCTGGGTTCGATTCCCAGCAGGGGAGGATTTTTTCTGCTCTGTACTTGGATGTTCGGGGTCCACTCATACCTCGTGAGGAAAAATGAGTAGTTACTTGTATGAGTAACGACCAGTGGCGGCATTACCAGAGTAAAAAGAAATTAATGTAATAGAATAATTCGAAATGTAAAGGAGGCTCTTAGTAATGCTGCGCTACCCACAAAAATTGTGAAGAGGCTTTGTGCTTCACCAC	2		GGTGTCACAGAAGTAGAAAAACAAGGTGTCACTCATGGAGGTTTTTTCATTTACTAATATCTACTTTGACAAACTAACTCTATACTCAATTAAATATTAACATTACTGGACTTGTTGTCTACAAAAGACTTCTATTAACAGACCTTTTTTTCACTTGCAGGTGTGGGGTCACAGTTCTGATGATCTGCTAGAATTCCACAAGGCACACAACTATCAAGACCGTATATCATACATAGTTGAAAATGACCTCATCATAGATGCTGTCACTCAGAAACTAAAATCTCTCAATGTTGATGTTATTTATGAGAACAAAGTTTCAAAATATGATCTGCCTACACAACCTTTTGATAATGTGAATATAAAATTCGAATCTGGAGAGAGTGTGGAATGTAAATTGCT…	8663
	Scaffold_3	28330267	28331351	1084			>Scaffold_2:9493086	1		>Scaffold_9:18618372	20
	Scaffold_3	2700972	2702062	1090			CTAGGATTACGTCCTTATCGCTATGGTACATAGAACTGCAAATATACAGATATCAAGGTCGAGTTTTAATACTTATAACTTATTTACCATCCCACTTTTTATTTTTATCAACACCACTCTTCATCATTTTTTTGTGTCAGCAAAATATTACTCATTCAGTAAATAAAATTGATTGATTTTCTTTTTTACTTTGGGATTTTGTGATAAACAAAAAAATAAGTAATAATATCGCCTAGTTTACACTGCCCAATTAGGACTAATAAGTTCTATTATTAGTCCTAAATGGT	2		ACCTGAACTTCACCACCAAAGGTAAAGTTAAAGTTATCATATTTGTGTTTATCTATTTCGTGTTATCACAACCACTCAAAGTCGCTTTACTAAATCTACACTGAAACCGAGACTTGAACCACCGACCTCCAGGTTACTCGTCCACTGCCTTATCGATCAAGCTACTGAGGTCGGTAGCTTATGAATATACCTACAATGTAAAGGGCTCAAGGCACAACACTGACAATGCTGTAAGAATATGAGGGCTTACCGTGTTGCGGGGTTCGCAGTCCTGAATGAGCACCTTTTGCTAAGGAGATTTGAACTCATTTTAAAGTTTTCAAGGAATGAATTTTAGTCAATCTTGTTTTTGGCCCATCCTGTATTTCTGACTGCGGAGTTGTTCCGGGGCTTTTGTTT…	32759
	Scaffold_11	28421673	28422768	1095			>Scaffold_4:5919138	1		TAAAACAACATCGGTTGGCAACAAAATCTTTAGACCAAACGTATCCTAAATGTATCCTGAATTCCAAATTTTCTGCTAAAATATCGCAGTTTTAATTCCAATTCCGTGCGTCTTTTTCCTCCGTATAATATCTTCCTTCTCTTGAAGACGTCCCCATTAACAATTTCCTCTTGTTAGCGTGTAAGTTTACATATTTCTTTCCAACTTTAGGCAAATAATTTGCGTTCCTTATTTTTTCTTTGCTAATCCTTTTCGCACTCTCTCCCAGTCTTCCTCTATCTCCTTCTTTACCTTTTCCTTCTTTTTCTTCTTTAACTTCTTCCTTATTTTTCTTCTTTAACTTCTTTCTTATTTATATTCTTTAACTTCTTCCTTATTTTTCTTCTTTAACTTCTTCCT…	32759
	Scaffold_1	17791844	17792963	1119			CCTTATGACAAGCACTGTCGAAAAAGATATAACTCGACATACTCTGTTGATATTAGTTTCTGGTCGGTTTCGTCAGCCAGCCAGACGAACAGTCCGAAAATGTTTAACGAAAAAACAAATCAAGTTTTAACTTGTTCGAAAGTTCTTACCGTAAGGAGTTCTTATCAACAAATTTCATTTTTCTGGAATTTACGGTCAACGAGTTATAGGTCAAAATATATGGATATTACGCAGGACGTCCGACCCTGTATCTCAAGAACGGTAAGTCGTATCTCACTGAAATTTAT	2		TATTATAGTATTGACCGACCTCAGTAGCTTGATCGATAAGAAGGTGGACTTGTAACCTGGAGGTCGGTGGTTCAAGTCCCGGTTTCAGCGTAGATTTAGTAAAGCCAGTTTGAGTAGTTGTGATATCACGAAAGTGATTAACACAAATATGATAACTTTTTTTTTACTGGGTATTGTATGAGAATCCTGGGTATAAGAGAACAATTTTTAAAAGTCACATTTACATCTCTATAACAGAAAATGTCTATATAGGAAAAGGGAAAGAGAAACATGAAAATAATTAGAAAAAAAATTATGGTTCATTGACTTCTCTTATATCCAGGTGCGACTGTGTAAGTTTATCGCATAGTAAACAATATTTAAAAGATGCCCCTTTCCTTCATGATATGTAAGAAATAT…	10555
	Scaffold_5	2444156	2445292	1136			>Scaffold_4:33303177	1		>Scaffold_4:33218271	20
	Scaffold_4	16614538	16615693	1155			GCGAGGTACGAGAAACTTACTAGTAAACCGATCACTACTCCAAAAAACATTTATCTGTTCTATCTCCTTGGAAATCCCAAGATTTTGTTGCCACAAAAAATTTCCATCGTCGATGGTGCGTTGAATGCCCCAGTTTTCTTCTGATCACTGAAGTAAAGCAACGACTAGTGACATCAAGACTTGGTGGGTGACCAATGAAATTTGAAACCTATCGTGAGGTTGGTGTGAGTAGCTTATCTGGAAGAATGGCTACGATGTTAAAGAGATGTCAAGTAAAATAAAAATAA	2		CAAATAATTGAGAAAAATCTATAAAATGAACATAATTTTGCTTAATACTGAGCATGGCTTCAGAAGTGTTTCTTTGACCTGAGGTCCAAAATAGCGAAAACTGCTTTAGCAATGCTGCGTACTATTACAGTATGGAAATGTTCCTTGTTTCAATACCAATGGCGTGTATCTCAAGGTATATGCAGTAGGTCTAGAAAAACTGGCTTATGGTCAAAAATTAATTACTTTCTTATTAAATAGAACTAATGGTAAATATATTAAAGGTACTTCATTAAAGCTATGTGTGTTGTATGAAAAATCCACAAAGGTCTTTTACATCGGATGAGACTTATCCCTTAACACTATATTCTTTACAACAGGCTCTTCCATAGAAGAAGGTGTACTTTGAGTAGTACATAC…	32759
	Scaffold_8	33000053	33001233	1180			>Scaffold_9:27642073	1		TATGGCCTAAAAGCCGGAAGGGCCAAACGGGGCCTAAAATAAATATGACCACAGGATGGGCCATAGGGCACTTTCTATACTTAGAACTTTACAGAATTGAAAAATTCCGTCGCGTTCAAAAGTTACGAGGGGGTGGCCACCTTTTCTGAAACATACTGTATAGTACCTGTCGATAGGTGCTAGGTTAAGATAGGCAGTAAGGATAGAAAACCGTTATTGACAATATAATCTTAGGTACTACATATCTTGAAAAACGCTCCAACTGGCGAAATCCATATTTGTTGGTAGTAAATTGTGTTGATCTTCTTCTTCGTTCATTTTGCTTGGGGTTGGTGTTGGTTATCCTCTTCCTAATGGTTGAGGTTGGTTGGTTCTGGCACTTCTGCTTTCACATTGTTC…	32759
	Scaffold_1	55694331	55695513	1182			TAAGAAAGGATTTATAATAGACCCCACAATCCGTTTCGAATTTCACCAAGACCAGCCTGAGGAAGTAAATCAAGAGAAAAAAAATATTTACGAGCCAACCATTTCCCACTACAAAATGAAGTATGGTTTAAAAGACATTGAAGTCATTGGAGTAATGATCGGATCTCGCGGAACATTAACATCTGTTTTTATAAATTTTTGCAAGAGATTCAACATCCCTCAAAAAGTCATGAAAATAATATTGCACCACACTATACGCTCCTCAATTGCAATTGTAAGATCTCACTT	2		TTGTACACACACATTGCATAAAATCCTTTGGGTGTATTTAGATTTGTTATTTTTCCAACTCCGGTCTCTTGCTCCTCTCACTCTATCTCCATTATTCAATAAATATTTTCCTCATATTAATCTTTTTCTGTACATTGTACCAAAACACTTCCGTATCTTACTAATCTGAAATAATCATTTTCTTTTATTCTTTTCTTGGTTTATTGTCTTTATCATATCAACTAAGTAAATCACTAAAGTGACTTTTCACTTTTCAGTCTTCAGTCTAGCAAACAAGGTCCCATTTATACAATTAAACAGTAAAAATCTGGTGTAAACATCACACGACTTTCCTTATCTCCCAAAAAGGAGTCGAATTCCGCCACTGGTGACTGAACGGTAACAGATAACTAAAAATCA…	15944
	Scaffold_4	7778506	7779704	1198			>Scaffold_13:20685381	1		>Scaffold_4:47342168	20
	Scaffold_12	7668732	7669930	1198			CTCCGTGGCGTAACGGTTGTGACTACTGCCCGTAGTCCAGAGATCCTGAGTTCGATCCCCGGTCGGAGCAGACTTTTCGCACAGAAAATTCTGTTCCCTCTGAACACGTGAGGCTGGCAATTCCGGCCCTACCCAGGCTGGGTGAGGTTAATGTGGGTAGCTGGTACGATTCCCAGCGAATGGAGGGTAAAACCCCCGTCCTAACCCAGGACGTTAAATTAAGTAGAATCGTTGGCGTTAGGAAAGGCATCCAGCCGTAAAAATGTGCCAAAACCAACCAACCTCAACC	2		TTCTATTTTACAAAACATCAGTTGAAATATCTATTCTGCTCTACTGTTATATGTACAAAGGAAAATTGTGAACCGTAATGTAAATTCAAAAAGTACCTACATATACGAAAATCTGATTCATTTTCATCTATATACATGGGATGTTTCAATTACTTAATTACCTATTGCTATCTTACAACTAGTTTTTGGAAGAGTAACTAAGCCATTAATTAGTAGTGATGAGTTTCGAAAGGTAGGAATTAGAGCGCTTTATTATACTGCCTGAGTTACCCGACAAGGACTAAGAAGTCCCATAGTTACAACAGTAAGCCCAAGACACCTTGTGGTCAAAATGCCAAAGGAAAAATACCTTGTCATGTCCCGGCTGGGTTTCGAACCCGCGACCTCTGGATTACCAGA…	32759
	Scaffold_4	28135251	28136453	1202			>Scaffold_2:49524266	1		GGTATGATAGTTACGGATGTGAGTCTTATTTCAAGGGATGACCTACCTTGGGCGGGCAGAATGTTGTCTGGGCAGCACCCGTAGGCGGTGTTGAGGCAGCAGCCCTCCTTGTAGGGGCCATGGGCCGCCGTCACATTGTCGTCACAACAGCCATGGGGAGTTTCGGCGCAGGCGGGCTTGCAACCCTTGCTCAAGTCTTGACTCAGGGCTGAAATTAAGGCGCCCATCATTAGTGTCTAATCAGCCAAGTAAAAATCGAGCTTGATACAAAACCTATGCTGAAATCTTGGCTCAGAGTAGAAATTTAAGATATCCCACCATTTTAGTACATACGTACTGTTGAAAAAATATTCAATAGAGAATCATTATTATTTATAGTAAGGTTTGATAAGGAATTGA…	32759
	Scaffold_1	6615129	6616331	1202			GCGGAATGTAACCACCAGGCGAGGACATAGACATTATCAAGGGAACTGAAAAATGTGTTGAGTTGGTGGTCAATCCTAGACCTATAAACCGACCTCAGTTTGATCGATAAGGCGGCGGACTTGTAACCTAGAGGTCGGTGGTTCAAGTCCCGGTTGCAACAAAGATTTAGTAAAGCGAGTTTGAGTAGTTGTGACATCGCGAAAGTTATTAACACATGTATAATAACTTGATAACTCCTAGACATATAAAAGTGTTTCAATAATAAATTTACATTAGAGGATGTCTAAT	2		TTGTAAACCAGTTGGGAGGACACAAGTCATGGCATTAGTAAACCGGTTGGGAGGAACACAAGTATTGGCATTTGTAAACCAGTTGGGAGGAACACAAGTCGTGACATAAGTAAACCATTTGGGAGGACACACGTCATGGCATTATTAAACCAGTTGGGAGGAACAGAATTCATGGCATTATTAAACCAGCTCAAAGGAACACAACTCATGTCATTTGTAAACTAGTTTGGAAGAACAGAACTTTCATAAACCTTATAATATACTTACTACCAAGTAGGTAGTTTATAAATTAAATTCTAAACAACATGATAATAAGAATCATAATAGGTGTGAAGTATAAAAGATAAACAAATATCTATAAAAACAAAAATATGTATATCTATTTGTACTATGCATGAG…	16115
	Scaffold_13	77206	78408	1202			>Scaffold_13:19675273	1		>Scaffold_6:41278865	20
	Scaffold_1	63572096	63573309	1213			GGTCATAAAATATTTGTAATGAAGTCAGCTTGAAGATCAATTTTTCAGATTTTATGAGGTTTTTTTTATTATTAATTTTTCACTGAGATTTATGAGAGCATAATATTTTAAATAATTATGACGGTTTGATCTTTAATTTAGGAATGGGCTCTTCACTCCCACCATTGTCAACGTTCCAAAGTTGTATTAACGCTTCCGAAATTTCATATGTCTTATCATTTAAGTACTAGCAACAAAACTTATTTAAACTGTTAGCATTTTTTTTTTTTACTTTCCAAGTCAATATATTACCCATT	2		GGTGGGGCAAGCGGGGCTGGAACCAGCTGAGAGGCTCCGGGTGGGGAAAACGAGGCTGGGACAACCTGCACAACAGTGGCTGGGGCAAGCGAGCGTGGAGTCAGCTCCAGGTGCGTACTAGTGACTCAGGAAGTTGCACGCATGGTGATCTGGGTTCCATTTTTTTTTTTTTTTTTTTTTTTTTTTTCAACAAGAATTGTGCTTTATTTGTACATAATTTCATTACAATGTTTAGGATAAATATTAATTAAAATTAATAAAATAAAATAATATGAGTATGCACTTATACTATCACACTAAGGTACCTGGAGAACCAGGCACCTTGTTTTGTGATAGTAAAGTTGCTTGGGATATTACCTATTCTGTTTGGAATGTAAATTTACCTACATAGTTCTTTTT…	32759
	Scaffold_10	4551927	4553142	1215			>Scaffold_8:200404	1		AATACATTACGTATGTGTTTTTCAATTCAATTCTTTCTATGAAGCCAAAAAACTTATGGATATCCTGTATATTAATAGCTGATGAAAATATGTTTATTTTAATGGCTGCTTTCCGGTTATTGTTTCTGTCATATTGCCAGTGTTGCCACGCAAGTCTTTATAATTATGTTTTATGTAGGTAGATGTCGCTTTTATATTAGTAATTCTGCCGGCGAACATAGACGGATATAATATATCCGTCTATGTTCGCCTATATCATCACTCCATCCTTTTCTCTATCTCTCTATCTATCTATCTATCTCTCTCTCTCTCTCTCTCTCTCTCTCTCTTTCTCTCACTTACTCTTTCTCTTTCTCTCTTTCTTTCTCTCTCTCTATCTCTCTTTGTATTTCTTAGTTT…	32759
	Scaffold_6	8408502	8409719	1217			CATTTTTCGAAAATTGAGCTGATAACATTTCTGGACGAATTAGAAGCTCAGGATTCCAAAAAAGTAACTTTTATCAAAAAGTCTGTTCGTATGTATGTATGTATGTGTGTGTGTGTGTGTATGTATGTATGTATGTATACAAAATATCTCGAGAACGGTAAGAGCTAGAGCGATGAAATTTGGCACGTATATGCAACTCGGCCCTAGTACGCACCCGGAACAAAATCGTAAAAATCGGCCAATTTTTCCGGTACCAGTACAAAAGCATTAATGTATTCACATCCATCACGTTCAAAGGC	2		ATAAAATAACCGATACGAACGCGCGGAAAACCGGAAAGTAGAACTTAAATAAATAATAATAATTATAAAAACACTGATAAAATAAAACTTTAATCGTCACTTCTGACACCACTGTTACGCGCTACGGGTTCGGGGGATTAAAGTTTAAAACGCACTTGAGTTTACTATTAAATAATTAAAATAAAAAGTAAGTTTATTATGAAAATTATAAATCTCGAAAAGTACAATATGTCTTATAACAGTTCTACTATCACGTAACACAAAGTCTAATTACATTTCTTCGGGCTTAGTTTCAAATTAGCATTCCTCAGTCTCAGAAAAACAGCACGTAGGTTGTCGAGTTGTTCTTGAAAGGTTTTTCCGATTACGATGATGTCATCAAGGTAAACTAAACATGTC…	17532
	Scaffold_13	8460122	8461351	1229			>Scaffold_2:42013690	1		>Scaffold_12:22744339	21
	Scaffold_11	4661541	4662775	1234			TTAAGGATTTACACTCAATACAGGAAAAATTATTACAACTTATGGAAACAAAAATGTAAACTTGCAAAACAAAATATTTTAGAAAAAAAGTTTATAACATCCTTAATGTATTGTTTCTTAAGGCCAAAGTTAATATTTAAAAAAATTGTAATACCTCTTGGACACTAAGTCTAGATTTGCGTATTACTTAGCATAGGATAACCAATGCTGAAGTCATCAATGTCTATTAATTTCACCCTAAATATTTCCATTTTTTCCCTTGCTTCTTGAGTCTACAGACTTAGAAAGAACAAAAATCATG	2		TTACAAGTAACAAAATATTTTCAAGGATAGGTTGTCTCTTATATTTTCAAAAGGTAAAAAAAAGATCAAGAGTTTGCAGAAGCAGTCAGAAATATTTCAAAGGTTGCCAAGAAAAGGTTTTACAACTCACCGGGTAGTACGCGCGTCACAAATTTAATCAAGTGTCAAGTGTTATAAATTAGGTCCATATTATTTTTCTTACTAAAATTTCAAGATAAGATTCCAGCCCCACCAATAATATTTCTACAATTTAATTTTAATTTCTTTCGTTATTACTCGAGATATAACGAGTTTTATATGCTCAGCCCTACAACTTAGTAGATATTTAATTACATCAACAAAAGATTCCGACACTTGGTTTGTCTACTGAGATTGAAGTTCCATTTTCACTATCTAGTT…	32759
	Scaffold_12	16715538	16716781	1243			>Scaffold_11:16469448	1		AATAAAATGTAAGTATGAAATAAAGTAGGTAAAACAATAGAGTAAGAGAAATAATCTAGCAGAGATGTATGACTTCACCTCTGCGATCTCGTCCTCTCCGGGGCGTAGTTGGTATATTAAAAAAAGAGAAATAATATTAAAATATAATAGAAAAAATATAAATAAGTGAAAAATATAGTAGAGTGAATGAAATAATAAGAAATAAAAAAAAAAATAAATAATAGTAAAAAAATAATAAATAGAAAATAAGGAAGAGAAAAAAATAGTAATAAACATAATGATAATAAAAAAAAAAAAATATAATATAGAATAGATAAGTATAAAAAATAAGATGAGAATGCGAATGACAGTTGTCACATAATATCTAGTGTGTGGTAATCGGGAAGTATCAGGGTGCTA…	32759
	Scaffold_11	9366400	9367653	1253			AAAAAAACGCTGCTATTTACAGAAAATATTCTAATCGAACAAATGACTAATAAGTTTTATTCCACAAAAATCCATCTGTGAAAGTCGTTGAAAAACTCCTTGAAAAATATTACGTAAGCACATACTCAAATCAATGGGAGTATGAAGTGGTAAGTTGCTCTACTGGTTAATAGAGAAGCGGATTAGTTGATGATTCAAGGCATTTTGATTTTAAGATGAGAAAGAACTCAGAACTTACAAGAAGGTGGAAACTTGACGTTTTGTTTGAACTTCTGAAAAAAGGGACTTTATAGTCATCTTT	2		GTGAACACGTGAGTATATCCCCCCCTCCCCTCCCCCACTCAATGCTTGTATTCTTCCCTTGTTACTGCCTCCCCCACTCAATGCTTGTATATTTTTATTTATTATTTTTTTCCTTTTTAATTTGAGTATGTGAACACGTGACTTTATATCCTCTGCCTCCCCCACTCAATGCTTGTATTTTTTTTTTTTTTTTTTTTTTTTTTCTTCTTTTTAATTTGAGTCTGTGAACACGTGAGTTTATATCCCCTGCCTCCCCCCCTCCCCTCCCCCACTCAATGCTTGTATTCTTCCCTTGTTAATTTGAGTATGTGAACACGTGAGTTTATATCCCCTGCCTCTCCCACTCAATGCTTGTATTCTTCCCTTGTTAATTTGAGTATGTGAACACGTGAGTTTATA…	18487
	Scaffold_2	19127437	19128723	1286			>Scaffold_5:7313153	1		>Scaffold_3:36725346	20
	Scaffold_1	10686515	10687803	1288			CTCAGTTTCAAAGATTTATTGCTACAATCTATTCTATTACAATAAAATATACGTCCATCCTATCATCTCTAGATCCTTACACATCATATTACTAGTTGGAAATCATTTTATAAGAAAAGATCAAAGAGTGTTGATCTATCTTAAGTTATAATGTGGATACAATCATGCAATATCAATGTTTTTTTTTAAATAGTATAACAGTTTTTTCAGAGAAAAAAATATATGTTTACCTACTATAGGTAACAACCCAAAATACTTCATCTGAACATTCAGCAAAGCTTTGTAGTTAGTGTTAGAATTACC	2		TGAAAGCCGTCTACGCTCATGATGAAGTGAGGTAACGTCGCGTCTTTTATAACAATTATCCATCCGTCAACACTGTTGAAATTCCGTCATGAAATGGTGTGCTGTCGCCGGCGCCTGTTTCGAAAGCTCTGCTTCGTGCTGACGGCAATTTCGATAGGCAGTTTGGTGCTGCTATGGAACCACCTGGAGGATTTGGACGGTGAGGAGCCCCTGTTGGATCAGCAGGAACCGGACGACTGGCTGACGCTGAGGTAAGTGAAATTTTGAAACACACACACACACTCACACACACATTTTAGGGCCGTGCACAAATTTGTCAGGCCCCACTGAGGCCTAGGGCATTGTGCCTCGGTTGCTTGGCCTTTTTGGTATTCGAGTGGTTAGAACGTTAGACTAATG…	32759
	Scaffold_1	34700824	34702118	1294			>Scaffold_7:30257825	1		AAACAGAACCTCACTTAGTGAGGGCGCTTCGCTCCCTCACTAAGTGAGATTAAATTTTTAGGACTCCAATGAATATGTATACAAAATTTGAAGAATCCGTTCGAAAGTGATCGCGGAACAGACAGACAGACGCACAGAAACATAGACACACAGACAGAGAAACAAACAAAATCCAAATCGTCCAGTATGCAAGTTAAAACAGAACATCACTTAGTGAGGGCGCTTCACTCCCTCACTGTGTTTGAAGAATCCGTTCGAGAGTTATCGCGGAACAGACAGACGGACCCACAGAAACACAGACAGACAGACCAAAAAAAGCCAAATCGTCTAGTATGCAAGTTCACACAGAACCTCACTTACAGACAAACGCACAGACATACAAACAAACGAAAGCCCAAT…	32759
	Scaffold_8	13207025	13208340	1315			CGCTTTTTAATAGCTGGAAGCCCTTCTTATCGCCTACGATTCTATTTGTTTTTAAACTGCTGATCAGGACAAGGGTGTTACTCTCCATTCACTGGAAATCGTACCAGCTACCCACATTAACCTCACCCAGCCTGGGTAGAGCCGGAAATGTCAGCCTCACGTGTTTGGAGGGAACAGAATTTTCTTCGAAAAGTCTGCTCCAACCGGGGATCGAACTCGGGATTTCTGGAGTATGGGCAGTAGTCACAACCATTACGCCACAGAGGCTGGATTTTTCGATTCTTTTGAGATGATCTGACGAAA	2		AGCTGCTGAGTTCAATGAACGGGGGGCTCGATACTCTCTTTGAACATAATACTACTAGTGAAACGTAGTGAATAGAAGACAGATCCATGATTGGTGATTGATTCAACTTAGTATTTCAATTGCATGGTCATATCACGACGGGGGTGCTACCCTCCATTCGCAGGAAACTCACAAACCTGCTACACACATTAACTTCACCCAGCCTGGGTTGGGCTAGAATGCCAGCATCACGAAGTCTTCAACTCGCTGGATGTTGTTTAACTTAGGTGATCTTACGACAACCGGTGCATTCAACGAGCCATCGACGCTGGCTGAATTTGAATTATTACATAACATGGGCTCTGTAGGGGGACTCTTAGTAATCTTAATTAATAAATTACCATCCTACATAAAAGTATG…	19682
	Scaffold_1	19050381	19051710	1329			>Scaffold_3:20521624	1		>Scaffold_11:21785727	21
	Scaffold_5	12381184	12382516	1332			CCTTAACACGTTGAGTACCTGTCAACCACATGTGGTGGACTTTTGAGTTTCCCCATGTTCCACGGTCACAAGCCCAAAAAGTCATAAGGTCCCAAAAAGGCTGTGTTCCAAAGAACAGACTTCTCGTAAGAAATACATTGAAATGTCAACCACCAGAGAATGCCAGGAACATAAAGTACTGTACCTCAAGTCAACCACTAGTGGTTGACAGGTACGTAGAGCATTGCTTCATGTCAACCACATATGGTTGACAGGAACAGAAAAAAATACTGGAAAATTGCTGTGGTGTTTAACGTGTTAAGGA	2		ATTTGTTTACCTCTGTTAAGTACTCAGGAGTGGAATACAAGGCCTTCTAGTTTTATTGTTGTCTGGCTGTAGAGTGTTTAGACTTGGATGCACTTATAAATAGGTAAGTTTTTATATTCATTAATCCATCAAGAATTATGGACACCAGCCATTGGCTTGAATGCTTTGTAATGTAAAAGCGCTGCACTGATTTAGGGCAAAATTAAAAGAAAATGGTTTGGGACGCGACATGCGTAGATACCCTAGCCAACAGCAATATGAGTTACTCTCTAAGAGGTAGAGGTGAAACAGCTAAACAAGCGGAACTAAAAAAGTGCCTGAAATATAAAGACCTTCAAAATCTCTATGATTTCATTCCCTTCGCCGTCGAAACCTTTGGCTCTTTTGGTCCAAGTGCTT…	32759
	Scaffold_13	15043943	15045283	1340			>Scaffold_1:3080979	1		TGACAATTATGATGGCCAGTTTGTGTTTGTGGGGAATAAGTTTGAACAGAGTGTAAGTCGAAAATTGGGACCGTGGCTGTTGTTACGACAAGAGTTTGAAATGAAATTAAGGGCGAAATTAATAGACAAATTCTTTATCCCAAGTCATTGCTAAGCGTTGGTTTTCCCAATCTTACATAGTACGCAATCCATGACTTAGCGCCACAGAAGTATTACAAAACGTCTATTAATTCCGCCCTTAATATTAAAGTAGTGCTTATCTGATGGATAATAATATTACTAAATATTTTCAACTTTAAAATAAAGTAAAATAAAATGACAGAGGTTTTCAATCAAGTTCTTTGCAATAAAGTACATTGAATATTTACATAGAAATTGAAATTAATAAAACAAAACTAG…	32759
	Scaffold_8	9270347	9271694	1347			CTTCCAGCACGGTCCTCATCAGCGACCTCTTCCCGGCCCTCCAAAAAGGCCTTGTGCCACCGAAACAAACCACTTCTTGCTAAAGCAACATCTGGGTAAGCCTGCTTGATCATATCAAACGTCTCTGCCTTAGATTTACCGAATTTCACACAGAATTTAATCGCGTACCTCTGCTCTAACGAACGCTGCATTTTCGGCTGGCACCACTCACAGAAACACGTCGCGCGAAAATGCCTGTCCTGACTCTCCAAGTGCTCGGAGACAGCTGACCAGCCGCTCGTTCGTTAGCTAGGAACCTACTCTACC	2		TGTCTCATTTCCATATTTATCAGGCCAATTTGCACCGTTTATGTCCGATCGAAGCTGTTGGTGGGATCGACGAACAAGAGCAGTTGATCCATCAAAGTGATGGTAATATCTCGGTGTGTCTAGTTCTCGATTTTATTAGATTGCAATGTAAATTAATACATTATTAATTGGTGTCATGTTGCACAGATTTGTATCTATGTCAAGTGATCGAAAATTGTGTTTCGGCTCCAATTTTGAGTCCATGGACCGTATTCATGAAGCATTTGCTCGTGAGAAAAAGCTCAAAGTAAAAGCAAAAGGTCTGAAGGAAAAGGTAGAAGTAAAAGCAAAAGGTCTGAAGGAAAAGGTACAAGTAAAAGCAACAAGTCTGAAGGAAAAGGTAGAAGTAAAAGCAAAAGG…	20087
	Scaffold_2	28033861	28035209	1348			>Scaffold_11:14957917	1		>Scaffold_10:10765959	21
	Scaffold_5	13363026	13364395	1369			CTTTGTATTTCAGACCATGTTTCTTGTGTTTACTGTAATATTTATTTAAGAAAAACAGCAAGAGATTTATTACATCATTGTGAGACGTGTTACGCTATGGAAAGAATTAACAAATTATATAAGTGGATGTGCTATACATGTGATTATCACACATATCATATGCATAATATGTTACGACATGTTCGTAAACACCTTGGTGAAAAACCTTTTAAATGTTTTCATTGTGATTATACTTCTATTACACTTGCAAATGTGAAAACTCATGAGCAAATCCGACATTCTTAAACGAAAAAAAGAACTTAATGCA	2		GTTTTTCTCTCAAAACACGTGAAATCTCAGTTCTATCAGACAGGGATCCTCCTTTCATCTCTCTGAAGTCTCTGATCTCTCTTGAAAAGCTATTCATTCGAATTCCATTGAAATCTTTAATCTATTGCATCGCCTCCAATAAAAGTTTCTAGTTGTTACCTTTAGTCATATAAGAGAGCTCTTATCTTTAACCATGGCAAAATTATGTCTGAGTAAGTACACCTATATGTTTATTCTACCAGGCAATACAGATTACACCCTATAATAATACTTTCTGTGAAAAGTAACCTCTAGGCAGGGTAATTGTCAGAGTCTTATTATTATGTGCGGTCACATACTCAAGTATATGATAGAAAATCTAAGCTGGGTGGGAGCCATTCCCTTTGTCAGATGCACTCA…	32759
	Scaffold_3	44977294	44978682	1388			>Scaffold_4:5255500	1		ATCTGCGTGAGCATTGACGGGATCACTTCTTCAAACAGAACACTAGCTAACGGCATCCGGCAGGGGTCGTCTCTATCTGGTGATCTGAGTAACATCGCCACTAGTAACTTGGCTGAGTGCATCCCAAGTGACGTGTCACATGGTTTATTTGTGGATGATATTATACTATACATGCGACATCATGATCTAAACAGAATAGAAAACACGTTACAGATAACATTAGATAAAATTCATAGTTGGTCTAACTCTAACGGATTTACTTTTTCACCGGAAAAAACGGTTGGTATCTACTTCACTCGTCTCAGGAAAAAAACCACACCTTAATTTACACTTTCATAACCATCAAGTAGAATTTCATGAAACGGCCAAGTACCTTGGTCTCTACTTGGACAGCCAATG…	32759
	Scaffold_4	35216244	35217634	1390			GTCGTATTATCGAGTACAAAATTTGATACACCGCAAACTACGCTTAAGAATCGCGAGCGACTTAAAAAGTTGATGTCAAGGCTGTCAAAATAATTATGTTATTTATGAGCGCACTATTAGCCCAGAGGTAATCTATTCGTTTTCCATACGGAAGGTCCCGGGTTTGAACCCGAGAGCCGACAATATTACCTGTTATTTCATGTTTACGAAATAGGTACAAAAGACTATGAAACTCTCGTCTGAATATTTTTTTTTTTTTAAATATCCATTTATTTATGATTCTTTGTAATAATTCAATTGAAAGTACA	2		TAAGGCGCTAGTCTGGTAATGCAGGTAGATCCGTTGGTTCGAATACCACCTAGTGCATGAATTTTTCCTCATGAATTTGAGTTTGTAACCTACAGGAAGATAATAATAAGACTCTGAGGGTTAGGTGGTAGAAAATACTTTGAGTGGTTGATTACCTTCCACTATATTTAGAATCAATAATAAATTCAAGGCATTTATTTACTCGTACACTTGGGCCAATTTTGTGTAGTAAAATAAAATTGTGATACACTCACATAGGTAAATTTAATCAAAATTACACAAAAACGCCTGAACTGTAAAAAGAACTGAAAATTAATTACAAGGAGGAAAAAACATTTATTTACGAGTATTTATATATACATATATCTAATGTATGTTATCATCATAATCCCCAGCATA…	21779
	Scaffold_7	32758475	32759878	1403			>Scaffold_8:14055921	1		>Scaffold_6:21435947	20
	Scaffold_10	13651287	13652695	1408			CTCTACTCTTGGTACAGCCTCATACTCAGTACCCACAAAAAGTAAACGTCTGGGCAGGAATAGTAGGACAACACATTATTGGTCCAATATTCTACAATGAAAGTCTAACTTCAGAACTCTTCCTCGACCTCCTTGTTCATGAAATAGGTCCATTAATCACAAATGTTGTTGGTGAAAGAGAAATTTTTTTTCAAATGGACGGTTGTCCAGCCCACAACTCAAGATTAGTCAAAGAGTTTTTACAAGCAGCATTTCCAGGAAGGGTGATAGCTCACAATGGTGATATTGATTGGGCAGCAAGATCACCC	2		CTCTAATATCAATACAAAACAAATGACTTTTCTAAGAAAATAAAAATAATTTACCTAGCACAACTTATTTACAACAAAGGAAAGTTTTTGTCATTTTTTAAAGATAGTATAACGAGCTTTATCTGAGATTATAATTATCCTTAGAAGATGTTTGATGTTAGGGAAGAAGTCGTGATTTCAACCAGACTCAATAACTTCACCAAAAACTTCCTTGTTGGGCTTTTAATAAAACACAAGGACGTAATGTCTAGGATTTGAGAGGATCAAGCTTGCTCTACTTTTAAAATTAAACGTTGTGAACATTTATACTTCACATAGTCGTACTTATTGTGAAAAAAGAAATACCTATTGATAAAACATATCAATTTAATATTTTAACAATTTTATTTTTGTGTATAT…	32759
	Scaffold_2	1554882	1556290	1408			>Scaffold_12:20482517	1		CTCGTAATTATATTTATTTTGTTCTCTAAAATTGTATTAACTTTCCCAAAGCTCTAGGACCGCGCTGTCTCATCTCTAAAAGAAGGCCAGACCGCAATAAATCACTTTCATCTTGAATACGTCGAGAATTGCATTTCTCCATTACCGTAGATAAATATACTTTAGTCACATTAACCAAGAGATAAATTTATTCCCACTAGATAAAAAGAGAGGGAAATATCTCAGATATCTCCTTTGAACATCTGTCTCTGGGGAATGATAAATTTTCGTAAATTGAAAAATATCATTGATGGAATTTTCATTAGAGCACAAAATATGACTGGGATTGGAAAAATTATGGTGAATTTTTCACTTAATTTTGTTTGATTTATTAGAAATATTATAACTTTGAATTTTATG…	32759
	Scaffold_4	45459423	45460836	1413			GACTGAGTGTTTTTTGTCTGTTACCATGGTAACGACTGAATGCTTGTTGTCTGTTACCATGGTAACAACTGAATGCTTGTTGTCTGTTACCATGGTAACGACTGACTGTTTCCTACTTAAGTATGACGAAGGTACTTCTGATTCAAGACATTCCCCAGATATTTTTCTGCTAATTCCAACTTCACTTCATTCCCGGCCGAGACTGTTATAATTCCTTGCTGTCAAGTTGTGTACGTCCAATCTGCACAGACTGAATTTTTACACAATTTAGGATGTGTTCAAGTAAGATGTTTTATCTTAGGTTTACC	2		GCATTCGTTTATTGAGTCGTCAGTTATACTTATACACTCAATTGGCTTGGAGTTGTTTTCTTTGTTTACATGTGCTAAATTTGTTTTCTTCAGTATAGGGACTATTTGTGTGACAGAAGTATTTTTCGCATGGTTATTTATATTTACATCATCTGTATCATTTGTTTGGTTTTCACTAGAACTATTTTCTTTAGGATCAGAACAGTTAGTATCATGACAAACAATGTTAGAATTAAAGCTTACTTTAGATGTGATTGTTTTATTAATGTTGTTTTTTGTTTCCTTCCTCAAAATTTGGTTCTGTTCAAAAGCATTTAATTTTTCAATAAAACTATGTTTACTATTACTAACTTGAGCTTCACACGAATGATTACTTTTTTCTACAACTTTATTATTATT…	22429
	Scaffold_2	5681249	5682670	1421			>Scaffold_9:5544238	1		>Scaffold_8:12040207	20
	Scaffold_8	31487249	31488674	1425			CCGAAATCCATGACATACTCAACGGGGAAGATATAATTAAGTTCATCAAGTCTCAACGAATAAGATGGTTTGGTCATGTACAACGCATGGATGAATCGAGAATGCCGAAAAAAATCATGAATGCAAAAATTTACAGTGCCAGAAAAAGAGGAAGACCCAGGATGAGATGGATCGATGATGTCACTAAAGACCTGCAAATGATTGGAGTCAGAGGATGGAAAGACATAGTAAACAACAGAGTTGAATGGCGAAGCATTGTTGAAGAGGCCAAGGCCCACCCCGGGCTGTAGTGCCAATTGGTAAGGTAA	2		CCGCCCCGGGGCGGCACCTCCTGCTTGATGAGGGCCTCGCGCTGGAGCCGCGTGGTGACGCCCGCCGTGTTGAAGATGGGGTCGAGCAGGGGCAGCGAGGTGTTGAGCGAGTTCACCGCGGCGCCCTTGCCGATGTTCTTGTTGCCCCGCGTCCGGGCGCGCGACTTGTTGTACCCTGAGGGGCGACCCGAGAAATGGTTAGTTTTAACCTCTTCGCGACCAACACCATTTTTTGTTTTGTAGTACAAAGTGACGGATTTCCTCATCCGAGGACAAATATTTTATACTACTTAGTAGTATAAAATTTTAGCTTGGGCACTTGGGACTATAAAATAAATGTCCTCTTACGAACATTGGGCGCGAAAAGGTTAATCCAAGCTTTACTTGGAAAAATATAAC…	32759
	Scaffold_1	36462990	36464437	1447			>Scaffold_3:28496091	1		GAATGCACAAGGACCACATTATGAAACAGGATTAATGTTAAGCTAGGCCAGACACACCCACAAGGCGGCGCGGCGTTCTGAACCGATCACAGCCCGAGTTCAGAGAAAGTGTCGTCCCTTAATGTACAATCTCAAAACGAAAAAAATAGTATCAAACAACCGGTCAATCTACATCAAAGAGAGATAGGAAAAAATGACATTTGAGATGACTTTTACAATAAAGAGAAAAAATTGTCAATATGAATCAGCGAAAAATTTTAAAACGGAAAATGAAGTCCAAACGAGAAAAATTGTACCGTTTTTAAGTGACATTTACAAAGGAATGAGGGGCGAATATGAGGGGTAATATTGAAGAGTCCAATAGGTAGGAGTGGAGGGGATACTATTATGAAGAAAAAT…	32759
	Scaffold_11	7433565	7435028	1463			TTTTTTACGATTTGGTTTGTCATATTTTTTTACACCTGAACTGAAAAAAACACCCAAAAAAACTTTTTTACTAAATAAAACACTCGACATTTGTCCGAACAAATGTTGGCACAGACATGGGCAAATTTGATAAAAGTTGGCGGCCGACCCGAGGATGCTAAAAAATAATTTTACGATTTTTTATCACGTGATCTTCTGGGAAAAATTATTAGATGTTTGCCAAAAACTCTTCAAAAATCCTAAAAGTTTTCTAGCTGTAGACTGTGTAAGGGCGTCCTGTATTGTTTACAAAAATTGTTTACATTGCTT	2		AGAGGAGGGAGGGAGGGAGAGGAGAGAAGAAGTGGCAAGCAGAAGCAGTAGTAGCAGTAGGAGAAGCAGTCACTTTTTCTTTCACCCTCATCGTGGAGCTGTTAGCTGAGAATACGAGAAATGTATAGCCATAAATATATATGTACGTACACAGAAAATAGCGCAAACTTTTTCTCCCCCTCCCACTCCTTTTCTCGCCTTGATGCATACAAGTTCAAGTTGGAAAGAAAAGTTTTGCACGAGAGAGAGAGAGAGAGGAGGGGGGGGAGAAAGGGAGACGCCAGTACGTATATAGTGTATTGTACATAAGACATTGTATATACGTCATACATAGCGAATTTTCGTACACAAAAAAGAGAGGAGGAAACTTTTCGCCGGGTTTTCGTCTGTTTGTGGTGG…	22995
	Scaffold_8	10752003	10753467	1464			>Scaffold_1:19438521	1		>Scaffold_5:31624931	20
	Scaffold_12	22870839	22872317	1478			TGTTGTTGGTGAAAGAGAATTTTTTTTTCAAATGGACGGTTGTCCAGCCCACAACTCAAGATTAGTCAAAGAGTTTTTACAAGCAGCATTTCCAGGAAGGGTGATAGCTCACAATGGTGATATTGATTGGGCAGCAAGATCACCCGATCTATCCCCAAATGACTTTTTTCTTTGGGGTTACCTAAAAGCAATACTTTATCACGAAGGTAAAACATACCCCAATGTAGAGGCATTGAAAGATGCCATCACCCAAGCATGCAACAACATAACAGCACGTCAATTGGCAAATGTTCGCAATGAATTTTACGAC	2		CCTCTTGAGCAGCTGCTTGAGTTGCTCACAGGAAGAATCCGCTGTGGCACGATTGCTGACCAGGGCGCCACTGTTTACATTCGAGTTGGGTGGAAGAGCGTTGCTCACGGGACGTAAGCACTCATCAGACTCTGTCCTATGAGGCAGTAGCTGCAGAAGGAGACGAGAGTTGATGAGATAATGGAAATTTTCAGTTCAGGATGACGAGGTAATATTAATTCCTGTGAAACATGTCTTCTCAATTTCCATACAAAAGAGCAGTTATCTGAATATCATGACATTTCTACTATTTCTACTATTATACGCGTAGTAATACTCCTTGTCCTTAGCAAACATCTAATTTAGTACAATATAAAACAATATGTAAATATTTGTTTTTTCAAATCTGAGAAAAAGTAT…	32759
	Scaffold_5	32889765	32891252	1487			>Scaffold_8:14271185	1		TTCATGAGGTGTAAGGAGTAACGCGATCAGAGGAATGGTTTAGAATAGCGCTAATGTCAATACTGATAATGAATTAACTTTAATTTTTGATTTCACATTTTGAATTCTAAAGGTGATACTCTTTCTTCAACCTTCATTTTAAGTTATTTTAAGCCATCGTCAAACAAAAAACGTCATCATCTTGCACGAGAAGAAATCTTAATTTGCTGAAAGTCTTTCATATACCTACTAGGGGGAGGAAAATTATCGTAAAAAGAGCTGAAGGAATTCAGTCTGATAACACAAAGAGGATAGCGAACACGCAGGTAGCAGACATAGGAGGTAGGTACGAGTACATAATGCATTCCAATACAAACTACACAATACGACCATTAACTCATTGTATTCTCAGACCAAGAA…	32759
	Scaffold_2	37507905	37509403	1498			CGCTAGTTTACTATAAAAACATTTTGGTGAGTCTTGGAAAAAAAGGGAAGATCTCAAATTCTACAAATTAATACTGGAAGAAGAGGCTACTGCCCCACATGTAACTGAAGAAGAAAATGATGAAGATTGTTTCCCAGAAGAGAATGAAGATTTGACTGTTTCTATTTGACTCATGTTTGTCTGATAAAAATACATGCCAACTTTTATTGAACAAAACCATTGAAGTAGGTACCAATTGTTTTCTTTTATTCTATGATATTATCAGGCATAATTGACTGATGATAATAGATTGTGCTGCTGCAAAACTCTTT	2		AAAGAAACATTAGCTGAGCCTCAAACTAAGACATACGCAAACGTCACTAAAATGGTAAAGTTGCCAGGAATTAATAAGCCAGTTCTTCCAAAATCCAAACCAACCGTTCTAATCTACCCAGATGAAAATAACAAAGAAATAATGACCTCGAGTAAGAAGACTAAAGAAGCCGTAATGCATGCGATCAAGCCCTCAGAAGTAGGAATTCAAGTAGAAAGGGTGAAAGAAATCAGAAATGCAGGAATATGTGTGCACTTATCAAGCGATGAGGATGCACACAAACTACAAGGTATGAATACACTCAATGAAATTGGCGTCACGTCAAAAGTTCCAGGAAAGAAGAATCCTAGGATAGCCATATACAATGTTCCATCGGAATGCGATGATAGTACAATTTTG…	23278
	Scaffold_2	51203552	51205084	1532			>Scaffold_2:23466482	1		>Scaffold_4:12679154	20
	Scaffold_7	18849641	18851177	1536			TTAACCTATAATAGAACTGGAAACAAGAATTTTCTACTTCCACTTTGGTTAACTTTGGAAGTGGAAATTTTTCCTCTTCCAAAAGAAAAATTACTTGCTTCCAGTTTGGTTCATTTTATTTCCGTTTGGTTAACTTTGGTTAGAAAGAAAAATACGGCATTAGTTAACTTTGGAAGAGGAAATTTTTCCTCTTCCAAAAGAAAAAATAATGACTTTCTTCCAGTTTGGTTAATTTTATTTCCGTATGGTTGACTTTTGTTAGAAAGAAAAATACAGCTTATATCTATAGCCGTGTTTTTCTTTTGGATAAGAG	2		TTTCACCACTGGTAAAATCTCCCGTTCACGGAAATCAATCAGTTGTATTCTTTGTTGTTGTTGTTACAGTGTTCATATCGGTACTGCCGAATGTGATGGTCCCTCGCCGGTCAAGTTATGAATAAAATGCTGTATTGTCCTTTGCCCTAGTTCCTAAAACCAACTTGATAGTGGGCTCAGCAGAACTTAGTTAATGAAGGAAGGGACACAAACATTATACTATGTAAAATTTTAATAAATGACGTGTTCATTATTTAACTTTCTTAAAATGTGAAAGATGTAAAAACAGAGTAAACAGACAAGTAAAAGAACTTTAAATAAATTTACATAAATTCTACTGACATGAATGTGTCAGTGAGAAATAAAATGTACTAAAAGGAAAAAGATACAACATGAGAT…	32759
	Scaffold_1	49761651	49763187	1536			>Scaffold_13:76493	1		TAAGAATGAGGTAAGACTGATTCTTACGTGAGAGTGAAGTAAGGTGCACTGATAGTCAAGTGGTTAACGCGCTAGTCTGGTAATCCAGGTAGCGTAGAGATCCGTTGGTTTGAATCCCACTCAGTGCATGAATTTTTTCTCATCAATTCGAGTTTGTGACCACATAATAATAAGACTCTGAGGGTTCGGTGGTAGAAAATACTTTGAGCAATGAGCATAACCTAGCCTGGTGGTTACCTAAGTTACCTTCCACTAAAGAGTATTATTAACACCGTTGCGAAGATACAATGAGCAGGTATGGGCAGATGACTTCGCGCTGTCAAGGATAGATGTAAACCCGGCTGTCCCAGCTAAAAGTTTAGGCTGACGACCCTGGGGATGGAAAATGTATAAATGAAT…	32759
	Scaffold_6	7405844	7407382	1538			CTTCTCCTCAAGAAAATCCTGGCAGTAATGATTTAGTAGACTAGGTATAACATATTCAAGTCTTCGATCTCCATAAAGTTTGGTATAAACGTGAGGCCGTCTAAATCTCTGCAGGCGAAGTGAATAAGGTTGGTCGGTCTGCTGTCTATATTCTTCTTTATGAAAGTTTAAACACAAAAGTATTTGACTGGAAAGCTGGTGTGGGATCATGATAGGTAGCTTTTTGTTATTATGAAACAGGAATTTCCGAATTCTGCTTTGAGCTCTATTCAGTGGTGTTTGAACATATTGTGGAGAGAATGTGTACAAGGGAG	2		TAATATTATTATGATGGTTTAAACATGGGTAAACCCCGTTAATTTGTAAAAAACAAAAAAAACAAAACAAAAAAATTAAGTTAATTTTTCAGAACATGTAAGGAGGCCTTCAGCTTTGTCTATGCGTGTTTAGGATGGCGACTTCAGTTTAACTTAACCCTTTCAGGAAGTGCGATCTTATCATTCTTTTAATTAAATGATAATATCTCAGGAATACTCGGATTTATAAAGTTAAATACCTATTTATTTTGTAGGTACGTTCTTACTTGGTTCCCTCAAAATGGATCGAGTCTTTTCTCAAGAGTTACGTTTGAGGTTCACTTTGTATTTTTATAAATGTAAAAAAAACCGACCGAAAACAATACTTTCTACACCTTATATGTTTTTAACACCTTGAAA…	24687
	Scaffold_7	25005507	25007045	1538			>Scaffold_13:14924544	1		>Scaffold_9:11823332	20
	Scaffold_7	37845752	37847298	1546			TGTTCAAATAGGTAAAGAACAACAGTACATGCCTAGTCAGCCCCTGATGAGGGCTCATCATACGAGTAAGTACTTGTACACAAAACTCTATAACTTGATGGGGGTGAAGACACGTCATAAACTCTGCACTTTATGAGTCCAGGTGTGCCGGATTCCCAGGGTCTGGCCGGTAATAACTTTCCAAGAATGTGTCAGGAGAAAAAGTGTCATTGGATCAGGTGTTTCCGTCAATTTTTCTGCCTAGGGAGAGAATTGCCAGTGGTGTACCGACTGTGCAGACGAACAATTTTTCTTGGTATTTCAGACAGAACCAACA	2		CTTTTCTAATCAATCCTCCTAGATTTTTCCCAAATTTCCCAAGCGAATTTCCACGATTTTCCCTTATCAAAAGACACAAGGAGAATTTTATAAGGGTGATCTGGCTGGTGAGAGATAAATCTTATCAAATTGAACTTCTGGACCTATTTAGTGAATATAAGAAAGTCATTTTTATTTGCCGTCTAAATTCTCTACAACTTCATCAGTTAACTTCAAACTTATAGCTTCTTATCAGGTAAGTTATCATAGATCCCTTTGGAAACCTGCTAAAATGTACGAAAATAAAAGGGGTGGTGAGAATGCATAGTCTTAGACCCAAGTTCATAGTTGCCAATGAACAGTTTAAATAATCAACTTTATACACAATCAAATGGCTAATGGCTGTGCTCAGGCTGTTGG…	32759
	Scaffold_5	21260544	21262108	1564			>Scaffold_7:20852453	1		AAATCAACTGCTATGACAGCAATTTGTGAAAATTCGTTATGACAGAAAAAAAATTACGGACACAATACTTCCTCGTGAAGAACTGCAACTTTTTTTGTTAAATTATTACACAAAAACTCCCTCCAACTCTATGAACTGGGAGGGTTCCTAACATTGAGGTTGCATTAAATGCATTACCCATCTGGTTTGCGAGGGACAATCTTTGGCGGAGATACCATCCTGCTGTTGTGGTGCCTGTTAAATGGTTGTCGCTCACAAATTGTGCTTATGAAACTTTTGGCTTCTTTGCACCATGGCATACATGGCCCAAGTCACCAAGAACCGCTTGTGCGATGTTGATGAATTTGAAATAGGGCCATCCACATCTTCCATATGTGTACAAAATTTCGTTGAAATCCG…	32759
	Scaffold_1	33061444	33063011	1567			AAAAGTCAGTCAGTGTCATTTATTTAGACCAAGATAGAGTACAAAAATGTCAACAATGTAATAGATCATCTCCTTCTGAATGTCTCTAAGAAGTGTTTTATTTTCAGATGATTGAGTGGCAGAGATTGCTTGAAAATAATTTCACATTTTATTTATGATTTTGTTCGTGATTTCGAGACATTTGTTGTCACAGTTTACAACTTTTGCCACTTGTCGTTCTGGGTATTCTGTGTCACAACGTGGTCTTGAGGCTGGGGAAGTACAAGAACTGGGGATGCTTCAGCACCGGATGTAGAGAAGAGACGCCCGATATTTCCG	2		GAACTGGGCATTGCCGTGAGGAGCTTCAATAGAAACATTGACGGAGTTGTGGTTGTCAGCAAAGTTCACGCGAACCTTCAATTGGTTGCTTGGGTTGGAAACATCAACAATGTTTTCAGTGTTGTAAGCAAATCCAGCGTAACGTGCAAATTGGTAGAGTTTGTAGGTTGCGTTCACTAGTTTTTGAGGCACCTTCTCGTATTTGATGTTCAGAGTGTATTCGTCAAGGGCGTTAGCTCTAGTGGTCATGTTACGGCAGGCAGGGAGAGCATTGTCTCTTTGTTCCATTTGTTTGCGGCATTGTTCAGCTTGTGGGTGGTTGGCGATGTATTGTTTGCGGGCTTCGGATTGGTCGAGTTTGGCTTTGATGGCAATCTGAGCTCCAGATTGAGCATTCTC…	26573
	Scaffold_8	5491281	5492879	1598			>Scaffold_3:14448478	1		>Scaffold_5:15061791	20
	Scaffold_7	21357582	21359193	1611			CCGGGACGTCCCGTATTTTGGGCACTTTTCAAAATGTCCCGTACGGGACACGCGTGTCCCGTATTTTCCCCAGTTTCACCATCTCCTCTGGTAATTTAGGTGATAATAAACTGTTACGTAGAGAGAGTTTTCTCTCAAATGAACCTGAAATGGACAGACATCAGGAACAGGTGTTCGGCTGACATGATTTCAACTGAACTAAAAATAATGTTCAACTACAATATCACTTGTACCCAATTTTACCAATATCTCAATGGTAAAAAAGTTTTTGTCAAAAAAATACAGTCTAATCAAAAATATGAGAAGTAATAAATAAATCTG	2		GACAATTTTTTGGCAAAATTTGTATTGTAGCAGTGTAGCTGTGTTTATTTCACAAATTTTTACAATCAAAATGGAAAGCTGAAGTATTAATTTACGGTTGAGAACCCATTTACATTTATCTACCTGTTTCCTCAGTTTCCTGGTGAAACTCACAACTCATCAGAATGGCAGATCCCCTCAGTTTGCTCCGGCAATATAACATAAGCAAGAAAGAAATTATTGAAAGGGAAAACCAAATTATTTTTGGAGAATTTTCATGGCCAAAAGATGTCAACACCAACTACTTGCATTATCAGTAAGTATCTGGCATATTATTCCAGAAGGCATAAAGATTTTCTGACACAACTTACAATTTTATTGATGTTGTGAAGGTCCTGAAATTTGGAATGAGATAGAAGA…	32759
	Scaffold_10	18512478	18514096	1618			>Scaffold_1:37402641	1		AAATAAAAATTAGTTAAAAAAAAAAAAATATGTTAATCACTAGTTTATCAAGCTGGTTCCACATTTAGTATCGCACCACATTTTATTATAAATCAGACATTTCAAATAGAAAACGTTTAGAATGAGGTGTTTAAAACTGCGAGACATAAGTCAAGCTTATGTTGACGCCTGTGTCCTGGACAATGTTGGACATGCTTCATGTGTATAACTGGAGGTTATGGCTAAAGCTATTTGGAACCCATTAACATTTACATCTTCTGCGTAAAGCTGTAAAAGTAAGAATTTATGAGTTCGAAATAAATGTTTTTGGAATAATAAAAGAATGTGTTGAATATTATTACTCATTGTTCCCCTGCCCTTCCTACAGAAAAATAACATGCGGGTGGGGTAAGTCAACGG…	32759
	Scaffold_8	14006095	14007713	1618			GGGGGAAAAAACCCTTTCACCTTTCATCACTGTTTCTCCGTACCAGTAAATTTCCGTTGGATAAAATGTTGTATGTGGGTTAGTTTTATGTTCTAGATGTGCAATAAGAAAGAATTCTTTAATATTCCAACGACAGCCACTGGGAAAAATGCCACATTCAAACATTTTACGGGAGTAAAGTTTTTGTAAATTAAAAGTAAATGGGGAAAATTCACATGTGCATATTAGAGAAATGCTTGTTAGCCGCCTTCCTGCTCACCAGCAGGTTGCCAAGATGACAAAGGTACCAGATCGTGTAGGTATATGCAAAGATATTTTAGATGAAGT	2		TTTACAGAGTGCTGCCTTTAGCACTTAGCTACCGGGACAGACGGAAAATCAACCCCGTTAAAAGAGATACCTGTATAAGAGAACCATTTTCAGATTCCTTGAGTTCTCTTATATCCAGGTTCGACTGTAAATGATAATTTTAATGCTTTTTTTTTCTTTGTAAGCGCTTTAACCTTGTCAATATACAGGTCATTCGCGACAGCCACAACATTCCCCTTCTAAAAAATCGATAAACTGAATTCACTGTAGATACCGTAGATAAGGTATCATTTATATTAATAGGTAGGTACCTACATATTATTATATAAGTACCTGCCCTAATATTTCACCTTTCTTCTCTCTCAGAAACAAGTTAATTGACCAAGATAGACCAATGCAGAAACGAGCCATATTACTTGG…	26941
	Scaffold_8	23319402	23321020	1618			>Scaffold_7:5826303	1		>Scaffold_13:8343832	20
	Scaffold_12	15365154	15366773	1619			CCTCATTATGGGATAAGGAAAGTTAAAACTAAAATGTAACACAAAAATAGGAACCCTCAAGATTTTGTTAATCTTATCAAAAAGTGGTTAAGAGTGTTTTGTGTTTCTTACTAAAGAAGCATTATCACACAGCCTGGAATACTCGTACAGTGGCGCCGCAGGCGAATTTTTTTTATTTATCATTTTCATGACAAAATTGGATCTTGAAAAAAATTCCCTGACTTTTGGTATTTTGTCACAAAATTCCCTGACTTATGGTATTTTTTCACAAAATTCCCTGACTTTTCCCTGACTTTTTCGGTCTCGAAAAATTCCCTGACAATTCCAG	2		GCACAATTTAATATTTATTTCTCTACTTAATTGGAAAGTTGATTTCAGTTATATTTATTTGAAAATGCGTTTCAGTGAGCAGTGAGAAATACCTTTCGAAATTTTAATAATAAAATTGTATTATTATTTGAAAATAATAATTATAATGATAGGCAACAAAACTTCTTTTTATCCATTTTTAGGTATCGACCTACCTATAACATTGTTGTTGAAAGTAGAAAATCACCTCTAGTATTTCTCTATGTCTCATCAACATTTAAAACAACAATAATATACTGGATCAATATCTGTGGTTGGGTGGAAGAGCAAGAAGAATCCTGCCACAGAAAAGAAAGTAAAAAAAGTAATAAACCCCACCAATAATCATAATGTCCTCAATATAAATACTGACGGGATACA…	32759
	Scaffold_6	23192674	23194295	1621			>Scaffold_5:10818261	1		GGATGCTATTTTAAATAGATTTAGATCCAGATTTACTCTCACCGATAATCTATTATGTGTTATTATTATTACATGTCCTTTCATTTATCAAACCGTTAGAGATCGAACAATAATCCTTACATAATTGTTGGTAGAGGTAACTAGTAACCACTGTAATTGTAATGCTGCAACAACTCTAACATTTTTTTTCCTATTGTAGGTACCTACTATCTCATTAGCAAAAGAAAATACTTTTTACTCTTTAAAATTCGCAAAATAAAGAAATAAAATGCGATGGTGAACGAAGTGGTTTCGTAACACAGTTAACGTGAGAATCCGTTGGTTCGAAAACCAGGCAGTGCATGACTTTTTCTCATGCCTATATCTACTTGTGAGTTTGATTAATGGCAATGGGACTAA…	32759
	Scaffold_1	27049323	27050947	1624			TGGTGTCTTTTGCACACGAAGTGTATTTTTGGGGGATATCAGATATTTTTTGTTGGTTACATTTTTTGAAAAGTTCACGCGAGCACCAACTATATCCTTGAAAATATAGGTGGCTTGAACTTTTTCTTTCTCATCATCTCTATTTTTCCCGGTAGCTCAGTAGCTCAGTCTGACCCGGTAGCTCAGTGGTAAAGGCGGCACTCTGTGAATCCAGAAATTCCAGAAGTCGCGGGTTCGAAACCCAGACGGGACATGACAAGTTATCCTCCCATTTGGGTTTTTTTTTACCACATAATAATACGTCTTGGGCTTACTGCTGGAATAATGG	2		TCACAAGCAAAAAAGCACAAAAGGTTGGTTTTTGTGTGCGAGAGAGTAGAAAAAGAAAATTTATTAATAAAACTCTGTAAATTTTGTAAATACCTAATTTATTTTAAATTCCCTTTCGCGTTATTATAAAAAAAAGAATACGTATAAATCACTTATTCCTACAGTTAATTTCACTAATTTTTAGAACAATTTCTTTCTAAATAAAGTAAACAATCGAAATTATTTAGAAAATCGCGCAAGAATGAAAGACGAACGAGAAATCAAGCAAGAGGACACCGCGACTCGCTCCACGCAACAACAGATCTGAAACTAAAACTAAAAACTAAATTTAGAATACTAGCGTTACTAACTGAACTAGGTATAAAACCAAAAACTATTCTTTGGAAACTGAAGGAGTAT…	27045
	Scaffold_9	20226487	20228111	1624			>Scaffold_4:261501	1		>Scaffold_5:21012845	20
	Scaffold_3	19075743	19077369	1626			AACGGTACGTCAGAATGTGGCCTAAAATGAATTAAATGAACGCTAATTTTGTCTAATGTGTTATTAAATAATAAAAAATATAGGTCCTCGCGATAGATTTCAAGTTCCAGGGCAAAGACTGTCTTAAAATCGGACCCTTCCTCAAGGAAATACTTGAGGAAGGTCATAACTCAAGGACAGTTTGGAATTTCGGACTTTTGATAATTTTCCTGGTATTTTCCGGCAATTTTACTTGGGGTCATCTCTCATCAATTTTTTGCTATCTCTTACCGTTTCGCCTAAACAATTCCGGACACACAAAGATACAAAGTTACAAAGATACAAAGCCCG	2		TCGCACATGTACCAGGCCACATCAGACTGGGAGCTGGACTACACAGACAAAGGCAGCCCCATGCAGATGGCAGCCTACTTTGCCGAGACCCGCTTCAACCACGTCACCAACCGCACTCATATTCCGATCCGGGAAGCCTACTCCATAATTGGTGAGTTAATTTTTACATTCTACTAACTGAAAAAAAAAAGTTATCATATTTGTGTTAATCACAATCGTGATATCACAACTACTCAAACTCGCCTTGCTAAATATTTGCTTAACTTGGGACTTGAACCACCGACCCTCCGATTACAAGTCCGCCGCCTTATCGATCAAGCTACTGAGGATCAAGCTACATTCTACTAACTTACAGCAATTGTAGAGTATCTAACAGCTTAATGTACTACTACCCTTTGT…	32759
	Scaffold_4	11025455	11027084	1629			>Scaffold_1:19052768	1		GGTTTCGCCAATGAATGCAGTGATATCTTGTTTGCGGCCAAGTTATCTTGGTACTAAACTATTTCTTTTATTAAAACCCGTTTTCTGAGTTCCTCATTTTGTATGTTTTTAACTGCAAACTATCCTCTCACTTAGCCAGTTTTATGCCATCGGTTGTATGGAATATTACCACTATATTTATAGGTACAGAATAATAATATAACCATCACAAGGAGCGAAACTGGCCAAGTTAGAGGATGGTTTGCAGTTAAAAACATACAAAATGAGGAACTCAGAAAACGGGTTTTAATAAAAGAAATAGTTTAGTACCAAGATAACTTGGCCGCAAACAAGATATCACTGCATTCATTGGCGAAACCTTTTTGGATAGGAGTTCTGGAACTTGGCCCTTTTTTTAAC…	32759
	Scaffold_12	16294608	16296237	1629			TTCGTCAAAAAAATACAAAGCAAGCAGTAAAACTTAACTTAGTTAGTTGGGAGAGGGGTAGAGAGGGAACTTTTTGAAGGATCAGGATAAAGTCTCCTACATTTACTCACAACTTGTGGGACAAACTGTTTCTGACATTCCTCTCTAGTTAGTAAGTCGCTGAAGTCACTCATCAACTTAACGCCTCTCTTGGCTGTGTCGTTTACAACTTTAAGGGATTGTACAATTTTAAGTGCTTTCTGATACTGAGGCTCACCATGACAAATTTAGGGGTCTCCCCTCAAAAAGTCAGTTTTTATGACAAATCGACTAAAGAAAAGAAATGTTTCG	2		GAACAGAAAAAATTGACAATACTAAAAAACAAATAATAGTTTTTGGCTATGTAGTTTTCCATCGTTTTCAGGAAGTAGACAGAGACTCATGGACACACTCAGTACCTAAGTAGGTACTCAGGAACAGCACATACTTTGAACTATCCCTTTATTATTACAGAGCCAAAATTTTATGGCTTTTAATAACCAATACCTATAGATGACTGTATAAATCTAGGTACATATTGTTTTTCCTAAAATTTCATTCCTTTTCTATCCAAAATGATGTAGGTAGTAACCAAAATCCAACAAAAATAGATTTTTTTTTTCCAAAATAAGGGGTACCTAGGTATTTGTAATCTCTATAATATTTATCCATTCAAATATTGAGGGACATACCTATGTATGTACCTTTTAAAC…	27510
	Scaffold_7	22208580	22210210	1630			>Scaffold_5:13570777	1		>Scaffold_1:28211706	20
	Scaffold_8	16652172	16653811	1639			GCTTATTTTATTTACAAATTAGTTAGCCTAAAAGTTCAAGTTTCAACATTCGTAAATTTGTTCTTTCGCGCTGTGGTATTTATTCTTCTCAGCCTATTTCTCCAAGTGATGCAAAAATCTTGGGGTAATATTTATGTTTGGTCAATATCATCTCATACTTATTAAATAAAAATTCAATCATCCGGATAGGAGTCGATCCTCATTCTCTTATTTACCAGTCTTGGGCCCTAGACCGTGGCAACATGGCCATACTGAGTATAGATAGTTGATTTGAGAATACCCTTCCTCATTGAAGAATTAAAAAAAAAAAAAAAACAAAACAAATTTACTGT	2		TTTAAATTTGAATAAAATTAATTTGTGCTAATTAGTGTTGAATTTCGGTGTTCAGAGTGCTTTATTTAAGCTATGGGCTGCTGATTTTGATCGGATTTGACCAACTTTAATCTCGCTGAACGCCAGGAAATCGTCTTATCAAATCACCTGAGAGGATTGACCACAAAGGTAAGAAGTCTTGGACCCTTGAAAAGTTCAATCCCATGTCTGCTAGGTACGTTCATTTTCTAAATCCCAGATTTCATCCAGGAAATAACTGTTGAGAAACACCAAACCCTCCTCAGGTTTTAGTATTAGGTATATTAAGAATCAAGACTTTATACCTAGTAAGGTTACAATGTTTTGGTTCAATGTTCTCCTCATCTCAGGAGCAATGTTATTGCTGTGTAAGCATCTTAA…	32759
	Scaffold_10	26761245	26762901	1656			>Scaffold_6:24301701	1		TGGGCCCATACTTAGTGCGAGTGTACTTTGACGTTACCCCTTCAACCCCCCTTCTTCTTCCCCTCTGGACAATAGAGAAGGTATTACGTGACATTGCAAAGTCACGAAAGCCGTCGAAATCTGTGCTTATATTGTTCTAAGAAGTCCGATTGTTCTGAAAGCCCACCGCCGCGCCGCGCCGTCCCCTGGACATGGGACAGGTGGACTTATGAAGGCTCCTCTCGGATCGGCTGTGGCGAATTTTCTTTTTAGGGCAAGTTTGGAAAGCTGCTTTTGCAGAACCATTTTGGGCAAAGTTTCCTTAGCAGAAAAGAAGTTTTGTTCAAGTTGGGAATTGAACCCGAGACTTTGAGGTAGAAGCGATTTCCTCTTATGATCCTTTTAAAGTCCTTGTAGTAA…	32759
	Scaffold_4	10380112	10381770	1658			GATATTATATGTTTCTTTTTATACTTGTGTTCTATGCCAGACAGAACTGACATTGCTAAATAAAACCACAAATTCACTTTTAGAAAGTTGGAATGGTAGGTATGAACCTTGAAAGACCAAAGTAGACCTTTTTGAAATAAACAAAACAGATCAGAGTCTCAAACTCACACAAGCTACAAAACTACTTATCAGACAGAACTTTAAATCTTGCAACATCTGAAATTCTGTTTCAATAAAACACTTAAGTGCTTTGAGCCATAGGTCTGAGCCTGTTTTGTGAGACCATCACCAATGAACGAAATAGAATAAAATGGGACCATTAGCTCTGATTTT	2		TTTCAAAAAATAATCGGGAACTGGAAGTGACGGACCCTTTCGATGCCTCCGGGTCCGGATGCTGTCGAAATCTGGAGCTGCTCTGAGGAATAGTTGGGCGGAATTTCGACGACCATGTGCGCTTTCTTTTTTGTTCTGTGGTTGTTGTTGTAACCAGCTGGCTACAGCTGTTTAGTGTTAAGCTCCTCTCTGCGGAGTTGGGTAAGTTGGGTTTAGAAGTAGTGTTTGGTTTGTTGAAAGATGTTATTGAATTTAATTGATTTAGGTATTGTAATTGAATTAAATCAAGTGAATATTTTTTTTTTTTTTTTTTTTTTTTTTTAACAAATTTGTCTTGAAAAACAACAACAATAACATTATCGCATTATTTATTCTGTCTAAATAGAACTAAGTAACTCG…	27851
	Scaffold_6	27989327	27991011	1684			>Scaffold_4:46224959	1		>Scaffold_3:15945913	20
	Scaffold_3	25058675	25060366	1691			GTCAACAAAAAGGTAAGAAAATTATATTTATTCTTTAATAATGCATATAAAAATAGTTTGTTCTTTCATATCTCAGCTCTAAAGTTTTCTTTTAATTCTGTGTAAAAATAGAAAATTATTTTTGTTCTTGCATATCACTTTGCCCAATTTGGGGATGACCTTAAAAACACTGTATTCTGAAGACTGTCCTGCAAGAAATGGTGAGCGCTGGATCATGTGTCTCATTTGTGAAAGGTGGGCACTGGGCACACTCACTATGTGCTGGAAAAGATGAGAAATTCATTTGTGAATATTGCAGTAAAGGAATGTTGGCCAAAAGTATTAAAAAATCAATGAAAA	2		AGATCCCATCCGACACCCTGGAGGAGTTCAAGTGATGTTTTTACCCTCTTTGGCGACCCTAGTGGTCGTCATCCTATCTCTTCTTCCCACCTCCACCCCGCAGGTAAGTTCCACCAACTAACAATATCATTTCTCTTAAGACTTTGCCTACCCTGGGACTCAGTTCCAACCCCCGAACACCAGCAAATGCTCGACACAAATCCAAGATAGGTTTTGAATTTGAAACCCATCCCATTCCTAGACTGGCTTAACGTTGCTTATCTTGATAGTCAGAACGAGAACTGGCCCTCATTCCAGAAATCACGCTCACTCTCATAATCCCCAAATCTCCTTTTCAACCATCACATATCGCACTCTAGTTGGTTATTACGTTCAAATTGCACAATCAAAGTGCGTTGT…	32759
	Scaffold_2	26829743	26831496	1753			>Scaffold_5:39900359	1		TTTATTAGCTTCTGCAACAGTTTACTTGACATTTTAAAACATTATCTCATGGACACTACTATGATTATTTTTTTTTACTTTTATAGCATGTATGTACATCTAGTTGCATTTATTTACAAGGAAAATTTCAATGAGAATCAAATATAAAATGAATTTAACTCTCTTTTGGGTGGTTCCGAATTTCTTCACTTGTTCAGGTTACAAATTATGAAGTTACAAAAAGTTTATAGCAATGGTGTGGAACATTTTTCTTGACTTACATCGAAGTGTGCGATTGCCATGTTCCATTGAGTATTCATTGTGACATCGAAACGATTACATGATTCGCCATTTGCTACAAGGTACGACATCAACATCACATTGATGACTGTCACTTTTATTGGTGTTTTGTTGTCTCGT…	32759
	Scaffold_13	850553	852336	1783			CCTTGAGTTCTCTTATATCCCGGTTCGACTGTATATCAATCAGTTTTATTGTAACTGGACAGACACTTTCGTGGTATTTGGTGCCCGTTTGGCCAAAAAGATGAAAATATTACATGAACCGGATATCGAACGTGGTTCTTCTAATAGCTGGGATACTCAAACATAGTACAGATAAGTGCATAAAATCATTTAATACATTGATAAGAAGAGAACGGAAAATGAACATTTTTGTATAATTATGTATTATAAAATATACTAGTGTGAGGAATCGAACCTGGGACTATTAAACGTTTTAAAAATGATGGGAAACTACGTGGAGGAAACATTGGAAATGAACTAGGT	2		ATAAAATGGTATCAAACAATTATTAAATTCTTGTAACCGCACAGTGAATTATATTATTATTTCGTTTATGCATTGCTAATTTAGCGTAGAAAGTACTTAACACGCTTGGTCATTTAATTTCAGCTAAATGTCCCCCGGGTCAGTACTCAGACACAGGACTTGCTCCCTGCTTCCCTTGTCCGGCCAACTTCTATCAGTCCATCTCCGGCCAGACCCAGTGCCTGCAGTGCCCGACCAACACCCGGACCAAGAACCCGGGCGCGGCCGGCAGGGAGGAGTGCCAGGCTATCCAGTGCACGGAGAGCTCCTGCCAGCATGGCGGACTCTGTGTGCCTGTTGGTGAGTTTCACATGACGTCAACCTATAGGTAGGGTGAAGCTAGACACACACGTACATGCA…	29868
	Scaffold_4	5266733	5268520	1787			>Scaffold_3:22750276	1		>Scaffold_10:14536288	21
	Scaffold_3	43941460	43943250	1790			AGGGAACCGGTGTATTTAACATGCCATCGACGCTGGCTTCCATTTTTATCAAGTATGCGGACATAGATTTGGTACTTTTAGTATGCGGACTTAGATTTGGTCAATTCGAAAGGTCTTCAATGATTCCCATATGTACTGGTGCTTTATCGAGTCAAATGTCTTGGAATAGTTGCAGAATGCAATGTATAGAGGAATGTTATTTCTAGTTATGACGGGTTTAAATCCATCCATTGATGTCAAACCATATCGTCAACAAGAACCCGGCGCGCGGCGTAAGCAGCAGGGCCTTGTGAAGATCTTAACTATTACTTATTGGATTATTTAATCAAATTCATTAGTTACAGTTG	2		ATATTTTCCGCGATCTTATTTATAGATATATTTTATTTTTAACCAATTACCTATTTTTGAATCAAATTTGTAAATTCATTTAACTTTTTGTGTCTTTTGGCAATCGTTTCGTTTTCAGTGTCTTTCTGTTTCGTGTAAGTGTGCAGTAATAGTAGCTTATTGGTATTCTTGTGGATAAATTTGGCGATTTTGGATACATTTAAAAGGTAAGAAAACACACCTAGCGGTGTCCTAATCATCTCTCCTAACTCGGTCTATATTTACCTTATTATTTTTAAGTCATTTAAGTATAATTTCGATTCTTTTTTTGGGGGGGAGGGAGATTGGTGGTCATCATAGATGGTAGATACTAAACTTGTTTACTTTAACTTTGAATAATGTTTCACTGAAATAACGAGT…	32759
	Scaffold_7	29127958	29129748	1790			>Scaffold_2:54631774	1		ACGTGTCTAAAAAAAGTAATGAGCAACAGTTATGTGCATGATTATAAACATGTCTTTGCATAATCTGTACACATAAATATTTATTACAGTGAATCATCGTTGACTTTTCCGTCGCGAAATATGCTAATAAATAATGCAATGCTTGATATCATCTTCAATCAAAGTGACGCTATGACGTACCGCGTATATTATCTTCAAAACTAACATTAGCGAACACAAAAACACAAAGTCAGCATCATGAACTACAACATCAATATCATCGCCATTACCATCACCACAACTAAAGATCACCATCCTCATGACCATCTTCAACAACGAAATCCTCATTATCATTATTGTTATCATCATAGTGGTCATATTCACATCATCATCATCATCATCCAACTAGTCATACCACCA…	32759
	Scaffold_1	10791687	10793487	1800			CTTTCTTTACATATCTAATTAATCACTTTTTTGTATTCATTAAAAATTGGCGGTGGGAAAAGGACCTCTGCATGAGTGCAGAAAATAAATTCTGGAATGGAATAGATTCAAATGGTGAATATTAATGATCCTTATGGTGATAAAACTATAGCAGTAGACTGATTATCAAGTATCCATATCAGTAGGTGCAATACAAGTCTCTTCAGTTCTAAATCCCTCCTAACTTTTTTCACAATAATCTGACAATGACTAAATTAGTTCTATCAAGAATAGAAAAATAAATAAAAATCACAAAGCCTAAAGTTGAGTAAAACAAAATCACATGAGACAAGAATAGCTCATCACTGT	2		TAATTGCATGAAGTACAATAAAGCTAATGAAAAAGTTGACAAGTACCTATTCTAAAATTTGGTTGTCCAATTTTATGCACAAATTTAAATCACAAATATTATCCAGTAGGTATTATGTATAAACAATTCAGTTTTCTGAAATCCGTCTCAGAGAAATAACAATGCCTATACAAACATACGAGTACATACACCAAAAGAGGCAGTGTAATAAAAAAATAATAATAATAATGCTCTTTAGTGGAAAGTAACCACCAGGCGAGGTTAATGCTCACAGCATTTTTTACCACCTAACCCTCAGAGTCTTATTATTATGTGGTCACAAACTCAAATTAATGAGGACAAATTCATGCATTCGGTGAGATTCGAACCAACGGATCCCTACACTACCTGATTTACAAG…	31356
	Scaffold_9	26512190	26514001	1811			>Scaffold_5:34657281	1		>Scaffold_8:20587999	20
	Scaffold_3	46526679	46528498	1819			CTATTTTCCATGCGAGTTAATCTTACACTGCAAGTTTACAGCACATATTATTTAGGTGGGTAAGGATCATAGTCATTGAATTTTCATAGAAAAGTTTTAGGAGTTAAACTAGGAAATCCGATTATGTTTGAAGTAGTGTGAAAGATATTATGGCTTGGCTAAAATATTAAAATCTTGATTTTGATTTGGTATTTAAAAAAATAGTAACTAAAAAAGTCATTCCGGTTGGGCAATTAATTTTATCTTACAATTATTATAAAACTCAATTAAATTCAAAGATATAGGGATACGCCAACTCAATGTTAATTATAATTAGGTATATAAAAATTATTTACTGATTTAAAGAAGAG	2		GTAAAATCACAAAAAATATAAGTTAAAACACTTTAATAAGTAAAAGAGGAGACATAATATCAATATTTAAATTAGGTAGTACACAAAAGCAAGAGATCTAAATCTCGTAATAGTCATAATTCAATAAAACTGATATCATTGAATGAATTTCAAACGGTAAGACAGTTTACCTTACACAATATATCATAGATACACAGTTCGATGTACCATAGTTAGCCATACTAATATAAAATAGAAAACTAATAGAAGTACTAATAGAAATAAGGGAAACTAATAGAAGTACTAATAGAAATTAGGAAAGTAATAGAAGTACTATTAGAAATTCGGAATCTAATAGAACTACAAATATAACTTTTTGGAAACGAATAGAACTACTAATAATAGAACTTTGAGAAACTA…	32759
	Scaffold_13	20223034	20224885	1851			>Scaffold_12:3230356	1		ATTTACACTGACCATATGTACACCTCCTCCAGGGTATGATTAATAGAAGAAACCTCCCCCCTACCCTTTCAGTTCCTTTCACCCCCTCTTTCTATTATTATCTAAAGTGTTAAAAAATTGAAATGCCACGGCAGAGAAGGAGGAGGGGGGTTAATACGAATAATATTTCACGAATGAGCCCCTTCGCCTCTTTGGTAACAGTGTCCGGTCACTCTAACTTTAAGATTTTAGAGAGAAATTTCATTAATGTACGCAATCAGATTTTTTTATATCATATTATTGTGTTAATCACTTTCTTGATATTAACATATTTGCTTTAATTGGCTTCACTAAAATAATATTTAATTTTGTTGAACTTGGGACTTAAACCATCGATCGAACTCTAGTTTAAAGGTCTTA…	32759
	Scaffold_9	13114502	13116360	1858			GTGCGTTGACTACATCAGTTCTCATTCAGTCAGTCAAGTTAAGCAACGACCACTGATCGTTGCCCACTCTACAACTACCCCAATTGTCCTCACGAGGCTAGGCGCGAAGCCCCGACATCGAAAGTACAGAGCCGACAAAAATTTCGATCCCGCCGGGATTCGAACCCGGGTCACCGGGTTTTTGTCGGCTTTGTTCGAATTGGAGTGCTAGACGAGCATGCTACCGCTAGGTCAAGGTGACTACTTTCCTAACTTTAGGGTTGAATTATGAAACAGGATTAAATATTTAGAATTCGTTAATCCAAGCCACCATCACTTTTAACAGTTGATATAAATGCGCTGTGATTGGTTGAAAT	2		TCCATTTTACTCTTACGTTTTTAATTCAACAAAAATTGTTATACCTAGTGGCAAATTGAAATAAAAATTGAAATCGGAACATTTTTTTTAGAACGAATACTACACTTCCGATTTCTAATATTAGAAATTTACCGGAAGTAAAAAAATGTTGATCCTTAATTGTAATATTTAATTTCCTACTCAGAGTCAAATCAGACTGACAGGCACAAAACCAAAGTTACACAGGAGATTACGCCACTTTCAAATACACAGGAAGGTTGTCTGACTTGTTAAGTACATCTAAGATTTTTTTGTGTTGATATCAGTGCATTTTTCTCTTCCCTTCTCCTTCCTATTTTTACTTTACTTTTGCTATACCAACAATTGAGAGTATTTCTTCCTTCATCATTTAAAAAATTA…	31465
	Scaffold_4	33215820	33217680	1860			>Scaffold_11:28106335	1		>Scaffold_4:21889228	20
	Scaffold_3	50652368	50654230	1862			CGTTTATCAAACACTCTACTTTTGCAAAACCTATTTGAGGCCGGTGTTTATTTGATGAAGTCTTTATCTCCACTTGTTTCTATCTGATAGATGTATCAGTTACTTTTATCTACCACCTGATTTTATCAATGTAATTTTTATATATTTTAACTTTTTCTTTATTGTACCATAGCACCCATACAAAAATGTATAATTAAATGCTAAAATATAAATCAAAAAAATCTGGAGCGTCCTGCTTCTGCCAACCCTTCTCTCTCAAGTCTTCCACTCCTTTACCTCCAAGCTTGGGCCTCCCACTTTCTCTTATTGTCCCCTTCGTGTTTCAAATAAATGACGGAGGTAAAATCCCCTTCCTGC	2		GGACACTCATTTAATTCAATATTGATTTAAAAATAAGTAGACAATGTTTATCTTAAAATACACGAAAATGTAATAAAATATACAAAACAACATCAAAATGTATACTGTGCACCTTATGATTTATTATTCAGTATGGCTTAATACAAACACTATAAATATTTAACTGTTTTATATTTATTTAAGTAACCCGGTTTTATTAATTGATTATGTATTTTTAGTCAAGTTCTGTGAACCAAAATTGGAGAACGAAGACGTATATTTATATGGATGGAAAATTAAGGTGCGTAATGTACAAGTAAGATCAATCAAAAATGAGTAGAAAAGTTCAGAAAACCTATACCTACATAATTGGACAAAGGTTATTAAATTATAGTCACTCCACAGGTAAGATAGTAATGT…	32759
	Scaffold_2	11990165	11992041	1876			>Scaffold_2:8810458	1		TGCGTCACCAGGGTGAGGCAACTGAGGCAAGGACCGGATCCTTCAGGACGGGCGAGAAATTGCGTCAGCGGGAATTCCTGCTACTTGCCTGCTGTTGCGTCACCCATCCCTCACTACCCCAAGCATTTCCTAGTGGATGTGTCAAAAATCATAGGGCCATGATTTTTTAATCCAGTTTCGAAATCGGAAGCCAATAATAATTTAGCCCTTTAAAATTACCCAAAGTATTTATTTAAAAAATCAGAGTTTGTATAATACGATCCCTTCATAACATAACAATCATAACTCTGAATTGTTTTCTGAGCTCAGGAATATTAACACCTAGTGAGGGAGCTAGTGAATTCTATAGTGGGCCTTGTCAGCGGTCCAGAATTTAGGAATTAAATGAAAGGTATTTCT…	32759
	Scaffold_2	2097276	2099169	1893			AAAATTGACAGTTAATTCAAATTAGGTTACCCATTTTTCCCCCCTCTCAAGAAGATGAAACTTTGGTCGTCTACACACACGACCAGTATCAAACCAGTTAGTAACCCATTTGCAACTGTGACTCTTTCAAGTCGCATCATGTGTATGTAAATTGAACACAACAGACGAAGTAGTGACAAACTCCATTGTGTGGTTGCAAACTGGTTTGCAACCCGTCGTGTGTAGACGGCCTAACACATTTTGAAAAGATATTAATTTAATGTTTTAAATACTTCTGTACTATTGATAGTGGTTTCAGCAAGCAGGGTGCAATACTTCGATTTTATTGATTTTTTTTTTTTTAACTATGGGTTCTTTA	2		TTTTGGAGTAGCATCAGCAGAGTAACATTGAATTTTGGAGTATCATCAGCAGAGTAACATTGAATTTTGGAGTATCATCAGCAGAGTAACATTGAATTTTGGAGTATCATCAGCAGAGTAACATTGAATTTTGAGTAGCATCAGCAGAGTAACGTAGAATTTTGAGTAGCATCAGCAGAGTAACGTGGAATTTTGGAGTATCATCAGCAGAGTAACATTGAATTTTGGAGTACCATCAGCAGAGTAACATGGAATTTGGGAGTAGCATCAGAGTGACTTGTAATTTTGAGAAAACCTGAAAATAATTTTTAAGTACCTAATTATTGGACATGCCCGGAATATTTTACTTTTTGCTAACAAATTACCTATCCACTTTAAACTTAATACCTACCTCGACAT…	32759
	Scaffold_6	11161859	11163769	1910			>Scaffold_11:19612690	1		AACTGCAATAAATGTGCGACAAAGTGGCTTTTGTGTAATTTCTCCTTCATAAACAGTGTTTTCTCCTATTGATACTTGAACAGAGGAGAATGAGGTAGAACCTTGCTTCTTTTGGATATCACAGACAGAGGAGGATAACATTTCTTCTTTTAATGTTCCATGATCCCAACCAACTGAAAAAGAGTATAAAGACATAATTATGTACCTGATATCTACTTAGCTATTTTAGGATTTTGATTAAATGTCAACAGAAACTATTCCCAGCTTATTTTGGGGAGTGGGGGGTATTTTTGGCATTGGTCACTCTATGTTTATAATATGACAAGGGTAAAAGTCTGTATGGAATGTTCCTTGATCCTTACCCTGCATGGCACATATTTAACACATTGGGTGACTTGC…	1134
	Scaffold_9	25078494	25080427	1933			CCATGTAATAACAATTGGGAGAAAAGATGTAGGGATATTATTCATCTAGAAATATTTTTGAGGAGAGACAAACTAATGGTTATTGATGTAACAAAAACTATTTCAATAAGACGAAACAACAATAACTTCACTTTAAACTTGTTAAGAGTAGAAGTTATTGTTCTTTCCCTATCACAATACAACTTTACAAAGTTTCAATAAATATCCACTGATTCCAATATGTTTCAAATACTTCAAAAGCCAGTTGCGGTAGCACATTGACAAGGTCTTGATGAATTCTCATTGAGTGTTGAAGGTATGGACTGGCACATGTACCATCACTCTTAAAAAAAAAATGCTTTTTGTTATACCTGCCTTAA	2		>Scaffold_6:22377522	20
	Scaffold_13	874393	876328	1935			>Scaffold_2:16840513	1		CGCACTGCACCTTTTTTAGGGGTCTAACGGGTTAGTTTTATTTTGATATCTTTTAGTTTAGTGTGGTGTTTTTATTTTAAATTTCAAATGTTATCAGTTTATTATCATTTTAATATAATTTTTAATTGAAACATTAATTTATTAATCCAATGTGTTTGTATTATAAATTGTAAAGTCTCGTTTCGTTTATCAAATATTCGAAATTATGTCGGAAGTCCCAAACGCTGCTACGAGTCCCAAATTATCTACTACGGATAGAGTGATAAAAAGTAAGTACGGGAAGAACTTTACCCATATTTTCAAAAAAAAATTCAAAGTAGGTACATTGATTTTTCTTCAAAGTCGGCCATTTGCACAATTTTATGTAGAATTTGCCTCTAAATTTGGAAATAACCACTC…	32759
	Scaffold_4	8787927	8789868	1941			CAGGAATGTCAAAAATCGATTTTTTTTTTCTTCGTAGAATAAGAAGGAATGCACTCTTTTCTATCATCTCTGTAAATATGAAAGAGAAATACCCCTTAAAAGTATAATTTTTTTCGATTTTAGAGTGGGGGAAGCGGAAAAAAAATCTGATGTAAAACAAGGAATTTAACAAAATCACTGACCATTTTTGCTAGCGGTATTAGTACCTAGTTGTGAGAATCTTGTCGAATAACAAGGAATGTAAAATTTAATTTTATTATACTCATTAGCATCAGGAAAGCAAAAATAAGACAAATCTTATTTTGGCTTTCCTGAAAAGTCGATTTTTGACATTCCTGGTTCTTCTACTCACCCATTCAAT	2		CCATTAACTGTTTGTTCCTCTCTAGATTACTAAACCTCATTACATTCCAGTTTAATTACTCTGTCTCCCCCCCCACCTGAAATTTATTCATCATGCTTCTGTATATTAGGGGGGTTCTACGGTGCTTCTCAATTAACTGAGACAGATTTTATCTAGCTTTTATTCTTGCTTCAAATTCCGCCAGGTATCTCCGCCGGCGGAAAACAAAAAGTTCAACTCTAACGGCGGCTTTGCTCTGTTTTTATTCTGCAACTATTTATTTCAAATAACGAAAACTTGTATTTTAAACTTGAAAATACAAGTTATTTACCAGGGTAGTTCTAGTCCCCTTCGTCTGATTTCGATGAATTACACGTGTACAACTGTACATGGTGTAAAATACAAATCTTAATAATCATG…	32759
	Scaffold_9	9776217	9778171	1954			>Scaffold_12:20100422	1		TGTTCAGCCAAAATCTAATCAACCACAAGATATCAGATGCTTACTTAGACAAGGTAGAGAGAGGGAATACATTAATATCGCGTGGATTCCTTCTTATCTATCAAACTTGAAACCCATAAAAAGTTCAAAAGCTGATTAATAATGTTGTTGGCATAATGGAAATTTTTCTTTTGGGCTTATAGTCTAAATAAAACGCACTATTTATACCTACTATAGGTATTTCTTAGTATACACTCTACAATCTACATATTTGGTAAAGCTTTTCTTAAAATAGTTCTATATTTATTTTGAACTTTTAGGAAGAATAGATAGGTACTGTTTAAGCTTGTGCCAACTTTTCTGATTCACCTGGTTGGTGTAGGGGTATTTGCCCTTGTGTTCGAAAGCTATTCTTGTACA…	32759
	Scaffold_7	32080022	32081990	1968			CGTTTCCATGCAACTGGGGTTCATTTCCTCACTTCTTAATTCTACACGCTATGGTTTTAGTTTGCCCATTCTGCAGTATGCCTCCCTTTCTGATGGGCAAGAAGTGCCACAGTACTTCCTCATTAGGTGCTTGGTCTACAAGTATACCCTTTCCAACAACTGTAGAGACATTTTTATTGATTATTTTTTTGTTTTTCTGCATAGGATGCAATTACCTAACCCCTAAGCAAATCTTGAGCTAAAATAAAACAAGAAGACTCATATGGAAGTTGATATTTCACTAGCAAATCAATTAAAAATCATGTAAGACAACCAAATATGTGGAGGAGTATGTTGTTTGTGTTCCATTTTTGTTGTTGTTGT	2		ATTATGTCCTGGGAGTATTTTCTTTAAATTTCCTCGATAACCTAAAATCTTTCTCTGTATATTAAAATAATTCATTGCCATTCTGTAACTTCACTTGAGAAGAAGAGAAAATTCCACTACTTTTTACTCCAACATGAATTTTTCCATGTTAGAAAATTCTAATTAGAAAATACAGTTAATGATCATAATCAACCTGTAGAGTTCCGTTACAGATAAATATTGTTCTTGTACAGTGTGAAATACCTTAGTGGACTCACTATTTCCCCGTGTGAATTTTATCCCTTTAACTTTCCTGTGTGTATAAGAGCGAAATAAATAGACAAAAGAACTATCGACTTCTAGTTCAGTGCTTACATTTCCCCATTTAAAACAAGACTGAAAATTCTAGCCTTGCATCCA…	6590
	Scaffold_2	39343977	39345948	1971			>Scaffold_1:64981422	1		>Scaffold_5:19503456	20
	Scaffold_8	32929451	32931478	2027			GCCGGATATTTTTTTTTTTCTCTCTCTCTTTTTTTCACTTTTCAAAGTTCAAGTTGTATCAAAAATAATTATCGGATAATGCTGCTTCTAAAGTCGGCCTAGGGGTCCCCTCTTGAGACAATTGTAGTTGGTAAGTTGGTAAAATCTGTAGAAAACACATTGTCAATAATTCTGGAGTCAGTCCGATGGCGCTTTGAATGCAACGATTCTTGTAGGATCACCGACGTTAAGCAACGTCCAGCGAGGAGAAGACTTCTTGATGCTGGCATTCCGGCCTAACCCAGGCTGGGTGAGATAAATGTGTTTAGGAGGTTGGTGAGTTTCTTTGCGAATGGAATGTAATAACCCCGTTATGATATGACCATGCAG	2		GTGGGTTCAGTCACCGGCAGTCACGGGACGGTTTTTGAGATCGATCTAAAGTCAACCTGACGACTCATTTGGACAGTTGATGTAGTTTACTTAGGAGCTCAGGAGAGTGAGGACGCCGAGTCAGTCAAGTCCTGATTAGTGGTCTACTGGTGTGGCCATCCGCATATAAAAAACATAGTACATATTTAAATAAATAAAAAAAAAACTTAAAAAAAGTGATTTTTTTTCACTTCTTATTCTACTTTCCAAAGGTAGGTACCTACAGCGATTTTCTCCATAATCATCAATTAAAAAAACGAATAATAATTTTAACCAAATCAATTTTACAAAAACTTAACAATGATAGTTTATTCTTTTGTTTTTCTGAAAAATGCAGCAGAAAATTCAGTTGGTTTTTCT…	32759
	Scaffold_3	36430634	36432677	2043			>Scaffold_3:21104265	1		CCGGAATGATTTTTCTAAAGTTTTACTCTACGCTTATTTGTCTTGCATCACACAGACGATCTAAGAAATGGCATTATAAAATATTATTAATCTAGTGAAAGGAAGCTGGTATACATACCTTCTATTTCTATCATAAATAATTATGTGGTCATTGGTCTTTTGATAGGAGTAAGAGGAGTGATCCCACACATGTTTGAGCAGTTCAGAAAAAAAACTTCAATTTACCAAAATCTATCTTCAAATATGTAACGATTGCATCAATATAGGAAGGTCGTGCCGCCTGATTCTTAATCATTTATAAAAACAATAATTATTATTAGAAGAAAAAAAAAATGAGAAGAAAAATAATCCACCATTAACATCTTTATAATATTTTACTGTGTCTTTGGTATATAGATT…	32759
	Scaffold_3	16892522	16894595	2073			TTGAATGGGTGAGTAGAAGAACCAGGAATGTCAAAAATCAATTTTTTTTTCTTCGTAGAATATGAAGGAGTGTACTGTTTTCTATCATCTCTGTGAATATGAAGGAGAAATACCCCTTAAAAGTATATTTTTTTTCGATTTTAAAGTGGGGGAAGCGGAAAAAAAATCTGATGTAAAAGAAGGAATGTAACAAAATCACTGACAATTTTTGCTAGCGGTATTAGTACCTAGTTGTGAGAATCTTGTCGAATAACAACGAATGTAAAATTTAATTTTATTATACTCATTAGCATCAGGAAAGCAAAAATAAGACAAATCTTATTTTTGCTTTCCTGAAAAGTCGATTTTTGACATTCCTGGTTCTTCTACTCACCCATTCA	2		GTGCAGGAGGGGTTGAGAAAAGACAGTTTTAATAAACTAATAAAGAAAGATTCTCCCCCATCAAAGAAAGTAATCTAGATTATTAAAAAAAGATTCTTGAACACCTACAAAAAAACTTTCAACAGACCATTTTGTACTTCCTCTTTAGCAGTACCTCTAAATACCAATTCAAATTTTGATATGCTCTTGACGAATCCAACTACACGAAGTGTATTTTTTGGCGATTTCATCAACAATAATCGCATCTGTCATTTGCATCTCCTTGAAAAGTTAATAGGTATTACATACATACATACGACCCTGCTTGAGCGGGATAAGACAGAGTAAAAGAAGAAGAAGAAGAAGAAGACATACACCTATATAATAAATTTAAACCCTCGTGGTTGTAGTAACGGCCAC…	32759
	Scaffold_1	45985074	45987157	2083			>Scaffold_7:31030241	1		TGTTATTATGTCACAATTTTAGTAGCGCAGAATCATAGGACTTTACCACTTTAATTTACAATATCTTGTATTATTTTTTTGCCTAAGATTCTGCCACTGGTCGCTGCTTCACATTTAAAGCAGCTCCTCATTTTTCCTCACGAGGTATGAGTGGACCCCGAACATCCAAGTACAGAGCAGAAAAAATCTTCCCCCGCTGGGAATCGAACCCAGGTCACCATGTGTGCAATGCCTAGCGCGCGAACTCGCTCTGCCACAGTGACTGGTGAGTCCTACTTGGTCCTAAGTAAAATAAACTAATCGTCAGCTGGAAGGTGAAACTGACCATCTGCATTTGGACAATTTTTCAGGAGAACCGCGCAAAGTTTTGGCGTGGAGGGCCTTCCTGAAAAAACCTTC…	9978
	Scaffold_3	29111507	29113593	2086			GAGTGCTGGAACAGGGTCAGATAGCCAGGTTTCTCTTATGTCCAGGTTTCTCTTATATGCAGGTTCGACTATACAAACATAACTTATACATACATAGGTGTAGCGAGGGTCAAATAAAATAAGTAGATTGGTAAAGTGGAATAGTATAGACATTTGAGTTGACATTGCAGGAGCCTGGGCGTCCATATTATGCTTCCACCACCGTGAGAGAGGTCTCTGTCCTAGGGGTGGGTAAAGAACGCGAGAGTCGATTCAAATATTCGAATCTTCACAAAGAATCGGGGGGTGATTCGAATATCGAGATTTTCAAGAGTCGAATATTAAAATATTCATAGAATTCTTTGATATTCGATTCAAATATTCGAATCTTCACCGGGAATCGAGT	2		>Scaffold_9:20517333	20
	Scaffold_6	21645745	21647840	2095			>Scaffold_1:45482725	1		GAGGCACCACTTCTTCTACGGGGATGACTAGATTTCTGGGCGGAGTGACGGAGTAATGTCGCACTGATAGAACTGAAGCTCCAGAGTCCAGTGCACTCATTTCTGAAACCAGAGAGAAAGAAAAGATTTTATTAGTTGCTTTCAATTCGTCGGCTATTAACTCTTGCTGACCACCTAGTAGCTTGATGGTTAAGGCGACGGACTTGTAGATTTGAGGTCGGTGGTTCAAGTCCCAGTTTCAGCGTATATTTAGTAATGCGAGTATGAGTAGTTGTGATATCACAAAAATGATTAACACAAAATATATGATAACTTTTGAAAAAAAACAAAAATAAATTGTAGGCTAATGCAATCCTTGATAACAGAGAGAAAGAAGGAATGATTATAGGAGTTGCTTTT…	32759
	Scaffold_10	7662038	7664134	2096			ATCAGATTCTAAAGTAACAGTGTCCACCACAGCAGCGTTCATTAATTTGGACATATCAGTTCACACCACTGAGATCATATAACATAGAGGGAACCTTACCTATCTCGAGTTGAACAAATTTATGCGTCCAACTTTGAACAGCTGATGGTCCCTCTTTCAACAAATACCGGCTTCTGATTGGTTCAATTTATTTGAATTTTTTGTTCACCTCATGCAGTGGCGGGTATCTAAACATCCTTAATTTTCACGTCAGATACCAAATCTTATATTACTACATAATAAGTAGAAAATAAGGAAAGTAAAAGTGGCAGCAAAGAAAAAATTAACTGATAGGTATGTATGAATAAAGTTAAAATATTTTTTTTGAAGAATTAGGTAGTTTAGGTACC	2		TGGCGAAACCCAAACATATTAACCTTTTCATTCCCGTTGTGTCATTCTGTTCCCAGCACCGAAACCTAGGAGACGGCGAGAAAGCTCTTGACGAGATTGACGGCAGTGGCGCCGTCAGCGTTGTGAAGAAAGTCAACGAGAAGAAAGTGAAGAGCAGAGAGGAGAAAGAAGAAATACTCGAGACTGAACAGGTGGCCCATCTCGGCGACATTTCTGACGATGTAAGTAAATACGACCACACACGCTCATGCATGCATGAACAGGACTGACTGTCATGCATGCATGAGCTCGTGTGCCAGAAATCATTCACAAACACAAGCCATTCCTATTGTTTCCAATTTTTCGGGAACTTTCGAGTCAGTGGGATTCGATTTCATTTGACTATTTGATTATAAAATT…	32759
	Scaffold_6	5960430	5962546	2116			>Scaffold_9:12063668	1		TAAAAGTGGGTAAGATTTTTTTGTGATTCAACCTATATTCCCGAACGGACAGAAACATGGTTTCAAAAATTGAGTTTCAAGTAATTTAACGAACCAAGGCCTTTAGAAAATATTTGTTGTACTTCTTTTCCCAAACCTAGTTGGGGTCGACATTGTTCAACCTCATGATTGAGGTTGGTTGGTTGTGGCACATTTTTACGACTGGATGCCGTTCCTTATGCCAACGATTCTATTGATTTCACGTTCTGATTAGGACGGGGGTTTTACCCTTCAATTGCTGGGAATTGTACCAGCTCCCCGTAAAAACCTCACCCAGAACTGAGTAGCGTGGGTCACCTACCCTGGGTAGGTCAGAAGTGTTTTTTTTTTTTTTTTCTTCTTCTTTCATCTCGGTTTACA…	32759
	Scaffold_4	30543923	30546061	2138			GATACATATAAAATTAATATTAAAAAAAAACAATTTGACAGTGTATACAAAGAAAAGTACATAGAACCAAATTAAGTGGGTATTCGAAGTTGATTTGTTAATGCCTCAGGCATTCTCTGCCACTTAGTTAACCCACTTTTTTATCCCGAGGGAATACCAACCACTGGCGAAAAACATTAGTGACGACAATATTATATATTATAGTATGAAAGAGGAAAACAAGATGTAAAAATGTTTTCCTCATTTTCTAATCAGGAAAAAATCCTTGATCCTCAGAATTTGGATGAAGTTCAGTCTACAACATTTTACGTTTATCATGTATTTATTATTATGTCTTGTATTTATTACCTAATTCATGAAATAAACGACTCAAGAGTCAAAGATAATATTTTTA	2		AGGAAAATAGATGAGAAAAACGCAAGAAAGCATTGTCCGTTTTGAATGCACCTACACAAATTCCTCGAAAAGGAGCATCGTTATTCGAAGAGGGGTGCGTTCAAAGACATGTACTCGATTTTGTTTTTCTTATGAAATAATTTGAGTAGATTGAACAAGCCAGTGCTGCAGTGGATAATTTCTCGATTAGCTAATCGATTGAATGTATTAGTACTTACCTTCCATATAATTTTCATCGTTTGTACCCACGTGGTTACCCATTTACGAGGACTTTAGTTTTTGCGGTACATCAGAGAAAATATGCAATATCTCTGGAACCAAATGGGTACAAACTATGAAATTAGCCAATCGAAAGCCAATCGACGAAATAAGCCAATCGATTAACTTGAATAGTAATAC…	10464
	Scaffold_5	45978960	45981130	2170			>Scaffold_9:12230717	1		>Scaffold_6:6777465	19
	Scaffold_13	10276791	10278988	2197			GGAAATTTTATTTTTTCAATATTAAACTGTTTGCAAATGGCGTCCAACTTTGTGTATGCAGTAAAGTCTGGAAACCCCTGAATATCTTTTGAAAGGGCTTTCTCAGTTAATTTAAAATTGTGCACGATAAGTCGGGGTAATTAAACATTTCCAAAAATGTATCGCAAGGTGGGGTTTCGTATTTAAAAAAATTAAGTTGACCTCCCTGGCCCCAACATGGGGGCCAGTAAAAAAAATCGGTCCAATTCTAATATAAGGTCTGATTACCAAGGATTACCGTACACAATTTTAAATTTACTGAGAAAGTCCTTTCGAAAGATATTCAGGGGTTTCCAGAATTTAGTGCATATACAAAGTTGGAATAATATTTAAAAGATAAAATTTACACCAATGCATTTC…	2		GTTCTGATAAATTCTGTGGTTCAGGAAAAGCTTGAAACTGTCGACAATTAAAGTGACAACAGATTTAAAGAGCCATAACATGCTGAAACTTTCATTAATTTACTCAGTTTGTGACAATCAGAAAAAATCGGTATACCTAACTGACACTGATTCAAATAGAACATTGCTAGAGCCAAGAAATAAAATATCGAATCCAGGCCTTGCTCTGAAGAAGAAAAAAGAATTTTTCAGAAAAATATTTGTTACCTGGGTTATTTCATTTAATATTTGAGACCCAACTTAGTAGCTTAATTGATAAAGCGGTGAATTAGTAACCCGGACTTCAAGTCCCAGGTTCAGCAAAGATTTAGCAAAGGTAGTATGAGTAGTTGTAATATCACAAATGTGATTAACACAAAT…	32759
	Scaffold_8	17891541	17893791	2250			>Scaffold_1:46400973	1		GTTTGTTCTGTTTAAAAAAAGTAATCTTTGTTCGAGAGGTAGGATGGGTAACAGAAATTTTTGTTGTAGGTACATAGAATATTATTATCATAATAATAATAACACTCTTTAGTGGAAGATAACCACCAGGCGAGGTTATTGCTCAAAGCATTTTCTACCCGTTATCATATTAAATTTGTGTAAATCACTTTCGTTATATCACAACTACTCAAACTCGCTTTACTATAACTATGCTGAAAATGGGATTTTAACCACCGACCTCCTGGTTACAGGTCCGCCGCCTTATCGATCAAGCTACTGAGCTCGGTGCATTTTCTACCACCTAATACTCAGAGTCTAATTAGTATATGGTCACAAACTCAAATTAATGAGGAAAAATTCGTGCACTGGGTGGGATTC…	32759
	Scaffold_10	27500186	27502458	2272			CTGTCGGGCACTTCTCCTTATTAAGACCTCACGAGGTGTGAGGTCTTGATAAGGTGACTGCCACAAAACAGGCCAATAGTTTAGTCTCAGCATGGCATTGAAAATTTGAGTTATGAGCAGGATGCCTCTGTCTGGAAGCTCCTGGAGAATCTTCCCAGTAATCAAGTCATACCCTGGTGCTTTATTCTTTTTGATGTTTTTTAGTGGAAAGCTGATCTCTGATGGTGATATTGCTTTAATAGGCATAGCCATTTGACATGGGACATCAAAAAACTGTTTGTTCTGCCATATCAGCATCTTGAGTAGGTGGAAATGGTTGGAAGACTGTGAAGATAGCAGAGCACTTAGAAGGTGCTTCAGAAAAACTGGAGTGATATAAGTGTAAATCTTCTCCACCAC…	2		CTTATTTTTGTGATATAACATCTTAACCAAAAGGCCGAGAAGCGATTTGTGAGTAGTCACCGTTGCCCAATGATTTAGCGCTAGGCATTGCACGCATGGTGACCTTGGTTCGATCCCCAGCGGGGCAGGAATTTTTCTGCTCTGTGCTTCACCTGTGCTTTTTCTGCTTGTGCTTCACCACAATTTGAATTTCTAAGTCTATATGATATTTCCTGAAAACGAGCTAATCCCAGGCAGATAAAAGCTCATTCGGGAACATTCTGAATTTGTCCGAATCTCAGTTCCTACAAGATTTAGGGCGTAATTAATAGACAACATCAATAACTTAAGTCGTTGGTAAGTGTCGGTTTTCCCTATCTTACACAGTACGCAATCCGTGACTTAGCGCCACAGAGGTAT…	32759
	Scaffold_6	24007719	24010003	2284			>Scaffold_4:12574954	1		AGCTTTCCCTACACCCCGTAAGAGACTAATCTTAAGGTAAAATCTACATTGACATGCACAGATGCATGGGGTAATTGTAAAGCGAGGTTGCAGTCGGAACTCCATATGCATGCATTAACAACGTATTGATTGAATGTTTACATAGAGGTGACGAAAGCATGTGAAGAGACAGCGGAGGAATGCGGTCAAGGTCAAAGGGATTTATGTATCACTTCTATGTATAGTTTTGAATAAAAATCGATGAAAGAATTTTGAATGAAATGTTTGCTATTTCTATGTAGTCCCCCATTCCGTGGCATATGTATACACAGTATACAGCAGGTGGAAGTAAAATACATTAAACAGAATAAAAAGATCATTAAAAATGAAATTTTATAAACAAATTTGTGTCTGTAAGGG…	12003
	Scaffold_6	13601232	13603541	2309			AAAATAATGATTTTTAAATTCTGAATAAATTATAAATTTATTCAATAGAAACAGTATCACAATTTAAATCACCTAAGGGGGCAATCCTCCCAGAGAAATAACATAATTATAGCCACTCCTGAAAATGACCTCAAGCAGGGTCGCGTACAGGTTTGATGGGCTCCTAGGCTGACGTCCATTTCGAGGAATCCAATTTTCACCCTATGGGCCTCTCAGCCGGGCCCCGGGCCACCCCTGAGGAACCAGGGAATTTCGCCTCTGTTACTCACTAGTGGCTTTCTACCCTATGGGGAGGGGACCACCAGCTAACAAATTCCGCAGTTTGTACAGCTTAACTTTTAACCACAGGTGACCACAACATCACGTACAAAGCTATACATAATACACCCCATGAAAGAC…	2		>Scaffold_13:6712912	20
	Scaffold_9	4095455	4097780	2325			>Scaffold_5:8411732	1		TAGTTGAGGTTATTCAAAAACAAGCCAAACATGAATTTGAAACTCTGGTAAAAGAAGCTATAGAAAATTAAAATAACTTAACTAAACAGCTCATTGTAAGAATGTGATCAAGTTGTAGTATTTTGACAAATTCAATATGATCACATTAATAAAATAAAATACATTTTATACTTTTTGTATAGTAAAAACAAAATTAGATAACTTAAAATTTATTTTGAATTACATTAAAACAACCAAATAAAATTAAATGTTTGTCTGAGTAAATTGTTGGAGTATTTCAGATTATGATGTCATTAGTGATAAAATCAAATGTATATAATATAAAGCATTTAGGGTAGCATAATAAAAAACAGACTAAAAAAAATATATTTTAAAATAGTTATTACATTAAATAGGTTA…	32759
	Scaffold_1	38400701	38403045	2344			GTGAGGGACTTGGATCAGGGTCCTCCATTGATGGCATGATATCGCAATGCAAGCATAGAGCGGAGCAGGAGAGTCCTGCTTTCCTGCAGCCACAGTTTCCTGTACATTTGCAGGAAACGAGCTTCAGCAATTCGGGGGGAGCGGGGGCAGAGAGATTTAATATAGGTTCTAGACCTGTTTGAGTTTGCTTCCATCCCCATTCTTCAGGAGCTTTACTTACTCCCAACCATTGTTGCACTTGATGGTACAGGGTACACCCTGAGGGAGTGCACACGGTGTTAACGCAGCAATGTTGGAGTTGATTCTAAAGGCTACCTTGGTATAACATATGTATCGCAGATGGTTAAGTGAAGACGGACTTTTTCCACTGGACGCATACAAATGTATTAAGAAGCGTTC…	2		CACACCCGGAAAAAGTGGGGATTTTCACCCACAAAAACATATCTCTCTCATAGACAGTGCATCCGGAATCGTTACTTGAACATTAATGCAGATACACTGCTATTTGGGCTCAACTTGGGATAACGTCAAGGGTCCGACTGATCATACTTATATGGCGTCAAAATGTTGTATGGTACCATAGACGTATCGTAGGTTCCATGGCACGCATCAAACAGCCGAAATGCCAGACATGGTCAACAAATTTAAAGTTCCCTGGCAAGTTAAAATATTTATGTCCAATTGTTGAACATACAACGCCAGCACATTTTTGCCAAATTTTGTGGCATAGTGTGAGTTCAATTTTTATTTGTCCCCAGAGAAAAATTATGGCACTTGAGCCATATCGTGTTTGCTTATAGG…	32759
	Scaffold_12	21319969	21322325	2356			>Scaffold_10:29622954	1		ACACACACCAACAATTAAGTGTAATCACAGAACTAAAGAGTCAGTAACAGAAATGAACTGAAGAGACTGAATTAATGAAATACTGTGAGAGAGAGAGAGAAATATTTTATGTCGGGACACTGGCCACTACGCTAGGGATTTGAAGGTGCTCGTCAAAGAAAATGCAAGGCATGGCCGTACTGGTAGGCGAGGGGGGGGGGGGTTCCTGTTGGAGTGATGATTATTACTATAAACTAGTGGGAGTCCCACAAGAGAAGCCCCAATTTTCATAACGAACTCTATTAGATCTATTGTGACCTTGAGTGATGATAGTATTATTATTAAATGCTTTATTAGATATAAAAAGACGTACGTGTACACTGTACAGTATAAATAATTATTATAAAAATGTAAACAACA…	32759
	Scaffold_2	7368093	7370460	2367			TCAAAACATGTTTATATAATGAATATTTCTTTAAAGACAGGTCTGTAACTCTCCTTGCCCCAACATAATTTATATTACATAAAAAATGATTCATTCAGCAACAAAAAAATAAAAGATAAAAATTCCACCTTGAATACACCCAAATTCTGTAATATTGAGGAAGATCGACTTTTGAGAGTTGGATTGGCATCCATTCTCCGAGTGAAATATTTTTTTCTCTCACAAGAGGAGGTTTTGATATGATTACTCTCCGAACGTACTTTGGTAGTCTGTCTATTCATCTTTTGAATGTAGAGAGAACCCCATGGAATGATGACATAAATCTGTCATATATTATCCTATTTTTTGAGATGAGAAATATGTAATCCTGAACTGTTTGGGTAAAAATAACCATATTTT…	2		GCTTGTGTGTTGTAATTCACCTTCAGTCCTACATCTTCCTCTGGTTAATTATTATAGCACGCTCGTTTTGTTTTTCTTAGATTCGGAAAACAAGCGTTTTGCTTAGTTTTCATCATCCCATAAATAATAAGAAAACACTGAGGTGTAACCCATCTACTCGTTAAAAGGAGAACATGCACATTGTTGGTCGAGTGGTTCAGACGCAAGTCTGGTGATCCTGGTAGCGTGGGGATCCGTTGGTTCGAATCCTACCCATTGCATGAATTTTTCTTTATTTATTTGAGACTTTGACCACATAATAATGGATCCATAACAAGTGATGGAATAAGGAGACTCTTTAGTAATAATCGGCCTGCATTAATGAACATGAATGAATTATAAATTATATACGTAAATTTG…	17512
	Scaffold_6	23087081	23089480	2399			>Scaffold_11:10079925	1		>Scaffold_5:27422626	20
	Scaffold_1	35450514	35452918	2404			CCGCGATTGTGAGTTTATTGTTCGTTTACGAGTATAAGTAATATAGGCAAAATTGCTTCACTGGTTGAGGAGATATATCTCCTTTAAAATATGTCTCACTTATGCTGACTCACCCTGTATGTGTAGTTGACTCATACATTTCATTACACCGGCCAGTGTTTAATTTTAATGTGGGTTTTTAAATGAGCAGTTTGTTTTGAATTTTAGATCACAGTAAGTGCATGTGTATGGTTTTTCTCCTGTGTGCTTTCGAATATGTCTCTTCATAGACTCGCATAGAACAGTATGGTAGTCACAAATAAGGCACATAAATGTGAAGTCAACATTTGGTCGAGCCATCAATGGACACGTTCTGCTGTGCTCAAGTAAAGCTGGGAGTGTAACTTGATACAAACAATA…	2		AGATCAGGATGTTTAGAAAAGAAATCCTTTATGTCACTGAGAGACACTGTGAAATAGTCCATATGTTCTGAGTATGAGTTGGCGGACCTTTGAAGTCGTATTAATGGTGAATTTTGAAGGTAGTTAGATCTAACAAAGGGTGGACGAAAAGGAAGAACTTGACGAGTGCCAGCGTGGCCAGGAACATTAATATTGATGGAAGAAAGTAAATCTGGAGAATTGATTTTACAGTGTAGGATGCCATGGAGTGTGATGATATCATACATTGCCCTCCGTGTATGTAAAGGCAGAAGATTTAGTGCATTTTCAACGGTTGCATAGGATTCATCAGGAGTTCTCATTTTAATTGCCAAAGTTTTGAGTGCTCTATGTTGAATTTGTTCTATTCTTGCGGAGGTA…	32759
	Scaffold_4	5255923	5258369	2446			>Scaffold_11:12655927	1		TTATAATTACCACTGCCAGAAAATGAAGGAGTAGATTCGGGAACAAATTACCTACTTGCCACAAAATTCAGTACGTTAAGCTAGAGTCATCATGGATTTTTGATATTCTGGTAGGTAAGCCTAAAGCCAGCTTAACGCACCTGAATAATTCGCCAAAAAAGATATTGTATACTTGCGTCCTCGTTATAACCTTATAACGGAAGGTACCTTTCGACCAACCAATTGATTTTCAAATCCTTTTTAGTTTAAAAAAATACCATCAAGTCATAATAATATGTAAAGAAGCACAATCTTTTCATTTAGTGTTATCCTATTATTTTTTAATTTCAATTTTATGGGGCAACATTTTGTAAAGATAAAAAAATATATCCATTTTTTTCTCAAAACATCCATTCCCCC…	32759
	Scaffold_9	13029989	13032452	2463			TTTATTCCAAGGTCAACTTCACCACATTCGTAAAAGAAAAATGCGTGTTGGTGCTTTTTAATATAAACAATGGACTTAACCTATAAAATACTTCTTCCATTTTGGTTAACTTTGGAAGAGGAAAAATTTCCTCTTCCAAAAGAAAAATGACTTGATTCCAGTTTGGTTCATTTTATTCCCGTTTGGTTAACTGGTTAGAAAGAAAAATATGGCTTTTATGTTCAAAGTTCAAATTGCATTTAAAAAATAATAATAGTAAAATAAAATAAAATAGATTCATTATTGCATGGTTGGTCGTGTAATTAACTGATTAGGTATTCACATCACCATCATCATAATATATCGTGGCAATTCTAGAGATCATTTAATTTACTAAAGAGAAGTTAGTTACTCCGATAT…	2		CCACAGACGAGTACACCAAGATCACCACTCCCCGGCAGGACGTCCTCTTCAAGAAAGGATACTTTGCAAGGAGAAGGCATCAGCTAGCGACGGCCCCCCCTGTCTCAGATCCTTCGGCCGGGTACGAGGTGCCTACTGGAGGTGAGTGCCTCCTGCTCTTGTGGTTGGGTGGAAGTGGCAGAGAATGCCTAAGGCATTAACTTCGCCCCGGATTACAAAACAATTTTGTAATAAATAGTAATATTGATCTTTATTTCTTTTTGTACATACTTTTAATTCTTTTTAATTTATTGTTATATTTTTTGTTGTTGTTGATGATTGTTTTTTTAAAAAAGTGTAAATAAATAAAGAGCTCACAATAGCTCACATACATGAATGGATAATCCTACAGAAAGCTAT…	32759
	Scaffold_3	26139399	26141866	2467			>Scaffold_2:48210687	1		CGACTGCAGACTGAGCAAGGTACAAGTGTTGAGTCATAACTTCCTGGGTGTTGGTTTCAGGCGGTGGTGGAGTTCCAGTCTTGACATCTCTCCCTGAGTCTTCTCCCTGTGATAGTTCCAGCTTCAAGAAACGCAAGAGACGCAAGAAGAGAAAACGAGAGGGGGTAAGTGCCTTGGAAAAAGATGATCACAGCCAGCCAATAGGTATTCTAATAATAATGTGCGCGAAATAAGATTATAATTGATTTATACATCTTAAATAACACAAAAGTTCATTTTCACCCTAGTCGTTTTCTTATTTTATTATTGGTAATGATTTTTTCTTTGGTTGTATTCCAGGTGGCAGAGGAAGAATATGAATCCAGCTCTGAAGATCAGTGCAGTCAGTCAGGTGCCAGC…	18749
	Scaffold_1	36322863	36325330	2467			GGCGTACTAAGAACGGATTTTTTGAAGGAAACAGGGGTTCTCAACTTATGGCCAAAAATTAACATTTATTCATAATCAACGCAGAGTCTAAACGGTTGGGCCGATTGACTTGAAATTTTGCAGGAAACTTCCCCTTATGATGTAGGAGCGTACTAAGAACGGATTTTTTGAAGGAAACAGGGGTTCTCAACTTATGGTCCAAATTAGTCATTTTTAGAGTGTTGTCAGATTCTCAAAAGGGCTGAGCTGAATGACTTGAAATTAGGCAGAAAACTTCTTTCAGTGATGAAGAAGCTTACTATGAAAGGGTTTTTCAAAGATAACAGGGGTCCTCAACTTATGGACAAAAGTAGACATTTTAGCGTCTTGCAAGATTCTCAAAACGGTTGAGCCGAATGA…	2		>Scaffold_10:22159902	21
	Scaffold_3	48660051	48662581	2530			>Scaffold_12:5077731	1		CCTTCGTCCATCATGGCGACGCTTCTGCTATCCTGCCTCACTTTCACGGCTCACTCCCTCCCCAACTATTGCTCCGTGGACAGTTACGAAAGTTCCCGCCGTTCCTCGTACCTCCAGTTCACCAAGGAGCTTTCGGCAGAGGAGTTCAGCGTGCGCGGGAAATTCAAAAGTCTCCATTGCTGCTCCAAGGGCTACAAGAGCATAGAATGGTAAGTGGTGACAGCTGTCGTGTGGGCCGTCCCTGAAGGGCCTCGTCTTACAGTAGGATCACTGTGGGCCGAATTATGGTAGTCAAGTGGTTGATGCGCTAGTCTGGAAATCCAGGTAACGTAGGGATCAGGCACGGGTGGTGGGAAAATGTTTTGGGGGTGCTACCACATAAACCGGACTAAAATGTTA…	32759
	Scaffold_7	2831563	2834093	2530			AGGGAATATTTTTAAAAAGGTAATTATACTATACGAACCGACCTCAGTAGCTTGATCGATAAGGTGGCTGACTTGACACCTCGAGGTCGGTGGTTCAAGTCCCAAGTTCTTCAAAGATTTAGTAAAGATTTAATGACACCCGGAGGTCGGTGGTTTAAGTACCGGTTTCAGCGTGGATTTAGTTTAGCAAGTTAGATGAGTAGTTGATTTGATATCACGAAAGTGATCAACACACAGATATGATAACTTTAAAAACTTTCATTGTATTCCACCGGAACCGCTTTCGCATCACACCAGCTCTTGTTCTACCTCTAAAGTTCAGTAACGTTCAGCTAGGTTAGGACTTGGATGGGTTACCATTCACATTCTAACCCTCGTGATGCCGGCTATATCTGGCCC…	2		GGCAGACTTATTGTAACATAGAGATTGGTGATTCAAGTCCCAAGTTCATCAGCAAAAATTTAGTAAGAACTTTGAGTAAGTTTGAGTACCTAGTCGTGACATCACGAATGTGATTAACACAAATATGAGAATTTTAACTTTTCGAAAAAATTGTAAGCCTATTATTCTCAGCATCTCAGCCTCATATAAGCTTTAGGGAATAAGAAATATACCTACCATTCCAATATAACGATTTAGGTAATATAATTTTTTCCATTTTTTGAATGGCAGAGGGTTAGGTGGTAGACAATGCTTTAAGCAATAACCTCGCCTGGTGGTTACCTTCCATTAAGAGTGATATTATCATGGTTGTAAAGCTGTAAAGGTATAAAGCGCCCTGACCCTGAAGTAATGCGAAAG…	32759
	Scaffold_6	17225625	17228166	2541			>Scaffold_4:2718660	1		CTGGCTGAGTGGAGAACTACTAATCAAGAGGTCTGGGTTCGAGTCTTGTTATGACAGATATTTTTAAACTTAAAGAGTATTGTTACAAGAATATAGTTATCAAACATAGGAAACTTTTAGGCAACATAGAAATATACCGACCTGTAGAAGTATTCTCCCACGCCATTTGTGTTTTGATAAAATATCTTACAAATCTTTATTTCATAATTATTTACATGAATTCAATTCCGATGAGTTTTACAAGAAAAAACACCAGTCGGGTGGTTACTTCTAGCGCTAAGCATAGTTTTTTCATGGAGTATTAACAGTATAAATATGTGGGATGATTTGAAGCCAAGAAAATATTTTGGGGATGATATAAAATGATAAAATTTAGGAAACACTTGAAAAGTCAGTGAA…	32759
	Scaffold_5	20714744	20717289	2545			GAATAAGCCATTAACCCGTTAGTTTATAATAATTATTATTTAGACTAATTGTTTATTATGTTTTATAATTTGGCCCTTAGTTATCAATATCCCATTAATTAAGGGCCGAATTATAGAACAGGATACTTGCTTGACATGTGGAAGATCCCGTGTTCGATCGCCAAAGCCGAAAAAAAATTGTATTCAATGTTTGGTTAGTTGTTTGTAGGAGAATACCTTCTGGAGTGCTTGTGTTGAGCCAGCACCAAAAGGGAATTATTCTGTCACTTCTTGCCTATCAGACCGTGGCATTCTACGGAATGGACAAGCTACAATGCAGACCACAAGCATCTACAGTAGCACTGCTGTTTATTGGCTACAAAATAAAAAAGGCGTGAAACTCTCACCTTTAAAATATGT…	2		CACTCAGAGTGCGTTGTGTGACGGTTGAAAAGGAGATTTGCGGAGTATGAGAGTGAGAGTACTTTCTAGAGCGAAGGCCATTAATTTTTTTAAACATCTTCCACTGTAACGGCGGGGTTGAAAAATGTTTATCTGATATTGAATTTTTATATCTCTTTTTAAAAGGGCGGAATTATAATAAATTTAAAAAAAATTAAATCTAATATTGAATTTTTTTTTAAATATCTCTTATTTTCTGTTTTAAAAATTCACGGATTTTATGGACTGTTTTTAATAGTCGAACTTGTTTTTCAATTGGTTATACATGAAACGATGTGAAATGATTTATGAAAATCCTACAAAAATGGTTTCTTTTTGTGTGTTTTTAATTGGACTATTTACTACCCTGTATTATATTAT…	19147
	Scaffold_2	3824327	3826897	2570			>Scaffold_11:17399809	1		>Scaffold_6:41159008	20
	Scaffold_10	11628563	11631138	2575			AGGTAAATATGTAGGTAGGTTCTTCTATCATAAACAATACTAATTAAATAACAAATATTTACCGATTGCCAACTCTTAATAGAAGTCTTGAAAAAAAATAAGATAATATTTTGTAAAATTAATAAACTCTTGCAGTCTTTATTATGTTTTATACTATTTTGATATAAACAAAAAGGTATTTAAAAAAACATTTTGTGTTAGTATGTTCAATGAGAAACGATTAGACGCGCACGATTAGCTCAGTGGTAAGCTAGTCCACCCGGTCCGAACGCCAGAGCCAGCAAAAAATTCATGACTACAAAATAAAAAAGACTGTTGCCATTTTTTATTTAGTCATAGTACACACTATGGATTCTCCTCACACAAATTTTTGAAACCAATGGTGACTTTAGTACCTTA…	2		GTGACACCGGACAGATAGCACAACAATTCGACGAAATTTTCGACACCTTTCGACGGCGATTTTGAGATTTTTTTCGTCATCCACTGCGAAGTTTGGTAAGTTATGTTTGATGTTTTTTTTTTTTGCTTTCTTGGTATTTCTTAATCTTTGCAAAGTTACTATATGGATTGTATAGTCGGTTTTCAGGTCAGGCTTCACAGCCGCAACCACAAAGCCAAGGAAGAAGTAAAATGAATATTTTTGCATGCTGCGAACATGTGCTAAATATGATTACGGACTGTCATGGTTTGATTTATTAATTCCAAAATACATTAAGATTGAAATTATTTTTTTACCGACGAATAATAAAACTTTGCGGTGAGCACTATACATTTTCCAGCTACGATCATTTTTAATGAG…	32759
	Scaffold_5	21249246	21251864	2618			>Scaffold_4:46943701	1		CATTTTATCCAGATTTAACTGTAATACATAGAAAGTCTATATCGACCCTTCAAAACTAGTATCTATGTTAAGTGTGAGTAATTTTTACTGACACAAAAATAAACAACAATAGATACATCAAAATACCTACATAACAAACTGAAAAATGGAAGCATAGCAGAAATCTTATACCTGCATAATGAAGCTCGGTAGCACTGCGCACCGCCAAGTAAAATAGTAAGAAGGGTCTAGCAAGATAGTATACGTCACAGCACTCACAACACAGATTAGCGATTTTCCGCATTTTTATCTGAAGTTAAAAGATAGTTAAAAATTAATCACTGGAAGGAGGCAAGCTTTCCAATGAAGATTATAAAAAGAATTATCAAAGTTGCTTGATATTTTGATTTTTAAAGATAA…	32759
	Scaffold_11	19241173	19243808	2635			TTTTTTACAAAAGTTAAACAATATTACATCATTCCTCTACTCGTCCGAATTCTCAATATTCTCAGTCTATTTTCGTACACAAAAATCACTGCAAAGTACTTACCAGGACTTATTCAAATCTTCAAGTAGACAACTTACAAGTGATCCTTGCATAAGGCGAATTATAAAACAGGATTAAATTTAAGTTCAGTCCGACTGTCCCTTAAGTCGGGCTATAGTGCCCTGTGATTGGTTGAAACTTGGCCTAGCATACTCGGCTTGCACTCCAGGTGACCCGGGTTCGAATCCAGGCGGGTTCGGAATATATTGGTTTCTGTACTTTGCATGTCGGGGCCCAACCTAGCCTCGCTGAGTGGGCAACGAGACCAGTGGTGGCATTGCAAGATTGTTGAATAATTG…	2		CACCTGATTTTATCAATGTAATTTTTATATCTTTTAACTCTCTCTTTATATCATGTACCTGTACCTAGCAGACATACAAAAATGTATATTAAATGCTATAATATAAATAAATAAATAAATAAAGACGTAATTATGCTACTACATATTGGTTATTAGAACCTAATCTTGCCTAATTGAAGATAATCTATACTTATAAAAGAGAGTTTCACTCACTGACTGACTCACTCACTGATCATCACTGTTTCTCCGAACTGATAAGTCCTAGGAAGCTGAATTTTGGTAGGTAGCTTTCACTTATAGTCTAGATGTGCAATAATAATAAATAAAAATATGATGAAAATACTCGTAGATATCAAGCAATACGGTAGTTTTTCAACGCAAAGAAAACAATAACTTAAA…	32759
	Scaffold_1	26464415	26467053	2638			>Scaffold_13:1941830	1		TTTTAATTAAAATTTTATTTTCAATTCAAAAATGCAATCCCTTTTTTTCTAGGTGGTACAGAAAAAAATAAAAAAATCAAAAGCCAACCAGCAAAGTCGGAATATTTGAAAAACACACGTTTTGGGCGCCATTTTGAAAACGACAAAAAATAAAGGAAAATGTCCGGGAATATTTTTGTTGGAAATGGTCTCTTTTATTACCCCTATCATTTTGGTGCAAACTTTCTGGACCACCCTGTATATAACATGATGATTATATGTAAGCATGACGTTCACAGGTAATAGTACAAACGTCATGGATACGTAGAAATTTCTGATGAAACTAAAAATCTTTTCATACTAAAAGTTAGTACTATCTGTAAATATGTGTGCATAGATTATGAATTATTTTGAACATTT…	21527
	Scaffold_3	52904927	52907571	2644			AAGGTTAGTATAAAAGCTTATATTTTCTGCTAACTTTATTTTTCCCTGCCTTGAAATTTTATATGTACTAAACAAAAAGACAATTTAAATTTTCTATTGGTGATTGAAGTAATTTAGTCATAGTTCAATGAAAAATGTAATGAATTACTAGTAAAATCATAGGAAAAGTCACGGCGGTTAAATTATTTGCTTTAAAAAACTTGACCTTTTTCTCAAACAGGAGCTTGCTTGTATCATTATAATGAAAGTGAATACAAGCATGTACGAGTCATTTTGAGTTAATGAACTATGATTAAAAATGTTAGTGAGGAGAAAGAGTGTGAGGTGTGCTCATTTTTAAAACAAAATTTATTTTTTGCAACCACCAATCTCAATAGATTAATTATCATTTCTATCTAA…	2		>Scaffold_2:13814657	20
	Scaffold_10	9292340	9295013	2673			>Scaffold_3:41365256	1		TGAATTCACATCAAATTGTAACAACAATACTTTATTTCTAAAATTATTTGGTTCGCTAGATTGTTCAAGAATAAAAACTACAAAATAAATAAATACAAAAGTAGCCTTAAACAAACAACACTGTGAGGAGGAATGGTATTTTCCGAAGCAAAAATCTAGTAGACTTTTGTGTCCCTTATAACCTTGGGGCTGTAAAAAACCAGGGGGTGTCATACTTATTTTGTTACTTTCTTTTTTGTTCTAAAGTTTTGACGGACTGTTCCACCCACAATGGTTCTTTCAGACGAGGGGTACAAACATGCTTCGGGTACCTTAAGGGATCCGATATACTTTTGAAACCCACTGAGTAGTCAGCCTTGGAAAATCCCAATCCCTCCTGGAGTACCTATTCATAAATAA…	32759
	Scaffold_13	13856160	13858847	2687			GTAAAACCTCCCTTAACGGACACCTCCGAATAGCGGACACCTCCCAATAGCGGACAATTTTCAGGGAACCGGGACATTTTTCATCTGTTATTATATGAAAACCTCCGAATAGCGGACCCTCCTAATAGCGGACACTATTTCCCTATAGCTAGAATACAAAATTGAAGATTTCGAAGGAGGAAATGATAAAAGAAATTACATTTGTACTTTTACATTATGTATTTTAAACCCTTGTTTAAAACATTACATATTGCGTTTTTTATGACCGTTTTCTTTTTTGTTGCATCTAACTTTATGTACATATTGTACATACATACATAAATAAAACGTCTTTGACGACCACCTCTTCCCCCAACGCTTATTTTCCAACCCCTCCATGGGATCTGATTCTACCTCCGA…	2		TGTTGGAGTTTTCTTACAAGCTTCATTTGTCTGTTTTCATCTCACGTGCTTTTCACTCCATTTTCCCAGACAGCTGATTAGTCTTCAGACGTCGGAAAGCTGAAAGAATTGTGTTTGATGGGCTGTGATGGAAAACCTTTTGTATTTTATAGACTGTCGAAATATTTTCCTCTTTGACTTTTTATACGACTTATCACTACCATTGACATAGAGTAAATATGAACTTAACGATAAATTAAATAAATCTCTTCTCTTTGCATTTTACACCCCATTTTGTAGAGCATCCTTTTACTATTTGCGGAGCATCCTTCATGATATCATTTCCTTCATAAGTGTCGTATCACTAAATCATGACTTTAGAATAGTCCCTTAATACATACTATACCTTATAGCACTGAA…	32759
	Scaffold_6	10214485	10217179	2694			>Scaffold_1:25207245	1		GAATTCCACGGTTCACGTCCACCATTGAAAATTTGCAACTTGGCTGTTGCTAACGTTGAACCTGTCTCACTATTCTCTAACCTTTCACAAGATTGCTATCCTATAGTTACAAAAAGCAGGAGACAATCAGACGAAGACAAACAATTTATCCACACCGAAGTAGAACGCATGCTACAAGATGGAATCATTGAACGAAGCAACTCATCCTGGCGCGCTCAAGCATTCGTTGTACGAGATGGAAGACATAAACCTCGTATGGTAATTGACTATTCTCAAACCATCAATAAGTTCACACATCTAGATGCGTATCCTTTGCCGAGGATTGAAGATGTCATTGCTAAAGTCTCAACAAACCAAGTGTTCAGTGTGATTGACCTCAAGAGTGCGTATCACCAGATA…	32759
	Scaffold_10	8421148	8423862	2714			TTGGATGCAGTGCAATAAGATTGATGATTGATCTTATTTTGAAAAGAAGTCAAGATGAATTATTTCAGTTTTGTGGCATTTCAGTATTAACAAGACCCGTGTTGAATACTATGTAGAGTTTCCAATATATTTACAACTCGAAGAAAATTTGACTACCTACCTAATAAATATTCAATTTAATACTTGGGGAAATAGTGATATACATAAAAATATGCTCCCAAGTCCTCTCTCTTGTTTAATGTTTAATTGTGTTTATCTTTATACTACTTATGGCATATTGTCAAAATATTAAAAATTACCTCCCCAATCTATCTTTTTATATTTAATAATGTGTGTAACTGTCTTCATTTCATGACAATTTTTGAGTCAAAGGCATGCATTTACTAAAAATATCTCTCT…	2		GTCACCAGTGGCGGAATTCGACTCCTTTTTGGGGGATAAGGAAAGTCGTGTGATGTTTACACCAGATTTTTTATCCATGTGATACAGGGGATATCCCAGAGCGACACAGTATGTAATTTGTCTCCTGTTTTATAATTCGGTCCTAAATCTAAATATATTTTTCTAAACCAGCCGCATTTTCTTTACATTTTTCTCTCTTGACTCTTTCCAATAGGTTTGATTAACTCATAAATGCTCATCTGTTTCCCTTCTTTTGTTCTACTTACCTACTCACTTTTCGTTCCTCAAATACCTGAGTCACTCTTCTTCTCTTCTTCTTCTTCTTTTACTCTGTCTTATCCCGCTCAAGCAGCATCGACGTTGTTCAACCTCATGGTTGAGGTTGATTGGTTTTGGCAC…	30167
	Scaffold_2	49750716	49753435	2719			>Scaffold_9:12757561	1		>Scaffold_1:40865651	20
	Scaffold_7	24202884	24205622	2738			ATATACTAAAATGAGGAGTCTACTAAATGCAAAGAAAATACCAATTAGTTTAAGAATAAGGTTTGCCAAATGCTATGTATGGAGTATAGTTCTATATGGATGTGAAAGCTGGGTAATAAGGAAAAAGGAAGAGAAATATTTAGAGAGTTTTGAAATGTGGTTGTGGAGGAGAATGGAAGGAATCAAATGGACAGAGAAAGTAAGAAATGAAGATGTCTTGAAAAGAGTAAGAGAAAAGAGGACTTTCCTAGATACCATCAAAAAACGTAAAAGAAATTGGTTAGGTCATATTCTTCGCAGAGATTGTCTACAGAGGAGAGTGATGGAGGGCAAGATAGATGGAAAAAGAGGAAGAGGTAGAGTAAAATTAGGTATGATAAGTGATATTAAAAGAGGAAG…	2		AAAAATTGTGATATAATAACACAAAGCAACTGATTAATGGTATTAAAGATTAAAACCGTACTTCATTGTTCATGAATTCTCCTGATTATAAATATACGATCACATCAGGTTAGTTTGAGTTTTCAAGTAACGAAGAGAAAAGCAGTCTGAATTATGACCAAGTACAATTTTTAAACAAGTTCTGGTTCATGGATTCAGAATTTAAGCGCTGTGATGGATTCGATTGCCACTGGTGAAAATCTGTTTAGATTTATGTTAAAGAAATGGAAGAAGAGAACGACTAACCCGGGAAATGTCTTAAAACTACATTTACTCTGACTTTTCTACAGATCGATCGGCTTTTTGTTTGCGGAATGTTGAATTCCGTTAGTAACATCAATTTCTTTGTAGAAAGAAGTA…	32759
	Scaffold_4	30868926	30871684	2758			>Scaffold_10:1449394	1		CACGGGGAGGAGAGTTTCTTCTTCTTCAATGACATCCTCGATGGATTCATCAATCACACCACTGTAATGACGGAGGTGGATAACCAGATTTCACGTCGCTTCATAAACCTTTGGACCACATTTGCAAGAACTGGGTAAGTCTAGAATGACGATGACAAAGAGTCTCTGTTGTTGATTGAAACATGTATATACGAGATTTTGCAAATCTTGCCGGCTGAACAGTTCCCCTGTTTGACCTTGCGGATCCAGCTTTTGTAGGAAAGCTCAAAATTTACCTGCTTTTAGCTTGGATTTTGTTTTATTATTATTCCTTACTTTCTTACTTAGTTCGCATTTGAATCACAAGAGGAACATTCCTAAGTTCATAGGTTCATCTATCAATGAGCCATTGTGTCAAAA…	32759
	Scaffold_10	29536119	29538880	2761			TTTAAGCTTAATAAGCTCAACGGGAGAGAGGGAAGTGGTGCTGATTGTTTGTCCCCTTTAATATTGAAAAAATGTTGCTCGGCGATCTCGCGACCTTTGACCCTTCTATTTAACACGTCTCTACGCTCAGGCATCTTCCCCGACAGGTGGAAGACAGCTCATATAACCCCAATTCATAAATCAGGTGAAAAATCGAACATAAAAAATTACCGGCCTGTGTCCATAATCTCAATTATTCCCAAAATCTTGGAAAGTTTAGTTTATGATAAAATCAATGAACCTCTTTGTTATCTAGTTAACAACCATCAACATGGTTTTTTGAAAAATCGATCTACGTCAACTAACCTGGTATCTTTCTCTCATTTTATTTCATCTAACATAGAATCCAAAGGTCAAGTT…	2		AAATAATCGTAACATGCACAGTGCACACACTGCACACATTCGTACGAGTATGTGCATGTTATTGTGTACTGTGCGATTTCAAATATTAAACGCAAGTACATCATATAATAATGGTGTCATCATCAATCTATATCAGCAAATCAGCATATTGAAGTAATAAATCAGCAGATTTGTCGCCACAGATAGATCAGCATTTGTGAAGGGTAGGAGATAGTAAACTATCTTCATTTAATATTCCATGCGTTGAGTCTAGAGAAAATAGCTGGAGCTTTTGCTGTTCCACACTGTTACTGTTATGTCATGTGCTGGGTATAATATTATCTACTGGATTAGTCATGTGACTTATGTGTTTATGAGACTTATGACTGATCATCCCTCTCAGCTGACATCTAGCTTTCA…	32759
	Scaffold_6	7397824	7400587	2763			>Scaffold_4:5266105	1		TAAAAAGCTACTAATGTCGGATAAAAATCCTTGCTATTTCAAAGAATTTCAATTGGATGCTGCAAGTATTGAAGGGTCTTTCCCTCACCCAATGATTTTTAATGAAATTTATAATCTGTGATGTGAAATGTTTTCTTAATAAAAATGTATTTGTTCTAATGTCGGTTTTTTTCCCAAAATATATTGAAAAATACCCATGCTATAGTTGAATTATTCTGAAGTGACCACTTGTCTTAACAAGAAACAGCAGAGGAAAAACAGCGGGTACACTAAAAAAAAAAAAAAAAAAAAAAAAACATCCACCAATAAAACCTTCTTGAGTAAAAAAAAAAGAAAGAAAAATACAGAAAAATAAGGGCCTTGTAAAGCTCAAGTGGTTTCTTTTTGATGAAGAGTCAA…	31902
	Scaffold_12	207050	209817	2767			AAAAAAAAACCAACTGTCCTATTTATTCTTTCTCCTTGAAAAAGGTCTTCGATATTTTTTCTCTTTAGTCATTAACATGGGAGACTCTGAAATCTCTTATAACCTAGAAAGAACATTAATACAGTCAAAAGTGATGAATATAAGAGAAGTTGATAGGAATCTGAATATAAGATAACGATTTACAGATAAAATTTATCTCTGTATAAGGGAAAATAATCTGTATAAGGCAGATAAAAGCTATACCTACGAAATTCCCTTAAACCTTACTCCTGTTGAAAGAAAGAAATCAAATTAATTTGCAGGTAATATACTCAACATGCAGGTGTTGTAAATTAAAAGGACTTCGACCAAAAACAGTATGATATTCCCAAGAATGATGACAATTTTGACATAATGACA…	2		>Scaffold_5:16328156	20
	Scaffold_2	9039686	9042464	2778			>Scaffold_9:11930878	1		CTCCTACAGGCAAACTCCGCCCCCAAAAAGTCGTCGGAAAATTCGAAAAATGTAGACCACGAGGCTAAAACAACAAGAAGAAATTCAGTTACGTTTCGACTTCCCAGTCTCAACTAGCGTGTCGAACTTGCGTCGAAATATTTCTCCTCGAGCGACTTTTCTGAGAACTGCGAACTTATTTTACGTCCGGGTTTAAAATTTTGAATTTTAAAACTTGTATTTTTAAAACATAAACGAATATTTTTTGACTTTTTTAATTTTAGAAACACCTTATTTAGTGATTTTAGATAATTATTTAGTGAAGTTTAGTTTGAAAGAAGCTGAAGGTTAGACCTTTCTGAAAGACATTGGCGTTTCTGATTTGTGTAAGTATTGCTGTTTAAAAAAATAATATTATTT…	32759
	Scaffold_5	38148093	38150873	2780			TTTTCTTTTTAATTAATTATAATTTGACTCTGATATTTAAGAAAATCCGAAATTTTGGACAATAAAGTCAAAAAATAAGAATCACGACTTGCCGATACAGAATTTTTTGTAGAATCTAGAATGTAAAAAAAACGGTTTTCTATCATATAAAACAAATTTGAAGAAAATCGGTTCAGCCGTTTCGGAGATACAAGTAATTTAGTAAGGTACCCGGCCCATTTATCGCCACCTTAAGCTTCTTTCATTTTTGAAATTTTTTGTGTTGTAGTTTTTTCTGTAAGAATTAAAGTAACACCTAGAATATTTAGTTGTTTCTTAAATCGAAATATTATTTAAAGCAAAATTAATCCTGAAACCGAAGGAAACATTTTTTCTCAGACCTCCAACTTTGGCGATATT…	2		AAGGTGAGGTAATGAGTTCTCTCCCGTTGACCTTTTCTTACCCGAATTCTCTCCGGCTTGTTGCAGGGGTCACCACGAGTATCTCTACCGGAAATAAGACCATGCTTTTTTACATTAGGCATTTTAGAAAATGAAAATTATAAAATTATCATTTTTATATAAGAATCGGTCTTTAATAAGGAAATCTTTTAAATCTCTAACTAATGAAAGGCAATGCCTTCAGTGTATAGTAGGTAAAATACATAGAAGGCCATGCCTCAGGAAGATAGTAGGGTTAGGGATAATATATAGAAGGCAATGCCTCGGGTTTATAGTAGGGTTAGGTAAATATATAGGCCATGCCTTGGGTTTATCATAGGGTTAGGAAAAATACATAGAAGGCCATGCCTCAGGTCTATA…	32759
	Scaffold_7	36170924	36173727	2803			>Scaffold_11:23449967	1		CATTGTATTTTACTGTATATTTTACTTTGTCTTAATATAATAATAATAGTGTTTTTTTTTTTTAAATTATATTAGCTTTATAAATACACAGTTCTTGTTCCAGCGAGGTGAAGACTTCGTGATGCCGGCATTCCGGCCCAACCCAGGCTGGGTGACTTTAATGTGGGTAGCAGGTTTGAAAATTTCCTGCGAATGGAGGGTAACACCCCCGTCGACTTATGACCATGCAGTTGAAAGCGACGCTAAACCCAATTAAAAAAATAAAATTATATCTATCGAGTTATATTTTATTCCTTTTGTGGACCCCAACAGAAATTCCAATAAAAATCACTTCGTTTTTTGACATTGCATGTCTATGGTCTAGTCACCTAGTCAATCCAAAGGCACTCCAGAATAAAT…	32759
	Scaffold_3	26017546	26020363	2817			AGATGATTTATTTCATCAACGTTAAATTTTAGTCAATGATAAACTTTCTATGTTTCATATCATTACGGTGGTGACTAGTCAGAGATTGATCATCCTGTTGTAACTGATAGACGCACCCTTAGGACCAAATTATAGAACAGAATTAAAGTTAAGATAAGCCAGACCCTCCCTCAAATTTCAACCAATCACAGCGCTCTATAGCCCGAGTTAAGGGATAGTGTCCACTTAGCCTCAAAATAATAATAATACTCTTTAGTGTGTTGTAACCACCAGGCGAGGTTAATACTCAAAGCATTTTCTACCACCTAACTCTCAGAGTCTCATTAATGGCATTATCACCACCCTTGATCAGGCTTTGTTTATATTTATTTCTAAATTGTTACCATGTTCATTGTATAT…	2		GAAAACTATTAGGTAACTAGGGCACAAGAAACTATTAGGTTTAATTAGTAAAAATAGCTCCCCTAGGCTAAATTAAAAAAAAAAATGCAACAGAACTTTCAATCCACATTAGCCTTTGGATTTTCTGTGCCCACTATAAGAAGTGTATTGTTCCAAGAGGGCTTGGCGTGTAGAAGGGAAATATCATTAAGAAATGTTTCAGGTTTAGAATAAATATTAATCAGATCTCCACCTGCCTAATTTAATACGCTGTGCTTTCCACGGGCAAAGTTATGAGGTATGTGTAGGCACATGACGGCAATGTATACCACCGGCGAGGCGGTTATTTTTTTATGTAGACAAGTGTACACTCTAAAGGATTCAACAGAACTTTATAATTAAAAAAGCCCCTGTGATTAG…	32759
	Scaffold_7	30756227	30759054	2827			>Scaffold_2:55599160	1		GAGAAGGCTGTGTTTTATTTTATTTAAATATTATTAAACCATAAGAAATAATCTTAACTACTAAGACATTT	71
	Scaffold_1	36396196	36399052	2856			CAGTGTAGAACTCTAGACGTTGGTAAAAAAAACCATTGCTTAGCTTCGGTTTTCCCTATCTTATACAGTAAGCAATCCGAGACTTAGCGCCACAGAGTATTACTAAAACGTCTATTAATTCCGCCCTTAAAGTCTCGCATGTCCTTATGATGGTTGGTCTTATAGACCAATGTATTCTGTGCACTAGTACAAGCCGTGTTTAATTCCAACGAGAGACCCAGATATCACAAAAAACATGAAAATGTACTTGTACAAAGTAAGAGAATAATAATGATCAAAAATGACAAAAATACCAAAATAAATTATGTACATAATGATTAATTGACATTATCTGCCACTTTATACAACAACAGCAACACGGGAATGCCAAGTTGTACATAATATATAAGGAATTTTAGG…	2		>Scaffold_3:19780699	20
	Scaffold_5	5375225	5378127	2902			>Scaffold_11:15105295	1		ACCACATCGATCTCTCGTCCCGAGACGGCTACGATCTCAGCCGTTTCCTGCTTGAGCAAAACGAGGACTCTCTGATGATGAAGGCCACAGATCCGTTGTTGGAGATGAGCGGGACGGTCCTGCCGGATCTGAACGCAAGCGGTCGCCTGGGGGGAACACTGGACCTCCTGCCGGCCCTGACGCTCAACACGACGGGACCAGAGCTCCTGTACCGGCACTCCCCTGGGGTGACCATCGCCTTCATCATAGGCTACCTGGCCGTGTTCCTCATAGGCCTGGTGGGCAACTCCCTGGTCATTGCCGTCGTGATCCGCTCGCCCCGGATGCGCAACGTTACCAACTACTTCATCGTGAACCTTGCCGTCGCGGACATGCTGGTCATCACCTTGTGCTTGCCGG…	32759
	Scaffold_10	11276436	11279362	2926			ATTTTTGTCGGCGCGGGGGTTCGAACCCGGGACCTTCCGCATGGCAAGCGAGTGCTTAACCACTGTCTGTCCCGGTAGCTCAGTGGTATGAATCCAGAGGCTTACTGCTGGAATATGGGACTTAATAGTCCTAAACGGGCAGTCTAAATAAGGCGATATTATTATTATTATTCTGTTAGGAAATAATAAATGGCGGTAAATCTGATCTCATCAAAAGCAATCAATTTGATGGTTAAACTAGCTCTTACCGTTCTCGAGATATCGTGTTCACACACAGACGGACGCAAGGACCAATGGCCGAAAACAATTTTTTGGTATCCTGAGGCTATGATTCGTCCAGAAATGTGAAAAAACTGGGTAGGTCAAATTTTCCGACGAATTCAATACTTCCCTTATTAT…	2		TAAAAAATTCGCAATGAATGAAAATATGAGATCGGTATAGTTTCATAATAATTAATAAAATATCAGTGTCTCGATTTCGACAGACATATCTTTATAGGTAGGTATCACACATTTGTAAAATAATCTCGTCATTTCTAAGTAATCAAACTATCAATCTTGTGGAACGAGGTAGGTAGTGAAGGTTTTATTATTAATTTGGATTGTGATAATAGTTTAATCACTCATAATACATAATGACATAACACACGAAGTTTTTTTACACATGCATTTCTAGAGGAGACTGCACTTGCACTTTTACCTGAATAAATGGTAAAGAAAGACGTTTCTCTCAAAATAATATTTTATTTAACTACCCTCGAGTGATACGTAATGTATACGTATTAGGTTAATAGGGAAAAA…	32759
	Scaffold_6	19885399	19888385	2986			>Scaffold_3:17464520	1		TGGTGTGTGTCGAGATTGAATAACCCAGGGAGATTGATTGCGAATTTTACACATACAGCAAAACGTAGGAAAGAAAAATAAAATAAGAAAGGTAAACGAAAAATAGCGTTTGGCATAAGAATCATGTCGAAGATTCATTCAAGTCATCATCAGCATCATCATAGGGTTATCAGTTTGCAGTAGTCCTCCATTCTTCTCTATCTTGTGCAAATCTTTTCAGATTTTTATATCCTAAGGTTTTAATAAGTTGGTTGCAATATTTTAAGGGAGATCTTCCTCTTTTACATTTTTACTTTCCTTATCCTATACTAAGGAAAGTATTTTTACCAATCCCTTCTTCTAGTAGGTGATGTAGTATGCTTTCATGTCGCAATGTGTGTCCAATCATGATCATTTTTC…	32759
	Scaffold_13	18425849	18428882	3033			ATACAGGGTGCGGCGCGGGAATGTCCCTTTTTGAATATTCGATTAAAAAAAGGCTGTCAGTCTTACCTGATACTTATTGTTGAATTATCATCTAGAAATATGTAAGTTTTGATTTTATCTAGGTTTGAAGAGTACACCATTCAAATGACGACCGTCATTGTCGATACACTGCTGAAGGCGATTTCTAAAGTTTCGCTCTACTTTTTCCAACATTGCGACAGGTATACGGCCTATTTCACGGCAAATGTTGTGTTTTAACTCTTAAAGTGTTCTTGGACGATCATTGTAAACTTTCGATTTGAGGTAACCCCACAAGAAAAAATCACATGGAGCTAAATCCGGGGATCGCGACGAAACTCCCGCTACACTGCTACGATACACTTATTTTTCGAAAAATAA…	2		AGACAGTCCAAAAATTCCGACTACTCTGGGATTCGAACCCAGGTCACCGTACGTGCAAGCCTAGCGCTGTACCCTCTCGACTAAGGTGGCTACAGATTCTCCTATCTTTCACTATGGTTTGTTACCAACTATTGAATACTTAATACCTATAGATAGAAGGAAGGCTAGAGGGAGGAGTCCGTTACCCATCGAATTCATTTCTGATGAAATAAAAAGAAATCTTGCACAATTACTTGGTCACTACTCGTGGAAAAAAGTGTCATTCAAAGATCCTACATCGTTGTTTAAGAAGTACCTAGAAAATTTCTCTTTTGATTTTAATGTCTTGGTGTCCTGTCGATTTGGTATAAGCCAAGTAGGTGACAAAAAATCTTTGATTTTTTTTATAAAGTTTTTTTT…	32759
	Scaffold_5	41850064	41853138	3074			>Scaffold_9:16849295	1		GAGCAGCAAAGATTTAGTAAAGTGGCAACACTTTTAGTTTACAAAACTCGTGCCACATGTAAATCTGTACATTTCACCTATCTCATAAAGTACGTTCTATTCCAAAGTTATAGTTACAAAAATATTAGGTATATTAGCTTTGTCAGTTTAAGTTAAGGGAAAATTTTAAATACTATTGCAGGCGTGTTGAAAATGTGGGGAGGAGGGATGAATCCCGGGGGAAAACAATTTTTTTTGGAAATTTGAAACGTTCATAATGGCGTAAATCGACAGATCCCTACATTTTTTTAATTTCATAAAAATTCTAGAGCAAATGCTAAAAATAACCATCCTCACTCAATTCAAGGAATTTTGACTTCAATAAAATAATATGGCAAAATATAGCCTCATACTTCTTGC…	5555
	Scaffold_2	10375760	10378838	3078			CTACCGAGGTCGGTTTGAGTCAGAAATTACAATTCCCTACTAGACTTTAAGTCCACAGACGTTTAAAAAAACAAAGTGCTAGTTTCTTGTGTTATTAAGTCACAAATTTTAAAGGATAGCATCGAGATTACGAGAACTAATGCATCATTAATCCAGCAATGCCACCACTGATCGTTGCCTACTCTACAACTAAACCAATTGTCCTCACGAGGCTAGGGTAGGTCCCGATATCCATATACAGAGCCGAAAAAAATCCGACCCCACGGGAATTCGAACCCAGGTCACCTGGAGTGCTACCGCTAGTCCAAGGTGACCACAGAGGTATAACAAAAATGTCTATTAATTTTGCCCCAAGTAAACATCATACATGTATGTATGTATAATTGTATATGTATATCG…	2		>Scaffold_9:15155483	20
	Scaffold_2	55634772	55637857	3085			>Scaffold_13:4154801	1		TTCAGTATCTACATTAAATTCAAAGATTTTTTTTTTAATATTCATGAAAATCATCAATTGTACCAAACATGGAGAAGTTAAAAGCCCAAGGAAATCTATGGCAATTAATGGAGTTGAAAATTATAATGATGAACCATCATTTATCTTTAAGTACAAAATAGTATTTAAAAAGAAAGAAAAAAAAGTAATTAATTGTGTCAGGAATCATTTTTGCATTACTTCAGGGCACTGTACCTTTACCACCCATGCCATTCTGGAAAAAGAAAAACTTGGTGAGAATTTTCTGCTTCGGCCGGCATTCAAATCAGCAACCTCCAGGACAGTAACCAATGCTCTTAACCACTGAGTCATGGAGGTTGGCAAAATAGTATTACTAGAATTTTCACAGCATATTGTGAT…	32759
	Scaffold_3	36524312	36527424	3112			AAAAAAAATACATATTCCAAAGATTGCTGATGTTTGTGTCAATGAGTGTTCAAAAATAAAATTATCTCTACAGTTCAAAAAAGGTTACATAAAGAAAACATTATTTTCTAAAAGAAAGGATGTTTAATGTAGAAATAAAATTATGGTCTCTTTTTGAGTTGAAAAAAAAAACACTATTCAAAATTAATGTAGAACACCCACATCACGCTATACTATTAAGTAAATAATATGTACTTTAGTTGTCAAATTTAATTAAGATAAGTAATAATACTACTAAGAAAAGATACACACTCAAAGATAGCTAGATTTTTGTATCTTATTGAACCATTAAATCATATGAAAGAAGATCCGTCCCTTTATTTTTAATGTAATAAGGGTAAAGTAATGATAACTTTGTTT…	2		CGAGAAGTTACACAGTATTTCCCGTTTCGGTGCTGGGTCTGCTGGGTCAATATGAGCTATCCCTTAGAAACAACTGTAACAGAATTTTATAATTTTGTCGGCTCTGGGTTTGAACCCAAGACCTTCCGCTTGACAAGCGATTATCTTATCGCTATGCTAATCTTGCGCTCAAATCTCACCTGATTTGGAGTCTATTGCATTGCCTATACGAGTAGATTATAGATTGAAACTTTTTATATGCAAGTTGTAAAACACTTTTCAATCATAATAAAGTCGTGCTATTTACAGTAGTAAAATATGAAGCTTTATGAGTTTTCTAAACTCAGAAAACTTTAAAGTCAAAGGATTTATTGATTATTTTAGTAAAACTATTCCTAGGTCTCCATAACATTGTAACTG…	32759
	Scaffold_3	36867811	36870925	3114			>Scaffold_1:56467577	1		AGACGTACGGTTTTTATCTTCAAGGATAGGTTTTATATTTGATGTAATCCTCTTGCATAATGCAAACCTTAGTTTGACCAAAAATTCCTGCTGAATAATTTATTCTTTCTTTGACCCGTCGAGTCGACTCTAAAAATATCTCAAGAAAGTCTTGTTTGAGATATTTTTCACATCCTGTAGATTTACAGTACACCGTTGTGATGCCCCGGTATCTCCAAGACATAAACACCCTGTAGATTCACAGTAAACCGGTATGATCCCTCGGTATCTCCAAGACATAAACACCCTGTAGATTCACAGTACACTAGTGTGACCCCCCCTGTAACTCCAAGACATAAACACCCTGTAGATTCACAGTACACCGGTGTGATCCCCCGGTATCTCCAAGACATAAACACC…	32759
	Scaffold_13	20132061	20135181	3120			TTTTTTCAGCTCTGTACTTTGGATGGCGGGACCTACCCTAGCTTCGTGAGGACGATTGAGGTAGTTAAACAGTGGGTAACGACCATTTGCGGCATTAGGAAAGTGATATTGGAATTTGATGGTTGGTTGAAGATATGATGCATTAGCATTAGTTCTCGTGATGTCGATGCGATCCACTGACATTGTGACTCTATCTTTTTAATAATTTTGTGGGTAGTGCAGCAATACAAATAGCCTCCATAACTTTTTTACATCCATCGCATTTTATTTTCACTCTAATAATGTAATACCGTCTGGTCGTTACGCCTACAAGGAATGACTCATTTTTCCTCGCGAGTTATGAGTGTACCGCAGACATCCAAAGTACAGAGTAGAAATGTTTCTACCCAGACGGGATTC…	2		GGATGCCCGGCAGGTAAAATCCTCTCTCCCACTCCCAACATCAACATTTAAACTAACACGCTATGGAATTTGCGTGTCAATGCTGAGATTAGGAAGAATATTGTCGTAGTGACGACAGAAGACAGTTTGGGGATGGTGTACAGCATTCATAGAGTGTAGAGGTGTACCCTCTCAGGATGATGCAAACCGACCCACTAAAAACCCCATCATCCATCCTATGCGAAAGAGACTGCCCCGGTGTGCCCCGGCACCATATAAGACATTACTTCAGGGTAGGATTTAATTTTATTGGGGTCTGCCTACGAGTACTTGGGAAACCCAATCAGAATTAGAATAGCACTTATTAGACATTCGTATAGAGAGCCCCATTATGTATGCCAGCAGCTTAAAAAGACCTTA…	32759
	Scaffold_3	1935544	1938732	3188			>Scaffold_5:40803378	1		GACGTTTTTGTAATACCTCTGTGGCGTTAAGTCACGAATTGCGTACTGTGTAAGATACGGAAAACCGGCGCTTAGCAATGACATGAGATAGAGAATTTGTCTATTAATTTCGCCCTTAGTTTAAAAAATTCTCTATTTTTCTTGCACTTTTTTCGGACCCAATTCAATGCCTTATTTTACAAAATCAAAGCCTTACTTCTTCAATTAAAGTAAAAAACTCTTTTATTGCATCCACTTTACTCCATAAATGAATATTTAAAAAATCTACCATAATTAAAACAATATTTTCTATGCCTTACAGGTAATCACTGTCTGAATTTATTGTGAATAACAGTATCACATTATAGTTTTGTGGGAATACATGGGATTAAAAACCAGTTAATCCCGTTTTTCATGACG…	8409
	Scaffold_8	454999	458202	3203			CCTCATTCTACAGACGTGTAAAGTTGTGTCCCTACGAAGAAAAAAAAATCTCCGTCATGAATGTTACCCCCAAAAAAATGTAAACCATTTTGAAAAACCCTTTGGATGAGAAGCTAGCAGCTGCCGCCATTTTGCTTCTTAAAGATGACATTGTTATTATTTTGAAATTTCCTGTCAGTTGGATGTTGGATGCAGTACAGTGAGGGACAATGGTGGGTCTAATTTTTTTTGACAAGAACGTTACGCGGTTTTTAAAATAAATTGTAATGATTCTTTAATATATAATGTATTTCTTTAATTCTTCTGCATGTCCTCTTTCCAATCAAATATTTTTTTTTGTAAAGTGAATATTCTTTTATTGAGAAAAGATTGTTCTAGTGGCGTGTTACTCATGAACGT…	2		>Scaffold_4:41916753	20
	Scaffold_2	26324690	26327917	3227			>Scaffold_11:22889839	1		CATCTCCCTGGACAGGTACTGGGCCATCACAGACCCCCTCACCTACCCCTCCCGCATGTCCACTCGGAAGGCATACATCTGGATTGCCATCGTGTGGGTATGCTCCGGCGGCATCTCCTTCCCTGCTATTCTGTGGTGGCGGGCCGTGCGCAATGAGGAGGTGCCCAAGAACAAATGCCCCTTCACTGACAGCAAAGGCTATTTGATATTCTCGTCGACAATCTCGTTCTACCTTCCTCTTCTTGTGATGGTGTTTACTTATTTCAAAATCTATCGGGCAGCCGTTGTGCAGACGAAGAGCTTGAAGGTGGGAACAAAGCAAGTGCTGTCAGGCTCCACCAGTGGGGAGAAGGAGCTGACGCTGAGGATACACAGGGGCGGCACCGAGCACCGGCACAT…	32759
	Scaffold_2	53311042	53314284	3242			TAGATTATCAAGTCTGTGAATTTTTTTCAAATGGTAACCAACTTGTCTCAGGTGAAGATCTGAGGAAAACCATTCTTACAGCAACAAATCTACCTTGTGAAGATATTTCCATCACTATAAATGGAAAACGATTGGTACAAAAAGCCTTGTACATTGCTGGAGTTGTCAGACTGTCACCAACTGTTTTGGGAGGTAAAGGTGGTTTTGGATCAATGTTGCGTGCAATTGGAGCTCAAATTGAGAAGACAACAAATCGTGAAGCATGCCGGGATCTGAGTGGTAGAAGACTTCGTGACATAAATGAAGAGAAACGTCTGAAAACCTGGTTGTCTCAAGAGAAAGAACGGGAACAAGATAAGGAGGACAAGAAAAGGCAGAGAATTGAACGGCTTCTGCAAG…	2		ATTCACTTGTGCCAGGTTTTATTACCATATACTTTATTGCATCTTCTCTCCTCAAACATGGACTTTACGACTCTTCAGGAAAGTTAAAAAGTAGTAAAAAATAATCTTCTTTCTAGACCGAGGATTGTGAATAAGATTAAGAATAAGATAGTGAGAGAAAAGAGGAATGAGAAAAATAAAACGGAAAGTTGGAGATGAAACACATAAAAAAACTATGGGTAGGTGAGATAGGAGGAAAAGCAAGTGGGAGACACGAGAGTAGAGGAAGAGAACATTTCTGAAGACTTTAAGCAAAAGGACTTTTCAAACAGTTGTTCGGATTTAGTTCATTAAGACCAAAGTAACCGTGGCAGTATCAGAAGTGTTTCCTAACAAGGCTGCCTAACCGCAGGACTCCGG…	32759
	Scaffold_1	17261674	17264918	3244			>Scaffold_10:17022709	1		GAAACCTTTTTTTAGACCGGAGCCAATTATTCGGGTATAATGTATTCAAATGGAGTGAAGACAGGAATTCTCTGGACTTTTGGGCACTAAACCAACGCTAGACAAGATTATAGGGATTTGACTAGACCAACACTAGACAAGGTTATAGGGATTTGACTAGACCAACACTAGACAAGGTTATAGGGATTTGATTAGACCAACACTTGACAAGGTTATTGGGATTTGGTCTGGGTTTAGATCCATATTGGATATAGCAGTGAATAACTATCCGAGGACTTTTCAGGTTCCACAGGGTTATAATATTATTATGTTGTCTTTATTCAAGTATTAGGTATTTTTATTCTTATAATAACCTAAAATAACTCCTCAGCCTTCAGTGTTTACTGGAAAACCCAACCT…	32759
	Scaffold_3	23496995	23500292	3297			AGGCAAGAGTTTCGGGCAGAAACTGCCTCTTTCACAATAGATATCTCACATACAATATATAAGTAAAACTATTAATAATCTCATAGGTTTAAGAAAAAAAAATAAAAGAAGCATAGTATATTTACAATTTGAAAAAATGCAGTGTCACAAAGTGTCATTCAAATAAATAAAATTTATCAAATTTGCAACGTTTCAATTATGTACAAAAGAAAATGCCGTAACTCAGTGGTCACGGTGTTGGTCTGGTAATCTTGAGATCACGGGTTCGAAACCCAGTCGGAAGATGACAAGTTATTCTCCCTTTTAATATTTTCACCATTTCACATGTCCTGAGCTTTACAGCAGGAATAATGGGACGATATTATTATTTATGTATTTGCATACTAAAAGATTACCAGA…	2		CTTCTCTTTTATTTTTCTTATCCGTATATCCTGATTTGTTTATCTTTGGAACCCCACGCCAAATCCTTCTACTTGACTTCTCCATTTTATATATCCTTTCTCTTGATTCGAAGGTGATGTAAAAAACTTGAAAAGTGAGAGGCTACAAGTAGCGGTTAGGCTTAAATTTCAAGAACAAAATTGTAAAGGCATCAGACAAGGAGTGAGATGAGGAAGAGAGAGGAAATATGGAAGGTAGGTGACAACAGGATCTGAGAAAAATGTTTTAATTAAAACTCTAGCCCTCTTTGTCTTCTTTTGCTTCTTCTTTCTCTCTCTCTCTCTCTCTCTTTCTCTCTCTCTCTCTCTTTCTCTCTCTCTCTCTCTCTCTCTCTCTTTGACTCCCTCTCTAAAAAGAGA…	32759
	Scaffold_4	901527	904838	3311			>Scaffold_6:19254598	1		AACATGAAATTTTACAAATTTAGACATCGCGCGCAAGCTTTATCTTGAAGATTCGCTAGTTCTAAGTTACCTAATGAATAAAATATGGGGTGATGTGCAACACATCTCCTATGATGATGTGTACAAAATTTTAATGAAATGCGTTCAGCATTTTTTGAAACTTGGGCGTTACAAGGAATAAAAAACAAACAGACACAAACTCTGTCGGAAATTACGAAATCTCCAGAAAAAAATATTTTACAAAACAATACGAACATACTCGGAAGAAATGGCAAGAACCTTGAGAGATAAAATATGGAGGAAAAAAGGTAAATAGATGTTTTAGCCATATGTCTTTTTATTTGGGAAATAAAATTAATGGTAATGTAGCAATAGAAGAAGGAAAAGTACATATCTGCA…	16722
	Scaffold_4	49454008	49457323	3315			CCAAATCACAATACCTATACATATGTGTACTGGGAAATAGAACTTTAAGACATATTATCTTGAAATAATAATGTTTAATAGGTTTTCAAATACAAAAAATCTGGACTTCAAAATGTTTTCAAAGAGGGTTTAAAACGACATCAAGTTTTTACCGGAATAATTTCTTATGGAAGTTATCTTCATTTGAATTGCAACATGTATGTGTGTTCACAGAAGAAAATGTGACTATGGCAAAGTAACAAGAAGTAAAATATATAATGAATGCTAAAGCCCACAAATAAATAGGCTCAGACAGTGAGCTATTTATGGTAACAATAATCACTTCATAAAGAATCCATGGGTCAATCAATATCTAATAATTCTAGGAAAATGTTCAACACAACTGTGCTATATAGAACA…	2		>Scaffold_7:12698705	20
	Scaffold_1	19441293	19444635	3342			>Scaffold_5:33043951	1		CGAATGTATTTTTTTTACAATAGATTTTTTTTTCTGAACTATTAGTTGGTATAATATGCAGAAAATGAGGTCTAGCTAGGTAGGTAGTATGGATAAATTTGGTAATATTGTTTTATAAAAAATGCTTATGTTCGCGAAGCTCTGCTGTAAAATCTGTACATGCCTTAGAAGATTTTTTTTCATGAAATGAAATACAATTTATATTTATTTTATTATGTTGCCGGGACATGACAAGTTGCCCTCCCCACTTGGGATTTTGACCACATAATAATACGTCTTAGGCTTACTGCTTTAATAATGGGACTCAGTCCTAATCGGGCAGTGTGAATAAGGCGATATTATTATTATTATGAATTTCGACAGCCAAACAATTTTAAAAGCTTATTGACTCATTCATTT…	32759
	Scaffold_1	38995397	38998743	3346			TGGAAATCATTCAGTCGTCGATAGCAGTTCAAGTTCATATCATCCAAGAACAGTACTCTCGCCCTGCAATCATGCACGGAAAAGTGGTCGCTCTAGTCGTGATTTTCGCTGCTGTGGCTTCAGCCCTGCCGGAGCCTCTGCCAGAGCCCCAACCCTTGCCGCAACCAAACCCCGAGCCACAGCCAGGCTACTACACGCCCTACTCCAGTGGGTACTACGACTACTACTACAACAACCCAGGCCTCGGCTCTTACTACTACAACAGCGGACTTTACCCCTACAGCGGCTTCGGGTACAACAGCTATGGTTTCAGTGGGTACCCCTATGCATACAACTATGACCCGGTCGTGCGCTCTCGTTACGGATACGTCGGATACTAGAACTCTTTCGACGACGTTT…	2		ACCTCACGATGGAAAGTCCTGGGTTCGGACCCCAGAGCCGACAATAAAAATATTTTCAAAATTTGATTACAGTTGTTTGTGAGTTTTGGTTACAGTTGTTTGATACCTACCTTTTGGGAGAACTCGTTTTGGCCCAGCACCTACATAAATTTCAAGTATTGCGTCACTTCTCGACCATCAGAGGGTAGACTAGTCATACTACTGGATGGAAAAGCTACAATACAGACCACAAGCGTCTACAGTAGCTGCTGTTTCATAGCTACGGAATAAAAAGATCAAGACACATGCAGATATACGATCCAGCCCCAAAACTGATTCAGTCGATTATTGTTCCGGTGAACTCATGACCATGACCCCTAGCCCTGCACTTACCTCAATAGCTCTTTATAATTTTTTGGC…	32759
	Scaffold_1	41045388	41048750	3362			>Scaffold_12:11299822	1		CCTCTTTACTTAACTTCTATTCTCTTTCTCTCTATCTCCCATTTTCATCATATCTCTCTCTATGTACTCTAACTGTTTCTCTCTATATCTCATCCTTTTCCTTTATCTACTTTTCCTACCTCATTCTATCGCTCTTACCATTCTGTCTCTGTGTACTCTACCCGCTCTGTCTATAACCCTTTCTCTCTCTCTCCTCTTCTCTTATTCCCTCTTTCCTCATCCCCCCTTCAATAAAAAATTAATGAGTTTATGTTGTCTGGCAGTCGAGTCGGGACAATAACATTAGTGTCCAAATTGTACGGACGGGGCCCGGACGCACACAAGGCGACAGATGTCCGCTCCATTAACATGTGTGTAGCACAGGTTAATGGAGCTGCTGTTAAACAAATTTGAAATGCA…	32759
	Scaffold_3	20257032	20260414	3382			TGCATGGTCATATCGCTACAGGGTCGCCATCGACGCTGGTTAAATCCGTCGAAACTGAAAAGACGGGAGCATATCTGGCTCAAATTGAGCACAGTGAATTGAGTTATGTATTTTTTTTTGTCGAAAGCACATGAAACTATGGGTGGAATTTACTATGGGTTTACGACATGCGCAGAAGCCACTAGAACCGATACGGCGCATGGAAGGCTTTTTCTCTCTACTGATTATTTGTCTATTCTCTTCTATCTGTTGCTATGGCAACAATCGTTGCTATGACAGCAAACGTTGCTAAGGCAACAAACGTTCCTATGACAGCAAACGTTGCCATGACAACAAACGTTGCTATGACAACAACAAACGCCAATCTTGTATCAAACCAAAGTGTGCCATTTCAAATTC…	2		GAAAATCTGCCCATAACACAGAGGCACAACAAAGGAAACTTTACGTCCTTGGCAGAACCTGTCGTAAAACTGTAAGAGCTCCCATAATGTGAACAAAACCTATATTTTGCTGGGGGTGGAGGGGAAGGGGGTGAGGGGTGTGGGAGGGGGTGGGTCTTATACTCTGTGTTATAAAAAAATATGAAGGGAAAGGAAAGGGTTATTGGTGGTCAAGTACAGGGTAGATCGCGGGAGACTGATGAATTATAAAACGAAAAAACAAAACTAACTGATGAAAAATTCTAAAACTTTTTATCTAGATTTATTTGGTTTTAAACAGCGTATCTGGAAAATGGGCTTTTTTCTCACATGTAGGTAAGCATTGAAAATTTAGATTTATTTGGTTTTGAACAGCGTGTC…	32759
	Scaffold_4	7580015	7583454	3439			>Scaffold_10:9319170	1		TTAACAACAGAAATCGTTAAACAACAATCCGAAATTATTATTGAACCCCAAGAATTTACCCGTCTCTGGCTAGATCTGAAAGGGGCTAGGGATAAGAAAGGAATAATTAAAAATTACAATTTCCCAAGTTCTGACTTACTAACAATATTTCAATCAATAACCAATAATCAAGAAGTACCAAAAAATTTCAGAAACCGAGCCAAAAAGATTGAAAGTCTGCTGATATTAGAAGAAGACAATACCCAAAATCTTGAAGAACTGCCCTTGGATGAAAGCACTGACTTTAGTGATTCGGGGTCAACGACCTCGCAACTCTAACCCTCCCCATCACTTACTCACTTAATTATTATTCCCCCTGTATAAAGAATCTAAGATACCTACACTGCTCTAGTAACATGT…	20745
	Scaffold_3	33037551	33041090	3539			CTTTTTCATAAACCTTTTTGGGCCGAATCGTAATGCGCCCCTTAAATTACAGGAAACCTGGAATTCCTGGAAAAAACAAAAATGTAAACCCTATATAGAATTTGTGGGAGTCCTGTGGGACCCAATCTTACCTCTGGATAGGTAGTAAGGTCTTATCAGAAACAGTGACTTTGTGATTGATTATAAATGTCTCTTATCACTAACCTGATAGTGTGATAGACTTAATGAGTCTTATCTGAGCCTAATCATACCCAGACCCACCTTAACAGAATGTTCTTTTGATAGTACTCATTATATAAAACAAATATTTATATTGTTGTACATGATACTATTGATATTAGTTATTGATTACATAGAAAAATGCATTACATACATACCACAATGATTGGTTCACTTGAT…	2		>Scaffold_6:36709336	20
	Scaffold_2	55879369	55882929	3560			>Scaffold_9:16158162	1		CTAAAGTTCTACACTTTACAATCTTTATTAAAATAGTTGCAAAAGTAAAGTTATTATTATTATTATTTTTTTAAAGTTCTCATTTTAATTTCTAATATGCTTCAGCTAGAACATTTTCCTGTGCCAACTCTGTTGAAGTCAAATGTATTAACAAAAATTACACGAAATACAATACTTTCCTTATTATAGGATAAGGAAAGTAAAGATTAAATACGAGATCTATTTAAAATTAAACTGTAAGTAGGTATCCCATAATTTATTACTGTATCTCTATTTAAATTAATATCGAATCTCAAGGAGTCGATGTTGGAATGCTAGAACAGCTGAAGTTCTCTGAAGTTAAGCAACGTCCAGCAGGCCATGGGTAGGTGACCATTTGAACCTATGTGATACTGCTGG…	32759
	Scaffold_4	27040345	27043922	3577			ATAATATGTCTTGGAATTACTGCTGGAATAATTGTACTTATTAGTCTTAGTCGGGGAGTATACATGAATAAGGCTACATTATTAATATACAAAGTGTTGTATCTTCAAGTGAGGTATATCATTGTAATTATTTATTAACTTATGTTACAGATAGACCATTGAGAAGAACTCTTCTGTTGGCAATGGTCCTAACACACTGGCAGTATTGCCTCTCTGGATTGTCATTGACTGTATTTCCTATTTTTTCAATATTCTTTTTTTCTCCTTTGTCACTGCAAGTTCTTTAGATATCATTCACTGCAATGGTAGTCAAGTGCGCTGGTCTGAGTAATCCAAGGAAGTGTAGGGATTCATTGGTTCAAATCCCACCCAATGTATTAATTTTTCCTCATTTATTTG…	2		GAAGTTTAAACCATTCACAACACGCCGCTTATCTCGTATAAGTTACATTCTTTCCTCGTAATAATTTTATTTTATAATTTGGTCCAAAAACATTAACGATCGAATTATGAAACAGGATTAAATTAAAACTATAAGTAGACACTATCGACTGACTAAATTGCTCTATGATTGGTTGAAATTCTCAGTAGAGGGCGTGTTAAGGGATAGTGTCCACTTCATTCAATCTAATCCTATTTCATTATTTGGCCCACAGACATCAAAACACAATGTGAACTTTAACCTTATAAATTCAAGGCTTTCTACATAAATATCTTTACAGATTCGAATATTCTAAACCCAAATAATCCCTTTTTATATAGAAGATATCTTTTCAAGGTGTTCATCTGGCTCTGAGCCAAA…	32759
	Scaffold_11	16213109	16216686	3577			>Scaffold_6:7395511	1		GATCTGTGTTTTTGTCTATTGGCCTAACAAAAGCTAGTAACGTACCCATATAATACCCTATTATAGAGGTGCGTTCGGTTGACAGCCCACCAGAACGGATATTGAAAGGGGAACAAAATGAAAATTTTGGTGGCACAAAACGTTGAGCCAAACTTGGTCAAAATCCGTTCTGGTGGGCTGTCAACTTAACACACCTCTATAATTTAGTTAGGACATAATTATGTTTATATTGTTAGATTTTTCTATTCTTTTCCTTTTAATTGTATATATTGCCATGTTCTCATTCTTATAGTAATTATTTGTACTGTACATATTTATATCTTTTTATATCTAGTAAAGTATAAATATAGTAATAATAATAGGATGTATTATAAATTAAAAGCATGAATTATCGCTCCT…	32759
	Scaffold_11	6212141	6215722	3581			GAGACATACGATAAAAAAAAAAACAACAAAAGCAGAACGTAAAAAAGGGGTCACAAAATGATAATAATGAAAAATTAAGGATCAAGTGAGAAAGAAAAGTTAATGAAGAAAATCAAGGAGAGGGGGTGAAAAAGTCAATGAGCTGAATATTCAAAGGCGAAATACTGAGAACAAAAAGAAAGGGTTGGACCAGAGAGAGAAAGAGAGAGAGAGAGAGAGAGAAAAAAAAAAAATCCAGGAAGGGACGAGAGACACAAGAGATTAAAGAACAATTAAAAGGGGTAACAAAAAAAGGAGATAAAAATCCCAGACAAACTAACAAGGGGGTAGAAAATACAAATTCAAAGGAGAAGGAGGGAAATTAGAGTAGGGATAAAGTTAGGGTGAAAGAGAAGAGGG…	2		CTTATTATAGGATAAGGAAAGTAAAAATCTTATTTTTTGTTAATGTTTGTTTCTTGTAAATTGGTTTCATGGTCAATTGGTTATGTACCGTAAAATCTACAATACCTAAAGGTATTTATTATATTATTATAATAACTATCTAAGACATACTTTATAATAATAACATTCTTTAAAAGGTAACCACCAGGCGAGGTTAATGCTCGAACCATTTTCTACCACCTCAGAGTCTTATTATTCTGTGGTCACTAACTCAAATTAATGAGGAAAATATCATGCAATTGGGTGGGTGGAAGAGATTACCATAGGCAATAACCCCGCCCTTTAGTTAGGACTTATGTTTTTGTTTTGTATTTTCTATTCTTTTTCATTTTCATTGTATATATATTGTTTCCATTTTTT…	32759
	Scaffold_12	9925861	9929458	3597			>Scaffold_2:41828867	1		CTTCTCCTTTTCCTTCTCCTTTTACTATTCTCCTCTTTTTCTTTCTCCTTTTCCCAACAGCTTCTTTTCTTGTTTCATACTTCATTGTGTTGTGTGTGACAGGGGAAGAAGAATAGTAGAATTCCTCCTCCTTCTCCTCATTATATTATTCCTCCTCATTCTCCTCATTATACTATTCCTCCTCCTTCTCCTCATTATACTATTCCTCCTTCTGCTACTCATTATATTATTCCTCCTCCTTCTCCTCATTATACTATTCCTCCTCCTTCTCCTCATTATACTATTCCTCCTCCTTCTCCTCATTATACTATTCCTCCTCCTTCTCCTCATTATACTATTCTTCCTCCTTCTCCTCATTATACTATTCCTCCTCCTTCTCCTCATTATACTATTCCTCCC…	23695
	Scaffold_5	33936026	33939651	3625			TTGCGGTGTTTACTACTTGGGTACCAACTACCTACTTTGGTACCAAACACGCAGGTAAAAATTACTAGTTGGGTACGGAAGATGTACTACTTGGGTACCAGATAAAAGCAGGTAAAATATTAGTACATAGAAATTAAGTATATAGGTTTTAGATTATTATGACATGTCGTTCATTAATAATTGAATTAGTTCTCTCTGGTCATCCATCTAGTGATTCATAAATGAAAATGAAATTATTGTCTATTGGAAATTGATGCGTAAGTGAATTTTTTGTTAGAGGAATTTTGTAGTTAGGTAGGGTTAGGTAAAGTTAACAAGGTGAGATTGCACGGTAGATCACTGACTTTAGTTTGTCGGGTAGGATGGTTGGGCGAGGGGCTTAGGTTAGGTTGAAATTAG…	2		>Scaffold_12:10205940	21
	Scaffold_2	1735986	1739614	3628			>Scaffold_12:9753797	1		AACAAACTGTGACGTCACTAAAGAAGCCACATACTTCCCTCCAAAAAAGTTCCGACGCTCAGCAACCGCTCAATCCAAATCGCTGTGATTCCGACCCACAATTCCTCTAAGAAAACTGTGATCGTTTACTTAGCAACCAGGACTGTGATGCACAACTTCCACTCAACGCGAACCGTCAGGATTTAGAAAATGAGAGCTTCGCTTGTGCTGCAAAAGACTATGATGCACACCTGCCGCTCAATGCGAACCGAGGAGAGTTTGATAGCTTCACTTGCGGCGCAAAATATTTGAATAGCGGGAGTGTTAATGGCGCAGTCGGGAGTCCAGAAGAAATGCGCAGGAACACAAATAAGATGTACTACCGGAAGCTGCACAAGTATCTGCTGTTCCGGAGTGATC…	32759
	Scaffold_11	18591514	18595147	3633			TTCATTGCGAACATTTGCCAATTGACGTGCTGTTATGTTGTTGCATACTTGGGTGATGGCATCTTTCAATGCCTCTACATTGGGGTATGTTTTACCTTCGTGATAAAGTATTGCTTTTAGGTAACCCCAAAGAAAAAAGTCATTTGGGGATAGATCGGGTGATCTTGCTGCCCAATCAATATCACCATTGTGAGCTATCACCCTTCCTGGAAATGCTGCTTGTAAAAACTCTTTGACTAATCTTGAGTTGTGGGCTGGACAACCGTCCATTTGAAAAAAAAATTCTCTTTCACCAACAACATTTGTGATTAATGGACCTATTTCATGAACAAGGAGGTCGAGGAAGAGTTCTGAAGTTAGACTTTCATTGTAGAATATTGGACCAATAATGTGTTGTCC…	2		CTACTCTATACCCGAGGCATGGCCAATTGGCCATAAATGTTTTCAAGAAAAAAATACTTGGAGGGTGAGAGATCCAGTGAAAATAGACTACGCTTTCTCGAGGTAATTCGTCATTTGTGCTTACCCGCAGATGTCTAGAGATGTCTAACACTTGAACTAAAATGGGCCTTTTCAGGGACACCAATTTTATTGATCTAAAACTAAAAACCAAATCTTAAAAAATTACAAGTTTAAAGAAGGTACTGACTTGTGATCCACACTGAATAAAAAAATACCTGCTTCACATTTTTTCCAATGGCCCAAGTGATGGATTTTTTTCGATCCCTTCGCAGGTAAAAGAACCTTTTCTAATGACATTTTGGCCCATCTGATGAACCCTGGTTGCTTCGAATCCCACCC…	32759
	Scaffold_4	5142123	5145769	3646			>Scaffold_7:3017509	1		GCGAGGAGCTCTTTTTCAATTGTTGAATAGACGGATTCGCTTTGGTTGAGGGTGCGGCTTGCGTATGCAACAGGAAGATCGGAACCTATTTTACCTTGGGAGAGGATGGCACCAATAGCGTAGTTACTAGCATCTGTTGTTAGAATAAAGGGTTTATCAAAGTCGGGATACTGTAGTATAGGATCATTTAGTAAGAGATTCTTACATATTTCAAAGCTATCTTTAAAGTCTTTGTCATTAATGTTGATTTTTGCGCCTTTTTTAAGTCTTAAGGTCAATGGTTTGGTGAGTTTTGCAAAGTCTTTTATGAATTTCCTATAATAGCCAAGTAGTCCTAGGAAGCTTTTAATTTTCTTTGTAGTATTTGGGATGGGGAATTGTTGAATTGCTTTAATTTTA…	32759
	Scaffold_2	2483184	2486831	3647			TCACGGAATAAAAAAAGTAGATTGAGTAGTATTATATTGGTTATCATAATTTCTAACTGAGATACAAATAATAATAAATAATTTTATTATTTATCTACTAAATAAATAAAATAATACATTTTATAAAAATAAGTTTAGTAAACAAGTTTAGTTTCCTAAGGGCTTAATGAATTATAAAGAAAAGTCCAAGTCCTCATGATGGTTGATTGCACATAGAAATATGTGGTTCAGGACGAGACAACTTTGAAATAAAGTTGGCTGGAGACCATCACTCACCCCTCCAGCTGTAGCCAAGCTGGCTACAACAACACCTATCTAAAATGATGACTTCATCTTGACTTGTCGAATACCATGTTGTTTAGAGTGCATCAAGTGGTGTATTTATTGGTAAAAAAAAAA…	2		GAGGTATGAGTGAACCCCGAACATCTAAGTACAGAGCAGAAAAAATCCTCCCCCGCTGGGAATCGCACCCAGGTCACCATGTGTGCAATGTCTAGCGCGCTAACTCGCTCTGCCATAGTGACTACTTACTTTCCTTATTATAGGATAAGGAAAGTAAAAAAATAGTACCAAAAATTATGAAACAGTATTAAAGTAAGACAGGCCAACACGGCCTCAAGTCGGAGTGACCAGGGTTAAAATTGTGATATGATAAAACACAGAAACACATTAAAAAAAAAAAAAAAAAAATAGCGAAGTGGAATAATACTAGTGATTATTAACCCTGATATGGCGGTGATTTTTTCTTCTTATTTTTTTTTTTTTTTTTACACAAACTTACGGGGTTAAGCCCATTTTTGT…	32759
	Scaffold_1	23024698	23028395	3697			>Scaffold_10:16490180	1		ATATGTAAACTCAATATGTATTTTTTTATAAACATAAAATTGACAAATTGTCTAATATATTCAAAAAAGAGCAATTAAAATACAGAGGACATCGAGACCTTTTTCATTAAAAAAATCAACCGAATCTTTTTAGATATTTTACCACAGTGTGGCCCCCTTGGCTTTTACGATCACCAAATTTTACTACTGAACTATAATATAATATTATTTTTTCAACGATTCAACAAAATTTCAAGAGCCTTACTTTTTCATTAAATAAAATAGAAAAATCATTTTCGATTTTCACCGAAACGGCCCCCATTTGTCCCCGAGTGGCCTAATTTGGCCCAAAAACTAAAAGTAAATTCCAGGACCCCAATGAACATGTATACAAAATTTCATCTATTTTGAAGAATCTGT…	25017
	Scaffold_1	24800602	24804337	3735			CAGATTTGTCAGTCTTCAAAAAACAGTCCAAGAAGCAGCATCGAGAGATTTTTCCGAGACGGAAATTAGCTCTCCAGTGACGCGAAAAATTACGTGAATTTTGTTTGCAAAAGTTCCGCGCCAAAATAAAAGATAAAGTTGCAGAATTCGAAAACAATTTTGATCGCAATTATTCTTGGACCTAGTGAAAAGTTGCTTTTTTATGTAGAAAAACCAAGTTTCCGCGTGTTAATTTGATCAAGTTATTTTCTGATGCAATTTATAAAGTTTTCTGACGGAAAATCTTGAAGAAATTTCAGTGCTTTCTTATGTAAAATTATAGCGGAAAGCAGGAAAAACTGCAAGTTAGACAGTAAACAAATAGGAAACAAGACCAAAGTTAATGCTCATCAGTGCCGG…	2		>Scaffold_12:19748829	21
	Scaffold_5	23186940	23190741	3801			>Scaffold_7:7345228	1		ACAAAACTTTTAAACGTATTGAAAATCACAACTACGATGAAATAATGTCAACATATGAAATAGTAAGCCTTGAAAACAGGAGAAAAATACAAGACCTTATTTTCATATATAAAATCTTAAATAATCAAGTGTACTCTCCTGAACTCCTTGGTAAATTAAACATAAAAATAAAAACAAGATTCACAAGATCGAAGGATACATTTGTTCTAGGTGGAAACAAAACTAATCTAGGTGAACATTCGCCCCTTCACCGAATGAAGAAAATGGGAAATATCGCCAGTCATGCTGGTCTGGATCTGTTTTCCTGCCATTTAAGTGATGTATTACATTTTTTTACTGAATAGTGTCCAATTAACTTGACCTAACTTGATTGGGTTGTAACTTTGTAAATTTATATTC…	32759
	Scaffold_10	27733334	27737149	3815			GTGCCATTTCTTTTTCTCGTTTATTTTTTTAATTTTTTTTATTCAACCTTATAATTAAATTGACAGTCTTCTAGATCGTAATTAGTAAAGTCAATTGTCTTTTTCTCAAGTCCTACCTTAACTAAAACCCCACCAATAGTATCTTATACTCACAACCTTTAGATACCTTTTTCTAAGAGCCATATTTTCTTTTTCAGTTTACAATATTTTTTTAGTTTTTTTGTGTCTTTTAGTTTGATTTTTATAGTTCAGTCAAAGTTTAAAGTTGAACCAATAATATATCATATTTTTGTTCTTCATTTCCGGTGAACGCAACATTTTATGGGCAAGCTACAACACAGACCACAAGCGTCTACAATAGCTCCTGTTTCTTGGCTACGAAATAAAAATAGCTGTAAA…	2		GTATAAATAAAAATATTCATAGAACAATTCATTAATGTGTAGATAGCTATGGTTTAGGTTGGGAGAAGGCAACTTGAGGTGGGAATCAAGCCGAGATTGACCAAATCTTTTTTGTCTAATAGCCAAAATAATACATACCTACTAAAAGTAATACAATTCAAAATTTTACTATCTGAGTGGCTGTGGCTCATGACCTGCACCATGAAAACAGGAGAAAACATATTTTTAAGAAAGCAACAATTATCATCTTTGGAAGATTTAAGTAGAGACAGCTGTTATTTATGTTATTATTTTTATGTCACAAGATGTAGTGGGTAACATCGACATTACGAGAACTATTGCTAATATCTCCAACCAACCGTCATATTTATTCCAAGCAATCAATCTCGTAATGCCGCC…	32759
	Scaffold_4	29626379	29630205	3826			>Scaffold_12:12755883	1		TTCTCTTTTCTCTCCAACTCTTCTAAATACTTCTTCATTTCTGGCTTTATCTGACCACTTGATTCCTTCTAGTCTTCTCCACACCCACATTTCGCAGCTCTCCAGATATTTTTCCTCCTTCTTTCTCATCGTCCACGTCTCTGCTCCATACAGCACCACACGTAACACTTTGCAAATCTCTTCCTCGGTATCCTTTTTGCGATTAAGCTTAACAGTTACATAATAATATCAAACATTTAAAAAGGTACTGACAACTAATTTAGAAAAGATTTTTATCATAAAACCAAACTCAAAATGCTCAAATCACAATTACTTCTTGTTATTTCAGCAAAAATGCCAAAACTATCTCGATCTTGAAAAAAATTGAACTTTTTATGTTTATGTTTACATTTGTACCGG…	32759
	Scaffold_5	30848498	30852342	3844			GCTAATGTCAGAATGTTTTGCAATATTGGATTTTTTTGTACGAAATATAGTGAAGGTTTGGTAAGGACAACAAAAATTACAAAATCCATGAGAGTCGCTTTGGTCCAGAGTGCTGCAAAAAAATTAGGTTAACTAATTTGGGAACACCTTGTTCCTCCAATTTAGAGTTATAGGTTCACTTCTGTAAGTATTACTCTAACGCACGACGTATTTCTTGAATGGAGAGTAGGGGCCAAATTATGAAACAGGATTAGATTTAAAACTATTCCTTAACACGCCCTCTAGTGGGAATTACAACCAATCACATCCCACTATAGTCATCTGATAGTGTCCACTTAGATTAAACCTAATCCTGTTTCATAATTTGACCCTCTAAAATAAATATTTAATGGCTTTTAT…	2		CTTTTTATGTTAAAAACTATTGGTTTTCTCGTGAAATTTGTGCTGAATAAATGATATGAGTCTTATTGTTCAGCCCATAGTAGGAACAGGGCTAATATAACTTCAATTTATTTAGAAATTAGAAAGAGGCTAAAAAACCGAGTGCAGTACTTGCCTCCGGCCCTGTTTTCAAGATACCTTAAATTAGGATAAATAATAGCACAATTTATACTCGAAAACGGATAGCCTTTTCACTTTTTCTAGAAATGTTGACTCCTTGTAATTTCTCCTGGTAAATTAAATTAACTTCTTATAAAAATATTGCTGAATTATCTGAGATGAAATGTACAATATCTGTGACCCTATTTGGTTGTAGAAAACTCAAATTTGTCTTAAAATACTTCTACTGTCAGCTTATTT…	32759
	Scaffold_3	36716070	36719944	3874			>Scaffold_9:22290873	1		CTATTGCATATTGAAGAACACTCGATGCCTGAAGCGGTCTGTGTGACCATTTTTGTGCAAACTGCAAGTTATAAATGAAATTTTTTTGAGTACAAATAGTTCTATTAACCAACTATATCAATCAAATCTAATAGTTAAAATAACAAGGCGATCAATTTTTGTTCGGTGGAAGAGAAAGCCACAAGCTTTAACCTCGCCCTTGGTTCGCTACATATTCTTTTGGGTTCTTTTCAATTCATGTCCTGTGTTGCAGAATGTATCATGTTTGTAGTTTATCAATAAAGTATTAATAGTTTTTCGGCATTATTTGTTATGTTTTTGATATCATGATTGTGATAAACACAAAAATGATATTTTTAATTTTACTTCTAAAAATAAAATCACAATTTGTTGTTGTTG…	31572
	Scaffold_3	36478664	36482540	3876			AAAATGTGAAAAAAGAAAGTCGAAAGGTTCCCTGGGCAAGAAAAAGTCGCGCGGAAAAATTGTGAAAGTGATTGAGTTTAAAAAGAAAGGAAAGAGGAGAAATTCGTCTTCCTCCTCATCTTCTTCTTCTTCCTCCTCCTCTAGTTCCTCTGATTCTTCCTCCGACTCTGGAGGCGAGGAGAAAGCGAGAAAGAGTCAAGACGGAGAAGAGGAAAGTCAAGTGACGAGGAGATGAGGTGCGAGGAAAAATTTTGTGAAACTCGCCCCCAAACAGTCAAAGATGAACGAAGTAAGAAGGTGCAGGAAGAATTGTGGAAACTCGCACCCAGCAGTAAGATGAACGAAGTGAGAAGGTGCGAGGAAGAATTGTGAAACTCGCACCCAACAAAGATGAACGAA…	2		>Scaffold_1:19066342	20
	Scaffold_3	51774489	51778405	3916			>Scaffold_5:36533071	1		ATTAATTTCGCCCTAAGATAAGAAAACTATCCGACAAGGAAATTTGTTAATAATTTTTATAGGCCCTCCCTCAAGTCGGAGTTTGAACCAATCACTGTGCATTGTAATAATAATGTTGCCAAATAATGCATGATCGGTTAGGACTAATGAGTCCCATTATTCCAGCAGTAAGTCCAAGACCTATTATTATGTGGTCAAAATCCCTAATGGAAGAAAAAACTTGGCATGTCCCGGCTGAGTTTTGAACCCGCGACCTCTGGATTACCAGAAAGACTCCTTGACCACTGAGCTACTTGACAGGACTGTAGCCTGACTTGAGGGACAGTCTGGCTTATCTATTTAGTCCTGTTTTATAATTTGGCTCTTTGTGGAAGATAACCACTAGACAGAGGGAAGGAA…	32759
	Scaffold_11	27159118	27163049	3931			GACAATTTCACCGAGTGTCGAATTTAATGTTTTCAAATTCAGACCTGATATTTGTTTACTTAAGAGTACAAAAATATTGTGTACTCAAACGTTTTTATTTATTTATTATTATTGAGAATGTATTTAATATTTTCATTTCTAAGAAAAAATAAGACAATAGGGAGAAAAGTACAGTGAAAAAAATAGAAAATCTTTCTTCGTGAATGACAGCCAGAGGGAGGTGTGATATTGAAAACAATGTGCAAAATATTGTACAGTAATATTTATAATAAGTACATAATTTTATATAAACTGATGGCAAAAGAGCCATTTCAATTAATTTATACTTTAGAATTTTAAGAAACCACACTTACCACGACGGAAGTAGGTAGCTTTATTTATAGAACGAAGATAGTTTAT…	2		ACTTATTAGTCTTAACACGTTTGTTACCAAGCCAATTTTTTCAAGTTTTACGTAGGGACCAGGCGGTAAAGTTGCTGTTGCATCCTGGTGACCAAATATTGGTCCCCAGGTTTTTTTTTTGCATATTTGGCATCGTATTTGTACAAGAATCGATCCTATATCTGTTCTAATACTAACAACCTACCTCCAAAAGGCCATATATGGATGTCCGGTCCCTCGTTAAAATTTTGATAACAACCACATGTGTGTTTTCGGTCCCAAAGAAAAACACAAAAACATCCACATATGGCCGTTCGGTAACGAACGTGTTAACTAGGTAGTATAAATAAGGTAATTCCTTTTTTTCTATGTTACTTACCCCCAGTCCACAACATAAGACTCATAATCCCAGTACNNNNN…	32759
	Scaffold_10	6019694	6023638	3944			>Scaffold_3:51006751	1		AATTTACAAGGAAAATAAGTGTAATTTTTTGTTTGTTGATATCAAAACATTATCTAAACTGCTGTTTTGAACTGGTTGGCTCTCTAGGCAGCAGTAGTTGTGAATAATTTAACAAAAACTGATTATTTGAAAGCACAATGTGAATAACTGTTTTCACATTAGTTGATAATAAAAAAAATGCTATATGACCCATTGTTAGTCAAATTGAAAAAGATATGGTATTACTGCATTGTAATAATGTCCCTTTTAACCAAACCAAATTTATAGTTTCAGATAGTTGTTATTACAGCTACTCCCTCCTCCATATTATATTTACTTTTTTTTTTTTTTTTTTTTTTTTTGGGTAAAAAAAGTAAGCAACTGTTAGAATCTGTTGCAATCTCAATATTTTTTTTGGGA…	32759
	Scaffold_9	7059901	7063861	3960			CCCTTATTAACCCCGCGTTGCATTGACGCAACACTGGTGGTAGGCCTAGTTTTTGATTTTTTTCTTTTCTTTGGTTGGTATGTTCGCATTAAAATCACGTGATCTGCAATGTAAACAAAAGATTCTTATCACATCAAAAGAAAACATGCTCATTTTGTAAAAGAAGTACAAGCAGAGGAGATAAACGCCAGGGCGTTTATTTTCGGAAATTAAAATGGCTGGACCTTCGAAGGTAAGTTCAATTTTACTTTAAAATTAATTTTATTTTTTATTGTCTGTTTAATTATTTAAATTAATGAAAGCCCCTGGAATCCATAAATACATATTTTGTAGTCAAAAGTACAATTATTACTGCTCTATGGAACCCCATTTGAGTGTGTTGCATTCTCGCAACGCGGG…	2		CAAACCTGAAAATGTTCGCGGATGATAGTTGCATCCTGTCCATACACCATGATGTAAAAACTGCAGTATCAAACGCACAGTCAGATTTCATTAACTTGCAAAAATACCTGTATAACAACCATATATACCTAAACCAGAAGAAAACGGAAGCGTTGGTCATGGGATATAAGAGCAAGAGGACAGATATGAACAACAATAAAATCTACTGCCACGAACGCAAATGTCTCGAGAAAAAAAACATATTTAACCACTTGTAGCTGCCCCCAAATAGACTATAGTAACGAAGCGAAATACCTAGGTATTACTATTGACAATGAATTTAAAATGAAAAAACATGTATATAACCTTTGCTCAAAACTTCGAATCCTAAATTACCAACTTAATGTAATAAATGCGGGT…	32759
	Scaffold_1	20121538	20125503	3965			>Scaffold_5:29561264	1		GTGGAAACAACATTCAAGGCAAAGAAAACCAACTTAAAAGGTGGAAAGAGTACTTTTCAGAACTTTACAATCAAGACAATTCAATTGATCACAACCAACCTGACATCACACTTATTGATTGCGAACCACCAAATGATGATCCACCATCTAAACAAGAAATATCAGAAGCTCTGAAACATCTCAAAAACTATAAAAGTCCTGGTCAAGATGCGATAACTGCAGAAATGTTAAAGGCTGATGTCAACAAAACAGCAGAGATTCTGGTTCCACTTCTCAACAAAATCTGGACTGAGAAGTCTCTTCCGCAAGACTGGAAAGACTCAACAATCATTCCTCTGCACAAGAAAGGAAATAAGTCTATTTGCTCAAACTACAGAGGCATTTCTCTGCTTTCAGTTC…	32759
	Scaffold_1	13205999	13209982	3983			TAACTATGTGGACGGACAGGTTATACTAAATTACTAAAGATAATCGTATCTGCTTGAAACGTTAAAATCAAGTGTAACTTGGATATTTCAGACCAATACGTGATCTCTATTACCTATCTACCAACTGAGTCACGAATAACAAGCTTTATGAACACATCTTTGAGCCCTTGAACACAGAAACATACAGAATTCCATTGATCAAATTGTGATACAATTTTTTCTCATTGTTTAAAAATTTGTATTTTTGTAAATCATTTTGATTCCTTTAATTTTTAATATTTATAATATTTGATTGTAATTTTAAGTAATGTTTTGTTGATTACTTAAATGATTTTTCCCGACTTCAATGGTGAATTTCTCGACGACTTCAATTATAAGTCTTTGGTCTTAGGGCGAAAT…	2		AATATGGGTTATCAACTGAACACTTCTATGCAGAAAAGAGTAACTGGGTCATTTTAAATTTGATTTTTTTGTTATATAAAAGGTTTATTAACTTGACAATTTCCACAAATAATGTTTAGACTGAAACTGAAGTGAAGAAGTTGATTTTTTTTCTATTTCATTACCAGATAGGTACCTGAAAGAATTAAACTCTGACATTTCTCATTTTTACAGGTTTTGTATTTTTTATGATTTGTTTTGAGACAAGTTGACAACTTCACTCATCATAAACAATAAAAATGATTTTGCATATAACGCCTAAAAACTAAATGATTATACAATGTGAATTACATTACTAGAAACGTTTTAAACATTAATTGAAGGGGTAGGAAAGGTTTCCTCAAAATAATAGGCAGTATG…	3993
	Scaffold_6	3659468	3663504	4036			>Scaffold_12:13307328	1		>Scaffold_9:14505275	20
	Scaffold_9	25840187	25844234	4047			AAATAATGAACTGTTGAGAGAAGAAAATGTGAACAGGGACTATAAACAGGGAGTAGACCAGTAGTCTGGCTGGTGGAATATAAACATTGAGTAGAGCAACAGTCTGGCTGGGGTACTATAAACAGGGAGTAGACCAGCAGTCTGGCTGGGGGACTATAAACAGAGAACAGACTAGCCAACCCTTTAAAGCCAGGCTAGCTTGTAGTTTCCTAAGGGTTTAATGGCTTATAAAAAAAGTCCCAAGTTCTCATGATGGTTGATCGCTCATAGAAATATGTGGTTCGGGACGAGCCAACTTTGAAAAAAGGTGGCTGGAGACCATCACTCACCCCTCCAGATGTAGCCAAGTTGGCTAAAACAACAACAATAGTAGACCAGCAGTCTGGCTGGGGGACTATA…	2		CTTGGTATACAAATGGCAGTCGTAAAAACCCATTAATATTTTAATAATTTTCCGACCTTAATTATGACTACATTGCAGTAATATAATGGTCCACGTTAATTGTAAGCAATATCTAATATTTATTTTGAACACTAAATAGCAAAACCATTAGTGGCTAAGAAATTGTAATTTACAAAAAAGGTAAAACTAGCCACTCAAATTGCTACACCCTCTCTAGCCATCCCCTCTCAGTTCACTTTTATGTTCATTGTTTCCTACAGTAAGTTCTTGTTCATAGATAGTTCTTGGCCAAGACACACACACTTCTACCTTGAACAGGCTGGCAGAAAGTGTATCAGCTAGCAGGATTGATCTGAAAGAAATCAAAAGTGATTCGGTTACGGTGCTTGCAAACTAATT…	32759
	Scaffold_4	4305971	4310035	4064			>Scaffold_3:1371361	1		CTAATGTATGTCACATTCAGTAACAAATGTAGTTACCCAAAAATGTGGCAATATTTGTTACAATGATTATTAAACAAAATGTAATAGATCAAAAAATAATAATATATTATGATAATGATGATGCAGAAAATGAAGAACCCCTCAAAAGGTGGACTCCACGCCACTGCTCCTAGCCTCACATGTTGTGGTGTGGCGGGTGGCCAATTTTAACCACAAGTAAGGTTTTCCTCATATGACCTTTCCACTATTAGTTTAGTACTTCTATTTACTCTACATACGTACTTATTTAACTACGCACCTATATTTAGCTTTCCAAGTATAATGAGCGACATAATTAGCTCGTTAGGTGGCTAAGTATTGATATTATCCTCGTATCAGATTCGTAGAAACACCGACCAC…	32759
	Scaffold_1	35507216	35511281	4065			TTGTTTACATATCGTGCGACATTTTCTCTCTCGAACAGATTTCCGTCAAAATCCTCGAACTTGTGGCTTATCCACGTGCCCGGGGTTGGAATTTCGACAGCACTTGACCTTGGATTCGACAGATTCAGTGAGTAGCGAAAGGGCAAAAATTCATTCCGAGAGCATTAGGAACAGATTCAAAGAGTATTAAAAACTGTAGAATGTCGAGTTGTTGACATATACTTTGGCACACCGATATCAGTATAACATTTTTTTATTTTTTTATTAAATATTTCGTCAAAAGATGAAAGTATTGGTGAGGTACCTAAAACATTGTATCGCAAGAGCGGAGTTCCTATTTTTAAAAAATGGACCTGGCCTGGCCCGAAAATTGCCTCCAGTCTAAAAGAGAGTTTATTG…	2		TTTACCAATATAATCTTTCTTTTTCAGCTTCTTCTTCTTTTACACGCGAACTGCAAAACGATTTATTTGAAACAGGACCTGTCTGTCCATAGTACGAATACCTATAATACTACGAGTATATCATATTGTGGTACATAAATATCTATTATATACCCCCTGGCATCAGGATCTTCCTCATAACAATCCACTGAGATCTTCTAAATAGACATGCGCGTGCTCTAAACTTGGTATGTTTTTTTTAAATGTCTATGAAGAAAAATTGGAGTTGCACTTGCAGTACACTTTAGTCTAAAAAGACTACTCTCCTCAACACATGTCACCGATAACCATATTGATGAACATGATTTTGACACTTGAGAAATGCTTCCATGTAATTTAAGTTACTTGAGTGTCAATGTC…	32759
	Scaffold_9	6835043	6839120	4077			>Scaffold_4:31726653	1		CATTTATACATACATCATACCTACTCTCAGATCTGTCATGGAAAGACACAAGATCATGCCTTATTGCAATGGCAGATCTCTAACCTCTAACATAGACCACATCTAGAACAACACTTGGGTTAAAACAGGTGATCTCTTGCGAATATTGAAATAGCAATTCATCAGTGCTAAATACAATCGGTCTCACTAAATCTCACTTTGCTTTGAGAGAGAAGACAAAGGCAGCGGTTCCTAAATAACCAGCAGTTCTTAAAAAGCCAGTATTTTATTAGTCTGTCCCGTTAGCTCAGTGGTAAAGCGGCACTCTGTGAATTCAGATATTTCAGTGGTCGCAGGTTCGAAACCTAGCCGGGACAGGACAAGTTATCCTCCCATTTGGGATTTTTACCACATAATAAT…	32759
	Scaffold_2	27784626	27788734	4108			GGTATACATAGTTTCTATTAGATTATTAATTATTTATTTAACTTTATATATTAAGTTTAAGCGCGTACATACCTTTTACTTAGGTATAAAACGGTAGGAAATTGAAGTTCTTACCAAATGGATGCTGTTCCTCTGTGAGAAAATACTTGGACCTCATAGAATTGTAGAACAACGTCTGTATTGATTTTTATGTTTAAAATACACTTTGAGCAATTATTATGTTTTATTACATTTTTTGTTATAGGTTTTAATTTTGATAAAAAGTGTCAAGGTACCTGTCTGGGATTTTTTTTTTTTTTAATAATTAATTCAATTAATTGTGATTGTAACCGAAACTAATGTAAAGAATTTTGCTTGTACATTTGAAGTCAATTTAAATTTCACAAAAAACTAGCGAAG…	2		TCTCCATTGAAAAAAGAGTTTTTTTTCAGAACGTGTTTAGTCCACCAAGTACTGTGTATCATACCATGATTAGTCCCAACAACCAATCAGAACACTCTGTTATTTCAAGGTCACGCGATGTAAAGATGAACAGAATCAGTTTGGTTGGTACAAAAGTATCCTCCAAACTGAAAGTATTTCCAATGACTCTGAGGAAGAAGTCATTTGTGAATGTCTGGAAGATGAAGTAGGACTAAAAGTTTAATTTTTGGTCTATCCTCATACGGACTCATACCTATTATTAAATGTGGAACAAATTGAAGCTAGATTAGATCAAATTGATTTCCTGTACCTTTTCATAAAACAACTCAAAATATAGCTTTTTACTTTGTTCAAAGCTAATAAAGCCTTTTAATTTAA…	32759
	Scaffold_12	20930079	20934206	4127			>Scaffold_10:16728972	1		TCACATGTATGATAATGATAATAATATCGCCTTATTTATACTGCCCGAATAGGACAGTTAAAGTCCCATTATTTCAGCAGTAAGCTCAAGACACATTATTATGTGGTAAAAATCCCAAATGGGAGGATAACTTGTCTTGTCCCGGCTTGGTTTCGAACCCACGACTTCTGGAATCTCTGGATTCACAGAGTGCCGCCTTTACTACTGAGCTACCGAGACAGACAGTATGATAAAATGGTAACTCAAAAATGATACCCTAATGTAGTCTAAAAACTCCAAGGACCAAATTATGAAGCAGGATGAAAGTTAAGCTACGTAAGACACGTGGGAGTTTCAACCAATCACAGCGCAATTCATCTTAGCGAATGGAGGATAGAAAATTCCCTTCCTTGTTCTGAC…	4149
	Scaffold_1	25202945	25207075	4130			GTTCTATCGATGTTTAGAAAATAATGCCAGCCTCCCTTAACTCTTCTTCAATGGAAATAATTTCATTGTTATGAGCAAGATGATTACCTGCTGCTTGCGATCTTTTTAAAAGTAAAAGTCTCTCTACCAATTCATTTGGGTTGTCAAAGTATACATATTCTTTGTCTTGATTGGTATCAAACATCATTCCTTTTCCATATTGCGATACTTTTGTTGTTATAGGGTCCAGACTTGTGATGTCTATGATATTTTTATAATTACGTTCATCCAATGTACTAATTATTTCCTGATTGGGTTGTTTGAGAAACAAAAGTTCCATAAGTCCACGGGTAACTGGATAAACTTTACCATCGATATAAAATTGTTCGGTTGGTGTTTTAGAAAATTGAATTTCTTTTT…	2		>Scaffold_3:4993953	19
	Scaffold_10	21087606	21091782	4176			>Scaffold_6:6469291	1		ACTTAGGGTAAATATTGTAATTTAGTTAGTACAGGGTCCGTCCGTTTGTGATTTAAATAAATAAAAAGTCCTAGCCTCGGTGGACGTTGCTTATCTTCAGTGACAGAATCAGAACTGGTGTATTCAACGTGCCATCGACGCGCGACGCTGGCTCCAAAGGTTTTACAAGCATTGAACTTGCTTAGTCAGGTACACAAAGTTACAACATCATCCTATTTACAAAACGTCCATCCTCTCTTCTGGCGAGTCCCTGGTCACTGCTCCCTTGGTCTTGCTCTGCAACATAAGAAACAGTTCAACACTTTAAAATCAATTTAAAATAATAATAATAAATGTGTTTCTTTGTGTTATTATATAGGGGAAGTGATGATCAGGATGATCTCTAGCCAACGTAAGTTA…	32759
[truncated: 1,385 more rows]

## Sheet: Sheet6
				Scaffold_4:7840879	Scaffold_4:7840879-7841081	>Scaffold_4:7840879	GTTGTTGTTGTTGTTGTAGCCAGCTTGGCTAAAGCTGGAGGGGTGAGTGATGGTCTCCAGCCAACTTTATTTTAAAGTTGGCTCGTCCTGAACCACATATTTCTATGTGCGATCAACCATCATGAGGACTTGGACTTTTCTTTATAAGCCATTAAACCCTTAGGAAACTGCAAGCTAGCCTGGCTTGTAAGGGTTGGCTAGT	202	>Scaffold_4	7840879		Scaffold_4	7840879	7841081	202	Y
[truncated: 905 more rows]
