# Supplementary material for: Insights into Bactericera cockerelli and Candidatus Liberibacter solanacearum interaction: a tissue-specific transcriptomic approach
Source: Front Plant Sci. 2024 Aug 30;15:1393994. doi: 10.3389/fpls.2024.1393994 (PMC11392735; doi:10.3389/fpls.2024.1393994)
Supplement: Supplementary file 3 [file DataSheet3.xlsx]

## Sheet: Sheet1
Supplementary Table 2. Expression level (FPKM) of the ovaries and salivary glands under CLso(-) and CLso(+) conditions.
gene	Chr	Start	End	Strand	Length	Ovaries CLso(-)	Salivary glands CLso(-)	Ovaries CLso(+)	Salivary glands CLso(+)	Annotation
ANN00001	Chr1	5813	9293	-	3481	0.131338	0.239252	0.0627437	0.0191562	Protein of unknown function
ANN00002	Chr1	14257	16370	+	2114	0.0555491	0.612608	0	0.0764646	Similar to Thap1: THAP domain-containing protein 1 (Rattus norvegicus OX%3D10116)
ANN00003	Chr1	16397	17730	+	1334	0	0	0	0	Protein of unknown function
ANN00004	Chr1	18803	26935	+	8133	0	0.0387137	0.0134252	0.0218808	Similar to THAP9: DNA transposase THAP9 (Homo sapiens OX%3D9606)
ANN00005	Chr1	28221	29766	+	1546	0.144189	0.570138	0.0629456	0.8636	Similar to FAM200A: Protein FAM200A (Macaca fascicularis OX%3D9541)
ANN00006	Chr1	32340	33039	-	700	0	0	0.624745	0	Similar to ZMYM1: Zinc finger MYM-type protein 1 (Homo sapiens OX%3D9606)
ANN00007	Chr1	36049	38079	-	2031	0.0578203	0.517557	0.303427	0.30654	Similar to ZMYM1: Zinc finger MYM-type protein 1 (Homo sapiens OX%3D9606)
ANN00008	Chr1	42475	43429	+	955	0	0	0	0.279771	Protein of unknown function
ANN00009	Chr1	44532	46647	-	2116	0.0443094	0	0.0996349	0.139431	Protein of unknown function
ANN00010	Chr1	54107	54883	+	777	0	0	0	0	Protein of unknown function
ANN00011	Chr1	74018	77991	+	3974	0	0	0.027479	0.0335584	Protein of unknown function
ANN00012	Chr1	84590	89349	+	4760	0.0689572	0.093327	0.118319	0.0747781	Similar to Transposon TX1 uncharacterized 82 kDa protein (Xenopus laevis OX%3D8355)
ANN00013	Chr1	90251	94272	+	4022	0.0495177	0.237378	0.055372	0.0401815	Similar to pol: RNA-directed DNA polymerase from mobile element jockey (Drosophila melanogaster OX%3D7227)
ANN00014	Chr1	94771	95283	-	513	0	0	0	0.260405	Similar to ZBED8: Protein ZBED8 (Homo sapiens OX%3D9606)
ANN00015	Chr1	95353	95809	-	457	0	0	0	0	Protein of unknown function
ANN00016	Chr1	96771	99373	+	2603	0.0405058	0	0	0	Protein of unknown function
ANN00017	Chr1	100126	102457	+	2332	0.100708	0	0.0486816	0	Protein of unknown function
ANN00018	Chr1	112225	112420	+	196	0	0	0	5.61721	Protein of unknown function
ANN00019	Chr1	115780	116740	+	961	0	0	0.388365	0.138883	Similar to Transposable element Tcb2 transposase (Caenorhabditis briggsae OX%3D6238)
ANN00020	Chr1	128320	129848	-	1529	0	0	0.074265	0	Protein of unknown function
ANN00021	Chr1	130037	132966	-	2930	0	0	0.0996084	0.220648	Similar to RTase: Probable RNA-directed DNA polymerase from transposon BS (Drosophila melanogaster OX%3D7227)
ANN00022	Chr1	133685	141223	-	7539	0.0349944	0.0932131	0.0376349	0.159742	Protein of unknown function
ANN00023	Chr1	141715	141985	-	271	1.30135	0	0.808697	0	Protein of unknown function
ANN00024	Chr1	146786	147370	-	585	0	0	0	0.11415	Similar to K02A2.6: Uncharacterized protein K02A2.6 (Caenorhabditis elegans OX%3D6239)
ANN00025	Chr1	149664	150853	+	1190	0.2906	0.283381	0.821171	0.484166	Similar to Cyt-b5: Cytochrome b5 (Drosophila melanogaster OX%3D7227)
ANN00026	Chr1	151337	154477	-	3141	2.03681	0.669523	2.26606	2.63424	Protein of unknown function
ANN00027	Chr1	154549	160426	-	5878	0.101689	0.0233091	0.0537845	0.07767	Protein of unknown function
ANN00028	Chr1	155327	159794	+	4468	0	0	0	0	Protein of unknown function
ANN00029	Chr1	160473	160794	-	322	0	1.67157	0	0	Protein of unknown function
ANN00030	Chr1	174111	177792	-	3682	0	0	0	0	Protein of unknown function
ANN00031	Chr1	179952	180405	-	454	0	0	0	0	Similar to PGBD2: PiggyBac transposable element-derived protein 2 (Homo sapiens OX%3D9606)
ANN00032	Chr1	180468	181767	-	1300	0	0.290827	0.112299	0.690389	Similar to PGBD3: PiggyBac transposable element-derived protein 3 (Homo sapiens OX%3D9606)
ANN00033	Chr1	182902	184513	-	1612	0	0	0.0704388	0	Similar to pif1: ATP-dependent DNA helicase pif1 (Psychrobacter sp. (strain PRwf-1) OX%3D349106)
ANN00034	Chr1	184624	185077	-	454	0	0	0	0	Protein of unknown function
ANN00035	Chr1	186270	186898	-	629	0.317055	0	0	0.257277	Similar to mariner\T: Mariner Mos1 transposase (Drosophila mauritiana OX%3D7226)
ANN00036	Chr1	188246	191059	+	2814	0	0.0657178	0.017286	0	Protein of unknown function
ANN00037	Chr1	193461	194178	-	718	0.408403	0.825929	0.158266	0	Protein of unknown function
ANN00038	Chr1	199815	202007	-	2193	0.251341	0.0574489	0.0443663	0	Protein of unknown function
ANN00039	Chr1	205225	206746	-	1522	0.138783	0	0.0639388	0.350956	Similar to THAP9: DNA transposase THAP9 (Homo sapiens OX%3D9606)
ANN00040	Chr1	207858	208086	-	229	0	0	0	0	Protein of unknown function
ANN00041	Chr1	226637	228738	-	2102	0	0	0.0540109	0	Similar to Jrkl: Jerky protein homolog-like (Mus musculus OX%3D10090)
ANN00042	Chr1	232147	232789	+	643	0	0.461208	0	0	Protein of unknown function
ANN00043	Chr1	240310	245321	-	5012	0.118072	0.0147723	0.187852	0.064486	Similar to pol: Retrovirus-related Pol polyprotein from transposon 17.6 (Drosophila melanogaster OX%3D7227)
ANN00044	Chr1	246264	253277	-	7014	0.240586	0.1172	0.0600963	0.0650887	Similar to PGBD3: PiggyBac transposable element-derived protein 3 (Homo sapiens OX%3D9606)
ANN00045	Chr1	254181	254535	-	355	0	0	0	0	Protein of unknown function
ANN00046	Chr1	254586	255063	-	478	0	0	0	0	Protein of unknown function
ANN00047	Chr1	258194	260579	+	2386	0.452083	1.204	0.854538	1.82314	Similar to TIGD6: Tigger transposable element-derived protein 6 (Homo sapiens OX%3D9606)
ANN00048	Chr1	277702	279979	+	2278	0.0257741	0	0	0	Protein of unknown function
ANN00049	Chr1	295754	297511	+	1758	0.0599864	0	0.0322928	0	Similar to thap1: THAP domain-containing protein 1 (Salmo salar OX%3D8030)
ANN00050	Chr1	300069	309671	+	9603	0.0195197	0.138766	0.117721	0.322585	Similar to TIGD6: Tigger transposable element-derived protein 6 (Homo sapiens OX%3D9606)
ANN00051	Chr1	311351	312662	+	1312	0	0	0	0	Protein of unknown function
ANN00052	Chr1	313956	315907	+	1952	0	0	0.166174	0	Protein of unknown function
ANN00053	Chr1	323432	326911	-	3480	0.325154	0.0956919	0.159505	0.0383235	Similar to Retrovirus-related Pol polyprotein from type-1 retrotransposable element R1 (Fragment) (Bradysia coprophila OX%3D38358)
ANN00054	Chr1	329942	332573	+	2632	0.164903	0.104134	0.103108	0.331742	Protein of unknown function
ANN00055	Chr1	334643	335999	+	1357	0	0.0545899	0.0402559	0	Protein of unknown function
ANN00056	Chr1	342183	344229	+	2047	0.0458037	0	0.128623	0	Protein of unknown function
ANN00057	Chr1	344265	345075	+	811	0	0	0	0	Protein of unknown function
ANN00058	Chr1	347761	349692	+	1932	0.0242657	0	0	0.0345229	Protein of unknown function
ANN00059	Chr1	358001	358568	-	568	0	0	0	0	Protein of unknown function
ANN00060	Chr1	365038	365487	+	450	0	0	0	0	Similar to pol: Retrovirus-related Pol polyprotein from transposon opus (Drosophila melanogaster OX%3D7227)
ANN00061	Chr1	367083	371460	-	4378	0.133874	1.28086	0.250244	0.35454	Similar to PGBD4: PiggyBac transposable element-derived protein 4 (Homo sapiens OX%3D9606)
ANN00062	Chr1	375949	378364	-	2416	0.0824474	0.0613034	0.0904133	0.055208	Protein of unknown function
ANN00063	Chr1	384301	386462	+	2162	0	0	0.0262556	0	Similar to tc3a: Transposable element Tc3 transposase (Caenorhabditis elegans OX%3D6239)
ANN00064	Chr1	387243	388002	+	760	0.556035	0	0.415809	0.234433	Protein of unknown function
ANN00065	Chr1	393353	396360	+	3008	0.0545673	0	0	0	Protein of unknown function
ANN00066	Chr1	421407	424004	+	2598	0.451671	0	0.145029	0.128347	Protein of unknown function
ANN00067	Chr1	424344	425099	+	756	0.24825	0.166792	0	0	Similar to tc3a: Transposable element Tc3 transposase (Caenorhabditis elegans OX%3D6239)
ANN00068	Chr1	427226	431796	+	4571	0.320442	0.279374	0.301498	0.349328	Protein of unknown function
ANN00069	Chr1	441897	442473	+	577	0.447824	0	0	0	Protein of unknown function
ANN00070	Chr1	443487	445090	-	1604	0	0	0	0	Similar to X-element\ORF2: Probable RNA-directed DNA polymerase from transposon X-element (Drosophila melanogaster OX%3D7227)
ANN00071	Chr1	447686	448251	+	566	1.05722	0	1.19745	1.61581	Protein of unknown function
ANN00072	Chr1	455860	456784	+	925	0.31691	0	0.245621	0	Protein of unknown function
ANN00073	Chr1	458683	460279	+	1597	0	0	0	0	Protein of unknown function
ANN00074	Chr1	463415	464465	+	1051	0	0	0	0	Protein of unknown function
ANN00075	Chr1	464872	465560	+	689	0	0.268698	0.588997	0	Protein of unknown function
ANN00076	Chr1	465695	466451	+	757	0.760446	0	0.798336	0	Protein of unknown function
ANN00077	Chr1	482048	492959	+	10912	0.403735	0.266987	0.317468	0.14668	Similar to RPRD2: Regulation of nuclear pre-mRNA domain-containing protein 2 (Homo sapiens OX%3D9606)
ANN00078	Chr1	518076	523862	-	5787	0.253101	0.500141	0.202583	0.181602	Similar to PGBD4: PiggyBac transposable element-derived protein 4 (Homo sapiens OX%3D9606)
ANN00079	Chr1	525161	527176	-	2016	0.0261529	0	0.103512	0	Similar to JRKL: Jerky protein homolog-like (Homo sapiens OX%3D9606)
ANN00080	Chr1	529872	532699	-	2828	0.132599	0	0.117377	0.0471621	Protein of unknown function
ANN00081	Chr1	532876	534199	-	1324	0	0	0	0	Protein of unknown function
ANN00082	Chr1	535689	537596	-	1908	0.799824	0.240608	0.0572491	0	Similar to PGBD3: PiggyBac transposable element-derived protein 3 (Homo sapiens OX%3D9606)
ANN00083	Chr1	538409	540050	-	1642	0.192861	0.153477	0.0296316	0.352173	Protein of unknown function
ANN00084	Chr1	542767	543805	-	1039	1.92502	1.98143	0.813177	4.06076	Protein of unknown function
ANN00085	Chr1	551880	552165	-	286	0	0	0	0	Similar to tc3a: Transposable element Tc3 transposase (Caenorhabditis elegans OX%3D6239)
ANN00086	Chr1	552428	552854	-	427	0	0	0	0	Protein of unknown function
ANN00087	Chr1	554461	557793	+	3333	0.11071	0	0.0619523	0	Protein of unknown function
ANN00088	Chr1	588082	589081	-	1000	0.562849	0	0	0.0890564	Similar to Transposable element Tcb1 transposase (Caenorhabditis briggsae OX%3D6238)
ANN00089	Chr1	594723	595022	-	300	0	0	0	0	Protein of unknown function
ANN00090	Chr1	595061	599955	-	4895	0.0323037	0.0257311	0	0	Protein of unknown function
ANN00091	Chr1	604528	606439	-	1912	0.705863	0.968518	0.171388	0.368032	Similar to Mctp: Multiple C2 and transmembrane domain-containing protein (Drosophila melanogaster OX%3D7227)
ANN00092	Chr1	608405	608624	+	220	0	0	0	0	Protein of unknown function
ANN00093	Chr1	625554	626900	-	1347	0.0696243	0	0.144504	0.198109	Similar to Zbed4: Zinc finger BED domain-containing protein 4 (Mus musculus OX%3D10090)
ANN00094	Chr1	632733	634913	-	2181	0.0913351	0.346591	0.513045	0.587468	Similar to PGBD3: PiggyBac transposable element-derived protein 3 (Homo sapiens OX%3D9606)
ANN00095	Chr1	649619	650349	-	731	0	0	0	0	Similar to tc3a: Transposable element Tc3 transposase (Caenorhabditis elegans OX%3D6239)
ANN00096	Chr1	651361	653481	-	2121	0.477927	0.771085	0.100182	0.279263	Similar to Mctp: Multiple C2 and transmembrane domain-containing protein (Drosophila melanogaster OX%3D7227)
ANN00097	Chr1	654963	658290	-	3328	0.0968374	0.678694	0.108977	0.27575	Similar to tc3a: Transposable element Tc3 transposase (Caenorhabditis elegans OX%3D6239)
ANN00098	Chr1	672194	674226	+	2033	0	0	0.11169	0.0397563	Similar to pip1: RING-box protein pip1 (Schizosaccharomyces pombe (strain 972 / ATCC 24843) OX%3D284812)
ANN00099	Chr1	725940	728978	-	3039	0.0616947	0	0.069364	0	Similar to ZBED8: Protein ZBED8 (Homo sapiens OX%3D9606)
ANN00100	Chr1	730241	730679	-	439	0	0	0.249256	0	Similar to PGBD4: PiggyBac transposable element-derived protein 4 (Homo sapiens OX%3D9606)
ANN00101	Chr1	730725	735982	-	5258	0.25414	0.111236	0.18029	0.0338472	Similar to PGBD2: PiggyBac transposable element-derived protein 2 (Homo sapiens OX%3D9606)
ANN00102	Chr1	736075	743126	-	7052	0.0805555	0.0702959	0.106833	0.165609	Similar to RTase: Probable RNA-directed DNA polymerase from transposon BS (Drosophila melanogaster OX%3D7227)
ANN00103	Chr1	744503	748577	-	4075	0.143753	0.112626	0.109303	0.0723851	Protein of unknown function
ANN00104	Chr1	753141	755800	-	2660	0.189401	0.300792	0.0365743	0	Protein of unknown function
ANN00105	Chr1	755822	758509	-	2688	0.0829071	0.377161	0	0.132441	Protein of unknown function
ANN00106	Chr1	762919	768230	+	5312	0	0	0	0.0304217	Similar to pif1: ATP-dependent DNA helicase pif1 (Psychrobacter sp. (strain PRwf-1) OX%3D349106)
ANN00107	Chr1	780791	781396	-	606	0.368217	0.409633	2.14899	0.855271	Protein of unknown function
ANN00108	Chr1	782654	783500	-	847	0.263323	0.76088	0.560155	0.61163	Protein of unknown function
ANN00109	Chr1	785309	785876	-	568	0.516446	0	0.856816	0.941453	Protein of unknown function
ANN00110	Chr1	802030	803573	+	1544	0.178528	0.68157	0.868539	1.74193	Protein of unknown function
ANN00111	Chr1	806196	806648	-	453	0.582943	0	0.215157	1.82844	Protein of unknown function
ANN00112	Chr1	806791	808213	-	1423	0.102962	0	0.558606	0.849389	Protein of unknown function
ANN00113	Chr1	809041	809358	+	318	0	0	0	0	Protein of unknown function
ANN00114	Chr1	812632	813657	+	1026	0.486089	3.50797	1.53766	3.43633	Similar to ZBED4: Zinc finger BED domain-containing protein 4 (Homo sapiens OX%3D9606)
ANN00115	Chr1	816782	817772	+	991	1.38519	6.00362	2.31964	5.76582	Protein of unknown function
ANN00116	Chr1	818979	821381	+	2403	0.102401	0.657861	0.279161	1.06233	Protein of unknown function
ANN00117	Chr1	822681	823584	-	904	0.337546	0	0	0.0985241	Protein of unknown function
ANN00118	Chr1	832877	837164	+	4288	0.0136897	0.0724964	0	0.0376883	Similar to Tf2-9: Transposon Tf2-9 polyprotein (Schizosaccharomyces pombe (strain 972 / ATCC 24843) OX%3D284812)
ANN00119	Chr1	849985	861553	+	11569	0.104879	0.0918401	0.142178	0.113495	Similar to THAP9: DNA transposase THAP9 (Homo sapiens OX%3D9606)
ANN00120	Chr1	864663	867245	+	2583	0.531345	0.527674	0.255745	0.297339	Similar to FAM200A: Protein FAM200A (Macaca fascicularis OX%3D9541)
ANN00121	Chr1	868387	869957	-	1571	0.582238	0.668949	0.516216	0.0849219	Similar to ZMYM1: Zinc finger MYM-type protein 1 (Homo sapiens OX%3D9606)
ANN00122	Chr1	871980	875246	-	3267	0	0	0.0347449	0	Similar to Retrovirus-related Pol polyprotein from transposon TNT 1-94 (Nicotiana tabacum OX%3D4097)
ANN00123	Chr1	875612	877430	+	1819	0.0322814	0.162869	0	0	Protein of unknown function
ANN00124	Chr1	879668	880786	-	1119	0	1.15817	0.0869866	0	Protein of unknown function
ANN00125	Chr1	885343	886497	-	1155	0.101712	0	0.0946049	0.255543	Similar to TIGD1: Tigger transposable element-derived protein 1 (Homo sapiens OX%3D9606)
ANN00126	Chr1	892703	893902	+	1200	0.0390802	0	0.397033	0	Protein of unknown function
ANN00127	Chr1	896098	899136	+	3039	0.177602	0	0.0320115	0	Protein of unknown function
ANN00128	Chr1	899350	900142	+	793	0	0	0	0	Protein of unknown function
ANN00129	Chr1	900415	901386	+	972	0	0	0	0	Similar to PGBD4: PiggyBac transposable element-derived protein 4 (Homo sapiens OX%3D9606)
ANN00130	Chr1	901980	902925	+	946	0	0	0	0	Similar to Sgs4: Salivary glue protein Sgs-4 (Drosophila melanogaster OX%3D7227)
ANN00131	Chr1	903075	903504	+	430	0	0	0.510118	0	Protein of unknown function
ANN00132	Chr1	903128	905764	-	2637	0	0.0477724	0.0414166	0.0675017	Protein of unknown function
ANN00133	Chr1	905920	911968	+	6049	0.0872313	0.261823	0.105788	0.0514653	Similar to Tf2-9: Transposon Tf2-9 polyprotein (Schizosaccharomyces pombe (strain 972 / ATCC 24843) OX%3D284812)
ANN00134	Chr1	912987	915607	-	2621	0	0	0	0	Similar to pol: Retrovirus-related Pol polyprotein from transposon 17.6 (Drosophila melanogaster OX%3D7227)
ANN00135	Chr1	919207	921080	+	1874	0.503889	0.865094	0.432734	0.973154	Similar to PGBD4: PiggyBac transposable element-derived protein 4 (Homo sapiens OX%3D9606)
ANN00136	Chr1	927254	928690	+	1437	0.0817376	0.767788	0.605902	0.263179	Protein of unknown function
ANN00137	Chr1	932328	932529	+	202	0	0	0	1.20574	Protein of unknown function
ANN00138	Chr1	934354	934858	+	505	0	0.146873	0	0	Protein of unknown function
ANN00139	Chr1	934885	936605	+	1721	0.313349	0.0430371	0	0	Protein of unknown function
ANN00140	Chr1	939684	941613	+	1930	0	0.0767484	0.0565962	0.0837583	Protein of unknown function
ANN00141	Chr1	941830	944442	+	2613	0	0	0	0	Similar to pol: RNA-directed DNA polymerase from mobile element jockey (Drosophila melanogaster OX%3D7227)
ANN00142	Chr1	944495	946877	-	2383	0.0393427	0.105733	0.0884668	0	Protein of unknown function
ANN00143	Chr1	949399	949992	-	594	0	0	0.327997	0.272462	Similar to Tf2-9: Transposon Tf2-9 polyprotein (Schizosaccharomyces pombe (strain 972 / ATCC 24843) OX%3D284812)
ANN00144	Chr1	954778	955308	+	531	0.309592	0	0.313043	0	Similar to PGBD4: PiggyBac transposable element-derived protein 4 (Homo sapiens OX%3D9606)
ANN00145	Chr1	957510	958498	-	989	0	0	0	0.134947	Protein of unknown function
ANN00146	Chr1	961098	961743	-	646	1.09114	0.229531	1.47457	0	Protein of unknown function
ANN00147	Chr1	961821	963227	-	1407	0.0666531	0	0.0403545	0	Similar to PGBD4: PiggyBac transposable element-derived protein 4 (Homo sapiens OX%3D9606)
ANN00148	Chr1	963674	965577	-	1904	0.0246228	0	0.051104	0.0849026	Protein of unknown function
ANN00149	Chr1	965618	966963	-	1346	0.309103	0	0.0811703	0.132293	Similar to PGBD3: PiggyBac transposable element-derived protein 3 (Homo sapiens OX%3D9606)
ANN00150	Chr1	968562	968940	-	379	0	0.333143	0	0	Similar to PGBD4: PiggyBac transposable element-derived protein 4 (Homo sapiens OX%3D9606)
ANN00151	Chr1	970877	972905	-	2029	0	0	0	0	Protein of unknown function
ANN00152	Chr1	984930	986256	-	1327	0	0	0	0	Protein of unknown function
ANN00153	Chr1	989788	990475	-	688	0	0	0	0	Similar to pif1: ATP-dependent DNA helicase pif1 (Psychrobacter sp. (strain PRwf-1) OX%3D349106)
ANN00154	Chr1	990856	992571	-	1716	0.204877	0.159753	0.0283531	0	Protein of unknown function
ANN00155	Chr1	994003	995248	-	1246	0.0942773	0	0.17538	0.129775	Similar to pol: Retrovirus-related Pol polyprotein from transposon opus (Drosophila melanogaster OX%3D7227)
ANN00156	Chr1	997282	1002058	-	4777	0.0613117	0.0580604	0.0457178	0.037256	Similar to RTase: Probable RNA-directed DNA polymerase from transposon BS (Drosophila melanogaster OX%3D7227)
ANN00157	Chr1	1015594	1017561	-	1968	0.196512	0.350064	0.420277	0.727185	Protein of unknown function
ANN00158	Chr1	1018322	1018553	-	232	0.40569	0	0	0	Protein of unknown function
ANN00159	Chr1	1024739	1029327	-	4589	0.306462	0.28718	0.223205	0.234199	Protein of unknown function
ANN00160	Chr1	1031049	1032712	-	1664	0	0	0.124128	0.320988	Protein of unknown function
ANN00161	Chr1	1032841	1033675	-	835	0.351109	0	0.349824	0	Protein of unknown function
ANN00162	Chr1	1044062	1046706	-	2645	0	0	0	0	Similar to X-element\ORF2: Probable RNA-directed DNA polymerase from transposon X-element (Drosophila melanogaster OX%3D7227)
ANN00163	Chr1	1047106	1049453	-	2348	0	0	0.103591	0	Similar to ORF1: Nucleic-acid-binding protein from transposon X-element (Drosophila melanogaster OX%3D7227)
ANN00164	Chr1	1053880	1055137	-	1258	0.0745539	0	0.154735	0	Protein of unknown function
ANN00165	Chr1	1056972	1058127	-	1156	0.182761	0	0.0982484	0	Protein of unknown function
ANN00166	Chr1	1086634	1089196	-	2563	0	0.106938	0	0.132515	Similar to ZNF862: Zinc finger protein 862 (Homo sapiens OX%3D9606)
ANN00167	Chr1	1090802	1092048	+	1247	0.18803	0.478446	0.0780505	0	Similar to harbi1: Putative nuclease HARBI1 (Danio rerio OX%3D7955)
ANN00168	Chr1	1098675	1098990	-	316	0	0	0	0	Protein of unknown function
ANN00169	Chr1	1113142	1114953	+	1812	0.116396	0.208605	0.0537001	0.28572	Similar to RTase: Probable RNA-directed DNA polymerase from transposon BS (Drosophila melanogaster OX%3D7227)
ANN00170	Chr1	1116940	1118637	+	1698	0.193556	0.217872	0.114615	0.0785665	Similar to thap1: THAP domain-containing protein 1 (Salmo salar OX%3D8030)
ANN00171	Chr1	1123674	1127827	-	4154	0	0.0178242	0.0507411	0	Similar to CFDP2: Craniofacial development protein 2 (Bos taurus OX%3D9913)
ANN00172	Chr1	1131061	1135542	+	4482	0.085062	0.0965616	0.186297	0.240792	Similar to Sperm acrosomal protein FSA-ACR.1 (Fragment) (Vulpes vulpes OX%3D9627)
ANN00173	Chr1	1137220	1139966	+	2747	0	0	0.0354155	0	Protein of unknown function
ANN00174	Chr1	1140529	1150376	-	9848	0.495617	0.766849	1.21592	1.4874	Similar to K02A2.6: Uncharacterized protein K02A2.6 (Caenorhabditis elegans OX%3D6239)
ANN00175	Chr1	1159537	1160509	+	973	0	0	0.116746	0	Protein of unknown function
ANN00176	Chr1	1179348	1180437	-	1090	0	0	0	0.122431	Protein of unknown function
ANN00177	Chr1	1193957	1194942	+	986	0.309445	0.337982	0.226042	0.361289	Similar to pol: Retrovirus-related Pol polyprotein from transposon opus (Drosophila melanogaster OX%3D7227)
ANN00178	Chr1	1196334	1196964	-	631	0	0	0	0.282436	Protein of unknown function
ANN00179	Chr1	1199608	1203302	+	3695	0.0444592	0.341626	0.11732	2.5875	Similar to GVQW3: Protein GVQW3 (Homo sapiens OX%3D9606)
ANN00180	Chr1	1208135	1215909	+	7775	0.545449	0.129589	1.04244	0.374818	Protein of unknown function
ANN00181	Chr1	1220139	1222133	+	1995	0	0	0	0	Protein of unknown function
ANN00182	Chr1	1222945	1223941	+	997	0.294001	1.49007	1.45991	23.8138	Protein of unknown function
ANN00183	Chr1	1224038	1225554	+	1517	0.479344	0.724873	0.753486	13.0063	Protein of unknown function
ANN00184	Chr1	1226317	1229147	+	2831	0.136586	0.104627	0.0586263	0	Protein of unknown function
ANN00185	Chr1	1232264	1237290	+	5027	0	0	0	0	Similar to Retrovirus-related Pol polyprotein from type-1 retrotransposable element R1 (Fragment) (Bradysia coprophila OX%3D38358)
ANN00186	Chr1	1244776	1245893	+	1118	0	0.198811	0.199329	1.01654	Protein of unknown function
ANN00187	Chr1	1248257	1249121	+	865	0	0.265532	0.0656695	0	Similar to ZBED5: Zinc finger BED domain-containing protein 5 (Bos taurus OX%3D9913)
ANN00188	Chr1	1249294	1249979	+	686	0	1.04835	1.65016	5.56263	Protein of unknown function
ANN00189	Chr1	1275876	1276770	+	895	0.222719	0	0	0	Protein of unknown function
ANN00190	Chr1	1280424	1281802	+	1379	0.114727	0	0.229027	0	Protein of unknown function
ANN00191	Chr1	1282652	1287386	+	4735	2.02705	1.665	2.40616	0.326856	Protein of unknown function
ANN00192	Chr1	1328443	1329874	-	1432	0	0	0	0.0465854	Protein of unknown function
ANN00193	Chr1	1333440	1335814	-	2375	0.306102	0.557968	0.22533	0.180381	Similar to PGBD3: PiggyBac transposable element-derived protein 3 (Homo sapiens OX%3D9606)
ANN00194	Chr1	1341143	1341428	-	286	0	0	0	0	Similar to tc3a: Transposable element Tc3 transposase (Caenorhabditis elegans OX%3D6239)
ANN00195	Chr1	1341662	1344529	-	2868	0.0367618	0.06448	0.0678416	0	Similar to Transposable element Tcb2 transposase (Caenorhabditis briggsae OX%3D6238)
ANN00196	Chr1	1347891	1352057	-	4167	0.0365823	0.328654	0.228419	0.0761403	Protein of unknown function
ANN00197	Chr1	1352360	1353399	-	1040	0.248121	0	0.210152	0.31101	Protein of unknown function
ANN00198	Chr1	1353483	1354661	-	1179	0.218844	0	0.0926775	0	Protein of unknown function
ANN00199	Chr1	1362803	1363835	-	1033	1.11878	0.910659	0.200024	0.315294	Similar to GTF2IRD2: General transcription factor II-I repeat domain-containing protein 2 (Bos taurus OX%3D9913)
ANN00200	Chr1	1363880	1367341	-	3462	0.0575298	0.117578	0.126461	0.121436	Similar to GTF2IRD2: General transcription factor II-I repeat domain-containing protein 2 (Bos taurus OX%3D9913)
ANN00201	Chr1	1365179	1366247	+	1069	0	0	0	0	Similar to tc3a: Transposable element Tc3 transposase (Caenorhabditis elegans OX%3D6239)
ANN00202	Chr1	1373562	1375040	-	1479	2.26769	21.7171	1.74311	15.7843	Similar to R1A1-element\ORF2: Putative 115 kDa protein in type-1 retrotransposable element R1DM (Drosophila melanogaster OX%3D7227)
ANN00203	Chr1	1430622	1434002	-	3381	0.0311823	0	0	0.15793	Similar to RTase: Probable RNA-directed DNA polymerase from transposon BS (Drosophila melanogaster OX%3D7227)
ANN00204	Chr1	1434204	1443363	-	9160	0.136975	0.571253	0.0902113	0.493062	Similar to Mctp: Multiple C2 and transmembrane domain-containing protein (Drosophila melanogaster OX%3D7227)
ANN00205	Chr1	1452594	1454914	+	2321	0.0454294	0	0	0.0696421	Similar to pip1: RING-box protein pip1 (Schizosaccharomyces pombe (strain 972 / ATCC 24843) OX%3D284812)
ANN00206	Chr1	1466349	1468639	-	2291	0.0434739	0	0	0.0705545	Protein of unknown function
ANN00207	Chr1	1497219	1502856	-	5638	0.189203	1.75137	0.107753	0.27639	Protein of unknown function
ANN00208	Chr1	1504160	1505213	-	1054	0	0	0	0	Protein of unknown function
ANN00209	Chr1	1506395	1509222	-	2828	0	0.104738	0	0.0471621	Protein of unknown function
ANN00210	Chr1	1542922	1544094	+	1173	0	0.126321	0	0	Protein of unknown function
ANN00211	Chr1	1545523	1546605	+	1083	0.221929	0.465538	0.1009	0	Protein of unknown function
ANN00212	Chr1	1570671	1571271	+	601	0	0	0	0	Protein of unknown function
ANN00213	Chr1	1572560	1576463	-	3904	0	0.0796291	0.0279718	0.0413963	Similar to Cfap57: Cilia- and flagella-associated protein 57 (Mus musculus OX%3D10090)
ANN00214	Chr1	1593080	1595437	+	2358	0.0497986	0.078432	0	0.109766	Similar to PGBD3: PiggyBac transposable element-derived protein 3 (Homo sapiens OX%3D9606)
ANN00215	Chr1	1599817	1601263	+	1447	0.0648093	1.09563	0.18497	0.444216	Similar to K02A2.6: Uncharacterized protein K02A2.6 (Caenorhabditis elegans OX%3D6239)
ANN00216	Chr1	1602962	1604717	+	1756	0.0533985	0.552692	0.203193	1.95611	Protein of unknown function
ANN00217	Chr1	1605028	1607959	+	2932	0.0319735	0.170482	0.341405	1.81713	Similar to Retrovirus-related Pol polyprotein from type-1 retrotransposable element R1 (Fragment) (Bradysia coprophila OX%3D38358)
ANN00218	Chr1	1609152	1611291	+	2140	0.586377	1.70387	0.609606	0.291035	Similar to HARBI1: Putative nuclease HARBI1 (Bos taurus OX%3D9913)
ANN00219	Chr1	1620317	1621202	-	886	0.330875	0.104443	0.246721	0	Similar to pol: RNA-directed DNA polymerase from mobile element jockey (Drosophila melanogaster OX%3D7227)
ANN00220	Chr1	1621692	1623664	-	1973	0.267382	0.608052	0.115088	0.0902305	Protein of unknown function
ANN00221	Chr1	1627059	1629099	-	2041	0.0516648	0.13593	0.0953441	0	Protein of unknown function
ANN00222	Chr1	1630484	1631594	-	1111	0.812734	0.0666882	0.613294	0	Protein of unknown function
ANN00223	Chr1	1632301	1632790	-	490	0	0	0	0	Protein of unknown function
ANN00224	Chr1	1632846	1634549	-	1704	0	0.0869335	0	0.0782897	Protein of unknown function
ANN00225	Chr1	1643795	1644845	+	1051	1.04852	0	0.90265	0.29644	Similar to Retrovirus-related Pol polyprotein from type-1 retrotransposable element R1 (Fragment) (Bradysia coprophila OX%3D38358)
ANN00226	Chr1	1644913	1649209	+	4297	0.155458	0.0516926	0.455889	0.0752187	Similar to Retrovirus-related Pol polyprotein from type-1 retrotransposable element R1 (Fragment) (Bradysia coprophila OX%3D38358)
ANN00227	Chr1	1648237	1648885	-	649	0	0	0	0	Similar to GVQW3: Protein GVQW3 (Homo sapiens OX%3D9606)
ANN00228	Chr1	1654484	1655251	-	768	0	0	0.063397	0	Protein of unknown function
ANN00229	Chr1	1656228	1658328	+	2101	0.156412	0.193779	0.04631	0.133703	Protein of unknown function
ANN00230	Chr1	1662898	1665814	-	2917	0.466173	0.242342	0.427863	1.59482	Protein of unknown function
ANN00231	Chr1	1671452	1672382	-	931	0.605288	0.159191	0.400363	0.634187	Protein of unknown function
ANN00232	Chr1	1699545	1701186	+	1642	0	0	0	0	Protein of unknown function
ANN00233	Chr1	1701304	1702078	+	775	0	0	0.293222	0	Protein of unknown function
ANN00234	Chr1	1702122	1705420	+	3299	0	0	0.172039	0	Similar to PIF1: ATP-dependent DNA helicase PIF1 (Saccharomyces cerevisiae (strain ATCC 204508 / S288c) OX%3D559292)
ANN00235	Chr1	1707955	1708288	+	334	0.63301	0	0.819625	5.62016	Protein of unknown function
ANN00236	Chr1	1708347	1708893	+	547	0.171638	0.27115	0.764016	0.295915	Protein of unknown function
ANN00237	Chr1	1715066	1718299	-	3234	1.87022	6.94078	1.36361	2.8559	Similar to TIGD6: Tigger transposable element-derived protein 6 (Homo sapiens OX%3D9606)
ANN00238	Chr1	1718438	1724500	-	6063	0.156526	0.115973	0.0357455	0.142302	Protein of unknown function
ANN00239	Chr1	1719275	1719650	+	376	0	0	0	0	Similar to Tf2-6: Transposon Tf2-6 polyprotein (Schizosaccharomyces pombe (strain 972 / ATCC 24843) OX%3D284812)
ANN00240	Chr1	1719702	1721509	+	1808	0	0	0	0	Similar to K02A2.6: Uncharacterized protein K02A2.6 (Caenorhabditis elegans OX%3D6239)
ANN00241	Chr1	1721587	1721896	+	310	0	0	0	0	Protein of unknown function
ANN00242	Chr1	1743506	1745660	-	2155	0	0	0.150513	0	Similar to X-element\ORF2: Probable RNA-directed DNA polymerase from transposon X-element (Drosophila melanogaster OX%3D7227)
ANN00243	Chr1	1748178	1749633	+	1456	1.08007	0.203502	0.350585	0.0916339	Similar to ZBED1: Zinc finger BED domain-containing protein 1 (Homo sapiens OX%3D9606)
ANN00244	Chr1	1762785	1764917	+	2133	0.533388	0.604217	0.594137	0.289886	Similar to HARBI1: Putative nuclease HARBI1 (Bos taurus OX%3D9913)
ANN00245	Chr1	1769117	1769495	-	379	0	0	0	0	Protein of unknown function
ANN00246	Chr1	1775512	1777498	+	1987	0	0.167629	0.0549719	0	Similar to JRKL: Jerky protein homolog-like (Homo sapiens OX%3D9606)
ANN00247	Chr1	1779428	1782170	-	2743	0.158228	1.05583	0.168299	0	Similar to jockey\pol: RNA-directed DNA polymerase from mobile element jockey (Drosophila funebris OX%3D7221)
ANN00248	Chr1	1783958	1784678	+	721	0	0	0	0	Protein of unknown function
ANN00249	Chr1	1785015	1786590	-	1576	0.107983	0	0.421991	0.225949	Similar to GIP: Copia protein (Drosophila melanogaster OX%3D7227)
ANN00250	Chr1	1787070	1787679	+	610	0.346129	2.75856	0.714347	0.717002	Protein of unknown function
ANN00251	Chr1	1787721	1788951	+	1231	0	0	0	0	Similar to PGBD3: PiggyBac transposable element-derived protein 3 (Homo sapiens OX%3D9606)
ANN00252	Chr1	1789604	1793058	-	3455	1.53379	1.56241	1.06528	0.974468	Similar to Retrovirus-related Pol polyprotein from transposon TNT 1-94 (Nicotiana tabacum OX%3D4097)
ANN00253	Chr1	1793953	1794196	+	244	0	0	0	0	Protein of unknown function
ANN00254	Chr1	1799005	1802735	+	3731	0.0282563	0.392931	0.168333	0.371196	Protein of unknown function
ANN00255	Chr1	1805408	1807837	-	2430	0	0	0	0	Protein of unknown function
ANN00256	Chr1	1808513	1811119	+	2607	0.633993	1.31349	0.410161	1.42898	Similar to Jrkl: Jerky protein homolog-like (Mus musculus OX%3D10090)
ANN00257	Chr1	1812554	1814084	-	1531	0.0612512	0.0483816	0.286066	0.130713	Similar to PGBD3: PiggyBac transposable element-derived protein 3 (Homo sapiens OX%3D9606)
ANN00258	Chr1	1819955	1824151	-	4197	0	0	0	0	Protein of unknown function
ANN00259	Chr1	1820619	1823306	+	2688	0	0	0	0	Protein of unknown function
ANN00260	Chr1	1824029	1826370	+	2342	0.180087	0	0.0415425	0.0345087	Protein of unknown function
ANN00261	Chr1	1840533	1841753	-	1221	0	0.151528	0.089487	0.702007	Similar to K02A2.6: Uncharacterized protein K02A2.6 (Caenorhabditis elegans OX%3D6239)
ANN00262	Chr1	1841801	1843290	-	1490	0.0707832	0.0497138	0.251504	0.0597497	Similar to pol: Retrovirus-related Pol polyprotein from transposon 297 (Drosophila melanogaster OX%3D7227)
ANN00263	Chr1	1843386	1845000	+	1615	0.0290317	0	0.13795	0	Protein of unknown function
ANN00264	Chr1	1859667	1862250	+	2584	0	0	0	0	Similar to Retrovirus-related Pol polyprotein from type-1 retrotransposable element R2 (Fragment) (Nasonia vitripennis OX%3D7425)
ANN00265	Chr1	1863272	1864964	-	1693	0	0	0	0	Protein of unknown function
ANN00266	Chr1	1870704	1873540	+	2837	0.0744321	0.0888067	0.0342916	0.796396	Similar to pol: Retrovirus-related Pol polyprotein from transposon opus (Drosophila melanogaster OX%3D7227)
ANN00267	Chr1	1876435	1882672	-	6238	0.080845	0.0914015	0.115573	0.399711	Similar to PGBD3: PiggyBac transposable element-derived protein 3 (Homo sapiens OX%3D9606)
ANN00268	Chr1	1884796	1885371	+	576	0.162981	0.752509	0.359	1.41276	Protein of unknown function
ANN00269	Chr1	1887350	1887905	+	556	0	0	0.175227	1.0118	Protein of unknown function
ANN00270	Chr1	1887967	1888492	+	526	0.53551	0	0.293313	0	Protein of unknown function
ANN00271	Chr1	1892044	1892419	+	376	0	0.789588	0.259336	2.98429	Protein of unknown function
ANN00272	Chr1	1897501	1898197	-	697	0	0	0.470578	0	Protein of unknown function
ANN00273	Chr1	1898395	1901800	-	3406	0.175428	0.054292	0.161578	0.0474507	Similar to jockey\pol: RNA-directed DNA polymerase from mobile element jockey (Drosophila funebris OX%3D7221)
ANN00274	Chr1	1902860	1906830	+	3971	0.0530963	0.1743	0.187269	0.0539325	Similar to PGBD3: PiggyBac transposable element-derived protein 3 (Homo sapiens OX%3D9606)
ANN00275	Chr1	1907385	1908123	+	739	0.301858	0.371241	0.575574	0	Protein of unknown function
ANN00276	Chr1	1908161	1908731	+	571	0.164411	0.480659	1.93971	1.34733	Similar to PGBD3: PiggyBac transposable element-derived protein 3 (Homo sapiens OX%3D9606)
ANN00277	Chr1	1909149	1909588	+	440	0.133685	0	0	0	Protein of unknown function
ANN00278	Chr1	1909632	1911403	-	1772	0.0994143	0.0835955	0.0274565	0.229344	Protein of unknown function
ANN00279	Chr1	1914808	1915051	-	244	0	0	1.33418	0	Protein of unknown function
ANN00280	Chr1	1922591	1924697	+	2107	0	0	0.611219	0.108373	Similar to PGBD4: PiggyBac transposable element-derived protein 4 (Homo sapiens OX%3D9606)
ANN00281	Chr1	1926222	1929802	+	3581	0.0997779	0.134346	0.157734	0.0902624	Protein of unknown function
ANN00282	Chr1	1929864	1932755	+	2892	0	0.392957	0.110654	0.0615478	Protein of unknown function
ANN00283	Chr1	1938977	1953773	+	14797	0.150913	0.403512	0.303662	0.234334	Similar to Jrkl: Jerky protein homolog-like (Mus musculus OX%3D10090)
ANN00284	Chr1	1958269	1959299	+	1031	0	0	0.110172	0.129444	Protein of unknown function
ANN00285	Chr1	1966262	1966781	-	520	2.75506	2.81634	1.46694	0.256893	Similar to ZBED1: Zinc finger BED domain-containing protein 1 (Homo sapiens OX%3D9606)
ANN00286	Chr1	1967165	1968611	-	1447	0.15406	0.102384	0.0672552	0	Similar to ZBED6: Zinc finger BED domain-containing protein 6 (Homo sapiens OX%3D9606)
ANN00287	Chr1	1974766	1976537	+	1772	0	0	0	0	Similar to PA: Polymerase acidic protein (Quaranfil virus (isolate QrfV/Tick/Afghanistan/EG_T_377/1968) OX%3D1559362)
ANN00288	Chr1	1976686	1977386	+	701	0	0	0	0	Protein of unknown function
ANN00289	Chr1	1977751	1981708	+	3958	0.0414667	0.0392712	0	0	Similar to pol: Retrovirus-related Pol polyprotein from type-2 retrotransposable element R2DM (Drosophila melanogaster OX%3D7227)
ANN00290	Chr1	2038447	2038986	+	540	0.173867	0	0	0	Protein of unknown function
ANN00291	Chr1	2043683	2044016	+	334	0.597929	0.889175	0.58409	2.09856	Protein of unknown function
ANN00292	Chr1	2044065	2045988	+	1924	0.0548082	0.0961333	0.967187	2.28227	Similar to pol: RNA-directed DNA polymerase from mobile element jockey (Drosophila melanogaster OX%3D7227)
ANN00293	Chr1	2055565	2057748	+	2184	0.0537678	0.135637	0.395078	0.460898	Similar to ERCC6: Chimeric ERCC6-PGBD3 protein (Homo sapiens OX%3D9606)
ANN00294	Chr1	2063176	2065879	+	2704	0.021712	0	0	0	Protein of unknown function
ANN00295	Chr1	2077233	2082028	+	4796	0.332329	0.0440066	0.19179	0.542654	Similar to PGBD3: PiggyBac transposable element-derived protein 3 (Homo sapiens OX%3D9606)
ANN00296	Chr1	2083329	2084823	+	1495	0.439202	0	0.43911	0	Protein of unknown function
ANN00297	Chr1	2085322	2086795	+	1474	0.0636214	0.125502	0	0	Protein of unknown function
ANN00298	Chr1	2087026	2087437	+	412	0	0	0	0	Protein of unknown function
ANN00299	Chr1	2091154	2091742	+	589	0	0	0	0	Similar to ORF1: Nucleic-acid-binding protein from transposon X-element (Drosophila melanogaster OX%3D7227)
ANN00300	Chr1	2092090	2094424	+	2335	0	0	0	0	Similar to X-element\ORF2: Probable RNA-directed DNA polymerase from transposon X-element (Drosophila melanogaster OX%3D7227)
ANN00301	Chr1	2094803	2100136	+	5334	0.264722	0.305413	0.214192	0.191778	Similar to Transposable element Tcb2 transposase (Caenorhabditis briggsae OX%3D6238)
ANN00302	Chr1	2102170	2104501	+	2332	0.12061	0.0540231	0.180805	0.311182	Similar to jockey\pol: RNA-directed DNA polymerase from mobile element jockey (Drosophila funebris OX%3D7221)
ANN00303	Chr1	2105769	2107656	+	1888	0	0.0784567	0	0	Similar to 1a: Replicase polyprotein 1a (Human coronavirus HKU1 (isolate N1) OX%3D443239)
ANN00304	Chr1	2109843	2110957	-	1115	0.141916	0.0565206	0.101864	0	Protein of unknown function
ANN00305	Chr1	2161931	2190892	-	28962	0.305984	0.803636	0.364038	0.748385	Similar to Arel1: Apoptosis-resistant E3 ubiquitin protein ligase 1 (Mus musculus OX%3D10090)
ANN00306	Chr1	2201990	2202992	+	1003	26.829	18.5965	36.5993	22.4435	Similar to wol: Dolichyl-phosphate beta-glucosyltransferase (Drosophila melanogaster OX%3D7227)
ANN00307	Chr1	2206621	2225626	+	19006	1.73782	1.17849	2.16376	0.801823	Similar to mars1: Methionine--tRNA ligase%2C cytoplasmic (Xenopus laevis OX%3D8355)
ANN00308	Chr1	2235941	2238387	+	2447	4.92506	2.73487	6.38862	2.39779	Similar to Ddx28: Probable ATP-dependent RNA helicase DDX28 (Mus musculus OX%3D10090)
ANN00309	Chr1	2240597	2243429	+	2833	1.5769	0.825694	1.24863	0.847663	Similar to Ddx28: Probable ATP-dependent RNA helicase DDX28 (Mus musculus OX%3D10090)
ANN00310	Chr1	2245582	2246004	+	423	2.11048	0.149204	2.74688	2.17398	Protein of unknown function
ANN00311	Chr1	2258535	2259783	+	1249	0.169142	0	0.272781	0.323657	Protein of unknown function
ANN00312	Chr1	2263686	2264395	+	710	0.132178	0	0	0.18805	Protein of unknown function
ANN00313	Chr1	2264419	2264887	+	469	0	0	0	0	Protein of unknown function
ANN00314	Chr1	2265263	2266027	+	765	0.276295	0.261717	0.074265	0	Protein of unknown function
ANN00315	Chr1	2271825	2272623	-	799	0	0.343328	0.13681	0	Similar to JRKL: Jerky protein homolog-like (Homo sapiens OX%3D9606)
ANN00316	Chr1	2279495	2280848	+	1354	0	0	0.0806904	0	Similar to GTF2IRD2: General transcription factor II-I repeat domain-containing protein 2A (Homo sapiens OX%3D9606)
ANN00317	Chr1	2281016	2284894	+	3879	0.0574449	0.0324724	0.109534	0.214582	Similar to PGBD3: PiggyBac transposable element-derived protein 3 (Homo sapiens OX%3D9606)
ANN00318	Chr1	2288374	2290710	-	2337	0.270837	0	0.278993	0.26457	Protein of unknown function
ANN00319	Chr1	2292774	2293472	+	699	0.134261	0	0.603805	0.454442	Similar to PGBD4: PiggyBac transposable element-derived protein 4 (Homo sapiens OX%3D9606)
ANN00320	Chr1	2297704	2299269	+	1566	0.269573	0.283798	0.0621412	0.216936	Similar to Jrkl: Jerky protein homolog-like (Mus musculus OX%3D10090)
ANN00321	Chr1	2300419	2301481	+	1063	0.0992431	0	0.106852	0	Protein of unknown function
ANN00322	Chr1	2301612	2302146	+	535	0	0	0	0	Protein of unknown function
ANN00323	Chr1	2318753	2319505	-	753	0	0	0	0	Protein of unknown function
ANN00324	Chr1	2331348	2335059	-	3712	0	0	0	0	Similar to X-element\ORF2: Probable RNA-directed DNA polymerase from transposon X-element (Drosophila melanogaster OX%3D7227)
ANN00326	Chr1	2346653	2348457	+	1805	0.110372	0.110838	0.269298	0.0739065	Protein of unknown function
ANN00327	Chr1	2348487	2349065	+	579	0	0.217868	0.560908	0	Protein of unknown function
ANN00328	Chr1	2349262	2351666	+	2405	0.0878076	0	0.173525	0	Protein of unknown function
ANN00329	Chr1	2351714	2352793	+	1080	0.184532	0.171329	0.405636	0.314647	Similar to JRKL: Jerky protein homolog-like (Homo sapiens OX%3D9606)
ANN00330	Chr1	2356298	2356670	+	373	0	0	0	0	Protein of unknown function
ANN00331	Chr1	2357776	2358097	+	322	0	0.392299	0.302963	0	Protein of unknown function
ANN00332	Chr1	2358329	2359646	-	1318	0	0	0	0	Similar to RTase: Probable RNA-directed DNA polymerase from transposon BS (Drosophila melanogaster OX%3D7227)
ANN00333	Chr1	2365102	2365660	+	559	0.188882	0	0	0	Protein of unknown function
ANN00334	Chr1	2367559	2369401	+	1843	0	0	0	0	Similar to GTF2IRD2: General transcription factor II-I repeat domain-containing protein 2 (Bos taurus OX%3D9913)
ANN00335	Chr1	2369852	2372218	-	2367	0.401025	1.00829	0.294605	0.724172	Similar to RTase: Probable RNA-directed DNA polymerase from transposon BS (Drosophila melanogaster OX%3D7227)
ANN00336	Chr1	2375231	2377187	+	1957	0.27248	0.215758	0	0.245917	Protein of unknown function
ANN00337	Chr1	2379105	2379609	-	505	0.185941	0.183397	0.0964791	0	Protein of unknown function
ANN00338	Chr1	2380867	2381559	-	693	0	0	0.157766	0.4498	Protein of unknown function
ANN00339	Chr1	2386232	2390166	+	3935	0.105717	0	0.0555029	0.195152	Similar to X-element\ORF2: Probable RNA-directed DNA polymerase from transposon X-element (Drosophila melanogaster OX%3D7227)
ANN00340	Chr1	2398356	2400913	+	2558	0.0459035	0.894626	0.0443789	0.026071	Protein of unknown function
ANN00341	Chr1	2406005	2409696	+	3692	0	0	0	0	Protein of unknown function
ANN00342	Chr1	2425908	2427963	+	2056	0.0256438	0	0.107299	0.0393114	Similar to PGBD4: PiggyBac transposable element-derived protein 4 (Homo sapiens OX%3D9606)
ANN00343	Chr1	2447494	2450044	+	2551	0.119414	0.377223	0.27969	0.860454	Similar to TY3B-G: Transposon Ty3-G Gag-Pol polyprotein (Saccharomyces cerevisiae (strain ATCC 204508 / S288c) OX%3D559292)
ANN00344	Chr1	2451246	2455965	+	4720	0.129119	0.229805	0.320144	0.554872	Protein of unknown function
ANN00345	Chr1	2461216	2461769	-	554	0	0.133859	0.175861	0	Protein of unknown function
ANN00346	Chr1	2465963	2468938	-	2976	0.137782	0.0746459	0.0653788	0.029905	Similar to THAP9: DNA transposase THAP9 (Homo sapiens OX%3D9606)
ANN00347	Chr1	2469565	2472925	-	3361	0.0941037	0.0374786	0.18204	0.581041	Similar to RTase: Probable RNA-directed DNA polymerase from transposon BS (Drosophila melanogaster OX%3D7227)
ANN00348	Chr1	2474257	2475011	-	755	0.12429	0.0981749	0	0	Protein of unknown function
ANN00349	Chr1	2475068	2478588	-	3521	0	0	0	0	Similar to ZNF862: Zinc finger protein 862 (Homo sapiens OX%3D9606)
ANN00350	Chr1	2477308	2478802	+	1495	0	0	0	0	Similar to ZNF862: Zinc finger protein 862 (Homo sapiens OX%3D9606)
ANN00351	Chr1	2483930	2485825	+	1896	0.964372	1.73169	0.361017	0.610199	Protein of unknown function
ANN00352	Chr1	2487235	2491794	-	4560	0.422889	0.842864	0.357749	0.145348	Protein of unknown function
ANN00353	Chr1	2493050	2494382	-	1333	0.215453	1.42214	0.170386	0	Protein of unknown function
ANN00354	Chr1	2495266	2498533	-	3268	0.222478	0.369254	0.141912	0.314874	Similar to GTF2IRD2: General transcription factor II-I repeat domain-containing protein 2 (Bos taurus OX%3D9913)
ANN00355	Chr1	2498920	2500991	-	2072	0.0961422	0.0714861	0	0.0643782	Protein of unknown function
ANN00356	Chr1	2502428	2504378	-	1951	0.336734	0.189604	0.157938	0.339817	Similar to X-element\ORF2: Probable RNA-directed DNA polymerase from transposon X-element (Drosophila melanogaster OX%3D7227)
ANN00357	Chr1	2505510	2505993	-	484	0.0970127	0.13036	0	0	Protein of unknown function
ANN00358	Chr1	2506938	2507130	-	193	0	0	0.506515	0	Protein of unknown function
ANN00359	Chr1	2508934	2510647	-	1714	0.30099	0.28077	0.319239	0.103873	Protein of unknown function
ANN00360	Chr1	2511001	2513041	-	2041	2.12933	2.52378	0.951548	0.170313	Similar to Retrovirus-related Pol polyprotein from transposon TNT 1-94 (Nicotiana tabacum OX%3D4097)
ANN00361	Chr1	2518079	2518529	-	451	0.234214	0	0.242609	0	Protein of unknown function
ANN00362	Chr1	2524082	2525436	+	1355	0.0692129	0.0465022	0.304911	0.316266	Protein of unknown function
ANN00363	Chr1	2526692	2527328	-	637	0	0	0	0	Protein of unknown function
ANN00364	Chr1	2530330	2530668	+	339	0	0	0	0	Protein of unknown function
ANN00365	Chr1	2532593	2533475	+	883	1.02249	2.02162	0.459444	0.151165	Similar to GIP: Copia protein (Drosophila melanogaster OX%3D7227)
ANN00366	Chr1	2534820	2535084	+	265	0	0	0	0	Protein of unknown function
ANN00367	Chr1	2541389	2544018	-	2630	0.0712927	0.0957991	0	0.025357	Similar to jockey\pol: RNA-directed DNA polymerase from mobile element jockey (Drosophila funebris OX%3D7221)
ANN00368	Chr1	2544071	2545898	-	1828	0	0.0689261	0.062111	0	Protein of unknown function
ANN00369	Chr1	2547333	2552009	+	4677	0.0727431	0.330045	0.10746	0.034553	Protein of unknown function
ANN00370	Chr1	2553639	2555670	+	2032	0.0750379	0.37548	0.0279362	0.167161	Similar to pol: Retrovirus-related Pol polyprotein from transposon 297 (Drosophila melanogaster OX%3D7227)
ANN00371	Chr1	2556969	2557419	+	451	0	0.328995	0.216113	0	Protein of unknown function
ANN00372	Chr1	2557996	2561392	-	3397	0.0691256	0	0.0964436	0	Similar to harbi1: Putative nuclease HARBI1 (Danio rerio OX%3D7955)
ANN00373	Chr1	2564045	2565107	-	1063	0	0	0	0	Protein of unknown function
ANN00374	Chr1	2565806	2570745	-	4940	0	0.0149876	0	0	Protein of unknown function
ANN00375	Chr1	2574591	2575032	-	442	0	0.31063	0	0	Protein of unknown function
ANN00376	Chr1	2578927	2582761	-	3835	0.0948074	0	0.273679	0.827465	Protein of unknown function
ANN00377	Chr1	2595520	2596969	+	1450	5.10187	10.4667	0.96964	1.13646	Similar to Pol: LINE-1 retrotransposable element ORF2 protein (Mus musculus OX%3D10090)
ANN00378	Chr1	2601451	2602063	-	613	0.19179	0	0.47672	0.217855	Protein of unknown function
ANN00379	Chr1	2605706	2606342	+	637	0.0736748	0.290667	0.637154	0.25404	Protein of unknown function
ANN00380	Chr1	2608506	2608884	+	379	0.278826	0	0.300203	0.235363	Protein of unknown function
ANN00381	Chr1	2609551	2610154	-	604	0	0	0	0	Protein of unknown function
ANN00382	Chr1	2612819	2614483	-	1665	0.126857	0	0.396834	0	Protein of unknown function
ANN00383	Chr1	2615944	2617775	+	1832	0.051182	0	0.212454	0.194358	Similar to ZBED1: Zinc finger BED domain-containing protein 1 (Homo sapiens OX%3D9606)
ANN00384	Chr1	2618594	2620828	+	2235	0.131076	0	0	0	Similar to Zbed4: Zinc finger BED domain-containing protein 4 (Mus musculus OX%3D10090)
ANN00385	Chr1	2621179	2622475	+	1297	0.0723104	0	0	0	Similar to ERCC6: Chimeric ERCC6-PGBD3 protein (Homo sapiens OX%3D9606)
ANN00386	Chr1	2628098	2630670	-	2573	0.0819566	0.0489611	0	0.051838	Similar to Pogk: Pogo transposable element with KRAB domain (Mus musculus OX%3D10090)
ANN00387	Chr1	2641963	2644471	+	2509	0	0	0.0879185	0	Similar to PGBD4: PiggyBac transposable element-derived protein 4 (Homo sapiens OX%3D9606)
ANN00388	Chr1	2645883	2646528	+	646	0.0817025	0	0.150777	0.125248	Similar to PGBD4: PiggyBac transposable element-derived protein 4 (Homo sapiens OX%3D9606)
ANN00389	Chr1	2649298	2650798	+	1501	0	0	0.226954	0	Protein of unknown function
ANN00390	Chr1	2651733	2655038	+	3306	0.223454	0.127692	0.235137	0.0403411	Protein of unknown function
ANN00391	Chr1	2655066	2655677	+	612	0.172498	0	0	0	Protein of unknown function
ANN00392	Chr1	2675193	2678092	+	2900	0.153688	0.145575	0.215101	0.0459908	Similar to F52C9.6: Putative uncharacterized transposon-derived protein F52C9.6 (Caenorhabditis elegans OX%3D6239)
ANN00393	Chr1	2678866	2679292	-	427	2.06219	2.98127	2.65745	3.15879	Protein of unknown function
ANN00394	Chr1	2679625	2680252	-	628	0.317561	1.26276	0.465316	1.93352	Protein of unknown function
ANN00395	Chr1	2687461	2689172	+	1712	0	0	0.127614	0	Protein of unknown function
ANN00396	Chr1	2689651	2691454	-	1804	0	0	0.0605514	0.134417	Protein of unknown function
ANN00397	Chr1	2693260	2693947	-	688	0	0	0	0	Protein of unknown function
ANN00398	Chr1	2694048	2695929	-	1882	0	0	0	0	Similar to RTase: Probable RNA-directed DNA polymerase from transposon BS (Drosophila melanogaster OX%3D7227)
ANN00399	Chr1	2705574	2707742	-	2169	0.0972289	0.136575	0.104683	0.0745248	Protein of unknown function
ANN00400	Chr1	2710768	2713104	+	2337	0.100492	0.0633766	0.201233	0.26457	Protein of unknown function
ANN00401	Chr1	2713948	2715378	-	1431	0.0820806	0.0440307	0.0763455	0.12443	Similar to HARBI1: Putative nuclease HARBI1 (Homo sapiens OX%3D9606)
ANN00402	Chr1	2735924	2738284	+	2361	0.193865	0.542698	0.229895	0.143858	Similar to Zbed4: Zinc finger BED domain-containing protein 4 (Mus musculus OX%3D10090)
ANN00403	Chr1	2743698	2746532	+	2835	0	0	0	0	Similar to Ogfr: Opioid growth factor receptor (Mus musculus OX%3D10090)
ANN00404	Chr1	2750760	2751610	+	851	0.0690442	0	0	0	Protein of unknown function
ANN00405	Chr1	2751676	2752738	+	1063	0.0882432	0	0	0	Protein of unknown function
ANN00406	Chr1	2753064	2754327	+	1264	0	0	0	0	Similar to R1A1-element\ORF1: Uncharacterized 50 kDa protein in type I retrotransposable element R1DM (Drosophila melanogaster OX%3D7227)
ANN00407	Chr1	2754486	2755524	+	1039	0.113078	0	0	0	Protein of unknown function
ANN00408	Chr1	2758500	2760955	+	2456	0	0	0	0	Similar to RTase: Probable RNA-directed DNA polymerase from transposon BS (Drosophila melanogaster OX%3D7227)
ANN00409	Chr1	2770844	2772756	+	1913	0	0	0.0508635	0	Similar to SETMAR: Histone-lysine N-methyltransferase SETMAR (Homo sapiens OX%3D9606)
ANN00410	Chr1	2779092	2783272	+	4181	0.243831	0	0.0271476	0	Protein of unknown function
ANN00411	Chr1	2784117	2785522	+	1406	0	0.105372	0	0	Protein of unknown function
ANN00412	Chr1	2809843	2811471	+	1629	0.316705	0	0.136763	0.198489	Protein of unknown function
ANN00413	Chr1	2811504	2812351	+	848	0	0	0	0	Protein of unknown function
ANN00414	Chr1	2812945	2814395	+	1451	0.299214	0.0510509	0.344751	0.178427	Protein of unknown function
ANN00415	Chr1	2826312	2827404	+	1093	0	0	0.0999763	0	Protein of unknown function
ANN00416	Chr1	2832065	2832344	+	280	0	0	0	0	Protein of unknown function
ANN00417	Chr1	2838363	2841015	+	2653	0	0.164676	0.07946	0.0609237	Similar to TTLL6: Tubulin polyglutamylase TTLL6 (Homo sapiens OX%3D9606)
ANN00418	Chr1	2842563	2845115	+	2553	0.110166	0.116025	0.0444659	0	Similar to Transposable element Tcb2 transposase (Caenorhabditis briggsae OX%3D6238)
ANN00419	Chr1	2866573	2870474	+	3902	0.363666	0.210596	0.342027	0.113968	Similar to Zswim3: Zinc finger SWIM domain-containing protein 3 (Mus musculus OX%3D10090)
ANN00420	Chr1	2872346	2877528	+	5183	1.29582	1.6554	1.94806	0.259772	Similar to PGBD3: PiggyBac transposable element-derived protein 3 (Homo sapiens OX%3D9606)
ANN00421	Chr1	2889889	2895118	-	5230	0.219653	0.0361239	0.334603	0.155352	Similar to Jrkl: Jerky protein homolog-like (Mus musculus OX%3D10090)
ANN00422	Chr1	2895629	2897404	-	1776	0.280699	0.500003	0.73269	1.41625	Protein of unknown function
ANN00423	Chr1	2899528	2900269	-	742	0.585106	0.698753	0.672305	0.109021	Protein of unknown function
ANN00424	Chr1	2908338	2912810	-	4473	0.0209558	0.0744436	0.025375	0.0478784	Similar to X-element\ORF2: Probable RNA-directed DNA polymerase from transposon X-element (Drosophila melanogaster OX%3D7227)
ANN00425	Chr1	2915470	2918919	-	3450	0.263479	0.865808	0.0927521	0.824998	Protein of unknown function
ANN00426	Chr1	2919628	2921759	-	2132	0.134889	0	0	0	Similar to HARBI1: Putative nuclease HARBI1 (Bos taurus OX%3D9913)
ANN00427	Chr1	2921824	2922211	-	388	0.696715	0	0.533398	0.68903	Protein of unknown function
ANN00428	Chr1	2954457	2955054	-	598	0	0	0	0	Similar to pol: RNA-directed DNA polymerase from mobile element jockey (Drosophila melanogaster OX%3D7227)
ANN00429	Chr1	2957326	2957653	-	328	0.483469	0	0.86756	0	Similar to PGBD4: PiggyBac transposable element-derived protein 4 (Homo sapiens OX%3D9606)
ANN00430	Chr1	2957925	2958420	-	496	2.34334	0	1.48031	0	Similar to LWamide neuropeptides (Hydractinia echinata OX%3D35630)
ANN00431	Chr1	2960434	2963110	-	2677	0.345741	0.660971	0.125608	0.265971	Similar to X-element\ORF2: Probable RNA-directed DNA polymerase from transposon X-element (Drosophila melanogaster OX%3D7227)
ANN00432	Chr1	2972211	2975642	-	3432	0.0171051	0.0863	0.188698	0.0941823	Protein of unknown function
ANN00433	Chr1	2991403	2994124	-	2722	0.254077	0.291122	0.312762	0.377875	Protein of unknown function
ANN00434	Chr1	3000991	3001615	-	625	0	0	0	0	Protein of unknown function
ANN00435	Chr1	3001847	3009304	-	7458	0.0212008	0.0198535	0	0.00893974	Similar to PGBD4: PiggyBac transposable element-derived protein 4 (Homo sapiens OX%3D9606)
ANN00436	Chr1	3009806	3011657	-	1852	0	0.167905	0.294906	0	Similar to K02A2.6: Uncharacterized protein K02A2.6 (Caenorhabditis elegans OX%3D6239)
ANN00437	Chr1	3015655	3017504	-	1850	0.171166	0	0	0	Similar to harbi1: Putative nuclease HARBI1 (Danio rerio OX%3D7955)
ANN00438	Chr1	3017555	3019733	-	2179	0.107783	0.0578182	0.0260507	0	Similar to HARBI1: Putative nuclease HARBI1 (Bos taurus OX%3D9913)
ANN00439	Chr1	3020441	3021382	-	942	0.0995901	0	0.116019	0	Protein of unknown function
ANN00440	Chr1	3021433	3028895	-	7463	0.0329627	0	0.114055	0.0216523	Similar to harbi1: Putative nuclease HARBI1 (Danio rerio OX%3D7955)
ANN00441	Chr1	3051262	3052351	-	1090	0.268893	0	0.102227	0	Similar to PGBD4: PiggyBac transposable element-derived protein 4 (Homo sapiens OX%3D9606)
ANN00442	Chr1	3056429	3057104	-	676	0	0.136937	0.635668	0	Protein of unknown function
ANN00443	Chr1	3064056	3066561	-	2506	0.0374109	0	0.160051	0.246721	Similar to RTase: Probable RNA-directed DNA polymerase from transposon BS (Drosophila melanogaster OX%3D7227)
ANN00444	Chr1	3072423	3073257	+	835	0	0	0	0	Protein of unknown function
ANN00445	Chr1	3074175	3075504	+	1330	0	0.353812	0	0	Protein of unknown function
ANN00446	Chr1	3086307	3088019	-	1713	0.684344	0.428046	0.357275	0.328009	Similar to PGBD4: PiggyBac transposable element-derived protein 4 (Homo sapiens OX%3D9606)
ANN00447	Chr1	3088584	3090575	+	1992	0.344235	0.397665	0.268181	0.927534	Protein of unknown function
ANN00448	Chr1	3093318	3093693	-	376	0.594057	0.394794	0.756512	0.17777	Similar to PGBD4: PiggyBac transposable element-derived protein 4 (Homo sapiens OX%3D9606)
ANN00449	Chr1	3093783	3096785	-	3003	0.124974	0.103528	0.183597	0	Protein of unknown function
ANN00450	Chr1	3097568	3099023	-	1456	1.38501	4.56844	1.53149	1.64718	Protein of unknown function
ANN00451	Chr1	3099070	3100405	-	1336	0	0	0.154626	0	Similar to Ogfr: Opioid growth factor receptor (Mus musculus OX%3D10090)
ANN00452	Chr1	3100612	3101152	-	541	0	0	0	0	Protein of unknown function
ANN00453	Chr1	3102027	3104169	-	2143	0.954217	5.40092	1.34283	1.86429	Protein of unknown function
ANN00454	Chr1	3107026	3111211	+	4186	0.0951544	0.0707516	0.09865	0.0318584	Protein of unknown function
ANN00455	Chr1	3114304	3115560	-	1257	0	0	0.0387146	0	Protein of unknown function
ANN00456	Chr1	3115629	3116437	-	809	0	0	0.24072	0	Similar to PGBD3: PiggyBac transposable element-derived protein 3 (Homo sapiens OX%3D9606)
ANN00457	Chr1	3116529	3121946	-	5418	0	0	0.040308	0	Similar to X-element\ORF2: Probable RNA-directed DNA polymerase from transposon X-element (Drosophila melanogaster OX%3D7227)
ANN00458	Chr1	3122595	3123827	-	1233	0.190544	0.787317	0.167553	0	Similar to PGBD3: PiggyBac transposable element-derived protein 3 (Homo sapiens OX%3D9606)
ANN00459	Chr1	3132324	3133043	+	720	0.13034	0.102954	0.811552	0.224714	Protein of unknown function
ANN00460	Chr1	3133409	3134276	+	868	0.351219	0.426446	0.355224	0.57794	Protein of unknown function
ANN00461	Chr1	3136469	3139848	+	3380	0.0277343	0	0.158311	0	Similar to tc3a: Transposable element Tc3 transposase (Caenorhabditis elegans OX%3D6239)
ANN00462	Chr1	3143224	3144461	+	1238	0.160962	0	0	0	Protein of unknown function
ANN00463	Chr1	3145141	3147498	-	2358	0.144313	0.188436	0.120362	0.125115	Similar to Sperm acrosomal protein FSA-ACR.1 (Fragment) (Vulpes vulpes OX%3D9627)
ANN00464	Chr1	3148429	3148915	+	487	0	0	0.40021	0.548672	Protein of unknown function
ANN00465	Chr1	3160494	3163097	-	2604	0.162189	0.94404	0.394881	0.530953	Similar to Retrovirus-related Pol polyprotein from transposon TNT 1-94 (Nicotiana tabacum OX%3D4097)
ANN00466	Chr1	3166261	3166663	-	403	0	0.313254	0.543155	0	Protein of unknown function
ANN00467	Chr1	3166863	3168676	-	1814	0.10338	0.203932	0.174076	0.220619	Similar to PGBD4: PiggyBac transposable element-derived protein 4 (Homo sapiens OX%3D9606)
ANN00468	Chr1	3174096	3176053	+	1958	0	0	0	0.173482	Protein of unknown function
ANN00469	Chr1	3181586	3182653	+	1068	0	0.236041	0.755536	0.151424	Protein of unknown function
ANN00470	Chr1	3182976	3185171	+	2196	0.0267369	0	0	0	Similar to harbi1: Putative nuclease HARBI1 (Danio rerio OX%3D7955)
ANN00471	Chr1	3194027	3198320	+	4294	0.696167	1.13013	0.777413	1.41612	Protein of unknown function
ANN00472	Chr1	3204790	3206479	+	1690	0	0	0	0.0394693	Similar to Jrkl: Jerky protein homolog-like (Mus musculus OX%3D10090)
ANN00473	Chr1	3209952	3217072	+	7121	0.0559716	0.160023	0.192851	0	Protein of unknown function
ANN00474	Chr1	3216698	3220128	-	3431	0	0	0	0	Similar to tc1a: Transposable element Tc1 transposase (Caenorhabditis elegans OX%3D6239)
ANN00475	Chr1	3217236	3220606	+	3371	0	0	0	0	Protein of unknown function
ANN00476	Chr1	3220633	3223390	+	2758	0.106211	0	0.123479	0	Protein of unknown function
ANN00477	Chr1	3224225	3226085	+	1861	0.107049	0	0	0.0358407	Protein of unknown function
ANN00478	Chr1	3232806	3235297	+	2492	0.0846216	0	0.0438274	0.071431	Protein of unknown function
ANN00479	Chr1	3235964	3240706	+	4743	0.00988131	0.070205	0.0883196	0.0592104	Similar to RTase: Probable RNA-directed DNA polymerase from transposon BS (Drosophila melanogaster OX%3D7227)
ANN00480	Chr1	3253992	3254517	+	526	0.200755	0	0.18524	0.646675	Similar to PGBD3: PiggyBac transposable element-derived protein 3 (Homo sapiens OX%3D9606)
ANN00481	Chr1	3254914	3255175	-	262	1.27908	0	0	0	Protein of unknown function
ANN00482	Chr1	3255328	3256204	+	877	0	0.384634	0	0	Protein of unknown function
ANN00483	Chr1	3269236	3273577	+	4342	0.148572	0	0.195703	0.0525762	Protein of unknown function
ANN00484	Chr1	3273749	3275375	+	1627	0.0721865	0.0910502	0.069789	0.0819971	Protein of unknown function
ANN00485	Chr1	3285643	3286234	-	592	0	0	0	0	Similar to ERCC6: Chimeric ERCC6-PGBD3 protein (Homo sapiens OX%3D9606)
ANN00486	Chr1	3286267	3295860	-	9594	0.210121	0.501553	0.180052	0.0690758	Similar to PGBD3: PiggyBac transposable element-derived protein 3 (Homo sapiens OX%3D9606)
ANN00487	Chr1	3296564	3298283	-	1720	0.641518	0.516746	0.0635102	0	Similar to PGBD3: PiggyBac transposable element-derived protein 3 (Homo sapiens OX%3D9606)
ANN00488	Chr1	3303115	3305567	-	2453	0.358397	0.383279	0.327042	0.186161	Protein of unknown function
ANN00489	Chr1	3307512	3308025	-	514	0.79961	0.245474	0	0	Protein of unknown function
ANN00490	Chr1	3308487	3310887	-	2401	0.161252	0.792383	0.141846	0.42438	Similar to PGBD2: PiggyBac transposable element-derived protein 2 (Homo sapiens OX%3D9606)
ANN00491	Chr1	3325892	3331172	+	5281	0.228587	0.151479	0.287592	0.0558517	Protein of unknown function
ANN00492	Chr1	3348368	3348980	-	613	0	0	0	0	Protein of unknown function
ANN00493	Chr1	3362782	3364985	-	2204	0.0212697	0.124365	3.45626	0.383598	Similar to RTase: Probable RNA-directed DNA polymerase from transposon BS (Drosophila melanogaster OX%3D7227)
ANN00494	Chr1	3375084	3378765	-	3682	0.280048	0.0402194	0.0560785	0	Protein of unknown function
ANN00495	Chr1	3382419	3382770	-	352	0.300274	0	0	0	Similar to ZBED5: Zinc finger BED domain-containing protein 5 (Bos taurus OX%3D9913)
ANN00496	Chr1	3382938	3383543	-	606	0	0.15278	0	0	Similar to ZBED8: Protein ZBED8 (Bos taurus OX%3D9913)
ANN00497	Chr1	3387362	3387966	-	605	0.678647	0	0	0	Protein of unknown function
ANN00498	Chr1	3391109	3392762	-	1654	0.17008	0.0559178	0	0.0806578	Protein of unknown function
ANN00499	Chr1	3404663	3405633	+	971	0.350667	0.778284	0.565987	2.09571	Protein of unknown function
ANN00500	Chr1	3411136	3413162	-	2027	0.416394	1.52665	1.41011	1.39835	Similar to PGBD3: PiggyBac transposable element-derived protein 3 (Homo sapiens OX%3D9606)
ANN00501	Chr1	3415182	3416235	-	1054	0	0	0	0	Protein of unknown function
ANN00502	Chr1	3420043	3420322	-	280	0	0	0.195653	0.238938	Protein of unknown function
ANN00503	Chr1	3421937	3427823	-	5887	0.460853	0.796509	0.669572	0.437653	Similar to ZBED9: SCAN domain-containing protein 3 (Homo sapiens OX%3D9606)
ANN00504	Chr1	3435148	3437620	-	2473	0.659284	2.31124	0.623228	1.55947	Similar to FAR1: Protein FAR-RED IMPAIRED RESPONSE 1 (Arabidopsis thaliana OX%3D3702)
ANN00505	Chr1	3439452	3441450	-	1999	0	0	0	0.0667304	Protein of unknown function
ANN00506	Chr1	3442953	3445659	-	2707	0.130128	0.276243	0.300568	0.213569	Protein of unknown function
ANN00507	Chr1	3448714	3449500	-	787	0	0	0	0	Similar to ZMYM6: Zinc finger MYM-type protein 6 (Homo sapiens OX%3D9606)
ANN00508	Chr1	3462402	3467477	+	5076	0.781644	2.86883	2.32671	5.55101	Protein of unknown function
ANN00509	Chr1	3470730	3471965	-	1236	0.369966	1.21662	0.741159	2.40104	Protein of unknown function
ANN00510	Chr1	3483612	3484378	+	767	0	0.241337	0	0.232291	Similar to harbi1: Putative nuclease HARBI1 (Danio rerio OX%3D7955)
ANN00511	Chr1	3500625	3503205	+	2581	0.0363234	0	0	0	Protein of unknown function
ANN00512	Chr1	3504046	3506224	+	2179	0.0860554	0.142696	0.150378	0.227335	Protein of unknown function
ANN00513	Chr1	3528177	3529547	+	1371	0	0	0.162519	0.058967	Similar to PGBD3: PiggyBac transposable element-derived protein 3 (Homo sapiens OX%3D9606)
ANN00514	Chr1	3530356	3533448	+	3093	0.125013	0.081454	0.208314	0.190748	Protein of unknown function
ANN00515	Chr1	3539304	3545816	+	6513	0.0566928	0.0193378	0.0522774	0.0248111	Protein of unknown function
ANN00516	Chr1	3548066	3552123	+	4058	0.0780098	0.290106	0.128672	0.128945	Similar to Transposable element Tcb2 transposase (Caenorhabditis briggsae OX%3D6238)
ANN00517	Chr1	3559431	3564834	+	5404	0.164838	0.132839	0.170208	0	Protein of unknown function
ANN00518	Chr1	3562745	3563339	-	595	0	0	0	0	Protein of unknown function
ANN00519	Chr1	3563372	3572135	-	8764	0.100388	0.233912	0.0720299	0.0488673	Similar to PGBD3: PiggyBac transposable element-derived protein 3 (Homo sapiens OX%3D9606)
ANN00520	Chr1	3572190	3573773	-	1584	0.06658	0	0	0	Protein of unknown function
ANN00521	Chr1	3573917	3576691	-	2775	0	0.48295	0.151931	0.330721	Similar to PGBD3: PiggyBac transposable element-derived protein 3 (Homo sapiens OX%3D9606)
ANN00522	Chr1	3581679	3582707	-	1029	1.81429	0.288031	0.433173	0	Protein of unknown function
ANN00523	Chr1	3584686	3585506	-	821	0	0	0	0.359631	Protein of unknown function
ANN00524	Chr1	3585531	3595362	-	9832	0.747522	1.25036	0.514243	0.188019	Similar to ZBED1: Zinc finger BED domain-containing protein 1 (Homo sapiens OX%3D9606)
ANN00525	Chr1	3606852	3607450	-	599	0.431349	0	0.853012	0.111478	Similar to ZMYM6: Zinc finger MYM-type protein 6 (Homo sapiens OX%3D9606)
ANN00526	Chr1	3637427	3638884	+	1458	0	0	0	0	Similar to fp-1: Foot protein 1 variant 1 (Perna viridis OX%3D73031)
ANN00527	Chr1	3639454	3645406	-	5953	0	0	0	0	Similar to bpaC: Autotransporter adhesin BpaC (Burkholderia pseudomallei (strain 1026b) OX%3D884204)
ANN00528	Chr1	3645846	3646557	+	712	0	0	0	0	Similar to MAGEL2: MAGE-like protein 2 (Homo sapiens OX%3D9606)
ANN00529	Chr1	3660331	3664189	+	3859	0	0	0.138655	0.126801	Protein of unknown function
ANN00530	Chr1	3670524	3674389	-	3866	0.0561269	0.545753	0.164552	0.5166	Similar to GIP: Copia protein (Drosophila melanogaster OX%3D7227)
ANN00531	Chr1	3674528	3677728	+	3201	0.0476256	0.0462649	0.102351	0.0834068	Protein of unknown function
ANN00532	Chr1	3697640	3701554	+	3915	0.498462	6.30478	0.539401	3.8828	Similar to SLC1A1: Excitatory amino acid transporter 3 (Bos taurus OX%3D9913)
ANN00533	Chr1	3703930	3710270	+	6341	0.280079	4.19284	0.718203	9.36575	Similar to glt-1: Excitatory amino acid transporter (Caenorhabditis elegans OX%3D6239)
ANN00534	Chr1	3738785	3740264	+	1480	32.085	10.7176	32.4388	11.1975	Similar to PUS10: tRNA pseudouridine synthase Pus10 (Homo sapiens OX%3D9606)
ANN00535	Chr1	3781741	3782356	-	616	0	0	0	0.262715	Similar to Transposable element Tcb1 transposase (Caenorhabditis briggsae OX%3D6238)
ANN00536	Chr1	3783294	3783915	+	622	0	0	0	0	Protein of unknown function
ANN00537	Chr1	3784057	3784390	+	334	0	0	0	0	Similar to ZBED8: Protein ZBED8 (Bos taurus OX%3D9913)
ANN00538	Chr1	3784628	3786536	+	1909	0.479096	0.461668	0.54945	0.618233	Similar to ZBED8: Protein ZBED8 (Bos taurus OX%3D9913)
ANN00539	Chr1	3788306	3792314	+	4009	0.102345	0.166124	0.230523	0.151237	Similar to Retrovirus-related Pol polyprotein from transposon TNT 1-94 (Nicotiana tabacum OX%3D4097)
ANN00540	Chr1	3807482	3808742	-	1261	1.96308	3.19969	1.1673	0.936377	Protein of unknown function
ANN00541	Chr1	3811885	3812934	-	1050	0.18981	0	0.428603	0.308045	Similar to pif1: ATP-dependent DNA helicase pif1 (Psychrobacter sp. (strain PRwf-1) OX%3D349106)
ANN00542	Chr1	3812993	3813542	-	550	0.383957	0	0.738123	0	Protein of unknown function
ANN00543	Chr1	3813811	3818748	+	4938	0.0711996	0.0382605	0.0713594	0.0941157	Protein of unknown function
ANN00544	Chr1	3821282	3822112	-	831	0	0.311913	0	0	Protein of unknown function
ANN00545	Chr1	3823091	3823406	-	316	0.18631	0	0	0	Protein of unknown function
ANN00546	Chr1	3851454	3853601	-	2148	0	0	0.598207	1.02589	Similar to GIP: Copia protein (Drosophila melanogaster OX%3D7227)
ANN00547	Chr1	3856701	3860019	-	3319	0.112977	0.111431	0.0342004	0.196132	Protein of unknown function
ANN00548	Chr1	3862666	3863176	-	511	0	0	0	0	Protein of unknown function
ANN00549	Chr1	3864531	3865524	+	994	0	0	0	0	Protein of unknown function
ANN00550	Chr1	3868694	3870771	+	2078	0	0	0	0	Similar to X-element\ORF2: Probable RNA-directed DNA polymerase from transposon X-element (Drosophila melanogaster OX%3D7227)
ANN00551	Chr1	3880365	3881259	-	895	0	0	0	0.0745679	Similar to ZBED1: Zinc finger BED domain-containing protein 1 (Homo sapiens OX%3D9606)
ANN00552	Chr1	3882855	3884534	+	1680	0.425674	0.176352	0.320578	0.211953	Protein of unknown function
ANN00553	Chr1	3886760	3887404	+	645	0	0	0.169525	0.250885	Protein of unknown function
ANN00554	Chr1	3890802	3894776	+	3975	0.172539	0	0.0367077	0.107757	Protein of unknown function
ANN00555	Chr1	3899063	3901839	+	2777	0	0.0332969	0.306387	0.0480286	Protein of unknown function
ANN00556	Chr1	3907822	3910084	+	2263	0	0.0981749	0	0.0714278	Similar to harbi1: Putative nuclease HARBI1 (Danio rerio OX%3D7955)
ANN00557	Chr1	3912957	3914199	-	1243	0	0.148844	0	0.214698	Similar to pol: Retrovirus-related Pol polyprotein from transposon gypsy (Drosophila melanogaster OX%3D7227)
ANN00558	Chr1	3929745	3930904	-	1160	0	0	0.0979093	0.230073	Protein of unknown function
ANN00559	Chr1	3934961	3936005	+	1045	0	0	0.0931523	0	Protein of unknown function
ANN00560	Chr1	3936157	3936975	+	819	0	0	0	0.197518	Protein of unknown function
ANN00561	Chr1	3937210	3939422	+	2213	0	0	0	0	Protein of unknown function
ANN00562	Chr1	3946406	3952140	-	5735	0.02047	0.0477809	0.206355	0.266006	Similar to PIF1: ATP-dependent DNA helicase PIF1 (Homo sapiens OX%3D9606)
ANN00563	Chr1	3963701	3964703	+	1003	0	0.147752	0.553369	0	Similar to Retrovirus-related Pol polyprotein from transposon TNT 1-94 (Nicotiana tabacum OX%3D4097)
ANN00564	Chr1	3972857	3973954	+	1098	0.192153	0	0	0	Protein of unknown function
ANN00565	Chr1	3973988	3975918	+	1931	0.525458	0.0652476	0.0565669	0	Protein of unknown function
ANN00566	Chr1	3977006	3977600	+	595	0.0788841	0	0	0	Protein of unknown function
ANN00567	Chr1	3979704	3982831	+	3128	0.61818	0.685291	0.27634	0.372151	Similar to GTF2IRD2: General transcription factor II-I repeat domain-containing protein 2 (Bos taurus OX%3D9913)
ANN00568	Chr1	3983833	3984997	+	1165	0.311895	0.34356	0.525477	0.645714	Protein of unknown function
ANN00569	Chr1	4003062	4008466	+	5405	0	0.0684176	0.0606074	0.0986879	Similar to Retrovirus-related Pol polyprotein from type-1 retrotransposable element R2 (Fragment) (Popillia japonica OX%3D7064)
ANN00570	Chr1	4009463	4010084	-	622	0	0.893064	0	0	Protein of unknown function
ANN00571	Chr1	4013027	4015598	-	2572	1.85772	2.24117	2.35077	1.12062	Protein of unknown function
ANN00572	Chr1	4017639	4022172	+	4534	1.14739	0.337792	0.499263	0.035643	Protein of unknown function
ANN00573	Chr1	4026128	4028738	-	2611	2.83436	2.05149	1.19517	0.0766249	Protein of unknown function
ANN00574	Chr1	4028851	4031432	-	2582	0.456489	1.10094	1.33205	1.31666	Protein of unknown function
ANN00575	Chr1	4048304	4050656	+	2353	2.00312	5.6332	1.26771	3.02416	Similar to ZNF862: Zinc finger protein 862 (Homo sapiens OX%3D9606)
ANN00576	Chr1	4052004	4054122	+	2119	1.30073	0.782775	0.667171	1.22643	Similar to ZNF862: Zinc finger protein 862 (Homo sapiens OX%3D9606)
ANN00577	Chr1	4055077	4056676	+	1600	0.0734054	0	0.0912298	0.0416908	Similar to THAP9: DNA transposase THAP9 (Homo sapiens OX%3D9606)
ANN00578	Chr1	4058062	4061407	+	3346	0.178663	0.259936	0.100487	0.987634	Protein of unknown function
ANN00579	Chr1	4063875	4067461	-	3587	0.18795	0.271415	0.119653	0.230955	Protein of unknown function
ANN00580	Chr1	4081110	4082151	-	1042	0.180047	0.177583	0.307303	0	Similar to POGK: Pogo transposable element with KRAB domain (Homo sapiens OX%3D9606)
ANN00581	Chr1	4083040	4084757	-	1718	0	0.181009	0.0566401	0	Protein of unknown function
ANN00582	Chr1	4085129	4085597	-	469	0	0.790018	0	0.345234	Protein of unknown function
ANN00583	Chr1	4092634	4093030	-	397	0.236652	0.373858	0	0.744689	Protein of unknown function
ANN00584	Chr1	4103761	4107484	-	3724	0.106962	0.878733	0.457025	1.41087	Protein of unknown function
ANN00585	Chr1	4116557	4117519	-	963	0.109559	0.361746	0.433631	0	Protein of unknown function
ANN00586	Chr1	4119021	4119807	-	787	0.253321	0	0.247458	0.205559	Protein of unknown function
ANN00587	Chr1	4119863	4121276	-	1414	0.0745904	0	0	0	Protein of unknown function
ANN00588	Chr1	4122187	4122559	+	373	7.63	0	5.26478	0.434327	Protein of unknown function
ANN00590	Chr1	4123556	4124738	-	1183	0	0.0626259	0.0960041	0.273384	Similar to F54H12.3: Putative uncharacterized transposon-derived protein F54H12.3 (Caenorhabditis elegans OX%3D6239)
ANN00591	Chr1	4134364	4136878	-	2515	0.037277	0.0500907	0	0.176845	Protein of unknown function
ANN00592	Chr1	4140821	4142663	-	1843	0	0	0.120875	0.0877143	Protein of unknown function
ANN00593	Chr1	4151187	4152032	-	846	0.124729	0	0	0	Similar to ORF1: Nucleic-acid-binding protein from transposon X-element (Drosophila melanogaster OX%3D7227)
ANN00594	Chr1	4155320	4155851	-	532	0	0	0	0	Protein of unknown function
ANN00595	Chr1	4155989	4157294	-	1306	0	0	0	0	Similar to ZNF862: Zinc finger protein 862 (Homo sapiens OX%3D9606)
ANN00596	Chr1	4158462	4163374	-	4913	0.0190786	0.0769104	0.045328	0	Similar to HARBI1: Putative nuclease HARBI1 (Bos taurus OX%3D9913)
ANN00597	Chr1	4174384	4174759	+	376	1.46912	0.394794	0	0	Protein of unknown function
ANN00598	Chr1	4174879	4175443	+	565	0.104056	0	0.366002	0	Protein of unknown function
ANN00599	Chr1	4179012	4179273	-	262	0	0	0	0	Protein of unknown function
ANN00600	Chr1	4179346	4180234	-	889	0.132179	0.208181	0.122944	0	Protein of unknown function
ANN00601	Chr1	4182651	4184109	-	1459	0.361645	0	0.372121	0	Protein of unknown function
ANN00602	Chr1	4186601	4187207	-	607	0	0	0.881101	0	Protein of unknown function
ANN00603	Chr1	4193191	4194169	+	979	0.107767	0	0.260788	0	Similar to pol: Gag-Pro-Pol polyprotein (Simian retrovirus SRV-1 OX%3D11942)
ANN00604	Chr1	4220217	4221087	+	871	2.16977	0	2.24897	0	Protein of unknown function
ANN00605	Chr1	4235684	4237721	+	2038	1.50488	0	1.66645	0	Protein of unknown function
ANN00606	Chr1	4242940	4243969	+	1030	0	0	0	0.25914	Protein of unknown function
ANN00607	Chr1	4247698	4249219	-	1522	1.8727	0.447417	1.54687	0	Protein of unknown function
ANN00608	Chr1	4250673	4251780	+	1108	1.13261	0	0.896258	0	Protein of unknown function
ANN00609	Chr1	4282280	4282700	+	421	4.79741	1.03981	4.73061	0.634892	Similar to TIGD6: Tigger transposable element-derived protein 6 (Homo sapiens OX%3D9606)
ANN00610	Chr1	4286075	4287139	+	1065	0	0.139143	0	0	Protein of unknown function
ANN00611	Chr1	4290887	4294056	+	3170	0	0.105053	0	0.101969	Similar to jockey\pol: RNA-directed DNA polymerase from mobile element jockey (Drosophila funebris OX%3D7221)
ANN00612	Chr1	4300732	4303760	+	3029	1.61346	0.0831757	1.43144	0.312306	Similar to GTF2IRD2: General transcription factor II-I repeat domain-containing protein 2A (Homo sapiens OX%3D9606)
ANN00613	Chr1	4320719	4322600	+	1882	1.09389	0.245699	0.671916	0	Protein of unknown function
ANN00614	Chr1	4348162	4348468	+	307	0.650688	0	0.178389	0	Protein of unknown function
ANN00615	Chr1	4350411	4351071	+	661	0.159691	0.1908	0	0.244803	Protein of unknown function
ANN00616	Chr1	4351292	4358168	+	6877	0.988741	0.096833	0.752563	0.0428879	Similar to RTase: Probable RNA-directed DNA polymerase from transposon BS (Drosophila melanogaster OX%3D7227)
ANN00617	Chr1	4372850	4379153	+	6304	234.277	1610.9	148.695	1666.12	Similar to EbpIII: Ejaculatory bulb-specific protein 3 (Drosophila melanogaster OX%3D7227)
ANN00618	Chr1	4398585	4402671	+	4087	100.553	1377.54	85.7026	1157.74	Similar to EbpIII: Ejaculatory bulb-specific protein 3 (Drosophila melanogaster OX%3D7227)
ANN00619	Chr1	4403018	4406209	-	3192	121.637	1550.53	109.145	1448.25	Similar to RTase: Probable RNA-directed DNA polymerase from transposon BS (Drosophila melanogaster OX%3D7227)
ANN00620	Chr1	4413597	4420025	-	6429	0.271892	0.538692	0.163091	0.290724	Similar to Dmc1: Meiotic recombination protein DMC1/LIM15 homolog (Mus musculus OX%3D10090)
ANN00621	Chr1	4420751	4423445	-	2695	0	0.0274773	0	0	Protein of unknown function
ANN00622	Chr1	4425660	4427106	+	1447	0.178284	0.547816	0.210011	0.469577	Protein of unknown function
ANN00623	Chr1	4430886	4432469	+	1584	84.6257	21.7364	92.4539	33.4019	Similar to snu13: NHP2-like protein 1 (Xenopus laevis OX%3D8355)
ANN00624	Chr1	4436281	4437573	-	1293	0.889099	0.326643	1.00959	1.46754	Protein of unknown function
ANN00625	Chr1	4451249	4451657	-	409	1.26299	0	1.11646	0	Protein of unknown function
ANN00626	Chr1	4457807	4458863	-	1057	0	0	0.0460469	0	Protein of unknown function
ANN00627	Chr1	4459764	4460790	-	1027	0.0913395	0	0	0	Protein of unknown function
ANN00628	Chr1	4460911	4462886	-	1976	0.118861	0.063761	0.104519	0	Similar to SETMAR: Histone-lysine N-methyltransferase SETMAR (Homo sapiens OX%3D9606)
ANN00629	Chr1	4469350	4470495	+	1146	0	0	0	0.141109	Protein of unknown function
ANN00630	Chr1	4480265	4482245	-	1981	0.112511	0.0373858	0.0551384	0.067337	Similar to harbi1: Putative nuclease HARBI1 (Danio rerio OX%3D7955)
ANN00631	Chr1	4484894	4485155	+	262	0.224857	36.4801	0.418292	32.7886	Similar to EbpIII: Ejaculatory bulb-specific protein 3 (Drosophila melanogaster OX%3D7227)
ANN00632	Chr1	4491316	4494010	+	2695	0	0.0274773	0	0	Similar to RTase: Probable RNA-directed DNA polymerase from transposon BS (Drosophila melanogaster OX%3D7227)
ANN00633	Chr1	4502736	4503336	+	601	0.958162	16.1173	0.378256	15.4977	Similar to EbpIII: Ejaculatory bulb-specific protein 3 (Drosophila melanogaster OX%3D7227)
ANN00636	Chr1	4532486	4553762	-	21277	0.0319528	1.16553	0.0483578	1.1071	Similar to RGS20: Regulator of G-protein signaling 20 (Gallus gallus OX%3D9031)
ANN00637	Chr1	4599200	4603181	-	3982	0	1.00513	0.0274238	0.486733	Protein of unknown function
ANN00638	Chr1	4645442	4647071	-	1630	1.07839	7.64808	0.238529	5.09582	Similar to chn: Protein charlatan (Drosophila melanogaster OX%3D7227)
ANN00639	Chr1	4661034	4661874	+	841	0	0	0	0	Similar to fp-1: Foot protein 1 variant 1 (Perna viridis OX%3D73031)
ANN00640	Chr1	4662445	4668397	-	5953	0	0	0	0	Similar to bpaC: Autotransporter adhesin BpaC (Burkholderia pseudomallei (strain 1026b) OX%3D884204)
ANN00641	Chr1	4677532	4684911	-	7380	11.8426	4.89369	12.2882	4.91147	Similar to cops2: COP9 signalosome complex subunit 2 (Danio rerio OX%3D7955)
ANN00642	Chr1	4697062	4705930	-	8869	1.8132	3.93713	1.64729	2.46996	Similar to lin-10: Protein lin-10 (Caenorhabditis elegans OX%3D6239)
ANN00643	Chr1	4706006	4716791	-	10786	0.26302	0.335731	0.328639	0.506589	Protein of unknown function
ANN00644	Chr1	4795177	4799183	-	4007	0.200382	0.382229	0.186964	0.190101	Similar to GVQW3: Protein GVQW3 (Homo sapiens OX%3D9606)
ANN00645	Chr1	4833235	4837621	-	4387	0.152442	0.898013	0.19022	0.711244	Similar to Cpm: Carboxypeptidase M (Mus musculus OX%3D10090)
ANN00646	Chr1	4881099	4900273	+	19175	1.56341	0.540124	1.77697	0.46756	Similar to GTF2H4: General transcription factor IIH subunit 4 (Pan troglodytes OX%3D9598)
ANN00647	Chr1	4918182	4929674	-	11493	0.999336	12.8829	1.34208	9.70285	Similar to SLC1A1: Excitatory amino acid transporter 3 (Oryctolagus cuniculus OX%3D9986)
ANN00648	Chr1	4919328	4920962	+	1635	0	0	0	0	Protein of unknown function
ANN00649	Chr1	4964946	4969619	+	4674	0.0376766	0.053896	0.0467255	0.156548	Protein of unknown function
ANN00650	Chr1	4999575	5001563	+	1989	0.50093	0.305275	0.454483	0	Similar to K02A2.6: Uncharacterized protein K02A2.6 (Caenorhabditis elegans OX%3D6239)
ANN00651	Chr1	5078082	5078262	+	181	0.326042	0	1.54021	0	Protein of unknown function
ANN00652	Chr1	5078322	5081674	+	3353	1.04518	0.184446	1.09223	0.368324	Protein of unknown function
ANN00653	Chr1	5081732	5082391	+	660	0.925754	0.224655	0.485435	0.236162	Protein of unknown function
ANN00654	Chr1	5091726	5094054	+	2329	8.53628	0.187595	7.32753	0.171814	Similar to PGBD4: PiggyBac transposable element-derived protein 4 (Homo sapiens OX%3D9606)
ANN00655	Chr1	5094662	5143958	+	49297	3.32353	4.14556	3.93168	4.98854	Similar to lrpprc: Leucine-rich PPR motif-containing protein%2C mitochondrial (Xenopus tropicalis OX%3D8364)
ANN00656	Chr1	5109782	5110951	-	1170	0	0	0	0	Similar to Transposable element Tcb1 transposase (Caenorhabditis briggsae OX%3D6238)
ANN00657	Chr1	5140104	5143482	-	3379	0	0	0	0	Similar to Transposon TX1 uncharacterized 149 kDa protein (Xenopus laevis OX%3D8355)
ANN00658	Chr1	5149647	5154519	-	4873	0.970167	5.35117	0.504648	6.27146	Similar to Calmodulin (Pneumocystis carinii OX%3D4754)
ANN00659	Chr1	5158293	5161204	+	2912	0	0.050858	0	0	Similar to X-element\ORF2: Probable RNA-directed DNA polymerase from transposon X-element (Drosophila melanogaster OX%3D7227)
ANN00660	Chr1	5166480	5170085	-	3606	0	0.114919	0.0427155	0.152947	Protein of unknown function
ANN00661	Chr1	5174836	5175360	-	525	0.692835	5.04236	0.309356	3.74367	Protein of unknown function
ANN00662	Chr1	5177810	5179717	-	1908	0.206001	4.0639	0.310874	3.89308	Protein of unknown function
ANN00663	Chr1	5186911	5190063	+	3153	0	0	0.0308537	0	Similar to R1A1-element\ORF2: Putative 115 kDa protein in type-1 retrotransposable element R1DM (Drosophila melanogaster OX%3D7227)
ANN00664	Chr1	5191498	5192343	+	846	0	0	0	0	Protein of unknown function
ANN00665	Chr1	5201622	5202697	+	1076	0	0	0	0	Similar to RNA-directed RNA polymerase (Atkinsonella hypoxylon virus (isolate 2H) OX%3D647331)
ANN00666	Chr1	5318335	5321263	-	2929	0.436131	1.41264	0.988431	1.0984	Similar to LINE-1 reverse transcriptase homolog (Nycticebus coucang OX%3D9470)
ANN00667	Chr1	5330046	5331652	+	1607	0	0	0	0.0415091	Protein of unknown function
ANN00668	Chr1	5337751	5339357	-	1607	0	0.0921841	0.135958	0	Protein of unknown function
ANN00669	Chr1	5417002	5420002	+	3001	0.773896	0.0616214	1.60102	0.0593115	Similar to CCDC81: Coiled-coil domain-containing protein 81 (Homo sapiens OX%3D9606)
ANN00670	Chr1	5424535	5431350	+	6816	0.0172231	0	0.016651	0.0261093	Protein of unknown function
ANN00671	Chr1	5466859	5467429	-	571	0.328822	1.24683	0.0853079	1.57038	Protein of unknown function
ANN00672	Chr1	5477100	5480961	-	3862	1.18697	0.109304	0.693342	0.194603	Protein of unknown function
ANN00673	Chr1	5527694	5530127	+	2434	0	0.0517583	0	0	Protein of unknown function
ANN00674	Chr1	5540522	5541653	+	1132	5.19853	2.03503	9.63116	0.117884	Protein of unknown function
ANN00675	Chr1	5547702	5548671	-	970	0	0	0	0	Protein of unknown function
ANN00676	Chr1	5563602	5568421	-	4820	0.0996583	0.17515	0.288178	0.239021	Protein of unknown function
ANN00677	Chr1	5570643	5575725	-	5083	0.0207391	0	0	0	Similar to RTase: Probable RNA-directed DNA polymerase from transposon BS (Drosophila melanogaster OX%3D7227)
ANN00678	Chr1	5585126	5586812	-	1687	0.0312563	0.0746904	0.0323767	0.0958302	Protein of unknown function
ANN00679	Chr1	5597294	5598323	-	1030	0.204852	0.122379	1.46496	0.17292	Similar to ZBED5: Zinc finger BED domain-containing protein 5 (Canis lupus familiaris OX%3D9615)
ANN00680	Chr1	5606695	5611539	-	4845	0.385766	0.317767	0.9279	1.13333	Similar to PGBD4: PiggyBac transposable element-derived protein 4 (Homo sapiens OX%3D9606)
ANN00681	Chr1	5612302	5612764	-	463	0	0.400139	0	0	Protein of unknown function
ANN00682	Chr1	5616124	5617456	-	1333	0.0791263	0.138787	0	0.576373	Similar to PGBD4: PiggyBac transposable element-derived protein 4 (Homo sapiens OX%3D9606)
ANN00683	Chr1	5620900	5623427	+	2528	0.0232242	0.099666	0.0432031	0	Similar to LINE-1 reverse transcriptase homolog (Nycticebus coucang OX%3D9470)
ANN00684	Chr1	5624927	5625446	-	520	0.101538	0	0.187381	0	Protein of unknown function
ANN00685	Chr1	5626735	5629680	-	2946	0.66467	0.413383	0.577945	0.164587	Protein of unknown function
ANN00686	Chr1	5635614	5638230	-	2617	0.0179118	0	0.0642446	0.29111	Protein of unknown function
ANN00687	Chr1	5638985	5641734	-	2750	0	0	0.229969	0.177138	Similar to Pogk: Pogo transposable element with KRAB domain (Mus musculus OX%3D10090)
ANN00688	Chr1	5644047	5646204	-	2158	0	0.0686359	0	0.0618115	Protein of unknown function
ANN00689	Chr1	5648583	5649271	-	689	0.698043	0	0	0.258626	Protein of unknown function
ANN00690	Chr1	5649770	5650100	-	331	0.283983	0.560195	0.515804	0	Protein of unknown function
ANN00691	Chr1	5652989	5656150	+	3162	0.211519	1.1799	0.101203	0.147626	Similar to K02A2.6: Uncharacterized protein K02A2.6 (Caenorhabditis elegans OX%3D6239)
ANN00692	Chr1	5661000	5661855	+	856	0	0	0	0	Protein of unknown function
ANN00693	Chr1	5662256	5667962	-	5707	0.0174475	0.26331	0.305382	0.292811	Similar to Retrovirus-related Pol polyprotein from transposon TNT 1-94 (Nicotiana tabacum OX%3D4097)
ANN00694	Chr1	5668377	5668635	+	259	0	0	0	1.03355	Protein of unknown function
ANN00695	Chr1	5668856	5670887	+	2032	0	0.207791	0.165499	0.0795518	Similar to POL: Retrovirus-related Pol polyprotein from transposon 412 (Drosophila melanogaster OX%3D7227)
ANN00696	Chr1	5672281	5673205	-	925	0	0.160225	0.052625	0.319153	Protein of unknown function
ANN00697	Chr1	5688673	5689361	+	689	0.459576	1.25896	0.158683	0.387579	Protein of unknown function
ANN00698	Chr1	5692730	5693848	-	1119	0.409232	1.07252	0.292954	0.55704	Protein of unknown function
ANN00699	Chr1	5693995	5694978	-	984	0.321959	1.17481	0.115439	0	Protein of unknown function
ANN00700	Chr1	5695300	5697125	-	1826	0.0643152	0.081122	0.122001	0.518172	Similar to pol: RNA-directed DNA polymerase from mobile element jockey (Drosophila melanogaster OX%3D7227)
ANN00701	Chr1	5697163	5698071	-	909	0	0.163048	0.120236	0.284933	Similar to pol: RNA-directed DNA polymerase from mobile element jockey (Drosophila melanogaster OX%3D7227)
ANN00702	Chr1	5698154	5698802	-	649	0	0.228469	1.02567	0.648594	Protein of unknown function
ANN00703	Chr1	5699804	5700203	+	400	0	3.81088	0.273619	0.73909	Similar to Msantd3: Myb/SANT-like DNA-binding domain-containing protein 3 (Mus musculus OX%3D10090)
ANN00704	Chr1	5701062	5703060	-	1999	0.023452	0	0	0	Similar to ZNF862: Zinc finger protein 862 (Homo sapiens OX%3D9606)
ANN00705	Chr1	5710137	5711683	-	1547	0.621886	3.75588	0.329949	0.522541	Protein of unknown function
ANN00706	Chr1	5716495	5717767	+	1273	0.0922761	0.890195	0.162284	0	Similar to JRKL: Jerky protein homolog-like (Homo sapiens OX%3D9606)
ANN00707	Chr1	5728580	5730886	+	2307	0.533651	0.407545	0.378748	0	Similar to F52C9.6: Putative uncharacterized transposon-derived protein F52C9.6 (Caenorhabditis elegans OX%3D6239)
ANN00708	Chr1	5736654	5737454	-	801	0.190317	0.0925298	0	0.201962	Protein of unknown function
ANN00709	Chr1	5741533	5746411	-	4879	0.0216064	0.0378976	0	0.0729032	Similar to X-element\ORF2: Probable RNA-directed DNA polymerase from transposon X-element (Drosophila melanogaster OX%3D7227)
ANN00710	Chr1	5754506	5755957	+	1452	0.226371	0.102031	0	0	Protein of unknown function
ANN00711	Chr1	5759199	5759993	-	795	0.147828	0.876573	0.540398	0.427587	Protein of unknown function
ANN00712	Chr1	5760969	5764597	+	3629	0.13403	0.142717	0.242194	0.160999	Protein of unknown function
ANN00713	Chr1	5766125	5767335	+	1211	0	0	0.180453	0	Protein of unknown function
ANN00714	Chr1	5770271	5772471	+	2201	0.266762	0.0840292	0	0.521524	Protein of unknown function
ANN00715	Chr1	5772657	5773011	-	355	0	0	0	0.376631	Protein of unknown function
ANN00716	Chr1	5773743	5775993	+	2251	0	0	0.098956	0.079082	Similar to rsgI2: Anti-sigma-I factor RsgI2 (Hungateiclostridium thermocellum (strain ATCC 27405 / DSM 1237 / JCM 9322 / NBRC 103400 / NCIMB 10682 / NRRL B-4536 / VPI 7372) OX%3D203119)
ANN00717	Chr1	5777079	5777715	+	637	0.331435	0	0	0	Protein of unknown function
ANN00718	Chr1	5792163	5801160	+	8998	0.0599705	0.11682	0.0553716	0.0525544	Protein of unknown function
ANN00719	Chr1	5813858	5816843	-	2986	1.07157	1.82981	0.433785	0.301861	Similar to pol: RNA-directed DNA polymerase from mobile element jockey (Drosophila melanogaster OX%3D7227)
ANN00720	Chr1	5821512	5824216	+	2705	0	0.068367	0	0.164419	Protein of unknown function
ANN00721	Chr1	5838492	5840242	+	1751	0.113777	0.253796	0.120416	0.101677	Similar to PGBD4: PiggyBac transposable element-derived protein 4 (Homo sapiens OX%3D9606)
ANN00722	Chr1	5843638	5852483	+	8846	0.0834785	0.206592	0.127797	0.0591442	Protein of unknown function
ANN00723	Chr1	5880953	5881704	-	752	0.140341	0.413838	0.585007	0.392672	Protein of unknown function
ANN00724	Chr1	5888394	5890208	-	1815	0.342497	0.252944	0.143888	0.162567	Protein of unknown function
ANN00725	Chr1	5902484	5902865	-	382	0	0	0.859639	0	Protein of unknown function
ANN00726	Chr1	5909472	5910159	-	688	0	0.215499	0.158914	0.623325	Protein of unknown function
ANN00727	Chr1	5924134	5924716	-	583	0	0	0	0	Protein of unknown function
ANN00728	Chr1	5924807	5925784	-	978	0.287761	0	0.111744	0	Protein of unknown function
ANN00729	Chr1	5925924	5927868	-	1945	0.174973	0	0	0.0915301	Protein of unknown function
ANN00730	Chr1	5933760	5939463	-	5704	1.70757	4.83793	1.51401	1.44404	Similar to RTase: Probable RNA-directed DNA polymerase from transposon BS (Drosophila melanogaster OX%3D7227)
ANN00731	Chr1	5948151	5951124	-	2974	0.212907	0.184309	0.587393	0.641506	Similar to R1A1-element\ORF2: Putative 115 kDa protein in type-1 retrotransposable element R1DM (Drosophila melanogaster OX%3D7227)
ANN00732	Chr1	5955044	5958153	-	3110	0.0452144	0.135742	0.172059	0.100116	Similar to R1A1-element\ORF2: Putative 115 kDa protein in type-1 retrotransposable element R1DM (Drosophila melanogaster OX%3D7227)
ANN00733	Chr1	5958443	5960010	-	1568	0	0.0589867	0.0724166	0.113551	Protein of unknown function
ANN00734	Chr1	5960076	5961876	-	1801	0.221234	0	0.123695	0.172923	Protein of unknown function
ANN00735	Chr1	5976163	5981558	-	5396	0.218277	0.124908	0.194502	0.0396872	Similar to TY3B-I: Transposon Ty3-I Gag-Pol polyprotein (Saccharomyces cerevisiae (strain ATCC 204508 / S288c) OX%3D559292)
ANN00736	Chr1	5981841	5982963	-	1123	0	0	0	0	Protein of unknown function
ANN00737	Chr1	5989034	5991630	-	2597	0.0405995	0.0242542	0.411272	0.153307	Similar to Retrovirus-related Pol polyprotein from transposon TNT 1-94 (Nicotiana tabacum OX%3D4097)
ANN00738	Chr1	5998291	6002324	-	4034	0	0	0	0.0400619	Protein of unknown function
ANN00739	Chr1	6017163	6019720	+	2558	0.275057	0	0.0807294	0.271949	Similar to drc7: Dynein regulatory complex subunit 7 (Xenopus tropicalis OX%3D8364)
ANN00740	Chr1	6026461	6027810	+	1350	0.217523	0.406191	0.336438	0.56489	Protein of unknown function
ANN00741	Chr1	6030816	6032094	+	1279	0.312193	0	0	0.278458	Similar to PGBD3: PiggyBac transposable element-derived protein 3 (Homo sapiens OX%3D9606)
ANN00742	Chr1	6038910	6040218	+	1309	0.425545	1.20495	2.65444	1.63297	Protein of unknown function
ANN00743	Chr1	6040857	6044706	+	3850	0.330453	0.163421	0.132528	0.0519592	Protein of unknown function
ANN00744	Chr1	6050762	6051933	+	1172	0.26004	0	0.276861	0	Protein of unknown function
ANN00745	Chr1	6052177	6054498	+	2322	0	0	0	0	Similar to Allergen Ani s 10 (Anisakis simplex OX%3D6269)
ANN00746	Chr1	6053717	6059051	-	5335	0.0175692	0.0866443	0.201197	0.213624	Protein of unknown function
ANN00747	Chr1	6070400	6076306	+	5907	0.210292	0.203577	0.15802	0.346168	Similar to PGBD3: PiggyBac transposable element-derived protein 3 (Homo sapiens OX%3D9606)
ANN00748	Chr1	6080515	6081762	+	1248	0.272772	0	0.56296	0.14269	Protein of unknown function
ANN00749	Chr1	6092920	6093409	-	490	0.191645	0	0.298316	0	Protein of unknown function
ANN00750	Chr1	6100425	6105552	-	5128	0.0549264	0.0288761	0.193506	0.0315135	Similar to RTase: Probable RNA-directed DNA polymerase from transposon BS (Drosophila melanogaster OX%3D7227)
ANN00751	Chr1	6111319	6111817	-	499	0	0	0.219225	0	Protein of unknown function
ANN00752	Chr1	6112347	6113237	+	891	0.105297	0	0	0	Similar to K02A2.6: Uncharacterized protein K02A2.6 (Caenorhabditis elegans OX%3D6239)
ANN00753	Chr1	6165393	6170533	+	5141	0	0	0	0	Similar to pol: Retrovirus-related Pol polyprotein from transposon opus (Drosophila melanogaster OX%3D7227)
ANN00754	Chr1	6209641	6212626	-	2986	0.164902	0	0.0365742	0	Similar to pol: RNA-directed DNA polymerase from mobile element jockey (Drosophila melanogaster OX%3D7227)
ANN00755	Chr1	6250022	6254270	+	4249	1.23312	0.169049	1.27479	0.0418867	Protein of unknown function
ANN00756	Chr1	6254314	6255790	+	1477	0.222336	0	0.351427	0	Protein of unknown function
ANN00757	Chr1	6266519	6273495	+	6977	0.240977	0.238724	0.301871	0.186573	Protein of unknown function
ANN00758	Chr1	6273609	6275534	+	1926	1.13234	0.226868	1.73438	0.245627	Protein of unknown function
ANN00759	Chr1	6276935	6278926	+	1992	0.217911	0.230457	0.274664	0.178739	Similar to Tf2-8: Transposon Tf2-8 polyprotein (Schizosaccharomyces pombe (strain 972 / ATCC 24843) OX%3D284812)
ANN00760	Chr1	6284066	6291466	-	7401	0.234394	0.139042	0.177298	0.293224	Similar to Cfap57: Cilia- and flagella-associated protein 57 (Mus musculus OX%3D10090)
ANN00761	Chr1	6291747	6295410	-	3664	0.163072	0	0.23988	0.0363984	Protein of unknown function
ANN00762	Chr1	6305728	6306796	+	1069	1.41493	4.24802	1.52	1.15578	Protein of unknown function
ANN00763	Chr1	6307854	6309053	-	1200	7.12964	21.1884	7.84503	3.40741	Protein of unknown function
ANN00764	Chr1	6340506	6342189	+	1684	0.062624	0.22447	0	0	Similar to Ogfr: Opioid growth factor receptor (Mus musculus OX%3D10090)
ANN00765	Chr1	6346418	6347753	+	1336	0.702105	0.809307	0.240869	0.425272	Similar to JRKL: Jerky protein homolog-like (Homo sapiens OX%3D9606)
ANN00766	Chr1	6349753	6350299	+	547	0	0	0	0	Similar to PGBD4: PiggyBac transposable element-derived protein 4 (Homo sapiens OX%3D9606)
ANN00767	Chr1	6351008	6353033	+	2026	0.286325	0.21933	0.0480252	0	Similar to TY3B-I: Transposon Ty3-I Gag-Pol polyprotein (Saccharomyces cerevisiae (strain ATCC 204508 / S288c) OX%3D559292)
ANN00768	Chr1	6357757	6362984	+	5228	0.418279	0.360351	0.32512	0.418256	Protein of unknown function
ANN00769	Chr1	6365921	6371527	+	5607	0.188082	0.254872	0.111322	0.291928	Similar to DUT: Deoxyuridine 5'-triphosphate nucleotidohydrolase (Orf virus (strain NZ2) OX%3D10259)
ANN00770	Chr1	6386639	6387638	+	1000	0.234985	0.496544	0.163925	0	Similar to Transposable element Tcb1 transposase (Caenorhabditis briggsae OX%3D6238)
ANN00771	Chr1	6394270	6395803	-	1534	0.58497	0.714874	0.327776	0.316183	Protein of unknown function
ANN00772	Chr1	6399617	6404875	-	5259	0.568396	0.960891	0.52372	1.97252	Similar to TTLL6: Tubulin polyglutamylase TTLL6 (Homo sapiens OX%3D9606)
ANN00773	Chr1	6416297	6416764	+	468	0.225688	0	0	0	Protein of unknown function
ANN00774	Chr1	6416806	6418018	+	1213	1.06403	0.457585	0.695471	0.753245	Similar to LIAT1: Protein LIAT1 (Homo sapiens OX%3D9606)
ANN00775	Chr1	6419122	6421591	+	2470	0.365385	0.0510036	0.168956	0.579333	Protein of unknown function
ANN00776	Chr1	6421986	6423573	+	1588	0.601472	0.447823	0.20909	0.491245	Similar to GVQW3: Protein GVQW3 (Homo sapiens OX%3D9606)
ANN00777	Chr1	6426775	6427045	+	271	0.629901	0	0	0	Protein of unknown function
ANN00778	Chr1	6427089	6428412	+	1324	0.208216	0.0951836	0.20342	0	Protein of unknown function
ANN00779	Chr1	6433666	6435914	+	2249	0.0937688	0.197573	0.620852	0.492541	Protein of unknown function
ANN00780	Chr1	6438350	6443570	+	5221	0	0	0.104762	0	Similar to PGBD3: PiggyBac transposable element-derived protein 3 (Homo sapiens OX%3D9606)
ANN00781	Chr1	6488691	6492278	-	3588	0	0.0702135	0.0271121	0	Similar to TY3B-I: Transposon Ty3-I Gag-Pol polyprotein (Saccharomyces cerevisiae (strain ATCC 204508 / S288c) OX%3D559292)
ANN00782	Chr1	6492562	6493310	-	749	0.156919	0.395849	0.260029	0	Protein of unknown function
ANN00783	Chr1	6525545	6532547	-	7003	0.454469	0.302308	0.317019	0.0631742	Similar to olpB: Cell surface glycoprotein 1 (Hungateiclostridium thermocellum (strain ATCC 27405 / DSM 1237 / JCM 9322 / NBRC 103400 / NCIMB 10682 / NRRL B-4536 / VPI 7372) OX%3D203119)
ANN00784	Chr1	6568861	6574155	+	5295	3.63815	6.72237	3.65505	5.78566	Protein of unknown function
ANN00785	Chr1	6620458	6638202	-	17745	0.055491	9.24425	0.0676012	7.22824	Similar to Slc7a4: Cationic amino acid transporter 4 (Mus musculus OX%3D10090)
ANN00786	Chr1	6629253	6630911	+	1659	0	0	0	0	Protein of unknown function
ANN00787	Chr1	6641834	6644172	-	2339	0	0	0	0.034553	Similar to X-element\ORF2: Probable RNA-directed DNA polymerase from transposon X-element (Drosophila melanogaster OX%3D7227)
ANN00788	Chr1	6645356	6654002	+	8647	0.0610367	0.109548	0.0168721	0.182064	Protein of unknown function
ANN00789	Chr1	6654978	6660682	+	5705	0.0184776	0	0	0.0800257	Protein of unknown function
ANN00790	Chr1	6664970	6691991	-	27022	0.191107	0.327414	0.20471	0.175426	Similar to FBXL4: F-box/LRR-repeat protein 4 (Homo sapiens OX%3D9606)
ANN00791	Chr1	6693165	6693429	-	265	1.66378	1.12157	0.368375	1.22401	Similar to FBXL4: F-box/LRR-repeat protein 4 (Bos taurus OX%3D9913)
ANN00792	Chr1	6712320	6716092	-	3773	0.363759	0.106019	0.270728	1.15617	Similar to R1A1-element\ORF2: Putative 115 kDa protein in type-1 retrotransposable element R1DM (Drosophila melanogaster OX%3D7227)
ANN00793	Chr1	6753601	6755916	+	2316	1.68851	5.70393	3.05336	6.72601	Similar to slc44a2: Choline transporter-like protein 2 (Xenopus laevis OX%3D8355)
ANN00794	Chr1	6789415	6796940	-	7526	0.0280518	3.42219	0.0352578	3.65398	Similar to cmip: C-Maf-inducing protein (Xenopus laevis OX%3D8355)
ANN00795	Chr1	6804202	6809183	+	4982	13.3029	1.47275	13.1719	0.368709	Similar to nesd: Protein nessun dorma (Drosophila melanogaster OX%3D7227)
ANN00796	Chr1	6816521	6818350	+	1830	119.566	90.6914	125.65	86.2035	Similar to Dad1: Dolichyl-diphosphooligosaccharide--protein glycosyltransferase subunit DAD1 (Drosophila melanogaster OX%3D7227)
ANN00797	Chr1	6820469	6824011	-	3543	37.2267	47.2254	30.1656	51.2335	Similar to mRpL23: Probable 39S ribosomal protein L23%2C mitochondrial (Anopheles gambiae OX%3D7165)
ANN00798	Chr1	6824487	6827087	+	2601	21.8549	16.8461	26.0341	15.1647	Similar to Tmed5: Transmembrane emp24 domain-containing protein 5 (Rattus norvegicus OX%3D10116)
ANN00799	Chr1	6831780	6838260	+	6481	3.03732	3.49478	2.97661	3.0824	Similar to PARP16: Protein mono-ADP-ribosyltransferase PARP16 (Homo sapiens OX%3D9606)
ANN00800	Chr1	6834417	6835953	-	1537	0	0	0	0	Similar to R1A1-element\ORF2: Putative 115 kDa protein in type-1 retrotransposable element R1DM (Drosophila melanogaster OX%3D7227)
ANN00801	Chr1	6850530	6853786	-	3257	0	0.288733	0.0448024	0.0955964	Similar to Sema1a: Semaphorin-1A (Drosophila melanogaster OX%3D7227)
ANN00802	Chr1	6856367	6863878	-	7512	0.133324	2.08154	0.162869	2.0876	Similar to Sema1a: Semaphorin-1A (Drosophila melanogaster OX%3D7227)
ANN00803	Chr1	6876269	6879179	-	2911	0	0.0508755	0	0	Similar to RTase: Probable RNA-directed DNA polymerase from transposon BS (Drosophila melanogaster OX%3D7227)
ANN00804	Chr1	6918655	6921712	-	3058	0	0.157331	0.222722	0.174617	Similar to pol: Retrovirus-related Pol polyprotein from type-2 retrotransposable element R2DM (Drosophila melanogaster OX%3D7227)
ANN00805	Chr1	6933406	6934738	+	1333	0	0	0	0	Protein of unknown function
ANN00806	Chr1	6934905	6935466	+	562	0.167049	0	0	0.288003	Protein of unknown function
ANN00807	Chr1	6939672	6941815	-	2144	0.142094	0.150188	0.0529523	0.379065	Protein of unknown function
ANN00808	Chr1	6977967	6979446	-	1480	0.0633633	0	0.0657545	0	Protein of unknown function
ANN00809	Chr1	6987498	6991551	+	4054	0.104091	0.196343	0.0549349	0	Similar to R1A1-element\ORF2: Putative 115 kDa protein in type-1 retrotransposable element R1DM (Drosophila melanogaster OX%3D7227)
ANN00810	Chr1	6998183	6999071	+	889	0	0	0.127789	0	Protein of unknown function
ANN00811	Chr1	6999983	7001056	+	1074	0	0	0.101747	0.497487	Protein of unknown function
ANN00812	Chr1	7099070	7100535	-	1466	0.255888	0.0859576	0.630673	0.227521	Protein of unknown function
ANN00813	Chr1	7129276	7133279	+	4004	0	0.0314584	0.028348	0	Similar to RTase: Probable RNA-directed DNA polymerase from transposon BS (Drosophila melanogaster OX%3D7227)
ANN00814	Chr1	7139311	7140790	+	1480	0	0	0.0738162	0	Protein of unknown function
ANN00815	Chr1	7150878	7152399	+	1522	0	0.121541	0	0.116985	Similar to Retrotransposable element SLACS 132 kDa protein (Trypanosoma brucei gambiense OX%3D31285)
ANN00816	Chr1	7152561	7158204	+	5644	0.0269809	0	0.0365807	0.0315319	Similar to Tf2-11: Transposon Tf2-11 polyprotein (Schizosaccharomyces pombe (strain 972 / ATCC 24843) OX%3D284812)
ANN00817	Chr1	7227048	7231705	+	4658	0	0.0635807	0.0208828	0.038208	Similar to RTase: Probable RNA-directed DNA polymerase from transposon BS (Drosophila melanogaster OX%3D7227)
ANN00818	Chr1	7253283	7255422	-	2140	13.4309	31.3371	15.543	26.8639	Similar to AGAP010343: CTL-like protein 2 (Anopheles gambiae OX%3D7165)
ANN00819	Chr1	7270385	7271738	+	1354	0.0778981	0.136633	0.071878	0	Protein of unknown function
ANN00820	Chr1	7282054	7282357	-	304	0	0	0	0	Protein of unknown function
ANN00821	Chr1	7291464	7293362	+	1899	0.253031	0	0	0	Similar to Retrovirus-related Pol polyprotein from type-1 retrotransposable element R1 (Fragment) (Bradysia coprophila OX%3D38358)
ANN00822	Chr1	7293455	7295503	+	2049	0	0	0	0	Similar to Retrovirus-related Pol polyprotein from type-1 retrotransposable element R2 (Fragment) (Nasonia vitripennis OX%3D7425)
ANN00823	Chr1	7296654	7297005	-	352	0	0.210894	0	0.253468	Similar to tc3a: Transposable element Tc3 transposase (Caenorhabditis elegans OX%3D6239)
ANN00824	Chr1	7311573	7314538	-	2966	4.8908	11.7919	6.88913	7.3971	Similar to rap1b: Ras-related protein Rap-1b (Danio rerio OX%3D7955)
ANN00825	Chr1	7317208	7321749	+	4542	0.782008	0.224217	0.798952	0.0587216	Similar to X-element\ORF2: Probable RNA-directed DNA polymerase from transposon X-element (Drosophila melanogaster OX%3D7227)
ANN00826	Chr1	7324102	7329816	+	5715	0.101527	0.23457	0.0949515	0.0141381	Protein of unknown function
ANN00827	Chr1	7333745	7340210	+	6466	0.131367	0.168267	0.0758109	0.0749743	Protein of unknown function
ANN00828	Chr1	7356930	7358831	-	1902	2.99346	2.46296	3.63174	2.32654	Protein of unknown function
ANN00829	Chr1	7363141	7374465	-	11325	0.035695	0.0545976	0.0232394	0.106683	Similar to RTase: Probable RNA-directed DNA polymerase from transposon BS (Drosophila melanogaster OX%3D7227)
ANN00830	Chr1	7397839	7403231	-	5393	240.4	158.905	206.803	150.01	Similar to PRDX5: Peroxiredoxin-5%2C mitochondrial (Homo sapiens OX%3D9606)
ANN00831	Chr1	7452919	7453825	+	907	0	0	0	0	Protein of unknown function
ANN00832	Chr1	7461579	7478313	-	16735	0.0202989	0.0413701	0.0252847	0.0407107	Similar to Gonadotropin-releasing hormone II receptor (Clarias gariepinus OX%3D13013)
ANN00833	Chr1	7464312	7467520	+	3209	0	0	0	0	Protein of unknown function
ANN00834	Chr1	7474816	7476116	+	1301	0	0	0	0	Protein of unknown function
ANN00835	Chr1	7517145	7522464	+	5320	0.301779	0	0.413479	0.101428	Protein of unknown function
ANN00836	Chr1	7523100	7523845	-	746	0	0.169031	0.152318	0	Protein of unknown function
ANN00837	Chr1	7524387	7524914	+	528	0	0	0	0	Similar to Transposable element Tcb2 transposase (Caenorhabditis briggsae OX%3D6238)
ANN00838	Chr1	7527848	7529483	+	1636	0	0	0	0	Similar to pol: Retrovirus-related Pol polyprotein from type-2 retrotransposable element R2DM (Drosophila melanogaster OX%3D7227)
ANN00839	Chr1	7537823	7543216	+	5394	0.100989	0.0274518	0.0623267	0.108308	Protein of unknown function
ANN00840	Chr1	7545087	7545963	-	877	0	0	0	0	Similar to K02A2.6: Uncharacterized protein K02A2.6 (Caenorhabditis elegans OX%3D6239)
ANN00841	Chr1	7545805	7550596	+	4792	0.0195605	0.200776	0.0689138	0	Protein of unknown function
ANN00842	Chr1	7558408	7558957	-	550	0.191978	0	0.276572	0	Protein of unknown function
ANN00843	Chr1	7560438	7560976	+	539	0	0	0	0	Similar to PGBD4: PiggyBac transposable element-derived protein 4 (Homo sapiens OX%3D9606)
ANN00844	Chr1	7561022	7561557	+	536	0.175167	0	0.0908888	0.551209	Protein of unknown function
ANN00845	Chr1	7587102	7591985	+	4884	1.1787	0.505493	1.09513	0.242591	Similar to RTase: Probable RNA-directed DNA polymerase from transposon BS (Drosophila melanogaster OX%3D7227)
ANN00846	Chr1	7594136	7596359	-	2224	0	0.0665982	0	0.0599763	Similar to LINE-1 retrotransposable element ORF2 protein (Homo sapiens OX%3D9606)
ANN00847	Chr1	7601098	7603901	-	2804	0.108742	0.105635	0.0562967	0.111046	Protein of unknown function
ANN00848	Chr1	7627575	7631260	-	3686	0.0429424	0.0250834	0.0307943	0.0663767	Protein of unknown function
ANN00849	Chr1	7635773	7645292	-	9520	0.138432	0.104571	0.156159	0.131446	Similar to RTase: Probable RNA-directed DNA polymerase from transposon BS (Drosophila melanogaster OX%3D7227)
ANN00850	Chr1	7671387	7672675	-	1289	0.336848	0.545528	0.0847625	0.241663	Similar to GVQW3: Protein GVQW3 (Homo sapiens OX%3D9606)
ANN00851	Chr1	7673034	7676661	-	3628	0.0290588	0.0509689	0.0602008	0.0245292	Protein of unknown function
ANN00852	Chr1	7682351	7682573	-	223	0.949515	0	0	0	Protein of unknown function
ANN00853	Chr1	7720562	7720990	-	429	0.246253	0	0	0	Protein of unknown function
ANN00854	Chr1	7723186	7723735	+	550	0	0.336729	0	0	Protein of unknown function
ANN00855	Chr1	7737337	7741061	+	3725	0.0818485	0.0507229	0	0	Protein of unknown function
ANN00856	Chr1	7741594	7742429	+	836	0	26.2196	0.414778	16.9345	Similar to CMIP: C-Maf-inducing protein (Homo sapiens OX%3D9606)
ANN00857	Chr1	7750670	7762724	+	12055	0.522028	0.530187	0.435632	0.389566	Similar to Gtf2h2: General transcription factor IIH subunit 2 (Rattus norvegicus OX%3D10116)
ANN00858	Chr1	7775907	7776745	+	839	1.30075	0.459208	0.645458	1.32837	Similar to MRPL54: 39S ribosomal protein L54%2C mitochondrial (Homo sapiens OX%3D9606)
ANN00859	Chr1	7806258	7808412	+	2155	0	0	0	0	Similar to RTase: Probable RNA-directed DNA polymerase from transposon BS (Drosophila melanogaster OX%3D7227)
ANN00860	Chr1	7824814	7827680	+	2867	0	0.15238	0.0380928	0	Similar to pol: RNA-directed DNA polymerase from mobile element jockey (Drosophila melanogaster OX%3D7227)
ANN00861	Chr1	7846582	7847874	+	1293	0	0	0	0.154792	Protein of unknown function
ANN00862	Chr1	7857796	7858497	+	702	0	0	0	0	Protein of unknown function
ANN00863	Chr1	7895151	7898451	+	3301	0.234458	0.134589	0.418534	0.0943218	Similar to jockey\pol: RNA-directed DNA polymerase from mobile element jockey (Drosophila funebris OX%3D7221)
ANN00864	Chr1	7956360	7959363	+	3004	0	0.0615599	0.0188939	0	Similar to pol: RNA-directed DNA polymerase from mobile element jockey (Drosophila melanogaster OX%3D7227)
ANN00865	Chr1	7983064	7997157	+	14094	0.135101	0.270761	0.190493	0.358845	Protein of unknown function
ANN00866	Chr1	8004870	8006530	+	1661	0.642491	1.19482	0.433969	0.177649	Similar to ARHGEF28: Rho guanine nucleotide exchange factor 28 (Homo sapiens OX%3D9606)
ANN00867	Chr1	8025049	8038332	+	13284	0.173862	0.176601	0.166786	0.0984133	Protein of unknown function
ANN00868	Chr1	8074877	8078099	+	3223	0.110864	0.427225	0.0880485	0.201976	Similar to F52C9.6: Putative uncharacterized transposon-derived protein F52C9.6 (Caenorhabditis elegans OX%3D6239)
ANN00869	Chr1	8083125	8085428	-	2304	0	0	0	0.398359	Similar to LINE-1 retrotransposable element ORF2 protein (Homo sapiens OX%3D9606)
ANN00870	Chr1	8087157	8089361	-	2205	0	0.485226	0.191223	1.04038	Similar to pif1: ATP-dependent DNA helicase pif1 (Bdellovibrio bacteriovorus (strain ATCC 15356 / DSM 50701 / NCIB 9529 / HD100) OX%3D264462)
ANN00871	Chr1	8118843	8148179	+	29337	1.00819	0.890959	1.46372	0.600574	Similar to MARS1: Methionine--tRNA ligase%2C cytoplasmic (Homo sapiens OX%3D9606)
ANN00872	Chr1	8161613	8182488	+	20876	1.3107	0.666037	1.37858	0.660179	Similar to Ddx28: Probable ATP-dependent RNA helicase DDX28 (Mus musculus OX%3D10090)
ANN00873	Chr1	8185871	8191674	+	5804	0.0161493	0.0255123	0.0167587	0	Similar to HKR1: Signaling mucin HKR1 (Saccharomyces cerevisiae (strain ATCC 204508 / S288c) OX%3D559292)
ANN00874	Chr1	8214195	8261981	+	47787	1.53226	1.02006	1.58812	0.726278	Similar to Msh2: DNA mismatch repair protein Msh2 (Rattus norvegicus OX%3D10116)
ANN00875	Chr1	8283376	8298302	+	14927	1.90676	2.35258	2.00609	1.2674	Similar to dbnl-a: Drebrin-like protein A (Xenopus laevis OX%3D8355)
ANN00876	Chr1	8312801	8316206	-	3406	16.9229	6.08212	17.6786	5.1426	Protein of unknown function
ANN00877	Chr1	8326827	8329814	-	2988	21.362	7.18647	22.4526	4.99204	Similar to Polr2e: DNA-directed RNA polymerases I%2C II%2C and III subunit RPABC1 (Rattus norvegicus OX%3D10116)
ANN00878	Chr1	8338571	8342999	-	4429	0.181356	0.152936	0.281816	0.151947	Protein of unknown function
ANN00879	Chr1	8343048	8343758	-	711	0	0	0	0	Protein of unknown function
ANN00880	Chr1	8343845	8345448	-	1604	0.197433	0.057662	0	0.208088	Protein of unknown function
ANN00881	Chr1	8439779	8447556	-	7778	0.628502	0.67248	0.651891	0.571659	Similar to xpo6: Exportin-6 (Danio rerio OX%3D7955)
ANN00882	Chr1	8459615	8461088	-	1474	138.313	119.01	131.082	106.304	Similar to Akt1: RAC serine/threonine-protein kinase (Drosophila melanogaster OX%3D7227)
ANN00883	Chr1	8467995	8486937	-	18943	0.704675	0.810065	1.03305	0.502366	Similar to xpo6: Exportin-6 (Danio rerio OX%3D7955)
ANN00884	Chr1	8481071	8483822	+	2752	0	0	0	0	Similar to RTase: Probable RNA-directed DNA polymerase from transposon BS (Drosophila melanogaster OX%3D7227)
ANN00885	Chr1	8524646	8536241	+	11596	20.8018	11.8946	16.5207	15.2528	Similar to MRPL4: 39S ribosomal protein L4%2C mitochondrial (Homo sapiens OX%3D9606)
ANN00886	Chr1	8557252	8565078	+	7827	1.46403	2.22998	2.565	2.23085	Similar to Tufm: Elongation factor Tu%2C mitochondrial (Mus musculus OX%3D10090)
ANN00887	Chr1	8583770	8593398	-	9629	0.036494	0.146457	0.153796	0.177109	Protein of unknown function
ANN00888	Chr1	8615654	8639819	+	24166	0.165636	0.537098	0.237381	0.328462	Similar to infB: Translation initiation factor IF-2 (Desulfitobacterium hafniense (strain Y51) OX%3D138119)
ANN00889	Chr1	8674915	8727559	+	52645	0.889671	0.736457	1.03998	0.651912	Similar to TTC37: Tetratricopeptide repeat protein 37 (Homo sapiens OX%3D9606)
ANN00890	Chr1	8720937	8724117	-	3181	0	0	0	0	Similar to RTase: Probable RNA-directed DNA polymerase from transposon BS (Drosophila melanogaster OX%3D7227)
ANN00891	Chr1	8727591	8733255	+	5665	2.72344	2.79994	3.34178	2.01341	Protein of unknown function
ANN00892	Chr1	8739026	8744749	+	5724	0.016375	0.0840398	0	0.0232968	Protein of unknown function
ANN00893	Chr1	8750059	8752831	+	2773	8.89912	11.2999	8.60691	7.35525	Similar to Xpac: DNA repair protein complementing XP-A cells homolog (Drosophila melanogaster OX%3D7227)
ANN00894	Chr1	8757930	8778391	-	20462	2.56632	1.3365	4.13177	1.44977	Similar to CASP2: Caspase-2 (Gallus gallus OX%3D9031)
ANN00895	Chr1	8783525	8784587	+	1063	0	0	0	0	Protein of unknown function
ANN00896	Chr1	8790458	8804334	+	13877	0.106811	0.488419	0.29931	0.544583	Protein of unknown function
ANN00897	Chr1	8809869	8815571	+	5703	0.578483	0.27196	0.912502	1.39893	Similar to asrgl1: Isoaspartyl peptidase/L-asparaginase (Xenopus laevis OX%3D8355)
ANN00898	Chr1	8837934	8869817	+	31884	2.93762	3.48215	2.82066	2.88955	Similar to wdr24: GATOR complex protein WDR24 (Xenopus laevis OX%3D8355)
ANN00899	Chr1	8891292	8894526	-	3235	0	0	0	0	Similar to X-element\ORF2: Probable RNA-directed DNA polymerase from transposon X-element (Drosophila melanogaster OX%3D7227)
ANN00900	Chr1	8916219	8920160	+	3942	0.517537	0.140724	0.577509	0.492673	Similar to GA20639: Probable isoaspartyl peptidase/L-asparaginase GA20639 (Drosophila pseudoobscura pseudoobscura OX%3D46245)
ANN00901	Chr1	8933884	8936817	+	2934	0.783102	0.738243	0.91846	0.538635	Similar to wdr24: GATOR complex protein WDR24 (Danio rerio OX%3D7955)
ANN00902	Chr1	8939961	8960056	+	20096	0.298628	0.297606	0.308897	0.205528	Similar to WDR24: GATOR complex protein WDR24 (Gallus gallus OX%3D9031)
ANN00903	Chr1	8969031	8976154	-	7124	0.346328	0.416734	0.646561	0.608735	Similar to Rala: Ras-related protein Ral-a (Drosophila melanogaster OX%3D7227)
ANN00904	Chr1	8979960	8984528	+	4569	11.4176	13.0576	12.9112	12.6046	Similar to l(1)G0196: Inositol hexakisphosphate and diphosphoinositol-pentakisphosphate kinase (Drosophila melanogaster OX%3D7227)
ANN00905	Chr1	8994407	8997041	+	2635	12.623	20.3315	11.9174	15.2087	Similar to Sec5: Exocyst complex component 2 (Drosophila melanogaster OX%3D7227)
ANN00906	Chr1	8998149	8998509	+	361	110.553	262.705	100.939	208.1	Protein of unknown function
ANN00907	Chr1	9001262	9004749	+	3488	0.833722	1.25958	1.28288	0.706425	Protein of unknown function
ANN00908	Chr1	9007409	9013605	-	6197	0	0	0	0.0260765	Similar to Retrovirus-related Pol polyprotein from type-1 retrotransposable element R1 (Fragment) (Bradysia coprophila OX%3D38358)
ANN00909	Chr1	9013653	9014322	-	670	0	0	0.145368	0.265971	Protein of unknown function
ANN00910	Chr1	9018522	9031233	-	12712	0.420858	0.640196	0.519413	0.415521	Similar to TMEM19: Transmembrane protein 19 (Homo sapiens OX%3D9606)
ANN00911	Chr1	9032617	9056650	+	24034	0.973338	3.45346	1.24557	3.24732	Similar to Rop: Protein ROP (Drosophila melanogaster OX%3D7227)
ANN00912	Chr1	9058842	9061906	-	3065	4.48687	30.5551	5.07846	24.643	Similar to Retrovirus-related Pol polyprotein from type-1 retrotransposable element R2 (Fragment) (Popillia japonica OX%3D7064)
ANN00913	Chr1	9071130	9072279	+	1150	0.254852	6.83378	0	5.62187	Protein of unknown function
ANN00914	Chr1	9076540	9095987	+	19448	3.19503	5.8643	1.26196	4.94752	Similar to Nep1: Neprilysin-1 (Drosophila melanogaster OX%3D7227)
ANN00915	Chr1	9098875	9165249	+	66375	1.14465	0.760247	1.60283	0.671287	Similar to Tpr: Nucleoprotein TPR (Rattus norvegicus OX%3D10116)
ANN00916	Chr1	9182788	9217243	-	34456	0.144479	0.10583	0.120984	0.183968	Similar to Akap13: A-kinase anchor protein 13 (Mus musculus OX%3D10090)
ANN00917	Chr1	9211202	9223216	+	12015	0.109273	0.101024	0.00908724	0.0941392	Protein of unknown function
ANN00918	Chr1	9223288	9225694	+	2407	0.153443	0.479983	0.108484	0	Protein of unknown function
ANN00919	Chr1	9225738	9231231	+	5494	0.354035	0.11792	0.18443	0.116982	Protein of unknown function
ANN00920	Chr1	9236748	9243573	+	6826	0.211212	0.0650187	0.0931137	0.0807872	Protein of unknown function
ANN00921	Chr1	9243363	9249866	-	6504	0.229754	0.240211	0.306701	0.225519	Protein of unknown function
ANN00922	Chr1	9273218	9283757	+	10540	0.499199	1.12013	0.95625	1.21738	Similar to RTase: Probable RNA-directed DNA polymerase from transposon BS (Drosophila melanogaster OX%3D7227)
ANN00923	Chr1	9284408	9287571	+	3164	5.49087	10.1845	5.88211	10.277	Protein of unknown function
ANN00924	Chr1	9365317	9368333	+	3017	0	0	0.0361983	0.176827	Similar to X-element\ORF2: Probable RNA-directed DNA polymerase from transposon X-element (Drosophila melanogaster OX%3D7227)
ANN00925	Chr1	9389676	9392797	+	3122	0.131432	0.433963	0.120522	0.495238	Similar to Ets21C: DNA-binding protein D-ETS-6 (Drosophila melanogaster OX%3D7227)
ANN00926	Chr1	9397953	9416294	-	18342	0.75406	0.181206	1.10613	0.289122	Similar to dib: Cytochrome P450 302a1%2C mitochondrial (Drosophila melanogaster OX%3D7227)
ANN00927	Chr1	9430122	9434622	-	4501	0.0964135	0.304277	0.109393	1.41734	Protein of unknown function
ANN00928	Chr1	9446952	9454981	-	8030	1.05425	3.35921	1.56949	3.0056	Similar to EcR: Ecdysone receptor (Aedes aegypti OX%3D7159)
ANN00929	Chr1	9515340	9521636	-	6297	0	0	0	0.0795861	Protein of unknown function
ANN00930	Chr1	9525955	9529295	-	3341	0	0	0	0	Similar to GTF2IRD2: General transcription factor II-I repeat domain-containing protein 2A (Homo sapiens OX%3D9606)
ANN00931	Chr1	9530038	9535029	-	4992	0.0235174	0.0697254	0.0608447	0.0267136	Similar to X-element\ORF2: Probable RNA-directed DNA polymerase from transposon X-element (Drosophila melanogaster OX%3D7227)
ANN00932	Chr1	9604701	9605715	-	1015	0	0	0	0	Protein of unknown function
ANN00933	Chr1	9653302	9655507	+	2206	0.616624	1.05744	0.435241	0.117333	Similar to OARD1: ADP-ribose glycohydrolase OARD1 (Bos taurus OX%3D9913)
ANN00934	Chr1	9655778	9658556	+	2779	0.113926	0	0.128367	0.0290802	Similar to Tf2-6: Transposon Tf2-6 polyprotein (Schizosaccharomyces pombe (strain 972 / ATCC 24843) OX%3D284812)
ANN00935	Chr1	9764439	9771250	+	6812	1.3674	1.11345	1.78966	1.28761	Similar to Taf7: Transcription initiation factor TFIID subunit 7 (Drosophila melanogaster OX%3D7227)
ANN00936	Chr1	9778887	9779879	+	993	0.0944701	0	0.165082	0	Similar to CCDC15: Coiled-coil domain-containing protein 15 (Homo sapiens OX%3D9606)
ANN00937	Chr1	9782092	9783824	-	1733	4.10733	2.10681	3.07465	1.25753	Similar to USB1: U6 snRNA phosphodiesterase (Bos taurus OX%3D9913)
ANN00938	Chr1	9786494	9794674	+	8181	2.31872	2.04327	2.93515	2.00021	Similar to RTase: Probable RNA-directed DNA polymerase from transposon BS (Drosophila melanogaster OX%3D7227)
ANN00939	Chr1	9807015	9807435	+	421	4.47738	9.60977	9.51213	6.30163	Protein of unknown function
ANN00940	Chr1	9808152	9818909	+	10758	3.8529	4.31078	3.43796	3.30669	Protein of unknown function
ANN00941	Chr1	9822202	9822673	+	472	0	0	0	0	Protein of unknown function
ANN00942	Chr1	9823308	9825946	+	2639	0.0799061	0	0	0	Similar to RTase: Probable RNA-directed DNA polymerase from transposon BS (Drosophila melanogaster OX%3D7227)
ANN00943	Chr1	9861819	9864443	-	2625	5.60547	2.72804	5.5519	3.13632	Similar to USB1: U6 snRNA phosphodiesterase (Bos taurus OX%3D9913)
ANN00944	Chr1	9866172	9867411	-	1240	0.160703	0	0	0	Similar to HARBI1: Putative nuclease HARBI1 (Homo sapiens OX%3D9606)
ANN00945	Chr1	9885397	9886331	+	935	48.5244	48.5986	64.8524	49.7618	Protein of unknown function
ANN00946	Chr1	9902556	9903096	+	541	17.2098	17.843	27.896	23.0887	Protein of unknown function
ANN00947	Chr1	9907187	9911819	+	4633	0.77899	1.11772	1.12266	0.964786	Protein of unknown function
ANN00948	Chr1	9912382	9927656	-	15275	9.72384	14.1302	9.26113	10.4998	Similar to RTase: Probable RNA-directed DNA polymerase from transposon BS (Drosophila melanogaster OX%3D7227)
ANN00949	Chr1	9917301	9923116	+	5816	0	0	0	0	Protein of unknown function
ANN00950	Chr1	9970154	9973921	-	3768	0.0373166	0.0167146	0.168702	0.0745357	Similar to Phospholipase A1 (Vespula vulgaris OX%3D7454)
ANN00951	Chr1	9976818	9982591	-	5774	0.0527467	0.0576671	0.286074	0.109891	Similar to liph: Lipase member H (Xenopus tropicalis OX%3D8364)
ANN00952	Chr1	9991366	9995592	-	4227	0.146906	0.0297984	0.102551	0.0157746	Protein of unknown function
ANN00953	Chr1	9996635	10001248	-	4614	0.0228476	0	0	0	Similar to pol: Retrovirus-related Pol polyprotein from transposon 17.6 (Drosophila melanogaster OX%3D7227)
ANN00954	Chr1	10020344	10024042	+	3699	0.110925	0.134034	0.206461	0.0841703	Similar to CG3800: CCHC-type zinc finger protein CG3800 (Drosophila melanogaster OX%3D7227)
ANN00955	Chr1	10043611	10044085	-	475	0	0	0	0	Protein of unknown function
ANN00956	Chr1	10044106	10053332	-	9227	0.0292249	0	0	0.0192862	Protein of unknown function
ANN00957	Chr1	10066872	10068722	+	1851	0	0	0.0295065	0	Similar to PGBD3: PiggyBac transposable element-derived protein 3 (Homo sapiens OX%3D9606)
ANN00958	Chr1	10074950	10076379	+	1430	0.0737552	0.0881231	0.220853	0.217818	Similar to PGBD4: PiggyBac transposable element-derived protein 4 (Homo sapiens OX%3D9606)
ANN00959	Chr1	10076461	10077930	+	1470	0.327242	0.752801	0.375157	2.3741	Similar to gag-pol: Gag-Pol polyprotein (Xenotropic MuLV-related virus (isolate VP42) OX%3D356664)
ANN00960	Chr1	10078802	10084145	-	5344	0.00986302	0	0	0	Similar to pol: Retrovirus-related Pol polyprotein from transposon 17.6 (Drosophila melanogaster OX%3D7227)
ANN00961	Chr1	10088749	10089253	+	505	0	0	0	0	Protein of unknown function
ANN00962	Chr1	10089516	10092724	+	3209	0.0456398	0.028813	0	0	Similar to jockey\pol: RNA-directed DNA polymerase from mobile element jockey (Drosophila funebris OX%3D7221)
ANN00963	Chr1	10118586	10135641	-	17056	2.16816	2.52543	2.37634	1.9429	Similar to Pnpla8: Calcium-independent phospholipase A2-gamma (Mus musculus OX%3D10090)
ANN00964	Chr1	10147200	10152365	-	5166	0.559294	79.8385	0.309266	70.2527	Similar to SCG5: Neuroendocrine protein 7B2 (Homo sapiens OX%3D9606)
ANN00965	Chr1	10153306	10154998	+	1693	0	0	0.0574769	0	Protein of unknown function
ANN00966	Chr1	10206162	10210914	-	4753	0.039442	0	0.0238798	0	Similar to X-element\ORF2: Probable RNA-directed DNA polymerase from transposon X-element (Drosophila melanogaster OX%3D7227)
ANN00967	Chr1	10211908	10212943	+	1036	0	0	0	0	Similar to X-element\ORF2: Probable RNA-directed DNA polymerase from transposon X-element (Drosophila melanogaster OX%3D7227)
ANN00968	Chr1	10220039	10222018	+	1980	0.0473544	0.308342	0.0849237	0	Similar to RTase: Probable RNA-directed DNA polymerase from transposon BS (Drosophila melanogaster OX%3D7227)
ANN00969	Chr1	10242718	10246061	+	3344	0.122704	0.0552989	0	0.128096	Similar to CG3800: CCHC-type zinc finger protein CG3800 (Drosophila melanogaster OX%3D7227)
ANN00970	Chr1	10287603	10291930	+	4328	0.0230079	0.382445	0.0477063	0.0308129	Similar to jockey\pol: RNA-directed DNA polymerase from mobile element jockey (Drosophila funebris OX%3D7221)
ANN00971	Chr1	10292573	10293572	+	1000	0.410611	0.296392	0.218567	0.161731	Similar to Transposable element Tcb2 transposase (Caenorhabditis briggsae OX%3D6238)
ANN00972	Chr1	10295042	10297557	+	2516	0	0	0.04512	0.128485	Protein of unknown function
ANN00973	Chr1	10311517	10313017	+	1501	0.257693	0.0986985	0.129668	0	Similar to pol: RNA-directed DNA polymerase from mobile element jockey (Drosophila melanogaster OX%3D7227)
ANN00974	Chr1	10362674	10367219	-	4546	0.177805	0.237717	0.0570634	0.0746984	Protein of unknown function
ANN00975	Chr1	10368927	10370061	-	1135	0.046471	0.0652768	0.498442	0	Similar to PGBD3: PiggyBac transposable element-derived protein 3 (Homo sapiens OX%3D9606)
ANN00976	Chr1	10370520	10372329	-	1810	0	0	0	0	Similar to Pogk: Pogo transposable element with KRAB domain (Mus musculus OX%3D10090)
ANN00977	Chr1	10373603	10374260	-	658	0.321293	0.140688	0.17272	1.66721	Similar to PGBD2: PiggyBac transposable element-derived protein 2 (Homo sapiens OX%3D9606)
ANN00978	Chr1	10374652	10384489	-	9838	0.0518202	0.21899	0.109097	0.174554	Similar to Pogk: Pogo transposable element with KRAB domain (Mus musculus OX%3D10090)
ANN00979	Chr1	10391098	10394871	-	3774	0.602569	1.08478	0.491665	0.253337	Similar to Zswim3: Zinc finger SWIM domain-containing protein 3 (Mus musculus OX%3D10090)
ANN00980	Chr1	10395593	10396841	-	1249	0.169142	0	0.126442	0.129463	Protein of unknown function
ANN00981	Chr1	10398139	10398562	-	424	0	0	0	0	Similar to Transposable element Tcb1 transposase (Caenorhabditis briggsae OX%3D6238)
ANN00982	Chr1	10398685	10403871	-	5187	0.372912	0.681978	0.289761	0.304679	Similar to GVQW3: Protein GVQW3 (Homo sapiens OX%3D9606)
ANN00983	Chr1	10406417	10408868	-	2452	0	0.120806	0	0	Similar to TTLL6: Tubulin polyglutamylase TTLL6 (Homo sapiens OX%3D9606)
ANN00984	Chr1	10439882	10441278	-	1397	0	0	0.0812871	0	Protein of unknown function
ANN00985	Chr1	10456929	10458763	-	1835	0	0	0.123748	0	Protein of unknown function
ANN00986	Chr1	10461573	10464510	-	2938	0	0.0252039	0.0662247	0	Protein of unknown function
ANN00987	Chr1	10476114	10479168	+	3055	0	0	0	0	Similar to RTase: Probable RNA-directed DNA polymerase from transposon BS (Drosophila melanogaster OX%3D7227)
ANN00988	Chr1	10495284	10498230	-	2947	0.131208	0.396991	0.40554	0.792911	Similar to Zbed4: Zinc finger BED domain-containing protein 4 (Mus musculus OX%3D10090)
ANN00989	Chr1	10510452	10510818	-	367	0	0	0.918382	0	Similar to PGBD3: PiggyBac transposable element-derived protein 3 (Homo sapiens OX%3D9606)
ANN00990	Chr1	10511538	10517357	-	5820	0.0271686	0	0.0529264	0.195132	Protein of unknown function
ANN00991	Chr1	10517942	10526237	-	8296	0.228775	0.224899	0.364908	0.288415	Similar to ERCC6: Chimeric ERCC6-PGBD3 protein (Homo sapiens OX%3D9606)
ANN00992	Chr1	10540082	10540415	+	334	0	0	0	0	Similar to ZBED8: Protein ZBED8 (Bos taurus OX%3D9913)
ANN00993	Chr1	10578919	10591795	-	12877	0.243016	2.50389	0.342867	1.7008	Protein of unknown function
ANN00994	Chr1	10613899	10617474	+	3576	0	0	0	0	Similar to pol: Retrovirus-related Pol polyprotein from transposon 17.6 (Drosophila melanogaster OX%3D7227)
ANN00995	Chr1	10623203	10627960	+	4758	0.167585	0.14631	0.167217	0.0280276	Protein of unknown function
ANN00996	Chr1	10628694	10636255	+	7562	29.3142	9.15898	26.201	4.41661	Similar to MDH1: Malate dehydrogenase%2C cytoplasmic (Homo sapiens OX%3D9606)
ANN00997	Chr1	10640711	10647289	+	6579	1.15876	0.905069	1.83749	0.447784	Similar to frtz: WD repeat-containing and planar cell polarity effector protein fritz (Drosophila melanogaster OX%3D7227)
ANN00998	Chr1	10645262	10648134	-	2873	0	0	0.0197557	0.0541891	Similar to X-element\ORF2: Probable RNA-directed DNA polymerase from transposon X-element (Drosophila melanogaster OX%3D7227)
ANN00999	Chr1	10648320	10648920	+	601	0.800422	4.09621	0.641256	0.491495	Protein of unknown function
ANN01000	Chr1	10648989	10661736	+	12748	0.527337	0.208835	0.492748	0.487987	Similar to jockey\pol: RNA-directed DNA polymerase from mobile element jockey (Drosophila funebris OX%3D7221)
ANN01001	Chr1	10668124	10676182	-	8059	3.27941	5.08796	5.55429	8.15915	Similar to Mrpl48: 39S ribosomal protein L48%2C mitochondrial (Mus musculus OX%3D10090)
ANN01002	Chr1	10711036	10718580	+	7545	0	0.0196246	0.0144716	0.021417	Similar to X-element\ORF2: Probable RNA-directed DNA polymerase from transposon X-element (Drosophila melanogaster OX%3D7227)
ANN01003	Chr1	10733843	10748949	+	15107	0.102415	0.714453	0.135817	0.636252	Similar to 5-hydroxytryptamine receptor (Bombyx mori OX%3D7091)
ANN01004	Chr1	10758722	10765063	-	6342	1.48551	0.64027	3.13687	3.38067	Similar to Enhancer of rudimentary homolog (Aedes aegypti OX%3D7159)
ANN01005	Chr1	10766809	10771726	+	4918	0.746076	0.614064	0.806418	0.716127	Similar to Men1: Menin (Rattus norvegicus OX%3D10116)
ANN01006	Chr1	10793931	10806136	-	12206	0.137221	0.812623	0.0992533	0.752237	Similar to 5-hydroxytryptamine receptor (Bombyx mori OX%3D7091)
ANN01007	Chr1	10840460	10843703	+	3244	0	0	0.0336645	0	Protein of unknown function
ANN01008	Chr1	10849328	10853456	+	4129	0	0	0	0	Similar to R1A1-element\ORF2: Putative 115 kDa protein in type-1 retrotransposable element R1DM (Drosophila melanogaster OX%3D7227)
ANN01009	Chr1	10891329	10926367	-	35039	0.0120407	0.0544835	0.00965464	0.0730054	Similar to pol: Retrovirus-related Pol polyprotein from transposon 17.6 (Drosophila melanogaster OX%3D7227)
ANN01010	Chr1	10926681	10938117	-	11437	0.0235902	0.0174844	0.00992278	0	Protein of unknown function
ANN01011	Chr1	10938169	10959294	-	21126	0.108201	0.135269	0.0906094	0.0468767	Similar to Cfap44: Cilia- and flagella-associated protein 44 (Mus musculus OX%3D10090)
ANN01012	Chr1	10966372	10985589	-	19218	0.0262465	0.0186845	0.0611273	0.0650979	Similar to Cfap44: Cilia- and flagella-associated protein 44 (Mus musculus OX%3D10090)
ANN01013	Chr1	10987713	10989836	+	2124	0.0829311	0.0645256	0	0.0314007	Similar to F52C9.6: Putative uncharacterized transposon-derived protein F52C9.6 (Caenorhabditis elegans OX%3D6239)
ANN01014	Chr1	10998568	11017132	-	18565	0.00820154	0.0139457	0.0332724	0.0506341	Similar to CFAP44: Cilia- and flagella-associated protein 44 (Homo sapiens OX%3D9606)
ANN01015	Chr1	11017851	11021297	+	3447	0	0	0.03293	0	Similar to RTase: Probable RNA-directed DNA polymerase from transposon BS (Drosophila melanogaster OX%3D7227)
ANN01016	Chr1	11022096	11023558	-	1463	0	0	0	0	Similar to Cfap44: Cilia- and flagella-associated protein 44 (Mus musculus OX%3D10090)
ANN01017	Chr1	11029706	11038247	+	8542	3.18135	7.12405	5.18613	7.21946	Similar to Tf2-8: Transposon Tf2-8 polyprotein (Schizosaccharomyces pombe (strain 972 / ATCC 24843) OX%3D284812)
ANN01018	Chr1	11061937	11084970	-	23034	0.34312	0.23036	0.460806	0.239231	Similar to Rnf123: E3 ubiquitin-protein ligase RNF123 (Mus musculus OX%3D10090)
ANN01019	Chr1	11087118	11088526	+	1409	0.283038	1.16751	0.138141	0.777951	Protein of unknown function
ANN01020	Chr1	11091181	11094938	-	3758	0.729766	0.366388	0.753378	0.393658	Similar to RNF123: E3 ubiquitin-protein ligase RNF123 (Homo sapiens OX%3D9606)
ANN01021	Chr1	11096063	11100314	+	4252	0.0964949	0	0.0514798	0	Similar to X-element\ORF2: Probable RNA-directed DNA polymerase from transposon X-element (Drosophila melanogaster OX%3D7227)
ANN01022	Chr1	11102334	11103054	-	721	2.62007	1.33688	2.16895	1.63866	Protein of unknown function
ANN01023	Chr1	11105496	11112600	+	7105	1.78586	1.42257	1.79504	0.773023	Similar to rbm42: RNA-binding protein 42 (Danio rerio OX%3D7955)
ANN01024	Chr1	11159260	11161993	+	2734	0.199396	0	0.272836	0	Similar to pif1: ATP-dependent DNA helicase pif1 (Psychrobacter sp. (strain PRwf-1) OX%3D349106)
ANN01025	Chr1	11175099	11176714	+	1616	0.90705	0.192441	0.301087	0.282642	Protein of unknown function
ANN01026	Chr1	11176757	11177380	+	624	0.150424	0	0.175239	0	Protein of unknown function
ANN01027	Chr1	11195830	11197699	+	1870	0.100283	0	0.0520337	0.0864471	Protein of unknown function
ANN01028	Chr1	11204539	11206835	+	2297	0.398133	0.612056	0.416545	0.381862	Protein of unknown function
ANN01029	Chr1	11206967	11208884	+	1918	0.446242	0	0.217607	0.06955	Similar to S-antigen protein (Plasmodium falciparum (isolate FC27 / Papua New Guinea) OX%3D5837)
ANN01030	Chr1	11209786	11210443	+	658	2.53345	0.946095	1.20746	0	Protein of unknown function
ANN01031	Chr1	11210515	11211932	+	1418	0.918129	0.0522398	0.154092	0	Similar to K02A2.6: Uncharacterized protein K02A2.6 (Caenorhabditis elegans OX%3D6239)
ANN01032	Chr1	11226238	11226683	+	446	0	0	0.346044	0	Protein of unknown function
ANN01033	Chr1	11226790	11228312	+	1523	0.0692485	0	0.0692273	0.0438	Protein of unknown function
ANN01034	Chr1	11246526	11247303	+	778	0	0	0	0	Protein of unknown function
ANN01035	Chr1	11249154	11250674	+	1521	0.708937	0.287316	0.180978	0	Similar to F52C9.6: Putative uncharacterized transposon-derived protein F52C9.6 (Caenorhabditis elegans OX%3D6239)
ANN01036	Chr1	11254717	11258905	+	4189	0.0280265	0.17498	0.0464427	0.0385792	Protein of unknown function
ANN01037	Chr1	11267334	11271790	+	4457	0.136739	0.0829732	0.178239	0.288413	Similar to PGBD2: PiggyBac transposable element-derived protein 2 (Homo sapiens OX%3D9606)
ANN01038	Chr1	11272387	11273764	+	1378	0.344648	0	0.32651	0	Protein of unknown function
ANN01039	Chr1	11278593	11283853	+	5261	0.294186	0.252668	0.425725	0	Protein of unknown function
ANN01040	Chr1	11286583	11289119	+	2537	0.475739	0.131274	0.372035	0.0318552	Protein of unknown function
ANN01041	Chr1	11295965	11298322	+	2358	1.37969	0.915536	1.73234	2.18217	Similar to Prdm15: PR domain zinc finger protein 15 (Mus musculus OX%3D10090)
ANN01042	Chr1	11317543	11318320	+	778	0	0	0.146045	0	Protein of unknown function
ANN01043	Chr1	11319537	11320815	+	1279	0	0	0	0	Similar to RTase: Probable RNA-directed DNA polymerase from transposon BS (Drosophila melanogaster OX%3D7227)
ANN01044	Chr1	11345398	11349353	+	3956	0.348208	0.332144	0.737931	0.0505666	Protein of unknown function
ANN01045	Chr1	11351978	11352312	-	335	66.2018	56.826	90.1829	45.2023	Protein of unknown function
ANN01046	Chr1	11352386	11359848	-	7463	7.57404	4.44883	9.84462	3.41797	Similar to Tret1: Facilitated trehalose transporter Tret1 (Polypedilum vanderplanki OX%3D319348)
ANN01047	Chr1	11382987	11405604	-	22618	3.78762	0.29306	3.81835	0.191563	Similar to CG5065: Putative fatty acyl-CoA reductase CG5065 (Drosophila melanogaster OX%3D7227)
ANN01048	Chr1	11409970	11411194	+	1225	10.6111	4.17552	9.88715	3.11918	Similar to Togaram1: TOG array regulator of axonemal microtubules protein 1 (Mus musculus OX%3D10090)
ANN01049	Chr1	11418373	11421908	+	3536	2.26192	1.19863	1.98798	0.848179	Protein of unknown function
ANN01050	Chr1	11423818	11435263	-	11446	2.48411	2.9101	2.41189	2.52127	Similar to Tbp: TATA-box-binding protein (Spodoptera frugiperda OX%3D7108)
ANN01051	Chr1	11518307	11530846	+	12540	1.47126	3.79796	0.970889	3.90701	Similar to doxa-1: Dual oxidase maturation factor 1 (Caenorhabditis elegans OX%3D6239)
ANN01052	Chr1	11555718	11568583	-	12866	0.857252	0.545744	0.820457	0.335443	Similar to frtz: WD repeat-containing and planar cell polarity effector protein fritz (Drosophila melanogaster OX%3D7227)
ANN01053	Chr1	11672438	11677807	+	5370	0.0437233	0.0551491	0.0776966	0	Protein of unknown function
ANN01054	Chr1	11817223	11849717	+	32495	0.478588	1.3467	0.50317	1.02858	Similar to ds: Protein dachsous (Drosophila melanogaster OX%3D7227)
ANN01055	Chr1	11854624	11857446	+	2823	12.9461	18.7187	14.0809	15.1306	Similar to CNIH4: Protein cornichon homolog 4 (Bos taurus OX%3D9913)
ANN01056	Chr1	11861918	11867407	+	5490	0.0458751	0.144977	0.0582805	0.157566	Similar to Rsph1: Radial spoke head 1 homolog (Mus musculus OX%3D10090)
ANN01057	Chr1	11874103	11877535	+	3433	0.0853219	0.0366923	0.11682	0.0518457	Similar to pol: Retrovirus-related Pol polyprotein from transposon 297 (Drosophila melanogaster OX%3D7227)
ANN01058	Chr1	11922342	11928722	+	6381	0.605117	0.306842	0.553761	0.292723	Similar to RNF123: E3 ubiquitin-protein ligase RNF123 (Homo sapiens OX%3D9606)
ANN01059	Chr1	11937261	11939570	-	2310	0.0939499	0	0.0210591	0.210893	Protein of unknown function
ANN01060	Chr1	11938603	11942691	+	4089	0.174789	0.278069	0.29109	0	Protein of unknown function
ANN01061	Chr1	11949770	11950037	+	268	1.68884	0.70746	3.36579	1.82379	Similar to RNF123: E3 ubiquitin-protein ligase RNF123 (Homo sapiens OX%3D9606)
ANN01062	Chr1	11950878	11954447	+	3570	0.0410234	0.0207408	0.0476927	0.0997112	Protein of unknown function
ANN01063	Chr1	11959841	11967439	+	7599	0.439466	0.471356	0.382759	0.0834958	Similar to Rnf123: E3 ubiquitin-protein ligase RNF123 (Mus musculus OX%3D10090)
ANN01064	Chr1	11977393	11979547	-	2155	0.0489304	3.22219	0.0506844	2.62358	Protein of unknown function
ANN01065	Chr1	11988987	11994118	-	5132	6.39485	8.83466	6.66239	6.24616	Similar to mRpL35: 39S ribosomal protein L35%2C mitochondrial (Drosophila melanogaster OX%3D7227)
ANN01066	Chr1	12002557	12024446	+	21890	0.0471169	0.131526	0.136369	0.18404	Similar to CFAP44: Cilia- and flagella-associated protein 44 (Homo sapiens OX%3D9606)
ANN01067	Chr1	12032189	12044471	+	12283	0.00906902	0.012054	0.030666	0	Similar to Cfap44: Cilia- and flagella-associated protein 44 (Mus musculus OX%3D10090)
ANN01068	Chr1	12050339	12051435	+	1097	0.470706	0	0.34864	0.147418	Protein of unknown function
ANN01069	Chr1	12072364	12080477	-	8114	0.04772	0.0364964	0.0414308	0.0164338	Similar to X-element\ORF2: Probable RNA-directed DNA polymerase from transposon X-element (Drosophila melanogaster OX%3D7227)
ANN01070	Chr1	12111235	12111819	-	585	0.742404	0.507013	0	0.2283	Similar to GVQW3: Protein GVQW3 (Homo sapiens OX%3D9606)
ANN01071	Chr1	12122697	12132967	-	10271	0.229972	2.1889	0.474405	1.97621	Protein of unknown function
ANN01072	Chr1	12156899	12178234	+	21336	7.80402	2.66368	7.65773	2.42484	Similar to MDH1: Malate dehydrogenase%2C cytoplasmic (Homo sapiens OX%3D9606)
ANN01073	Chr1	12188992	12191935	-	2944	0.501463	0.050305	0.551934	0.591789	Similar to RTase: Probable RNA-directed DNA polymerase from transposon BS (Drosophila melanogaster OX%3D7227)
ANN01074	Chr1	12201851	12222407	-	20557	0.00968625	0.0846584	0.0263939	0.109297	Protein of unknown function
ANN01075	Chr1	12299544	12303314	-	3771	0.251929	2.49962	0.0837133	1.50161	Protein of unknown function
ANN01077	Chr1	12508115	12510537	+	2423	10.2825	2.67751	9.8914	3.42369	Protein of unknown function
ANN01078	Chr1	12510950	12512490	+	1541	2.78946	0.617647	2.81033	0.985481	Similar to DDB2: DNA damage-binding protein 2 (Gallus gallus OX%3D9031)
ANN01079	Chr1	12517133	12517808	-	676	184.356	125.273	184.851	104.528	Protein of unknown function
ANN01080	Chr1	12520430	12523745	-	3316	0	0.0189937	0.0658667	0.104883	Similar to pol: Retrovirus-related Pol polyprotein from transposon 17.6 (Drosophila melanogaster OX%3D7227)
ANN01081	Chr1	12523996	12529779	-	5784	0	0.0524717	0.0364392	0.0716497	Similar to pol: Retrovirus-related Pol polyprotein from transposon 17.6 (Drosophila melanogaster OX%3D7227)
ANN01082	Chr1	12539501	12554995	-	15495	3.2557	1.6732	4.57232	2.02527	Similar to Usp5: Ubiquitin carboxyl-terminal hydrolase 5 (Mus musculus OX%3D10090)
ANN01083	Chr1	12566463	12571682	-	5220	48.6836	26.9209	44.5685	17.6232	Similar to STIP1: Stress-induced-phosphoprotein 1 (Macaca fascicularis OX%3D9541)
ANN01084	Chr1	12591108	12595329	-	4222	0.2582	0.615427	0.403786	1.23221	Similar to pol: RNA-directed DNA polymerase from mobile element jockey (Drosophila melanogaster OX%3D7227)
ANN01085	Chr1	12601689	12603548	-	1860	0	0	0	0	Similar to X-element\ORF2: Probable RNA-directed DNA polymerase from transposon X-element (Drosophila melanogaster OX%3D7227)
ANN01086	Chr1	12639301	12651021	+	11721	0.405291	0.506511	0.327927	1.42128	Protein of unknown function
ANN01087	Chr1	12657679	12670588	-	12910	5.04043	3.79131	5.39956	4.20089	Similar to GT-4: Trihelix transcription factor GT-4 (Arabidopsis thaliana OX%3D3702)
ANN01088	Chr1	12686985	12689434	-	2450	3.42607	1.7667	3.80507	0.783124	Similar to Usp5: Ubiquitin carboxyl-terminal hydrolase 5 (Mus musculus OX%3D10090)
ANN01089	Chr1	12780742	12796465	-	15724	3.63701	3.38219	3.66153	2.2604	Similar to GT-4: Trihelix transcription factor GT-4 (Arabidopsis thaliana OX%3D3702)
ANN01090	Chr1	12809397	12811932	-	2536	2323.2	554.948	1931.06	608.44	Similar to rpl27: 60S ribosomal protein L27 (Danio rerio OX%3D7955)
ANN01091	Chr1	12817953	12824941	+	6989	0.122416	0.209735	0.237629	0.113905	Protein of unknown function
ANN01092	Chr1	12829104	12838637	-	9534	0.885123	2.16425	1.14749	2.49967	Similar to pol: Retrovirus-related Pol polyprotein from transposon 17.6 (Drosophila melanogaster OX%3D7227)
ANN01093	Chr1	12839848	12840335	-	488	3.02028	16.1485	5.77106	9.30498	Similar to IP6K3: Inositol hexakisphosphate kinase 3 (Homo sapiens OX%3D9606)
ANN01094	Chr1	12887645	12891648	+	4004	0.500892	0.532562	0.627177	0.655166	Similar to LRTOMT: Leucine-rich repeat-containing protein 51 (Pan troglodytes OX%3D9598)
ANN01095	Chr1	12897533	12901034	-	3502	10.8539	4.54606	12.6779	3.58161	Similar to Sf3b4: Splicing factor 3B subunit 4 (Rattus norvegicus OX%3D10116)
ANN01096	Chr1	12902072	12904870	-	2799	1.66437	1.68774	2.53841	2.02637	Similar to Tret1: Facilitated trehalose transporter Tret1 (Polypedilum vanderplanki OX%3D319348)
ANN01097	Chr1	12907652	12916775	+	9124	11.3226	3.71109	9.55633	3.52437	Similar to SFMBT2: Scm-like with four MBT domains protein 2 (Homo sapiens OX%3D9606)
ANN01098	Chr1	12929367	12931332	-	1966	0.11337	0.0320427	0.0494916	0.254999	Similar to RTase: Probable RNA-directed DNA polymerase from transposon BS (Drosophila melanogaster OX%3D7227)
ANN01099	Chr1	12973928	12984555	+	10628	0.30377	0.31964	0.286022	0.196046	Similar to Nrg: Neuroglian (Drosophila melanogaster OX%3D7227)
ANN01100	Chr1	12987869	13019908	+	32040	0.609091	1.02026	1.03904	1.26919	Similar to Nrg: Neuroglian (Drosophila melanogaster OX%3D7227)
ANN01101	Chr1	13020209	13025648	+	5440	0.777767	1.19481	1.25408	1.70975	Similar to Nrg: Neuroglian (Drosophila melanogaster OX%3D7227)
ANN01102	Chr1	13031161	13039944	+	8784	0.909899	1.78266	1.41192	2.2912	Similar to Nrg: Neuroglian (Drosophila melanogaster OX%3D7227)
ANN01103	Chr1	13051737	13055247	+	3511	0.0300274	0.514409	0.0755883	0.618193	Similar to pol: Retrovirus-related Pol polyprotein from transposon 17.6 (Drosophila melanogaster OX%3D7227)
ANN01104	Chr1	13059796	13067441	+	7646	1.8507	1.44745	2.54998	1.35156	Similar to Ralgapb: Ral GTPase-activating protein subunit beta (Mus musculus OX%3D10090)
ANN01105	Chr1	13069722	13070490	+	769	0.381282	0.19277	0.147756	1.12874	Protein of unknown function
ANN01106	Chr1	13070598	13074736	+	4139	0.934359	0.852921	1.3469	1.14362	Similar to tc1a: Transposable element Tc1 transposase (Caenorhabditis elegans OX%3D6239)
ANN01107	Chr1	13086663	13090422	-	3760	0.193235	0.210628	0.224679	0.0429821	Similar to pol: Retrovirus-related Pol polyprotein from transposon 17.6 (Drosophila melanogaster OX%3D7227)
ANN01108	Chr1	13092977	13106708	+	13732	0.682003	0.734278	0.762139	0.877579	Similar to RALGAPB: Ral GTPase-activating protein subunit beta (Homo sapiens OX%3D9606)
ANN01109	Chr1	13106896	13119760	+	12865	1.49933	1.37429	1.9079	1.44349	Similar to RALGAPB: Ral GTPase-activating protein subunit beta (Homo sapiens OX%3D9606)
ANN01110	Chr1	13120830	13124653	+	3824	0.711226	1.11139	1.4296	0.937449	Protein of unknown function
ANN01111	Chr1	13124918	13126002	+	1085	5.63949	5.78481	4.81151	7.53913	Protein of unknown function
ANN01112	Chr1	13130859	13138349	-	7491	78.4071	32.7011	76.735	37.4229	Similar to PSMD12: 26S proteasome non-ATPase regulatory subunit 12 (Pongo abelii OX%3D9601)
ANN01113	Chr1	13144015	13151244	+	7230	3.1377	5.26229	3.94095	6.84437	Similar to ELMO1: Engulfment and cell motility protein 1 (Homo sapiens OX%3D9606)
ANN01114	Chr1	13251444	13270663	-	19220	0.179037	3.7731	0.155486	3.97049	Similar to Cadm1: Cell adhesion molecule 1 (Rattus norvegicus OX%3D10116)
ANN01115	Chr1	13400994	13405274	-	4281	0	0	0.0265133	0	Similar to X-element\ORF2: Probable RNA-directed DNA polymerase from transposon X-element (Drosophila melanogaster OX%3D7227)
ANN01116	Chr1	13417448	13433938	+	16491	0.0789125	1.51274	0.0480373	2.75113	Protein of unknown function
ANN01117	Chr1	13437341	13443856	-	6516	0.0180161	0.0227241	0.0568206	0.147664	Similar to Prosbeta3: Proteasome subunit beta type-3 (Drosophila melanogaster OX%3D7227)
ANN01118	Chr1	13449829	13461294	-	11466	0.0837773	1.24601	0.0928545	1.15478	Similar to FST: Follistatin (Fragment) (Ovis aries OX%3D9940)
ANN01119	Chr1	13510965	13513066	-	2102	16.5266	5.70926	14.9727	3.95525	Similar to Aggf1: Angiogenic factor with G patch and FHA domains 1 (Mus musculus OX%3D10090)
ANN01120	Chr1	13514268	13517180	-	2913	4934.37	822.867	4994.22	1119.48	Similar to Heat shock 70 kDa protein cognate 4 (Manduca sexta OX%3D7130)
ANN01121	Chr1	13540171	13544829	+	4659	606.354	166.728	394.307	113.001	Similar to Heat shock 70 kDa protein cognate 4 (Manduca sexta OX%3D7130)
ANN01122	Chr1	13547358	13553793	-	6436	2.77479	2.60144	3.19166	3.83432	Similar to Pgant35A: Polypeptide N-acetylgalactosaminyltransferase 35A (Drosophila melanogaster OX%3D7227)
ANN01123	Chr1	13556748	13559646	+	2899	2.2631	4.06933	2.47546	3.3921	Similar to ACOX3: Peroxisomal acyl-coenzyme A oxidase 3 (Homo sapiens OX%3D9606)
ANN01124	Chr1	13560762	13563424	-	2663	0.211464	0.0473058	0.146132	0	Similar to X-element\ORF2: Probable RNA-directed DNA polymerase from transposon X-element (Drosophila melanogaster OX%3D7227)
ANN01125	Chr1	13563666	13564841	-	1176	0.0797569	0	0	0	Similar to ORF1: Nucleic-acid-binding protein from transposon X-element (Drosophila melanogaster OX%3D7227)
ANN01126	Chr1	13565025	13582979	+	17955	0.54518	0.518032	0.646525	1.25175	Similar to ACOX3: Peroxisomal acyl-coenzyme A oxidase 3 (Homo sapiens OX%3D9606)
ANN01127	Chr1	13587156	13591836	-	4681	0.334417	0.209472	0.435242	0.315167	Similar to ELOVL4: Elongation of very long chain fatty acids protein 4 (Macaca mulatta OX%3D9544)
ANN01128	Chr1	13598186	13603549	+	5364	0.496278	0.171113	0.341853	0.0647845	Similar to tbc1d31: TBC1 domain family member 31 (Xenopus laevis OX%3D8355)
ANN01129	Chr1	13605426	13613692	+	8267	0.396984	0.0510553	0.317111	0.0339676	Similar to tbc1d31: TBC1 domain family member 31 (Xenopus tropicalis OX%3D8364)
ANN01130	Chr1	13613784	13615281	+	1498	0.0704049	0	0.185196	0.0594304	Protein of unknown function
ANN01131	Chr1	13661199	13664361	+	3163	0.303913	0.291495	0.139468	0.205808	Protein of unknown function
ANN01132	Chr1	13666475	13683762	-	17288	2.87073	2.99784	0.756262	1.13921	Similar to UGT2B18: UDP-glucuronosyltransferase 2B18 (Macaca fascicularis OX%3D9541)
ANN01133	Chr1	13701954	13706512	+	4559	623.43	153.59	584.914	148.977	Similar to Heat shock 70 kDa protein cognate 4 (Manduca sexta OX%3D7130)
ANN01134	Chr1	13709007	13714474	-	5468	3.26453	4.24845	1.8143	1.55221	Similar to Pgant35A: Polypeptide N-acetylgalactosaminyltransferase 35A (Drosophila melanogaster OX%3D7227)
ANN01135	Chr1	13728717	13750602	+	21886	0.948874	1.07062	0.706577	0.473851	Similar to ACOX3: Peroxisomal acyl-coenzyme A oxidase 3 (Homo sapiens OX%3D9606)
ANN01136	Chr1	13756341	13760453	-	4113	0	0.115255	0.0132751	0.0412821	Similar to ELOVL4: Elongation of very long chain fatty acids protein 4 (Homo sapiens OX%3D9606)
ANN01137	Chr1	13766799	13787975	+	21177	0.200081	0.0894918	0.226591	0.101203	Similar to tbc1d31: TBC1 domain family member 31 (Xenopus tropicalis OX%3D8364)
ANN01138	Chr1	13851349	13854350	+	3002	0	0	0.129625	0	Similar to ZBED9: SCAN domain-containing protein 3 (Homo sapiens OX%3D9606)
ANN01139	Chr1	13874491	13890327	+	15837	3.10585	2.99335	3.44512	2.55179	Similar to ABCG4: ATP-binding cassette sub-family G member 4 (Homo sapiens OX%3D9606)
ANN01140	Chr1	13892530	13899438	-	6909	26.5849	6.32807	29.5369	6.00329	Similar to cpped1: Serine/threonine-protein phosphatase CPPED1 (Xenopus tropicalis OX%3D8364)
ANN01141	Chr1	14094409	14095610	+	1202	0.37059	0.258778	0.532726	0.314676	Protein of unknown function
ANN01142	Chr1	14097134	14107373	+	10240	0.279197	0.685735	0.520307	0.351088	Similar to PLA1A: Phospholipase A1 member A (Bos taurus OX%3D9913)
ANN01143	Chr1	14111902	14129431	+	17530	0.0153903	0.0295383	0.0154759	0.0773164	Protein of unknown function
ANN01144	Chr1	14129571	14134854	+	5284	0.0177388	0.313179	0	0	Protein of unknown function
ANN01145	Chr1	14189114	14189396	-	283	0	0	0	0.630974	Protein of unknown function
ANN01146	Chr1	14189476	14196219	-	6744	0.013898	0.10152	0.0323815	0.0479222	Protein of unknown function
ANN01147	Chr1	14226093	14236500	+	10408	0	0.647685	0.0163558	0.925683	Protein of unknown function
ANN01148	Chr1	14265658	14281164	+	15507	0.275066	0.146534	0.323882	0.164454	Similar to TLK2: Serine/threonine-protein kinase tousled-like 2 (Homo sapiens OX%3D9606)
ANN01149	Chr1	14329599	14346076	+	16478	0.0690536	0.477785	0.0508658	0.175834	Protein of unknown function
ANN01150	Chr1	14346209	14367283	+	21075	0.0347668	0.186452	0.052179	0.249697	Protein of unknown function
ANN01151	Chr1	14431860	14448451	+	16592	0.395852	0.975957	1.13778	2.02386	Similar to TY3B-G: Transposon Ty3-G Gag-Pol polyprotein (Saccharomyces cerevisiae (strain ATCC 204508 / S288c) OX%3D559292)
ANN01152	Chr1	14479105	14481328	-	2224	0	0	0	0	Similar to X-element\ORF2: Probable RNA-directed DNA polymerase from transposon X-element (Drosophila melanogaster OX%3D7227)
ANN01153	Chr1	14601991	14610006	+	8016	0.048227	0.166193	0.0207003	0.125532	Similar to br: Broad-complex core protein isoforms 1/2/3/4/5 (Drosophila melanogaster OX%3D7227)
ANN01154	Chr1	14644775	14648533	-	3759	0.205715	0.0737883	0.0258784	0.0473482	Protein of unknown function
ANN01155	Chr1	14696802	14715409	+	18608	0.0519426	0.259748	0.146213	0.242275	Similar to br: Broad-complex core protein isoforms 1/2/3/4/5 (Drosophila melanogaster OX%3D7227)
ANN01156	Chr1	14727346	14730792	-	3447	0.0305851	0.0365432	0	0.0468862	Protein of unknown function
ANN01157	Chr1	14740050	14750992	+	10943	0.080888	0.574994	0.0755113	0.588604	Similar to tea1: Tip elongation aberrant protein 1 (Schizosaccharomyces pombe (strain 972 / ATCC 24843) OX%3D284812)
ANN01158	Chr1	14798724	14806899	+	8176	0.373495	0.563127	0.34463	0.620345	Similar to TMEM62: Transmembrane protein 62 (Homo sapiens OX%3D9606)
ANN01159	Chr1	14812234	14826931	-	14698	4.56758	0.0840651	5.63741	0.0552554	Protein of unknown function
ANN01160	Chr1	14831179	14832625	-	1447	29.0839	0.214932	39.4476	0.215257	Protein of unknown function
ANN01161	Chr1	14832779	14842223	-	9445	6.90507	0.0211724	9.91042	0.0530574	Protein of unknown function
ANN01162	Chr1	14902396	14911133	+	8738	0.0214523	0.606557	0.031239	0.634303	Similar to Actin-fragmin kinase (Physarum polycephalum OX%3D5791)
ANN01163	Chr1	14912621	14931754	-	19134	5.04178	7.27317	6.20528	8.41021	Similar to Ndg: Nidogen (Drosophila melanogaster OX%3D7227)
ANN01164	Chr1	14951685	14967503	+	15819	0.493429	1.2759	0.357163	0.821826	Similar to TMEM62: Transmembrane protein 62 (Homo sapiens OX%3D9606)
ANN01165	Chr1	14994116	15004014	-	9899	5.23991	0.106147	9.40285	0.0898342	Protein of unknown function
ANN01166	Chr1	15084475	15099417	+	14943	0.903533	0.549958	0.974519	0.801624	Similar to PIGA: Phosphatidylinositol N-acetylglucosaminyltransferase subunit A (Homo sapiens OX%3D9606)
ANN01167	Chr1	15108975	15119228	-	10254	0.839435	1.99729	1.14319	1.21858	Similar to Cacna2d3: Voltage-dependent calcium channel subunit alpha-2/delta-3 (Rattus norvegicus OX%3D10116)
ANN01168	Chr1	15120086	15120748	-	663	0.088652	0	0.164916	0	Protein of unknown function
ANN01169	Chr1	15121720	15125941	-	4222	0.33588	0.572885	0.229784	0.399289	Similar to X-element\ORF2: Probable RNA-directed DNA polymerase from transposon X-element (Drosophila melanogaster OX%3D7227)
ANN01170	Chr1	15128229	15129927	-	1699	0.0310354	0.117757	0.0334149	0	Protein of unknown function
ANN01171	Chr1	15131650	15142096	-	10447	0.185151	0.326328	0.158918	0.304823	Similar to Cacna2d4: Voltage-dependent calcium channel subunit alpha-2/delta-4 (Mus musculus OX%3D10090)
ANN01172	Chr1	15142540	15143242	-	703	0	0	0	0	Similar to Cacna2d3: Voltage-dependent calcium channel subunit alpha-2/delta-3 (Mus musculus OX%3D10090)
ANN01173	Chr1	15151252	15158517	-	7266	0.187193	0.310754	0.138793	0.101788	Similar to CACNA2D4: Voltage-dependent calcium channel subunit alpha-2/delta-4 (Homo sapiens OX%3D9606)
ANN01174	Chr1	15170342	15176015	+	5674	1.71592	1.37771	1.80305	1.86305	Similar to rost: Protein rolling stone (Drosophila melanogaster OX%3D7227)
ANN01175	Chr1	15185243	15189652	-	4410	0.0464848	0.0755074	0.0955899	0.261248	Protein of unknown function
ANN01176	Chr1	15190529	15192812	-	2284	0.0719371	0.781361	0.668147	0.663775	Similar to Cacna2d4: Voltage-dependent calcium channel subunit alpha-2/delta-4 (Mus musculus OX%3D10090)
ANN01177	Chr1	15193443	15194810	-	1368	0.231518	0.19233	0.0355709	0.244013	Similar to CACNA2D4: Voltage-dependent calcium channel subunit alpha-2/delta-4 (Homo sapiens OX%3D9606)
ANN01178	Chr1	15197436	15198452	-	1017	0	0.291432	0	0	Similar to Transposable element Tcb1 transposase (Caenorhabditis briggsae OX%3D6238)
ANN01179	Chr1	15199767	15202079	-	2313	0.0253839	0.0944464	0.43799	0.658231	Protein of unknown function
ANN01180	Chr1	15244883	15250760	-	5878	1.06529	1.45459	2.03265	2.32604	Similar to rost: Protein rolling stone (Drosophila melanogaster OX%3D7227)
ANN01181	Chr1	15277821	15302790	+	24970	0.287714	0.466816	0.360582	0.83155	Similar to Cacna2d4: Voltage-dependent calcium channel subunit alpha-2/delta-4 (Mus musculus OX%3D10090)
ANN01182	Chr1	15303993	15312570	+	8578	0.00684244	0.0288945	0.0372976	0.127708	Similar to RTase: Probable RNA-directed DNA polymerase from transposon BS (Drosophila melanogaster OX%3D7227)
ANN01183	Chr1	15313734	15315419	+	1686	1.59315	4.12082	1.73403	4.01608	Protein of unknown function
ANN01184	Chr1	15319918	15321722	-	1805	4.32049	2.68775	4.12886	3.68232	Similar to Piga: N-acetylglucosaminyl-phosphatidylinositol biosynthetic protein (Mus musculus OX%3D10090)
ANN01185	Chr1	15357412	15361576	+	4165	0.824983	0.0887917	1.52216	0.0427317	Similar to ifi30: Gamma-interferon-inducible lysosomal thiol reductase (Danio rerio OX%3D7955)
ANN01186	Chr1	15361729	15365205	+	3477	2.93679	3.70531	6.03864	7.03099	Similar to LINE-1 reverse transcriptase homolog (Nycticebus coucang OX%3D9470)
ANN01187	Chr1	15367387	15371325	+	3939	0.768168	0.132505	1.81619	0.310499	Similar to ifi30: Gamma-interferon-inducible lysosomal thiol reductase (Danio rerio OX%3D7955)
ANN01188	Chr1	15371643	15379898	-	8256	1.13097	0.691363	3.52725	0.816813	Similar to rp2: Protein XRP2 (Danio rerio OX%3D7955)
ANN01189	Chr1	15390354	15392588	-	2235	0	0	0.0488693	0	Protein of unknown function
ANN01190	Chr1	15397339	15403545	+	6207	3.82258	1.74073	7.68365	3.80484	Similar to Vps16: Vacuolar protein sorting-associated protein 16 homolog (Mus musculus OX%3D10090)
ANN01191	Chr1	15404592	15409936	-	5345	1.2065	0.297557	2.11157	0.160356	Similar to PCMT1: Protein-L-isoaspartate(D-aspartate) O-methyltransferase (Gallus gallus OX%3D9031)
ANN01192	Chr1	15418459	15437094	-	18636	1.75344	0.620347	1.73283	0.405629	Protein of unknown function
ANN01193	Chr1	15444760	15448569	+	3810	0.0893008	0.153523	0.328696	0.502016	Similar to CGGBP1: CGG triplet repeat-binding protein 1 (Homo sapiens OX%3D9606)
ANN01194	Chr1	15464590	15480365	+	15776	0.243009	0.329221	0.503029	0.356316	Similar to gudu: Armadillo repeat-containing protein gudu (Drosophila melanogaster OX%3D7227)
ANN01195	Chr1	15519661	15525119	+	5459	0.908089	0.123466	0.870578	0.0122139	Similar to PCMT1: Protein-L-isoaspartate(D-aspartate) O-methyltransferase (Gallus gallus OX%3D9031)
ANN01196	Chr1	15527569	15534327	-	6759	7.43307	3.08409	4.83616	0.809005	Similar to VPS16: Vacuolar protein sorting-associated protein 16 homolog (Homo sapiens OX%3D9606)
ANN01197	Chr1	15538394	15554492	+	16099	0.230748	0.239261	0.225169	0.047198	Similar to rp2: Protein XRP2 (Danio rerio OX%3D7955)
ANN01198	Chr1	15554890	15558752	-	3863	1.78321	0.0920114	5.92092	0.698026	Similar to IFI30: Gamma-interferon-inducible lysosomal thiol reductase (Bos taurus OX%3D9913)
ANN01199	Chr1	15564480	15566626	-	2147	0.420518	0	0.196391	0.0376444	Similar to GILT1: GILT-like protein 1 (Drosophila melanogaster OX%3D7227)
ANN01200	Chr1	15567640	15568244	-	605	0.271662	0	0.903759	0	Protein of unknown function
ANN01201	Chr1	15609001	15638105	+	29105	3.99504	1.90293	5.38311	1.81094	Similar to tps1: Alpha%2Calpha-trehalose-phosphate synthase [UDP-forming] (Schizosaccharomyces pombe (strain 972 / ATCC 24843) OX%3D284812)
ANN01202	Chr1	15647665	15657417	+	9753	6.80408	4.1389	8.71227	4.37452	Similar to TPP1: Probable trehalose-phosphate phosphatase 1 (Oryza sativa subsp. japonica OX%3D39947)
ANN01203	Chr1	15670631	15674020	-	3390	2.73831	3.4933	2.78115	2.46754	Similar to SIPA1L2: Signal-induced proliferation-associated 1-like protein 2 (Homo sapiens OX%3D9606)
ANN01204	Chr1	15766851	15769949	-	3099	0	0	0.0366291	0	Similar to jockey\pol: RNA-directed DNA polymerase from mobile element jockey (Drosophila funebris OX%3D7221)
ANN01205	Chr1	15827713	15828976	-	1264	40.8401	26.4427	49.8068	36.4979	Protein of unknown function
ANN01206	Chr1	15831741	15844395	-	12655	7.81639	5.96808	8.24051	6.05461	Similar to TBC1D23: TBC1 domain family member 23 (Gallus gallus OX%3D9031)
ANN01207	Chr1	15851260	15851464	-	205	283.516	97.7399	1478.99	235.907	Protein of unknown function
ANN01208	Chr1	15853538	15853742	+	205	274.369	141.253	1047.29	189.817	Protein of unknown function
ANN01209	Chr1	15861379	15861583	-	205	950.984	236.055	1759.67	287.591	Protein of unknown function
ANN01210	Chr1	15862359	15863967	+	1609	9.38763	4.41514	43.5827	8.09193	Protein of unknown function
ANN01211	Chr1	15871161	15871365	-	205	95.8117	25.306	549.525	30.8823	Protein of unknown function
ANN01212	Chr1	15872130	15873646	+	1517	90.5678	34.9976	241.103	36.8855	Protein of unknown function
ANN01213	Chr1	15880341	15880704	-	364	579.665	255.283	3380.26	547.655	Protein of unknown function
ANN01214	Chr1	15888076	15888280	+	205	3630.27	1680.57	22125.6	4681.46	Protein of unknown function
ANN01215	Chr1	15892140	15893008	-	869	4.26724	2.81784	5.06857	4.82703	Similar to mios: GATOR complex protein MIOS (Danio rerio OX%3D7955)
ANN01216	Chr1	15905621	15914518	-	8898	0.792864	0.76205	0.861223	0.884724	Similar to mios-a: GATOR complex protein MIOS-A (Xenopus laevis OX%3D8355)
ANN01217	Chr1	15918130	15922922	-	4793	1.13122	1.0953	1.4507	1.52061	Similar to mios-b: GATOR complex protein MIOS-B (Xenopus laevis OX%3D8355)
ANN01218	Chr1	15923047	15933670	-	10624	6.59963	5.39458	7.24911	6.49023	Similar to mios-b: GATOR complex protein MIOS-B (Xenopus laevis OX%3D8355)
ANN01219	Chr1	15939376	15954779	-	15404	2.17364	3.30588	2.38336	3.34149	Similar to HECW2: E3 ubiquitin-protein ligase HECW2 (Homo sapiens OX%3D9606)
ANN01220	Chr1	15979628	15990829	-	11202	1.32841	1.98811	1.45809	1.43061	Similar to Hecw1: E3 ubiquitin-protein ligase HECW1 (Mus musculus OX%3D10090)
ANN01221	Chr1	16043175	16054553	-	11379	0.244049	0.330156	0.64955	0.99686	Similar to X-element\ORF2: Probable RNA-directed DNA polymerase from transposon X-element (Drosophila melanogaster OX%3D7227)
ANN01222	Chr1	16095609	16106797	+	11189	0.997546	0.912842	1.16959	1.19724	Similar to ZNF480: Zinc finger protein 480 (Homo sapiens OX%3D9606)
ANN01223	Chr1	16108714	16116187	+	7474	7.58735	6.04706	7.51609	7.88129	Similar to Gastrula zinc finger protein XlCGF57.1 (Fragment) (Xenopus laevis OX%3D8355)
ANN01224	Chr1	16120143	16133779	+	13637	0.344553	0.20759	0.450365	0.155695	Similar to ift57: Intraflagellar transport protein 57 homolog (Xenopus laevis OX%3D8355)
ANN01225	Chr1	16204041	16208935	+	4895	0.150872	0.189851	0.0533331	0.0842065	Similar to ZNF480: Zinc finger protein 480 (Homo sapiens OX%3D9606)
ANN01226	Chr1	16210268	16213529	+	3262	0.756768	0.460732	0.60718	0.201381	Protein of unknown function
ANN01227	Chr1	16214266	16216937	+	2672	1.90905	3.05902	1.04399	1.70049	Protein of unknown function
ANN01228	Chr1	16233082	16267581	+	34500	1.38818	0.466483	2.76274	1.72845	Similar to FASN: Fatty acid synthase (Gallus gallus OX%3D9031)
ANN01229	Chr1	16270650	16298644	+	27995	4.09767	9.6632	4.03093	9.56832	Similar to FASN: Fatty acid synthase (Gallus gallus OX%3D9031)
ANN01230	Chr1	16294468	16309685	-	15218	0.108967	2.49275	0.0350889	2.244	Similar to EGFLAM: Pikachurin (Homo sapiens OX%3D9606)
ANN01231	Chr1	16373091	16380153	-	7063	0.972595	0.658387	0.664959	0.411661	Similar to Bbs7: Bardet-Biedl syndrome 7 protein homolog (Mus musculus OX%3D10090)
ANN01232	Chr1	16388825	16391327	-	2503	22.8461	10.9478	23.631	10.0379	Similar to Ino80e: INO80 complex subunit E (Rattus norvegicus OX%3D10116)
ANN01233	Chr1	16440497	16484276	-	43780	0.0757473	1.59542	0.126765	1.4969	Similar to tutl: Protein turtle (Drosophila melanogaster OX%3D7227)
ANN01234	Chr1	16487121	16490611	-	3491	0.0973301	0.830418	0.114879	0.730738	Similar to tutl: Protein turtle (Drosophila melanogaster OX%3D7227)
ANN01235	Chr1	16501413	16504644	-	3232	0.0816427	0.045821	0.203179	0.0500061	Protein of unknown function
ANN01236	Chr1	16507872	16514614	-	6743	0.0729658	1.33986	0.183222	1.2093	Similar to jockey\pol: RNA-directed DNA polymerase from mobile element jockey (Drosophila funebris OX%3D7221)
ANN01237	Chr1	16659202	16670309	-	11108	390.932	90.0626	349.424	112.562	Similar to RpL40: Ubiquitin-60S ribosomal protein L40 (Drosophila melanogaster OX%3D7227)
ANN01238	Chr1	16754182	16760025	-	5844	0.0280821	0.110167	0.0374535	0.682584	Protein of unknown function
ANN01239	Chr1	16766893	16772231	-	5339	0	0	0	0.0166668	Similar to X-element\ORF2: Probable RNA-directed DNA polymerase from transposon X-element (Drosophila melanogaster OX%3D7227)
ANN01240	Chr1	16920759	16922278	-	1520	199.431	4.79534	282.666	0.281912	Protein of unknown function
ANN01241	Chr1	16924254	16926252	-	1999	43.1995	1.3864	74.1551	0.222517	Protein of unknown function
ANN01242	Chr1	16929497	16932356	-	2860	28.4837	0.181104	39.9247	0.0565127	Protein of unknown function
ANN01243	Chr1	16971362	16975754	+	4393	0.0373935	0	0.0922654	0.0892638	Similar to Retrotransposable element SLACS 132 kDa protein (Trypanosoma brucei gambiense OX%3D31285)
ANN01244	Chr1	17019997	17020946	-	950	0	0	0.119575	0	Protein of unknown function
ANN01245	Chr1	17129976	17133528	+	3553	0.0296723	0	0	0.045487	Similar to jockey\pol: RNA-directed DNA polymerase from mobile element jockey (Drosophila funebris OX%3D7221)
ANN01246	Chr1	17136723	17140395	-	3673	0.0319649	0	0	0	Similar to pol: RNA-directed DNA polymerase from mobile element jockey (Drosophila melanogaster OX%3D7227)
ANN01247	Chr1	17140614	17141979	-	1366	0	0	0	0	Protein of unknown function
ANN01248	Chr1	17185895	17205450	+	19556	1.36879	6.67138	1.87237	7.31521	Similar to CNTN5: Contactin-5 (Homo sapiens OX%3D9606)
ANN01249	Chr1	17213088	17215029	-	1942	52.5016	93.5631	54.5719	92.6804	Similar to GPXMC1: Probable phospholipid hydroperoxide glutathione peroxidase (Mesembryanthemum crystallinum OX%3D3544)
ANN01250	Chr1	17216412	17217497	-	1086	0.858223	1.545	5.09712	4.59657	Similar to GVQW3: Protein GVQW3 (Homo sapiens OX%3D9606)
ANN01251	Chr1	17217693	17221190	-	3498	3.54144	4.04038	5.77564	4.67731	Similar to GVQW3: Protein GVQW3 (Homo sapiens OX%3D9606)
ANN01252	Chr1	17225183	17228893	-	3711	0.316125	0.206553	0.420334	0.486954	Similar to pol: RNA-directed DNA polymerase from mobile element jockey (Drosophila melanogaster OX%3D7227)
ANN01253	Chr1	17262834	17263596	+	763	77.9352	40.5629	71.0858	32.8037	Similar to MED22: Mediator of RNA polymerase II transcription subunit 22 (Aedes aegypti OX%3D7159)
ANN01254	Chr1	17265235	17270711	-	5477	16.1027	5.25989	15.8493	4.57883	Similar to Orc2: Origin recognition complex subunit 2 (Drosophila melanogaster OX%3D7227)
ANN01255	Chr1	17270924	17272301	+	1378	0	0	0	0	Similar to R1A1-element\ORF1: Uncharacterized 50 kDa protein in type I retrotransposable element R1DM (Drosophila melanogaster OX%3D7227)
ANN01256	Chr1	17272369	17275263	+	2895	0	0.107392	0.192491	0	Similar to Retrovirus-related Pol polyprotein from type-1 retrotransposable element R1 (Fragment) (Bradysia coprophila OX%3D38358)
ANN01257	Chr1	17287029	17297174	-	10146	4.05309	3.53443	3.92932	3.05382	Similar to SLC35F5: Solute carrier family 35 member F5 (Bos taurus OX%3D9913)
ANN01258	Chr1	17340221	17342056	+	1836	22.2113	25.1358	21.9867	22.0121	Similar to MED9: Mediator of RNA polymerase II transcription subunit 9 (Drosophila melanogaster OX%3D7227)
ANN01259	Chr1	17349460	17351803	+	2344	10.1844	10.3962	8.72562	10.1541	Similar to med9: Mediator of RNA polymerase II transcription subunit 9 (Xenopus laevis OX%3D8355)
ANN01260	Chr1	17351900	17352797	+	898	61.0774	44.174	46.6945	37.9052	Similar to RNF113A: E3 ubiquitin-protein ligase RNF113A (Homo sapiens OX%3D9606)
ANN01261	Chr1	17356954	17377312	-	20359	2.47959	2.40642	2.14255	1.7325	Similar to SLC19A3: Thiamine transporter 2 (Macaca fascicularis OX%3D9541)
ANN01262	Chr1	17416426	17428185	-	11760	1.37393	2.79501	1.28896	3.4712	Protein of unknown function
ANN01263	Chr1	17498789	17500481	-	1693	0	0	0	0	Similar to RTase: Probable RNA-directed DNA polymerase from transposon BS (Drosophila melanogaster OX%3D7227)
ANN01264	Chr1	17547039	17550763	+	3725	0.025165	0.039755	0	0.134553	Protein of unknown function
ANN01265	Chr1	17579647	17585359	-	5713	0	0.0777561	0.0170257	0.0233416	Similar to pol: Retrovirus-related Pol polyprotein from transposon 17.6 (Drosophila melanogaster OX%3D7227)
ANN01266	Chr1	17633105	17651845	+	18741	0.726318	20.0962	1.39103	15.8465	Similar to D11DS: Acyl-CoA Delta(11) desaturase (Trichoplusia ni OX%3D7111)
ANN01267	Chr1	17658032	17664722	+	6691	87.8291	80.3062	142.096	83.3251	Similar to B1: Esterase B1 (Culex pipiens OX%3D7175)
ANN01268	Chr1	17708344	17717505	-	9162	0.0204594	0.419265	0.106531	0.0321905	Similar to RTase: Probable RNA-directed DNA polymerase from transposon BS (Drosophila melanogaster OX%3D7227)
ANN01269	Chr1	17713216	17715022	+	1807	0	0	0	0	Protein of unknown function
ANN01270	Chr1	17720119	17721850	+	1732	0.0541388	0.106796	0	0	Protein of unknown function
ANN01271	Chr1	17853830	17871426	+	17597	0.0865684	0.8514	0.0455702	0.806184	Similar to CG14535: Kinesin-like protein CG14535 (Drosophila melanogaster OX%3D7227)
ANN01272	Chr1	17896822	17909297	+	12476	13.2913	19.536	12.9588	18.6807	Similar to Slit3: Slit homolog 3 protein (Mus musculus OX%3D10090)
ANN01273	Chr1	17969699	17971598	+	1900	0.11731	1.20661	0.548042	0	Similar to R1A1-element\ORF1: Uncharacterized 50 kDa protein in type I retrotransposable element R1DM (Drosophila melanogaster OX%3D7227)
ANN01274	Chr1	17971663	17974537	+	2875	0.183407	1.13296	0.341818	0.333174	Similar to R1A1-element\ORF2: Putative 115 kDa protein in type-1 retrotransposable element R1DM (Drosophila melanogaster OX%3D7227)
ANN01275	Chr1	17986033	17990455	+	4423	0.906547	0.545614	0.705572	0.775843	Protein of unknown function
ANN01276	Chr1	17990499	18006827	+	16329	0.537217	0.72365	0.660186	0.453802	Protein of unknown function
ANN01277	Chr1	18176193	18192307	+	16115	9.27204	7.64425	9.64325	6.83253	Similar to clptm1: Cleft lip and palate transmembrane protein 1 homolog (Danio rerio OX%3D7955)
ANN01278	Chr1	18204901	18205514	+	614	21.7887	8.16756	22.1568	8.87041	Protein of unknown function
ANN01279	Chr1	18223431	18234864	+	11434	4.83281	1.69209	3.997	0.567119	Similar to 6-phosphofructo-2-kinase/fructose-2%2C6-bisphosphatase (Lithobates catesbeianus OX%3D8400)
ANN01280	Chr1	18274770	18275416	-	647	1.99439	0.229176	1.30329	0.250108	Similar to ybx2-a: Y-box-binding protein 2-A (Xenopus laevis OX%3D8355)
ANN01281	Chr1	18278032	18279247	-	1216	791.056	2103.39	748.815	1908.65	Similar to Atp5f1d: ATP synthase subunit delta%2C mitochondrial (Mus musculus OX%3D10090)
ANN01282	Chr1	18281009	18300574	+	19566	2.02368	1.09129	2.8202	0.80646	Similar to Ece1: Endothelin-converting enzyme 1 (Mus musculus OX%3D10090)
ANN01283	Chr1	18304815	18306224	-	1410	13.6546	8.75729	13.8301	2.73053	Similar to Tret1: Facilitated trehalose transporter Tret1 (Bombyx mori OX%3D7091)
ANN01284	Chr1	18314177	18335287	-	21111	50.7063	62.5085	58.0653	46.4275	Similar to mlt-7: Peroxidase mlt-7 (Caenorhabditis elegans OX%3D6239)
ANN01285	Chr1	18354486	18367840	-	13355	2.24744	0.889856	2.59914	1.49188	Similar to 6-phosphofructo-2-kinase/fructose-2%2C6-bisphosphatase (Lithobates catesbeianus OX%3D8400)
ANN01286	Chr1	18369597	18373629	+	4033	0.447718	0.477202	1.05732	2.42251	Similar to Transposon TX1 uncharacterized 149 kDa protein (Xenopus laevis OX%3D8355)
ANN01287	Chr1	18403591	18418131	-	14541	2.74999	11.1448	3.32132	10.4501	Similar to Phm: Peptidylglycine alpha-hydroxylating monooxygenase (Drosophila melanogaster OX%3D7227)
ANN01288	Chr1	18442408	18449738	+	7331	0.287752	0.242317	0.539301	0.190782	Similar to WBP4: WW domain-binding protein 4 (Homo sapiens OX%3D9606)
ANN01289	Chr1	18482496	18490600	+	8105	0.192345	0.105965	4.45494	0.508529	Similar to X-element\ORF2: Probable RNA-directed DNA polymerase from transposon X-element (Drosophila melanogaster OX%3D7227)
ANN01290	Chr1	18505786	18510652	-	4867	113.762	26.5183	122.148	30.2206	Similar to EF2: Elongation factor 2 (Drosophila melanogaster OX%3D7227)
ANN01291	Chr1	18515994	18525754	-	9761	0.0378262	0.0204869	0.0389806	0.0136606	Similar to CFAP45: Cilia- and flagella-associated protein 45 (Homo sapiens OX%3D9606)
ANN01292	Chr1	18532865	18537852	-	4988	5.14143	4.62761	5.16884	4.6335	Protein of unknown function
ANN01293	Chr1	18540708	18543611	+	2904	0.198035	0.604089	0.145179	0.417609	Protein of unknown function
ANN01294	Chr1	18546904	18550452	+	3549	15.8179	3.83782	11.4997	1.678	Similar to PRMT6.1: Probable protein arginine N-methyltransferase 6.1 (Oryza sativa subsp. indica OX%3D39946)
ANN01295	Chr1	18551406	18557100	-	5695	10.194	7.33193	9.67482	5.77699	Similar to ooc-5: Torsin-like protein (Caenorhabditis elegans OX%3D6239)
ANN01296	Chr1	18583102	18584802	+	1701	0	0.0870869	0	0.104667	Similar to RTase: Probable RNA-directed DNA polymerase from transposon BS (Drosophila melanogaster OX%3D7227)
ANN01297	Chr1	18584879	18586884	+	2006	1.22776	1.12418	2.06028	0.612809	Protein of unknown function
ANN01298	Chr1	18586992	18589778	+	2787	0	0	0.180359	0.398861	Similar to PGBD3: PiggyBac transposable element-derived protein 3 (Homo sapiens OX%3D9606)
ANN01299	Chr1	18590555	18592075	+	1521	9.53056	8.79981	7.08778	6.35898	Protein of unknown function
ANN01300	Chr1	18610531	18611410	-	880	0.166567	0.168427	0	0	Similar to Tnpo1: Transportin-1 (Mus musculus OX%3D10090)
ANN01301	Chr1	18613977	18629971	-	15995	0.565923	0.759378	0.633628	0.788029	Similar to Tnpo1: Transportin-1 (Mus musculus OX%3D10090)
ANN01302	Chr1	18683635	18701461	-	17827	0.142964	0.242708	0.143021	0.0513533	Similar to CFAP45: Cilia- and flagella-associated protein 45 (Homo sapiens OX%3D9606)
ANN01303	Chr1	18722641	18728314	+	5674	35.2007	6.01889	28.158	5.88064	Similar to PRMT6.1: Probable protein arginine N-methyltransferase 6.1 (Oryza sativa subsp. indica OX%3D39946)
ANN01304	Chr1	18729268	18733554	-	4287	32.1232	17.5272	27.5932	17.7546	Similar to TOR1B: Torsin-1B (Homo sapiens OX%3D9606)
ANN01305	Chr1	18740714	18742721	+	2008	8.66418	8.52722	11.0924	10.4326	Protein of unknown function
ANN01306	Chr1	18744965	18746723	+	1759	0.11326	0.155845	0.566755	1.58163	Similar to K02A2.6: Uncharacterized protein K02A2.6 (Caenorhabditis elegans OX%3D6239)
ANN01307	Chr1	18750723	18759272	+	8550	3.85815	4.50863	4.51972	5.7517	Similar to ORF1: Nucleic-acid-binding protein from transposon X-element (Drosophila melanogaster OX%3D7227)
ANN01308	Chr1	18803749	18810796	-	7048	14.7477	16.0664	15.9041	14.307	Similar to Dock7: Dedicator of cytokinesis protein 7 (Mus musculus OX%3D10090)
ANN01309	Chr1	18833194	18856525	-	23332	1.4914	0.821199	1.46913	0.666028	Similar to melt: Protein melted (Drosophila melanogaster OX%3D7227)
ANN01310	Chr1	18869658	18886548	+	16891	0.377913	0.625232	1.18643	0.0533485	Similar to K12H4.7: Putative serine protease K12H4.7 (Caenorhabditis elegans OX%3D6239)
ANN01311	Chr1	18897428	18912746	-	15319	0.540488	2.0094	0.988542	2.51424	Similar to Ano10: Anoctamin-10 (Mus musculus OX%3D10090)
ANN01312	Chr1	18955888	18958738	+	2851	7.82961	5.5539	10.5222	4.49778	Similar to VPS33B: Vacuolar protein sorting-associated protein 33B (Bos taurus OX%3D9913)
ANN01313	Chr1	18983429	18989224	+	5796	2.26884	64.3667	2.62047	68.6467	Protein of unknown function
ANN01314	Chr1	19002972	19008525	-	5554	5.39947	0.377138	10.1704	0	Similar to pcmt: Protein-L-isoaspartate(D-aspartate) O-methyltransferase (Danio rerio OX%3D7955)
ANN01315	Chr1	19021405	19022645	-	1241	0	0	0	0	Protein of unknown function
ANN01316	Chr1	19022693	19025957	-	3265	0	0.166643	0	0.0495005	Similar to pol: RNA-directed DNA polymerase from mobile element jockey (Drosophila melanogaster OX%3D7227)
ANN01317	Chr1	19032593	19037921	-	5329	3.73718	1.08077	2.92059	0.895305	Similar to PIMT1: Protein-L-isoaspartate O-methyltransferase 1 (Arabidopsis thaliana OX%3D3702)
ANN01318	Chr1	19072234	19073551	+	1318	2.83529	0.607295	14.7027	8.39955	Similar to EIF3K: Eukaryotic translation initiation factor 3 subunit K (Homo sapiens OX%3D9606)
ANN01319	Chr1	19075640	19078173	+	2534	0.74967	0.109474	2.69269	1.95628	Similar to CPIJ017839: Eukaryotic translation initiation factor 3 subunit K (Culex quinquefasciatus OX%3D7176)
ANN01320	Chr1	19078730	19078982	+	253	9.39302	3.61368	25.8875	23.4963	Similar to eif3k: Eukaryotic translation initiation factor 3 subunit K (Xenopus tropicalis OX%3D8364)
ANN01321	Chr1	19093497	19098573	-	5077	2.62218	1.17548	4.79803	2.65073	Similar to Casein kinase II subunit alpha (Spodoptera frugiperda OX%3D7108)
ANN01322	Chr1	19113750	19117023	-	3274	26.0183	30.428	22.0986	44.6687	Similar to MRPL18: 39S ribosomal protein L18%2C mitochondrial (Homo sapiens OX%3D9606)
ANN01323	Chr1	19146716	19147199	+	484	3.21578	7.80773	1.46578	0.669026	Protein of unknown function
ANN01324	Chr1	19147394	19150766	+	3373	0.159922	0.297379	0.0288407	0.0634971	Similar to RTase: Probable RNA-directed DNA polymerase from transposon BS (Drosophila melanogaster OX%3D7227)
ANN01325	Chr1	19162735	19164866	+	2132	0.0439767	0	0.0456363	0	Similar to X-element\ORF2: Probable RNA-directed DNA polymerase from transposon X-element (Drosophila melanogaster OX%3D7227)
ANN01326	Chr1	19170599	19172801	+	2203	0	0.0839529	0.0247898	0.467822	Similar to Bbs5: Bardet-Biedl syndrome 5 protein homolog (Mus musculus OX%3D10090)
ANN01327	Chr1	19177965	19178707	+	743	0	0	0	0	Similar to mariner\T: Mariner Mos1 transposase (Drosophila mauritiana OX%3D7226)
ANN01328	Chr1	19184064	19209585	-	25522	0.722155	0.584243	1.47037	1.10263	Similar to TRAPPC8: Trafficking protein particle complex subunit 8 (Homo sapiens OX%3D9606)
ANN01329	Chr1	19208326	19213602	+	5277	0.246523	0.355759	0.633856	1.09888	Similar to bbs5: Bardet-Biedl syndrome 5 protein homolog (Danio rerio OX%3D7955)
ANN01330	Chr1	19238908	19247838	+	8931	0.099667	0	0.110721	0.565225	Similar to pif1: ATP-dependent DNA helicase PIF1 (Xenopus laevis OX%3D8355)
ANN01331	Chr1	19269303	19269792	-	490	0	0	0	0	Protein of unknown function
ANN01332	Chr1	19277758	19278247	-	490	0	0	0	0	Protein of unknown function
ANN01333	Chr1	19321256	19331666	-	10411	0.383362	5.94006	0.390251	1.51784	Similar to Gas1: Growth arrest-specific protein 1 (Mus musculus OX%3D10090)
ANN01334	Chr1	19342898	19344447	+	1550	0	0	0	0	Protein of unknown function
ANN01335	Chr1	19406176	19407418	-	1243	0	0	0	0	Similar to RTase: Probable RNA-directed DNA polymerase from transposon BS (Drosophila melanogaster OX%3D7227)
ANN01336	Chr1	19407448	19410106	-	2659	0.0573371	0.20324	0.0410738	0	Similar to RTase: Probable RNA-directed DNA polymerase from transposon BS (Drosophila melanogaster OX%3D7227)
ANN01337	Chr1	19427090	19430989	-	3900	0.0480709	0.0379707	0.0831507	0.045636	Protein of unknown function
ANN01338	Chr1	19512801	19517852	+	5052	0.0858372	0	0.0408682	0.0352276	Similar to pol: Retrovirus-related Pol polyprotein from transposon 297 (Drosophila melanogaster OX%3D7227)
ANN01339	Chr1	19544927	19546496	-	1570	0	0.198083	0	0.169952	Similar to CFDP2: Craniofacial development protein 2 (Tragulus javanicus OX%3D9849)
ANN01340	Chr1	19561501	19573287	+	11787	0.201408	0.339163	0.268489	0.28909	Protein of unknown function
ANN01341	Chr1	19574982	19576999	+	2018	1.38553	2.43098	3.52631	2.15725	Protein of unknown function
ANN01342	Chr1	19607384	19613696	+	6313	0.411169	0.261059	0.714987	0.539683	Protein of unknown function
ANN01343	Chr1	19616743	19625620	+	8878	0.638085	0.526444	0.463665	0.653472	Protein of unknown function
ANN01344	Chr1	19627426	19635740	+	8315	4.45859	3.35472	4.41264	3.34457	Protein of unknown function
ANN01345	Chr1	19642331	19648313	-	5983	18.4594	25.9298	18.0995	21.9821	Similar to CREB1: Cyclic AMP-responsive element-binding protein 1 (Bos taurus OX%3D9913)
ANN01346	Chr1	19659893	19660374	-	482	15.3123	71.5681	18.0538	68.7631	Protein of unknown function
ANN01347	Chr1	19660413	19672721	-	12309	3.93224	13.8216	3.8475	11.7065	Similar to Dab: Protein disabled (Drosophila melanogaster OX%3D7227)
ANN01348	Chr1	19673928	19675652	-	1725	2.5288	1.96412	1.08386	1.573	Protein of unknown function
ANN01349	Chr1	19683086	19688461	+	5376	3.97623	1.92828	2.85869	0.974794	Similar to HM13: Minor histocompatibility antigen H13 (Homo sapiens OX%3D9606)
ANN01350	Chr1	19688816	19704647	+	15832	11.1152	5.60791	11.5868	4.98599	Similar to HM13: Minor histocompatibility antigen H13 (Homo sapiens OX%3D9606)
ANN01351	Chr1	19930444	19939775	+	9332	3.28427	2.07502	4.0454	2.4243	Similar to DCTN2-p50: Dynactin subunit 2 (Aedes aegypti OX%3D7159)
ANN01352	Chr1	19941458	19947923	-	6466	2.36385	1.54097	3.43807	2.85467	Similar to Kifbp: KIF-binding protein (Gallus gallus OX%3D9031)
ANN01353	Chr1	19955025	19962574	-	7550	4.68531	4.17713	4.13994	2.81524	Similar to FBXL20: F-box/LRR-repeat protein 20 (Homo sapiens OX%3D9606)
ANN01354	Chr1	19969643	19975281	+	5639	22.9549	22.3133	23.4518	21.7921	Similar to CPIJ012302: MAU2 chromatid cohesion factor homolog (Culex quinquefasciatus OX%3D7176)
ANN01355	Chr1	19999126	20002735	-	3610	0.0584897	0	0.0269468	0.104096	Protein of unknown function
ANN01356	Chr1	20013455	20016392	-	2938	0	0	0	0.110024	Similar to CFDP2: Craniofacial development protein 2 (Bos taurus OX%3D9913)
ANN01357	Chr1	20017732	20022843	-	5112	0	0	0.0222025	0.034814	Similar to Retrovirus-related Pol polyprotein from type-1 retrotransposable element R1 (Fragment) (Bradysia coprophila OX%3D38358)
ANN01358	Chr1	20023464	20027345	-	3882	0.357699	0.345195	0.719977	0.65092	Protein of unknown function
ANN01359	Chr1	20090383	20119774	-	29392	7.0563	1.94672	9.07505	2.57725	Similar to GluProRS: Bifunctional glutamate/proline--tRNA ligase (Drosophila melanogaster OX%3D7227)
ANN01360	Chr1	20135152	20144185	-	9034	0.0493568	0.473545	0.139917	1.95585	Similar to CPM: Carboxypeptidase M (Pongo abelii OX%3D9601)
ANN01361	Chr1	20139566	20143846	+	4281	0	0	0	0	Protein of unknown function
ANN01362	Chr1	20146404	20150684	-	4281	0.0274241	0.11769	0.038262	0.202938	Similar to X-element\ORF2: Probable RNA-directed DNA polymerase from transposon X-element (Drosophila melanogaster OX%3D7227)
ANN01363	Chr1	20161472	20169584	+	8113	3.64659	2.58102	4.45949	2.30325	Similar to dctn2-a: Dynactin subunit 2-A (Xenopus laevis OX%3D8355)
ANN01364	Chr1	20170123	20170994	+	872	2.58428	2.16642	0.0558272	0	Protein of unknown function
ANN01365	Chr1	20172673	20180054	-	7382	4.6996	4.81893	2.5519	1.56858	Similar to Kifbp: KIF-binding protein (Gallus gallus OX%3D9031)
ANN01366	Chr1	20222775	20226670	+	3896	0.400273	0.561125	0.378462	0.127057	Similar to dnaaf3: Dynein assembly factor 3%2C axonemal (Xenopus laevis OX%3D8355)
ANN01367	Chr1	20249072	20259269	-	10198	0.0207011	0	0	0.0174497	Protein of unknown function
ANN01368	Chr1	20387447	20387936	-	490	5.02244	1.84788	3.3772	0.71051	Similar to GluProRS: Bifunctional glutamate/proline--tRNA ligase (Drosophila melanogaster OX%3D7227)
ANN01369	Chr1	20403733	20404300	-	568	49.0254	16.3109	28.4468	10.5442	Similar to GluProRS: Bifunctional glutamate/proline--tRNA ligase (Drosophila melanogaster OX%3D7227)
ANN01370	Chr1	20413367	20437472	-	24106	2.43491	1.04824	1.83881	0.637231	Similar to GluProRS: Bifunctional glutamate/proline--tRNA ligase (Drosophila melanogaster OX%3D7227)
ANN01371	Chr1	20439480	20442209	+	2730	28.682	8.91018	15.7966	5.31654	Similar to trmt10a: tRNA methyltransferase 10 homolog A (Xenopus tropicalis OX%3D8364)
ANN01372	Chr1	20445583	20450940	-	5358	0.295284	0.354422	0.507867	1.09923	Similar to RTase: Probable RNA-directed DNA polymerase from transposon BS (Drosophila melanogaster OX%3D7227)
ANN01373	Chr1	20455037	20463975	-	8939	0.626126	3.34328	0.266242	2.81419	Similar to CPM: Carboxypeptidase M (Pongo abelii OX%3D9601)
ANN01374	Chr1	20491688	20492741	-	1054	37.3704	28.1843	29.1633	26.916	Similar to C15orf61: Uncharacterized protein C15orf61 (Homo sapiens OX%3D9606)
ANN01375	Chr1	20495109	20496354	+	1246	0	0.323875	0.165803	0.504591	Protein of unknown function
ANN01376	Chr1	20496517	20500210	+	3694	0.0856988	0.233432	0.0295624	0.281768	Similar to RTase: Probable RNA-directed DNA polymerase from transposon BS (Drosophila melanogaster OX%3D7227)
ANN01377	Chr1	20505874	20507424	+	1551	35.5048	25.6833	31.9385	21.5335	Similar to DTD1: D-aminoacyl-tRNA deacylase 1 (Homo sapiens OX%3D9606)
ANN01378	Chr1	20525208	20535159	-	9952	3.5088	4.27449	5.16345	3.29126	Similar to Pgant7: N-acetylgalactosaminyltransferase 7 (Drosophila melanogaster OX%3D7227)
ANN01379	Chr1	20539156	20540184	+	1029	0	0	0	0	Protein of unknown function
ANN01380	Chr1	20565226	20567812	+	2587	22.2678	9.97265	11.7084	4.22094	Similar to PPIH: Peptidyl-prolyl cis-trans isomerase H (Homo sapiens OX%3D9606)
ANN01381	Chr1	20568850	20571976	-	3127	0.535992	0.452248	0.316842	0.378783	Similar to dnaaf3: Dynein assembly factor 3%2C axonemal (Xenopus laevis OX%3D8355)
ANN01382	Chr1	20576116	20580065	-	3950	0.19285	0	0.0615668	0.122742	Similar to pol: Retrovirus-related Pol polyprotein from transposon 17.6 (Drosophila melanogaster OX%3D7227)
ANN01383	Chr1	20613414	20618234	-	4821	1.77616	2.67986	1.70958	2.32329	Protein of unknown function
ANN01384	Chr1	20620304	20637398	+	17095	3.72355	3.24735	3.14124	2.61023	Similar to TBC1D15: TBC1 domain family member 15 (Homo sapiens OX%3D9606)
ANN01385	Chr1	20654828	20661433	-	6606	0.0425652	0.0224145	0	0	Similar to Transposable element Tcb2 transposase (Caenorhabditis briggsae OX%3D6238)
ANN01386	Chr1	20666951	20668180	+	1230	0	0	0.0444158	0	Similar to CFDP2: Craniofacial development protein 2 (Bos taurus OX%3D9913)
ANN01387	Chr1	20762137	20766259	+	4123	0.0284753	0.0224241	0.0137648	0	Similar to Tf2-8: Transposon Tf2-8 polyprotein (Schizosaccharomyces pombe (strain 972 / ATCC 24843) OX%3D284812)
ANN01388	Chr1	20860288	20863135	-	2848	0	0	0	0.749467	Similar to CCDC81: Coiled-coil domain-containing protein 81 (Homo sapiens OX%3D9606)
ANN01389	Chr1	21023627	21024879	-	1253	4.47082	0.16854	3.78133	0	Protein of unknown function
ANN01390	Chr1	21025150	21032478	-	7329	3.07546	0.294023	3.11038	0.147242	Similar to Ccne1: G1/S-specific cyclin-E1 (Rattus norvegicus OX%3D10116)
ANN01391	Chr1	21081784	21095387	-	13604	0.438607	11.0828	0.256302	11.6472	Similar to X-element\ORF2: Probable RNA-directed DNA polymerase from transposon X-element (Drosophila melanogaster OX%3D7227)
ANN01392	Chr1	21125874	21126694	-	821	0	0	0	0	Protein of unknown function
ANN01393	Chr1	21133478	21138695	+	5218	0.298672	0	1.07798	0.0255563	Protein of unknown function
ANN01394	Chr1	21176087	21191051	+	14965	4.62493	2.24861	5.85264	3.27992	Similar to W: Protein white (Ceratitis capitata OX%3D7213)
ANN01395	Chr1	21195598	21203714	+	8117	4.79587	0.117607	5.17678	0.199419	Protein of unknown function
ANN01396	Chr1	21208322	21210604	-	2283	0.451946	0.977754	1.02655	1.26546	Similar to PGAP2: Post-GPI attachment to proteins factor 2 (Drosophila melanogaster OX%3D7227)
ANN01397	Chr1	21213479	21222876	+	9398	1.65714	1.98378	3.07187	2.55779	Similar to Prkra: Interferon-inducible double-stranded RNA-dependent protein kinase activator A (Rattus norvegicus OX%3D10116)
ANN01398	Chr1	21316085	21321343	+	5259	4.70855	0.588438	5.90162	0.863714	Similar to TTPAL: Alpha-tocopherol transfer protein-like (Homo sapiens OX%3D9606)
ANN01399	Chr1	21327206	21352733	+	25528	2.87873	2.80294	2.7545	2.4283	Similar to Pik3cd: Phosphatidylinositol 4%2C5-bisphosphate 3-kinase catalytic subunit delta isoform (Mus musculus OX%3D10090)
ANN01400	Chr1	21382257	21383021	+	765	0.398958	1.40465	0.212176	1.97867	Similar to tc3a: Transposable element Tc3 transposase (Caenorhabditis elegans OX%3D6239)
ANN01401	Chr1	21420863	21428428	-	7566	0.193623	0.29938	0.166507	0.31019	Similar to Adamts16: A disintegrin and metalloproteinase with thrombospondin motifs 16 (Mus musculus OX%3D10090)
ANN01402	Chr1	21600064	21600555	-	492	0	0.256472	0	0	Protein of unknown function
ANN01403	Chr1	21623981	21628325	-	4345	0	0	0	0	Similar to TY3B-I: Transposon Ty3-I Gag-Pol polyprotein (Saccharomyces cerevisiae (strain ATCC 204508 / S288c) OX%3D559292)
ANN01404	Chr1	21628932	21633255	-	4324	0.0216781	0	0.0524991	0	Similar to TY3B-I: Transposon Ty3-I Gag-Pol polyprotein (Saccharomyces cerevisiae (strain ATCC 204508 / S288c) OX%3D559292)
ANN01405	Chr1	21633713	21638057	-	4345	0	0	0	0	Similar to TY3B-I: Transposon Ty3-I Gag-Pol polyprotein (Saccharomyces cerevisiae (strain ATCC 204508 / S288c) OX%3D559292)
ANN01406	Chr1	21651201	21667825	-	16625	1.84931	25.4098	2.00348	20.6337	Similar to Slc1a2: Excitatory amino acid transporter 2 (Mus musculus OX%3D10090)
ANN01407	Chr1	21683965	21689015	-	5051	3.37852	50.2085	3.26496	49.915	Protein of unknown function
ANN01408	Chr1	21690526	21728267	-	37742	0.48921	10.9054	0.756834	9.56627	Similar to Cacna2d4: Voltage-dependent calcium channel subunit alpha-2/delta-4 (Mus musculus OX%3D10090)
ANN01409	Chr1	21740912	21743343	-	2432	31.4582	11.0693	25.2833	9.44574	Similar to nr2c2ap: Nuclear receptor 2C2-associated protein (Danio rerio OX%3D7955)
ANN01410	Chr1	21750217	21753034	+	2818	0	0.0919021	0	0	Similar to RTase: Probable RNA-directed DNA polymerase from transposon BS (Drosophila melanogaster OX%3D7227)
ANN01411	Chr1	21758376	21760887	+	2512	1.89518	0.778433	1.19498	0.605172	Similar to jockey\pol: RNA-directed DNA polymerase from mobile element jockey (Drosophila funebris OX%3D7221)
ANN01412	Chr1	21872639	21876166	+	3528	0.117875	0.120597	0.0482606	0.071034	Similar to RTase: Probable RNA-directed DNA polymerase from transposon BS (Drosophila melanogaster OX%3D7227)
ANN01413	Chr1	22010890	22012771	-	1882	0	0	0.0258509	0	Protein of unknown function
ANN01414	Chr1	22034475	22050826	+	16352	2.66144	0.512917	2.68336	0.392676	Similar to HBP1: HMG box-containing protein 1 (Pongo abelii OX%3D9601)
ANN01415	Chr1	22115647	22117552	-	1906	0.123229	0.143819	0	0	Similar to PGBD3: PiggyBac transposable element-derived protein 3 (Homo sapiens OX%3D9606)
ANN01416	Chr1	22193708	22196809	+	3102	0.381681	0.347239	0.301116	0.252852	Protein of unknown function
ANN01417	Chr1	22297832	22308135	+	10304	0.0961056	0.367893	0.0448382	0.229992	Similar to pou2f1: POU domain%2C class 2%2C transcription factor 1 (Xenopus laevis OX%3D8355)
ANN01418	Chr1	22316031	22334296	-	18266	9.65308	24.5803	13.3345	22.416	Similar to V-type proton ATPase subunit C (Manduca sexta OX%3D7130)
ANN01419	Chr1	22378078	22388045	-	9968	5.55558	3.43604	4.47238	3.80655	Similar to TARBP2: RISC-loading complex subunit TARBP2 (Homo sapiens OX%3D9606)
ANN01420	Chr1	22402977	22419705	+	16729	1.06954	1.99244	0.696845	1.49591	Similar to Ano8: Anoctamin-8 (Mus musculus OX%3D10090)
ANN01421	Chr1	22423350	22428522	+	5173	1.1289	0.854213	2.21987	0.0882573	Similar to X-element\ORF2: Probable RNA-directed DNA polymerase from transposon X-element (Drosophila melanogaster OX%3D7227)
ANN01422	Chr1	22474280	22480339	-	6060	0.1781	0.0207836	0.640833	0.0110024	Similar to K12H4.7: Putative serine protease K12H4.7 (Caenorhabditis elegans OX%3D6239)
ANN01423	Chr1	22532552	22534341	+	1790	1.65829	1.82639	1.35735	3.28656	Similar to PGAP2: Post-GPI attachment to proteins factor 2 (Drosophila melanogaster OX%3D7227)
ANN01424	Chr1	22566620	22571293	-	4674	0.0601633	3.08377	0.0337684	1.33309	Similar to pol: Retrovirus-related Pol polyprotein from type-2 retrotransposable element R2DM (Drosophila melanogaster OX%3D7227)
ANN01425	Chr1	22596272	22614061	+	17790	7.61143	4.11025	7.31387	3.4105	Similar to W: Protein white (Ceratitis capitata OX%3D7213)
ANN01426	Chr1	22622119	22628711	+	6593	7.85448	0.29194	9.91303	0.266006	Protein of unknown function
ANN01427	Chr1	22634588	22644450	-	9863	0.409354	0.61691	0.217635	0.461411	Similar to PGAP2: Post-GPI attachment to proteins factor 2 (Drosophila melanogaster OX%3D7227)
ANN01428	Chr1	22653320	22663368	+	10049	6.28089	6.87795	6.25928	5.44952	Similar to Prkra: Interferon-inducible double-stranded RNA-dependent protein kinase activator A (Rattus norvegicus OX%3D10116)
ANN01429	Chr1	22720979	22736838	+	15860	0.11155	0.292876	0.159407	0.336152	Similar to CAMTA1: Calmodulin-binding transcription activator 1 (Homo sapiens OX%3D9606)
ANN01430	Chr1	22738504	22739773	+	1270	0	0.291354	0	0	Similar to GVQW3: Protein GVQW3 (Homo sapiens OX%3D9606)
ANN01431	Chr1	22739827	22742300	+	2474	0.037895	0.458034	0.200399	0.264643	Similar to Camta1: Calmodulin-binding transcription activator 1 (Mus musculus OX%3D10090)
ANN01432	Chr1	22742906	22751350	+	8445	0.337323	0.462013	0.242861	0.980494	Similar to CAMTA1: Calmodulin-binding transcription activator 1 (Homo sapiens OX%3D9606)
ANN01433	Chr1	22790557	22794185	-	3629	99.2977	58.6277	93.9656	50.4307	Similar to Tipin: TIMELESS-interacting protein (Rattus norvegicus OX%3D10116)
ANN01434	Chr1	22800876	22801628	-	753	0.202465	0	0	0.107427	Protein of unknown function
ANN01435	Chr1	22805379	22807325	-	1947	0.0511589	0	0.0530383	0.137154	Protein of unknown function
ANN01436	Chr1	22812842	22814396	-	1555	0	0.0952688	0.0625811	0.0857962	Protein of unknown function
ANN01437	Chr1	22815279	22815934	-	656	0	0	0	0	Similar to Cilp: Cartilage intermediate layer protein 1 (Mus musculus OX%3D10090)
ANN01438	Chr1	22822171	22823422	-	1252	0	0.22166	0	0	Protein of unknown function
ANN01439	Chr1	22823804	22825862	-	2059	0	0.0898272	0	0	Protein of unknown function
ANN01440	Chr1	22832651	22848312	-	15662	0.249908	0.419169	0.267503	0.315286	Similar to Tmem87b: Transmembrane protein 87B (Mus musculus OX%3D10090)
ANN01442	Chr1	22860811	22861433	-	623	3.77739	3.8802	5.80599	3.33	Similar to SRSF7: Serine/arginine-rich splicing factor 7 (Bos taurus OX%3D9913)
ANN01443	Chr1	22869587	22872015	+	2429	2.34152	1.43569	4.47542	3.40001	Similar to MED19: Mediator of RNA polymerase II transcription subunit 19 (Aedes aegypti OX%3D7159)
ANN01444	Chr1	22874533	22888581	-	14049	0.28731	0.409094	0.528219	0.588221	Similar to chst1: Carbohydrate sulfotransferase 1 (Danio rerio OX%3D7955)
ANN01445	Chr1	22901374	22919626	-	18253	1.98568	0.637603	1.02193	0.301296	Similar to wrn: Werner syndrome ATP-dependent helicase homolog (Xenopus laevis OX%3D8355)
ANN01446	Chr1	22931469	22933340	-	1872	6.94429	4.14598	7.8424	4.82702	Similar to nat9: N-acetyltransferase 9-like protein (Nematostella vectensis OX%3D45351)
ANN01447	Chr1	22937313	22946994	-	9682	0.458887	0.201033	0.68713	0.531156	Similar to mepce: 7SK snRNA methylphosphate capping enzyme (Danio rerio OX%3D7955)
ANN01448	Chr1	23011115	23022666	+	11552	3.84253	1.17317	3.98749	1.25159	Similar to Trip13: Pachytene checkpoint protein 2 homolog (Rattus norvegicus OX%3D10116)
ANN01449	Chr1	23035038	23043212	+	8175	306.786	25.1106	378.315	28.5159	Similar to exu: Maternal protein exuperantia (Drosophila virilis OX%3D7244)
ANN01450	Chr1	23049400	23054260	-	4861	10.9845	4.78785	10.2732	4.21596	Similar to Nthl1: Endonuclease III-like protein 1 (Mus musculus OX%3D10090)
ANN01451	Chr1	23054406	23055573	+	1168	0.0451569	0.126862	0.0833342	0.276898	Similar to Transposable element Tcb1 transposase (Caenorhabditis briggsae OX%3D6238)
ANN01452	Chr1	23057803	23059680	+	1878	12.2011	15.057	10.6926	6.53868	Similar to Hsf: Heat shock factor protein (Drosophila melanogaster OX%3D7227)
ANN01453	Chr1	23065024	23070202	-	5179	14.1837	11.738	14.2282	9.53371	Similar to HOOK3: Protein Hook homolog 3 (Homo sapiens OX%3D9606)
ANN01454	Chr1	23071050	23083870	+	12821	19.83	24.1222	13.1475	11.8324	Similar to Hsf: Heat shock factor protein (Drosophila melanogaster OX%3D7227)
ANN01455	Chr1	23095567	23110591	-	15025	15.1871	14.9879	16.0817	12.8628	Similar to SEC62: Translocation protein SEC62 (Pongo abelii OX%3D9601)
ANN01456	Chr1	23113571	23133981	+	20411	4.16515	3.67575	4.73022	3.03288	Similar to PAN2: PAN2-PAN3 deadenylation complex catalytic subunit PAN2 (Drosophila melanogaster OX%3D7227)
ANN01457	Chr1	23135723	23141264	-	5542	19.7151	2.31802	16.3764	1.72499	Protein of unknown function
ANN01458	Chr1	23148080	23150397	+	2318	7.29692	0.576773	10.1946	0	Protein of unknown function
ANN01459	Chr1	23150636	23151180	+	545	13.132	0	13.6432	0.327086	Protein of unknown function
ANN01460	Chr1	23155900	23158122	+	2223	26.23	2.27319	34.9434	0.723811	Protein of unknown function
ANN01461	Chr1	23170328	23180213	-	9886	13.8249	2.98654	17.5584	3.1058	Similar to Ggh: Gamma-glutamyl hydrolase (Mus musculus OX%3D10090)
ANN01462	Chr1	23171359	23171869	+	511	0	0	0	0	Protein of unknown function
ANN01463	Chr1	23185166	23193109	+	7944	50.5699	32.3569	58.9877	36.0442	Similar to Rpt6: 26S proteasome regulatory subunit 8 (Drosophila melanogaster OX%3D7227)
ANN01464	Chr1	23221839	23255681	+	33843	0.606219	38.4377	0.611402	31.3891	Similar to PTPRN2: Receptor-type tyrosine-protein phosphatase N2 (Macaca nemestrina OX%3D9545)
ANN01465	Chr1	23263613	23268916	+	5304	0.0574216	0.0516643	0.0366777	0.386274	Similar to RTase: Probable RNA-directed DNA polymerase from transposon BS (Drosophila melanogaster OX%3D7227)
ANN01466	Chr1	23283072	23303734	-	20663	0.523287	1.5704	0.478744	1.61581	Similar to PTPMT1: Phosphatidylglycerophosphatase and protein-tyrosine phosphatase 1 (Drosophila melanogaster OX%3D7227)
ANN01467	Chr1	23423291	23424497	+	1207	0	0	0	0	Similar to RTase: Probable RNA-directed DNA polymerase from transposon BS (Drosophila melanogaster OX%3D7227)
ANN01468	Chr1	23449266	23464508	+	15243	0.0753749	5.6704	0.0794803	4.51659	Protein of unknown function
ANN01469	Chr1	23474705	23484863	+	10159	2.09759	6.11896	2.76968	4.67862	Similar to senju: UDP-galactose transporter senju (Drosophila melanogaster OX%3D7227)
ANN01470	Chr1	23492864	23576807	-	83944	0.310914	3.23338	0.419408	2.64572	Similar to HMCN1: Hemicentin-1 (Homo sapiens OX%3D9606)
ANN01471	Chr1	23582774	23586287	-	3514	0.19356	0.515116	0.340292	0.334158	Similar to Dscam: Down syndrome cell adhesion molecule homolog (Rattus norvegicus OX%3D10116)
ANN01472	Chr1	23587887	23597531	-	9645	0.0807846	0.0986288	0.0157443	0.106408	Protein of unknown function
ANN01473	Chr1	23603152	23603759	-	608	0	0.10373	0.430004	0.293138	Protein of unknown function
ANN01474	Chr1	23623471	23627483	-	4013	0.175156	2.42673	0.0792	1.35279	Similar to Dscam2: Down syndrome cell adhesion molecule-like protein Dscam2 (Drosophila melanogaster OX%3D7227)
ANN01475	Chr1	23657834	23658241	+	408	0.259324	0	0	0.437186	Protein of unknown function
ANN01476	Chr1	23658420	23661021	+	2602	0.103721	0.381428	0	0	Similar to jockey\pol: RNA-directed DNA polymerase from mobile element jockey (Drosophila funebris OX%3D7221)
ANN01477	Chr1	23665639	23669764	+	4126	4.42684	6.68258	5.47399	7.19026	Similar to Fam89b: Leucine repeat adapter protein 25 (Mus musculus OX%3D10090)
ANN01478	Chr1	23674503	23681243	-	6741	20.7319	20.3356	24.1917	22.9718	Similar to Tom40: Mitochondrial import receptor subunit TOM40 homolog 1 (Drosophila melanogaster OX%3D7227)
ANN01479	Chr1	23693618	23711192	-	17575	0.242972	0.260061	0.511095	0.397121	Similar to ZNF850: Zinc finger protein 850 (Homo sapiens OX%3D9606)
ANN01480	Chr1	23717792	23721783	+	3992	6.30935	4.48225	4.92777	4.9566	Protein of unknown function
ANN01481	Chr1	23722096	23723661	+	1566	15.6879	13.9744	13.6129	8.39594	Similar to tbrg1: Transforming growth factor beta regulator 1 (Xenopus tropicalis OX%3D8364)
ANN01482	Chr1	23725237	23734514	-	9278	61.733	11.4765	60.8066	11.7699	Similar to nop2: 25S rRNA (cytosine-C(5))-methyltransferase nop2 (Schizosaccharomyces pombe (strain 972 / ATCC 24843) OX%3D284812)
ANN01483	Chr1	23746021	23775039	-	29019	1.1029	1.24988	1.22538	1.1926	Similar to ACAP2: Arf-GAP with coiled-coil%2C ANK repeat and PH domain-containing protein 2 (Oryctolagus cuniculus OX%3D9986)
ANN01484	Chr1	23835988	23837810	+	1823	0	0	0	0	Protein of unknown function
ANN01485	Chr1	23862039	23874259	+	12221	4.47923	10.2191	4.82278	8.54068	Similar to ABCG4: ATP-binding cassette sub-family G member 4 (Homo sapiens OX%3D9606)
ANN01486	Chr1	23878383	23888342	+	9960	7.37283	0.488573	8.36651	0.594415	Protein of unknown function
ANN01487	Chr1	23891961	23897618	-	5658	20.0557	57.3307	20.7142	41.7355	Similar to ABCG4: ATP-binding cassette sub-family G member 4 (Homo sapiens OX%3D9606)
ANN01488	Chr1	23929689	23946447	-	16759	1.7023	0.674296	1.9101	0.514652	Similar to cmtr1: Cap-specific mRNA (nucleoside-2'-O-)-methyltransferase 1 (Danio rerio OX%3D7955)
ANN01489	Chr1	23947224	23951907	-	4684	4.57473	1.42405	4.75283	0.881454	Similar to R1A1-element\ORF2: Putative 115 kDa protein in type-1 retrotransposable element R1DM (Drosophila melanogaster OX%3D7227)
ANN01490	Chr1	23961003	23964578	-	3576	5.78244	5.32644	6.95159	4.57192	Similar to Fam117b: Protein FAM117B (Mus musculus OX%3D10090)
ANN01491	Chr1	23965317	23966121	-	805	0.24765	0	1.23725	1.39012	Protein of unknown function
ANN01492	Chr1	24008084	24011883	+	3800	8.68538	6.5023	8.81271	5.41912	Protein of unknown function
ANN01493	Chr1	24034528	24053948	+	19421	2.35309	3.89108	2.23315	3.24255	Similar to TRIM2: Tripartite motif-containing protein 2 (Homo sapiens OX%3D9606)
ANN01494	Chr1	24088674	24093145	-	4472	0.658104	2.65691	3.40448	2.79456	Similar to CG5065: Putative fatty acyl-CoA reductase CG5065 (Drosophila melanogaster OX%3D7227)
ANN01495	Chr1	24112227	24113395	-	1169	0	0.107815	0	1.02436	Similar to Transposable element Tcb1 transposase (Caenorhabditis briggsae OX%3D6238)
ANN01496	Chr1	24220324	24232368	-	12045	6.51304	7.18539	8.11537	6.94088	Protein of unknown function
ANN01497	Chr1	24238919	24239278	-	360	107.5	96.2952	104.031	63.2691	Protein of unknown function
ANN01498	Chr1	24369784	24371661	+	1878	0.0499277	0.06709	1.29535	0.84154	Similar to pol: Retrovirus-related Pol polyprotein from type-2 retrotransposable element R2DM (Drosophila melanogaster OX%3D7227)
ANN01499	Chr1	24379188	24386815	+	7628	0.253424	0.695796	0.276316	0.461772	Similar to GVQW3: Protein GVQW3 (Homo sapiens OX%3D9606)
ANN01500	Chr1	24417276	24417624	+	349	0	0.425424	0	0.255653	Protein of unknown function
ANN01501	Chr1	24419792	24424872	+	5081	0	0.024789	0.0857343	0.272551	Protein of unknown function
ANN01502	Chr1	24447767	24457563	+	9797	1.63315	1.24364	2.7187	1.00014	Similar to prmt9: Protein arginine N-methyltransferase 9 (Xenopus laevis OX%3D8355)
ANN01503	Chr1	24457921	24462271	-	4351	0.179169	0.591149	0.321775	0.914632	Similar to Ift52: Intraflagellar transport protein 52 homolog (Mus musculus OX%3D10090)
ANN01504	Chr1	24465636	24468105	-	2470	0.427119	0.251756	0.431576	0.880859	Protein of unknown function
ANN01505	Chr1	24475961	24480870	-	4910	0	0.142521	0.055599	0.0164565	Similar to pol: RNA-directed DNA polymerase from mobile element jockey (Drosophila melanogaster OX%3D7227)
ANN01506	Chr1	24489941	24492632	-	2692	0.625441	2.22607	1.1993	1.80672	Similar to serhl: Serine hydrolase-like protein (Danio rerio OX%3D7955)
ANN01507	Chr1	24493443	24496936	-	3494	0.10745	0.629184	0.475238	0.268459	Similar to serhl: Serine hydrolase-like protein (Danio rerio OX%3D7955)
ANN01508	Chr1	24515518	24520138	-	4621	0.382989	0.46852	0.291569	0.234348	Similar to SZRD1: SUZ domain-containing protein 1 (Bos taurus OX%3D9913)
ANN01509	Chr1	24522432	24532636	+	10205	3.41339	0.869122	1.8718	0.382366	Similar to pold2: DNA polymerase delta subunit 2 (Xenopus laevis OX%3D8355)
ANN01510	Chr1	24536109	24550153	+	14045	11.5124	3.61023	10.2324	3.64472	Similar to Nnp-1: Ribosomal RNA processing protein 1 homolog (Drosophila melanogaster OX%3D7227)
ANN01511	Chr1	24609749	24620883	+	11135	3.66452	2.20099	2.38109	1.66352	Similar to prmt9: Protein arginine N-methyltransferase 9 (Xenopus laevis OX%3D8355)
ANN01512	Chr1	24621226	24627402	-	6177	0.64792	1.15149	0.645707	0.807123	Similar to Ift52: Intraflagellar transport protein 52 homolog (Mus musculus OX%3D10090)
ANN01513	Chr1	24634993	24641562	-	6570	7.01973	5.22909	8.31484	7.73045	Similar to serhl: Serine hydrolase-like protein (Danio rerio OX%3D7955)
ANN01514	Chr1	24643759	24645604	-	1846	2.27678	3.08349	4.84207	5.20695	Similar to serhl: Serine hydrolase-like protein (Danio rerio OX%3D7955)
ANN01515	Chr1	24646438	24653920	-	7483	1.73008	0.815545	1.42955	1.15373	Similar to hmces: Abasic site processing protein HMCES (Xenopus tropicalis OX%3D8364)
ANN01516	Chr1	24675205	24678173	-	2969	0.449833	0.0212143	0.147467	0.142363	Similar to R1A1-element\ORF2: Putative 115 kDa protein in type-1 retrotransposable element R1DM (Drosophila melanogaster OX%3D7227)
ANN01517	Chr1	24678196	24679337	-	1142	0	0	0	0.375306	Similar to gag-pol: Gag-Pol polyprotein (Simian immunodeficiency virus agm.grivet (isolate AGM gr-1) OX%3D31684)
ANN01518	Chr1	24686308	24695892	-	9585	0.394872	0.606992	0.339689	1.0438	Similar to SZRD1: SUZ domain-containing protein 1 (Bos taurus OX%3D9913)
ANN01519	Chr1	24701245	24722381	+	21137	0.179367	0.243081	0.430737	0.283482	Similar to Pold2: DNA polymerase delta subunit 2 (Mus musculus OX%3D10090)
ANN01520	Chr1	24726639	24728771	+	2133	0.376732	0	1.10475	0.0625363	Similar to pold2: DNA polymerase delta subunit 2 (Xenopus laevis OX%3D8355)
ANN01521	Chr1	24800853	24803987	+	3135	116.929	21.2794	71.5477	8.60575	Similar to Eukaryotic translation initiation factor 3 subunit K (Bombyx mori OX%3D7091)
ANN01522	Chr1	24805087	24806805	-	1719	26.3178	21.8222	15.3293	10.4953	Similar to MRPL18: 39S ribosomal protein L18%2C mitochondrial (Homo sapiens OX%3D9606)
ANN01523	Chr1	24821990	24826384	-	4395	0.0426556	0.0935283	0.0612483	0.0671136	Similar to Casein kinase II subunit alpha (Spodoptera frugiperda OX%3D7108)
ANN01524	Chr1	24831433	24832414	+	982	0	0.407649	0	0	Protein of unknown function
ANN01525	Chr1	24837139	24839520	+	2382	0.132797	0.212817	0.18883	0.889484	Protein of unknown function
ANN01526	Chr1	24840206	24841874	+	1669	0	0	0	0	Protein of unknown function
ANN01527	Chr1	24842294	24850799	+	8506	0.0619962	0.664094	0.0499439	0.495692	Similar to HMCN1: Hemicentin-1 (Homo sapiens OX%3D9606)
ANN01528	Chr1	24851464	24872131	-	20668	1.47397	2.1041	1.38036	1.29268	Similar to Hemocytin (Bombyx mori OX%3D7091)
ANN01529	Chr1	24877126	24879656	-	2531	0.115741	0.577959	0.102511	0.11656	Protein of unknown function
ANN01530	Chr1	24879994	24881124	-	1131	0	0	0	0.137727	Protein of unknown function
ANN01531	Chr1	24883754	24928028	-	44275	0.276072	0.434117	0.308228	0.277059	Similar to Hemocytin (Bombyx mori OX%3D7091)
ANN01532	Chr1	24930878	24942191	-	11314	1.60919	1.92227	1.42795	1.03845	Similar to AAEL007402: Mediator of RNA polymerase II transcription subunit 1 (Aedes aegypti OX%3D7159)
ANN01533	Chr1	24944747	24946991	+	2245	5.33377	1.34369	4.51254	0.352064	Similar to Gins3: DNA replication complex GINS protein PSF3 (Mus musculus OX%3D10090)
ANN01534	Chr1	24993270	24996716	+	3447	14.4406	13.3824	15.6555	11.8063	Similar to MIER3: Mesoderm induction early response protein 3 (Macaca fascicularis OX%3D9541)
ANN01535	Chr1	25006881	25020618	-	13738	0.34384	0.266949	0.447331	0.594026	Similar to CERT1: Ceramide transfer protein (Bos taurus OX%3D9913)
ANN01536	Chr1	25014830	25017716	+	2887	0	0	0	0	Similar to CFDP2: Craniofacial development protein 2 (Bos taurus OX%3D9913)
ANN01537	Chr1	25017760	25018598	+	839	0	0	0	0	Protein of unknown function
ANN01538	Chr1	25020952	25024295	-	3344	0.876579	0.833566	1.38811	1.32709	Similar to CERT1: Ceramide transfer protein (Cricetulus griseus OX%3D10029)
ANN01539	Chr1	25030418	25031012	-	595	0	0	0	0	Similar to Retrovirus-related Pol polyprotein from type-1 retrotransposable element R1 4 (Fragment) (Nasonia vitripennis OX%3D7425)
ANN01540	Chr1	25031090	25034875	-	3786	0	1.31194	0	0.148362	Similar to R1A1-element\ORF2: Putative 115 kDa protein in type-1 retrotransposable element R1DM (Drosophila melanogaster OX%3D7227)
ANN01541	Chr1	25044261	25049602	-	5342	0.85446	0.92096	0.700548	0.394203	Similar to Cert1: Ceramide transfer protein (Mus musculus OX%3D10090)
ANN01542	Chr1	25052875	25054417	-	1543	0.300001	1.20244	0	0.28832	Protein of unknown function
ANN01543	Chr1	25054491	25056623	-	2133	0.645599	1.36644	0.0266128	0.297562	Similar to pol: RNA-directed DNA polymerase from mobile element jockey (Drosophila melanogaster OX%3D7227)
ANN01544	Chr1	25113987	25119598	-	5612	0	0	0	0	Protein of unknown function
ANN01545	Chr1	25133224	25142152	-	8929	9.34351	16.088	5.80622	11.6485	Similar to Cyp6a2: Cytochrome P450 6a2 (Drosophila melanogaster OX%3D7227)
ANN01546	Chr1	25175942	25199201	-	23260	0.572683	0.520226	0.507631	0.089659	Similar to SIDT1: SID1 transmembrane family member 1 (Homo sapiens OX%3D9606)
ANN01547	Chr1	25203494	25206487	+	2994	57.4114	81.8786	29.4457	4.2888	Similar to PPIB: Peptidyl-prolyl cis-trans isomerase B (Homo sapiens OX%3D9606)
ANN01548	Chr1	25222697	25224516	-	1820	1.99132	2.89313	0.470589	0.78432	Protein of unknown function
ANN01549	Chr1	25231575	25233839	-	2265	0	2.34687	0	0.0588902	Protein of unknown function
ANN01550	Chr1	25243170	25245537	+	2368	0	0.52851	0	0.0682593	Similar to gprs: Serine-enriched protein (Drosophila melanogaster OX%3D7227)
ANN01551	Chr1	25249651	25256092	-	6442	9.59203	10.0715	11.5384	9.45256	Similar to Mob4: MOB-like protein phocein (Rattus norvegicus OX%3D10116)
ANN01552	Chr1	25303800	25306227	+	2428	0.202693	16.3616	0.295434	18.0044	Protein of unknown function
ANN01553	Chr1	25329916	25335623	-	5708	197.31	193.052	229.819	198.455	Similar to PPIB: Peptidyl-prolyl cis-trans isomerase B (Homo sapiens OX%3D9606)
ANN01554	Chr1	25335986	25346908	+	10923	1.79727	2.1313	1.72785	1.74397	Similar to Retrovirus-related Pol polyprotein from type-1 retrotransposable element R1 (Fragment) (Bradysia coprophila OX%3D38358)
ANN01555	Chr1	25347697	25355908	+	8212	1.0669	1.87988	1.11578	0.944566	Similar to SIDT1: SID1 transmembrane family member 1 (Homo sapiens OX%3D9606)
ANN01556	Chr1	25355936	25368099	+	12164	0.290115	0.646565	0.161198	0.837675	Protein of unknown function
ANN01557	Chr1	25392269	25399062	+	6794	6.73614	10.491	7.56471	19.6551	Similar to Cyp6a2: Cytochrome P450 6a2 (Drosophila melanogaster OX%3D7227)
ANN01558	Chr1	25401070	25411301	-	10232	0.0813894	0.329526	0.0847188	0.731845	Similar to Alp-m: Membrane-bound alkaline phosphatase (Bombyx mori OX%3D7091)
ANN01559	Chr1	25435415	25448048	-	12634	0.214913	10.1101	0.39219	17.0919	Similar to PBB2: Proteasome subunit beta type-7-B (Arabidopsis thaliana OX%3D3702)
ANN01560	Chr1	25462864	25467851	-	4988	5.46149	4.18146	8.31195	3.61551	Similar to akr1a1a: Aldo-keto reductase family 1 member A1-A (Danio rerio OX%3D7955)
ANN01561	Chr1	25469391	25474530	+	5140	1.31879	1.45975	2.32231	2.0987	Similar to Cert1: Ceramide transfer protein (Mus musculus OX%3D10090)
ANN01562	Chr1	25493910	25496562	+	2653	0.112619	0.569571	0.196842	0.245387	Similar to cert1: Ceramide transfer protein (Danio rerio OX%3D7955)
ANN01563	Chr1	25500064	25502267	+	2204	2.29699	2.55336	2.97314	2.77881	Similar to CERT1: Ceramide transfer protein (Bos taurus OX%3D9913)
ANN01564	Chr1	25558719	25572555	+	13837	1.34405	1.47197	1.49998	1.24855	Similar to MED1: Mediator of RNA polymerase II transcription subunit 1 (Drosophila melanogaster OX%3D7227)
ANN01565	Chr1	25575415	25581475	+	6061	0.125646	0.0854416	0.216648	0.0533233	Protein of unknown function
ANN01566	Chr1	25581961	25596669	+	14709	0.492726	0.487098	0.50669	0.31135	Similar to Vwf: von Willebrand factor (Mus musculus OX%3D10090)
ANN01567	Chr1	25598053	25603994	+	5942	0.562118	0.771875	0.943408	1.19435	Similar to Hemocytin (Bombyx mori OX%3D7091)
ANN01568	Chr1	25606504	25608892	-	2389	0	0	0.0882445	0.204856	Similar to R1A1-element\ORF2: Putative 115 kDa protein in type-1 retrotransposable element R1DM (Drosophila melanogaster OX%3D7227)
ANN01569	Chr1	25609424	25613289	-	3866	0.900572	2.30021	0.8362	1.07371	Similar to Retrovirus-related Pol polyprotein from transposon TNT 1-94 (Nicotiana tabacum OX%3D4097)
ANN01570	Chr1	25613600	25614155	-	556	0	0	0	0	Protein of unknown function
ANN01571	Chr1	25619814	25649136	+	29323	1.12965	1.96526	1.6567	3.13101	Similar to Hemocytin (Bombyx mori OX%3D7091)
ANN01572	Chr1	25670475	25675607	-	5133	0.130102	0.871108	0.0402231	0.479163	Similar to RTase: Probable RNA-directed DNA polymerase from transposon BS (Drosophila melanogaster OX%3D7227)
ANN01573	Chr1	25681689	25685777	-	4089	0.0114621	9.0822	0.108929	5.55612	Protein of unknown function
ANN01574	Chr1	25724196	25732581	+	8386	7.0899	0.0251654	5.15575	0.0192689	Protein of unknown function
ANN01575	Chr1	25747438	25751530	-	4093	21.7723	4.34347	26.4323	5.18439	Similar to DDX43: Probable ATP-dependent RNA helicase DDX43 (Homo sapiens OX%3D9606)
ANN01576	Chr1	25753084	25757238	+	4155	8.7515	20.3047	12.5483	20.683	Similar to CG9132: NECAP-like protein CG9132 (Drosophila melanogaster OX%3D7227)
ANN01577	Chr1	25763727	25772117	-	8391	8.11548	0.586313	6.86844	0.235293	Similar to G2/mitotic-specific cyclin-B (Marthasterias glacialis OX%3D7609)
ANN01578	Chr1	25774543	25787685	+	13143	4.22669	2.94888	5.84565	3.44623	Similar to Nsun5: 28S rRNA (cytosine-C(5))-methyltransferase (Drosophila melanogaster OX%3D7227)
ANN01579	Chr1	25803806	25827923	-	24118	4.6799	2.43526	4.50361	1.48765	Similar to Pgant9: Putative polypeptide N-acetylgalactosaminyltransferase 9 (Drosophila melanogaster OX%3D7227)
ANN01580	Chr1	25830349	25833532	-	3184	0.0368756	0	0.0152766	0.370212	Similar to gly-5: Polypeptide N-acetylgalactosaminyltransferase 5 (Caenorhabditis elegans OX%3D6239)
ANN01581	Chr1	25834148	25838729	-	4582	0.476963	0.176921	0.303161	0.27562	Similar to Pgant9: Putative polypeptide N-acetylgalactosaminyltransferase 9 (Drosophila melanogaster OX%3D7227)
ANN01582	Chr1	25944792	25948834	+	4043	0	0	0	0	Protein of unknown function
ANN01583	Chr1	26124166	26129543	+	5378	0.0174287	0.10464	0.123607	0.12628	Similar to GTF2IRD2: General transcription factor II-I repeat domain-containing protein 2A (Homo sapiens OX%3D9606)
ANN01584	Chr1	26131682	26134586	+	2905	0	0	0.019538	0.0612722	Similar to GTF2IRD2: General transcription factor II-I repeat domain-containing protein 2 (Bos taurus OX%3D9913)
ANN01585	Chr1	26222730	26225155	+	2426	2.01059	1.87876	2.94376	1.40463	Similar to Pgant9: Putative polypeptide N-acetylgalactosaminyltransferase 9 (Drosophila melanogaster OX%3D7227)
ANN01586	Chr1	26231807	26237247	+	5441	0.0474167	0.0401397	0.0718226	0.0393589	Similar to Pgant9: Putative polypeptide N-acetylgalactosaminyltransferase 9 (Drosophila melanogaster OX%3D7227)
ANN01587	Chr1	26237548	26240954	+	3407	0.0928328	0.0369724	0	0	Similar to gly-5: Polypeptide N-acetylgalactosaminyltransferase 5 (Caenorhabditis elegans OX%3D6239)
ANN01588	Chr1	26243402	26259508	+	16107	0.501964	0.343223	0.440921	0.43065	Similar to Pgant9: Putative polypeptide N-acetylgalactosaminyltransferase 9 (Drosophila melanogaster OX%3D7227)
ANN01589	Chr1	26259713	26260034	-	322	0.164169	1.38241	0	0.251666	Protein of unknown function
ANN01590	Chr1	26269726	26275781	+	6056	2.3384	1.21443	5.23483	1.76136	Similar to gly-5: Polypeptide N-acetylgalactosaminyltransferase 5 (Caenorhabditis elegans OX%3D6239)
ANN01591	Chr1	26291925	26306599	-	14675	1.72733	1.29171	1.18745	0.393477	Similar to Nsun5: 28S rRNA (cytosine-C(5))-methyltransferase (Drosophila melanogaster OX%3D7227)
ANN01592	Chr1	26311688	26330394	+	18707	10.1588	6.16733	11.8525	8.07148	Similar to ccnb2: G2/mitotic-specific cyclin-B2 (Xenopus laevis OX%3D8355)
ANN01593	Chr1	26350587	26354805	+	4219	6.39428	2.47557	7.16968	1.03314	Similar to DDX43: Probable ATP-dependent RNA helicase DDX43 (Homo sapiens OX%3D9606)
ANN01594	Chr1	26380950	26391758	-	10809	1.85467	0.0116514	3.11683	0.0396211	Similar to TY3B-I: Transposon Ty3-I Gag-Pol polyprotein (Saccharomyces cerevisiae (strain ATCC 204508 / S288c) OX%3D559292)
ANN01595	Chr1	26431981	26446862	+	14882	0	1.88424	0.0396156	1.74108	Protein of unknown function
ANN01596	Chr1	26464625	26466997	-	2373	0.0395086	9.52276	0	36.0298	Similar to Endoglucanase-1 (Aspergillus aculeatus OX%3D5053)
ANN01597	Chr1	26487430	26508734	+	21305	0.052283	0.391232	0.0333329	0.21308	Similar to Coq3: Ubiquinone biosynthesis O-methyltransferase%2C mitochondrial (Rattus norvegicus OX%3D10116)
ANN01598	Chr1	26510009	26510422	+	414	0	0.179235	0	0.822044	Protein of unknown function
ANN01599	Chr1	26514842	26518982	-	4141	0.0368121	3.54761	0.0131853	1.29862	Similar to CG4341: Protein O-mannosyl-transferase TMTC2 (Drosophila melanogaster OX%3D7227)
ANN01600	Chr1	26519486	26531708	+	12223	0	0	0.0172417	0.0109088	Similar to RTase: Probable RNA-directed DNA polymerase from transposon BS (Drosophila melanogaster OX%3D7227)
ANN01601	Chr1	26525620	26541297	-	15678	0.0531157	0.268671	0.0298168	0.1432	Similar to Tmtc2: Protein O-mannosyl-transferase TMTC2 (Mus musculus OX%3D10090)
ANN01602	Chr1	26609532	26615989	-	6458	0	0	0	0	Similar to tc3a: Transposable element Tc3 transposase (Caenorhabditis elegans OX%3D6239)
ANN01603	Chr1	26619173	26625634	-	6462	0	0	0	0	Similar to tc3a: Transposable element Tc3 transposase (Caenorhabditis elegans OX%3D6239)
ANN01604	Chr1	26737391	26738630	+	1240	0	0.621172	0.0784915	0.678433	Similar to R1A1-element\ORF1: Uncharacterized 50 kDa protein in type I retrotransposable element R1DM (Drosophila melanogaster OX%3D7227)
ANN01605	Chr1	26806158	26808275	+	2118	0.326567	0.0873237	1.4318	2.2047	Similar to PIF1: ATP-dependent DNA helicase PIF1 (Candida albicans (strain SC5314 / ATCC MYA-2876) OX%3D237561)
ANN01606	Chr1	26860309	26872356	-	12048	0.00874875	0.853768	0.00906235	0.01477	Similar to pol: RNA-directed DNA polymerase from mobile element jockey (Drosophila melanogaster OX%3D7227)
ANN01607	Chr1	26872563	26873847	-	1285	0	0	0.0425133	0.849586	Similar to Transposon TX1 uncharacterized 82 kDa protein (Xenopus laevis OX%3D8355)
ANN01608	Chr1	27003338	27023048	-	19711	0.0606733	0.240291	0.0409627	0.163098	Similar to Coq3: Ubiquinone biosynthesis O-methyltransferase%2C mitochondrial (Mus musculus OX%3D10090)
ANN01609	Chr1	27049379	27050584	+	1206	1.09902	98.9182	0.617988	139.543	Similar to Endoglucanase-1 (Aspergillus aculeatus OX%3D5053)
ANN01610	Chr1	27093972	27119827	+	25856	0.0838783	6.96136	0.0463579	5.07179	Similar to THSD7B: Thrombospondin type-1 domain-containing protein 7B (Homo sapiens OX%3D9606)
ANN01611	Chr1	27128659	27131569	-	2911	0.181093	0.833286	0.108453	0.177814	Similar to X-element\ORF2: Probable RNA-directed DNA polymerase from transposon X-element (Drosophila melanogaster OX%3D7227)
ANN01612	Chr1	27131644	27132637	-	994	0.224342	0.275907	0.212213	0.38059	Protein of unknown function
ANN01613	Chr1	27151934	27160595	+	8662	0.085252	4.96165	0.172655	4.15875	Similar to RTase: Probable RNA-directed DNA polymerase from transposon BS (Drosophila melanogaster OX%3D7227)
ANN01614	Chr1	27160819	27162883	-	2065	0.272732	0.26548	0.158683	0.0645966	Similar to PIF1: ATP-dependent DNA helicase PIF1 (Homo sapiens OX%3D9606)
ANN01615	Chr1	27166793	27179104	+	12312	0.0152245	4.85449	0.0575073	4.51636	Similar to THSD7B: Thrombospondin type-1 domain-containing protein 7B (Homo sapiens OX%3D9606)
ANN01616	Chr1	27182873	27194045	+	11173	0.0718801	10.7806	0.0583358	6.36911	Similar to X-element\ORF2: Probable RNA-directed DNA polymerase from transposon X-element (Drosophila melanogaster OX%3D7227)
ANN01617	Chr1	27198130	27201905	+	3776	0.0869318	17.2938	0.267121	14.7361	Similar to THSD7A: Thrombospondin type-1 domain-containing protein 7A (Homo sapiens OX%3D9606)
ANN01618	Chr1	27202079	27207917	+	5839	0.170609	43.9057	0.36741	36.6477	Similar to Thsd7a: Thrombospondin type-1 domain-containing protein 7A (Mus musculus OX%3D10090)
ANN01619	Chr1	27214499	27216020	+	1522	51.5265	36.1723	55.3781	33.3633	Similar to cni: Protein cornichon (Drosophila melanogaster OX%3D7227)
ANN01620	Chr1	27231396	27232842	+	1447	63.6238	13.8294	76.3598	15.1931	Similar to Imp4: U3 small nucleolar ribonucleoprotein protein IMP4 (Rattus norvegicus OX%3D10116)
ANN01621	Chr1	27232992	27233529	+	538	118.189	26.114	124.644	33.4463	Protein of unknown function
ANN01622	Chr1	27233812	27234535	+	724	152.259	31.0051	161.128	40.5642	Protein of unknown function
ANN01623	Chr1	27285429	27289624	-	4196	0	0.435591	0	0	Similar to Tf2-9: Transposon Tf2-9 polyprotein (Schizosaccharomyces pombe (strain 972 / ATCC 24843) OX%3D284812)
ANN01624	Chr1	27494372	27502133	+	7762	0	0.184102	0.00703351	0.189863	Protein of unknown function
ANN01625	Chr1	27520117	27524348	-	4232	82.1543	50.0779	53.4273	41.8222	Similar to UCP2: Mitochondrial uncoupling protein 2 (Sus scrofa OX%3D9823)
ANN01626	Chr1	27534686	27539484	-	4799	63.0274	34.3066	40.8885	24.7087	Similar to UCP3: Mitochondrial uncoupling protein 3 (Canis lupus familiaris OX%3D9615)
ANN01627	Chr1	27545629	27548162	-	2534	0.0463384	0.546057	0.0447994	0.349266	Similar to RTase: Probable RNA-directed DNA polymerase from transposon BS (Drosophila melanogaster OX%3D7227)
ANN01628	Chr1	27563521	27575250	+	11730	0.95747	2.0949	1.52944	1.09007	Similar to DDHD1: Phospholipase DDHD1 (Bos taurus OX%3D9913)
ANN01629	Chr1	27599140	27602075	+	2936	0.0957897	1.21056	0.143596	0.110099	Protein of unknown function
ANN01630	Chr1	27602160	27617515	+	15356	0.0480755	0.639907	0.0216102	0.889139	Similar to Retrovirus-related Pol polyprotein from type-1 retrotransposable element R2 (Fragment) (Nasonia vitripennis OX%3D7425)
ANN01631	Chr1	27625049	27628233	-	3185	15.4259	3.14023	14.3827	4.15667	Protein of unknown function
ANN01632	Chr1	27638098	27640738	-	2641	0.159916	0.420682	0.27043	0.134799	Similar to ZMPSTE24: CAAX prenyl protease 1 homolog (Homo sapiens OX%3D9606)
ANN01633	Chr1	27648074	27653622	-	5549	14.0266	37.3194	16.0087	39.5103	Similar to slv: Sugar transporter SWEET1 (Drosophila melanogaster OX%3D7227)
ANN01634	Chr1	27665121	27696419	-	31299	1.17508	4.3406	1.21086	2.21174	Similar to DOT1L: Histone-lysine N-methyltransferase%2C H3 lysine-79 specific (Homo sapiens OX%3D9606)
ANN01635	Chr1	27789095	27802822	+	13728	0.57711	31.4874	0.391087	32.176	Similar to Syt1: Synaptotagmin 1 (Drosophila melanogaster OX%3D7227)
ANN01636	Chr1	27831684	27847929	-	16246	0.409104	0.626311	0.278072	0.58948	Similar to Nep1: Neprilysin-1 (Drosophila melanogaster OX%3D7227)
ANN01637	Chr1	27853369	27856798	-	3430	0.133292	0.273106	0.109696	0.218115	Protein of unknown function
ANN01638	Chr1	27857137	27865046	-	7910	0.214123	0.442094	0.160641	0.230645	Similar to MMEL1: Membrane metallo-endopeptidase-like 1 (Homo sapiens OX%3D9606)
ANN01639	Chr1	27894196	27896005	-	1810	2.39691	2.77544	2.20176	1.25456	Similar to ddx42: ATP-dependent RNA helicase DDX42 (Xenopus laevis OX%3D8355)
ANN01640	Chr1	27904772	27920090	-	15319	2.6805	2.18207	2.63253	2.23949	Similar to DDX42: ATP-dependent RNA helicase DDX42 (Gallus gallus OX%3D9031)
ANN01641	Chr1	27963302	27964286	-	985	0.881831	0.0639878	0.797955	0	Protein of unknown function
ANN01642	Chr1	28014600	28020144	-	5545	1.29591	0.906548	0.589928	0.308342	Similar to amx: TM2 domain-containing protein almondex (Drosophila melanogaster OX%3D7227)
ANN01643	Chr1	28090870	28094548	+	3679	0.509736	0.0744904	0.415499	0.160357	Protein of unknown function
ANN01644	Chr1	28205536	28206532	+	997	0.982722	0.0743211	1.35368	0.567765	Protein of unknown function
ANN01645	Chr1	28219288	28222788	+	3501	0.0301132	0.0422993	0.032422	0.0380935	Similar to RTase: Probable RNA-directed DNA polymerase from transposon BS (Drosophila melanogaster OX%3D7227)
ANN01646	Chr1	28341816	28345794	-	3979	0	0.0372166	0.0122236	0	Similar to X-element\ORF2: Probable RNA-directed DNA polymerase from transposon X-element (Drosophila melanogaster OX%3D7227)
ANN01647	Chr1	28358719	28371318	-	12600	0.0856754	4.91682	0.0266789	5.75843	Similar to RTase: Probable RNA-directed DNA polymerase from transposon BS (Drosophila melanogaster OX%3D7227)
ANN01648	Chr1	28586281	28588730	-	2450	0	0.0754856	0	0	Protein of unknown function
ANN01649	Chr1	28589083	28592323	-	3241	0	0	0	0.0205752	Protein of unknown function
ANN01650	Chr1	28619880	28640420	+	20541	0.438418	0.556398	0.570928	1.83138	Similar to LRRFIP2: Leucine-rich repeat flightless-interacting protein 2 (Bos taurus OX%3D9913)
ANN01651	Chr1	28671192	28675997	+	4806	0.179275	0.255681	0.1896	0.0740623	Protein of unknown function
ANN01652	Chr1	28695519	28701338	-	5820	0.0584545	0.0985379	0.0688996	0.20838	Protein of unknown function
ANN01653	Chr1	28845366	28854923	+	9558	0.0993468	0.200591	0.0114235	0.107403	Protein of unknown function
ANN01654	Chr1	28854965	28860761	+	5797	0.375971	0.900747	0.226078	0.369542	Similar to Camta1: Calmodulin-binding transcription activator 1 (Mus musculus OX%3D10090)
ANN01655	Chr1	28860812	28861070	+	259	0	0.716528	0	0	Protein of unknown function
ANN01656	Chr1	28864600	28877287	+	12688	0.460477	1.66449	0.498112	1.34074	Similar to CAMTA1: Calmodulin-binding transcription activator 1 (Homo sapiens OX%3D9606)
ANN01657	Chr1	28905444	28909757	-	4314	0	0.0343259	0.0131552	0	Similar to CG10336: Protein TIPIN homolog (Drosophila melanogaster OX%3D7227)
ANN01658	Chr1	28947722	28961087	-	13366	0.61388	0.696996	0.475161	0.387176	Similar to tmem87a: Transmembrane protein 87A (Xenopus tropicalis OX%3D8364)
ANN01660	Chr1	28987961	28988581	-	621	1.37951	2.20349	1.28566	1.07562	Similar to SRSF7: Serine/arginine-rich splicing factor 7 (Bos taurus OX%3D9913)
ANN01661	Chr1	28999432	29013459	-	14028	0.0559464	0.16146	0.084528	0.0847127	Similar to chst1: Carbohydrate sulfotransferase 1 (Danio rerio OX%3D7955)
ANN01662	Chr1	29024953	29039295	-	14343	0.368917	0.206157	1.22459	0.802589	Similar to wrn: Werner syndrome ATP-dependent helicase homolog (Xenopus laevis OX%3D8355)
ANN01663	Chr1	29041774	29048880	+	7107	6.83336	3.51517	5.23167	2.21134	Similar to uri: Unconventional prefoldin RPB5 interactor-like protein (Drosophila melanogaster OX%3D7227)
ANN01664	Chr1	29050101	29051938	-	1838	2.77485	1.23082	4.73229	1.78747	Similar to nat9: N-acetyltransferase 9-like protein (Nematostella vectensis OX%3D45351)
ANN01665	Chr1	29055708	29063294	-	7587	6.07573	3.12346	6.55458	2.82608	Similar to mepce: 7SK snRNA methylphosphate capping enzyme (Danio rerio OX%3D7955)
ANN01666	Chr1	29057965	29059636	+	1672	0	0	0	0	Similar to RTase: Probable RNA-directed DNA polymerase from transposon BS (Drosophila melanogaster OX%3D7227)
ANN01667	Chr1	29072177	29074514	+	2338	0.0251124	0.0633495	0	0	Similar to R1A1-element\ORF2: Putative 115 kDa protein in type-1 retrotransposable element R1DM (Drosophila melanogaster OX%3D7227)
ANN01668	Chr1	29092704	29097608	+	4905	27.9723	11.7868	58.067	18.2911	Similar to Pgp: Glycerol-3-phosphate phosphatase (Rattus norvegicus OX%3D10116)
ANN01669	Chr1	29119764	29122230	-	2467	0	0	0	0.0655189	Protein of unknown function
ANN01670	Chr1	29122730	29123503	-	774	0	0	0	0	Protein of unknown function
ANN01671	Chr1	29126402	29134864	+	8463	4.00746	1.1488	4.17034	1.2233	Similar to Trip13: Pachytene checkpoint protein 2 homolog (Rattus norvegicus OX%3D10116)
ANN01672	Chr1	29143172	29149908	+	6737	6.29339	1.89936	3.67396	0.592759	Protein of unknown function
ANN01673	Chr1	29158061	29158943	+	883	50.6119	19.8751	31.9744	10.1668	Protein of unknown function
ANN01674	Chr1	29160532	29161798	+	1267	0.518168	0.365364	0.0896342	0.127622	Protein of unknown function
ANN01675	Chr1	29177495	29182858	+	5364	1.28551	5.42578	0.889141	1.83918	Protein of unknown function
ANN01676	Chr1	29310391	29316078	-	5688	0.142208	0.520601	0.179109	0.789724	Similar to tmem47: Transmembrane protein 47 (Danio rerio OX%3D7955)
ANN01677	Chr1	29405550	29405876	+	327	0.46749	0	0.33489	0	Similar to Mpdz: Multiple PDZ domain protein (Rattus norvegicus OX%3D10116)
ANN01678	Chr1	29406491	29407179	+	689	0.29811	0	0	0	Protein of unknown function
ANN01679	Chr1	29454200	29466836	-	12637	5.67461	2.67417	7.55925	2.86599	Protein of unknown function
ANN01680	Chr1	29472265	29476231	-	3967	16.0662	40.9136	16.6466	35.4382	Similar to slc25a35: Solute carrier family 25 member 35 (Danio rerio OX%3D7955)
ANN01681	Chr1	29482140	29483650	+	1511	21.0411	27.1098	17.308	33.2921	Similar to B9d1: B9 domain-containing protein 1 (Mus musculus OX%3D10090)
ANN01682	Chr1	29484391	29490920	-	6530	6.47278	7.36985	5.87387	8.41279	Similar to GJ19011: NFU1 iron-sulfur cluster scaffold homolog%2C mitochondrial (Drosophila virilis OX%3D7244)
ANN01683	Chr1	29485356	29489861	+	4506	0	0	0	0	Similar to X-element\ORF2: Probable RNA-directed DNA polymerase from transposon X-element (Drosophila melanogaster OX%3D7227)
ANN01684	Chr1	29519469	29525790	-	6322	0.314265	0.283997	0.175849	0.209395	Similar to acr-16: Acetylcholine receptor subunit alpha-type acr-16 (Caenorhabditis elegans OX%3D6239)
ANN01685	Chr1	29545651	29549091	-	3441	0.180607	0.190452	0.150018	0.184419	Protein of unknown function
ANN01686	Chr1	29556190	29559450	-	3261	0.400628	0.248635	0.345926	0.177351	Similar to CHRNA7: Neuronal acetylcholine receptor subunit alpha-7 (Gallus gallus OX%3D9031)
ANN01687	Chr1	29585353	29588765	+	3413	0	0.0650855	0	0.039076	Similar to X-element\ORF2: Probable RNA-directed DNA polymerase from transposon X-element (Drosophila melanogaster OX%3D7227)
ANN01688	Chr1	29786608	29802895	+	16288	3.98565	2.59374	4.12794	2.37206	Similar to egg: Histone-lysine N-methyltransferase eggless (Drosophila pseudoobscura pseudoobscura OX%3D46245)
ANN01689	Chr1	29804295	29807215	-	2921	34.8951	25.979	33.6702	30.6439	Similar to CG10795: TM2 domain-containing protein CG10795 (Drosophila melanogaster OX%3D7227)
ANN01690	Chr1	29812249	29819816	+	7568	1.39754	1.63609	1.75286	1.27946	Similar to ABCC10: Multidrug resistance-associated protein 7 (Homo sapiens OX%3D9606)
ANN01691	Chr1	29815854	29822805	-	6952	0	0	0	0	Similar to RTase: Probable RNA-directed DNA polymerase from transposon BS (Drosophila melanogaster OX%3D7227)
ANN01692	Chr1	29823490	29823973	-	484	0	0	0	0	Protein of unknown function
ANN01693	Chr1	29854235	29855929	-	1695	0	0.0873953	0.193343	0.0476888	Similar to EFCAB11: EF-hand calcium-binding domain-containing protein 11 (Homo sapiens OX%3D9606)
ANN01694	Chr1	29856737	29859972	+	3236	0.0181415	0	0	0.0499443	Similar to pol: RNA-directed DNA polymerase from mobile element jockey (Drosophila melanogaster OX%3D7227)
ANN01695	Chr1	29863280	29863874	-	595	6.06098	8.57377	1.37724	0.571556	Similar to mariner\T: Mariner Mos1 transposase (Drosophila mauritiana OX%3D7226)
ANN01696	Chr1	29891317	29914879	+	23563	0.220788	0.891592	0.418962	0.477217	Similar to bark: Protein bark beetle (Drosophila melanogaster OX%3D7227)
ANN01697	Chr1	29918367	29924408	+	6042	0.409245	1.04509	0.722587	0.824426	Similar to bark: Protein bark beetle (Drosophila melanogaster OX%3D7227)
ANN01698	Chr1	29924768	29930651	+	5884	1.01459	3.02851	1.29251	1.64834	Similar to bark: Protein bark beetle (Drosophila melanogaster OX%3D7227)
ANN01699	Chr1	29986974	29992550	-	5577	0.199812	5.19329	0.143428	4.98828	Protein of unknown function
ANN01700	Chr1	30001340	30006517	-	5178	0.0859722	21.9737	0.274518	19.6292	Similar to KCNK13: Potassium channel subfamily K member 13 (Homo sapiens OX%3D9606)
ANN01701	Chr1	30008889	30019927	-	11039	0.0807003	0.481653	0.0337323	0.39662	Similar to pyr1: Pyruvate carboxylase (Schizosaccharomyces pombe (strain 972 / ATCC 24843) OX%3D284812)
ANN01702	Chr1	30022671	30027515	-	4845	0.323252	10.5611	0.341131	13.7584	Protein of unknown function
ANN01703	Chr1	30044076	30049375	+	5300	13.9937	2.13199	13.285	1.26064	Similar to ELOVL7: Elongation of very long chain fatty acids protein 7 (Homo sapiens OX%3D9606)
ANN01704	Chr1	30049432	30050884	+	1453	8.99772	2.93812	10.0726	1.95251	Protein of unknown function
ANN01705	Chr1	30055431	30063123	-	7693	2.61347	4.76288	3.11122	4.90466	Protein of unknown function
ANN01706	Chr1	30078516	30099977	+	21462	3.98601	4.44801	3.56728	3.77474	Similar to trappc13: Trafficking protein particle complex subunit 13 (Xenopus tropicalis OX%3D8364)
ANN01707	Chr1	30100959	30106474	-	5516	18.753	14.7809	22.7807	14.1849	Similar to TATDN1: Putative deoxyribonuclease TATDN1 (Bos taurus OX%3D9913)
ANN01708	Chr1	30111489	30112467	-	979	0.647058	3.06845	1.45925	1.30143	Similar to Transposable element Tcb2 transposase (Caenorhabditis briggsae OX%3D6238)
ANN01709	Chr1	30127550	30130256	+	2707	0.359725	0.334924	0.779768	1.03192	Similar to RTase: Probable RNA-directed DNA polymerase from transposon BS (Drosophila melanogaster OX%3D7227)
ANN01710	Chr1	30196288	30197196	+	909	4.37567	7.36878	5.76535	3.06223	Similar to Tnik: Traf2 and NCK-interacting protein kinase (Mus musculus OX%3D10090)
ANN01711	Chr1	30224233	30248953	+	24721	1.835	2.57557	2.33365	1.56316	Similar to MYO3B: Myosin-IIIb (Homo sapiens OX%3D9606)
ANN01712	Chr1	30249680	30251327	+	1648	0.843177	1.43325	1.31492	0.996229	Similar to FAM186A: Protein FAM186A (Mus musculus OX%3D10090)
ANN01713	Chr1	30259291	30264443	-	5153	7.21954	5.19753	9.11367	5.33798	Similar to GMFB: Glia maturation factor beta (Pongo abelii OX%3D9601)
ANN01714	Chr1	30267708	30273354	+	5647	16.5004	6.88521	13.1128	4.70839	Protein of unknown function
ANN01715	Chr1	30321819	30343161	+	21343	4.74996	8.10098	5.43335	6.57318	Similar to mys: Integrin beta-PS (Drosophila melanogaster OX%3D7227)
ANN01716	Chr1	30353378	30354614	-	1237	21.0814	33.9584	21.0551	31.5666	Similar to Khc: Kinesin heavy chain (Drosophila melanogaster OX%3D7227)
ANN01717	Chr1	30355694	30358983	-	3290	3.07846	4.37704	2.98334	4.24233	Similar to Khc: Kinesin heavy chain (Drosophila melanogaster OX%3D7227)
ANN01718	Chr1	30359059	30366737	-	7679	7.47938	11.0538	8.0976	8.99215	Similar to Khc: Kinesin heavy chain (Drosophila melanogaster OX%3D7227)
ANN01719	Chr1	30366778	30377788	-	11011	5.14971	8.29071	6.96024	6.86537	Similar to Khc: Kinesin heavy chain (Drosophila melanogaster OX%3D7227)
ANN01720	Chr1	30384876	30399948	-	15073	2.14454	9.09553	2.96209	10.2211	Similar to arhgap21-b: Rho GTPase-activating protein 21-B (Xenopus laevis OX%3D8355)
ANN01721	Chr1	30425963	30445930	-	19968	5.53724	11.4365	4.86522	6.59152	Similar to X-element\ORF2: Probable RNA-directed DNA polymerase from transposon X-element (Drosophila melanogaster OX%3D7227)
ANN01722	Chr1	30460467	30464190	+	3724	0	0	0	0	Similar to pol: RNA-directed DNA polymerase from mobile element jockey (Drosophila melanogaster OX%3D7227)
ANN01723	Chr1	30471183	30475422	+	4240	0	0.0174626	0.022942	0.418052	Similar to Cyp4g15: Cytochrome P450 4g15 (Drosophila melanogaster OX%3D7227)
ANN01724	Chr1	30504527	30513291	-	8765	3.91807	0.928777	4.9143	0.929736	Similar to PNLIPRP1: Inactive pancreatic lipase-related protein 1 (Homo sapiens OX%3D9606)
ANN01725	Chr1	30515904	30516542	-	639	0	0	0.177863	0	Protein of unknown function
ANN01726	Chr1	30518680	30521688	-	3009	0.128504	0.741507	0.217768	0	Protein of unknown function
ANN01727	Chr1	30544193	30548462	-	4270	0.112498	3.40354	0.0569518	4.0715	Similar to LPL: Lipoprotein lipase (Felis catus OX%3D9685)
ANN01728	Chr1	30594805	30597751	+	2947	0	0	0	0	Similar to R1A1-element\ORF2: Putative 115 kDa protein in type-1 retrotransposable element R1DM (Drosophila melanogaster OX%3D7227)
ANN01729	Chr1	30712863	30747798	-	34936	0.323788	0.603114	0.471151	0.667612	Similar to arhgap21: Rho GTPase-activating protein 21 (Xenopus tropicalis OX%3D8364)
ANN01730	Chr1	30814027	30818464	+	4438	0.0237539	2.96097	0.0474933	3.28142	Similar to LPL: Lipoprotein lipase (Felis catus OX%3D9685)
ANN01731	Chr1	30824705	30835405	+	10701	0.25091	0.110306	0.576034	0.07951	Protein of unknown function
ANN01732	Chr1	30838261	30839227	+	967	0.121506	0	0.117471	0	Protein of unknown function
ANN01733	Chr1	30839263	30839718	+	456	0	0	0	0	Protein of unknown function
ANN01734	Chr1	30842047	30857343	+	15297	1.29908	0.32774	1.1261	0.332354	Similar to Pnliprp1: Inactive pancreatic lipase-related protein 1 (Mus musculus OX%3D10090)
ANN01735	Chr1	30862074	30886036	-	23963	0.354263	0.224328	0.373443	0.0731789	Similar to Mccc2: Probable methylcrotonoyl-CoA carboxylase beta chain%2C mitochondrial (Drosophila melanogaster OX%3D7227)
ANN01736	Chr1	30892969	30899375	+	6407	11.9188	0.761599	11.9175	0.984599	Similar to CYP4C1: Cytochrome P450 4C1 (Blaberus discoidalis OX%3D6981)
ANN01737	Chr1	30905384	30906079	+	696	5.052	0.617801	7.52755	0.424312	Protein of unknown function
ANN01738	Chr1	30907376	30911374	+	3999	3.4742	0.189659	4.37422	0.250662	Similar to CYP4C1: Cytochrome P450 4C1 (Blaberus discoidalis OX%3D6981)
ANN01739	Chr1	30914769	30923445	-	8677	0.426936	14.8086	0.611158	14.4457	Protein of unknown function
ANN01740	Chr1	30926408	30949332	+	22925	0.153628	5.29442	0.149281	6.23091	Similar to CYP4C1: Cytochrome P450 4C1 (Blaberus discoidalis OX%3D6981)
ANN01741	Chr1	30982255	30997252	+	14998	0.0367353	0.591216	0.0291846	0.471775	Similar to CCDC170: Coiled-coil domain-containing protein 170 (Homo sapiens OX%3D9606)
ANN01742	Chr1	31017028	31027446	+	10419	5.31172	5.17828	2.78419	3.60467	Similar to FDPS: Farnesyl pyrophosphate synthase (Bos taurus OX%3D9913)
ANN01743	Chr1	31065839	31073848	+	8010	1.62278	3.47176	1.38377	2.66091	Protein of unknown function
ANN01744	Chr1	31073988	31077292	+	3305	24.3699	62.5641	21.3411	47.0895	Protein of unknown function
ANN01745	Chr1	31078505	31083506	+	5002	58.863	192.122	45.0227	129.933	Protein of unknown function
ANN01746	Chr1	31091808	31097019	+	5212	22.3436	6.2633	12.4101	5.55494	Protein of unknown function
ANN01747	Chr1	31112156	31118438	+	6283	9.72963	9.44645	4.93524	4.34505	Similar to ATG5: Autophagy protein 5 (Homo sapiens OX%3D9606)
ANN01748	Chr1	31124586	31131728	+	7143	5.5671	4.31254	3.49188	3.06643	Similar to CBG06643: L-2-hydroxyglutarate dehydrogenase%2C mitochondrial (Caenorhabditis briggsae OX%3D6238)
ANN01749	Chr1	31132933	31138275	-	5343	79.6105	56.0387	89.0961	49.4042	Similar to Ost48: Dolichyl-diphosphooligosaccharide--protein glycosyltransferase 48 kDa subunit (Drosophila melanogaster OX%3D7227)
ANN01750	Chr1	31240165	31248473	+	8309	0.01128	0.0686171	0.0253644	0	Similar to Transposon TX1 uncharacterized 149 kDa protein (Xenopus laevis OX%3D8355)
ANN01751	Chr1	31406127	31414153	+	8027	0.611258	0.887175	0.941799	0.63566	Similar to Trim9: E3 ubiquitin-protein ligase TRIM9 (Drosophila melanogaster OX%3D7227)
ANN01752	Chr1	31425798	31453327	+	27530	2.10055	0.187639	1.63562	0.055785	Similar to Oca2: P protein (Mus musculus OX%3D10090)
ANN01753	Chr1	31536347	31542591	-	6245	3.08707	2.21658	3.72718	2.21089	Similar to CBG06643: L-2-hydroxyglutarate dehydrogenase%2C mitochondrial (Caenorhabditis briggsae OX%3D6238)
ANN01754	Chr1	31888568	31893051	-	4484	0.272072	17.9151	0.0578526	35.8985	Similar to nhl-1: RING finger protein nhl-1 (Caenorhabditis elegans OX%3D6239)
ANN01755	Chr1	31893403	31910914	-	17512	0.157993	10.2519	0.207637	15.1687	Similar to nhl-1: RING finger protein nhl-1 (Caenorhabditis elegans OX%3D6239)
ANN01756	Chr1	31922052	31929171	-	7120	0.576484	66.2746	1.01655	88.875	Similar to nhl-1: RING finger protein nhl-1 (Caenorhabditis elegans OX%3D6239)
ANN01757	Chr1	31998415	32005661	-	7247	0.0387997	0.0204316	0.0150668	0.00920006	Similar to RTase: Probable RNA-directed DNA polymerase from transposon BS (Drosophila melanogaster OX%3D7227)
ANN01758	Chr1	32028287	32043107	-	14821	0.0134353	0.00998972	0.0507622	0.0467532	Similar to PURA: Transcriptional activator protein Pur-alpha (Homo sapiens OX%3D9606)
ANN01759	Chr1	32217496	32223345	-	5850	7.85911	10.5186	5.10052	5.67236	Protein of unknown function
ANN01760	Chr1	32243351	32245388	+	2038	0	0	0	0	Similar to TIGD1: Tigger transposable element-derived protein 1 (Homo sapiens OX%3D9606)
ANN01761	Chr1	32261619	32272499	-	10881	0.0435922	0	0.0193684	0.0148502	Similar to PURA: Transcriptional activator protein Pur-alpha (Homo sapiens OX%3D9606)
ANN01762	Chr1	32324819	32325335	+	517	0	0	0	0	Protein of unknown function
ANN01763	Chr1	32325452	32326681	+	1230	0	0	0	0	Similar to R1A1-element\ORF2: Putative 115 kDa protein in type-1 retrotransposable element R1DM (Drosophila melanogaster OX%3D7227)
ANN01764	Chr1	32354082	32378444	+	24363	0.0269531	0.224396	0.046938	0.322072	Similar to 5-HT1A: 5-hydroxytryptamine receptor 2A (Drosophila melanogaster OX%3D7227)
ANN01765	Chr1	32382561	32383947	+	1387	0	0	0	0.12838	Similar to RTase: Probable RNA-directed DNA polymerase from transposon BS (Drosophila melanogaster OX%3D7227)
ANN01766	Chr1	32430399	32434486	-	4088	0.0114649	0	0.0133563	0	Similar to pif1: ATP-dependent DNA helicase PIF1 (Danio rerio OX%3D7955)
ANN01767	Chr1	32449968	32454502	-	4535	0.13181	0.983422	0.188527	1.21107	Similar to tc1a: Transposable element Tc1 transposase (Caenorhabditis elegans OX%3D6239)
ANN01768	Chr1	32469260	32473171	-	3912	1.06267	1.7068	2.11192	3.22457	Protein of unknown function
ANN01769	Chr1	32480437	32493602	+	13166	8.02566	2.42541	7.96838	3.57714	Similar to Mcm10: Protein MCM10 homolog (Drosophila melanogaster OX%3D7227)
ANN01770	Chr1	32513723	32520106	-	6384	37.5462	13.516	34.5212	13.841	Similar to U2af38: Splicing factor U2af 38 kDa subunit (Drosophila melanogaster OX%3D7227)
ANN01771	Chr1	32531065	32533489	+	2425	25.1991	19.997	23.3182	16.7045	Similar to ARF6: ADP-ribosylation factor 6 (Gallus gallus OX%3D9031)
ANN01772	Chr1	32567404	32583909	-	16506	0.0607003	1.67292	0.0537555	1.5611	Protein of unknown function
ANN01773	Chr1	32593803	32607928	-	14126	5.4174	1.55195	7.12429	1.48792	Similar to SMC2: Structural maintenance of chromosomes protein 2 (Homo sapiens OX%3D9606)
ANN01774	Chr1	32613042	32620614	+	7573	6.95218	3.08681	6.4063	3.92863	Similar to INTS14: Integrator complex subunit 14 (Gallus gallus OX%3D9031)
ANN01775	Chr1	32634245	32645524	-	11280	1.89815	4.34147	2.24314	4.5627	Similar to Abcg1: ATP-binding cassette sub-family G member 1 (Mus musculus OX%3D10090)
ANN01777	Chr1	32690647	32691322	+	676	0	0	0.432227	0.461129	Similar to Cnbp: Cellular nucleic acid-binding protein (Mus musculus OX%3D10090)
ANN01778	Chr1	32691423	32694303	+	2881	0	0.0514055	0	0.148689	Similar to R1A1-element\ORF2: Putative 115 kDa protein in type-1 retrotransposable element R1DM (Drosophila melanogaster OX%3D7227)
ANN01779	Chr1	32703215	32708196	+	4982	6.71567	4.58636	3.54208	1.66407	Similar to RAB11FIP1: Rab11 family-interacting protein 1 (Homo sapiens OX%3D9606)
ANN01780	Chr1	32735111	32738054	-	2944	0.485497	0.543052	0.070141	0.0548997	Similar to pol: RNA-directed DNA polymerase from mobile element jockey (Drosophila melanogaster OX%3D7227)
ANN01781	Chr1	32876892	32882851	+	5960	0.243973	0.517995	0.0190429	0.0447482	Similar to X-element\ORF2: Probable RNA-directed DNA polymerase from transposon X-element (Drosophila melanogaster OX%3D7227)
ANN01782	Chr1	33072494	33077879	-	5386	3.29529	4.53426	0.42107	2.33035	Protein of unknown function
ANN01783	Chr1	33114120	33117132	+	3013	0.0389692	0.110529	0.0188375	0	Similar to RTase: Probable RNA-directed DNA polymerase from transposon BS (Drosophila melanogaster OX%3D7227)
ANN01784	Chr1	33196567	33198541	+	1975	41.8221	4.64306	70.0493	4.59313	Similar to celf1: CUGBP Elav-like family member 1 (Xenopus tropicalis OX%3D8364)
ANN01785	Chr1	33240076	33246527	-	6452	0.127082	0	0.0954825	0.0250457	Similar to gag: Nucleic-acid-binding protein from mobile element jockey (Drosophila funebris OX%3D7221)
ANN01786	Chr1	33274156	33275344	+	1189	0	0	0.163722	0	Protein of unknown function
ANN01787	Chr1	33385249	33389286	+	4038	2.89714	5.43105	4.03396	3.80623	Similar to mew: Integrin alpha-PS1 (Drosophila melanogaster OX%3D7227)
ANN01789	Chr1	33402023	33420521	+	18499	1.68843	2.43211	2.13699	2.39805	Similar to mew: Integrin alpha-PS1 (Drosophila melanogaster OX%3D7227)
ANN01790	Chr1	33431563	33434089	+	2527	0	0	0	0.0704412	Similar to X-element\ORF2: Probable RNA-directed DNA polymerase from transposon X-element (Drosophila melanogaster OX%3D7227)
ANN01791	Chr1	33448182	33449969	-	1788	0	0	0.0317507	0.0497858	Similar to Retrovirus-related Pol polyprotein from type-1 retrotransposable element R1 (Fragment) (Bradysia coprophila OX%3D38358)
ANN01792	Chr1	33451627	33453414	-	1788	0	0	0	0	Similar to Retrovirus-related Pol polyprotein from type-1 retrotransposable element R1 (Fragment) (Bradysia coprophila OX%3D38358)
ANN01793	Chr1	33537718	33541310	+	3593	0.0326768	0.041216	0.109971	0.0449804	Protein of unknown function
ANN01795	Chr1	33816385	33817542	-	1158	0	0	0	0	Protein of unknown function
ANN01796	Chr1	33820954	33826099	-	5146	0.0182146	0.0848824	0.0432752	0.025914	Similar to X-element\ORF2: Probable RNA-directed DNA polymerase from transposon X-element (Drosophila melanogaster OX%3D7227)
ANN01797	Chr1	33941826	33953517	-	11692	0.184425	0.187073	0.0450198	0.0456171	Protein of unknown function
ANN01798	Chr1	33955066	33966031	+	10966	0.964931	1.04187	1.09797	1.42845	Similar to pol: RNA-directed DNA polymerase from mobile element jockey (Drosophila melanogaster OX%3D7227)
ANN01799	Chr1	34027628	34028048	-	421	0	0	0	0	Protein of unknown function
ANN01800	Chr1	34029717	34033471	+	3755	0.20594	0.161664	0.121341	0.176517	Protein of unknown function
ANN01801	Chr1	34077305	34083504	+	6200	0.124785	0.0865584	0	0.0655215	Similar to RTase: Probable RNA-directed DNA polymerase from transposon BS (Drosophila melanogaster OX%3D7227)
ANN01802	Chr1	34106759	34109948	-	3190	0.0955797	0.0464245	0.0609915	0	Similar to Transposable element Tcb1 transposase (Caenorhabditis briggsae OX%3D6238)
ANN01803	Chr1	34430825	34440795	+	9971	1.1879	1.10072	1.28098	1.05265	Similar to ARHGEF10: Rho guanine nucleotide exchange factor 10 (Homo sapiens OX%3D9606)
ANN01804	Chr1	34441285	34442074	+	790	4.7471	3.46604	6.74102	5.38783	Protein of unknown function
ANN01805	Chr1	34454657	34475095	+	20439	4.77663	4.34154	5.39483	3.78238	Similar to svr: Carboxypeptidase D (Drosophila melanogaster OX%3D7227)
ANN01806	Chr1	34480302	34488333	-	8032	0.0539863	1.55815	0.0902981	0.484024	Similar to GABBR2: Gamma-aminobutyric acid type B receptor subunit 2 (Homo sapiens OX%3D9606)
ANN01807	Chr1	34601683	34605962	+	4280	0.043802	0	0.094702	0	Similar to LINE-1 reverse transcriptase homolog (Nycticebus coucang OX%3D9470)
ANN01808	Chr1	34671597	34679224	+	7628	0.33031	0.403604	0.602286	0.535628	Similar to ARHGEF10L: Rho guanine nucleotide exchange factor 10-like protein (Pongo abelii OX%3D9601)
ANN01809	Chr1	34769816	34771300	+	1485	4.07815	4.02236	3.95394	1.2269	Similar to svr: Carboxypeptidase D (Drosophila melanogaster OX%3D7227)
ANN01810	Chr1	34805864	34821144	-	15281	0.0614031	1.79546	0.142932	2.12542	Similar to GABBR2: Gamma-aminobutyric acid type B receptor subunit 2 (Homo sapiens OX%3D9606)
ANN01811	Chr1	34991260	35000898	-	9639	1.70516	3.29477	1.30867	1.68938	Similar to ex: Protein expanded (Drosophila melanogaster OX%3D7227)
ANN01812	Chr1	35006777	35017677	+	10901	0.0398037	0	0.00892211	0	Protein of unknown function
ANN01813	Chr1	35109464	35125031	+	15568	0.629344	3.02159	0.614387	2.45692	Similar to Plcb4: 1-phosphatidylinositol 4%2C5-bisphosphate phosphodiesterase beta-4 (Rattus norvegicus OX%3D10116)
ANN01814	Chr1	35132069	35142633	+	10565	0.411118	20.189	0.393984	15.6856	Similar to Mal-A2: Maltase A2 (Drosophila melanogaster OX%3D7227)
ANN01815	Chr1	35147589	35156258	-	8670	1.72054	3.36833	2.16146	3.80156	Similar to ex: Protein expanded (Drosophila melanogaster OX%3D7227)
ANN01816	Chr1	35173000	35182483	-	9484	0.0901907	0.161894	0.112942	0.183217	Similar to ex: Protein expanded (Drosophila melanogaster OX%3D7227)
ANN01817	Chr1	35262369	35268761	+	6393	2.76539	1.74143	5.21486	4.42409	Similar to agk: Acylglycerol kinase%2C mitochondrial (Danio rerio OX%3D7955)
ANN01818	Chr1	35271004	35280012	-	9009	0.888279	0.166834	2.09722	0.19563	Similar to Dys: Dystrophin%2C isoform D (Drosophila melanogaster OX%3D7227)
ANN01819	Chr1	35299781	35303321	+	3541	0.0297729	0.230086	0.282672	0.433745	Similar to HARBI1: Putative nuclease HARBI1 (Homo sapiens OX%3D9606)
ANN01820	Chr1	35322812	35331642	-	8831	1.53088	0.845045	2.86498	2.12914	Similar to vir: Protein virilizer (Drosophila melanogaster OX%3D7227)
ANN01821	Chr1	35336193	35351717	-	15525	0.446503	0.318438	1.00334	0.560663	Similar to vir: Protein virilizer (Drosophila melanogaster OX%3D7227)
ANN01822	Chr1	35356718	35359900	-	3183	3.17054	1.30392	7.10708	2.94241	Similar to vir: Protein virilizer (Drosophila pseudoobscura pseudoobscura OX%3D46245)
ANN01823	Chr1	35361199	35366197	-	4999	0.669192	0.424327	1.56761	0.878064	Similar to vir: Protein virilizer (Drosophila melanogaster OX%3D7227)
ANN01824	Chr1	35388108	35390305	+	2198	1.90248	0.670484	2.7134	2.02978	Similar to TRIP4: Activating signal cointegrator 1 (Homo sapiens OX%3D9606)
ANN01825	Chr1	35393263	35395934	+	2672	3.74087	1.50457	5.29994	2.99707	Similar to TRIP4: Activating signal cointegrator 1 (Homo sapiens OX%3D9606)
ANN01826	Chr1	35481477	35492690	+	11214	0.047105	0.0461764	0.0101201	0.0605555	Similar to X-element\ORF2: Probable RNA-directed DNA polymerase from transposon X-element (Drosophila melanogaster OX%3D7227)
ANN01827	Chr1	35520976	35523619	-	2644	0	0	0	0	Similar to X-element\ORF2: Probable RNA-directed DNA polymerase from transposon X-element (Drosophila melanogaster OX%3D7227)
ANN01828	Chr1	35524432	35526416	-	1985	0	0.0373104	0	0	Similar to RTase: Probable RNA-directed DNA polymerase from transposon BS (Drosophila melanogaster OX%3D7227)
ANN01829	Chr1	35534097	35541868	-	7772	4.3792	5.88547	6.55245	8.54351	Similar to Tnpo3: Transportin-3 (Mus musculus OX%3D10090)
ANN01830	Chr1	35544359	35554904	+	10546	0.0789659	0.0649539	0.1525	0.458785	Similar to ZBED9: SCAN domain-containing protein 3 (Homo sapiens OX%3D9606)
ANN01831	Chr1	35556782	35569238	-	12457	4.25729	6.99586	6.89132	9.34506	Similar to Pgm2: Phosphoglucomutase-2 (Mus musculus OX%3D10090)
ANN01832	Chr1	35620317	35624165	+	3849	3.74221	0.22021	1.86768	0	Similar to PCMT1: Protein-L-isoaspartate(D-aspartate) O-methyltransferase (Homo sapiens OX%3D9606)
ANN01833	Chr1	35625342	35637132	+	11791	2.63456	0.0671545	2.04004	0.013704	Similar to PIMT1: Protein-L-isoaspartate O-methyltransferase 1 (Arabidopsis thaliana OX%3D3702)
ANN01834	Chr1	35658204	35672765	-	14562	0.0873941	3.08743	0.165398	0.852548	Protein of unknown function
ANN01835	Chr1	35681385	35698338	+	16954	0.856352	1.04225	1.92332	1.55629	Similar to CWC27: Spliceosome-associated protein CWC27 homolog (Homo sapiens OX%3D9606)
ANN01836	Chr1	35739360	35746842	+	7483	0.625171	0.210206	0.760255	0.530636	Protein of unknown function
ANN01837	Chr1	35747908	35753109	+	5202	0.162345	0.0675486	0.727129	0.933131	Protein of unknown function
ANN01838	Chr1	35753149	35755541	+	2393	18.3302	13.694	5.84401	5.04965	Protein of unknown function
ANN01839	Chr1	35776319	35783368	-	7050	1.21228	22.5396	0.811739	6.61745	Similar to nrv2: Sodium/potassium-transporting ATPase subunit beta-2 (Drosophila melanogaster OX%3D7227)
ANN01840	Chr1	35783627	35784326	+	700	0.28485	0.26447	0	0.115572	Protein of unknown function
ANN01841	Chr1	35793807	35797513	-	3707	0.113918	0.429455	0.0589175	0.0916094	Similar to RTase: Probable RNA-directed DNA polymerase from transposon BS (Drosophila melanogaster OX%3D7227)
ANN01842	Chr1	35804548	35808117	-	3570	9.36204	0.0517972	3.90628	0	Similar to PCMT1: Protein-L-isoaspartate(D-aspartate) O-methyltransferase (Homo sapiens OX%3D9606)
ANN01843	Chr1	35813260	35818541	-	5282	16.8302	0.145736	12.4984	0.05894	Similar to pcmt: Protein-L-isoaspartate(D-aspartate) O-methyltransferase (Danio rerio OX%3D7955)
ANN01844	Chr1	35819948	35822284	-	2337	2.74417	0.237411	2.01969	0	Similar to pcmt: Protein-L-isoaspartate(D-aspartate) O-methyltransferase (Danio rerio OX%3D7955)
ANN01845	Chr1	35857069	35873735	-	16667	0.0531346	0.197849	0.0971766	0.140532	Similar to ex: Protein expanded (Drosophila melanogaster OX%3D7227)
ANN01846	Chr1	35894961	35904958	+	9998	0.565467	0.249529	0.576084	0.348042	Similar to Wdr26: WD repeat-containing protein 26 (Mus musculus OX%3D10090)
ANN01847	Chr1	35936982	35940325	-	3344	0.0596049	0	0.0496298	0	Similar to pol: RNA-directed DNA polymerase from mobile element jockey (Drosophila melanogaster OX%3D7227)
ANN01848	Chr1	35976392	35988242	-	11851	1.3154	0.684217	1.05609	0.261246	Similar to Dys: Dystrophin%2C isoform D (Drosophila melanogaster OX%3D7227)
ANN01849	Chr1	35988633	35992801	-	4169	0.470853	0.598159	0.445748	0.205601	Similar to Dys: Dystrophin%2C isoforms A/C/F/G/H (Drosophila melanogaster OX%3D7227)
ANN01850	Chr1	35999366	36011055	+	11690	8.93047	2.56844	6.56057	1.72917	Similar to Dbp73D: Probable ATP-dependent RNA helicase Dbp73D (Drosophila melanogaster OX%3D7227)
ANN01851	Chr1	36011440	36014872	+	3433	9.26427	2.81649	3.6334	0.599894	Protein of unknown function
ANN01852	Chr1	36017733	36027828	-	10096	1.39668	0.978144	0.827803	0.554769	Similar to Virma: Protein virilizer homolog (Mus musculus OX%3D10090)
ANN01853	Chr1	36031017	36052931	-	21915	1.26125	0.943173	0.872804	0.399078	Similar to vir: Protein virilizer (Drosophila pseudoobscura pseudoobscura OX%3D46245)
ANN01854	Chr1	36061407	36070065	+	8659	1.57556	2.34339	0.656215	0.406041	Similar to TRIP4: Activating signal cointegrator 1 (Homo sapiens OX%3D9606)
ANN01855	Chr1	36087461	36092739	-	5279	0.237756	0.218802	0.364969	0.160064	Similar to jockey\pol: RNA-directed DNA polymerase from mobile element jockey (Drosophila funebris OX%3D7221)
ANN01856	Chr1	36140196	36146146	-	5951	0.0866049	0.0211644	0.093272	0	Similar to pol: Retrovirus-related Pol polyprotein from transposon 297 (Drosophila melanogaster OX%3D7227)
ANN01857	Chr1	36167655	36174618	-	6964	2.47976	2.93978	2.41747	1.95996	Similar to CG4968: Ubiquitin thioesterase otubain-like (Drosophila melanogaster OX%3D7227)
ANN01858	Chr1	36203387	36210126	+	6740	0.0573585	0.0543712	0.0810017	0.0251895	Protein of unknown function
ANN01859	Chr1	36215891	36225248	-	9358	2.70478	5.65764	1.99179	1.16845	Similar to Pgm2: Phosphoglucomutase-2 (Mus musculus OX%3D10090)
ANN01860	Chr1	36298011	36307485	-	9475	5.01891	0.127333	8.41396	0.0757262	Similar to PIMT1: Protein-L-isoaspartate O-methyltransferase 1 (Arabidopsis thaliana OX%3D3702)
ANN01861	Chr1	36313194	36317094	+	3901	0.0750833	0.17279	0.194678	0.171059	Similar to Retrovirus-related Pol polyprotein from type-1 retrotransposable element R2 (Fragment) (Nasonia vitripennis OX%3D7425)
ANN01862	Chr1	36342544	36348155	+	5612	0.0188103	0.0356357	0.010112	0	Protein of unknown function
ANN01863	Chr1	36353891	36371880	-	17990	0.708161	0.0213917	0.96154	0.0538895	Similar to slc46a1: Proton-coupled folate transporter (Xenopus laevis OX%3D8355)
ANN01864	Chr1	36392915	36395865	-	2951	3.16448	0	12.0343	0.0603168	Similar to PCMT1: Protein-L-isoaspartate(D-aspartate) O-methyltransferase (Homo sapiens OX%3D9606)
ANN01865	Chr1	36402073	36411890	-	9818	3.80161	0.122884	11.3525	0.0736601	Similar to pcmt: Protein-L-isoaspartate(D-aspartate) O-methyltransferase (Danio rerio OX%3D7955)
ANN01866	Chr1	36416303	36424364	-	8062	1.70958	0.0229332	4.77636	0	Similar to pcmt: Protein-L-isoaspartate(D-aspartate) O-methyltransferase (Danio rerio OX%3D7955)
ANN01867	Chr1	36425433	36426527	-	1095	12.657	0.405981	25.65	0	Protein of unknown function
ANN01868	Chr1	36427092	36436628	-	9537	28.3295	1.74102	60.732	0.103375	Similar to PCMT1: Protein-L-isoaspartate(D-aspartate) O-methyltransferase (Bos taurus OX%3D9913)
ANN01869	Chr1	36437804	36438041	-	238	65.5448	0.780018	92.9403	0	Protein of unknown function
ANN01870	Chr1	36439515	36441030	-	1516	11.352	1.06978	16.6019	0.346945	Similar to PCMT1: Protein-L-isoaspartate(D-aspartate) O-methyltransferase (Homo sapiens OX%3D9606)
ANN01871	Chr1	36441403	36442146	-	744	17.4551	0.248808	36.4971	0.239481	Protein of unknown function
ANN01872	Chr1	36443214	36448355	+	5142	34.9385	0.769809	53.9082	0.134105	Similar to PCMT1: Protein-L-isoaspartate(D-aspartate) O-methyltransferase (Gallus gallus OX%3D9031)
ANN01873	Chr1	36449000	36450861	+	1862	38.4668	0.882898	45.5899	0.260456	Protein of unknown function
ANN01874	Chr1	36452425	36452782	+	358	323.001	8.26861	466.499	0.452576	Protein of unknown function
ANN01875	Chr1	36453282	36453705	+	424	101.87	1.74813	79.4009	0	Protein of unknown function
ANN01876	Chr1	36454686	36459537	-	4852	0.118511	0	0.0718391	0.0504222	Similar to RTase: Probable RNA-directed DNA polymerase from transposon BS (Drosophila melanogaster OX%3D7227)
ANN01877	Chr1	36467441	36470850	-	3410	0.254626	0.254082	0.0285277	0.350895	Similar to TBC1D19: TBC1 domain family member 19 (Homo sapiens OX%3D9606)
ANN01878	Chr1	36473258	36486038	-	12781	15.4562	9.95059	18.8603	6.50678	Similar to XDH: Xanthine dehydrogenase (Calliphora vicina OX%3D7373)
ANN01879	Chr1	36486650	36487841	+	1192	119.391	0.754728	150.432	0.111946	Protein of unknown function
ANN01880	Chr1	36488643	36496878	-	8236	0.961003	0.353227	1.36913	0.448807	Similar to xdh: Xanthine dehydrogenase (Dictyostelium discoideum OX%3D44689)
ANN01881	Chr1	36498152	36501081	-	2930	0.954163	0.624108	2.32321	1.21514	Similar to Aox4: Aldehyde oxidase 4 (Mus musculus OX%3D10090)
ANN01882	Chr1	36539312	36547275	-	7964	1.52876	1.4891	0.76958	0.355312	Similar to CWC27: Spliceosome-associated protein CWC27 homolog (Homo sapiens OX%3D9606)
ANN01883	Chr1	36567251	36577520	+	10270	0.0741904	2.82651	0.114815	5.43606	Protein of unknown function
ANN01884	Chr1	36577871	36590938	-	13068	0.169542	3.0564	0.162687	3.8849	Similar to Lrfn5: Leucine-rich repeat and fibronectin type-III domain-containing protein 5 (Mus musculus OX%3D10090)
ANN01885	Chr1	36680469	36681968	+	1500	0.203338	1.13032	0.140579	0.552506	Similar to GVQW3: Protein GVQW3 (Homo sapiens OX%3D9606)
ANN01886	Chr1	36718714	36724334	+	5621	17.0864	22.6837	17.0719	36.5784	Similar to jockey\pol: RNA-directed DNA polymerase from mobile element jockey (Drosophila funebris OX%3D7221)
ANN01887	Chr1	36739817	36748183	+	8367	24.262	12.1827	23.1264	18.4651	Similar to Pnkp: Bifunctional polynucleotide phosphatase/kinase (Mus musculus OX%3D10090)
ANN01888	Chr1	36751423	36758702	+	7280	8.75024	4.43639	8.30197	4.05845	Similar to PSR: Bifunctional arginine demethylase and lysyl-hydroxylase PSR (Drosophila melanogaster OX%3D7227)
ANN01889	Chr1	36760972	36765702	-	4731	6.36796	4.69462	6.27755	6.3641	Similar to Transposable element Tcb1 transposase (Caenorhabditis briggsae OX%3D6238)
ANN01890	Chr1	36830224	36841967	-	11744	0.0389612	0.204261	0.0193267	0.331807	Protein of unknown function
ANN01891	Chr1	36924198	36929808	+	5611	0.0104612	0	0	0.0262832	Protein of unknown function
ANN01892	Chr1	36954616	36956713	+	2098	0	0	0.027057	0	Protein of unknown function
ANN01893	Chr1	36958277	36962308	+	4032	0.110414	0.0734546	0.0140755	0	Protein of unknown function
ANN01894	Chr1	36963336	36970821	-	7486	0.0563636	0.287823	0.0567499	0.206725	Similar to F54H12.3: Putative uncharacterized transposon-derived protein F54H12.3 (Caenorhabditis elegans OX%3D6239)
ANN01895	Chr1	36984452	36988704	-	4253	0	0	0	0.0379985	Protein of unknown function
ANN01896	Chr1	37083247	37088231	-	4985	0.0987029	0.0876244	0.0195126	0.0357012	Protein of unknown function
ANN01897	Chr1	37155258	37161354	-	6097	0.0999525	0.0449435	0.0159532	0.0437426	Protein of unknown function
ANN01898	Chr1	37196524	37205903	-	9380	4.35701	4.73928	4.85776	2.17409	Similar to Cpsf73: Cleavage and polyadenylation specificity factor 73 (Drosophila melanogaster OX%3D7227)
ANN01899	Chr1	37208045	37215438	-	7394	2.98002	2.83029	3.00922	1.62896	Similar to Cpsf73: Cleavage and polyadenylation specificity factor 73 (Drosophila melanogaster OX%3D7227)
ANN01900	Chr1	37215652	37216722	-	1071	3.5706	6.196	4.37938	2.72503	Protein of unknown function
ANN01901	Chr1	37224616	37233939	+	9324	6.67998	5.72257	7.67218	4.46	Similar to MALT1: Mucosa-associated lymphoid tissue lymphoma translocation protein 1 (Homo sapiens OX%3D9606)
ANN01902	Chr1	37237536	37264050	-	26515	0.825986	5.80935	0.842405	7.04783	Similar to CG8399: Putative ferric-chelate reductase 1 homolog (Drosophila melanogaster OX%3D7227)
ANN01903	Chr1	37268041	37290100	+	22060	0.15321	0.696478	0.210771	0.794112	Similar to ERCC6: Chimeric ERCC6-PGBD3 protein (Homo sapiens OX%3D9606)
ANN01904	Chr1	37318625	37334839	+	16215	1.60703	0.773947	1.39686	0.646253	Similar to Crtc1: CREB-regulated transcription coactivator 1 (Mus musculus OX%3D10090)
ANN01905	Chr1	37346705	37360049	+	13345	1.31233	1.6068	1.45078	1.58664	Similar to RTase: Probable RNA-directed DNA polymerase from transposon BS (Drosophila melanogaster OX%3D7227)
ANN01907	Chr1	37388300	37398073	+	9774	4.64243	2.24343	5.56227	1.7487	Similar to TKFC: Triokinase/FMN cyclase (Homo sapiens OX%3D9606)
ANN01908	Chr1	37430939	37437113	+	6175	9.51424	7.51717	9.16865	5.98297	Similar to FIG4: Polyphosphoinositide phosphatase (Homo sapiens OX%3D9606)
ANN01910	Chr1	37461673	37462900	-	1228	0.391405	10.8246	0.168236	6.45374	Protein of unknown function
ANN01911	Chr1	37464834	37468841	-	4008	0.102371	2.18605	0.0272458	1.87392	Protein of unknown function
ANN01912	Chr1	37470118	37474768	-	4651	0	4.13231	0.108891	2.85052	Protein of unknown function
ANN01913	Chr1	37502969	37504485	-	1517	0	4.35252	0	4.81165	Protein of unknown function
ANN01914	Chr1	37521052	37528172	-	7121	0	1.2662	0.00796888	1.04692	Similar to Adam11: Disintegrin and metalloproteinase domain-containing protein 11 (Mus musculus OX%3D10090)
ANN01915	Chr1	37529152	37537377	+	8226	0.0798133	0.232999	0.118245	0.702536	Similar to tc3a: Transposable element Tc3 transposase (Caenorhabditis elegans OX%3D6239)
ANN01916	Chr1	37635334	37638127	-	2794	0	0.225435	0	0	Similar to pol: RNA-directed DNA polymerase from mobile element jockey (Drosophila melanogaster OX%3D7227)
ANN01917	Chr1	37638237	37642930	-	4694	0.347237	0.580197	0.100873	0.0912475	Protein of unknown function
ANN01918	Chr1	37687158	37693757	-	6600	0	0.116629	0	0.0446881	Protein of unknown function
ANN01919	Chr1	37724288	37726175	-	1888	0	0	0	0.141311	Protein of unknown function
ANN01920	Chr1	37839146	37842799	-	3654	23.0066	0.334086	31.9009	0.0243546	Similar to se: Pyrimidodiazepine synthase (Drosophila melanogaster OX%3D7227)
ANN01921	Chr1	37929085	37931774	+	2690	24.7325	15.6175	23.9518	20.4685	Similar to Rars2: Probable arginine--tRNA ligase%2C mitochondrial (Mus musculus OX%3D10090)
ANN01922	Chr1	37936817	37942160	-	5344	4.2754	3.74265	3.96667	3.05432	Similar to TFAP4: Transcription factor AP-4 (Homo sapiens OX%3D9606)
ANN01923	Chr1	38014106	38021349	-	7244	2.3851	1.64176	2.92981	1.12367	Similar to Sfmbt: Polycomb protein Sfmbt (Drosophila pseudoobscura pseudoobscura OX%3D46245)
ANN01924	Chr1	38021403	38026179	-	4777	0.110464	0.173568	1.31527	0.924008	Similar to GVQW3: Protein GVQW3 (Homo sapiens OX%3D9606)
ANN01925	Chr1	38026624	38057254	-	30631	0.900062	0.574811	0.934235	0.355883	Similar to Sfmbt: Polycomb protein Sfmbt (Drosophila pseudoobscura pseudoobscura OX%3D46245)
ANN01926	Chr1	38114848	38118731	+	3884	10.6481	6.08181	7.93375	4.68297	Similar to SAP30BP: SAP30-binding protein (Homo sapiens OX%3D9606)
ANN01927	Chr1	38221839	38229552	-	7714	5.80796	4.8801	5.28559	3.91082	Similar to MTMR9: Myotubularin-related protein 9 (Bos taurus OX%3D9913)
ANN01928	Chr1	38271715	38289757	-	18043	0.200486	3.62056	0.242036	2.19355	Similar to st: Protein scarlet (Drosophila melanogaster OX%3D7227)
ANN01929	Chr1	38332226	38335688	-	3463	0.0270694	0.0533981	0.0327778	0.464417	Similar to RTase: Probable RNA-directed DNA polymerase from transposon BS (Drosophila melanogaster OX%3D7227)
ANN01930	Chr1	38340002	38350643	+	10642	3.00561	1.51363	3.44727	1.28287	Similar to OsI_01383: Glucosidase 2 subunit beta (Oryza sativa subsp. indica OX%3D39946)
ANN01931	Chr1	38357399	38374386	-	16988	0.41737	1.53737	0.106563	0.803247	Similar to st: Protein scarlet (Drosophila melanogaster OX%3D7227)
ANN01932	Chr1	38384443	38385808	-	1366	0	0.121946	0	0	Similar to RAB23: Ras-related protein Rab-23 (Homo sapiens OX%3D9606)
ANN01933	Chr1	38443533	38455015	+	11483	0.0163237	0	0.0575102	0	Similar to CFDP2: Craniofacial development protein 2 (Tragulus javanicus OX%3D9849)
ANN01934	Chr1	38523978	38535476	-	11499	3.9484	0.201743	6.20333	0.027071	Similar to Prep: Prolyl endopeptidase (Mus musculus OX%3D10090)
ANN01935	Chr1	38678057	38687414	+	9358	0.00500771	0.0269163	0.0289918	0	Similar to pif1: ATP-dependent DNA helicase PIF1 (Xenopus laevis OX%3D8355)
ANN01936	Chr1	38786050	38790052	-	4003	0.0263359	0.0831864	0	0.0403722	Protein of unknown function
ANN01937	Chr1	38915750	38931998	-	16249	0.0469181	0.0441928	0.0264079	0.0619544	Similar to pif1: ATP-dependent DNA helicase PIF1 (Danio rerio OX%3D7955)
ANN01938	Chr1	38983983	38992536	-	8554	0.819435	4.0024	1.23319	3.42672	Similar to UGT2B7: UDP-glucuronosyltransferase 2B7 (Homo sapiens OX%3D9606)
ANN01939	Chr1	38996559	38998743	-	2185	2.60272	9.12765	3.1548	17.8303	Similar to HSDL1: Hydroxysteroid dehydrogenase-like protein 1 (Gallus gallus OX%3D9031)
ANN01940	Chr1	39034775	39049142	-	14368	0.0522167	0.2901	0.249248	0.704102	Similar to LAC: Lachesin (Schistocerca americana OX%3D7009)
ANN01941	Chr1	39123661	39139524	+	15864	0.0166291	0.0398818	0.0269443	0.0494135	Similar to RTase: Probable RNA-directed DNA polymerase from transposon BS (Drosophila melanogaster OX%3D7227)
ANN01942	Chr1	39156373	39161868	+	5496	0	0.206251	0.0176981	0.029403	Protein of unknown function
ANN01943	Chr1	39231216	39235223	+	4008	6.26288	0.612255	6.47575	0.729664	Similar to Cyp4d2: Cytochrome P450 4d2 (Drosophila melanogaster OX%3D7227)
ANN01944	Chr1	39235930	39241321	+	5392	9.53151	1.76127	8.88456	2.0923	Similar to Cyp4c3: Cytochrome P450 4c3 (Drosophila melanogaster OX%3D7227)
ANN01945	Chr1	39247507	39252190	+	4684	30.8135	113.832	31.2697	150.19	Protein of unknown function
ANN01946	Chr1	39262803	39276319	+	13517	1.61314	1.0467	1.70489	0.940897	Similar to FUZ: Protein fuzzy homolog (Homo sapiens OX%3D9606)
ANN01947	Chr1	39277824	39281393	+	3570	5.33436	3.4912	4.0403	4.17222	Similar to rsph9: Radial spoke head protein 9 homolog (Danio rerio OX%3D7955)
ANN01948	Chr1	39294404	39310504	-	16101	4.81372	2.96078	4.70223	2.20781	Similar to PDZD2: PDZ domain-containing protein 2 (Homo sapiens OX%3D9606)
ANN01949	Chr1	39353376	39357430	-	4055	134.578	63.5749	153.944	52.8505	Similar to SSR2: Translocon-associated protein subunit beta (Bos taurus OX%3D9913)
ANN01950	Chr1	39359658	39366645	+	6988	0.514029	5.73672	1.00694	10.0532	Similar to cahz: Carbonic anhydrase (Danio rerio OX%3D7955)
ANN01951	Chr1	39566189	39570446	+	4258	0	0	0	0.0208991	Protein of unknown function
ANN01952	Chr1	39571367	39574563	+	3197	0	0	0	0.0278371	Similar to RTase: Probable RNA-directed DNA polymerase from transposon BS (Drosophila melanogaster OX%3D7227)
ANN01953	Chr1	39619407	39621702	-	2296	26.5537	25.3166	24.0723	19.6509	Similar to AAEL007634: Protein KRTCAP2 homolog (Aedes aegypti OX%3D7159)
ANN01954	Chr1	39659273	39678048	+	18776	1.99933	3.32574	1.79774	2.94321	Similar to ADAMTS18: A disintegrin and metalloproteinase with thrombospondin motifs 18 (Homo sapiens OX%3D9606)
ANN01955	Chr1	39679103	39683738	-	4636	51.3381	11.019	38.6612	12.7076	Similar to metl: Methyltransferase-like protein (Drosophila melanogaster OX%3D7227)
ANN01956	Chr1	39787866	39800172	+	12307	3.12652	5.80163	4.19671	5.39529	Similar to shep: Protein alan shepard (Drosophila mojavensis OX%3D7230)
ANN01957	Chr1	39837169	39846124	+	8956	0.00588477	0	0	0.00993493	Similar to pif1: ATP-dependent DNA helicase PIF1 (Xenopus laevis OX%3D8355)
ANN01958	Chr1	39858895	39862654	-	3760	0	0	0.0258715	0	Similar to pol: RNA-directed DNA polymerase from mobile element jockey (Drosophila melanogaster OX%3D7227)
ANN01959	Chr1	39866814	39881995	+	15182	13.1716	7.10274	17.311	7.94007	Similar to USP14: Ubiquitin carboxyl-terminal hydrolase 14 (Oryctolagus cuniculus OX%3D9986)
ANN01960	Chr1	39885969	39894973	-	9005	0.511493	0.140612	0.594387	0.328436	Protein of unknown function
ANN01961	Chr1	39960835	39968522	+	7688	0.0335369	0.218546	0.106087	0.211289	Protein of unknown function
ANN01962	Chr1	40161310	40167759	+	6450	0.113565	16.9668	0.144458	17.7509	Protein of unknown function
ANN01963	Chr1	40197768	40204936	-	7169	0	1.12126	0.0423655	0.932242	Protein of unknown function
ANN01964	Chr1	40213523	40219034	-	5512	0	0	0.0264701	0.0120965	Similar to F54H12.3: Putative uncharacterized transposon-derived protein F54H12.3 (Caenorhabditis elegans OX%3D6239)
ANN01965	Chr1	40222601	40224884	-	2284	0.0205244	0	0	0	Similar to R1A1-element\ORF2: Putative 115 kDa protein in type-1 retrotransposable element R1DM (Drosophila melanogaster OX%3D7227)
ANN01966	Chr1	40224907	40225336	-	430	0	0	0	0	Similar to glh-4: ATP-dependent RNA helicase glh-4 (Caenorhabditis elegans OX%3D6239)
ANN01967	Chr1	40225404	40226811	-	1408	0	0	0	0	Protein of unknown function
ANN01968	Chr1	40239029	40241889	+	2861	3.23714	582.275	0.931499	403.289	Similar to xgeA: Probable xyloglucan-specific endo-beta-1%2C4-glucanase A (Aspergillus terreus (strain NIH 2624 / FGSC A1156) OX%3D341663)
ANN01969	Chr1	40285367	40289259	-	3893	0.0240787	0.545944	0.0426291	0.0415133	Similar to TY3B-I: Transposon Ty3-I Gag-Pol polyprotein (Saccharomyces cerevisiae (strain ATCC 204508 / S288c) OX%3D559292)
ANN01970	Chr1	40305946	40306765	+	820	0	0	0	0.217258	Similar to LRGUK: Leucine-rich repeat and guanylate kinase domain-containing protein (Homo sapiens OX%3D9606)
ANN01971	Chr1	40307719	40311039	+	3321	0	0.0445927	0	0.0401588	Similar to Transposon TX1 uncharacterized 82 kDa protein (Xenopus laevis OX%3D8355)
ANN01972	Chr1	40314165	40316596	+	2432	0	0.03045	0	0	Protein of unknown function
ANN01973	Chr1	40459398	40463905	-	4508	2.03428	12.9391	1.68175	7.31546	Similar to HSDL1: Hydroxysteroid dehydrogenase-like protein 1 (Gallus gallus OX%3D9031)
ANN01974	Chr1	40510141	40515759	-	5619	7.84494	3.21215	9.32914	3.53023	Similar to Yju2: Splicing factor YJU2 (Mus musculus OX%3D10090)
ANN01975	Chr1	40545343	40548071	+	2729	3.16233	2.59074	1.9829	0.41623	Similar to Fgd6: FYVE%2C RhoGEF and PH domain-containing protein 6 (Mus musculus OX%3D10090)
ANN01976	Chr1	40563281	40585485	-	22205	2.59416	0.919257	2.35027	0.34795	Similar to Sptlc2: Serine palmitoyltransferase 2 (Mus musculus OX%3D10090)
ANN01977	Chr1	40616586	40620414	+	3829	98.972	319.797	116.562	260.161	Similar to rtn3-b: Reticulon-3-B (Xenopus laevis OX%3D8355)
ANN01978	Chr1	40625135	40647072	-	21938	111.277	35.4459	111.106	36.0448	Similar to GlyP: Glycogen phosphorylase (Drosophila melanogaster OX%3D7227)
ANN01979	Chr1	40704845	40708343	+	3499	14.5704	8.55879	10.1456	6.39139	Similar to galla-1: MIP18 family protein galla-1 (Drosophila melanogaster OX%3D7227)
ANN01980	Chr1	40711293	40712908	-	1616	107.084	40.2881	139.132	56.9381	Similar to Pdrg1: p53 and DNA damage-regulated protein 1 (Rattus norvegicus OX%3D10116)
ANN01981	Chr1	40713187	40714369	-	1183	73.4776	36.5583	70.6234	37.3961	Similar to CG8152: G patch domain and ankyrin repeat-containing protein 1 homolog (Drosophila melanogaster OX%3D7227)
ANN01982	Chr1	40716914	40735663	+	18750	10.3259	8.9731	10.6723	8.73409	Similar to Uncharacterized protein C19orf47 homolog (Rattus norvegicus OX%3D10116)
ANN01983	Chr1	40761932	40765799	-	3868	0.0788218	0.179984	0.0434611	0	Similar to harbi1: Putative nuclease HARBI1 (Danio rerio OX%3D7955)
ANN01984	Chr1	40804797	40805796	+	1000	0	0	0	0.161731	Similar to Transposable element Tcb1 transposase (Caenorhabditis briggsae OX%3D6238)
ANN01985	Chr1	40831154	40844679	+	13526	5.97225	11.4641	6.01898	12.5963	Similar to dnajb6-b: DnaJ homolog subfamily B member 6-B (Xenopus laevis OX%3D8355)
ANN01986	Chr1	40853707	40860000	+	6294	162.834	19.1206	227.896	14.9565	Similar to me31B: ATP-dependent RNA helicase me31b (Drosophila melanogaster OX%3D7227)
ANN01987	Chr1	40866069	40873660	-	7592	3.19047	0.704142	4.96538	6.41256	Similar to nas-4: Zinc metalloproteinase nas-4 (Caenorhabditis elegans OX%3D6239)
ANN01988	Chr1	40891458	40899309	+	7852	67.2368	64.2933	117.527	131.704	Similar to Esterase FE4 (Myzus persicae OX%3D13164)
ANN01989	Chr1	40903269	40915433	-	12165	1.37274	4.50081	2.1616	5.18222	Similar to oaf: Out at first protein (Drosophila melanogaster OX%3D7227)
ANN01990	Chr1	40982604	40986316	+	3713	0.0600138	0.0568458	0.0588223	0.0359179	Similar to RTase: Probable RNA-directed DNA polymerase from transposon BS (Drosophila melanogaster OX%3D7227)
ANN01991	Chr1	40987769	40993376	+	5608	0.190159	0.384805	0.0892423	0.236363	Protein of unknown function
ANN01992	Chr1	41001078	41013150	+	12073	0.756976	0.242867	1.65402	0.431787	Similar to LIPH: Lipase member H (Oryctolagus cuniculus OX%3D9986)
ANN01993	Chr1	41059078	41070010	-	10933	0.0332366	0.062315	0.0706938	0.0580316	Protein of unknown function
ANN01994	Chr1	41071543	41073964	-	2422	25.4775	28.0366	27.7937	27.5221	Similar to SLC7A3: Cationic amino acid transporter 3 (Homo sapiens OX%3D9606)
ANN01996	Chr1	41113848	41130035	-	16188	15.156	15.4475	12.2084	14.2461	Similar to Slc7a1: High affinity cationic amino acid transporter 1 (Mus musculus OX%3D10090)
ANN01998	Chr1	41147414	41155154	-	7741	0.136286	0.00813488	0.0999754	0.210486	Similar to TRPC5: Short transient receptor potential channel 5 (Oryctolagus cuniculus OX%3D9986)
ANN01999	Chr1	41155614	41171203	-	15590	0.048095	0.0287241	0.0599735	0.710551	Similar to Piezo: Piezo-type mechanosensitive ion channel component (Drosophila melanogaster OX%3D7227)
ANN02000	Chr1	41174621	41175454	-	834	0	0	0.131061	0	Protein of unknown function
ANN02001	Chr1	41178510	41180180	-	1671	0	0.0886513	0	0	Similar to Piezo: Piezo-type mechanosensitive ion channel component (Drosophila melanogaster OX%3D7227)
ANN02002	Chr1	41180237	41184270	-	4034	0.0814443	0	0.0782542	0	Similar to Piezo2: Piezo-type mechanosensitive ion channel component 2 (Mus musculus OX%3D10090)
ANN02003	Chr1	41191597	41211638	-	20042	0.241808	0.45278	0.103979	0.36681	Similar to Cht10: Probable chitinase 10 (Drosophila melanogaster OX%3D7227)
ANN02004	Chr1	41238633	41246358	+	7726	0.360968	0.877399	0.650977	0.373022	Protein of unknown function
ANN02005	Chr1	41246884	41248174	-	1291	0	0	0	0	Protein of unknown function
ANN02006	Chr1	41249704	41251576	-	1873	0	0.0987523	0	0.295735	Protein of unknown function
ANN02007	Chr1	41261607	41281771	+	20165	0.199342	0.55018	0.210918	0.210121	Similar to TUBA1C: Tubulin alpha-1C chain (Bos taurus OX%3D9913)
ANN02008	Chr1	41297366	41301684	+	4319	0.0651095	0.674511	0.211764	0.154386	Similar to Dusp19: Dual specificity protein phosphatase 19 (Mus musculus OX%3D10090)
ANN02009	Chr1	41349033	41354866	-	5834	2.84875	1.40592	2.48835	1.12207	Similar to trmt44: Probable tRNA (uracil-O(2)-)-methyltransferase (Xenopus laevis OX%3D8355)
ANN02010	Chr1	41360297	41381783	-	21487	0.141786	0.220476	0.327195	0.341157	Similar to Retrovirus-related Pol polyprotein from type-1 retrotransposable element R1 (Fragment) (Bradysia coprophila OX%3D38358)
ANN02011	Chr1	41380956	41399215	+	18260	3.88527	3.64752	5.67694	4.59133	Similar to GART: Trifunctional purine biosynthetic protein adenosine-3 (Gallus gallus OX%3D9031)
ANN02012	Chr1	41401089	41403203	-	2115	11.788	8.7953	26.1333	22.1882	Similar to bloc1s1: Biogenesis of lysosome-related organelles complex 1 subunit 1 (Xenopus tropicalis OX%3D8364)
[truncated: 17,701 more rows]
