# Supplementary material for: Insights into Bactericera cockerelli and Candidatus Liberibacter solanacearum interaction: a tissue-specific transcriptomic approach
Source: Front Plant Sci. 2024 Aug 30;15:1393994. doi: 10.3389/fpls.2024.1393994 (PMC11392735; doi:10.3389/fpls.2024.1393994)
Supplement: Supplementary file 4 [file DataSheet4.xlsx]

## Sheet: Sheet1
Supplementary Table 3. Expression level (FPKM) of the genes encoding TFs in ovaries and salivary glands under CLso(-) and CLso(+) conditions.
gene	Chr	Start	End	Strand	Length	Ovaries CLso(-)	Salivary glands CLso(-)	Ovaries CLso(+)	Salivary glands CLso(+)	Annotation	TF type
ANN00002	Chr1	14257	16370	+	2114	0.0555491	0.612608	0	0.0764646	Similar to Thap1: THAP domain-containing protein 1 (Rattus norvegicus OX%3D10116)	THAP
ANN00039	Chr1	205225	206746	-	1522	0.138783	0	0.0639388	0.350956	Similar to THAP9: DNA transposase THAP9 (Homo sapiens OX%3D9606)	THAP
ANN00041	Chr1	226637	228738	-	2102	0	0	0.0540109	0	Similar to Jrkl: Jerky protein homolog-like (Mus musculus OX%3D10090)	HTH_psq
ANN00047	Chr1	258194	260579	+	2386	0.452083	1.204	0.854538	1.82314	Similar to TIGD6: Tigger transposable element-derived protein 6 (Homo sapiens OX%3D9606)	HTH_psq
ANN00049	Chr1	295754	297511	+	1758	0.0599864	0	0.0322928	0	Similar to thap1: THAP domain-containing protein 1 (Salmo salar OX%3D8030)	THAP
ANN00050	Chr1	300069	309671	+	9603	0.0195197	0.138766	0.117721	0.322585	Similar to TIGD6: Tigger transposable element-derived protein 6 (Homo sapiens OX%3D9606)	HTH_psq
ANN00079	Chr1	525161	527176	-	2016	0.0261529	0	0.103512	0	Similar to JRKL: Jerky protein homolog-like (Homo sapiens OX%3D9606)	HTH_psq
ANN00119	Chr1	849985	861553	+	11569	0.104879	0.0918401	0.142178	0.113495	Similar to THAP9: DNA transposase THAP9 (Homo sapiens OX%3D9606)	THAP
ANN00170	Chr1	1116940	1118637	+	1698	0.193556	0.217872	0.114615	0.0785665	Similar to thap1: THAP domain-containing protein 1 (Salmo salar OX%3D8030)	THAP
ANN00172	Chr1	1131061	1135542	+	4482	0.085062	0.0965616	0.186297	0.240792	Similar to Sperm acrosomal protein FSA-ACR.1 (Fragment) (Vulpes vulpes OX%3D9627)	HTH_psq
ANN00237	Chr1	1715066	1718299	-	3234	1.87022	6.94078	1.36361	2.8559	Similar to TIGD6: Tigger transposable element-derived protein 6 (Homo sapiens OX%3D9606)	HTH_psq
ANN00243	Chr1	1748178	1749633	+	1456	1.08007	0.203502	0.350585	0.0916339	Similar to ZBED1: Zinc finger BED domain-containing protein 1 (Homo sapiens OX%3D9606)	zf-BED
ANN00246	Chr1	1775512	1777498	+	1987	0	0.167629	0.0549719	0	Similar to JRKL: Jerky protein homolog-like (Homo sapiens OX%3D9606)	HTH_psq
ANN00283	Chr1	1938977	1953773	+	14797	0.150913	0.403512	0.303662	0.234334	Similar to Jrkl: Jerky protein homolog-like (Mus musculus OX%3D10090)	HTH_psq
ANN00286	Chr1	1967165	1968611	-	1447	0.15406	0.102384	0.0672552	0	Similar to ZBED6: Zinc finger BED domain-containing protein 6 (Homo sapiens OX%3D9606)	zf-BED
ANN00346	Chr1	2465963	2468938	-	2976	0.137782	0.0746459	0.0653788	0.029905	Similar to THAP9: DNA transposase THAP9 (Homo sapiens OX%3D9606)	THAP
ANN00383	Chr1	2615944	2617775	+	1832	0.051182	0	0.212454	0.194358	Similar to ZBED1: Zinc finger BED domain-containing protein 1 (Homo sapiens OX%3D9606)	zf-BED
ANN00402	Chr1	2735924	2738284	+	2361	0.193865	0.542698	0.229895	0.143858	Similar to Zbed4: Zinc finger BED domain-containing protein 4 (Mus musculus OX%3D10090)	zf-BED
ANN00403	Chr1	2743698	2746532	+	2835	0	0	0	0	Similar to Ogfr: Opioid growth factor receptor (Mus musculus OX%3D10090)	HTH_psq
ANN00418	Chr1	2842563	2845115	+	2553	0.110166	0.116025	0.0444659	0	Similar to Transposable element Tcb2 transposase (Caenorhabditis briggsae OX%3D6238)	HTH_psq
ANN00440	Chr1	3021433	3028895	-	7463	0.0329627	0	0.114055	0.0216523	Similar to harbi1: Putative nuclease HARBI1 (Danio rerio OX%3D7955)	Homeodomain
ANN00472	Chr1	3204790	3206479	+	1690	0	0	0	0.0394693	Similar to Jrkl: Jerky protein homolog-like (Mus musculus OX%3D10090)	HTH_psq
ANN00551	Chr1	3880365	3881259	-	895	0	0	0	0.0745679	Similar to ZBED1: Zinc finger BED domain-containing protein 1 (Homo sapiens OX%3D9606)	zf-BED
ANN00706	Chr1	5716495	5717767	+	1273	0.0922761	0.890195	0.162284	0	Similar to JRKL: Jerky protein homolog-like (Homo sapiens OX%3D9606)	HTH_psq
ANN00764	Chr1	6340506	6342189	+	1684	0.062624	0.22447	0	0	Similar to Ogfr: Opioid growth factor receptor (Mus musculus OX%3D10090)	HTH_psq
ANN00765	Chr1	6346418	6347753	+	1336	0.702105	0.809307	0.240869	0.425272	Similar to JRKL: Jerky protein homolog-like (Homo sapiens OX%3D9606)	HTH_psq
ANN00925	Chr1	9389676	9392797	+	3122	0.131432	0.433963	0.120522	0.495238	Similar to Ets21C: DNA-binding protein D-ETS-6 (Drosophila melanogaster OX%3D7227)	Ets
ANN00928	Chr1	9446952	9454981	-	8030	1.05425	3.35921	1.56949	3.0056	Similar to EcR: Ecdysone receptor (Aedes aegypti OX%3D7159)	Thyroid_Hormone_Receptor-like
ANN00976	Chr1	10370520	10372329	-	1810	0	0	0	0	Similar to Pogk: Pogo transposable element with KRAB domain (Mus musculus OX%3D10090)	HTH_psq
ANN00988	Chr1	10495284	10498230	-	2947	0.131208	0.396991	0.40554	0.792911	Similar to Zbed4: Zinc finger BED domain-containing protein 4 (Mus musculus OX%3D10090)	zf-BED
ANN01153	Chr1	14601991	14610006	+	8016	0.048227	0.166193	0.0207003	0.125532	Similar to br: Broad-complex core protein isoforms 1/2/3/4/5 (Drosophila melanogaster OX%3D7227)	BTB
ANN01155	Chr1	14696802	14715409	+	18608	0.0519426	0.259748	0.146213	0.242275	Similar to br: Broad-complex core protein isoforms 1/2/3/4/5 (Drosophila melanogaster OX%3D7227)	BTB
ANN01222	Chr1	16095609	16106797	+	11189	0.997546	0.912842	1.16959	1.19724	Similar to ZNF480: Zinc finger protein 480 (Homo sapiens OX%3D9606)	zf-C2H2
ANN01223	Chr1	16108714	16116187	+	7474	7.58735	6.04706	7.51609	7.88129	Similar to Gastrula zinc finger protein XlCGF57.1 (Fragment) (Xenopus laevis OX%3D8355)	zf-C2H2
ANN01225	Chr1	16204041	16208935	+	4895	0.150872	0.189851	0.0533331	0.0842065	Similar to ZNF480: Zinc finger protein 480 (Homo sapiens OX%3D9606)	zf-C2H2
ANN01280	Chr1	18274770	18275416	-	647	1.99439	0.229176	1.30329	0.250108	Similar to ybx2-a: Y-box-binding protein 2-A (Xenopus laevis OX%3D8355)	CSD
ANN01345	Chr1	19642331	19648313	-	5983	18.4594	25.9298	18.0995	21.9821	Similar to CREB1: Cyclic AMP-responsive element-binding protein 1 (Bos taurus OX%3D9913)	TF_bZIP
ANN01385	Chr1	20654828	20661433	-	6606	0.0425652	0.0224145	0	0	Similar to Transposable element Tcb2 transposase (Caenorhabditis briggsae OX%3D6238)	PAX
ANN01414	Chr1	22034475	22050826	+	16352	2.66144	0.512917	2.68336	0.392676	Similar to HBP1: HMG box-containing protein 1 (Pongo abelii OX%3D9601)	HMG_box
ANN01417	Chr1	22297832	22308135	+	10304	0.0961056	0.367893	0.0448382	0.229992	Similar to pou2f1: POU domain%2C class 2%2C transcription factor 1 (Xenopus laevis OX%3D8355)	Pou
ANN01452	Chr1	23057803	23059680	+	1878	12.2011	15.057	10.6926	6.53868	Similar to Hsf: Heat shock factor protein (Drosophila melanogaster OX%3D7227)	HSF_DNA-bind
ANN01479	Chr1	23693618	23711192	-	17575	0.242972	0.260061	0.511095	0.397121	Similar to ZNF850: Zinc finger protein 850 (Homo sapiens OX%3D9606)	zf-H2C2_2
ANN01505	Chr1	24475961	24480870	-	4910	0	0.142521	0.055599	0.0164565	Similar to pol: RNA-directed DNA polymerase from mobile element jockey (Drosophila melanogaster OX%3D7227)	zf-C2H2
ANN01550	Chr1	25243170	25245537	+	2368	0	0.52851	0	0.0682593	Similar to gprs: Serine-enriched protein (Drosophila melanogaster OX%3D7227)	BTB
ANN01650	Chr1	28619880	28640420	+	20541	0.438418	0.556398	0.570928	1.83138	Similar to LRRFIP2: Leucine-rich repeat flightless-interacting protein 2 (Bos taurus OX%3D9913)	LRRFIP
ANN01760	Chr1	32243351	32245388	+	2038	0	0	0	0	Similar to TIGD1: Tigger transposable element-derived protein 1 (Homo sapiens OX%3D9606)	HTH_psq
ANN02016	Chr1	41489259	41505408	+	16150	0.265161	0.251822	0.287748	0.291471	Similar to ZFP28: Zinc finger protein 28 homolog (Homo sapiens OX%3D9606)	zf-C2H2
ANN02073	Chr1	42351650	42359909	-	8260	14.5058	3.26469	12.1315	2.26966	Similar to EME1: Crossover junction endonuclease EME1 (Pongo abelii OX%3D9601)	PAX
ANN02079	Chr1	42445523	42449782	-	4260	0.564281	4.11933	0.58388	3.22196	Similar to POU6F2: POU domain%2C class 6%2C transcription factor 2 (Homo sapiens OX%3D9606)	Pou
ANN02192	Chr1	45666994	45670655	-	3662	17.1328	10.0084	13.8036	7.35383	Similar to ccdc124: Coiled-coil domain-containing protein 124 (Danio rerio OX%3D7955)	HMG_box
ANN02203	Chr1	45921664	45965683	-	44020	2.55132	2.09861	3.45266	2.3696	Similar to Mi-2: Chromodomain-helicase-DNA-binding protein Mi-2 homolog (Drosophila melanogaster OX%3D7227)	SNF2-rel_dom
ANN02206	Chr1	45998259	46055785	+	57527	2.94215	2.2423	3.2711	1.86852	Similar to Mi-2: Chromodomain-helicase-DNA-binding protein Mi-2 homolog (Drosophila melanogaster OX%3D7227)	SNF2-rel_dom
ANN02241	Chr1	46684836	46695759	+	10924	3.55119	1.34741	6.04474	1.85395	Similar to PIAS3: E3 SUMO-protein ligase PIAS3 (Homo sapiens OX%3D9606)	zf-MIZ
ANN02311	Chr1	48403499	48424756	-	21258	0.396353	0.480995	0.492726	0.526888	Similar to Mad: Protein mothers against dpp (Drosophila melanogaster OX%3D7227)	MH1
ANN02319	Chr1	48894787	48896115	+	1329	13.4745	13.7653	14.6664	10.5495	Similar to h: Protein hairy (Drosophila melanogaster OX%3D7227)	HLH
ANN02415	Chr1	51516881	51528722	-	11842	0.0148689	0.0222038	0.0239585	0.0467542	Similar to Shox2: Short stature homeobox protein 2 (Fragment) (Rattus norvegicus OX%3D10116)	Homeodomain
ANN02418	Chr1	51579899	51591194	-	11296	0.22938	0.326629	0.392799	0.408357	Similar to DNA-binding protein P3A2 (Strongylocentrotus purpuratus OX%3D7668)	Nrf1_DNA-bind
ANN02421	Chr1	51616213	51630336	+	14124	0.0834031	0.399571	0.227609	0.517022	Similar to Transposable element Tcb2 transposase (Caenorhabditis briggsae OX%3D6238)	PAX
ANN02426	Chr1	51699365	51709951	-	10587	0.0686758	0.127278	0	0.040452	Similar to Shox2: Short stature homeobox protein 2 (Fragment) (Rattus norvegicus OX%3D10116)	Homeodomain
ANN02427	Chr1	51745482	51760890	-	15409	0.89123	0.728787	0.622776	0.276044	Similar to DNA-binding protein P3A2 (Strongylocentrotus purpuratus OX%3D7668)	Nrf1_DNA-bind
ANN02473	Chr1	53273771	53274957	+	1187	632.941	430.102	559.03	389.724	Similar to lola: Longitudinals lacking protein%2C isoforms H/M/V (Drosophila melanogaster OX%3D7227)	BTB
ANN02551	Chr1	54876611	54897774	-	21164	1.17489	1.43615	1.58907	0.843625	Similar to Chd1: Chromodomain-helicase-DNA-binding protein 1 (Drosophila melanogaster OX%3D7227)	SNF2-rel_dom
ANN02574	Chr1	55824406	55826870	+	2465	0	0	0	0.21644	Similar to GRM6: Metabotropic glutamate receptor 6 (Oryctolagus cuniculus OX%3D9986)	PAX
ANN02607	Chr1	57480915	57495042	+	14128	2.25191	1.46093	2.19909	1.01884	Similar to Kat7: Histone acetyltransferase KAT7 (Mus musculus OX%3D10090)	MOZ_SAS
ANN02609	Chr1	57529289	57534240	+	4952	1.86191	1.32233	1.47507	0.64063	Similar to KAT7: Histone acetyltransferase KAT7 (Homo sapiens OX%3D9606)	MOZ_SAS
ANN02618	Chr1	57913490	57915210	-	1721	1.1921	0.593932	0.225909	0.0775159	Similar to thap1: THAP domain-containing protein 1 (Danio rerio OX%3D7955)	THAP
ANN02628	Chr1	58121485	58139346	-	17862	0.554342	0.18133	0.599835	0.0840672	Similar to ZNF250: Zinc finger protein 250 (Homo sapiens OX%3D9606)	zf-H2C2_2
ANN02658	Chr1	58858524	58884252	+	25729	0.569648	0.679617	0.682493	0.559659	Similar to tgo: Aryl hydrocarbon receptor nuclear translocator homolog (Drosophila melanogaster OX%3D7227)	HLH
ANN02669	Chr1	59181832	59194631	-	12800	1.57644	12.8436	2.23585	12.41	Similar to dl: Embryonic polarity protein dorsal (Drosophila melanogaster OX%3D7227)	RHD_DNA_bind
ANN02691	Chr1	59724065	59728368	-	4304	9.16092	4.15975	10.7152	4.30697	Similar to ZNF585A: Zinc finger protein 585A (Pongo abelii OX%3D9601)	zf-C2H2
ANN02695	Chr1	59805120	59809398	-	4279	8.27419	3.08315	5.98014	2.27975	Similar to Zfp26: Zinc finger protein 26 (Mus musculus OX%3D10090)	zf-C2H2
ANN02696	Chr1	59815821	59823433	+	7613	8.49031	2.66997	6.78274	3.37471	Similar to Zfp26: Zinc finger protein 26 (Mus musculus OX%3D10090)	zf-C2H2
ANN02924	Chr3	230191	241461	-	11271	0.25999	0.41115	0.329855	0.255139	Similar to ZUP1: Zinc finger-containing ubiquitin peptidase 1 (Bos taurus OX%3D9913)	zf-C2H2
ANN03050	Chr3	2443152	2443970	-	819	360.67	185.143	394.854	173.075	Similar to Y-box factor homolog (Aplysia californica OX%3D6500)	CSD
ANN03083	Chr3	3098932	3112089	-	13158	0.0765776	0.298754	0.0985275	0.383467	Similar to ZMIZ1: Zinc finger MIZ domain-containing protein 1 (Homo sapiens OX%3D9606)	zf-MIZ
ANN03112	Chr3	3800781	3814911	-	14131	0.0862435	0.985966	0.203822	0.845622	Similar to ZMIZ1: Zinc finger MIZ domain-containing protein 1 (Homo sapiens OX%3D9606)	zf-MIZ
ANN03130	Chr3	4512207	4529306	+	17100	0.0602724	0.1643	0.00568752	0.147435	Similar to lov: Protein jim lovell (Drosophila melanogaster OX%3D7227)	BTB
ANN03139	Chr3	4796387	4799686	+	3300	5.5057	2.89326	5.38487	2.41446	Similar to BTBD7: BTB/POZ domain-containing protein 7 (Homo sapiens OX%3D9606)	BTB
ANN03145	Chr3	4863306	4868047	+	4742	0.894872	0.496502	0.729439	1.32021	Similar to BTBD7: BTB/POZ domain-containing protein 7 (Homo sapiens OX%3D9606)	BTB
ANN03157	Chr3	5079366	5083637	-	4272	1.73411	0.920067	1.0772	0.349121	Similar to rcor2: REST corepressor 2 (Danio rerio OX%3D7955)	Myb_DNA-binding
ANN03184	Chr3	5610330	5628609	+	18280	9.0751	6.42098	8.73918	6.35408	Similar to ZUP1: Zinc finger-containing ubiquitin peptidase 1 (Bos taurus OX%3D9913)	zf-C2H2
ANN03221	Chr3	6670188	6689433	-	19246	0.954692	0.686472	0.702452	0.467227	Similar to pol: RNA-directed DNA polymerase from mobile element jockey (Drosophila melanogaster OX%3D7227)	zf-C2H2
ANN03234	Chr3	6979198	6989294	-	10097	0.0301611	0.142251	0.095058	0.176926	Similar to ZNF384: Zinc finger protein 384 (Homo sapiens OX%3D9606)	zf-H2C2_2
ANN03252	Chr3	7661135	7663144	+	2010	0.131155	0.246718	0.151158	0.13273	Similar to Ogfr: Opioid growth factor receptor (Mus musculus OX%3D10090)	HTH_psq
ANN03312	Chr3	8689817	8706520	+	16704	0.391577	0.348266	0.244302	0.249845	Similar to RTase: Probable RNA-directed DNA polymerase from transposon BS (Drosophila melanogaster OX%3D7227)	DM
ANN03370	Chr3	9969421	9971407	+	1987	0	0.305583	0.308845	0.449708	Similar to JRKL: Jerky protein homolog-like (Homo sapiens OX%3D9606)	HTH_psq
ANN03387	Chr3	10316316	10328620	-	12305	0.0295425	0.0758101	0.0431266	0.0686621	Similar to Hey: Hairy/enhancer-of-split related with YRPW motif protein (Drosophila melanogaster OX%3D7227)	HLH
ANN03409	Chr3	10653710	10661946	+	8237	26.8913	13.3418	22.4121	12.1252	Similar to ZNF850: Zinc finger protein 850 (Homo sapiens OX%3D9606)	zf-C2H2
ANN03410	Chr3	10662172	10663428	+	1257	25.8333	9.68469	24.9816	8.16469	Similar to Zfp26: Zinc finger protein 26 (Mus musculus OX%3D10090)	zf-C2H2
ANN03412	Chr3	10691347	10709370	+	18024	13.5946	3.95072	11.6854	3.36066	Similar to ZNF91: Zinc finger protein 91 (Homo sapiens OX%3D9606)	zf-H2C2_2
ANN03413	Chr3	10718436	10719195	+	760	15.756	7.76232	16.3494	6.45162	Similar to Zfp26: Zinc finger protein 26 (Mus musculus OX%3D10090)	zf-H2C2_2
ANN03414	Chr3	10721258	10743072	+	21815	14.5126	2.95883	12.4502	2.19608	Similar to ZNF208: Zinc finger protein 208 (Homo sapiens OX%3D9606)	zf-C2H2
ANN03422	Chr3	10930420	10941121	+	10702	2.02592	1.18211	2.39964	0.935535	Similar to ZNF324B: Zinc finger protein 324B (Homo sapiens OX%3D9606)	zf-C2H2
ANN03447	Chr3	11491072	11496177	-	5106	19.1333	25.9803	18.1517	23.7652	Similar to Znf629: Zinc finger protein 629 (Mus musculus OX%3D10090)	zf-C2H2
ANN03479	Chr3	12255658	12268768	+	13111	31.6064	52.9138	28.0711	76.3496	Similar to ZNF668: Zinc finger protein 668 (Bos taurus OX%3D9913)	zf-H2C2_2
ANN03492	Chr3	12639807	12643366	-	3560	0.80335	0.340111	0.579557	0.543815	Similar to Rfx2: DNA-binding protein RFX2 (Rattus norvegicus OX%3D10116)	RFX_DNA_binding
ANN03524	Chr3	14056899	14061361	+	4463	0.265257	0.0282223	0.211558	0.0797555	Similar to Nr2e1: Nuclear receptor subfamily 2 group E member 1 (Mus musculus OX%3D10090)	Retinoid_X_Receptor-like
ANN03546	Chr3	14571531	14594931	+	23401	0.011273	0.0707061	0.021087	0.0351608	Similar to gsb-n: Protein gooseberry-neuro (Drosophila melanogaster OX%3D7227)	PAX
ANN03592	Chr3	16164856	16181760	+	16905	0.127622	0.344313	0.0515298	0.514309	Similar to ato: Protein atonal (Drosophila melanogaster OX%3D7227)	HLH
ANN03594	Chr3	16332420	16345604	-	13185	3.39383	2.98893	3.94841	2.51204	Similar to wdn: Serendipity locus protein H-1 (Drosophila melanogaster OX%3D7227)	zf-H2C2_2
ANN03685	Chr3	18996252	19034438	-	38187	12.8617	3.76171	11.1941	3.0844	Similar to stc: Protein shuttle craft (Drosophila melanogaster OX%3D7227)	zf-NF-X1
ANN03686	Chr3	19038978	19046200	+	7223	0.0892624	0.975121	0.0914335	1.40012	Similar to arx: Aristaless-related homeobox protein (Danio rerio OX%3D7955)	Homeodomain
ANN03750	Chr3	20742410	20760713	+	18304	10.6564	5.63225	10.4348	5.50091	Similar to znf346: Zinc finger protein 346 (Danio rerio OX%3D7955)	zf-C2H2
ANN03759	Chr3	21051198	21063979	+	12782	0.369115	0.475181	0.0988484	0.386526	Similar to sob: Protein sister of odd and bowel (Drosophila melanogaster OX%3D7227)	zf-C2H2
ANN03760	Chr3	21137199	21156039	-	18841	0.309836	3.36581	0.320156	4.41294	Similar to drm: Protein drumstick (Anopheles gambiae OX%3D7165)	zf-C2H2
ANN03778	Chr3	21788636	21815755	+	27120	0.976273	0.63587	0.903064	0.541685	Similar to KAT6A: Histone acetyltransferase KAT6A (Homo sapiens OX%3D9606)	MOZ_SAS
ANN03802	Chr3	22212301	22218616	+	6316	11.9273	9.18643	9.01009	4.057	Similar to cwo: Transcription factor cwo (Drosophila melanogaster OX%3D7227)	HLH
ANN03814	Chr3	22705878	22720702	-	14825	1.82857	1.66958	1.63278	1.18449	Similar to ZNF658: Zinc finger protein 658 (Homo sapiens OX%3D9606)	zf-C2H2
ANN03897	Chr3	25547610	25560081	-	12472	0.00941185	0.224682	0.0155963	0.242191	Similar to LTA4H: Leukotriene A-4 hydrolase (Cavia porcellus OX%3D10141)	Homeodomain
ANN03900	Chr3	25700803	25718749	-	17947	0.235707	0.713629	0.510499	0.723076	Similar to Satb1: DNA-binding protein SATB1 (Mus musculus OX%3D10090)	Homeodomain
ANN03910	Chr3	25921240	25934848	-	13609	11.8013	9.16689	12.6732	8.98773	Similar to CERS6: Ceramide synthase 6 (Homo sapiens OX%3D9606)	TRAM_LAG1_CLN8
ANN03911	Chr3	25952910	25957425	-	4516	2.09721	14.717	2.59104	13.9075	Similar to ken: Probable transcription factor Ken (Fragment) (Drosophila yakuba OX%3D7245)	BTB
ANN03914	Chr3	26026105	26028169	+	2065	0	0	0	0.338576	Similar to TIGD1: Tigger transposable element-derived protein 1 (Homo sapiens OX%3D9606)	HTH_psq
ANN03991	Chr3	27758322	27774407	+	16086	0.077977	0.313603	0.107371	0.299549	Similar to Klhl17: Kelch-like protein 17 (Rattus norvegicus OX%3D10116)	BTB
ANN04000	Chr3	28055024	28056775	-	1752	0.220753	11.9942	0.460398	9.9697	Similar to ZNF358: Zinc finger protein 358 (Homo sapiens OX%3D9606)	zf-C2H2
ANN04001	Chr3	28065573	28066558	-	986	0.285424	2.94534	0.719254	2.80648	Similar to ZNF235: Zinc finger protein 235 (Homo sapiens OX%3D9606)	zf-C2H2
ANN04003	Chr3	28084200	28084719	-	520	0	0.142628	0.0936907	0.412548	Similar to ttk: Protein tramtrack%2C beta isoform (Drosophila melanogaster OX%3D7227)	BTB
ANN04006	Chr3	28238170	28242987	-	4818	0.0960351	1.40987	0.15638	0.821279	Similar to ttk: Protein tramtrack%2C alpha isoform (Drosophila melanogaster OX%3D7227)	BTB
ANN04020	Chr3	28747726	28749016	+	1291	7.89403	6.60352	8.41515	2.32122	Similar to E(spl)mgamma-HLH: Enhancer of split mgamma protein (Drosophila melanogaster OX%3D7227)	HLH
ANN04088	Chr3	30550261	30564929	-	14669	2.19079	0.331905	1.85065	0.325938	Similar to pol: Retrovirus-related Pol polyprotein from transposon 297 (Drosophila melanogaster OX%3D7227)	BTB
ANN04100	Chr3	31080951	31093207	-	12257	1.83657	2.34435	2.16995	2.05989	Similar to RERE: Arginine-glutamic acid dipeptide repeats protein (Homo sapiens OX%3D9606)	GATA
ANN04109	Chr3	31288493	31292768	-	4276	7.51266	7.50836	9.26236	5.63548	Similar to ZNF182: Zinc finger protein 182 (Homo sapiens OX%3D9606)	zf-H2C2_2
ANN04114	Chr3	31417848	31421777	+	3930	12.3849	5.38297	6.65147	2.56821	Similar to Tfam: Transcription factor A%2C mitochondrial (Rattus norvegicus OX%3D10116)	HMG_box
ANN04123	Chr3	31685931	31693921	-	7991	2.31273	1.12087	4.64194	3.17185	Similar to Tfam: Transcription factor A%2C mitochondrial (Rattus norvegicus OX%3D10116)	HMG_box
ANN04167	Chr3	33363762	33368813	+	5052	1.28783	15.3007	1.73546	12.1317	Similar to elB: Zinc finger protein Elbow (Drosophila melanogaster OX%3D7227)	zf-C2H2
ANN04179	Chr3	33923026	33941208	-	18183	0.0122523	0.277256	0.0592611	0.20991	Similar to grn: GATA-binding factor C (Drosophila melanogaster OX%3D7227)	GATA
ANN04298	Chr3	38185966	38199284	-	13319	39.415	32.3097	47.7145	32.0521	Similar to tram1l1: Translocating chain-associated membrane protein 1-like 1 (Xenopus laevis OX%3D8355)	TRAM_LAG1_CLN8
ANN04330	Chr3	39095294	39109135	-	13842	4.57339	8.12643	4.48168	7.17689	Similar to spopl: Speckle-type POZ protein-like (Xenopus laevis OX%3D8355)	BTB
ANN04458	Chr3	42634820	42637804	-	2985	16.5812	4.47397	15.5142	3.16915	Similar to Foxn4: Forkhead box protein N4 (Mus musculus OX%3D10090)	Forkhead
ANN04478	Chr3	43231815	43233969	+	2155	29.4815	11.9986	31.0963	12.2936	Similar to Hr39: Nuclear hormone receptor FTZ-F1 beta (Drosophila melanogaster OX%3D7227)	Steroidogenic_Factor-like
ANN04512	Chr3	43814198	43824570	-	10373	0.0694543	0.0214107	0.132333	0.0662306	Similar to Pax7: Paired box protein Pax-7 (Mus musculus OX%3D10090)	Homeodomain
ANN04527	Chr3	44053254	44054103	+	850	109.285	20.407	89.8895	25.5048	Similar to GTF3A: Transcription factor IIIA (Homo sapiens OX%3D9606)	zf-C2H2
ANN04608	Chr3	45639115	45643269	+	4155	1.75265	3.05083	2.6824	3.33899	Similar to Znf583: Zinc finger protein 583 (Mus musculus OX%3D10090)	zf-H2C2_2
ANN04700	Chr3	47679534	47693236	+	13703	0.264639	0.241934	0.225064	0.0987653	Similar to ham: Transcription factor hamlet (Drosophila melanogaster OX%3D7227)	zf-C2H2
ANN04714	Chr3	48196091	48215062	+	18972	1.4142	1.70221	1.69418	1.53518	Similar to Hivep1: Zinc finger protein 40 (Mus musculus OX%3D10090)	zf-C2H2
ANN04755	Chr3	50046988	50048011	+	1024	0	1.55585	0.0950645	1.33305	Similar to Runx1: Runt-related transcription factor 1 (Rattus norvegicus OX%3D10116)	Runt
ANN04760	Chr3	50198129	50201599	-	3471	0.151953	2.00586	0.149483	2.08807	Similar to run: Segmentation protein Runt (Drosophila melanogaster OX%3D7227)	Runt
ANN04761	Chr3	50246718	50264897	+	18180	0.0489999	0.376841	0.0722386	0.236405	Similar to RUNX3: Runt-related transcription factor 3 (Homo sapiens OX%3D9606)	Runt
ANN04765	Chr3	50409983	50420770	-	10788	0.053211	0.659226	0.0869119	0.260383	Similar to Runx1: Runt-related transcription factor 1 (Rattus norvegicus OX%3D10116)	Runt
ANN04777	Chr3	50596377	50609895	+	13519	1.82185	1.89499	2.53314	2.12086	Similar to BTBD9: BTB/POZ domain-containing protein 9 (Bos taurus OX%3D9913)	BTB
ANN04803	Chr3	51631821	51640310	-	8490	2.67742	1.43454	3.37406	1.60133	Similar to Zfp26: Zinc finger protein 26 (Mus musculus OX%3D10090)	zf-C2H2
ANN04848	Chr3	52646504	52657706	-	11203	0.179391	0.118248	0.314726	0.178883	Similar to Pax7: Paired box protein Pax-7 (Mus musculus OX%3D10090)	Homeodomain
ANN05001	Chr2	2827683	2829639	+	1957	0.107767	0.0945114	0	0	Similar to TIGD1: Tigger transposable element-derived protein 1 (Homo sapiens OX%3D9606)	HTH_psq
ANN05010	Chr2	3013767	3022028	-	8262	2.77643	1.34185	2.49774	1.54008	Similar to ZNF782: Zinc finger protein 782 (Homo sapiens OX%3D9606)	zf-H2C2_2
ANN05035	Chr2	3555591	3579120	-	23530	0.0211622	0.0400999	0.0596643	0.0887872	Similar to Transposable element Tcb2 transposase (Caenorhabditis briggsae OX%3D6238)	PAX
ANN05166	Chr2	6924550	6926646	+	2097	89.411	66.5869	79.8451	48.1306	Similar to MLX: Max-like protein X (Homo sapiens OX%3D9606)	HLH
ANN05175	Chr2	7068041	7088935	-	20895	1.7861	1.51573	1.90175	1.53909	Similar to dbo: Kelch-like protein diablo (Culex quinquefasciatus OX%3D7176)	BTB
ANN05192	Chr2	7326416	7333663	-	7248	3.89194	2.22841	4.70365	1.74008	Similar to Thap12: 52 kDa repressor of the inhibitor of the protein kinase (Mus musculus OX%3D10090)	THAP
ANN05222	Chr2	8525536	8536892	+	11357	2.75996	0.51035	3.52247	0.189134	Similar to Six4: Homeobox protein SIX4 (Mus musculus OX%3D10090)	Homeodomain
ANN05225	Chr2	8552102	8555264	+	3163	13.9573	9.46317	15.6132	9.03703	Similar to BAP18: Chromatin complexes subunit BAP18 (Homo sapiens OX%3D9606)	Myb_DNA-binding
ANN05292	Chr2	9863405	9863843	-	439	14.6902	12.4212	12.2681	10.4291	Similar to Rest: RE1-silencing transcription factor (Rattus norvegicus OX%3D10116)	zf-H2C2_2
ANN05293	Chr2	9865902	9867084	-	1183	17.4493	9.05146	15.4163	11.5343	Similar to Rest: RE1-silencing transcription factor (Rattus norvegicus OX%3D10116)	zf-H2C2_2
ANN05294	Chr2	9867109	9868874	-	1766	5.50129	5.98185	5.56266	4.8285	Similar to Rest: RE1-silencing transcription factor (Rattus norvegicus OX%3D10116)	zf-H2C2_2
ANN05295	Chr2	9869789	9870387	-	599	18.7025	14.9984	17.264	14.9506	Similar to rest: RE1-silencing transcription factor (Danio rerio OX%3D7955)	zf-C2H2
ANN05296	Chr2	9872989	9883201	-	10213	17.4563	11.8623	13.9718	10.5105	Similar to Zfp26: Zinc finger protein 26 (Mus musculus OX%3D10090)	zf-H2C2_2
ANN05297	Chr2	9884418	9887945	-	3528	11.4133	13.5455	8.49361	10.5762	Similar to Rest: RE1-silencing transcription factor (Mus musculus OX%3D10090)	zf-H2C2_2
ANN05298	Chr2	9888244	9889227	-	984	15.3979	10.8569	19.1563	11.1436	Similar to rest: RE1-silencing transcription factor (Danio rerio OX%3D7955)	zf-H2C2_2
ANN05299	Chr2	9889955	9890459	-	505	10.7319	10.9248	9.90475	10.0729	Similar to ikzf5: Zinc finger protein Pegasus (Danio rerio OX%3D7955)	zf-H2C2_2
ANN05300	Chr2	9895942	9905161	-	9220	5.7842	4.01166	4.86576	3.1016	Similar to Znf271: Zinc finger protein 271 (Mus musculus OX%3D10090)	zf-H2C2_2
ANN05301	Chr2	9908507	9909058	-	552	8.20032	9.2625	13.4863	8.6546	Similar to ZNF516: Zinc finger protein 516 (Homo sapiens OX%3D9606)	zf-H2C2_2
ANN05302	Chr2	9909830	9912392	-	2563	7.93881	3.73723	7.08211	5.15554	Similar to Transposable element Tcb2 transposase (Caenorhabditis briggsae OX%3D6238)	zf-H2C2_2
ANN05305	Chr2	9926049	9927753	-	1705	14.5481	10.6052	12.8662	7.91528	Similar to ZNF408: Zinc finger protein 408 (Homo sapiens OX%3D9606)	zf-H2C2_2
ANN05306	Chr2	9929376	9930006	-	631	14.6318	17.2416	18.4468	16.5419	Similar to ZNF771: Zinc finger protein 771 (Homo sapiens OX%3D9606)	zf-H2C2_2
ANN05307	Chr2	9930844	9932905	-	2062	23.2916	17.3583	21.1089	15.9401	Similar to Zfp26: Zinc finger protein 26 (Mus musculus OX%3D10090)	zf-H2C2_2
ANN05308	Chr2	9932956	9935726	-	2771	17.3267	13.7635	14.5648	12.7011	Similar to Zfp64: Zinc finger protein 64 (Mus musculus OX%3D10090)	zf-H2C2_2
ANN05310	Chr2	9939511	9946608	-	7098	4.81698	3.86169	4.29899	4.52711	Similar to ikzf5: Zinc finger protein Pegasus (Xenopus tropicalis OX%3D8364)	zf-H2C2_2
ANN05312	Chr2	9958767	9963006	-	4240	8.02561	11.3563	10.3111	9.0077	Similar to Prdm9: Histone-lysine N-methyltransferase PRDM9 (Mus musculus OX%3D10090)	zf-H2C2_2
ANN05313	Chr2	9964188	9964556	-	369	10.795	15.7056	10.5091	6.79126	Similar to Rest: RE1-silencing transcription factor (Mus musculus OX%3D10090)	zf-H2C2_2
ANN05314	Chr2	9965613	9968581	-	2969	10.4574	12.5847	9.91131	10.4526	Similar to Zfp26: Zinc finger protein 26 (Mus musculus OX%3D10090)	zf-H2C2_2
ANN05315	Chr2	9970514	9970971	-	458	34.8665	42.4908	30.8579	30.9317	Similar to rest-b: RE1-silencing transcription factor B (Fragment) (Xenopus laevis OX%3D8355)	zf-H2C2_2
ANN05316	Chr2	9972001	9972458	-	458	19.7111	19.7114	18.0348	16.1499	Similar to ZFY: Zinc finger Y-chromosomal protein (Homo sapiens OX%3D9606)	zf-H2C2_2
ANN05318	Chr2	9989074	9991701	-	2628	13.6289	10.3397	11.3931	10.8636	Similar to Znf271: Zinc finger protein 271 (Mus musculus OX%3D10090)	zf-H2C2_2
ANN05319	Chr2	9994222	9995484	-	1263	22.7369	17.4705	22.1679	20.7306	Similar to Rest: RE1-silencing transcription factor (Rattus norvegicus OX%3D10116)	zf-H2C2_2
ANN05320	Chr2	9995990	9999998	-	4009	11.5046	8.28636	8.73562	6.85724	Similar to Rest: RE1-silencing transcription factor (Rattus norvegicus OX%3D10116)	zf-H2C2_2
ANN05322	Chr2	10005471	10007249	-	1779	22.1309	12.3746	17.9472	8.5872	Similar to mynn: Myoneurin (Danio rerio OX%3D7955)	zf-H2C2_2
ANN05323	Chr2	10008383	10010343	-	1961	21.4872	18.2821	16.7204	14.9853	Similar to ZBTB7A: Zinc finger and BTB domain-containing protein 7A (Gallus gallus OX%3D9031)	zf-H2C2_2
ANN05324	Chr2	10010393	10017824	-	7432	3.21254	3.94527	3.00091	3.25121	Similar to Znf335: Zinc finger protein 335 (Rattus norvegicus OX%3D10116)	zf-H2C2_2
ANN05325	Chr2	10018933	10021630	-	2698	8.06182	9.71809	10.5973	12.4005	Similar to Znf513: Zinc finger protein 513 (Mus musculus OX%3D10090)	zf-H2C2_2
ANN05326	Chr2	10023390	10027910	-	4521	13.7485	12.5734	12.6651	11.0681	Similar to ZFP64: Zinc finger protein 64 (Homo sapiens OX%3D9606)	zf-H2C2_2
ANN05327	Chr2	10028307	10029459	-	1153	14.8176	11.0434	17.4303	15.7947	Similar to MYNN: Myoneurin (Homo sapiens OX%3D9606)	zf-H2C2_2
ANN05328	Chr2	10029690	10031229	-	1540	15.5487	13.9212	16.6934	17.3527	Similar to Rest: RE1-silencing transcription factor (Mus musculus OX%3D10090)	zf-H2C2_2
ANN05329	Chr2	10031409	10032241	-	833	10.1221	9.77764	11.446	7.47052	Similar to ZFY: Zinc finger Y-chromosomal protein (Fragment) (Sus scrofa OX%3D9823)	zf-H2C2_2
ANN05330	Chr2	10032289	10035453	-	3165	8.21026	12.7688	8.39608	9.53756	Similar to Znf711: Zinc finger protein 711 (Mus musculus OX%3D10090)	zf-H2C2_2
ANN05333	Chr2	10041651	10043162	-	1512	4.21593	4.65104	2.5359	1.5469	Similar to SALL3: Sal-like protein 3 (Homo sapiens OX%3D9606)	zf-H2C2_2
ANN05335	Chr2	10049199	10054500	-	5302	20.2133	12.2541	19.4483	11.841	Similar to Zfp26: Zinc finger protein 26 (Mus musculus OX%3D10090)	zf-H2C2_2
ANN05336	Chr2	10057079	10061793	-	4715	17.706	11.257	16.4954	11.4609	Similar to ZFAT: Zinc finger protein ZFAT (Homo sapiens OX%3D9606)	zf-H2C2_2
ANN05337	Chr2	10062269	10071840	-	9572	20.3577	17.133	20.5329	18.2435	Similar to ZNF227: Zinc finger protein 227 (Homo sapiens OX%3D9606)	zf-H2C2_2
ANN05338	Chr2	10104543	10105591	-	1049	8.25079	7.18919	7.22051	5.5049	Similar to lola: Longitudinals lacking protein%2C isoforms A/B/D/L (Drosophila melanogaster OX%3D7227)	zf-C2H2
ANN05339	Chr2	10109133	10111616	-	2484	15.1748	11.1942	12.0228	9.30666	Similar to ZBTB41: Zinc finger and BTB domain-containing protein 41 (Homo sapiens OX%3D9606)	zf-C2H2
ANN05340	Chr2	10142273	10144403	-	2131	10.3188	8.11685	7.16851	6.1273	Similar to rest-a: RE1-silencing transcription factor A (Xenopus laevis OX%3D8355)	zf-H2C2_2
ANN05341	Chr2	10144458	10144791	-	334	8.19845	9.10223	4.69592	11.4434	Similar to ZNF513: Zinc finger protein 513 (Homo sapiens OX%3D9606)	zf-H2C2_2
ANN05372	Chr2	10875636	10881514	-	5879	10.0134	4.37873	10.0856	5.43233	Similar to ZNF846: Zinc finger protein 846 (Homo sapiens OX%3D9606)	zf-C2H2
ANN05432	Chr2	12926982	12950833	-	23852	1.1722	0.869298	1.08251	1.00819	Similar to mybL: Myb-like protein L (Dictyostelium discoideum OX%3D44689)	Myb_DNA-binding
ANN05511	Chr2	15602705	15615631	+	12927	0.824031	0.949641	1.21327	0.537272	Similar to kel: Ring canal kelch homolog (Anopheles stephensi OX%3D30069)	BTB
ANN05584	Chr2	17617370	17623032	-	5663	0.0889469	0	0.193927	0.145569	Similar to Transposable element Tcb2 transposase (Caenorhabditis briggsae OX%3D6238)	PAX
ANN05595	Chr2	17844847	17852111	+	7265	0.558211	1.35478	0.586456	1.01627	Similar to lhx3: LIM/homeobox protein Lhx3 (Danio rerio OX%3D7955)	Homeodomain
ANN05597	Chr2	17859901	17879679	+	19779	0.49201	0.414295	0.732659	0.403926	Similar to btbd6b: BTB/POZ domain-containing protein 6-B (Danio rerio OX%3D7955)	BTB
ANN05604	Chr2	18034512	18037684	+	3173	0.513652	0.697736	0.192012	1.00243	Similar to lhx3: LIM/homeobox protein Lhx3 (Danio rerio OX%3D7955)	Homeodomain
ANN05639	Chr2	19571548	19589886	-	18339	1.82571	2.03762	2.54636	2.8933	Similar to ARMC8: Armadillo repeat-containing protein 8 (Homo sapiens OX%3D9606)	THAP
ANN05665	Chr2	20323249	20328116	-	4868	0.0457718	1.57194	0.1077	1.39189	Similar to esg: Protein escargot (Drosophila melanogaster OX%3D7227)	zf-C2H2
ANN05668	Chr2	20478770	20487147	-	8378	11.445	7.20328	14.5419	9.33653	Similar to Klhl18: Kelch-like protein 18 (Mus musculus OX%3D10090)	BTB
ANN05713	Chr2	21501052	21512851	+	11800	12.2046	16.5211	13.0877	13.7088	Similar to brm: ATP-dependent helicase brm (Drosophila melanogaster OX%3D7227)	SNF2-rel_dom
ANN05731	Chr2	21848835	21850631	-	1797	0	0	0	0.23857	Similar to JRKL: Jerky protein homolog-like (Homo sapiens OX%3D9606)	HTH_psq
ANN05942	Chr2	27759500	27762921	+	3422	0	0	0.0284276	0	Similar to KLF15: Krueppel-like factor 15 (Homo sapiens OX%3D9606)	zf-C2H2
ANN05944	Chr2	27802395	27802731	-	337	0.139456	4.44992	0	3.06158	Similar to otx5-b: Homeobox protein otx5-B (Xenopus laevis OX%3D8355)	Homeodomain
ANN05947	Chr2	27872008	27874467	-	2460	0.088219	0.278415	0.0856966	0.357362	Similar to otx5-b: Homeobox protein otx5-B (Xenopus laevis OX%3D8355)	Homeodomain
ANN05954	Chr2	28063691	28065744	+	2054	0.0256688	0.169508	0	0.197841	Similar to btbd6: BTB/POZ domain-containing protein 6 (Xenopus laevis OX%3D8355)	BTB
ANN05956	Chr2	28118229	28122627	+	4399	0.122682	0.99312	0.213759	2.44682	Similar to Btbd6: BTB/POZ domain-containing protein 6 (Mus musculus OX%3D10090)	BTB
ANN05990	Chr2	29350823	29353245	+	2423	18.7397	10.7885	16.2145	12.3127	Similar to ZBTB26: Zinc finger and BTB domain-containing protein 26 (Homo sapiens OX%3D9606)	zf-C2H2
ANN05994	Chr2	29441320	29448988	+	7669	0.510711	5.09775	0.314296	2.8023	Similar to bhlhe22: Class E basic helix-loop-helix protein 22 (Xenopus tropicalis OX%3D8364)	HLH
ANN05995	Chr2	29468510	29481435	+	12926	7.14134	9.73906	8.05964	9.59285	Similar to CSRNP3: Cysteine/serine-rich nuclear protein 3 (Homo sapiens OX%3D9606)	CSRNP_N
ANN06098	Chr2	32278108	32300393	-	22286	0.00420526	0.129455	0.0359399	0.0707146	Similar to al: Homeobox protein aristaless (Drosophila melanogaster OX%3D7227)	Homeodomain
ANN06127	Chr2	33240831	33248119	+	7289	2.0547	1.813	2.53271	1.74732	Similar to ush: Zinc finger protein ush (Drosophila melanogaster OX%3D7227)	zf-C2H2
ANN06202	Chr2	36130704	36141648	-	10945	3.83043	4.78746	3.16319	3.96651	Similar to SP4: Transcription factor Sp4 (Homo sapiens OX%3D9606)	zf-H2C2_2
ANN06207	Chr2	36274480	36281563	+	7084	0.21094	1.15104	0.0937584	0.405473	Similar to gcm: Transcription factor glial cells missing (Drosophila melanogaster OX%3D7227)	GCM
ANN06226	Chr2	36801151	36806152	+	5002	10.2408	10.1511	9.06203	9.13129	Similar to CD109: CD109 antigen (Homo sapiens OX%3D9606)	HLH
ANN06231	Chr2	36899476	36913989	-	14514	0.0492357	0.31926	0.0624804	0.183219	Similar to sox21b: Transcription factor Sox-21-B (Danio rerio OX%3D7955)	HMG_box
ANN06252	Chr2	37522043	37543058	-	21016	4.14338	8.98035	4.5719	8.34837	Similar to CD109: CD109 antigen (Homo sapiens OX%3D9606)	HLH
ANN06271	Chr2	38584168	38588095	+	3928	0.0238641	1.81303	0	0.930169	Similar to sox21b: Transcription factor Sox-21-B (Danio rerio OX%3D7955)	HMG_box
ANN06274	Chr2	38646471	38648541	+	2071	0.25458	0.223608	0.0263706	0.520168	Similar to SETMAR: Histone-lysine N-methyltransferase SETMAR (Homo sapiens OX%3D9606)	HMG_box
ANN06287	Chr2	38945103	38948658	+	3556	1.14713	18.3817	1.67378	15.5376	Similar to Bgb: Protein big brother (Drosophila melanogaster OX%3D7227)	CBF_beta
ANN06326	Chr2	39558334	39569941	-	11608	0.421445	1.22432	0.577743	1.17089	Similar to ab: Protein abrupt (Drosophila melanogaster OX%3D7227)	zf-C2H2
ANN06404	Chr2	41740437	41763817	+	23381	0.0403473	0.508639	0.0656919	0.437659	Similar to ZSCAN5B: Zinc finger and SCAN domain-containing protein 5B (Homo sapiens OX%3D9606)	zf-C2H2
ANN06443	Chr2	43013327	43031792	-	18466	1.25043	0.562824	0.861922	0.276696	Similar to GFI1B: Zinc finger protein Gfi-1b (Gallus gallus OX%3D9031)	zf-H2C2_2
ANN06446	Chr2	43144816	43171093	+	26278	0.0271876	0.096054	0.0121742	0.0245302	Similar to ZNF271: Zinc finger protein 271 (Pongo abelii OX%3D9601)	zf-C2H2
ANN06453	Chr2	43272120	43284545	+	12426	6.50907	1.61727	6.79814	1.54377	Similar to TFDP1: Transcription factor Dp-1 (Bos taurus OX%3D9913)	E2F_TDP
ANN06533	Chr2	44938985	44948649	+	9665	9.06311	2.31814	7.41414	1.62372	Similar to ubtf-b: Nucleolar transcription factor 1-B (Xenopus laevis OX%3D8355)	HMG_box
ANN06590	Chr2	47007101	47024937	-	17837	4.49363	2.93734	3.90937	3.51301	Similar to Btbd9: BTB/POZ domain-containing protein 9 (Mus musculus OX%3D10090)	BTB
ANN06672	Chr2	49568757	49570087	+	1331	10.1866	1.2936	7.1089	0.635388	Similar to POLE4: DNA polymerase epsilon subunit 4 (Homo sapiens OX%3D9606)	NFYC
ANN06691	Chr2	49848732	49850058	+	1327	39.4109	9.58972	34.4702	2.61478	Similar to POLE4: DNA polymerase epsilon subunit 4 (Homo sapiens OX%3D9606)	NFYC
ANN06702	Chr2	50205232	50219967	+	14736	1.50198	0.759984	1.67147	0.834084	Similar to Nfat5: Nuclear factor of activated T-cells 5 (Rattus norvegicus OX%3D10116)	RHD_DNA_bind
ANN06717	Chr2	50778616	50798463	-	19848	0.946544	0.64825	1.03119	0.514257	Similar to Zfp27: Zinc finger protein 27 (Mus musculus OX%3D10090)	zf-H2C2_2
ANN06722	Chr2	50838713	50840114	+	1402	138.773	14.4237	118.615	18.0823	Similar to Btbd9: BTB/POZ domain-containing protein 9 (Mus musculus OX%3D10090)	BTB
ANN06747	Chr2	51326709	51330821	-	4113	1.5032	1.78089	1.72604	1.091	Similar to Kr-h1: Krueppel homolog 1 (Drosophila melanogaster OX%3D7227)	zf-H2C2_2
ANN06762	Chr2	51708050	51712679	+	4630	0.526616	0.325375	0.537462	0.889124	Similar to Kr-h1: Krueppel homolog 1 (Drosophila melanogaster OX%3D7227)	zf-H2C2_2
ANN06808	Chr2	53577984	53579151	+	1168	0	0	0	0	Similar to Transposable element Tcb2 transposase (Caenorhabditis briggsae OX%3D6238)	PAX
ANN06834	Chr2	54277184	54295082	+	17899	1.24729	3.46143	2.00251	4.87364	Similar to Klf10: Krueppel-like factor 10 (Rattus norvegicus OX%3D10116)	zf-C2H2
ANN06842	Chr2	54421760	54429789	-	8030	1.40924	3.97903	1.39215	3.06443	Similar to rxraa: Retinoic acid receptor RXR-alpha-A (Danio rerio OX%3D7955)	Retinoid_X_Receptor-like
ANN06854	Chr2	54577966	54592510	+	14545	0.548322	1.46993	0.470815	1.24059	Similar to RXR: Retinoic acid receptor RXR (Lymnaea stagnalis OX%3D6523)	Retinoid_X_Receptor-like
ANN06873	Chr2	54850642	54850828	+	187	0	0	0	0	Similar to chinmo: Zinc finger protein chinmo (Drosophila melanogaster OX%3D7227)	BTB
ANN06874	Chr2	54862697	54868662	+	5966	0.399855	0.136441	0.348511	0.153048	Similar to chinmo: Zinc finger protein chinmo (Drosophila melanogaster OX%3D7227)	zf-C2H2
ANN06882	Chr2	55001928	55003525	+	1598	0	0	0	0	Similar to chinmo: Zinc finger protein chinmo (Drosophila melanogaster OX%3D7227)	BTB
ANN06883	Chr2	55003803	55018121	+	14319	0.374533	0.235691	0.418435	0.0928571	Similar to chinmo: Zinc finger protein chinmo (Drosophila melanogaster OX%3D7227)	BTB
ANN07063	Chr4	2624058	2634358	-	10301	0.152438	0.017948	0	0.0156864	Similar to Znf112: Zinc finger protein 112 (Mus musculus OX%3D10090)	zf-C2H2
ANN07241	Chr4	7017895	7022679	+	4785	0	0.265407	0.0871975	0.33365	Similar to Transposable element Tcb1 transposase (Caenorhabditis briggsae OX%3D6238)	PAX
ANN07269	Chr4	7713974	7746339	-	32366	0.309171	0.641337	0.552124	0.540834	Similar to HIF1A: Hypoxia-inducible factor 1-alpha (Gallus gallus OX%3D9031)	HLH
ANN07389	Chr4	10616445	10633815	-	17371	0.0896877	2.0605	0.0685076	1.80728	Similar to TRERF1: Transcriptional-regulating factor 1 (Homo sapiens OX%3D9606)	zf-C2H2
ANN07401	Chr4	11244272	11251897	-	7626	17.1276	0.64204	22.2074	0.671523	Similar to TP63: Tumor protein 63 (Homo sapiens OX%3D9606)	P53
ANN07529	Chr4	15009300	15011135	+	1836	1.09218	1.24224	0.238519	0.778704	Similar to ETV1: ETS translocation variant 1 (Homo sapiens OX%3D9606)	Ets
ANN07538	Chr4	15233672	15252052	+	18381	1.23305	0.52513	0.914297	0.616178	Similar to cnc: Segmentation protein cap'n'collar (Drosophila melanogaster OX%3D7227)	TF_bZIP
ANN07558	Chr4	15841602	15844926	-	3325	4.83876	5.44892	5.33138	3.30869	Similar to Transposable element Tcb2 transposase (Caenorhabditis briggsae OX%3D6238)	PAX
ANN07636	Chr4	17277040	17281850	+	4811	6.45667	3.02464	5.2437	3.89377	Similar to EEF2KMT: Protein-lysine N-methyltransferase EEF2KMT (Bos taurus OX%3D9913)	HTH_psq
ANN07647	Chr4	17468082	17468997	-	916	3.0997	5.17756	2.24828	3.09781	Similar to GABPA: GA-binding protein alpha chain (Homo sapiens OX%3D9606)	Ets
ANN07680	Chr4	18118586	18131862	+	13277	3.33026	3.31091	3.34213	4.06376	Similar to ttk: Protein tramtrack%2C beta isoform (Drosophila melanogaster OX%3D7227)	BTB
ANN07730	Chr4	19775062	19782030	-	6969	4.53088	3.95081	5.75106	4.19474	Similar to hmg20a: High mobility group protein 20A (Xenopus tropicalis OX%3D8364)	HMG_box
ANN07754	Chr4	20226361	20238131	+	11771	0.326571	0.749967	0.0447177	0.50761	Similar to not2: Homeobox protein not2 (Xenopus laevis OX%3D8355)	Homeodomain
ANN07762	Chr4	20445635	20458421	+	12787	5.95597	4.46396	6.73115	4.22163	Similar to SMARCC2: SWI/SNF complex subunit SMARCC2 (Homo sapiens OX%3D9606)	Myb_DNA-binding
ANN07789	Chr4	21109127	21150400	+	41274	5.2749	10.125	4.4499	6.30339	Similar to Arid4b: AT-rich interactive domain-containing protein 4B (Mus musculus OX%3D10090)	ARID
ANN07798	Chr4	21322767	21332161	-	9395	15.9714	9.15814	19.2989	8.05194	Similar to HMGXB4: HMG domain-containing protein 4 (Homo sapiens OX%3D9606)	HMG_box
ANN07802	Chr4	21367636	21369619	-	1984	0.0531499	0	0	0.044865	Similar to TIGD1: Tigger transposable element-derived protein 1 (Homo sapiens OX%3D9606)	HTH_psq
ANN07832	Chr4	22151437	22161604	+	10168	0.659432	0.814341	0.79159	0.649428	Similar to Smad4: Mothers against decapentaplegic homolog 4 (Rattus norvegicus OX%3D10116)	MH1
ANN07896	Chr4	23870003	23882753	+	12751	1.97986	4.79814	2.93231	5.39365	Similar to BTBD3: BTB/POZ domain-containing protein 3 (Callithrix jacchus OX%3D9483)	BTB
ANN07929	Chr4	24837884	24857837	+	19954	0.0249474	0.138934	0.044118	0.158379	Similar to NKX6-2: Homeobox protein Nkx-6.2 (Homo sapiens OX%3D9606)	Homeodomain
ANN07945	Chr4	25495460	25517501	-	22042	1.44895	2.7293	1.56189	1.67741	Similar to Zfp27: Zinc finger protein 27 (Mus musculus OX%3D10090)	zf-C2H2
ANN07960	Chr4	25875131	25883807	-	8677	9.99254	23.2266	10.5392	23.3551	Similar to kay: Transcription factor kayak (Drosophila erecta OX%3D7220)	TF_bZIP
ANN07978	Chr4	26638067	26638911	-	845	0	0	0.115226	0.191433	Similar to tc3a: Transposable element Tc3 transposase (Caenorhabditis elegans OX%3D6239)	PAX
ANN07989	Chr4	27178478	27187765	+	9288	0.0535992	0.20564	0.0314152	0.496061	Similar to kn: Transcription factor collier (Drosophila melanogaster OX%3D7227)	Transcription_factor_COE
ANN08022	Chr4	28313781	28315963	-	2183	5.53904	3.39326	5.69569	3.81115	Similar to ZNF239: Zinc finger protein 239 (Homo sapiens OX%3D9606)	zf-C2H2
ANN08023	Chr4	28317317	28320668	-	3352	3.31691	2.09609	4.40324	2.09974	Similar to Zscan21: Zinc finger and SCAN domain-containing protein 21 (Mus musculus OX%3D10090)	zf-C2H2
ANN08024	Chr4	28342736	28347711	-	4976	0.233216	0.660405	0.387541	0.451698	Similar to THAP9: DNA transposase THAP9 (Homo sapiens OX%3D9606)	THAP
ANN08040	Chr4	28856924	28867331	-	10408	3.71325	4.81105	4.58976	5.26991	Similar to Esrra: Steroid hormone receptor ERR1 (Rattus norvegicus OX%3D10116)	Estrogen_Receptor-like
ANN08093	Chr4	30472138	30479603	+	7466	0.632389	4.49263	0.58954	4.51994	Similar to Egr3: Early growth response protein 3 (Mus musculus OX%3D10090)	zf-H2C2_2
ANN08101	Chr4	30706527	30727381	+	20855	0.934868	1.02565	1.29044	0.83578	Similar to MTA1: Metastasis-associated protein MTA1 (Homo sapiens OX%3D9606)	Myb_DNA-binding
ANN08105	Chr4	30769756	30780111	+	10356	3.48548	5.30037	5.10896	5.14938	Similar to Smad3: Mothers against decapentaplegic homolog 3 (Rattus norvegicus OX%3D10116)	MH1
ANN08220	Chr4	35128997	35136503	-	7507	4.29082	2.57054	3.39214	3.18222	Similar to lola: Longitudinals lacking protein%2C isoform G (Drosophila melanogaster OX%3D7227)	BTB
ANN08273	Chr4	36861101	36861893	+	793	4.88294	0	6.55122	0.168343	Similar to ZFP69: Zinc finger protein 69 homolog (Homo sapiens OX%3D9606)	zf-H2C2_2
ANN08274	Chr4	36862794	36866240	+	3447	2.90764	0.193216	4.62715	0.875255	Similar to ZNF569: Zinc finger protein 569 (Homo sapiens OX%3D9606)	zf-C2H2
ANN08275	Chr4	36866953	36868971	+	2019	4.94088	0.212771	6.18153	0.110156	Similar to REST: RE1-silencing transcription factor (Homo sapiens OX%3D9606)	zf-C2H2
ANN08276	Chr4	36869588	36872550	+	2963	0.645236	0.135011	0.625785	0.11462	Similar to ZNF227: Zinc finger protein 227 (Bos taurus OX%3D9913)	zf-C2H2
ANN08277	Chr4	36872782	36875967	+	3186	0.815101	0.380968	0.503552	0.190317	Similar to ZNF184: Zinc finger protein 184 (Homo sapiens OX%3D9606)	zf-C2H2
ANN08317	Chr4	37664030	37665151	-	1122	10.6327	9.66888	9.34331	4.31498	Similar to EGR1: Early growth response protein 1 (Homo sapiens OX%3D9606)	zf-C2H2
ANN08318	Chr4	37665349	37668570	-	3222	6.35857	3.94479	3.2386	2.67118	Similar to Zfp26: Zinc finger protein 26 (Mus musculus OX%3D10090)	zf-C2H2
ANN08319	Chr4	37670204	37672263	-	2060	7.42575	7.49231	4.2506	4.04109	Similar to ZNF235: Zinc finger protein 235 (Homo sapiens OX%3D9606)	zf-C2H2
ANN08320	Chr4	37673325	37674598	-	1274	14.8242	6.08155	8.38429	3.85856	Similar to ZFP62: Zinc finger protein 62 homolog (Homo sapiens OX%3D9606)	zf-C2H2
ANN08321	Chr4	37680247	37681105	-	859	10.3658	0.0733846	12.4278	0.946778	Similar to Znf287: Zinc finger protein 287 (Mus musculus OX%3D10090)	zf-H2C2_2
ANN08322	Chr4	37684960	37688680	-	3721	6.91803	2.27339	5.95394	2.33581	Similar to ZNF595: Zinc finger protein 595 (Homo sapiens OX%3D9606)	zf-C2H2
ANN08323	Chr4	37693157	37697169	-	4013	4.18963	1.33498	3.90023	1.56077	Similar to Znf879: Zinc finger protein 879 (Mus musculus OX%3D10090)	zf-H2C2_2
ANN08324	Chr4	37699553	37701395	-	1843	48.5226	8.78552	41.4168	7.57946	Similar to ZNF235: Zinc finger protein 235 (Homo sapiens OX%3D9606)	zf-C2H2
ANN08325	Chr4	37708408	37716093	-	7686	23.4604	6.75074	13.6347	4.33742	Similar to Zinc finger protein Xfin (Xenopus laevis OX%3D8355)	zf-C2H2
ANN08326	Chr4	37717014	37718331	-	1318	21.5272	14.4494	20.5341	14.6937	Similar to ZNF43: Zinc finger protein 43 (Homo sapiens OX%3D9606)	zf-C2H2
ANN08327	Chr4	37722488	37723847	-	1360	6.81367	2.08595	2.11043	2.65556	Similar to ZNF585A: Zinc finger protein 585A (Homo sapiens OX%3D9606)	zf-C2H2
ANN08328	Chr4	37724532	37727846	-	3315	9.68846	5.73144	4.64705	3.10323	Similar to ZNF91: Zinc finger protein 91 (Homo sapiens OX%3D9606)	zf-C2H2
ANN08329	Chr4	37728920	37730342	-	1423	15.2057	11.4438	15.253	12.5126	Similar to ZNF175: Zinc finger protein 175 (Homo sapiens OX%3D9606)	zf-C2H2
ANN08330	Chr4	37731336	37732699	-	1364	2.82426	1.73484	3.09982	2.95942	Similar to ZNF254: Zinc finger protein 254 (Homo sapiens OX%3D9606)	zf-C2H2
ANN08331	Chr4	37734629	37737523	-	2895	11.8598	6.23709	7.36141	4.30901	Similar to ZNF91: Zinc finger protein 91 (Homo sapiens OX%3D9606)	zf-C2H2
ANN08332	Chr4	37739536	37762158	-	22623	14.9402	7.54508	12.9191	7.02044	Similar to ZNF208: Zinc finger protein 208 (Homo sapiens OX%3D9606)	zf-C2H2
ANN08396	Chr4	39521243	39525425	+	4183	20.4601	10.2324	9.06751	6.16684	Similar to Klhl25: Kelch-like protein 25 (Mus musculus OX%3D10090)	BTB
ANN08398	Chr4	39553106	39555116	+	2011	0.026218	0.0368278	0	0	Similar to TIGD1: Tigger transposable element-derived protein 1 (Homo sapiens OX%3D9606)	HTH_psq
ANN08433	Chr4	40934300	40949579	+	15280	0.110428	3.16218	0.149559	3.52972	Similar to pros: Homeobox protein prospero (Drosophila melanogaster OX%3D7227)	HPD
ANN08617	Chr4	47095813	47106595	+	10783	5.13785	7.40924	5.97996	4.91046	Similar to Ada2b: Transcriptional adapter 2B (Drosophila melanogaster OX%3D7227)	Myb_DNA-binding
ANN08769	Chr5	636310	639942	+	3633	0.0548212	0	0	0.0367091	Similar to LINE-1 retrotransposable element ORF2 protein (Homo sapiens OX%3D9606)	zf-C2H2
ANN08803	Chr5	1327401	1330431	-	3031	0.208705	0.102572	0.0360311	0.102727	Similar to pol: RNA-directed DNA polymerase from mobile element jockey (Drosophila melanogaster OX%3D7227)	zf-C2H2
ANN08896	Chr5	2901877	2911962	+	10086	0.13133	1.07203	0.837369	2.20867	Similar to dpn: Protein deadpan (Drosophila melanogaster OX%3D7227)	HLH
ANN08923	Chr5	3491075	3494180	+	3106	0.109548	0.650636	0.0703215	0.863641	Similar to acj6: Inhibitory POU protein (Drosophila melanogaster OX%3D7227)	Pou
ANN08957	Chr5	4326193	4329844	-	3652	0.0256681	0	0	0	Similar to Pol: LINE-1 retrotransposable element ORF2 protein (Mus musculus OX%3D10090)	zf-C2H2
ANN08974	Chr5	4749556	4762385	-	12830	1.06268	1.32176	1.07439	0.838209	Similar to sip1: Septin-interacting protein 1 (Drosophila melanogaster OX%3D7227)	GCFC
ANN09006	Chr5	5400710	5418225	-	17516	0.0628744	0.382904	0.0272739	0.364218	Similar to Eip78C: Ecdysone-induced protein 78C (Drosophila melanogaster OX%3D7227)	Thyroid_Hormone_Receptor-like
ANN09018	Chr5	5748895	5776174	+	27280	0.0438222	0.52591	0.026487	0.605781	Similar to NR1D2: Nuclear receptor subfamily 1 group D member 2 (Homo sapiens OX%3D9606)	Thyroid_Hormone_Receptor-like
ANN09065	Chr5	6861535	6865931	-	4397	7.01838	2.07278	5.59729	2.40974	Similar to ZNF180: Zinc finger protein 180 (Homo sapiens OX%3D9606)	zf-H2C2_2
ANN09067	Chr5	6876115	6881358	-	5244	2.93858	0.996022	1.76207	0.255847	Similar to ZNF271: Zinc finger protein 271 (Pongo abelii OX%3D9601)	zf-H2C2_2
ANN09070	Chr5	6924361	6933065	-	8705	0.349472	0.118211	0.436554	0.206591	Similar to Zfp26: Zinc finger protein 26 (Mus musculus OX%3D10090)	zf-H2C2_2
ANN09071	Chr5	6951611	6957416	-	5806	0.170573	0.0255035	0.200969	0.0675361	Similar to Zfp26: Zinc finger protein 26 (Mus musculus OX%3D10090)	zf-H2C2_2
ANN09079	Chr5	7209934	7232078	+	22145	0.697084	0.139058	0.807321	0.103987	Similar to ZNF271: Zinc finger protein 271 (Pongo abelii OX%3D9601)	zf-H2C2_2
ANN09084	Chr5	7354040	7366334	-	12295	0.433732	2.29781	0.490861	2.15003	Similar to Tfcp2l1: Transcription factor CP2-like protein 1 (Mus musculus OX%3D10090)	CP2
ANN09166	Chr5	9708785	9712185	+	3401	0	0	0	0	Similar to pol: RNA-directed DNA polymerase from mobile element jockey (Drosophila melanogaster OX%3D7227)	PAX
ANN09190	Chr5	10361563	10386712	-	25150	0.531885	0.5417	0.671916	0.454154	Similar to CSDE1: Cold shock domain-containing protein E1 (Homo sapiens OX%3D9606)	CSD
ANN09192	Chr5	10393003	10395976	-	2974	1.44259	1.72307	1.68616	0.608995	Similar to Csde1: Cold shock domain-containing protein E1 (Mus musculus OX%3D10090)	CSD
ANN09213	Chr5	11247763	11251492	+	3730	1.83519	0.59038	1.90625	0.482734	Similar to ZZZ3: ZZ-type zinc finger-containing protein 3 (Homo sapiens OX%3D9606)	Myb_DNA-binding
ANN09224	Chr5	11377331	11388575	+	11245	0.356515	0.522368	0.418993	0.511657	Similar to Zzz3: ZZ-type zinc finger-containing protein 3 (Mus musculus OX%3D10090)	Myb_DNA-binding
ANN09233	Chr5	11988388	12021544	-	33157	0.268673	0.352072	0.181599	0.282152	Similar to NFXL1: NF-X1-type zinc finger protein NFXL1 (Homo sapiens OX%3D9606)	zf-NF-X1
ANN09242	Chr5	12197233	12222103	-	24871	0.252644	0.263239	0.482893	0.418018	Similar to nfxl1: NF-X1-type zinc finger protein NFXL1 (Xenopus laevis OX%3D8355)	zf-NF-X1
ANN09252	Chr5	12391216	12404244	+	13029	3.91289	3.17315	2.95429	1.54685	Similar to Zfp26: Zinc finger protein 26 (Mus musculus OX%3D10090)	zf-C2H2
ANN09266	Chr5	12764594	12789387	-	24794	1.28712	1.86335	1.45623	1.61994	Similar to BTBD8: BTB/POZ domain-containing protein 8 (Homo sapiens OX%3D9606)	BTB
ANN09269	Chr5	12826171	12839961	+	13791	1.6528	2.10813	1.83489	1.56931	Similar to ZNF260: Zinc finger protein 260 (Homo sapiens OX%3D9606)	zf-C2H2
ANN09277	Chr5	13016231	13023043	-	6813	1.00027	0.212406	2.40326	0.135513	Similar to ZSCAN10: Zinc finger and SCAN domain-containing protein 10 (Homo sapiens OX%3D9606)	zf-C2H2
ANN09291	Chr5	13385331	13389754	-	4424	10.6682	21.4614	15.6629	23.2388	Similar to litaf: Lipopolysaccharide-induced tumor necrosis factor-alpha factor homolog (Xenopus tropicalis OX%3D8364)	zf-LITAF-like
ANN09293	Chr5	13411336	13425072	+	13737	0.748313	1.32509	0.7879	1.14061	Similar to JARID2: Protein Jumonji (Homo sapiens OX%3D9606)	ARID
ANN09383	Chr5	16256006	16260061	-	4056	13.5297	10.1696	17.9513	22.2458	Similar to MRRF: Ribosome-recycling factor%2C mitochondrial (Homo sapiens OX%3D9606)	zf-C2H2
ANN09443	Chr5	17586155	17601440	+	15286	1.98272	1.17043	1.73001	1.34239	Similar to PIAS1: E3 SUMO-protein ligase PIAS1 (Homo sapiens OX%3D9606)	zf-MIZ
ANN09472	Chr5	18120492	18126566	-	6075	0.308759	5.82272	0.188608	8.88929	Similar to Scrt1: Transcriptional repressor scratch 1 (Mus musculus OX%3D10090)	zf-C2H2
ANN09511	Chr5	18985200	18990981	+	5782	0.115576	0.421177	0.213425	0.495421	Similar to ara: Homeobox protein araucan (Drosophila melanogaster OX%3D7227)	Homeodomain
ANN09513	Chr5	19037584	19045214	+	7631	0	0.0630353	0.0270544	0.0503099	Similar to Transposable element Tcb2 transposase (Caenorhabditis briggsae OX%3D6238)	PAX
ANN09515	Chr5	19128810	19135660	+	6851	2.04431	1.6111	2.23884	1.1486	Similar to caup: Homeobox protein caupolican (Drosophila melanogaster OX%3D7227)	Homeodomain
ANN09617	Chr5	22741436	22745345	+	3910	5.95431	7.96607	7.53809	5.6413	Similar to Zfp26: Zinc finger protein 26 (Mus musculus OX%3D10090)	zf-H2C2_2
ANN09619	Chr5	22793599	22809071	-	15473	3.04484	2.112	3.13749	1.49921	Similar to CTCF: Transcriptional repressor CTCF (Gallus gallus OX%3D9031)	zf-H2C2_2
ANN09627	Chr5	23198173	23203368	-	5196	1.88625	2.95898	1.5893	2.56229	Similar to FTZ-F1: Nuclear hormone receptor FTZ-F1 (Bombyx mori OX%3D7091)	Steroidogenic_Factor-like
ANN09630	Chr5	23366283	23380066	+	13784	18.9693	33.9525	17.5889	26.5293	Similar to PAXBP1: PAX3- and PAX7-binding protein 1 (Homo sapiens OX%3D9606)	GCFC
ANN09654	Chr5	24333248	24347136	+	13889	4.17906	2.07543	2.19089	0.591643	Similar to bab1: Protein bric-a-brac 1 (Drosophila melanogaster OX%3D7227)	HTH_psq
ANN09699	Chr5	26047742	26058924	+	11183	1.71335	1.03593	2.11274	0.927538	Similar to bab1: Protein bric-a-brac 1 (Drosophila melanogaster OX%3D7227)	HTH_psq
ANN09733	Chr5	26882459	26909819	-	27361	0.392776	0.542247	0.341553	0.306906	Similar to Arntl: Aryl hydrocarbon receptor nuclear translocator-like protein 1 (Nannospalax galili OX%3D1026970)	HLH
ANN09752	Chr5	27600857	27627040	+	26184	0.0890773	0.162136	0.299796	0.370602	Similar to Arntl: Aryl hydrocarbon receptor nuclear translocator-like protein 1 (Nannospalax galili OX%3D1026970)	HLH
ANN09821	Chr5	28881913	28894954	+	13042	1.04404	0.591768	1.62743	0.549958	Similar to GLIS3: Zinc finger protein GLIS3 (Homo sapiens OX%3D9606)	zf-H2C2_2
ANN09838	Chr5	29173381	29190535	+	17155	1.13278	0.990035	1.14301	0.910343	Similar to Lmx1b: LIM homeobox transcription factor 1-beta (Mus musculus OX%3D10090)	Homeodomain
ANN09845	Chr5	29298590	29308903	+	10314	0.0602433	0.284874	0.0423443	0.258987	Similar to LMX1B: LIM homeobox transcription factor 1-beta (Homo sapiens OX%3D9606)	Homeodomain
ANN09848	Chr5	29379788	29389604	+	9817	0	0.10482	0	0.153597	Similar to LMX1B: LIM homeobox transcription factor 1-beta (Homo sapiens OX%3D9606)	Homeodomain
ANN09870	Chr5	30032036	30040325	-	8290	1.48889	1.17527	1.5234	0.713457	Similar to F13E9.13: Uncharacterized protein F13E9.13%2C mitochondrial (Caenorhabditis elegans OX%3D6239)	zf-C2H2
ANN09877	Chr5	30159782	30163415	-	3634	9.72669	8.96868	11.0032	7.4456	Similar to ZNF429: Zinc finger protein 429 (Homo sapiens OX%3D9606)	zf-C2H2
ANN09964	Chr5	32746775	32755792	-	9018	0.0520004	1.01676	0.0336782	1.05532	Similar to Ets65A: DNA-binding protein D-ETS-3 (Drosophila melanogaster OX%3D7227)	Ets
ANN09965	Chr5	32839303	32841847	-	2545	0.22139	0.0290974	0.128937	0.121469	Similar to fezf2: Fez family zinc finger protein 2 (Xenopus tropicalis OX%3D8364)	zf-C2H2
ANN09984	Chr5	33202333	33211156	-	8824	0.00597281	0.0629019	0	0.116983	Similar to Ttll6: Tubulin polyglutamylase TTLL6 (Mus musculus OX%3D10090)	Forkhead
ANN10111	Chr5	36434650	36441801	+	7152	1.63205	1.06613	1.89144	1.14431	Similar to HINFP: Histone H4 transcription factor (Bos taurus OX%3D9913)	zf-C2H2
ANN10186	Chr5	38138549	38147195	-	8647	3.5018	2.42649	3.06514	2.04077	Similar to DNAJC1: DnaJ homolog subfamily C member 1 (Homo sapiens OX%3D9606)	Myb_DNA-binding
ANN10197	Chr5	38602088	38608749	+	6662	2.92035	4.18572	2.49956	2.85971	Similar to LITAF: Lipopolysaccharide-induced tumor necrosis factor-alpha factor homolog (Gallus gallus OX%3D9031)	zf-LITAF-like
ANN10311	Chr5	42591571	42596268	-	4698	1.88807	1.06787	2.18831	0.865642	Similar to ZNF681: Zinc finger protein 681 (Homo sapiens OX%3D9606)	zf-C2H2
ANN10355	Chr5	43565184	43568397	-	3214	0.0656061	12.6241	0.170048	10.6866	Similar to Scrt1: Transcriptional repressor scratch 1 (Mus musculus OX%3D10090)	zf-C2H2
ANN10359	Chr5	43725467	43732835	-	7369	11.1593	12.4621	9.06839	13.5012	Similar to Deaf1: Deformed epidermal autoregulatory factor 1 (Drosophila melanogaster OX%3D7227)	SAND
ANN10378	Chr5	44323265	44328341	+	5077	2.72306	4.68686	3.29373	4.59039	Similar to ttk: Protein tramtrack%2C beta isoform (Drosophila melanogaster OX%3D7227)	BTB
ANN10392	Chr5	44738258	44752619	+	14362	8.39643	1.66703	6.92551	1.35236	Similar to BTBD9: BTB/POZ domain-containing protein 9 (Drosophila melanogaster OX%3D7227)	BTB
ANN10406	Chr5	45102344	45105444	+	3101	64.3528	325.264	57.2468	295.464	Similar to Transposable element Tcb2 transposase (Caenorhabditis briggsae OX%3D6238)	PAX
ANN10434	Chr5	45703345	45704026	+	682	20.1846	7.24226	27.5615	5.83835	Similar to BTBD9: BTB/POZ domain-containing protein 9 (Drosophila melanogaster OX%3D7227)	BTB
ANN10507	Chr6	903437	922257	+	18821	0.0124735	0.0833585	0.00580096	0.0328393	Similar to Phox2b: Paired mesoderm homeobox protein 2B (Mus musculus OX%3D10090)	Homeodomain
ANN10522	Chr6	1243233	1243722	-	490	0.431068	40.9414	0.455319	44.8972	Similar to ZNF735: Putative zinc finger protein 735 (Homo sapiens OX%3D9606)	zf-C2H2
ANN10540	Chr6	2000268	2007085	+	6818	9.92876	4.06424	9.26034	2.89491	Similar to KAT8: Histone acetyltransferase KAT8 (Homo sapiens OX%3D9606)	MOZ_SAS
ANN10556	Chr6	2242980	2249714	+	6735	2.19958	0.985251	1.50133	0.771453	Similar to Kat8: Histone acetyltransferase KAT8 (Rattus norvegicus OX%3D10116)	MOZ_SAS
ANN10607	Chr6	3695197	3699403	+	4207	1.34975	0.943132	1.14681	0.280512	Similar to Arid2: AT-rich interactive domain-containing protein 2 (Mus musculus OX%3D10090)	ARID
ANN10609	Chr6	3736207	3772979	+	36773	1.06938	0.765219	1.22016	0.621329	Similar to ARID2: AT-rich interactive domain-containing protein 2 (Homo sapiens OX%3D9606)	RFX_DNA_binding
ANN10637	Chr6	4335946	4337488	-	1543	23.5717	7.52286	19.1489	5.90138	Similar to BTBD9: BTB/POZ domain-containing protein 9 (Drosophila melanogaster OX%3D7227)	BTB
ANN10659	Chr6	4692568	4701132	-	8565	6.88824	0.366834	7.4262	0.18404	Similar to Prdm9: Histone-lysine N-methyltransferase PRDM9 (Mus musculus OX%3D10090)	zf-C2H2
ANN10716	Chr6	6102680	6118282	+	15603	1.95155	1.41121	2.47464	1.10857	Similar to Dsp1: High mobility group protein DSP1 (Drosophila melanogaster OX%3D7227)	HMG_box
ANN10717	Chr6	6126914	6133477	+	6564	25.3164	18.3243	30.4105	18.908	Similar to Dsp1: High mobility group protein DSP1 (Drosophila melanogaster OX%3D7227)	HMG_box
ANN10745	Chr6	6446532	6467992	+	21461	0.481526	0.989124	0.630755	0.724834	Similar to Lztr1: Leucine-zipper-like transcriptional regulator 1 homolog (Drosophila melanogaster OX%3D7227)	BTB
ANN10831	Chr6	8351680	8365772	-	14093	0.145129	0.241337	0.170673	0.292379	Similar to Tead1: Transcriptional enhancer factor TEF-1 (Mus musculus OX%3D10090)	TEA
ANN10848	Chr6	8776209	8786276	+	10068	5.85794	0.213264	5.20981	0.240404	Similar to GCNA: Acidic repeat-containing protein (Homo sapiens OX%3D9606)	HMG_box
ANN10852	Chr6	8994266	9003087	-	8822	3.68365	2.36333	3.0461	2.30799	Similar to THAP12: 52 kDa repressor of the inhibitor of the protein kinase (Homo sapiens OX%3D9606)	THAP
ANN10947	Chr6	11273264	11275221	+	1958	20.9567	27.5143	22.7948	18.7583	Similar to NFYB: Nuclear transcription factor Y subunit beta (Petromyzon marinus OX%3D7757)	NFYB
ANN11054	Chr6	14444068	14465946	+	21879	3.24115	2.19304	4.52176	2.43613	Similar to Cdc5l: Cell division cycle 5-like protein (Rattus norvegicus OX%3D10116)	Myb_DNA-binding
ANN11162	Chr6	18017744	18034636	-	16893	2.38504	2.19595	3.23494	1.91734	Similar to Smarce1: SWI/SNF-related matrix-associated actin-dependent regulator of chromatin subfamily E member 1 (Rattus norvegicus OX%3D10116)	HMG_box
ANN11177	Chr6	18287362	18294035	+	6674	10.1585	2.41088	9.12767	1.77595	Similar to ZNF888: Zinc finger protein 888 (Homo sapiens OX%3D9606)	zf-C2H2
ANN11190	Chr6	18728157	18733874	-	5718	0.974227	0.672002	0.474363	0.47777	Similar to ZNF771: Zinc finger protein 771 (Homo sapiens OX%3D9606)	zf-C2H2
ANN11191	Chr6	18737271	18742645	-	5375	2.49165	2.67965	3.11047	1.66028	Similar to ZNF473: Zinc finger protein 473 (Homo sapiens OX%3D9606)	zf-H2C2_2
ANN11195	Chr6	18778202	18778956	-	755	7.65518	2.27732	7.25211	1.90459	Similar to l(1)sc: Achaete-scute complex protein T3 (Drosophila melanogaster OX%3D7227)	HLH
ANN11197	Chr6	18926774	18933608	+	6835	7.43553	10.848	8.80401	14.0691	Similar to aop: Ets DNA-binding protein pokkuri (Drosophila melanogaster OX%3D7227)	Ets
ANN11203	Chr6	19016274	19018572	-	2299	0.063713	0.362313	0.0721987	0.646915	Similar to Ptx1: Pituitary homeobox homolog Ptx1 (Drosophila melanogaster OX%3D7227)	Homeodomain
ANN11283	Chr6	21839808	21857589	+	17782	0.170093	0.455591	0.152557	0.211535	Similar to Nr2e1: Nuclear receptor subfamily 2 group E member 1 (Mus musculus OX%3D10090)	Retinoid_X_Receptor-like
ANN11310	Chr6	22493489	22504911	-	11423	0.681212	0.263024	0.932404	0.247488	Similar to CrebA: Cyclic AMP response element-binding protein A (Drosophila melanogaster OX%3D7227)	TF_bZIP
ANN11311	Chr6	22589970	22602043	-	12074	3.60944	2.535	3.96098	2.18927	Similar to GLI4: Zinc finger protein GLI4 (Homo sapiens OX%3D9606)	zf-C2H2
ANN11322	Chr6	22818110	22825462	+	7353	0.349226	0.246579	0.504565	0.230017	Similar to hand2: Heart- and neural crest derivatives-expressed protein 2 (Danio rerio OX%3D7955)	HLH
ANN11336	Chr6	23074469	23081147	+	6679	0.572267	0.214445	0.511956	0.482054	Similar to hand2: Heart- and neural crest derivatives-expressed protein 2 (Danio rerio OX%3D7955)	HLH
ANN11440	Chr6	25551147	25559715	-	8569	0.835699	1.42191	1.03877	1.08948	Similar to foxo: Forkhead box protein O (Drosophila grimshawi OX%3D7222)	Forkhead
ANN11475	Chr6	26320975	26340844	+	19870	0.219936	0.254447	0.182984	0.32718	Similar to foxo: Forkhead box protein O (Drosophila grimshawi OX%3D7222)	Forkhead
ANN11478	Chr6	26477275	26480724	-	3450	0	0	0	0.154771	Similar to Tlcd5: TLC domain-containing protein 5 (Mus musculus OX%3D10090)	TRAM_LAG1_CLN8
ANN11545	Chr6	28220250	28227365	+	7116	0.0164969	0.578247	0.0227832	0.425657	Similar to Pax6: Paired box protein Pax-6 (Rattus norvegicus OX%3D10116)	PAX
ANN11546	Chr6	28249667	28262686	+	13020	0.0436511	0.859711	0.0678565	0.597808	Similar to PAX6: Paired box protein Pax-6 (Coturnix japonica OX%3D93934)	Homeodomain
ANN11559	Chr6	28821555	28838391	-	16837	1.40709	1.36495	2.00475	1.15394	Similar to ZBED1: Zinc finger BED domain-containing protein 1 (Homo sapiens OX%3D9606)	zf-BED
ANN11564	Chr6	28933791	28935439	-	1649	1.77806	2.10206	1.41002	1.10208	Similar to Kr: Protein krueppel (Drosophila melanogaster OX%3D7227)	zf-H2C2_2
ANN11577	Chr6	29508719	29538876	+	30158	0.135431	1.00978	0.125699	0.579041	Similar to pan: Protein pangolin%2C isoform J (Drosophila melanogaster OX%3D7227)	HMG_box
ANN11578	Chr6	29553723	29577202	+	23480	0.743648	0.712619	1.03673	0.698334	Similar to lola: Longitudinals lacking protein%2C isoforms A/B/D/L (Drosophila melanogaster OX%3D7227)	BTB
ANN11709	Chr6	33260741	33276684	-	15944	1.32024	1.05014	1.34154	0.881457	Similar to gcl: Protein germ cell-less (Drosophila melanogaster OX%3D7227)	BTB
ANN11728	Chr6	33673718	33679029	+	5312	0.0915575	3.31807	0.0183112	2.97269	Similar to PAX6: Paired box protein Pax-6 (Fragment) (Gallus gallus OX%3D9031)	Homeodomain
ANN11767	Chr6	34887493	34905558	+	18066	0.0609859	0.12969	0.0571369	0.115753	Similar to Nfya: Nuclear transcription factor Y subunit alpha (Mus musculus OX%3D10090)	CBFB_NFYA
ANN11778	Chr6	35168441	35185265	+	16825	0.514734	0.568429	0.41742	0.362293	Similar to Nfya: Nuclear transcription factor Y subunit alpha (Mus musculus OX%3D10090)	CBFB_NFYA
ANN11884	Chr6	39245409	39264194	-	18786	0.262014	0.37865	0.496098	0.615362	Similar to Srebf1: Sterol regulatory element-binding protein 1 (Mus musculus OX%3D10090)	HLH
ANN11888	Chr6	39356583	39374306	-	17724	0.795814	1.01685	1.14859	0.910933	Similar to Srebf1: Sterol regulatory element-binding protein 1 (Rattus norvegicus OX%3D10116)	HLH
ANN11889	Chr6	39384193	39390368	-	6176	0.437411	0.131315	0.769706	0.198977	Similar to bab1: Protein bric-a-brac 1 (Drosophila melanogaster OX%3D7227)	BTB
ANN11940	Chr6	41046304	41050154	+	3851	0.270799	2.46468	0.338559	0.412596	Similar to tc3a: Transposable element Tc3 transposase (Caenorhabditis elegans OX%3D6239)	PAX
ANN11975	Chr7	145911	160305	+	14395	1.27609	1.32664	1.13536	1.08621	Similar to ZNF540: Zinc finger protein 540 (Homo sapiens OX%3D9606)	zf-C2H2
ANN12043	Chr7	1653418	1665422	+	12005	0.995577	0.0505571	1.45059	0.0908754	Similar to pxt: Chorion peroxidase (Aedes aegypti OX%3D7159)	PAX
ANN12125	Chr7	3301251	3302628	+	1378	0.340406	0.99701	1.57877	0.915483	Similar to btbd17: BTB/POZ domain-containing protein 17 (Xenopus tropicalis OX%3D8364)	BTB
ANN12180	Chr7	4262106	4266100	+	3995	0.0234638	0.629994	0.19887	2.19417	Similar to ybx2-a: Y-box-binding protein 2-A (Xenopus laevis OX%3D8355)	CSD
ANN12193	Chr7	4482539	4484525	+	1987	0	0	0.0274859	0	Similar to JRKL: Jerky protein homolog-like (Homo sapiens OX%3D9606)	HTH_psq
ANN12204	Chr7	4635810	4638533	+	2724	0.103247	2.16057	0.0400933	1.68694	Similar to ybx2-a: Y-box-binding protein 2-A (Xenopus laevis OX%3D8355)	CSD
ANN12226	Chr7	5489408	5491223	+	1816	0	0	0	0	Similar to JRKL: Jerky protein homolog-like (Homo sapiens OX%3D9606)	HTH_psq
ANN12260	Chr7	6410899	6413349	-	2451	15.2086	6.91129	18.0673	6.90798	Similar to BTBD9: BTB/POZ domain-containing protein 9 (Bos taurus OX%3D9913)	BTB
ANN12280	Chr7	7093764	7108574	+	14811	1.15689	0.372351	1.20139	0.428083	Similar to F52C9.6: Putative uncharacterized transposon-derived protein F52C9.6 (Caenorhabditis elegans OX%3D6239)	zf-C2H2
ANN12328	Chr7	7915228	7916401	-	1174	21.5634	52.9712	21.3842	50.095	Similar to ZNF436: Zinc finger protein 436 (Homo sapiens OX%3D9606)	zf-H2C2_2
ANN12362	Chr7	8706006	8707412	+	1407	0.820728	0.692694	1.06387	1.44281	Similar to abd-A: Homeobox protein abdominal-A homolog (Anopheles gambiae OX%3D7165)	Homeodomain
ANN12380	Chr7	9971132	9973169	+	2038	0	0	0	0	Similar to TIGD1: Tigger transposable element-derived protein 1 (Homo sapiens OX%3D9606)	HTH_psq
ANN12383	Chr7	10259997	10261584	+	1588	0	0	0	0	Similar to hoxb7-b: Homeobox protein Hox-B7-B (Xenopus laevis OX%3D8355)	Homeodomain
ANN12388	Chr7	10542451	10573133	-	30683	0.662435	1.94371	0.946511	1.57988	Similar to SMAD6: Mothers against decapentaplegic homolog 6 (Gallus gallus OX%3D9031)	MH1
ANN12539	Chr7	14763400	14773770	+	10371	2.79199	0.296883	1.0306	0.198421	Similar to Transposable element Tcb2 transposase (Caenorhabditis briggsae OX%3D6238)	PAX
ANN12651	Chr7	18002436	18009655	+	7220	0.564721	1.18109	0.5731	1.16599	Similar to ZNF577: Zinc finger protein 577 (Homo sapiens OX%3D9606)	zf-H2C2_2
ANN12654	Chr7	18078133	18086747	-	8615	0.60663	1.93176	0.7209	1.66511	Similar to Znf436: Zinc finger protein 436 (Mus musculus OX%3D10090)	zf-H2C2_2
ANN12667	Chr7	18359582	18361789	-	2208	6.68891	11.4163	8.42768	8.63866	Similar to dimm: Protein dimmed (Drosophila melanogaster OX%3D7227)	HLH
ANN12673	Chr7	18435577	18456366	-	20790	0.179876	0.345707	0.170872	0.358699	Similar to pol: RNA-directed DNA polymerase from mobile element jockey (Drosophila melanogaster OX%3D7227)	zf-C2H2
ANN12682	Chr7	18605957	18608148	+	2192	0.559072	1.07934	1.78649	3.72132	Similar to dimm: Protein dimmed (Drosophila melanogaster OX%3D7227)	HLH
ANN12710	Chr7	19358657	19365440	+	6784	5.72722	3.54194	6.4864	2.79673	Similar to Mafg: Transcription factor MafG (Rattus norvegicus OX%3D10116)	TF_bZIP
ANN12716	Chr7	19627527	19635530	-	8004	2.95092	0.96228	3.55013	0.809001	Similar to Zfp26: Zinc finger protein 26 (Mus musculus OX%3D10090)	zf-C2H2
ANN12806	Chr7	21908910	21917492	-	8583	1.52789	2.61671	1.75971	2.03126	Similar to Znf366: Zinc finger protein 366 (Mus musculus OX%3D10090)	zf-C2H2
ANN12807	Chr7	21922077	21923001	-	925	8.43306	14.2595	10.9546	11.5999	Similar to SPAC11D3.17: Zinc finger protein C11D3.17 (Schizosaccharomyces pombe (strain 972 / ATCC 24843) OX%3D284812)	zf-C2H2
ANN12811	Chr7	22040330	22056768	-	16439	3.19266	3.35296	3.36606	2.90574	Similar to KAT5: Histone acetyltransferase KAT5 (Pongo abelii OX%3D9601)	MOZ_SAS
ANN12890	Chr7	24011939	24027376	-	15438	0.428916	0.258769	0.741232	0.437422	Similar to Gastrula zinc finger protein XlCGF46.1 (Fragment) (Xenopus laevis OX%3D8355)	zf-C2H2
ANN12914	Chr7	24596232	24600555	-	4324	0	0	0.11437	0.0747489	Similar to Pol: LINE-1 retrotransposable element ORF2 protein (Mus musculus OX%3D10090)	zf-C2H2
ANN12915	Chr7	24614353	24634249	+	19897	3.41647	2.66974	3.73547	2.33177	Similar to FOXK2: Forkhead box protein K2 (Homo sapiens OX%3D9606)	Forkhead
ANN12978	Chr7	26562389	26563904	-	1516	11.6277	24.9655	13.6574	22.3934	Similar to ZNF418: Zinc finger protein 418 (Homo sapiens OX%3D9606)	zf-C2H2
ANN12979	Chr7	26569585	26602045	-	32461	1.39079	3.10296	1.45541	2.71681	Similar to ZNF729: Zinc finger protein 729 (Homo sapiens OX%3D9606)	zf-C2H2
ANN13022	Chr7	28658838	28665770	+	6933	0.0321367	0.0213571	0.116916	0.230946	Similar to Transposable element Tcb2 transposase (Caenorhabditis briggsae OX%3D6238)	PAX
ANN13064	Chr7	29801789	29821154	+	19366	0.0816986	0.299662	0.0563168	0.0950571	Similar to ceh-19: Homeobox protein ceh-19 (Caenorhabditis elegans OX%3D6239)	Homeodomain
ANN13066	Chr7	29957382	29969055	+	11674	0.159648	0.190833	0.200206	0.170306	Similar to ceh-19: Homeobox protein ceh-19 (Caenorhabditis elegans OX%3D6239)	Homeodomain
ANN13129	Chr7	32425611	32428389	+	2779	7.60433	0.0532929	6.40219	0	Similar to Hoxb3: Homeobox protein Hox-B3 (Mus musculus OX%3D10090)	Homeodomain
ANN13130	Chr7	32456422	32461421	-	5000	0.0960699	1.84995	0.412113	1.37837	Similar to pb: Homeotic protein proboscipedia (Drosophila melanogaster OX%3D7227)	Homeodomain
ANN13134	Chr7	32618993	32620074	+	1082	0.0487494	1.06122	0	0.945889	Similar to hoxa1: Homeobox protein Hox-A1 (Fragment) (Xenopus laevis OX%3D8355)	Homeodomain
ANN13144	Chr7	32677207	32684425	-	7219	0.0535521	0.497321	0	0.362178	Similar to PRDM9: Histone-lysine N-methyltransferase PRDM9 (Homo sapiens OX%3D9606)	zf-C2H2
ANN13196	Chr7	34171819	34184934	-	13116	1.69759	1.58298	1.90052	1.16602	Similar to osa: Trithorax group protein osa (Drosophila melanogaster OX%3D7227)	ARID
ANN13254	Chr7	35319362	35323353	-	3992	0.282089	0.396095	0.551466	0.794988	Similar to JAZF1: Juxtaposed with another zinc finger protein 1 (Pongo abelii OX%3D9601)	zf-C2H2
ANN13269	Chr7	35670620	35686199	-	15580	1.55959	0.705235	1.9243	0.596134	Similar to GLI2: Zinc finger protein GLI2 (Fragment) (Gallus gallus OX%3D9031)	zf-H2C2_2
ANN13337	Chr7	37731407	37739072	+	7666	0.0122263	0	0	0.0347886	Similar to ceh-19: Homeobox protein ceh-19 (Caenorhabditis elegans OX%3D6239)	Homeodomain
ANN13388	Chr8	678809	680581	+	1773	26.6851	5.17232	26.7327	5.11839	Similar to litaf: Lipopolysaccharide-induced tumor necrosis factor-alpha factor homolog (Xenopus tropicalis OX%3D8364)	zf-LITAF-like
ANN13405	Chr8	1218298	1230060	+	11763	2.06342	2.93662	2.57717	2.77172	Similar to BTBD2: BTB/POZ domain-containing protein 2 (Homo sapiens OX%3D9606)	BTB
ANN13418	Chr8	1516770	1522400	-	5631	21.3462	4.64425	17.5348	2.53032	Similar to litaf: Lipopolysaccharide-induced tumor necrosis factor-alpha factor homolog (Xenopus tropicalis OX%3D8364)	zf-LITAF-like
ANN13496	Chr8	2962619	2969026	+	6408	8.66819	2.69142	7.86759	3.60452	Similar to ZNF84: Zinc finger protein 84 (Homo sapiens OX%3D9606)	zf-H2C2_2
ANN13497	Chr8	2971314	2978723	+	7410	2.89444	1.47453	3.23958	1.35758	Similar to ZNF850: Zinc finger protein 850 (Homo sapiens OX%3D9606)	zf-C2H2
ANN13498	Chr8	2978744	2984555	+	5812	3.17981	1.21906	3.4925	1.08955	Similar to ZNF227: Zinc finger protein 227 (Homo sapiens OX%3D9606)	zf-H2C2_2
ANN13499	Chr8	2984903	2987252	+	2350	2.67717	2.15368	1.83904	0.908441	Similar to ZNF22: Zinc finger protein 22 (Pongo abelii OX%3D9601)	zf-H2C2_2
ANN13500	Chr8	2989246	2991846	+	2601	0.998085	1.62001	1.85274	1.48565	Similar to ZNF514: Zinc finger protein 514 (Homo sapiens OX%3D9606)	zf-H2C2_2
ANN13516	Chr8	3395469	3406683	+	11215	1.22009	0.860433	1.67132	1.23092	Similar to Znf112: Zinc finger protein 112 (Mus musculus OX%3D10090)	zf-C2H2
ANN13710	Chr8	7357398	7367595	-	10198	0.183901	0.14955	0.167308	0.162828	Similar to ZNF143: Zinc finger protein 143 (Bos taurus OX%3D9913)	zf-C2H2
ANN13711	Chr8	7375452	7381233	-	5782	0.0781063	0.0256094	0.0668417	0.0115315	Similar to Znf76: Zinc finger protein 76 (Mus musculus OX%3D10090)	zf-C2H2
ANN13716	Chr8	7447538	7459523	-	11986	0.244495	0.312175	0.400162	0.428989	Similar to Znf76: Zinc finger protein 76 (Mus musculus OX%3D10090)	zf-H2C2_2
ANN13723	Chr8	7568407	7569695	-	1289	9.19833	9.63332	11.5477	11.8691	Similar to NC2beta: Protein Dr1 (Drosophila melanogaster OX%3D7227)	NFYB
ANN13727	Chr8	7630023	7651103	+	21081	0.190089	0.285083	0.209112	0.384348	Similar to rest: RE1-silencing transcription factor (Danio rerio OX%3D7955)	zf-C2H2
ANN13750	Chr8	8053020	8061207	+	8188	1.16112	2.19817	1.26097	1.34463	Similar to mnt: Max-binding protein MNT (Xenopus laevis OX%3D8355)	HLH
ANN13755	Chr8	8243686	8246864	+	3179	0.0516779	0.17938	0.156098	0.139896	Similar to mnt: Max-binding protein MNT (Xenopus laevis OX%3D8355)	HLH
ANN13798	Chr8	9081610	9082228	+	619	0	1.162	0	0.54936	Similar to foxi2: Forkhead box protein I2 (Xenopus tropicalis OX%3D8364)	Forkhead
ANN13806	Chr8	9252390	9253476	+	1087	0.0970499	3.35355	0.0895497	1.67263	Similar to fd96Cb: Fork head domain-containing protein FD5 (Drosophila melanogaster OX%3D7227)	Forkhead
ANN13849	Chr8	10179693	10185133	-	5441	7.19005	4.38881	7.15866	3.16774	Similar to ZNF729: Zinc finger protein 729 (Homo sapiens OX%3D9606)	zf-H2C2_2
ANN13853	Chr8	10221112	10222229	-	1118	1.18024	1.31876	1.40104	0.701964	Similar to ZNF436: Zinc finger protein 436 (Homo sapiens OX%3D9606)	zf-H2C2_2
ANN13854	Chr8	10228576	10229168	-	593	86.1932	29.8538	68.8211	26.2105	Similar to ZFP2: Zinc finger protein 2 homolog (Homo sapiens OX%3D9606)	zf-H2C2_2
ANN13855	Chr8	10229200	10230715	-	1516	33.8927	10.1977	32.8078	9.34859	Similar to Prdm12: PR domain zinc finger protein 12 (Mus musculus OX%3D10090)	zf-H2C2_2
ANN13867	Chr8	10581140	10583632	+	2493	20.0099	11.9902	20.299	11.1371	Similar to Zfp2: Zinc finger protein 2 (Mus musculus OX%3D10090)	zf-H2C2_2
ANN13868	Chr8	10586148	10591590	+	5443	17.4167	13.3573	12.0084	9.61857	Similar to ZNF436: Zinc finger protein 436 (Homo sapiens OX%3D9606)	zf-H2C2_2
ANN13937	Chr8	11998045	12021010	-	22966	1.11935	1.33592	1.48668	1.50288	Similar to Ncor1: Nuclear receptor corepressor 1 (Mus musculus OX%3D10090)	Myb_DNA-binding
ANN14028	Chr8	14277186	14282847	+	5662	0.062202	0.532036	0.0964265	0.664212	Similar to TBX1: T-box transcription factor TBX1 (Homo sapiens OX%3D9606)	T-box
ANN14029	Chr8	14286306	14288724	+	2419	0	0.298493	0	0.952517	Similar to Tbx1: T-box transcription factor TBX1 (Mus musculus OX%3D10090)	T-box
ANN14061	Chr8	15552213	15554466	-	2254	0.174365	1.89922	0.205046	2.56581	Similar to lhx5: LIM/homeobox protein Lhx5 (Xenopus laevis OX%3D8355)	Homeodomain
ANN14069	Chr8	15936928	15943357	-	6430	20.8245	11.7735	13.0909	9.18483	Similar to ZNF45: Zinc finger protein 45 (Homo sapiens OX%3D9606)	zf-H2C2_2
ANN14112	Chr8	17165124	17179022	-	13899	1.16801	9.06627	1.12905	7.32518	Similar to ct: Homeobox protein cut (Drosophila melanogaster OX%3D7227)	CUT
ANN14143	Chr8	18321242	18341750	+	20509	1.60677	2.32914	2.18384	2.01242	Similar to ZNF808: Zinc finger protein 808 (Homo sapiens OX%3D9606)	zf-H2C2_2
ANN14192	Chr8	19872503	19900127	-	27625	2.6037	3.05096	3.75054	2.40917	Similar to CREB3L4: Cyclic AMP-responsive element-binding protein 3-like protein 4 (Homo sapiens OX%3D9606)	TF_bZIP
ANN14212	Chr8	20223635	20227259	-	3625	0.0145414	0	0.0156563	0	Similar to pol: RNA-directed DNA polymerase from mobile element jockey (Drosophila melanogaster OX%3D7227)	zf-C2H2
ANN14294	Chr8	22209989	22245381	+	35393	0.29436	0.312543	0.563536	0.506561	Similar to PBRM1: Protein polybromo-1 (Homo sapiens OX%3D9606)	HMG_box
ANN14298	Chr8	22318597	22324204	+	5608	1.92188	2.26217	1.45001	0.76179	Similar to PBRM1: Protein polybromo-1 (Homo sapiens OX%3D9606)	HMG_box
ANN14534	Chr8	29447663	29450609	-	2947	0.394047	1.30033	0.142893	1.59415	Similar to svp: Steroid receptor seven-up%2C isoform A (Drosophila melanogaster OX%3D7227)	Retinoid_X_Receptor-like
ANN14535	Chr8	29452295	29458110	-	5816	0.0775952	0.631943	0.168561	1.045	Similar to svp: Steroid receptor seven-up%2C isoform A (Drosophila melanogaster OX%3D7227)	Retinoid_X_Receptor-like
ANN14543	Chr8	30028477	30033006	+	4530	0.0854501	0.455255	0.0250556	0.21734	Similar to bi: Optomotor-blind protein (Drosophila melanogaster OX%3D7227)	T-box
ANN14544	Chr8	30087624	30099288	+	11665	0.234125	2.0275	0.28634	1.40174	Similar to bi: Optomotor-blind protein (Drosophila melanogaster OX%3D7227)	T-box
ANN14703	Chr11	666120	685332	-	19213	0.079919	7.65534	0.150303	5.6531	Similar to ZFHX4: Zinc finger homeobox protein 4 (Homo sapiens OX%3D9606)	Homeodomain
ANN14740	Chr11	1872660	1877383	-	4724	0.19713	0.619917	0.200674	0.360366	Similar to ZNF595: Zinc finger protein 595 (Homo sapiens OX%3D9606)	zf-C2H2
ANN14742	Chr11	1917824	1927848	-	10025	10.3573	11.2067	11.5428	9.21614	Similar to lola: Longitudinals lacking protein%2C isoforms A/B/D/L (Drosophila melanogaster OX%3D7227)	BTB
ANN14824	Chr11	4025803	4044468	+	18666	0.0332863	0.0856465	0.0911337	0.0566133	Similar to lola: Longitudinals lacking protein%2C isoforms H/M/V (Drosophila melanogaster OX%3D7227)	BTB
ANN14825	Chr11	4051416	4053009	+	1594	1.30951	2.51371	2.14208	1.26317	Similar to lola: Longitudinals lacking protein%2C isoforms F/I/K/T (Drosophila melanogaster OX%3D7227)	BTB
ANN14826	Chr11	4099276	4099741	+	466	0.226658	1.76758	0.209142	0.430088	Similar to lola: Longitudinals lacking protein%2C isoforms A/B/D/L (Drosophila melanogaster OX%3D7227)	zf-C2H2
ANN14830	Chr11	4153845	4154310	+	466	3.09977	3.80294	5.60352	2.60767	Similar to ZBTB24: Zinc finger and BTB domain-containing protein 24 (Homo sapiens OX%3D9606)	zf-C2H2
ANN14850	Chr11	4686654	4711322	+	24669	0.0648774	0.0160482	0.0266816	0.0206444	Similar to lola: Longitudinals lacking protein%2C isoforms H/M/V (Drosophila melanogaster OX%3D7227)	BTB
ANN14853	Chr11	4760927	4766167	-	5241	0.0201138	0	0	0.0833309	Similar to THAP9: DNA transposase THAP9 (Homo sapiens OX%3D9606)	THAP
ANN14889	Chr11	5368058	5369615	-	1558	14.2932	15.8659	15.425	15.2716	Similar to POGK: Pogo transposable element with KRAB domain (Homo sapiens OX%3D9606)	HTH_psq
ANN14893	Chr11	5413421	5416380	-	2960	4.02614	8.0612	6.46757	8.07655	Similar to Rest: RE1-silencing transcription factor (Rattus norvegicus OX%3D10116)	zf-H2C2_2
ANN14894	Chr11	5420307	5420806	-	500	7.79559	10.5539	10.1035	7.0281	Similar to Rest: RE1-silencing transcription factor (Mus musculus OX%3D10090)	zf-H2C2_2
ANN14895	Chr11	5431242	5434197	-	2956	15.0289	14.1438	14.4141	11.4167	Similar to Prdm9: Histone-lysine N-methyltransferase PRDM9 (Mus musculus OX%3D10090)	zf-H2C2_2
ANN14896	Chr11	5434604	5435476	-	873	18.165	18.2635	19.1062	23.0607	Similar to Rest: RE1-silencing transcription factor (Mus musculus OX%3D10090)	zf-C2H2
ANN14899	Chr11	5440127	5441167	-	1041	19.1997	19.738	18.73	16.8732	Similar to Rest: RE1-silencing transcription factor (Rattus norvegicus OX%3D10116)	zf-H2C2_2
ANN14900	Chr11	5441204	5441911	-	708	20.7408	14.3923	13.5615	12.1321	Similar to REST: RE1-silencing transcription factor (Homo sapiens OX%3D9606)	zf-H2C2_2
ANN14901	Chr11	5442390	5445813	-	3424	4.20916	4.7209	5.11086	5.99423	Similar to Rest: RE1-silencing transcription factor (Rattus norvegicus OX%3D10116)	zf-H2C2_2
ANN14902	Chr11	5446698	5449428	-	2731	10.7436	10.4165	9.66233	8.24406	Similar to rest-a: RE1-silencing transcription factor A (Xenopus laevis OX%3D8355)	zf-H2C2_2
ANN14905	Chr11	5455273	5457064	-	1792	9.59101	10.9745	10.4934	10.8417	Similar to ZFP64: Zinc finger protein 64 (Homo sapiens OX%3D9606)	zf-C2H2
ANN14906	Chr11	5457760	5458624	-	865	26.7812	21.3298	19.0588	20.748	Similar to Znf513: Zinc finger protein 513 (Mus musculus OX%3D10090)	zf-H2C2_2
ANN14907	Chr11	5458647	5464126	-	5480	14.315	11.8542	10.6611	8.4034	Similar to ZNF615: Zinc finger protein 615 (Homo sapiens OX%3D9606)	zf-H2C2_2
ANN14908	Chr11	5465560	5467524	-	1965	19.2267	15.2703	19.0914	13.2477	Similar to Znf518b: Zinc finger protein 518B (Mus musculus OX%3D10090)	zf-C2H2
ANN14909	Chr11	5468430	5472660	-	4231	23.9873	23.1551	27.0068	17.4277	Similar to Zinc finger protein Xfin (Xenopus laevis OX%3D8355)	zf-C2H2
ANN14910	Chr11	5473146	5473431	-	286	33.849	37.8408	40.01	33.0201	Similar to ZFY: Zinc finger Y-chromosomal protein (Fragment) (Sus scrofa OX%3D9823)	zf-H2C2_2
ANN14911	Chr11	5474515	5476097	-	1583	14.8418	10.5864	12.7444	5.65776	Similar to CTCF: Transcriptional repressor CTCF (Gallus gallus OX%3D9031)	zf-H2C2_2
ANN14941	Chr11	6048014	6049601	-	1588	69.5754	8.87816	69.3161	7.07609	Similar to BTBD9: BTB/POZ domain-containing protein 9 (Homo sapiens OX%3D9606)	BTB
ANN14999	Chr11	7764437	7766165	+	1729	4.18429	10.7839	5.74303	8.7523	Similar to lola: Longitudinals lacking protein%2C isoforms A/B/D/L (Drosophila melanogaster OX%3D7227)	zf-C2H2
ANN15000	Chr11	7768860	7769289	+	430	15.2517	30.0387	15.3191	25.3944	Similar to lola: Longitudinals lacking protein%2C isoforms A/B/D/L (Drosophila melanogaster OX%3D7227)	zf-C2H2
ANN15002	Chr11	7787622	7789411	+	1790	10.7429	16.0346	8.8571	17.6568	Similar to ZNF579: Zinc finger protein 579 (Homo sapiens OX%3D9606)	zf-C2H2
ANN15003	Chr11	7792283	7795004	+	2722	7.47868	11.8855	7.2895	8.66398	Similar to ZNF786: Zinc finger protein 786 (Homo sapiens OX%3D9606)	zf-C2H2
ANN15006	Chr11	7825205	7834010	-	8806	8.27041	16.2069	10.1131	14.0561	Similar to lola: Longitudinals lacking protein%2C isoform G (Drosophila melanogaster OX%3D7227)	zf-C2H2
ANN15044	Chr11	8702661	8711259	-	8599	0.0558564	4.189	0.116395	3.79306	Similar to tio: Protein tiptop (Drosophila melanogaster OX%3D7227)	zf-C2H2
ANN15057	Chr11	9009723	9012735	-	3013	22.5197	14.3256	22.696	14.3893	Similar to ZFP2: Zinc finger protein 2 homolog (Homo sapiens OX%3D9606)	zf-H2C2_2
ANN15103	Chr11	9982781	9984846	+	2066	28.2186	17.6391	22.2624	19.082	Similar to ZNF407: Zinc finger protein 407 (Homo sapiens OX%3D9606)	zf-H2C2_2
ANN15108	Chr11	10042744	10043185	-	442	17.639	9.12637	12.0884	14.2918	Similar to Rest: RE1-silencing transcription factor (Rattus norvegicus OX%3D10116)	zf-H2C2_2
ANN15109	Chr11	10043366	10049444	-	6079	5.77531	5.06131	5.86577	5.75783	Similar to ZNF271: Zinc finger protein 271 (Pongo abelii OX%3D9601)	zf-H2C2_2
ANN15110	Chr11	10063856	10065207	-	1352	8.39832	4.89738	5.83523	3.89551	Similar to REST: RE1-silencing transcription factor (Homo sapiens OX%3D9606)	zf-H2C2_2
ANN15111	Chr11	10066141	10076180	-	10040	2.9404	2.72545	2.67459	1.64268	Similar to Prdm9: Histone-lysine N-methyltransferase PRDM9 (Mus musculus OX%3D10090)	zf-H2C2_2
ANN15114	Chr11	10091143	10091879	-	737	13.2234	11.1686	13.6222	8.64955	Similar to lola: Longitudinals lacking protein%2C isoforms A/B/D/L (Drosophila melanogaster OX%3D7227)	zf-C2H2
ANN15115	Chr11	10092725	10094388	-	1664	14.0105	8.25371	11.9575	8.15747	Similar to lola: Longitudinals lacking protein%2C isoforms A/B/D/L (Drosophila melanogaster OX%3D7227)	zf-C2H2
ANN15116	Chr11	10095591	10097102	-	1512	5.62031	3.48055	6.85632	5.66346	Similar to lola: Longitudinals lacking protein%2C isoforms A/B/D/L (Drosophila melanogaster OX%3D7227)	zf-C2H2
ANN15117	Chr11	10097237	10097504	-	268	21.3333	5.20937	13.3087	12.5012	Similar to lola: Longitudinals lacking protein%2C isoforms A/B/D/L (Drosophila melanogaster OX%3D7227)	zf-C2H2
ANN15118	Chr11	10098195	10099353	-	1159	6.28001	4.77439	7.51522	3.04825	Similar to lola: Longitudinals lacking protein%2C isoform G (Drosophila melanogaster OX%3D7227)	zf-C2H2
ANN15119	Chr11	10099824	10101648	-	1825	7.84889	6.87147	10.5349	3.7073	Similar to Zfp27: Zinc finger protein 27 (Mus musculus OX%3D10090)	zf-C2H2
ANN15120	Chr11	10102087	10102808	-	722	19.2648	10.787	16.6111	16.6104	Similar to lola: Longitudinals lacking protein%2C isoforms N/O/W/X/Y (Drosophila melanogaster OX%3D7227)	zf-C2H2
ANN15121	Chr11	10103494	10108260	-	4767	5.38157	5.29844	5.38412	5.11202	Similar to ZNF99: Zinc finger protein 99 (Homo sapiens OX%3D9606)	zf-C2H2
ANN15122	Chr11	10108928	10110785	-	1858	9.41693	6.33895	7.67577	5.85415	Similar to lola: Longitudinals lacking protein%2C isoforms N/O/W/X/Y (Drosophila melanogaster OX%3D7227)	zf-C2H2
ANN15123	Chr11	10111726	10112351	-	626	11.3465	8.24699	7.50562	7.72547	Similar to lola: Longitudinals lacking protein%2C isoforms A/B/D/L (Drosophila melanogaster OX%3D7227)	zf-C2H2
ANN15124	Chr11	10112473	10117348	-	4876	8.35208	7.85746	7.55624	6.17157	Similar to lola: Longitudinals lacking protein%2C isoforms N/O/W/X/Y (Drosophila melanogaster OX%3D7227)	zf-C2H2
ANN15125	Chr11	10118268	10122237	-	3970	6.19149	5.09696	6.14998	3.84249	Similar to lola: Longitudinals lacking protein%2C isoforms N/O/W/X/Y (Drosophila melanogaster OX%3D7227)	zf-C2H2
ANN15126	Chr11	10132944	10133720	-	777	1.14018	3.22399	2.40162	2.96834	Similar to lola: Longitudinals lacking protein%2C isoforms A/B/D/L (Drosophila melanogaster OX%3D7227)	zf-C2H2
ANN15127	Chr11	10133782	10134166	-	385	7.79533	6.87126	8.35994	9.25501	Similar to lola: Longitudinals lacking protein%2C isoforms A/B/D/L (Drosophila melanogaster OX%3D7227)	zf-C2H2
ANN15129	Chr11	10137041	10137642	-	602	9.26305	9.42309	8.04725	8.90847	Similar to lola: Longitudinals lacking protein%2C isoforms N/O/W/X/Y (Drosophila melanogaster OX%3D7227)	zf-C2H2
ANN15131	Chr11	10140727	10141428	-	702	16.6128	9.05449	12.0987	12.3088	Similar to Zbtb49: Zinc finger and BTB domain-containing protein 49 (Mus musculus OX%3D10090)	zf-H2C2_2
ANN15132	Chr11	10153988	10156279	-	2292	7.25798	5.8972	6.65913	5.30775	Similar to ZNF217: Zinc finger protein 217 (Homo sapiens OX%3D9606)	zf-H2C2_2
ANN15133	Chr11	10156750	10174447	-	17698	6.12066	3.94213	5.9514	4.64977	Similar to Tf2-6: Transposon Tf2-6 polyprotein (Schizosaccharomyces pombe (strain 972 / ATCC 24843) OX%3D284812)	zf-H2C2_2
ANN15134	Chr11	10179717	10187171	-	7455	4.07846	4.51314	4.30829	4.44974	Similar to rest-a: RE1-silencing transcription factor A (Xenopus laevis OX%3D8355)	zf-H2C2_2
ANN15135	Chr11	10200915	10202118	-	1204	28.1076	7.82579	24.5084	8.16388	Similar to ikzf5: Zinc finger protein Pegasus (Xenopus tropicalis OX%3D8364)	zf-H2C2_2
ANN15136	Chr11	10219821	10251142	+	31322	10.1045	7.55183	9.23278	6.82858	Similar to Zinc finger protein Xfin (Xenopus laevis OX%3D8355)	zf-H2C2_2
ANN15178	Chr11	11030384	11068828	+	38445	1.07848	0.696622	1.67848	0.726118	Similar to dom: Helicase domino (Drosophila melanogaster OX%3D7227)	SNF2-rel_dom
ANN15293	Chr11	14851712	14864820	+	13109	2.91235	4.03456	3.51234	3.2557	Similar to Zfp26: Zinc finger protein 26 (Mus musculus OX%3D10090)	zf-H2C2_2
ANN15294	Chr11	14865612	14866839	+	1228	4.34656	2.88628	5.46609	3.55202	Similar to CTCFL: Transcriptional repressor CTCFL (Homo sapiens OX%3D9606)	zf-H2C2_2
ANN15295	Chr11	14876745	14879771	+	3027	8.40852	7.36237	8.36232	5.51703	Similar to ZNF77: Zinc finger protein 77 (Homo sapiens OX%3D9606)	zf-H2C2_2
ANN15296	Chr11	14881366	14885038	+	3673	2.2628	5.49714	2.6606	2.28947	Similar to Znf513: Zinc finger protein 513 (Rattus norvegicus OX%3D10116)	zf-H2C2_2
ANN15297	Chr11	14898430	14900523	+	2094	3.44072	5.16925	6.50105	5.27541	Similar to CTCF: Transcriptional repressor CTCF (Gallus gallus OX%3D9031)	zf-H2C2_2
ANN15298	Chr11	14903331	14904109	+	779	3.81892	3.92773	6.8852	1.92966	Similar to ZFY: Zinc finger Y-chromosomal protein (Pan troglodytes OX%3D9598)	zf-H2C2_2
ANN15299	Chr11	14904133	14906518	+	2386	3.46198	2.88148	2.8459	3.41259	Similar to ZNF536: Zinc finger protein 536 (Homo sapiens OX%3D9606)	zf-H2C2_2
ANN15300	Chr11	14906785	14907829	+	1045	9.27965	6.47446	7.00013	3.87052	Similar to ZNF219: Zinc finger protein 219 (Homo sapiens OX%3D9606)	zf-H2C2_2
ANN15301	Chr11	14910549	14912876	+	2328	13.1809	7.5385	13.8212	9.05758	Similar to CTCFL: Transcriptional repressor CTCFL (Homo sapiens OX%3D9606)	zf-H2C2_2
ANN15302	Chr11	14915190	14917679	+	2490	6.15883	4.98717	5.73571	4.36914	Similar to ZNF845: Zinc finger protein 845 (Homo sapiens OX%3D9606)	zf-H2C2_2
ANN15303	Chr11	14918168	14921117	+	2950	1.44109	2.25825	1.25116	2.06513	Similar to ZNF236: Zinc finger protein 236 (Homo sapiens OX%3D9606)	zf-H2C2_2
ANN15304	Chr11	14921675	14922503	+	829	3.14226	3.25776	2.99665	2.9286	Similar to rest-a: RE1-silencing transcription factor A (Xenopus laevis OX%3D8355)	zf-H2C2_2
ANN15305	Chr11	14922530	14924139	+	1610	0.70992	1.13862	0.528609	1.67864	Similar to ZBTB46: Zinc finger and BTB domain-containing protein 46 (Homo sapiens OX%3D9606)	zf-H2C2_2
ANN15306	Chr11	14926001	14927063	+	1063	4.85382	11.0599	5.29281	8.22712	Similar to Rest: RE1-silencing transcription factor (Mus musculus OX%3D10090)	zf-H2C2_2
ANN15308	Chr11	14934816	14936658	+	1843	6.57748	5.55501	6.47159	6.69274	Similar to Rest: RE1-silencing transcription factor (Rattus norvegicus OX%3D10116)	zf-H2C2_2
ANN15313	Chr11	14962805	14966629	+	3825	6.09186	5.75232	6.70714	5.93106	Similar to ZNF728: Zinc finger protein 728 (Homo sapiens OX%3D9606)	zf-H2C2_2
ANN15314	Chr11	14971080	14973349	+	2270	5.80814	4.23505	5.77087	4.54149	Similar to REST: RE1-silencing transcription factor (Homo sapiens OX%3D9606)	zf-H2C2_2
ANN15315	Chr11	14973391	14974488	+	1098	7.97061	3.95777	7.89032	3.81953	Similar to zfy1: Zinc finger Y-chromosomal protein 1 (Xenopus laevis OX%3D8355)	zf-H2C2_2
ANN15316	Chr11	14974574	14976711	+	2138	6.4426	4.59565	6.66562	4.23779	Similar to Znf513: Zinc finger protein 513 (Mus musculus OX%3D10090)	zf-H2C2_2
ANN15317	Chr11	14977141	14979579	+	2439	4.38718	4.73625	5.26019	4.39522	Similar to Rest: RE1-silencing transcription factor (Rattus norvegicus OX%3D10116)	zf-H2C2_2
ANN15318	Chr11	14980643	14982394	+	1752	8.10739	7.9133	10.364	7.74748	Similar to rest: RE1-silencing transcription factor (Danio rerio OX%3D7955)	zf-H2C2_2
ANN15319	Chr11	14983013	14987009	+	3997	6.02369	6.03366	5.41454	5.75661	Similar to ZFP64: Zinc finger protein 64 (Homo sapiens OX%3D9606)	zf-H2C2_2
ANN15320	Chr11	14987431	14990187	+	2757	8.37586	8.08808	8.43904	5.7903	Similar to Znf335: Zinc finger protein 335 (Rattus norvegicus OX%3D10116)	zf-H2C2_2
ANN15322	Chr11	14996651	14997309	+	659	5.09215	1.59779	4.14145	3.32935	Similar to ZFY: Zinc finger Y-chromosomal protein (Fragment) (Sus scrofa OX%3D9823)	zf-H2C2_2
ANN15323	Chr11	15005323	15011370	+	6048	8.96025	7.53062	9.53261	7.98496	Similar to Rest: RE1-silencing transcription factor (Mus musculus OX%3D10090)	zf-H2C2_2
ANN15324	Chr11	15011925	15014837	+	2913	5.853	4.99054	4.88428	4.3846	Similar to Znf394: Zinc finger protein 394 (Mus musculus OX%3D10090)	zf-H2C2_2
ANN15325	Chr11	15014976	15015604	+	629	14.306	6.56516	9.86462	3.68092	Similar to MNL1: Transcriptional regulator MNL1 (Candida albicans (strain SC5314 / ATCC MYA-2876) OX%3D237561)	zf-H2C2_2
ANN15326	Chr11	15015807	15019168	+	3362	3.13542	2.93673	3.98788	2.77573	Similar to Prdm9: Histone-lysine N-methyltransferase PRDM9 (Rattus norvegicus OX%3D10116)	zf-H2C2_2
ANN15327	Chr11	15020439	15025418	+	4980	6.03763	6.25941	7.6874	5.99152	Similar to REST: RE1-silencing transcription factor (Homo sapiens OX%3D9606)	zf-H2C2_2
ANN15328	Chr11	15025962	15026322	+	361	9.09856	8.23456	20.2745	21.1069	Similar to rest: RE1-silencing transcription factor (Danio rerio OX%3D7955)	zf-H2C2_2
ANN15329	Chr11	15031011	15033187	+	2177	4.86783	3.24177	3.86977	3.16009	Similar to znf219: Zinc finger protein 219 (Danio rerio OX%3D7955)	zf-H2C2_2
ANN15330	Chr11	15036436	15036936	+	501	7.88662	8.00663	9.26523	5.11243	Similar to ZFY: Zinc finger Y-chromosomal protein (Fragment) (Sus scrofa OX%3D9823)	zf-C2H2
ANN15331	Chr11	15038303	15041140	+	2838	3.05557	1.91709	2.72147	1.32878	Similar to Ikaros family zinc finger protein (Oikopleura dioica OX%3D34765)	zf-H2C2_2
ANN15332	Chr11	15043015	15046271	+	3257	8.85388	5.44248	7.82516	5.60626	Similar to Rest: RE1-silencing transcription factor (Mus musculus OX%3D10090)	zf-H2C2_2
ANN15333	Chr11	15049398	15050848	+	1451	7.64367	5.4859	8.67414	4.84794	Similar to Rest: RE1-silencing transcription factor (Rattus norvegicus OX%3D10116)	zf-H2C2_2
ANN15334	Chr11	15052657	15056930	+	4274	5.57424	3.30197	5.74586	4.02303	Similar to Znf513: Zinc finger protein 513 (Mus musculus OX%3D10090)	zf-H2C2_2
ANN15335	Chr11	15057562	15058364	+	803	5.04921	7.06294	5.57482	3.90851	Similar to Ctcfl: Transcriptional repressor CTCFL (Mus musculus OX%3D10090)	zf-H2C2_2
ANN15336	Chr11	15058858	15059289	+	432	13.1904	10.8364	9.48946	9.36238	Similar to ZNF335: Zinc finger protein 335 (Homo sapiens OX%3D9606)	zf-H2C2_2
ANN15338	Chr11	15065839	15067175	+	1337	8.73459	4.16572	6.44797	5.8196	Similar to Znf513: Zinc finger protein 513 (Mus musculus OX%3D10090)	zf-H2C2_2
ANN15339	Chr11	15069069	15073664	+	4596	3.65281	3.23734	3.36171	2.20621	Similar to mynn: Myoneurin (Danio rerio OX%3D7955)	zf-H2C2_2
ANN15345	Chr11	15226543	15229823	+	3281	0.275319	0.0665732	1.15711	0.168786	Similar to sp9: Transcription factor Sp9 (Xenopus tropicalis OX%3D8364)	zf-H2C2_2
ANN15353	Chr11	15450330	15466317	-	15988	2.27363	3.51199	2.16863	3.11967	Similar to bab1: Protein bric-a-brac 1 (Drosophila melanogaster OX%3D7227)	HTH_psq
ANN15354	Chr11	15491168	15492281	+	1114	2426.38	2301.87	2339.84	1973.56	Similar to lola: Longitudinals lacking protein%2C isoforms H/M/V (Drosophila melanogaster OX%3D7227)	BTB
ANN15381	Chr11	16119031	16124765	-	5735	0.0920082	0	0	0.0310315	Similar to Transposable element Tcb2 transposase (Caenorhabditis briggsae OX%3D6238)	PAX
ANN15427	Chr11	16879291	16882947	-	3657	7.40679	8.17884	8.30455	7.95309	Similar to TNFAIP1: BTB/POZ domain-containing adapter for CUL3-mediated RhoA degradation protein 2 (Gallus gallus OX%3D9031)	BTB
ANN15441	Chr11	17089957	17095619	-	5663	4.73525	3.98595	4.10986	1.6417	Similar to Zbtb41: Zinc finger and BTB domain-containing protein 41 (Mus musculus OX%3D10090)	zf-C2H2
ANN15452	Chr11	17273307	17281170	-	7864	13.9553	5.7566	15.9469	4.82006	Similar to ZNF547: Zinc finger protein 547 (Pongo abelii OX%3D9601)	zf-C2H2
ANN15533	Chr11	19016376	19022231	+	5856	0.362162	2.54763	0.0193812	2.7594	Similar to ZNF76: Zinc finger protein 76 (Homo sapiens OX%3D9606)	zf-C2H2
ANN15615	Chr11	21177683	21178430	+	748	0.141291	0	0.29806	0	Similar to Transposable element Tcb2 transposase (Caenorhabditis briggsae OX%3D6238)	PAX
ANN15677	Chr11	22752098	22754667	-	2570	0.451446	2.04142	1.31741	1.0888	Similar to lolal: Longitudinals lacking protein-like (Drosophila melanogaster OX%3D7227)	BTB
ANN15686	Chr11	22875602	22888850	-	13249	3.53914	4.99475	4.0872	3.2473	Similar to Znf771: Zinc finger protein 771 (Mus musculus OX%3D10090)	zf-H2C2_2
ANN15689	Chr11	22921127	22921908	-	782	7.62325	3.75291	7.38873	1.83146	Similar to lola: Longitudinals lacking protein%2C isoform G (Drosophila melanogaster OX%3D7227)	zf-C2H2
ANN15693	Chr11	22934095	22935425	-	1331	26.3165	23.6317	20.1605	17.0832	Similar to Rest: RE1-silencing transcription factor (Rattus norvegicus OX%3D10116)	zf-C2H2
ANN15694	Chr11	22958701	22959773	-	1073	6.92425	2.5032	5.87765	1.29501	Similar to lola: Longitudinals lacking protein%2C isoforms H/M/V (Drosophila melanogaster OX%3D7227)	BTB
ANN15704	Chr11	23091255	23092886	+	1632	24.7695	28.9272	26.8738	27.7573	Similar to CG9705: Cold shock domain-containing protein CG9705 (Drosophila melanogaster OX%3D7227)	CSD
ANN15733	Chr11	23623292	23626511	-	3220	14.9866	11.4377	15.3639	9.52213	Similar to ZNF600: Zinc finger protein 600 (Homo sapiens OX%3D9606)	zf-H2C2_2
ANN15734	Chr11	23628165	23637418	-	9254	8.44905	7.67157	9.79845	8.22713	Similar to ZNF729: Zinc finger protein 729 (Homo sapiens OX%3D9606)	zf-H2C2_2
ANN15736	Chr11	23639929	23642288	-	2360	16.1283	13.6191	15.8975	10.8467	Similar to Zfp26: Zinc finger protein 26 (Mus musculus OX%3D10090)	zf-C2H2
ANN15745	Chr11	23852594	23855536	-	2943	7.95671	7.04986	7.78965	6.40048	Similar to ZNF729: Zinc finger protein 729 (Homo sapiens OX%3D9606)	zf-H2C2_2
ANN15746	Chr11	23855565	23857885	-	2321	2.15419	2.39619	2.64891	1.92451	Similar to ZNF142: Zinc finger protein 142 (Homo sapiens OX%3D9606)	zf-C2H2
ANN15747	Chr11	23862405	23867385	-	4981	3.52143	3.44616	2.66575	2.354	Similar to Znf513: Zinc finger protein 513 (Mus musculus OX%3D10090)	zf-H2C2_2
ANN15787	Chr11	24770353	24773090	+	2738	0	0	0.0829206	0	Similar to pol: Retrovirus-related Pol polyprotein from type-2 retrotransposable element R2DM (Drosophila melanogaster OX%3D7227)	zf-C2H2
ANN15801	Chr11	25164759	25168632	+	3874	0.0544261	0.242654	0.0585989	0.212372	Similar to pol: Retrovirus-related Pol polyprotein from type-2 retrotransposable element R2DM (Drosophila melanogaster OX%3D7227)	zf-C2H2
ANN15824	Chr11	25592821	25609409	-	16589	1.07783	0.947257	1.07032	0.955783	Similar to Klhl26: Kelch-like protein 26 (Mus musculus OX%3D10090)	BTB
ANN15860	Chr11	26626787	26645334	+	18548	0.777944	0.519402	0.909431	0.490687	Similar to Mlxipl: Carbohydrate-responsive element-binding protein (Mus musculus OX%3D10090)	HLH
ANN15869	Chr11	27048678	27065443	-	16766	0.0423279	0.0472265	0.0992172	0.0414629	Similar to ZNF665: Zinc finger protein 665 (Homo sapiens OX%3D9606)	zf-H2C2_2
ANN15952	Chr11	28578403	28582187	-	3785	0.0247659	0.254207	0	0	Similar to jockey\pol: RNA-directed DNA polymerase from mobile element jockey (Drosophila funebris OX%3D7221)	zf-C2H2
ANN15962	Chr11	28766509	28768031	-	1523	2.13656	1.12823	2.50105	1.00104	Similar to CTCF: Transcriptional repressor CTCF (Gallus gallus OX%3D9031)	zf-C2H2
ANN16212	Chr9	4900344	4927975	+	27632	0.814574	1.18208	1.12488	1.06313	Similar to ZNF850: Zinc finger protein 850 (Homo sapiens OX%3D9606)	zf-C2H2
ANN16318	Chr9	7755197	7758557	-	3361	0	0	0	0	Similar to pol: Retrovirus-related Pol polyprotein from type-2 retrotransposable element R2DM (Drosophila melanogaster OX%3D7227)	zf-C2H2
ANN16392	Chr9	9747112	9747499	+	388	3.5288	8.99779	4.46142	13.0735	Similar to Cebpg: CCAAT/enhancer-binding protein gamma (Mus musculus OX%3D10090)	TF_bZIP
ANN16412	Chr9	10299519	10299906	+	388	42.9052	87.9913	43.531	67.8788	Similar to Cebpg: CCAAT/enhancer-binding protein gamma (Mus musculus OX%3D10090)	TF_bZIP
ANN16419	Chr9	10431555	10447289	+	15735	3.86919	10.1054	4.46635	11.3772	Similar to ATFC: Activating transcription factor of chaperone (Bombyx mori OX%3D7091)	TF_bZIP
ANN16512	Chr9	12714367	12727857	+	13491	7.29004	5.72515	6.41445	5.95939	Similar to Yy1: Transcriptional repressor protein YY1 (Mus musculus OX%3D10090)	zf-H2C2_2
ANN16527	Chr9	12899873	12910925	-	11053	0.59994	0.463421	0.611943	0.490446	Similar to ZNF236: Zinc finger protein 236 (Homo sapiens OX%3D9606)	zf-C2H2
ANN16565	Chr9	13938435	13939725	-	1291	8.05766	10.3533	9.57416	7.74236	Similar to Znf652: Zinc finger protein 652 (Mus musculus OX%3D10090)	zf-C2H2
ANN16566	Chr9	13940833	13944507	-	3675	6.30512	5.9524	5.8704	4.19059	Similar to ZNF408: Zinc finger protein 408 (Homo sapiens OX%3D9606)	zf-C2H2
ANN16568	Chr9	13951918	13954052	-	2135	13.793	8.10403	12.9157	9.07584	Similar to ZNF324: Zinc finger protein 324A (Homo sapiens OX%3D9606)	zf-C2H2
ANN16569	Chr9	13954633	13956457	-	1825	10.3175	5.69766	9.39345	3.64493	Similar to znf652-b: Zinc finger protein 652-B (Xenopus laevis OX%3D8355)	zf-C2H2
ANN16570	Chr9	13957297	13958517	-	1221	2.97345	2.03544	3.03901	2.65608	Similar to ZKSCAN1: Zinc finger protein with KRAB and SCAN domains 1 (Homo sapiens OX%3D9606)	zf-H2C2_2
ANN16587	Chr9	14227335	14238519	+	11185	0.461521	0.364363	0.598616	0.775928	Similar to klhl40: Kelch-like protein 40 (Xenopus laevis OX%3D8355)	BTB
ANN16625	Chr9	15322704	15327258	-	4555	0	1.71738	0	1.08208	Similar to St18: Suppression of tumorigenicity 18 protein (Mus musculus OX%3D10090)	zf-C2HC
ANN16631	Chr9	15779909	15782084	-	2176	13.5608	17.0852	14.6661	13.458	Similar to ZNF836: Zinc finger protein 836 (Homo sapiens OX%3D9606)	zf-C2H2
ANN16756	Chr9	20098455	20103263	+	4809	0.0389827	0.216219	0.128111	1.05089	Similar to Transposable element Tcb2 transposase (Caenorhabditis briggsae OX%3D6238)	PAX
ANN16830	Chr9	22455115	22483586	+	28472	2.01924	1.99943	1.96845	1.69727	Similar to ZNF420: Zinc finger protein 420 (Homo sapiens OX%3D9606)	zf-C2H2
ANN16900	Chr9	24460394	24463312	-	2919	0.49802	4.02703	0.490539	3.15298	Similar to Nckap5l: Nck-associated protein 5-like (Mus musculus OX%3D10090)	TF_bZIP
ANN16905	Chr9	24719355	24722213	+	2859	3211.28	774.36	3072.91	789.53	Similar to Y-box factor homolog (Aplysia californica OX%3D6500)	CSD
ANN16979	Chr9	26528113	26532926	-	4814	5.43377	8.69754	7.1262	8.22532	Similar to Gastrula zinc finger protein 5-1 (Xenopus laevis OX%3D8355)	zf-C2H2
ANN16980	Chr9	26533769	26536355	-	2587	3.41166	5.0395	5.21848	3.711	Similar to Gastrula zinc finger protein xFG20-1 (Xenopus laevis OX%3D8355)	zf-C2H2
ANN16981	Chr9	26538240	26540604	-	2365	1.65332	1.0993	1.50779	0.329783	Similar to Zinc finger protein Xfin (Xenopus laevis OX%3D8355)	zf-C2H2
ANN16984	Chr9	26640794	26660127	+	19334	0.290453	0.621761	0.0810079	0.154536	Similar to ZNF471: Zinc finger protein 471 (Homo sapiens OX%3D9606)	zf-H2C2_2
ANN16987	Chr9	26811491	26839616	+	28126	0.0639396	0.258703	0.112243	0.58738	Similar to ZNF471: Zinc finger protein 471 (Homo sapiens OX%3D9606)	zf-H2C2_2
ANN16994	Chr9	26904219	26925025	+	20807	0.305644	0.619582	0.150773	0.318206	Similar to ZNF471: Zinc finger protein 471 (Homo sapiens OX%3D9606)	zf-H2C2_2
ANN17011	Chr9	27276110	27295679	-	19570	2.57168	7.26608	3.17763	6.56423	Similar to E75: Ecdysone-inducible protein E75 (Galleria mellonella OX%3D7137)	Thyroid_Hormone_Receptor-like
ANN17019	Chr9	27588885	27590942	-	2058	0.199417	0.0612192	0.130027	0.165048	Similar to dimm: Protein dimmed (Drosophila melanogaster OX%3D7227)	HLH
ANN17230	Chr10	803802	806292	+	2491	12.7536	0.539651	10.5395	0.408843	Similar to BTBD9: BTB/POZ domain-containing protein 9 (Drosophila melanogaster OX%3D7227)	BTB
ANN17291	Chr10	2134048	2136781	-	2734	3.1561	1.57098	3.67449	3.40041	Similar to Mbd2: Methyl-CpG-binding domain protein 2 (Mus musculus OX%3D10090)	MBD
ANN17355	Chr10	4090015	4091650	+	1636	2.52692	0.113067	0.932383	0.190374	Similar to BTBD9: BTB/POZ domain-containing protein 9 (Drosophila melanogaster OX%3D7227)	BTB
ANN17356	Chr10	4094352	4099442	+	5091	1.44029	0.0610594	0.66623	0.0667003	Similar to BTBD9: BTB/POZ domain-containing protein 9 (Drosophila melanogaster OX%3D7227)	BTB
ANN17360	Chr10	4153088	4165894	+	12807	0.007318	0.932991	0.0430391	0.855183	Similar to gl: Protein glass (Drosophila virilis OX%3D7244)	zf-H2C2_2
ANN17435	Chr10	6331584	6334524	-	2941	2.03074	3.88371	4.3318	3.21627	Similar to GVQW3: Protein GVQW3 (Homo sapiens OX%3D9606)	THAP
ANN17473	Chr10	7203456	7204755	+	1300	0.270488	1.17079	0.0840447	0.591015	Similar to EMX1: Homeobox protein EMX1 (Homo sapiens OX%3D9606)	Homeodomain
ANN17488	Chr10	7517672	7537202	+	19531	0.960165	1.17494	0.946803	1.00024	Similar to ZIM3: Zinc finger imprinted 3 (Homo sapiens OX%3D9606)	zf-C2H2
ANN17489	Chr10	7539712	7543584	+	3873	4.58225	4.57046	5.37563	2.98263	Similar to THAP2: THAP domain-containing protein 2 (Homo sapiens OX%3D9606)	THAP
ANN17491	Chr10	7556824	7571929	+	15106	0.578711	0.330666	0.561937	0.403725	Similar to ZNF234: Zinc finger protein 234 (Homo sapiens OX%3D9606)	zf-H2C2_2
ANN17492	Chr10	7581289	7584395	-	3107	0.60925	0.662429	0.874371	0.695325	Similar to ZNF69: Zinc finger protein 69 (Homo sapiens OX%3D9606)	zf-H2C2_2
ANN17493	Chr10	7584421	7589230	-	4810	0.0682403	0.32936	0.588075	1.1035	Similar to X-element\ORF2: Probable RNA-directed DNA polymerase from transposon X-element (Drosophila melanogaster OX%3D7227)	zf-C2H2
ANN17494	Chr10	7591159	7592972	-	1814	0.646312	0.496013	0.706711	0.692047	Similar to ZKSCAN8: Zinc finger protein with KRAB and SCAN domains 8 (Homo sapiens OX%3D9606)	zf-H2C2_2
ANN17513	Chr10	8102163	8109543	+	7381	1.94205	4.11097	2.00471	3.4859	Similar to Mblk-1: Mushroom body large-type Kenyon cell-specific protein 1 (Apis mellifera OX%3D7460)	HTH_psq
ANN17534	Chr10	8658542	8660358	+	1817	0	0	0.0535523	0	Similar to TIGD6: Tigger transposable element-derived protein 6 (Homo sapiens OX%3D9606)	HTH_psq
ANN17559	Chr10	9097863	9099028	-	1166	1.3025	5.01607	1.91008	9.8171	Similar to ttk: Protein tramtrack%2C beta isoform (Drosophila melanogaster OX%3D7227)	BTB
ANN17570	Chr10	9373650	9375770	-	2121	2.28884	2.19944	3.53043	1.68913	Similar to ttk: Protein tramtrack%2C alpha isoform (Drosophila melanogaster OX%3D7227)	zf-C2H2
ANN17571	Chr10	9380525	9394346	-	13822	0.730859	2.60124	0.719134	2.91601	Similar to ttk: Protein tramtrack%2C beta isoform (Drosophila melanogaster OX%3D7227)	BTB
ANN17604	Chr10	10109979	10111305	+	1327	0.114822	0.139415	0.110012	0.0609237	Similar to lbx1: Transcription factor LBX1 (Xenopus tropicalis OX%3D8364)	Homeodomain
ANN17605	Chr10	10113752	10116375	+	2624	0.44245	0.45714	0.129787	0.220421	Similar to lbx1: Transcription factor LBX1 (Xenopus laevis OX%3D8355)	Homeodomain
ANN17610	Chr10	10220087	10237203	+	17117	0.319744	0.334039	0.120261	0.0897233	Similar to bap: Homeobox protein bagpipe (Drosophila melanogaster OX%3D7227)	Homeodomain
ANN17630	Chr10	10616883	10617983	+	1101	0.0479074	0.420146	0.198946	0.383896	Similar to lbx1: Transcription factor LBX1 (Xenopus tropicalis OX%3D8364)	Homeodomain
ANN17631	Chr10	10620426	10621783	+	1358	0.0690599	0.613556	0	0.957289	Similar to lbx1: Transcription factor LBX1 (Xenopus laevis OX%3D8355)	Homeodomain
ANN17633	Chr10	10696938	10706271	+	9334	0.375534	0.560001	0.377455	0.311246	Similar to NKX3-2: Homeobox protein Nkx-3.2 (Homo sapiens OX%3D9606)	Homeodomain
ANN17685	Chr10	11837352	11854054	+	16703	0.723177	0.471042	0.282088	0.336591	Similar to atp6v0a1: V-type proton ATPase 116 kDa subunit a1 (Xenopus laevis OX%3D8355)	zf-C2H2
ANN17722	Chr10	13214814	13221562	+	6749	1.65999	0.301617	1.92955	0.192033	Similar to E2f3: Transcription factor E2F3 (Mus musculus OX%3D10090)	E2F_TDP
ANN17735	Chr10	13640581	13650806	+	10226	0.291204	0.0278763	0.521237	0.0527624	Similar to E2F2: Transcription factor E2F2 (Homo sapiens OX%3D9606)	E2F_TDP
ANN17759	Chr10	14797801	14805925	+	8125	0.112557	2.66906	0.0538751	2.1151	Similar to rx2: Retinal homeobox protein Rx2 (Oryzias latipes OX%3D8090)	Homeodomain
ANN17843	Chr10	17971940	17983059	+	11120	0.569777	0.216001	0.72663	0.154275	Similar to pnr: GATA-binding factor A (Drosophila melanogaster OX%3D7227)	GATA
ANN17847	Chr10	18042928	18052711	+	9784	1.74409	0.0972274	1.79261	0.202397	Similar to pnr: GATA-binding factor A (Drosophila melanogaster OX%3D7227)	GATA
ANN17871	Chr10	18622916	18627273	+	4358	18.617	1.28603	18.5911	1.45594	Similar to hb: Protein hunchback (Drosophila melanogaster OX%3D7227)	zf-H2C2_2
ANN17886	Chr10	18998359	19000311	-	1953	0.102079	0.462594	0.437423	0.584614	Similar to Homeobox protein H17 (Fragment) (Apis mellifera OX%3D7460)	Homeodomain
ANN17887	Chr10	19099593	19106076	-	6484	0.0985824	0.184325	0.0800103	0.0729341	Similar to Homeobox protein H17 (Fragment) (Apis mellifera OX%3D7460)	Homeodomain
ANN17892	Chr10	19476874	19479234	-	2361	0.565903	2.4011	0.639779	2.77984	Similar to ich: Ichor (Drosophila melanogaster OX%3D7227)	zf-C2H2
ANN17938	Chr10	20805940	20821062	-	15123	0.356427	0.82816	0.364817	0.687334	Similar to RHOBTB1: Rho-related BTB domain-containing protein 1 (Homo sapiens OX%3D9606)	BTB
ANN18134	Chr10	26683609	26687942	+	4334	0.532913	1.734	0.749006	1.68536	Similar to hmx3: Homeobox protein HMX3 (Danio rerio OX%3D7955)	Homeodomain
ANN18157	Chr10	27355190	27357218	+	2029	0.0519705	0.312147	0	0.55183	Similar to slou: Homeobox protein slou (Drosophila melanogaster OX%3D7227)	Homeodomain
ANN18223	Chr10	29025328	29035547	-	10220	0.128541	2.28086	0.116351	1.55266	Similar to ZNF845: Zinc finger protein 845 (Homo sapiens OX%3D9606)	zf-H2C2_2
ANN18296	Chr12	37310	43220	+	5911	3.22722	3.61201	2.94118	3.45059	Similar to ZFP1: Zinc finger protein 1 homolog (Pongo abelii OX%3D9601)	zf-C2H2
ANN18308	Chr12	402507	405910	-	3404	16.693	6.03667	16.6238	4.63458	Similar to Ssb-c31a: RNA polymerase II transcriptional coactivator (Drosophila melanogaster OX%3D7227)	PC4
ANN18328	Chr12	630441	638736	-	8296	2.72322	2.62647	3.11377	2.14568	Similar to ZNF160: Zinc finger protein 160 (Homo sapiens OX%3D9606)	zf-C2H2
ANN18333	Chr12	746249	760006	-	13758	2.59462	0.813316	1.59534	0.777311	Similar to BTBD9: BTB/POZ domain-containing protein 9 (Drosophila melanogaster OX%3D7227)	BTB
ANN18334	Chr12	765281	775016	-	9736	0.327392	0.227306	0.368018	0.281391	Similar to BTBD9: BTB/POZ domain-containing protein 9 (Drosophila melanogaster OX%3D7227)	BTB
ANN18338	Chr12	830861	840541	-	9681	1.94601	0.845338	2.24675	0.771148	Similar to BTBD9: BTB/POZ domain-containing protein 9 (Drosophila melanogaster OX%3D7227)	BTB
ANN18366	Chr12	1525571	1528733	-	3163	13.2193	3.0008	14.8195	3.49692	Similar to Ssb-c31a: RNA polymerase II transcriptional coactivator (Drosophila melanogaster OX%3D7227)	PC4
ANN18394	Chr12	2217294	2228185	+	10892	0.0269432	0.0652553	0.0338378	0.0419123	Similar to rx2: Retinal homeobox protein Rx2 (Danio rerio OX%3D7955)	Homeodomain
ANN18397	Chr12	2342077	2349625	+	7549	0.0590673	0.271994	0.146474	0.156151	Similar to arx: Aristaless-related homeobox protein (Danio rerio OX%3D7955)	Homeodomain
ANN18401	Chr12	2473783	2479277	+	5495	2.76293	1.75508	2.55358	1.31572	Similar to Sox4: Transcription factor SOX-4 (Mus musculus OX%3D10090)	HMG_box
ANN18405	Chr12	2654613	2659779	+	5167	1.73782	1.58729	1.37403	1.10697	Similar to ZNF846: Zinc finger protein 846 (Homo sapiens OX%3D9606)	zf-H2C2_2
ANN18425	Chr12	3126384	3133620	+	7237	0.160429	0.251645	0.110822	0.101885	Similar to Znf423: Zinc finger protein 423 (Rattus norvegicus OX%3D10116)	zf-C2H2
ANN18438	Chr12	3303622	3306535	-	2914	15.335	1.26758	25.9917	0.780962	Similar to Ssb-c31a: RNA polymerase II transcriptional coactivator (Drosophila melanogaster OX%3D7227)	PC4
ANN18520	Chr12	5142216	5149267	+	7052	0.0448852	0.112289	0.0919525	0.108882	Similar to Otp: Homeobox protein orthopedia (Lytechinus variegatus OX%3D7654)	Homeodomain
ANN18521	Chr12	5202168	5214584	+	12417	0.0117922	0.0465315	0.00896629	0.0309169	Similar to Otp: Homeobox protein orthopedia (Lytechinus variegatus OX%3D7654)	Homeodomain
ANN18562	Chr12	6452190	6460259	+	8070	0.509871	0.357293	0.611217	0.517864	Similar to ZNF510: Zinc finger protein 510 (Homo sapiens OX%3D9606)	zf-C2H2
ANN18579	Chr12	6791178	6804188	+	13011	1.8841	1.44506	1.764	1.13234	Similar to Znf250: Zinc finger protein 250 (Mus musculus OX%3D10090)	zf-C2H2
ANN18580	Chr12	6831923	6834344	+	2422	41.8895	19.0987	34.3987	11.8696	Similar to ZNF808: Zinc finger protein 808 (Homo sapiens OX%3D9606)	zf-H2C2_2
ANN18669	Chr12	9069320	9084416	-	15097	21.121	14.5019	21.1575	12.9695	Similar to ZNF782: Zinc finger protein 782 (Homo sapiens OX%3D9606)	zf-H2C2_2
ANN18684	Chr12	9406567	9415911	+	9345	4.05452	2.32862	3.83527	1.67803	Similar to BTBD9: BTB/POZ domain-containing protein 9 (Drosophila melanogaster OX%3D7227)	BTB
ANN18687	Chr12	9419965	9422786	-	2822	1.45416	0.360562	0.16014	0.0572739	Similar to ZNF271: Zinc finger protein 271 (Pongo abelii OX%3D9601)	zf-H2C2_2
ANN18701	Chr12	9901539	9915380	+	13842	2.58195	0.97176	2.61673	1.50804	Similar to thap1: THAP domain-containing protein 1 (Salmo salar OX%3D8030)	THAP
ANN18765	Chr12	11504603	11507489	+	2887	0.0406705	0.105143	0.0378289	0.027992	Similar to NR2E3: Photoreceptor-specific nuclear receptor (Homo sapiens OX%3D9606)	Retinoid_X_Receptor-like
ANN18769	Chr12	11537935	11558095	-	20161	0.0258723	0.0626133	0.0207744	0.0512097	Similar to NR2E3: Photoreceptor-specific nuclear receptor (Homo sapiens OX%3D9606)	Retinoid_X_Receptor-like
ANN18801	Chr12	12089079	12102516	-	13438	0.0575335	0.280393	0.196116	0.243945	Similar to Poxn: Paired box pox-neuro protein (Drosophila melanogaster OX%3D7227)	PAX
ANN18807	Chr12	12152640	12167671	+	15032	5.02822	0.898052	4.13536	0.733061	Similar to ZNF180: Zinc finger protein 180 (Homo sapiens OX%3D9606)	zf-H2C2_2
ANN18808	Chr12	12178051	12189663	+	11613	1.3923	0.342286	1.78059	0.384229	Similar to ZNF271: Zinc finger protein 271 (Pongo abelii OX%3D9601)	zf-H2C2_2
ANN18809	Chr12	12196765	12222391	+	25627	3.33662	1.31984	4.53261	1.06712	Similar to ZNF271: Zinc finger protein 271 (Pongo abelii OX%3D9601)	zf-H2C2_2
ANN18824	Chr12	12555085	12555667	-	583	0	0	0	0	Similar to bsh: Brain-specific homeobox protein (Drosophila melanogaster OX%3D7227)	Homeodomain
ANN18825	Chr12	12555790	12567531	-	11742	0.0918335	0.518734	0.00966501	0.137152	Similar to BSX: Brain-specific homeobox protein homolog (Gallus gallus OX%3D9031)	Homeodomain
ANN18832	Chr12	12775204	12783311	+	8108	0.0679951	0.552775	0.0674547	0.587276	Similar to BSX: Brain-specific homeobox protein homolog (Gallus gallus OX%3D9031)	Homeodomain
ANN18841	Chr12	13035955	13040017	+	4063	6.16449	3.71948	7.711	3.92821	Similar to ZNF271: Zinc finger protein 271 (Pongo abelii OX%3D9601)	zf-C2H2
ANN18855	Chr12	13631181	13643395	+	12215	5.6556	0.886103	4.87406	0.512231	Similar to F52C9.6: Putative uncharacterized transposon-derived protein F52C9.6 (Caenorhabditis elegans OX%3D6239)	BTB
ANN18866	Chr12	14014585	14018391	-	3807	5.91739	1.66476	9.68575	2.19334	Similar to BTBD9: BTB/POZ domain-containing protein 9 (Drosophila melanogaster OX%3D7227)	BTB
ANN18867	Chr12	14023334	14024777	-	1444	9.70884	2.97019	7.66132	1.47591	Similar to BTBD19: BTB/POZ domain-containing protein 19 (Bos taurus OX%3D9913)	BTB
ANN18871	Chr12	14126847	14142185	+	15339	0.215456	0.134386	0.261412	0.178065	Similar to Mef2: Myocyte-specific enhancer factor 2 (Drosophila melanogaster OX%3D7227)	SRF-TF
ANN18946	Chr12	16751420	16763075	-	11656	1.36132	5.34913	1.31398	4.00678	Similar to GUK1: Guanylate kinase (Saccharomyces cerevisiae (strain ATCC 204508 / S288c) OX%3D559292)	HTH_psq
ANN19032	Chr12	19093455	19129729	+	36275	0.425485	0.670648	0.892147	0.583959	Similar to ZNF271: Zinc finger protein 271 (Pongo abelii OX%3D9601)	zf-H2C2_2
ANN19033	Chr12	19150086	19167532	+	17447	0.554914	0.374398	0.949596	0.800336	Similar to ZNF271: Zinc finger protein 271 (Pongo abelii OX%3D9601)	zf-H2C2_2
ANN19045	Chr12	19449891	19475019	-	25129	2.29702	1.2197	1.80375	0.792278	Similar to ZNF91: Zinc finger protein 91 (Homo sapiens OX%3D9606)	zf-H2C2_2
ANN19047	Chr12	19480622	19488651	-	8030	0.394025	0.190433	1.18448	1.12034	Similar to ZNF180: Zinc finger protein 180 (Homo sapiens OX%3D9606)	zf-H2C2_2
ANN19048	Chr12	19497163	19509993	-	12831	2.12002	1.58186	1.41346	0.955103	Similar to ZNF850: Zinc finger protein 850 (Homo sapiens OX%3D9606)	zf-H2C2_2
ANN19053	Chr12	19696286	19698170	+	1885	1.7539	3.00989	3.70407	3.39472	Similar to ZNF235: Zinc finger protein 235 (Homo sapiens OX%3D9606)	zf-H2C2_2
ANN19054	Chr12	19706764	19708043	+	1280	2.02489	0.957898	2.24507	2.84625	Similar to ZNF233: Zinc finger protein 233 (Homo sapiens OX%3D9606)	zf-H2C2_2
ANN19055	Chr12	19708072	19709163	+	1092	2.33253	0.874882	0.604803	1.85349	Similar to ZNF227: Zinc finger protein 227 (Bos taurus OX%3D9913)	zf-H2C2_2
ANN19058	Chr12	19751672	19753080	-	1409	0	0	0	0	Similar to Kr: Protein krueppel (Fragment) (Tribolium castaneum OX%3D7070)	zf-C2H2
ANN19059	Chr12	19753663	19758815	-	5153	2.07057	0.991243	4.26064	4.22336	Similar to ZNF271: Zinc finger protein 271 (Pongo abelii OX%3D9601)	zf-H2C2_2
ANN19061	Chr12	19814166	19876680	-	62515	0.267363	0.275536	0.41112	0.334444	Similar to ZNF721: Zinc finger protein 721 (Homo sapiens OX%3D9606)	zf-H2C2_2
ANN19062	Chr12	19886873	19889207	-	2335	0.286068	0.310961	0.356347	0	Similar to ZNF227: Zinc finger protein 227 (Bos taurus OX%3D9913)	zf-H2C2_2
ANN19066	Chr12	19906273	19907612	-	1340	0.227635	0.701575	0.359605	0.265772	Similar to ZNF271: Zinc finger protein 271 (Pongo abelii OX%3D9601)	zf-H2C2_2
ANN19067	Chr12	19907637	19909813	-	2177	0.0430672	0	0	0.0742508	Similar to ZNF271: Zinc finger protein 271 (Pongo abelii OX%3D9601)	zf-H2C2_2
ANN19080	Chr12	20140502	20154668	+	14167	0.856499	0.4896	0.275629	0.200268	Similar to ZNF721: Zinc finger protein 721 (Homo sapiens OX%3D9606)	zf-H2C2_2
ANN19081	Chr12	20154697	20155454	+	758	1.59518	0.884877	1.59463	1.77826	Similar to ZNF271: Zinc finger protein 271 (Pongo abelii OX%3D9601)	zf-H2C2_2
ANN19082	Chr12	20166639	20170280	+	3642	0.612853	0.768272	0.236873	0.085488	Similar to ZNF98: Zinc finger protein 98 (Homo sapiens OX%3D9606)	zf-H2C2_2
ANN19083	Chr12	20170310	20171195	+	886	0	0	0.0616803	0	Similar to ZNF233: Zinc finger protein 233 (Homo sapiens OX%3D9606)	zf-H2C2_2
ANN19084	Chr12	20171309	20171978	+	670	0.0877244	0.110649	0.381241	0.519711	Similar to Znf583: Zinc finger protein 583 (Mus musculus OX%3D10090)	zf-H2C2_2
ANN19085	Chr12	20172573	20173980	+	1408	3.15623	3.31401	1.94205	1.30688	Similar to ZNF600: Zinc finger protein 600 (Homo sapiens OX%3D9606)	zf-C2H2
ANN19090	Chr12	20188438	20213058	+	24621	1.02248	0.989804	0.6612	0.831275	Similar to ZNF208: Zinc finger protein 208 (Homo sapiens OX%3D9606)	zf-H2C2_2
ANN19091	Chr12	20213843	20214767	+	925	3.56333	2.13466	0.78197	0.336864	Similar to Znf271: Zinc finger protein 271 (Mus musculus OX%3D10090)	zf-H2C2_2
ANN19094	Chr12	20236260	20239320	+	3061	0.915023	0.831917	0.36823	0.0581486	Similar to ZNF721: Zinc finger protein 721 (Homo sapiens OX%3D9606)	zf-H2C2_2
ANN19100	Chr12	20254329	20256664	+	2336	0.381359	0.237513	0.39458	0.264684	Similar to ZNF227: Zinc finger protein 227 (Bos taurus OX%3D9913)	zf-H2C2_2
ANN19101	Chr12	20266207	20267295	+	1089	1.01867	0.544225	0.737499	0.687423	Similar to ZNF227: Zinc finger protein 227 (Bos taurus OX%3D9913)	zf-C2H2
ANN19102	Chr12	20273815	20279406	+	5592	0	0.0715263	0.0376905	0.155753	Similar to ZNF235: Zinc finger protein 235 (Homo sapiens OX%3D9606)	zf-H2C2_2
ANN19103	Chr12	20279460	20280888	+	1429	0.0328131	1.01601	0.151743	0.056572	Similar to ZNF271: Zinc finger protein 271 (Pongo abelii OX%3D9601)	zf-H2C2_2
ANN19105	Chr12	20295737	20299046	+	3310	2.6699	2.60292	5.25061	8.69503	Similar to ZNF721: Zinc finger protein 721 (Homo sapiens OX%3D9606)	zf-H2C2_2
ANN19107	Chr12	20332643	20334935	+	2293	1.47247	0.558799	2.12909	2.8474	Similar to ZNF420: Zinc finger protein 420 (Bos taurus OX%3D9913)	zf-H2C2_2
ANN19108	Chr12	20342796	20344797	+	2002	0.404315	0.723055	0.274949	0.191836	Similar to ZNF235: Zinc finger protein 235 (Homo sapiens OX%3D9606)	zf-H2C2_2
ANN19124	Chr12	20878884	20899477	+	20594	6.88926	3.2205	10.3327	3.12041	Similar to BTBD9: BTB/POZ domain-containing protein 9 (Drosophila melanogaster OX%3D7227)	BTB
ANN19137	Chr12	21214411	21218989	-	4579	22.0287	14.3145	13.8115	5.92662	Similar to BTBD9: BTB/POZ domain-containing protein 9 (Drosophila melanogaster OX%3D7227)	BTB
ANN19158	Chr12	21580167	21587340	+	7174	0.413307	0.3493	0.42512	0.193505	Similar to myb: Transcriptional activator Myb (Xenopus laevis OX%3D8355)	Myb_DNA-binding
ANN19171	Chr12	21746746	21749216	-	2471	11.559	3.82251	9.84194	1.52764	Similar to Zfp26: Zinc finger protein 26 (Mus musculus OX%3D10090)	zf-H2C2_2
ANN19172	Chr12	21756094	21759000	-	2907	1.12566	0.929637	1.0151	0.162709	Similar to Oocyte zinc finger protein XlCOF6 (Fragment) (Xenopus laevis OX%3D8355)	zf-H2C2_2
ANN19173	Chr12	21772031	21775352	-	3322	0.391466	0.257367	0.354081	0.0401467	Similar to Zfp26: Zinc finger protein 26 (Mus musculus OX%3D10090)	zf-H2C2_2
ANN19175	Chr12	21789452	21792578	-	3127	1.49431	1.68046	0.804508	0.820809	Similar to Oocyte zinc finger protein XlCOF6 (Fragment) (Xenopus laevis OX%3D8355)	zf-H2C2_2
ANN19176	Chr12	21800593	21803494	-	2902	1.85473	1.33186	1.22592	0.409605	Similar to ZNF850: Zinc finger protein 850 (Homo sapiens OX%3D9606)	zf-H2C2_2
ANN19177	Chr12	21812864	21816341	-	3478	0.561468	0.162887	0.801172	0.257928	Similar to ZNF271: Zinc finger protein 271 (Pongo abelii OX%3D9601)	zf-H2C2_2
ANN19186	Chr12	21903221	21905625	-	2405	27.8499	18.4263	27.0936	19.5646	Similar to Zfp26: Zinc finger protein 26 (Mus musculus OX%3D10090)	zf-C2H2
ANN19197	Chr12	22073017	22074601	+	1585	28.234	5.36761	28.9196	3.59457	Similar to Zfp26: Zinc finger protein 26 (Mus musculus OX%3D10090)	zf-C2H2
ANN19206	Chr12	22589165	22599084	-	9920	0.0200736	0.0611844	0.103677	0.0319791	Similar to Transposable element Tcb2 transposase (Caenorhabditis briggsae OX%3D6238)	PAX
ANN19214	Chr12	22752997	22754458	-	1462	37.384	11.3722	38.3211	10.7543	Similar to BTBD9: BTB/POZ domain-containing protein 9 (Homo sapiens OX%3D9606)	BTB
ANN19215	Chr12	22754756	22756232	-	1477	6.78944	2.39214	8.43455	3.11182	Similar to BTBD9: BTB/POZ domain-containing protein 9 (Homo sapiens OX%3D9606)	BTB
ANN19246	Chr12	23248030	23249506	+	1477	11.4794	5.73311	11.8819	1.4471	Similar to BTBD9: BTB/POZ domain-containing protein 9 (Homo sapiens OX%3D9606)	BTB
ANN19247	Chr12	23249650	23250656	+	1007	19.7421	7.66164	16.8394	2.28801	Similar to BTBD9: BTB/POZ domain-containing protein 9 (Homo sapiens OX%3D9606)	BTB
ANN19322	ChrX	700930	702827	+	1898	2.05814	5.30704	1.19098	3.55748	Similar to twist1: Twist-related protein (Xenopus laevis OX%3D8355)	HLH
ANN19362	ChrX	1645379	1648346	-	2968	5.10538	4.20185	5.66484	5.00984	Similar to ztf-16: Zinc finger protein ztf-16 (Caenorhabditis elegans OX%3D6239)	zf-H2C2_2
ANN19365	ChrX	1719568	1720183	+	616	1.18209	2.48564	2.79154	1.44582	Similar to tx: Helix-loop-helix protein delilah (Drosophila melanogaster OX%3D7227)	HLH
ANN19381	ChrX	2223515	2246515	+	23001	0.387784	0.0777304	0.378633	0.082748	Similar to Hr4: Hormone receptor 4 (Drosophila melanogaster OX%3D7227)	Germ_Cell_Nuclear_Factor-like
ANN19394	ChrX	2618760	2630584	-	11825	1.30912	3.97894	1.27761	4.01834	Similar to Onecut1: Hepatocyte nuclear factor 6 (Mus musculus OX%3D10090)	CUT
ANN19426	ChrX	3550888	3554907	+	4020	0.128364	1.12501	0.0896776	0.893964	Similar to Nhlh1: Helix-loop-helix protein 1 (Mus musculus OX%3D10090)	HLH
ANN19435	ChrX	3905116	3911631	+	6516	2.78365	2.18505	2.40292	2.01252	Similar to tfap2e: Transcription factor AP-2-epsilon (Xenopus laevis OX%3D8355)	TF_AP-2
ANN19461	ChrX	4764493	4765758	+	1266	0.0927867	0.664297	0	0.404153	Similar to vsx1: Visual system homeobox 1 (Danio rerio OX%3D7955)	Homeodomain
ANN19484	ChrX	5881900	5906458	-	24559	0.0171911	0.0449114	0.0762141	0.0554811	Similar to Atf3: Activating transcription factor 3 (Drosophila melanogaster OX%3D7227)	TF_bZIP
ANN19485	ChrX	5946319	5950783	-	4465	4.28366	2.86721	4.91773	2.18987	Similar to PLAG1: Zinc finger protein PLAG1 (Gallus gallus OX%3D9031)	zf-C2H2
ANN19493	ChrX	6149274	6164024	-	14751	0.012707	0.292058	0.062689	0.51282	Similar to RAP1GAP: Rap1 GTPase-activating protein 1 (Homo sapiens OX%3D9606)	BTB
ANN19503	ChrX	6402876	6425946	-	23071	0.0888905	1.09606	0.125627	0.925669	Similar to Sipa1l1: Signal-induced proliferation-associated 1-like protein 1 (Mus musculus OX%3D10090)	BTB
ANN19521	ChrX	6873276	6876485	+	3210	24.5468	15.4892	16.5909	10.2034	Similar to Atf2: Cyclic AMP-dependent transcription factor ATF-2 (Mus musculus OX%3D10090)	TF_bZIP
ANN19535	ChrX	7124610	7133749	-	9140	2.42361	2.68673	2.31264	2.05655	Similar to lolal: Longitudinals lacking protein-like (Drosophila melanogaster OX%3D7227)	BTB
ANN19563	ChrX	7753511	7765573	+	12063	7.52965	0.614621	5.92816	0.776626	Similar to Mnx1: Motor neuron and pancreas homeobox protein 1 (Mus musculus OX%3D10090)	Homeodomain
ANN19640	ChrX	9548018	9549983	+	1966	0.0597329	2.79118	0	3.92441	Similar to BARHL1: BarH-like 1 homeobox protein (Homo sapiens OX%3D9606)	Homeodomain
ANN19645	ChrX	9684317	9687223	-	2907	0.407184	16.2457	0.599152	14.0616	Similar to BCL11A: B-cell lymphoma/leukemia 11A (Homo sapiens OX%3D9606)	zf-C2H2
ANN19653	ChrX	9981833	9991261	-	9429	0.0410326	1.10685	0.218275	0.775121	Similar to ptf1a: Pancreas transcription factor 1 subunit alpha (Xenopus laevis OX%3D8355)	HLH
ANN19656	ChrX	10043996	10046783	+	2788	2.06417	10.2723	1.95233	8.81377	Similar to PRDM1: PR domain zinc finger protein 1 (Homo sapiens OX%3D9606)	zf-H2C2_2
ANN19663	ChrX	10291613	10298198	-	6586	0.357685	0.811945	0.28363	0.676875	Similar to SIX3: Homeobox protein SIX3 (Homo sapiens OX%3D9606)	Homeodomain
ANN19677	ChrX	10597307	10601311	+	4005	0.0394841	0.31342	0	0.313357	Similar to eve: Segmentation protein even-skipped (Drosophila melanogaster OX%3D7227)	Homeodomain
ANN19682	ChrX	10675825	10680771	+	4947	0.0426788	0.229768	0.0335448	0.158531	Similar to eve: Segmentation protein even-skipped (Drosophila melanogaster OX%3D7227)	Homeodomain
ANN19685	ChrX	10728665	10739760	+	11096	0.330169	0.155524	0.619589	0.155882	Similar to nkx2.2a: Homeobox protein Nkx-2.2a (Danio rerio OX%3D7955)	Homeodomain
ANN19689	ChrX	10840636	10847884	+	7249	20.9382	2.79037	19.3687	2.62964	Similar to SIM1: Single-minded homolog 1 (Homo sapiens OX%3D9606)	HLH
ANN19694	ChrX	10914516	10918930	+	4415	0.698074	3.16084	1.20906	2.23943	Similar to PLEC: Plectin (Fragment) (Cricetulus griseus OX%3D10029)	PAX
ANN19702	ChrX	11089081	11105264	-	16184	3.25367	4.58496	3.05717	3.81959	Similar to br: Broad-complex core protein isoform 6 (Drosophila melanogaster OX%3D7227)	BTB
ANN19718	ChrX	11485109	11492114	+	7006	2.86351	3.44703	3.38832	3.29499	Similar to KLHL5: Kelch-like protein 5 (Homo sapiens OX%3D9606)	BTB
ANN19723	ChrX	12143990	12159227	-	15238	5.56561	1.20298	5.25483	0.902156	Similar to ovo: Transcriptional regulator ovo (Drosophila melanogaster OX%3D7227)	zf-H2C2_2
ANN19732	ChrX	12708088	12724919	-	16832	0.0188037	0.165325	0.0319797	0.269785	Similar to PAX6: Paired box protein Pax-6 (Coturnix japonica OX%3D93934)	PAX
ANN19784	ChrX	14692862	14696714	+	3853	4.30864	0	3.10903	0	Similar to byn: T-related protein (Drosophila melanogaster OX%3D7227)	T-box
ANN19803	ChrX	15492916	15508726	-	15811	7.30614	1.0773	8.18004	0.770579	Similar to Rreb1: Ras-responsive element-binding protein 1 (Mus musculus OX%3D10090)	zf-C2H2
ANN19852	ChrX	17477066	17489719	+	12654	9.36942	0.353385	7.82671	0.394904	Similar to sox17a-a: Transcription factor Sox-17-alpha-A (Xenopus laevis OX%3D8355)	HMG_box
ANN19878	ChrX	18570151	18588135	+	17985	3.83243	7.19961	4.4319	6.48914	Similar to Cic: Protein capicua homolog (Mus musculus OX%3D10090)	HMG_box
ANN19882	ChrX	18764761	18776805	+	12045	1.29118	7.3975	1.7801	7.03022	Similar to Hr3: Probable nuclear hormone receptor HR3 (Drosophila melanogaster OX%3D7227)	Thyroid_Hormone_Receptor-like
ANN19895	ChrX	19104478	19110385	+	5908	0	0.112718	0	0.0225711	Similar to AHRR: Aryl hydrocarbon receptor repressor (Homo sapiens OX%3D9606)	HLH
ANN19910	ChrX	19432091	19435018	-	2928	14.3429	21.9421	20.3215	21.9705	Similar to exd: Homeobox protein extradenticle (Anopheles gambiae OX%3D7165)	Homeodomain
ANN19913	ChrX	19489839	19496510	+	6672	0.287993	3.40182	0.131394	3.05239	Similar to hlh-13: Helix-loop-helix protein 13 (Caenorhabditis elegans OX%3D6239)	HLH
ANN19916	ChrX	19577252	19582774	+	5523	8.33258	1.91207	9.9541	2.28915	Similar to dbx1a: Homeobox protein DBX1-A (Danio rerio OX%3D7955)	Homeodomain
ANN19957	ChrX	20549172	20550139	-	968	9.62934	11.5201	9.18099	12.9153	Similar to bs: Serum response factor homolog (Drosophila melanogaster OX%3D7227)	SRF-TF
ANN19958	ChrX	20556682	20557785	-	1104	9.66879	18.7305	8.92576	22.3874	Similar to bs: Serum response factor homolog (Drosophila melanogaster OX%3D7227)	SRF-TF
