# Supplementary material for: Insights into Bactericera cockerelli and Candidatus Liberibacter solanacearum interaction: a tissue-specific transcriptomic approach
Source: Front Plant Sci. 2024 Aug 30;15:1393994. doi: 10.3389/fpls.2024.1393994 (PMC11392735; doi:10.3389/fpls.2024.1393994)
Supplement: Supplementary file 5 [file DataSheet5.xlsx]

## Sheet: Sheet 1
Supplementary Table 5. differentially expressed genes between the ovaries and salivary glands n CLso(-) and CLso(+) conditions.
Ovaries/Salivary glands CLso(-)												Ovaries/Salivary glands CLso(+)
			Read counts (normalized)												Read counts (normalized)
Gene ID	log2fold-change	p-adj	CLso(-) Salivary glands Rep 1	CLso(-) Salivary glands Rep 2	CLso(-) Salivary glands Rep 3	CLso(-) Ovaries Rep 1	CLso(-) Ovaries Rep 2	CLso(-) Ovaries Rep 3	Regulation	Annotation		Gene ID	log2fold-change	p-adj	CLso(+) Salivary glands Rep 1	CLso(+) Salivary glands Rep 2	CLso(+) Salivary glands Rep 3	CLso(+) Ovaries Rep 1	CLso(+) Ovaries Rep 2	CLso(+) Ovaries Rep 3	Regulation	Annotation
ANN00026	1.69686	0.0165886	8.68286	14.4207	9.26226	56.2751	26.5775	23.4958	up	Protein of unknown function		ANN00191	2.71223	0.00108071	6.70507	15.2314	2.92231	86.0672	14.7597	63.559	up	Protein of unknown function
ANN00066	5.00154	0.0195672	0	0	0	15.4481	1.99331	3.2408	up	Protein of unknown function		ANN00307	1.23317	9.45168e-05	87.1658	85.0419	75.9802	145.039	217.37	221.642	up	Similar to mars1: Methionine--tRNA ligase%2C cytoplasmic (Xenopus laevis OX%3D8355)
ANN00410	4.62634	0.0390802	0	0	0	2.20687	5.3155	8.102	up	Protein of unknown function		ANN00308	1.23169	0.00917834	25.7028	45.6942	23.3785	78.098	65.0768	79.8562	up	Similar to Ddx28: Probable ATP-dependent RNA helicase DDX28 (Mus musculus OX%3D10090)
ANN00430	4.85447	0.0232246	0	0	0	4.41373	2.65775	11.3428	up	Similar to LWamide neuropeptides (Hydractinia echinata OX%3D35630)		ANN00420	2.76833	0.000857764	2.23502	5.07713	14.6116	79.6918	20.1268	45.6321	up	Similar to PGBD3: PiggyBac transposable element-derived protein 3 (Homo sapiens OX%3D9606)
ANN00534	1.66039	1.10658e-08	88.7581	81.3742	67.9233	262.617	243.184	251.162	up	Similar to PUS10: tRNA pseudouridine synthase Pus10 (Homo sapiens OX%3D9606)		ANN00473	4.80265	0.0298642	0	0	0	4.78151	2.68358	12.2229	up	Protein of unknown function
ANN00588	6.25364	0.000248817	0	0	0	34.2064	9.96656	4.8612	up	Protein of unknown function		ANN00493	2.97621	0.0231495	2.23502	0	11.6893	1.59384	64.4059	40.7429	up	Similar to RTase: Probable RNA-directed DNA polymerase from transposon BS (Drosophila melanogaster OX%3D7227)
ANN00604	5.62716	0.00162877	0	0	0	17.6549	5.97993	8.102	up	Protein of unknown function		ANN00534	1.34722	1.14853e-05	77.1083	118.043	73.0579	200.027	229.446	253.421	up	Similar to PUS10: tRNA pseudouridine synthase Pus10 (Homo sapiens OX%3D9606)
ANN00605	6.27997	8.56647e-05	0	0	0	22.0687	18.6042	8.91219	up	Protein of unknown function		ANN00572	3.67165	0.0324093	0	2.53856	0	14.3445	6.70894	11.408	up	Protein of unknown function
ANN00608	4.92712	0.0166234	0	0	0	4.41373	9.96656	4.8612	up	Protein of unknown function		ANN00573	3.65785	0.0316136	3.35253	0	0	33.4706	2.01268	9.77831	up	Protein of unknown function
ANN00612	4.09831	0.000480365	0	4.12021	0	13.2412	27.9064	34.0284	up	Similar to GTF2IRD2: General transcription factor II-I repeat domain-containing protein 2A (Homo sapiens OX%3D9606)		ANN00604	5.30172	0.0057403	0	0	0	4.78151	10.7343	12.2229	up	Protein of unknown function
ANN00616	3.54625	3.29441e-05	3.85905	0	6.17484	46.3442	34.5507	29.1672	up	Similar to RTase: Probable RNA-directed DNA polymerase from transposon BS (Drosophila melanogaster OX%3D7227)		ANN00605	6.10219	0.000249224	0	0	0	9.56302	12.747	26.0755	up	Protein of unknown function
ANN00623	2.0101	1.77526e-09	128.313	265.754	138.934	791.161	607.96	753.486	up	Similar to snu13: NHP2-like protein 1 (Xenopus laevis OX%3D8355)		ANN00607	5.57598	0.00175508	0	0	0	11.1569	9.39252	13.0377	up	Protein of unknown function
ANN00641	1.33371	7.06775e-06	174.622	240.002	134.303	459.028	449.824	480.448	up	Similar to cops2: COP9 signalosome complex subunit 2 (Danio rerio OX%3D7955)		ANN00612	2.01588	0.0235054	4.47004	5.07713	5.84463	24.7045	16.1015	21.1863	up	Similar to GTF2IRD2: General transcription factor II-I repeat domain-containing protein 2A (Homo sapiens OX%3D9606)
ANN00646	1.64695	4.6037e-05	66.5686	55.6229	30.8742	197.514	122.921	166.091	up	Similar to GTF2H4: General transcription factor IIH subunit 4 (Pan troglodytes OX%3D9598)		ANN00613	4.67041	0.0361952	0	0	0	3.18767	7.37984	7.33373	up	Protein of unknown function
ANN00652	2.442	0.0201591	1.92952	6.18032	1.54371	11.0343	27.9064	14.5836	up	Protein of unknown function		ANN00616	3.88789	0.00042323	2.23502	2.53856	0	28.6891	25.494	19.5566	up	Similar to RTase: Probable RNA-directed DNA polymerase from transposon BS (Drosophila melanogaster OX%3D7227)
ANN00654	5.53207	1.16245e-13	0	4.12021	3.08742	119.171	114.948	83.4506	up	Similar to PGBD4: PiggyBac transposable element-derived protein 4 (Homo sapiens OX%3D9606)		ANN00623	1.26984	7.34239e-09	308.433	255.126	299.537	569.797	729.262	782.264	up	Similar to snu13: NHP2-like protein 1 (Xenopus laevis OX%3D8355)
ANN00669	3.91867	0.0180704	0	0	3.08742	22.0687	13.2887	3.2408	up	Similar to CCDC81: Coiled-coil domain-containing protein 81 (Homo sapiens OX%3D9606)		ANN00641	1.12679	1.33994e-07	215.68	196.739	178.261	443.087	421.322	427.801	up	Similar to cops2: COP9 signalosome complex subunit 2 (Danio rerio OX%3D7955)
ANN00672	3.51247	0.000393494	3.85905	2.06011	0	29.7927	18.6042	25.9264	up	Protein of unknown function		ANN00646	1.71376	2.54213e-06	63.6981	40.617	42.3736	126.71	199.256	157.268	up	Similar to GTF2H4: General transcription factor IIH subunit 4 (Pan troglodytes OX%3D9598)
ANN00674	1.5081	0.0424394	15.4362	6.18032	12.3497	49.6545	27.2419	20.255	up	Protein of unknown function		ANN00654	5.04326	7.29349e-10	6.70507	0	0	94.0364	88.5581	60.2996	up	Similar to PGBD4: PiggyBac transposable element-derived protein 4 (Homo sapiens OX%3D9606)
ANN00755	2.96331	0.00131721	7.7181	2.06011	0	24.2755	30.5641	27.5468	up	Protein of unknown function		ANN00669	4.66949	0.00294766	0	0	2.92231	19.126	44.279	4.07429	up	Similar to CCDC81: Coiled-coil domain-containing protein 81 (Homo sapiens OX%3D9606)
ANN00795	3.22312	1.42298e-20	26.0486	52.5327	35.5053	401.65	293.681	371.882	up	Similar to nesd: Protein nessun dorma (Drosophila melanogaster OX%3D7227)		ANN00674	5.95613	1.09692e-06	2.23502	0	0	54.1905	48.9753	52.151	up	Protein of unknown function
ANN00835	5.27552	0.00568891	0	0	0	4.41373	11.9599	8.102	up	Protein of unknown function		ANN00755	4.86819	0.000495733	0	0	2.92231	17.5322	40.9246	17.9269	up	Protein of unknown function
ANN00872	1.02611	0.00417186	54.9914	78.2841	81.8166	155.584	154.814	125.581	up	Similar to Ddx28: Probable ATP-dependent RNA helicase DDX28 (Mus musculus OX%3D10090)		ANN00758	2.64974	0.0278664	2.23502	2.53856	2.92231	30.2829	8.05073	9.77831	up	Protein of unknown function
ANN00876	1.57756	1.83712e-05	124.454	123.606	60.2047	377.374	314.279	236.578	up	Protein of unknown function		ANN00795	4.99584	6.87556e-35	5.58755	15.2314	8.76694	318.767	321.358	294.164	up	Similar to nesd: Protein nessun dorma (Drosophila melanogaster OX%3D7227)
ANN00877	1.65448	4.32836e-09	111.912	118.456	94.1663	397.236	318.265	311.117	up	Similar to Polr2e: DNA-directed RNA polymerases I%2C II%2C and III subunit RPABC1 (Rattus norvegicus OX%3D10116)		ANN00825	3.42494	0.00999515	4.47004	0	0	19.126	19.4559	13.0377	up	Similar to X-element\ORF2: Probable RNA-directed DNA polymerase from transposon X-element (Drosophila melanogaster OX%3D7227)
ANN00894	1.02157	0.000753089	151.468	103.005	157.458	275.858	281.721	276.278	up	Similar to CASP2: Caspase-2 (Gallus gallus OX%3D9031)		ANN00845	2.02149	0.0326637	2.23502	2.53856	14.6116	24.7045	21.4686	30.1498	up	Similar to RTase: Probable RNA-directed DNA polymerase from transposon BS (Drosophila melanogaster OX%3D7227)
ANN00926	2.14997	1.02239e-05	22.1895	14.4207	12.3497	81.654	77.7392	61.5752	up	Similar to dib: Cytochrome P450 302a1%2C mitochondrial (Drosophila melanogaster OX%3D7227)		ANN00871	1.08657	0.00016193	111.751	95.1962	80.3636	225.528	194.559	192.307	up	Similar to MARS1: Methionine--tRNA ligase%2C cytoplasmic (Homo sapiens OX%3D9606)
ANN00943	1.11303	0.0124303	39.5552	43.2622	24.6994	84.9643	69.7659	81.02	up	Similar to USB1: U6 snRNA phosphodiesterase (Bos taurus OX%3D9913)		ANN00876	1.5862	1.01341e-08	97.2234	115.505	71.5967	261.389	307.941	286.83	up	Protein of unknown function
ANN00996	1.72332	6.88158e-14	312.583	359.489	389.015	1087.98	1289.67	1119.7	up	Similar to MDH1: Malate dehydrogenase%2C cytoplasmic (Homo sapiens OX%3D9606)		ANN00877	1.98468	7.41751e-13	62.5806	101.543	77.4413	304.423	349.536	299.868	up	Similar to Polr2e: DNA-directed RNA polymerases I%2C II%2C and III subunit RPABC1 (Rattus norvegicus OX%3D10116)
ANN01004	1.23791	0.0408961	21.2248	21.6311	18.5245	24.2755	58.4705	61.5752	up	Similar to Enhancer of rudimentary homolog (Aedes aegypti OX%3D7159)		ANN00894	1.31249	3.32249e-07	176.567	178.969	127.121	331.518	442.119	427.801	up	Similar to CASP2: Caspase-2 (Gallus gallus OX%3D9031)
ANN01031	4.1066	0.0460295	0.964762	0	0	8.82746	1.32887	11.3428	up	Similar to K02A2.6: Uncharacterized protein K02A2.6 (Caenorhabditis elegans OX%3D6239)		ANN00915	1.05653	2.38698e-06	253.675	224.663	248.397	438.305	587.033	485.656	up	Similar to Tpr: Nucleoprotein TPR (Rattus norvegicus OX%3D10116)
ANN01047	3.78914	2.51358e-30	32.8019	33.9918	33.9616	609.095	408.629	375.933	up	Similar to CG5065: Putative fatty acyl-CoA reductase CG5065 (Drosophila melanogaster OX%3D7227)		ANN00926	1.73884	0.000351536	26.8203	19.0392	40.9124	59.7689	115.394	112.451	up	Similar to dib: Cytochrome P450 302a1%2C mitochondrial (Drosophila melanogaster OX%3D7227)
ANN01048	1.40639	0.00700101	15.4362	33.9918	30.8742	93.7918	55.1483	63.1956	up	Similar to Togaram1: TOG array regulator of axonemal microtubules protein 1 (Mus musculus OX%3D10090)		ANN00996	2.37651	4.55669e-30	181.037	152.314	211.868	1029.62	860.758	936.273	up	Similar to MDH1: Malate dehydrogenase%2C cytoplasmic (Homo sapiens OX%3D9606)
ANN01072	1.5878	4.83497e-10	236.367	327.557	311.829	776.817	866.426	985.203	up	Similar to MDH1: Malate dehydrogenase%2C cytoplasmic (Homo sapiens OX%3D9606)		ANN00997	1.82791	0.000818168	20.1152	19.0392	8.76694	62.1596	61.0514	48.8915	up	Similar to frtz: WD repeat-containing and planar cell polarity effector protein fritz (Drosophila melanogaster OX%3D7227)
ANN01077	1.99198	0.000104732	18.3305	19.571	64.8358	135.722	116.277	145.836	up	Protein of unknown function		ANN01023	1.02763	0.0404627	24.5852	38.0785	26.3008	47.0182	65.7477	68.4481	up	Similar to rbm42: RNA-binding protein 42 (Danio rerio OX%3D7955)
ANN01078	2.24531	0.00782066	3.85905	6.18032	4.63113	28.6893	14.6176	26.7366	up	Similar to DDB2: DNA damage-binding protein 2 (Gallus gallus OX%3D9031)		ANN01039	5.50455	0.0022884	0	0	0	11.1569	9.39252	11.408	up	Protein of unknown function
ANN01082	1.02772	0.00027086	138.926	128.757	123.497	243.859	257.137	297.343	up	Similar to Usp5: Ubiquitin carboxyl-terminal hydrolase 5 (Mus musculus OX%3D10090)		ANN01044	3.52457	0.0208449	3.35253	0	0	8.7661	10.0634	22.816	up	Protein of unknown function
ANN01090	2.15096	1.21301e-14	5868.65	7815.02	7996.42	42414.9	23667.9	30200.2	up	Similar to rpl27: 60S ribosomal protein L27 (Danio rerio OX%3D7955)		ANN01046	1.3251	2.36743e-05	183.272	140.89	92.0529	310.798	307.27	429.431	up	Similar to Tret1: Facilitated trehalose transporter Tret1 (Polypedilum vanderplanki OX%3D319348)
ANN01095	1.32935	0.000118601	92.6171	92.7048	52.4861	191.997	190.029	221.184	up	Similar to Sf3b4: Splicing factor 3B subunit 4 (Rattus norvegicus OX%3D10116)		ANN01047	4.13355	6.07838e-42	22.3502	17.77	30.6843	426.351	401.866	402.54	up	Similar to CG5065: Putative fatty acyl-CoA reductase CG5065 (Drosophila melanogaster OX%3D7227)
ANN01097	1.68417	1.27517e-10	157.256	194.68	165.177	649.922	502.315	512.046	up	Similar to SFMBT2: Scm-like with four MBT domains protein 2 (Homo sapiens OX%3D9606)		ANN01048	1.48755	0.0136715	14.5276	11.4235	36.5289	71.7227	48.3044	52.9658	up	Similar to Togaram1: TOG array regulator of axonemal microtubules protein 1 (Mus musculus OX%3D10090)
ANN01112	1.33115	9.59475e-08	1036.15	1399.84	1333.77	3729.6	2668.38	3086.05	up	Similar to PSMD12: 26S proteasome non-ATPase regulatory subunit 12 (Pongo abelii OX%3D9601)		ANN01060	4.6033	0.044925	0	0	0	9.56302	2.68358	4.88915	up	Protein of unknown function
ANN01119	1.61425	6.03057e-06	79.1105	54.5928	43.2239	158.894	194.68	192.827	up	Similar to Aggf1: Angiogenic factor with G patch and FHA domains 1 (Mus musculus OX%3D10090)		ANN01072	1.46925	7.70495e-13	255.91	332.552	251.319	773.011	819.833	732.558	up	Similar to MDH1: Malate dehydrogenase%2C cytoplasmic (Homo sapiens OX%3D9606)
ANN01120	2.67187	6.41447e-36	12013.2	12763.4	11594.8	91053.1	67987.9	72743.8	up	Similar to Heat shock 70 kDa protein cognate 4 (Manduca sexta OX%3D7130)		ANN01077	1.32552	0.00135719	58.1106	38.0785	39.4512	138.664	122.774	79.8562	up	Protein of unknown function
ANN01121	1.92638	1.44795e-18	3681.53	3854.46	4317.76	14876.5	12879.5	17294.5	up	Similar to Heat shock 70 kDa protein cognate 4 (Manduca sexta OX%3D7130)		ANN01083	1.14912	1.48303e-07	537.523	505.174	455.881	1320.49	870.821	1135.1	up	Similar to STIP1: Stress-induced-phosphoprotein 1 (Macaca fascicularis OX%3D9541)
ANN01129	3.02185	0.00569236	3.85905	2.06011	0	17.6549	15.2821	19.4448	up	Similar to tbc1d31: TBC1 domain family member 31 (Xenopus tropicalis OX%3D8364)		ANN01088	2.07842	0.00609551	14.5276	2.53856	14.6116	66.9412	26.1649	40.7429	up	Similar to Usp5: Ubiquitin carboxyl-terminal hydrolase 5 (Mus musculus OX%3D10090)
ANN01133	2.11594	7.75351e-19	3556.11	3279.69	3786.72	18449.4	11954.6	15640.1	up	Similar to Heat shock 70 kDa protein cognate 4 (Manduca sexta OX%3D7130)		ANN01090	1.47501	7.64801e-26	8260.64	8504.19	8349.05	24165	21588	24060.3	up	Similar to rpl27: 60S ribosomal protein L27 (Danio rerio OX%3D7955)
ANN01140	2.16819	6.69506e-18	231.543	217.341	211.488	1210.47	849.815	912.285	up	Similar to cpped1: Serine/threonine-protein phosphatase CPPED1 (Xenopus tropicalis OX%3D8364)		ANN01095	1.6251	2.51275e-07	82.6958	62.1948	59.9074	248.639	168.395	217.567	up	Similar to Sf3b4: Splicing factor 3B subunit 4 (Rattus norvegicus OX%3D10116)
ANN01159	5.92505	7.69737e-33	4.82381	2.06011	12.3497	311.168	330.89	418.873	up	Protein of unknown function		ANN01097	1.24393	1.42779e-08	188.859	168.815	166.572	451.853	393.815	397.651	up	Similar to SFMBT2: Scm-like with four MBT domains protein 2 (Homo sapiens OX%3D9606)
ANN01160	7.21594	1.07899e-18	0	2.06011	3.08742	273.651	186.707	220.374	up	Protein of unknown function		ANN01119	1.71592	4.12792e-07	54.758	45.6942	35.0678	155.399	155.648	136.896	up	Similar to Aggf1: Angiogenic factor with G patch and FHA domains 1 (Mus musculus OX%3D10090)
ANN01161	8.23733	1.07957e-18	0.964762	2.06011	0	230.617	349.494	435.077	up	Protein of unknown function		ANN01120	1.96055	3.99948e-41	19160.8	16929.7	17070.7	64568.7	73341.5	69003.1	up	Similar to Heat shock 70 kDa protein cognate 4 (Manduca sexta OX%3D7130)
ANN01165	5.76889	5.6757e-28	4.82381	2.06011	9.26226	226.204	258.466	332.182	up	Protein of unknown function		ANN01121	1.61724	2.64344e-11	3153.62	2970.12	2450.36	10292.2	5777.07	10239.5	up	Similar to Heat shock 70 kDa protein cognate 4 (Manduca sexta OX%3D7130)
ANN01185	3.42732	0.00879509	0	0	6.17484	29.7927	17.2754	9.72239	up	Similar to ifi30: Gamma-interferon-inducible lysosomal thiol reductase (Danio rerio OX%3D7955)		ANN01129	2.9387	0.0454664	3.35253	1.26928	0	4.78151	12.0761	20.3715	up	Similar to tbc1d31: TBC1 domain family member 31 (Xenopus tropicalis OX%3D8364)
ANN01187	2.65423	0.0139574	1.92952	3.09016	3.08742	28.6893	9.30212	12.9632	up	Similar to ifi30: Gamma-interferon-inducible lysosomal thiol reductase (Danio rerio OX%3D7955)		ANN01133	1.77834	1.29821e-24	4012.98	3854.81	3191.17	11054.1	12864.4	14023.7	up	Similar to Heat shock 70 kDa protein cognate 4 (Manduca sexta OX%3D7130)
ANN01190	1.19932	0.00281121	53.0619	58.713	52.4861	141.239	152.156	84.2608	up	Similar to Vps16: Vacuolar protein sorting-associated protein 16 homolog (Mus musculus OX%3D10090)		ANN01140	2.10602	6.52935e-24	241.382	203.085	232.324	1098.15	809.77	1007.17	up	Similar to cpped1: Serine/threonine-protein phosphatase CPPED1 (Xenopus tropicalis OX%3D8364)
ANN01191	2.12999	0.0355318	3.85905	0	21.6119	49.6545	28.5708	27.5468	up	Similar to PCMT1: Protein-L-isoaspartate(D-aspartate) O-methyltransferase (Gallus gallus OX%3D9031)		ANN01159	6.41105	8.20353e-35	6.70507	5.07713	1.46116	313.986	430.714	432.69	up	Protein of unknown function
ANN01192	1.63414	0.000694174	91.6524	22.6612	52.4861	179.86	188.7	150.697	up	Protein of unknown function		ANN01160	7.32082	3.48391e-20	2.23502	0	2.92231	231.903	293.852	285.201	up	Protein of unknown function
ANN01195	2.83273	0.00320462	3.85905	6.18032	0	15.4481	39.2018	21.0652	up	Similar to PCMT1: Protein-L-isoaspartate(D-aspartate) O-methyltransferase (Gallus gallus OX%3D9031)		ANN01161	7.44439	5.93471e-30	0	5.07713	2.92231	367.379	478.348	484.841	up	Protein of unknown function
ANN01196	1.34577	1.19942e-06	106.124	98.8851	111.147	287.996	260.459	254.403	up	Similar to VPS16: Vacuolar protein sorting-associated protein 16 homolog (Homo sapiens OX%3D9606)		ANN01165	6.45672	7.1899e-38	8.94009	0	5.84463	502.059	379.055	448.172	up	Protein of unknown function
ANN01198	4.30714	3.04247e-06	0.964762	3.09016	1.54371	49.6545	32.5574	29.9774	up	Similar to IFI30: Gamma-interferon-inducible lysosomal thiol reductase (Bos taurus OX%3D9913)		ANN01185	5.10092	0.000233713	0	0	2.92231	11.9538	31.532	46.447	up	Similar to ifi30: Gamma-interferon-inducible lysosomal thiol reductase (Danio rerio OX%3D7955)
ANN01201	1.09955	4.76634e-05	232.508	319.317	301.023	519.717	690.35	614.131	up	Similar to tps1: Alpha%2Calpha-trehalose-phosphate synthase [UDP-forming] (Schizosaccharomyces pombe (strain 972 / ATCC 24843) OX%3D284812)		ANN01187	2.32836	0.0159122	10.0576	0	10.2281	16.7353	28.8485	56.2253	up	Similar to ifi30: Gamma-interferon-inducible lysosomal thiol reductase (Danio rerio OX%3D7955)
ANN01207	1.6032	3.50976e-05	71.3924	79.3141	160.546	375.167	240.526	321.649	up	Protein of unknown function		ANN01188	1.91682	0.000294109	27.9378	40.617	40.9124	49.4089	171.078	191.492	up	Similar to rp2: Protein XRP2 (Danio rerio OX%3D7955)
ANN01208	1.04758	0.0284287	98.4057	122.576	230.013	452.407	164.78	311.927	up	Protein of unknown function		ANN01191	3.60152	4.10048e-06	0	5.07713	8.76694	38.2521	62.3932	59.4847	up	Similar to PCMT1: Protein-L-isoaspartate(D-aspartate) O-methyltransferase (Gallus gallus OX%3D9031)
ANN01209	2.06643	5.94732e-05	135.067	155.538	472.375	1325.22	468.428	1391.11	up	Protein of unknown function		ANN01192	1.91467	3.8469e-05	22.3502	27.9242	73.0579	161.774	174.433	123.044	up	Protein of unknown function
ANN01211	1.98697	6.31661e-06	17.3657	30.9016	32.4179	132.412	88.3701	96.4137	up	Protein of unknown function		ANN01195	5.63247	0.000245072	1.11751	0	0	26.2983	14.0888	27.7052	up	Similar to PCMT1: Protein-L-isoaspartate(D-aspartate) O-methyltransferase (Gallus gallus OX%3D9031)
ANN01212	1.50514	0.00118803	230.578	208.071	378.209	1279.98	332.219	704.063	up	Protein of unknown function		ANN01196	2.41217	3.22581e-07	20.1152	41.8863	26.3008	242.263	95.9379	131.192	up	Similar to VPS16: Vacuolar protein sorting-associated protein 16 homolog (Homo sapiens OX%3D9606)
ANN01213	1.28607	0.00294523	422.566	291.505	708.563	1537.08	596	1331.97	up	Protein of unknown function		ANN01198	2.84417	0.00036021	24.5852	2.53856	17.5339	19.923	173.762	127.933	up	Similar to IFI30: Gamma-interferon-inducible lysosomal thiol reductase (Bos taurus OX%3D9913)
ANN01214	1.1888	0.00588306	1346.81	1376.15	2594.98	4884.9	1870.39	5363.52	up	Protein of unknown function		ANN01201	1.38523	3.27551e-09	215.68	347.783	290.77	672.599	801.048	754.559	up	Similar to tps1: Alpha%2Calpha-trehalose-phosphate synthase [UDP-forming] (Schizosaccharomyces pombe (strain 972 / ATCC 24843) OX%3D284812)
ANN01228	1.59338	4.97536e-06	64.639	79.3141	104.972	185.377	307.634	251.162	up	Similar to FASN: Fatty acid synthase (Gallus gallus OX%3D9031)		ANN01207	2.44361	0.0060669	112.869	244.971	423.736	439.899	2226.03	1583.27	up	Protein of unknown function
ANN01232	1.15894	0.00117495	127.349	162.748	128.128	442.477	269.097	225.235	up	Similar to Ino80e: INO80 complex subunit E (Rattus norvegicus OX%3D10116)		ANN01208	2.2761	5.04306e-09	86.0483	213.239	328.76	706.07	1158.63	1167.69	up	Protein of unknown function
ANN01237	2.18873	6.23772e-15	3844.58	5761.09	5898.52	29842.3	18022.9	22813.6	up	Similar to RpL40: Ubiquitin-60S ribosomal protein L40 (Drosophila melanogaster OX%3D7227)		ANN01209	2.41837	3.0821e-14	186.624	285.589	482.182	1328.46	2153.57	1606.9	up	Protein of unknown function
ANN01240	5.34582	0.00982321	5.78857	0	114.235	1798.6	1437.18	1628.5	up	Protein of unknown function		ANN01210	2.2275	0.0199596	24.5852	58.387	128.582	114.756	489.753	383.798	up	Protein of unknown function
ANN01241	5.0085	2.60639e-06	6.75333	2.06011	35.5053	548.406	387.367	458.573	up	Protein of unknown function		ANN01211	3.94174	0.00886932	10.0576	26.6549	65.7521	21.5168	958.037	591.587	up	Protein of unknown function
ANN01242	7.56861	1.05202e-29	1.92952	0	6.17484	497.648	389.36	422.924	up	Protein of unknown function		ANN01212	2.5137	0.000109027	143.041	239.894	527.478	1183.42	1814.1	2196.86	up	Protein of unknown function
ANN01253	1.04105	0.00223713	141.82	165.839	165.177	451.304	249.164	273.847	up	Similar to MED22: Mediator of RNA polymerase II transcription subunit 22 (Aedes aegypti OX%3D7159)		ANN01213	2.41592	0.0383064	466.002	910.075	1857.13	807.278	9357.64	7087.64	up	Protein of unknown function
ANN01254	1.72304	7.50764e-09	153.397	138.027	143.565	628.957	374.743	435.077	up	Similar to Orc2: Origin recognition complex subunit 2 (Drosophila melanogaster OX%3D7227)		ANN01214	2.03151	0.0428113	2956.93	5205.33	7346.7	4044.36	36292.7	23067	up	Protein of unknown function
ANN01278	1.49762	0.00149782	20.26	24.7213	32.4179	89.3781	58.4705	68.867	up	Protein of unknown function		ANN01232	1.04938	0.000178361	127.396	153.583	127.121	349.05	236.155	259.94	up	Similar to Ino80e: INO80 complex subunit E (Rattus norvegicus OX%3D10116)
ANN01279	1.54082	1.44521e-06	75.2514	129.787	94.1663	254.893	304.312	311.117	up	Similar to 6-phosphofructo-2-kinase/fructose-2%2C6-bisphosphatase (Lithobates catesbeianus OX%3D8400)		ANN01237	1.44011	8.14381e-24	7002.32	6300.72	7086.61	19002.5	17647.9	18674.9	up	Similar to RpL40: Ubiquitin-60S ribosomal protein L40 (Drosophila melanogaster OX%3D7227)
ANN01285	1.43195	3.24691e-05	65.6038	54.5928	58.661	195.308	153.485	135.303	up	Similar to 6-phosphofructo-2-kinase/fructose-2%2C6-bisphosphatase (Lithobates catesbeianus OX%3D8400)		ANN01240	9.65528	1.98749e-53	4.47004	2.53856	0	1853.63	2107.95	2148.78	up	Protein of unknown function
ANN01290	2.15846	9.03961e-25	656.038	599.491	702.388	2681.34	3151.43	2901.32	up	Similar to EF2: Elongation factor 2 (Drosophila melanogaster OX%3D7227)		ANN01241	8.12016	4.42556e-36	4.47004	0	2.92231	615.221	654.122	841.749	up	Protein of unknown function
ANN01294	2.10155	3.99412e-11	57.8857	89.6146	61.7484	327.72	250.493	323.27	up	Similar to PRMT6.1: Probable protein arginine N-methyltransferase 6.1 (Oryza sativa subsp. indica OX%3D39946)		ANN01242	9.3227	5.65158e-18	0	2.53856	0	467.791	572.273	583.439	up	Protein of unknown function
ANN01303	2.63437	8.75178e-26	170.763	188.5	159.002	1261.22	890.346	1073.51	up	Similar to PRMT6.1: Probable protein arginine N-methyltransferase 6.1 (Oryza sativa subsp. indica OX%3D39946)		ANN01254	1.60825	3.17091e-11	108.399	149.775	149.038	443.884	376.372	418.023	up	Similar to Orc2: Origin recognition complex subunit 2 (Drosophila melanogaster OX%3D7227)
ANN01314	3.93343	1.54924e-18	8.68286	8.24043	15.4371	151.17	141.525	183.915	up	Similar to pcmt: Protein-L-isoaspartate(D-aspartate) O-methyltransferase (Danio rerio OX%3D7955)		ANN01278	1.13251	0.0144013	25.7028	29.1935	33.6066	63.7535	73.1275	56.2253	up	Protein of unknown function
ANN01317	1.85789	1.2385e-06	27.9781	28.8415	30.8742	107.033	102.988	106.946	up	Similar to PIMT1: Protein-L-isoaspartate O-methyltransferase 1 (Arabidopsis thaliana OX%3D3702)		ANN01279	2.6153	2.61364e-09	50.288	25.3856	30.6843	345.066	146.255	164.601	up	Similar to 6-phosphofructo-2-kinase/fructose-2%2C6-bisphosphatase (Lithobates catesbeianus OX%3D8400)
ANN01318	2.28911	0.0317001	3.85905	8.24043	0	33.103	9.30212	20.255	up	Similar to EIF3K: Eukaryotic translation initiation factor 3 subunit K (Homo sapiens OX%3D9606)		ANN01282	1.61087	7.54436e-10	86.0483	87.5805	83.286	255.811	292.51	236.309	up	Similar to Ece1: Endothelin-converting enzyme 1 (Mus musculus OX%3D10090)
ANN01321	1.18514	0.0285064	33.7667	37.0819	18.5245	40.827	87.7057	76.1588	up	Similar to Casein kinase II subunit alpha (Spodoptera frugiperda OX%3D7108)		ANN01283	2.17427	1.98893e-05	13.4101	24.1164	24.8397	131.492	57.6969	90.4493	up	Similar to Tret1: Facilitated trehalose transporter Tret1 (Bombyx mori OX%3D7091)
ANN01349	1.0812	0.0157705	52.0971	39.142	66.3795	72.8266	143.518	113.428	up	Similar to HM13: Minor histocompatibility antigen H13 (Homo sapiens OX%3D9606)		ANN01290	1.82109	4.82063e-35	812.43	798.379	784.641	2766.9	2823.12	2875.64	up	Similar to EF2: Elongation factor 2 (Drosophila melanogaster OX%3D7227)
ANN01350	1.08456	5.56086e-05	508.43	337.858	486.269	1048.26	844.5	932.54	up	Similar to HM13: Minor histocompatibility antigen H13 (Homo sapiens OX%3D9606)		ANN01294	2.59977	2.39746e-07	29.0553	21.5778	46.757	303.626	81.8491	202.085	up	Similar to PRMT6.1: Probable protein arginine N-methyltransferase 6.1 (Oryza sativa subsp. indica OX%3D39946)
ANN01359	1.9189	1.90327e-15	271.098	352.278	248.537	1122.19	1061.77	1119.7	up	Similar to GluProRS: Bifunctional glutamate/proline--tRNA ligase (Drosophila melanogaster OX%3D7227)		ANN01303	2.06246	1.84308e-26	191.094	181.507	170.955	709.257	801.719	761.893	up	Similar to PRMT6.1: Probable protein arginine N-methyltransferase 6.1 (Oryza sativa subsp. indica OX%3D39946)
ANN01369	1.68953	3.05888e-06	51.1324	43.2622	44.7676	187.584	124.914	138.544	up	Similar to GluProRS: Bifunctional glutamate/proline--tRNA ligase (Drosophila melanogaster OX%3D7227)		ANN01310	4.25299	1.31157e-11	6.70507	5.07713	2.92231	137.07	76.482	73.3373	up	Similar to K12H4.7: Putative serine protease K12H4.7 (Caenorhabditis elegans OX%3D6239)
ANN01370	1.24605	0.00147647	141.82	140.087	97.2537	168.825	387.367	344.335	up	Similar to GluProRS: Bifunctional glutamate/proline--tRNA ligase (Drosophila melanogaster OX%3D7227)		ANN01312	1.03528	0.00568392	72.6382	91.3883	43.8347	159.384	130.824	137.711	up	Similar to VPS33B: Vacuolar protein sorting-associated protein 33B (Bos taurus OX%3D9913)
ANN01371	1.75385	2.19276e-11	128.313	133.907	104.972	402.753	396.669	443.989	up	Similar to trmt10a: tRNA methyltransferase 10 homolog A (Xenopus tropicalis OX%3D8364)		ANN01314	10.1597	7.52845e-16	0	0	0	222.34	234.813	347.945	up	Similar to pcmt: Protein-L-isoaspartate(D-aspartate) O-methyltransferase (Danio rerio OX%3D7955)
ANN01380	1.23902	3.82129e-05	116.736	125.667	152.827	366.34	251.822	312.737	up	Similar to PPIH: Peptidyl-prolyl cis-trans isomerase H (Homo sapiens OX%3D9606)		ANN01317	1.51346	0.00177844	27.9378	29.1935	20.4562	84.4734	50.3171	88.0048	up	Similar to PIMT1: Protein-L-isoaspartate O-methyltransferase 1 (Arabidopsis thaliana OX%3D3702)
ANN01389	4.77639	2.91226e-05	1.92952	1.03005	0	40.827	29.8997	20.255	up	Protein of unknown function		ANN01349	1.39245	0.020786	10.0576	39.3478	35.0678	102.802	53.0007	64.3738	up	Similar to HM13: Minor histocompatibility antigen H13 (Homo sapiens OX%3D9606)
ANN01390	3.40739	4.43115e-12	12.5419	16.4809	3.08742	119.171	129.565	108.567	up	Similar to Ccne1: G1/S-specific cyclin-E1 (Rattus norvegicus OX%3D10116)		ANN01350	1.01944	5.82771e-08	443.652	417.594	425.197	775.402	958.037	874.344	up	Similar to HM13: Minor histocompatibility antigen H13 (Homo sapiens OX%3D9606)
ANN01393	5.25946	0.00677173	0	0	0	4.41373	5.3155	14.5836	up	Protein of unknown function		ANN01359	1.61759	6.52474e-19	438.064	376.977	420.813	1133.22	1380.03	1279.33	up	Similar to GluProRS: Bifunctional glutamate/proline--tRNA ligase (Drosophila melanogaster OX%3D7227)
ANN01394	1.10416	0.00047919	163.045	214.251	134.303	357.512	302.983	443.179	up	Similar to W: Protein white (Ceratitis capitata OX%3D7213)		ANN01369	1.22035	0.00763593	43.5829	27.9242	26.3008	74.9103	89.8999	64.3738	up	Similar to GluProRS: Bifunctional glutamate/proline--tRNA ligase (Drosophila melanogaster OX%3D7227)
ANN01395	5.48652	4.26056e-24	1.92952	4.12021	9.26226	230.617	186.707	207.411	up	Protein of unknown function		ANN01370	1.3168	0.000236209	122.926	52.0406	77.4413	219.949	217.37	193.936	up	Similar to GluProRS: Bifunctional glutamate/proline--tRNA ligase (Drosophila melanogaster OX%3D7227)
ANN01398	3.08097	5.88941e-12	13.5067	18.541	15.4371	179.86	124.25	98.8443	up	Similar to TTPAL: Alpha-tocopherol transfer protein-like (Homo sapiens OX%3D9606)		ANN01371	1.37018	3.03585e-06	94.9884	77.4262	64.2909	219.949	191.205	203.715	up	Similar to trmt10a: tRNA methyltransferase 10 homolog A (Xenopus tropicalis OX%3D8364)
ANN01409	1.61222	8.223e-07	132.172	147.298	129.672	561.647	285.708	406.72	up	Similar to nr2c2ap: Nuclear receptor 2C2-associated protein (Danio rerio OX%3D7955)		ANN01380	1.28266	0.0342436	82.6958	38.0785	58.4463	268.562	49.6462	118.969	up	Similar to PPIH: Peptidyl-prolyl cis-trans isomerase H (Homo sapiens OX%3D9606)
ANN01414	2.39629	7.15239e-11	27.9781	59.7431	43.2239	204.135	217.271	266.556	up	Similar to HBP1: HMG box-containing protein 1 (Pongo abelii OX%3D9601)		ANN01389	6.58539	1.6398e-05	0	0	0	20.7199	16.7724	30.1498	up	Protein of unknown function
ANN01426	4.7896	5.5393e-30	9.64762	10.3005	9.26226	217.376	304.977	287.621	up	Protein of unknown function		ANN01390	4.19698	7.71699e-15	6.70507	5.07713	5.84463	107.584	103.989	113.265	up	Similar to Ccne1: G1/S-specific cyclin-E1 (Rattus norvegicus OX%3D10116)
ANN01445	1.70156	1.2568e-06	56.921	46.3524	74.0981	184.273	229.231	157.989	up	Similar to wrn: Werner syndrome ATP-dependent helicase homolog (Xenopus laevis OX%3D8355)		ANN01393	5.01661	0.000743581	2.23502	0	0	6.37535	35.5574	37.4835	up	Protein of unknown function
ANN01448	1.80801	1.14877e-07	62.7095	62.8333	81.8166	315.582	193.351	214.703	up	Similar to Trip13: Pachytene checkpoint protein 2 homolog (Rattus norvegicus OX%3D10116)		ANN01395	4.50154	1.09426e-20	10.0576	7.61569	8.76694	286.094	159.002	156.453	up	Protein of unknown function
ANN01449	3.66854	2.44253e-79	986.951	1110.4	1029.65	12665.2	13056.2	14041.6	up	Similar to exu: Maternal protein exuperantia (Drosophila virilis OX%3D7244)		ANN01398	2.59619	7.80374e-09	17.8802	40.617	14.6116	154.602	111.368	177.639	up	Similar to TTPAL: Alpha-tocopherol transfer protein-like (Homo sapiens OX%3D9606)
ANN01450	1.29714	2.7315e-05	137.961	86.5245	123.497	305.651	254.479	294.913	up	Similar to Nthl1: Endonuclease III-like protein 1 (Mus musculus OX%3D10090)		ANN01409	1.23471	5.23253e-05	88.2834	111.697	173.878	290.078	299.89	285.201	up	Similar to nr2c2ap: Nuclear receptor 2C2-associated protein (Danio rerio OX%3D7955)
ANN01457	3.18355	1.08642e-21	78.1457	77.254	35.5053	668.68	485.039	606.839	up	Protein of unknown function		ANN01414	2.60801	4.79145e-08	10.0576	35.5399	58.4463	239.076	212.674	173.565	up	Similar to HBP1: HMG box-containing protein 1 (Pongo abelii OX%3D9601)
ANN01458	3.67037	2.01745e-09	9.64762	8.24043	1.54371	51.8613	99.0011	110.187	up	Protein of unknown function		ANN01421	4.43903	7.20033e-08	2.23502	5.07713	0	49.4089	53.0007	61.1144	up	Similar to X-element\ORF2: Probable RNA-directed DNA polymerase from transposon X-element (Drosophila melanogaster OX%3D7227)
ANN01459	7.49979	7.2659e-08	0	0	0	45.2407	30.5641	39.6998	up	Protein of unknown function		ANN01422	5.31902	0.00134673	1.11751	0	0	8.7661	33.5447	12.2229	up	Similar to K12H4.7: Putative serine protease K12H4.7 (Caenorhabditis elegans OX%3D6239)
ANN01460	3.65611	7.25332e-23	31.8371	15.4508	27.7868	380.684	253.151	310.306	up	Protein of unknown function		ANN01426	5.05586	6.73657e-32	4.47004	17.77	5.84463	286.891	307.941	335.722	up	Protein of unknown function
ANN01461	2.29103	7.21815e-17	133.137	132.877	186.789	862.885	621.249	721.888	up	Similar to Ggh: Gamma-glutamyl hydrolase (Mus musculus OX%3D10090)		ANN01445	1.56686	0.000536996	33.5253	36.8092	18.995	101.209	67.7603	97.7831	up	Similar to wrn: Werner syndrome ATP-dependent helicase homolog (Xenopus laevis OX%3D8355)
ANN01482	2.52874	1.63348e-27	604.906	475.885	517.143	3618.16	2824.52	2783.85	up	Similar to nop2: 25S rRNA (cytosine-C(5))-methyltransferase nop2 (Schizosaccharomyces pombe (strain 972 / ATCC 24843) OX%3D284812)		ANN01448	1.47887	4.94722e-06	73.7557	54.5791	108.126	228.716	226.762	200.455	up	Similar to Trip13: Pachytene checkpoint protein 2 homolog (Rattus norvegicus OX%3D10116)
ANN01486	4.00452	2.52502e-31	19.2952	20.6011	35.5053	421.511	336.205	419.683	up	Protein of unknown function		ANN01449	3.53682	1.87003e-115	1322.02	1235.01	1241.98	16477.9	14175.3	13446	up	Similar to exu: Maternal protein exuperantia (Drosophila virilis OX%3D7244)
ANN01488	1.39949	0.000914762	75.2514	55.6229	35.5053	109.24	191.358	141.785	up	Similar to cmtr1: Cap-specific mRNA (nucleoside-2'-O-)-methyltransferase 1 (Danio rerio OX%3D7955)		ANN01450	1.09457	0.000284633	103.929	129.467	99.3587	266.968	264.332	179.269	up	Similar to Nthl1: Endonuclease III-like protein 1 (Mus musculus OX%3D10090)
ANN01489	1.75516	0.000547014	49.2029	21.6311	26.2431	61.7922	136.874	130.442	up	Similar to R1A1-element\ORF2: Putative 115 kDa protein in type-1 retrotransposable element R1DM (Drosophila melanogaster OX%3D7227)		ANN01457	3.05798	3.46983e-23	52.523	66.0027	36.5289	550.671	349.536	397.651	up	Protein of unknown function
ANN01509	2.07348	1.80689e-07	49.2029	54.5928	29.3305	239.445	130.23	198.499	up	Similar to pold2: DNA polymerase delta subunit 2 (Xenopus laevis OX%3D8355)		ANN01458	8.90504	6.43323e-12	0	0	0	113.162	85.8745	138.526	up	Protein of unknown function
ANN01510	1.70505	2.27427e-09	179.446	324.467	285.586	869.505	878.386	822.353	up	Similar to Nnp-1: Ribosomal RNA processing protein 1 homolog (Drosophila melanogaster OX%3D7227)		ANN01459	5.34729	3.29343e-05	0	0	2.92231	27.8921	32.2029	45.6321	up	Protein of unknown function
ANN01515	1.15229	0.0113607	26.0486	27.8114	40.1365	70.6197	63.786	72.1078	up	Similar to hmces: Abasic site processing protein HMCES (Xenopus tropicalis OX%3D8364)		ANN01460	5.44133	5.73108e-39	4.47004	12.6928	8.76694	391.287	328.067	388.688	up	Protein of unknown function
ANN01521	2.53286	2.15802e-18	264.345	335.797	432.239	2502.59	1522.23	1937.19	up	Similar to Eukaryotic translation initiation factor 3 subunit K (Bombyx mori OX%3D7091)		ANN01461	2.30848	1.85248e-31	154.217	170.084	175.339	758.666	815.808	897.16	up	Similar to Ggh: Gamma-glutamyl hydrolase (Mus musculus OX%3D10090)
ANN01533	2.10071	0.00029901	10.6124	10.3005	26.2431	92.6884	50.4972	53.4732	up	Similar to Gins3: DNA replication complex GINS protein PSF3 (Mus musculus OX%3D10090)		ANN01482	2.17936	9.2523e-43	562.108	615.602	599.074	2853.76	2487.01	2705.33	up	Similar to nop2: 25S rRNA (cytosine-C(5))-methyltransferase nop2 (Schizosaccharomyces pombe (strain 972 / ATCC 24843) OX%3D284812)
ANN01574	8.11523	9.3504e-19	1.92952	1.03005	0	269.238	357.467	306.255	up	Protein of unknown function		ANN01486	3.62845	8.08953e-34	29.0553	40.617	26.3008	455.837	346.182	387.873	up	Protein of unknown function
ANN01575	2.38019	2.13506e-16	91.6524	109.186	67.9233	460.132	532.214	416.443	up	Similar to DDX43: Probable ATP-dependent RNA helicase DDX43 (Homo sapiens OX%3D9606)		ANN01488	1.68623	4.35438e-05	58.1106	27.9242	55.524	176.119	175.774	103.487	up	Similar to cmtr1: Cap-specific mRNA (nucleoside-2'-O-)-methyltransferase 1 (Danio rerio OX%3D7955)
ANN01577	3.86456	6.33154e-23	37.6257	22.6612	10.806	293.513	378.729	396.188	up	Similar to G2/mitotic-specific cyclin-B (Marthasterias glacialis OX%3D7609)		ANN01489	2.24168	3.28462e-08	21.2327	25.3856	20.4562	110.772	91.2416	115.71	up	Similar to R1A1-element\ORF2: Putative 115 kDa protein in type-1 retrotransposable element R1DM (Drosophila melanogaster OX%3D7227)
ANN01593	1.4188	0.00372242	25.0838	57.683	83.3604	185.377	103.652	150.697	up	Similar to DDX43: Probable ATP-dependent RNA helicase DDX43 (Homo sapiens OX%3D9606)		ANN01502	1.24773	0.00208185	63.6981	49.502	46.757	150.618	81.8491	149.119	up	Similar to prmt9: Protein arginine N-methyltransferase 9 (Xenopus laevis OX%3D8355)
ANN01594	7.14899	5.95288e-10	0	2.06011	0	101.516	84.3835	133.683	up	Similar to TY3B-I: Transposon Ty3-I Gag-Pol polyprotein (Saccharomyces cerevisiae (strain ATCC 204508 / S288c) OX%3D559292)		ANN01509	2.06943	0.00331053	43.5829	5.07713	16.0727	130.695	42.9372	101.042	up	Similar to pold2: DNA polymerase delta subunit 2 (Xenopus laevis OX%3D8355)
ANN01620	2.25439	4.02102e-13	73.3219	105.065	132.759	513.096	401.985	559.038	up	Similar to Imp4: U3 small nucleolar ribonucleoprotein protein IMP4 (Rattus norvegicus OX%3D10116)		ANN01510	1.29574	9.39921e-08	293.905	217.047	325.838	789.746	566.235	697.519	up	Similar to Nnp-1: Ribosomal RNA processing protein 1 homolog (Drosophila melanogaster OX%3D7227)
ANN01621	2.24311	2.07666e-08	41.4848	66.9535	112.691	447.994	262.453	324.89	up	Protein of unknown function		ANN01520	3.77723	0.0318872	2.23502	0	0	7.17227	19.4559	6.51887	up	Similar to pold2: DNA polymerase delta subunit 2 (Xenopus laevis OX%3D8355)
ANN01622	2.39898	2.392e-15	114.807	86.5245	138.934	752.541	500.986	533.921	up	Protein of unknown function		ANN01521	2.87314	0.000289412	177.684	96.4655	168.033	2067.21	340.814	831.971	up	Similar to Eukaryotic translation initiation factor 3 subunit K (Bombyx mori OX%3D7091)
ANN01631	2.4075	1.45676e-11	54.9914	37.0819	58.661	315.582	188.7	292.482	up	Protein of unknown function		ANN01533	3.50556	1.78365e-06	3.35253	5.07713	4.38347	47.0182	34.2156	63.559	up	Similar to Gins3: DNA replication complex GINS protein PSF3 (Mus musculus OX%3D10090)
ANN01663	1.00291	0.00162639	105.159	161.718	117.322	242.755	237.204	290.862	up	Similar to uri: Unconventional prefoldin RPB5 interactor-like protein (Drosophila melanogaster OX%3D7227)		ANN01546	2.31718	0.00384064	13.4101	7.61569	13.1504	94.0364	11.4052	65.1887	up	Similar to SIDT1: SID1 transmembrane family member 1 (Homo sapiens OX%3D9606)
ANN01665	1.00142	0.00140534	95.5114	122.576	148.196	222.893	241.855	264.125	up	Similar to mepce: 7SK snRNA methylphosphate capping enzyme (Danio rerio OX%3D7955)		ANN01547	2.60508	0.0160195	86.0483	60.9256	62.8298	849.515	57.6969	369.946	up	Similar to PPIB: Peptidyl-prolyl cis-trans isomerase B (Homo sapiens OX%3D9606)
ANN01668	1.36938	8.35883e-06	320.301	269.874	279.412	1033.92	560.121	656.262	up	Similar to Pgp: Glycerol-3-phosphate phosphatase (Rattus norvegicus OX%3D10116)		ANN01560	1.00823	0.00150769	88.2834	90.119	115.431	152.211	202.61	234.679	up	Similar to akr1a1a: Aldo-keto reductase family 1 member A1-A (Danio rerio OX%3D7955)
ANN01671	1.87872	9.27838e-09	47.2733	42.2322	58.661	185.377	171.425	183.915	up	Similar to Trip13: Pachytene checkpoint protein 2 homolog (Rattus norvegicus OX%3D10116)		ANN01574	7.92551	7.96287e-13	0	2.53856	0	204.808	179.8	232.235	up	Protein of unknown function
ANN01672	1.79026	1.42386e-08	65.6038	67.9835	60.2047	201.928	199.996	269.796	up	Protein of unknown function		ANN01575	2.15846	2.02733e-14	91.6359	96.4655	157.805	414.398	586.362	535.362	up	Similar to DDX43: Probable ATP-dependent RNA helicase DDX43 (Homo sapiens OX%3D9606)
ANN01673	1.4167	9.0819e-07	84.899	83.4343	98.7975	237.238	223.915	249.541	up	Protein of unknown function		ANN01577	4.64061	9.40963e-23	14.5276	7.61569	10.2281	153.008	375.701	286.015	up	Similar to G2/mitotic-specific cyclin-B (Marthasterias glacialis OX%3D7609)
ANN01679	1.17361	6.14259e-05	202.6	169.959	131.215	371.857	339.527	430.216	up	Protein of unknown function		ANN01579	1.39624	9.96027e-09	233.56	184.046	168.033	427.148	532.019	585.883	up	Similar to Pgant9: Putative polypeptide N-acetylgalactosaminyltransferase 9 (Drosophila melanogaster OX%3D7227)
ANN01703	2.78357	1.71003e-15	38.5905	60.7731	77.1855	516.407	366.105	320.839	up	Similar to ELOVL7: Elongation of very long chain fatty acids protein 7 (Homo sapiens OX%3D9606)		ANN01590	1.36386	0.00294808	60.3456	49.502	64.2909	72.5196	220.053	154.823	up	Similar to gly-5: Polypeptide N-acetylgalactosaminyltransferase 5 (Caenorhabditis elegans OX%3D6239)
ANN01704	1.70155	0.00157947	13.5067	19.571	33.9616	98.2055	55.1483	60.765	up	Protein of unknown function		ANN01593	2.62966	1.90312e-07	14.5276	38.0785	17.5339	224.731	99.9633	109.191	up	Similar to DDX43: Probable ATP-dependent RNA helicase DDX43 (Homo sapiens OX%3D9606)
ANN01714	1.33897	3.07835e-07	230.578	177.169	172.896	459.028	524.241	488.55	up	Protein of unknown function		ANN01594	6.01161	1.15815e-15	4.47004	2.53856	0	236.685	98.6215	148.304	up	Similar to TY3B-I: Transposon Ty3-I Gag-Pol polyprotein (Saccharomyces cerevisiae (strain ATCC 204508 / S288c) OX%3D559292)
ANN01724	2.16101	1.18243e-07	53.0619	48.4125	18.5245	182.066	162.787	202.55	up	Similar to PNLIPRP1: Inactive pancreatic lipase-related protein 1 (Homo sapiens OX%3D9606)		ANN01620	2.1365	5.2701e-20	120.691	96.4655	141.732	564.218	493.107	517.435	up	Similar to Imp4: U3 small nucleolar ribonucleoprotein protein IMP4 (Rattus norvegicus OX%3D10116)
ANN01734	2.17668	0.000836857	27.0133	10.3005	38.5928	212.963	47.175	80.2098	up	Similar to Pnliprp1: Inactive pancreatic lipase-related protein 1 (Mus musculus OX%3D10090)		ANN01621	1.70253	6.38295e-12	103.929	93.9269	94.9752	311.595	288.485	354.464	up	Protein of unknown function
ANN01736	4.03711	5.55815e-22	18.3305	40.1721	16.9808	601.371	318.265	337.043	up	Similar to CYP4C1: Cytochrome P450 4C1 (Blaberus discoidalis OX%3D6981)		ANN01622	1.79402	6.94971e-19	168.744	158.66	150.499	545.889	548.121	565.512	up	Protein of unknown function
ANN01737	3.10241	0.0028812	1.92952	3.09016	1.54371	28.6893	13.9532	15.3938	up	Protein of unknown function		ANN01631	1.5945	6.0387e-08	78.2258	64.7334	73.0579	251.826	220.053	180.899	up	Protein of unknown function
ANN01738	4.40417	5.56758e-10	3.85905	0	7.71855	91.5849	71.0948	61.5752	up	Similar to CYP4C1: Cytochrome P450 4C1 (Blaberus discoidalis OX%3D6981)		ANN01663	1.052	0.00504462	84.9308	59.6563	112.509	207.996	126.128	198.011	up	Similar to uri: Unconventional prefoldin RPB5 interactor-like protein (Drosophila melanogaster OX%3D7227)
ANN01746	1.89152	3.19862e-12	148.573	149.358	202.226	569.371	552.812	725.129	up	Protein of unknown function		ANN01665	1.03552	0.00271438	92.7534	154.852	99.3587	310.001	187.18	214.308	up	Similar to mepce: 7SK snRNA methylphosphate capping enzyme (Danio rerio OX%3D7955)
ANN01752	3.54795	1.26138e-21	26.0486	18.541	33.9616	255.996	390.025	256.833	up	Similar to Oca2: P protein (Mus musculus OX%3D10090)		ANN01668	1.48325	2.63843e-07	503.997	520.406	435.425	2020.19	957.366	1105.76	up	Similar to Pgp: Glycerol-3-phosphate phosphatase (Rattus norvegicus OX%3D10116)
ANN01769	1.81053	4.07387e-11	163.045	125.667	196.051	616.819	506.966	570.38	up	Similar to Mcm10: Protein MCM10 homolog (Drosophila melanogaster OX%3D7227)		ANN01671	1.59049	0.000207311	33.5253	43.1556	92.0529	207.199	160.344	136.081	up	Similar to Trip13: Pachytene checkpoint protein 2 homolog (Rattus norvegicus OX%3D10116)
ANN01770	1.55933	9.47044e-11	417.742	443.953	452.307	1561.36	1139.51	1172.36	up	Similar to U2af38: Splicing factor U2af 38 kDa subunit (Drosophila melanogaster OX%3D7227)		ANN01672	2.43933	2.78224e-06	26.8203	15.2314	23.3785	191.26	64.4059	100.228	up	Protein of unknown function
ANN01773	1.85069	8.21521e-09	126.384	112.276	89.5352	278.065	477.066	431.836	up	Similar to SMC2: Structural maintenance of chromosomes protein 2 (Homo sapiens OX%3D9606)		ANN01673	1.47841	0.000332714	29.0553	64.7334	51.1405	118.741	114.052	169.491	up	Protein of unknown function
ANN01774	1.22444	0.00155085	77.181	175.109	112.691	360.823	247.171	246.301	up	Similar to INTS14: Integrator complex subunit 14 (Gallus gallus OX%3D9031)		ANN01679	1.21701	6.30475e-06	136.336	211.97	239.63	465.4	405.22	492.175	up	Protein of unknown function
ANN01784	3.22301	1.44038e-13	62.7095	54.5928	16.9808	265.927	508.294	500.703	up	Similar to celf1: CUGBP Elav-like family member 1 (Xenopus tropicalis OX%3D8364)		ANN01703	3.20294	2.86864e-30	37.9954	33.0013	37.9901	358.613	324.713	320.24	up	Similar to ELOVL7: Elongation of very long chain fatty acids protein 7 (Homo sapiens OX%3D9606)
ANN01818	2.45097	0.00115716	10.6124	8.24043	3.08742	19.8618	37.2085	66.4364	up	Similar to Dys: Dystrophin%2C isoform D (Drosophila melanogaster OX%3D7227)		ANN01704	2.13808	0.000349859	25.7028	5.07713	16.0727	52.5966	73.7984	81.4859	up	Protein of unknown function
ANN01822	1.31595	0.0174518	23.1543	23.6912	15.4371	35.3099	67.1082	53.4732	up	Similar to vir: Protein virilizer (Drosophila pseudoobscura pseudoobscura OX%3D46245)		ANN01714	1.29362	6.67982e-06	135.219	163.737	132.965	461.416	273.054	325.129	up	Protein of unknown function
ANN01825	1.39251	0.00594331	18.3305	18.541	24.6994	60.6888	51.8261	47.8018	up	Similar to TRIP4: Activating signal cointegrator 1 (Homo sapiens OX%3D9606)		ANN01724	2.20189	2.47097e-06	35.7603	33.0013	64.2909	93.2395	288.485	226.531	up	Similar to PNLIPRP1: Inactive pancreatic lipase-related protein 1 (Homo sapiens OX%3D9606)
ANN01832	4.17779	5.52167e-10	5.78857	2.06011	4.63113	49.6545	71.0948	103.706	up	Similar to PCMT1: Protein-L-isoaspartate(D-aspartate) O-methyltransferase (Homo sapiens OX%3D9606)		ANN01731	2.65829	0.00169399	5.58755	2.53856	5.84463	28.6891	18.785	40.7429	up	Protein of unknown function
ANN01833	5.43013	1.00368e-20	3.85905	2.06011	6.17484	155.584	153.485	183.915	up	Similar to PIMT1: Protein-L-isoaspartate O-methyltransferase 1 (Arabidopsis thaliana OX%3D3702)		ANN01734	1.57284	0.00371225	31.2903	25.3856	26.3008	134.679	46.9626	66.0036	up	Similar to Pnliprp1: Inactive pancreatic lipase-related protein 1 (Mus musculus OX%3D10090)
ANN01836	1.64414	0.0417431	3.85905	10.3005	10.806	37.5167	18.6042	21.0652	up	Protein of unknown function		ANN01735	2.1939	0.00407883	4.47004	17.77	5.84463	62.9566	24.8231	40.7429	up	Similar to Mccc2: Probable methylcrotonoyl-CoA carboxylase beta chain%2C mitochondrial (Drosophila melanogaster OX%3D7227)
ANN01842	7.85389	1.65274e-12	0	0	3.08742	179.86	188.7	162.04	up	Similar to PCMT1: Protein-L-isoaspartate(D-aspartate) O-methyltransferase (Homo sapiens OX%3D9606)		ANN01736	3.41217	3.99974e-27	29.0553	49.502	23.3785	401.647	330.08	357.723	up	Similar to CYP4C1: Cytochrome P450 4C1 (Blaberus discoidalis OX%3D6981)
ANN01843	6.9556	2.06429e-37	1.92952	4.12021	6.17484	473.373	408.629	536.352	up	Similar to pcmt: Protein-L-isoaspartate(D-aspartate) O-methyltransferase (Danio rerio OX%3D7955)		ANN01737	3.91754	0.000717745	2.23502	2.53856	0	40.6428	13.4179	21.1863	up	Protein of unknown function
ANN01844	3.68771	0.000357179	0	0	9.26226	31.9996	33.8863	35.6488	up	Similar to pcmt: Protein-L-isoaspartate(D-aspartate) O-methyltransferase (Danio rerio OX%3D7955)		ANN01738	4.00556	1.8065e-08	0	10.1543	5.84463	121.132	65.7477	63.559	up	Similar to CYP4C1: Cytochrome P450 4C1 (Blaberus discoidalis OX%3D6981)
ANN01848	1.06231	0.0272614	57.8857	23.6912	37.049	87.1712	79.068	82.6404	up	Similar to Dys: Dystrophin%2C isoform D (Drosophila melanogaster OX%3D7227)		ANN01752	4.72657	1.25725e-21	4.47004	10.1543	10.2281	281.312	140.888	223.271	up	Similar to Oca2: P protein (Mus musculus OX%3D10090)
ANN01850	1.84921	2.42518e-12	146.644	170.989	138.934	476.683	528.892	641.678	up	Similar to Dbp73D: Probable ATP-dependent RNA helicase Dbp73D (Drosophila melanogaster OX%3D7227)		ANN01770	1.1288	5.28399e-09	488.352	502.636	447.114	1181.83	901.682	1063.39	up	Similar to U2af38: Splicing factor U2af 38 kDa subunit (Drosophila melanogaster OX%3D7227)
ANN01851	1.78431	2.94797e-08	47.2733	47.3825	52.4861	166.618	166.774	171.762	up	Protein of unknown function		ANN01773	2.05688	3.5776e-08	137.454	137.082	67.2132	264.577	562.21	599.736	up	Similar to SMC2: Structural maintenance of chromosomes protein 2 (Homo sapiens OX%3D9606)
ANN01860	5.36821	5.17932e-28	1.92952	8.24043	9.26226	276.962	241.191	243.06	up	Similar to PIMT1: Protein-L-isoaspartate O-methyltransferase 1 (Arabidopsis thaliana OX%3D3702)		ANN01784	3.74414	4.82462e-51	43.5829	45.6942	58.4463	634.347	730.604	601.366	up	Similar to celf1: CUGBP Elav-like family member 1 (Xenopus tropicalis OX%3D8364)
ANN01863	5.20353	3.02588e-09	0.964762	2.06011	3.08742	118.067	50.4972	44.561	up	Similar to slc46a1: Proton-coupled folate transporter (Xenopus laevis OX%3D8355)		ANN01818	3.20326	6.26557e-08	13.4101	2.53856	13.1504	57.3781	109.356	101.042	up	Similar to Dys: Dystrophin%2C isoform D (Drosophila melanogaster OX%3D7227)
ANN01864	7.87122	6.45423e-09	0	0	0	54.0682	50.4972	44.561	up	Similar to PCMT1: Protein-L-isoaspartate(D-aspartate) O-methyltransferase (Homo sapiens OX%3D9606)		ANN01822	1.06119	0.00791436	69.2857	44.4249	39.4512	92.4425	117.407	111.636	up	Similar to vir: Protein virilizer (Drosophila pseudoobscura pseudoobscura OX%3D46245)
ANN01865	5.00707	1.9008e-23	1.92952	8.24043	9.26226	194.204	190.693	208.221	up	Similar to pcmt: Protein-L-isoaspartate(D-aspartate) O-methyltransferase (Danio rerio OX%3D7955)		ANN01832	7.19713	1.01008e-06	0	0	0	54.9874	17.4433	30.9646	up	Similar to PCMT1: Protein-L-isoaspartate(D-aspartate) O-methyltransferase (Homo sapiens OX%3D9606)
ANN01866	6.55529	4.41338e-08	0	0	3.08742	67.3094	44.5173	108.567	up	Similar to pcmt: Protein-L-isoaspartate(D-aspartate) O-methyltransferase (Danio rerio OX%3D7955)		ANN01833	7.09238	5.50941e-09	0	2.53856	0	196.839	45.6208	104.302	up	Similar to PIMT1: Protein-L-isoaspartate O-methyltransferase 1 (Arabidopsis thaliana OX%3D3702)
ANN01867	5.09252	1.58359e-09	5.78857	0	0	78.3437	49.8328	94.7933	up	Protein of unknown function		ANN01842	8.14857	1.54368e-09	0	0	0	86.8641	42.9372	70.0779	up	Similar to PCMT1: Protein-L-isoaspartate(D-aspartate) O-methyltransferase (Homo sapiens OX%3D9606)
ANN01868	3.99797	0.0149638	5.78857	10.3005	259.343	1762.18	1001.97	1626.07	up	Similar to PCMT1: Protein-L-isoaspartate(D-aspartate) O-methyltransferase (Bos taurus OX%3D9913)		ANN01843	7.54762	9.76131e-18	2.23502	0	2.92231	464.603	110.698	375.65	up	Similar to pcmt: Protein-L-isoaspartate(D-aspartate) O-methyltransferase (Danio rerio OX%3D7955)
ANN01869	6.74243	6.55855e-09	0	0	3.08742	83.8609	65.1148	99.6545	up	Protein of unknown function		ANN01844	6.57961	1.56361e-05	0	0	0	20.7199	18.1142	28.5201	up	Similar to pcmt: Protein-L-isoaspartate(D-aspartate) O-methyltransferase (Danio rerio OX%3D7955)
ANN01870	3.51788	2.02824e-11	10.6124	4.12021	9.26226	88.2746	94.3501	89.9321	up	Similar to PCMT1: Protein-L-isoaspartate(D-aspartate) O-methyltransferase (Homo sapiens OX%3D9606)		ANN01848	1.78664	0.0142433	31.2903	2.53856	17.5339	74.9103	60.3805	43.1875	up	Similar to Dys: Dystrophin%2C isoform D (Drosophila melanogaster OX%3D7227)
ANN01871	6.49128	3.22683e-08	0	0	3.08742	82.7575	56.4772	70.4874	up	Protein of unknown function		ANN01850	1.74567	1.09967e-08	79.3433	124.39	124.198	478.948	307.941	309.646	up	Similar to Dbp73D: Probable ATP-dependent RNA helicase Dbp73D (Drosophila melanogaster OX%3D7227)
ANN01872	5.50196	4.54829e-09	4.82381	10.3005	49.3987	966.607	809.949	1092.96	up	Similar to PCMT1: Protein-L-isoaspartate(D-aspartate) O-methyltransferase (Gallus gallus OX%3D9031)		ANN01851	2.42575	2.62482e-05	7.82258	15.2314	10.2281	64.5504	42.9372	70.8927	up	Protein of unknown function
ANN01873	5.4843	7.43522e-33	1.92952	12.3606	12.3497	368.547	326.903	444.8	up	Protein of unknown function		ANN01860	6.62851	5.97453e-32	3.35253	2.53856	5.84463	290.875	418.638	422.912	up	Similar to PIMT1: Protein-L-isoaspartate O-methyltransferase 1 (Arabidopsis thaliana OX%3D3702)
ANN01874	5.39078	2.5235e-33	5.78857	9.27048	32.4179	692.956	528.892	632.766	up	Protein of unknown function		ANN01864	7.62109	1.59961e-11	0	0	2.92231	107.584	197.914	198.011	up	Similar to PCMT1: Protein-L-isoaspartate(D-aspartate) O-methyltransferase (Homo sapiens OX%3D9606)
ANN01875	5.88443	0.00398639	0	0	12.3497	315.582	190.693	197.689	up	Protein of unknown function		ANN01865	6.97891	8.91016e-35	6.70507	5.07713	0	334.706	689.009	554.104	up	Similar to pcmt: Protein-L-isoaspartate(D-aspartate) O-methyltransferase (Danio rerio OX%3D7955)
ANN01879	7.35557	7.30337e-15	0	4.12021	10.806	840.816	577.396	872.585	up	Protein of unknown function		ANN01866	9.60302	4.62652e-14	0	0	0	133.882	197.243	215.938	up	Similar to pcmt: Protein-L-isoaspartate(D-aspartate) O-methyltransferase (Danio rerio OX%3D7955)
ANN01880	1.47781	0.0267579	16.401	13.3907	13.8934	18.7584	46.5106	55.9038	up	Similar to xdh: Xanthine dehydrogenase (Dictyostelium discoideum OX%3D44689)		ANN01867	9.14851	1.0116e-12	0	0	0	107.584	132.837	158.897	up	Protein of unknown function
ANN01887	1.08615	0.000498582	493.958	398.631	662.252	1348.39	816.593	1132.66	up	Similar to Pnkp: Bifunctional polynucleotide phosphatase/kinase (Mus musculus OX%3D10090)		ANN01868	9.05077	8.68923e-17	0	12.6928	2.92231	2460.88	2935.83	2840.6	up	Similar to PCMT1: Protein-L-isoaspartate(D-aspartate) O-methyltransferase (Bos taurus OX%3D9913)
ANN01888	1.01937	0.000663204	136.996	211.161	148.196	312.272	344.843	350.006	up	Similar to PSR: Bifunctional arginine demethylase and lysyl-hydroxylase PSR (Drosophila melanogaster OX%3D7227)		ANN01869	8.79868	9.79854e-12	0	0	0	94.0364	114.052	105.117	up	Protein of unknown function
ANN01904	1.13028	0.0155236	76.2162	82.4043	27.7868	123.584	121.592	167.711	up	Similar to Crtc1: CREB-regulated transcription coactivator 1 (Mus musculus OX%3D10090)		ANN01870	5.51507	1.93301e-13	0	1.26928	7.30579	89.2549	152.293	114.895	up	Similar to PCMT1: Protein-L-isoaspartate(D-aspartate) O-methyltransferase (Homo sapiens OX%3D9606)
ANN01907	1.15254	0.00104801	107.089	92.7048	134.303	329.926	192.022	219.564	up	Similar to TKFC: Triokinase/FMN cyclase (Homo sapiens OX%3D9606)		ANN01871	7.22601	3.40775e-10	0	0	2.92231	87.661	182.483	113.265	up	Protein of unknown function
ANN01920	6.1711	1.86514e-07	3.85905	0	15.4371	456.821	469.093	409.961	up	Similar to se: Pyrimidodiazepine synthase (Drosophila melanogaster OX%3D7227)		ANN01872	8.50214	1.3167e-15	1.11751	0	10.2281	1162.7	1375.33	1404.82	up	Similar to PCMT1: Protein-L-isoaspartate(D-aspartate) O-methyltransferase (Gallus gallus OX%3D9031)
ANN01930	1.04733	0.00632534	86.8286	83.4343	72.5544	125.791	144.183	232.527	up	Similar to OsI_01383: Glucosidase 2 subunit beta (Oryza sativa subsp. indica OX%3D39946)		ANN01873	7.30885	5.28044e-08	0	7.61569	0	396.865	360.27	453.061	up	Protein of unknown function
ANN01934	4.41975	7.81092e-25	9.64762	6.18032	20.0682	265.927	233.217	227.666	up	Similar to Prep: Prolyl endopeptidase (Mus musculus OX%3D10090)		ANN01874	9.87118	4.04806e-20	0	2.53856	0	745.916	705.11	924.05	up	Protein of unknown function
ANN01943	3.46194	1.93147e-14	12.5419	9.27048	15.4371	163.308	135.545	105.326	up	Similar to Cyp4d2: Cytochrome P450 4d2 (Drosophila melanogaster OX%3D7227)		ANN01875	9.41198	1.25472e-13	0	0	0	174.525	139.546	165.416	up	Protein of unknown function
ANN01944	2.56373	4.04275e-10	44.379	39.142	61.7484	432.546	176.74	244.68	up	Similar to Cyp4c3: Cytochrome P450 4c3 (Drosophila melanogaster OX%3D7227)		ANN01878	1.3452	9.86288e-14	439.182	507.713	404.741	1186.61	1099.6	1149.77	up	Similar to XDH: Xanthine dehydrogenase (Calliphora vicina OX%3D7373)
ANN01949	1.17092	5.39115e-05	1134.56	1339.07	1483.51	3825.6	2092.98	2990.45	up	Similar to SSR2: Translocon-associated protein subunit beta (Bos taurus OX%3D9913)		ANN01879	9.98224	1.40825e-20	2.23502	0	0	936.379	744.693	876.788	up	Protein of unknown function
ANN01955	2.29378	5.38891e-18	217.071	309.016	259.343	1562.46	1076.39	1213.68	up	Similar to metl: Methyltransferase-like protein (Drosophila melanogaster OX%3D7227)		ANN01880	1.40901	0.0177689	18.9977	16.5007	24.8397	32.6737	78.4947	48.0767	up	Similar to xdh: Xanthine dehydrogenase (Dictyostelium discoideum OX%3D44689)
ANN01960	1.96086	0.033349	11.5771	6.18032	0	22.0687	23.2553	27.5468	up	Protein of unknown function		ANN01907	1.47878	6.16451e-07	78.2258	101.543	97.8975	195.245	289.156	287.645	up	Similar to TKFC: Triokinase/FMN cyclase (Homo sapiens OX%3D9606)
ANN01974	1.35917	4.69689e-05	74.2867	111.246	92.6226	297.927	205.976	210.652	up	Similar to Yju2: Splicing factor YJU2 (Mus musculus OX%3D10090)		ANN01920	10.2445	1.35032e-16	0	0	1.46116	600.877	504.513	557.363	up	Similar to se: Pyrimidodiazepine synthase (Drosophila melanogaster OX%3D7227)
ANN01976	1.55018	8.04013e-07	103.23	80.3442	126.584	243.859	330.225	328.131	up	Similar to Sptlc2: Serine palmitoyltransferase 2 (Mus musculus OX%3D10090)		ANN01923	1.19575	0.00173599	40.2304	48.2327	43.8347	119.538	95.267	88.0048	up	Similar to Sfmbt: Polycomb protein Sfmbt (Drosophila pseudoobscura pseudoobscura OX%3D46245)
ANN01978	1.6647	0.000137593	1451	5644.69	5364.39	16027.4	11300.1	12172.4	up	Similar to GlyP: Glycogen phosphorylase (Drosophila melanogaster OX%3D7227)		ANN01925	1.18565	0.000833498	74.8732	50.7713	52.6017	136.273	155.648	114.895	up	Similar to Sfmbt: Polycomb protein Sfmbt (Drosophila pseudoobscura pseudoobscura OX%3D46245)
ANN01980	1.49939	6.92843e-10	332.843	304.896	348.879	1082.47	795.996	910.664	up	Similar to Pdrg1: p53 and DNA damage-regulated protein 1 (Rattus norvegicus OX%3D10116)		ANN01930	1.23185	0.0019969	65.9331	52.0406	105.203	198.433	206.635	116.525	up	Similar to OsI_01383: Glucosidase 2 subunit beta (Oryza sativa subsp. indica OX%3D39946)
ANN01981	1.11118	0.000808216	243.12	143.177	263.974	543.992	377.4	481.259	up	Similar to CG8152: G patch domain and ankyrin repeat-containing protein 1 homolog (Drosophila melanogaster OX%3D7227)		ANN01934	7.64216	7.5376e-22	2.23502	0	2.92231	260.592	373.017	379.724	up	Similar to Prep: Prolyl endopeptidase (Mus musculus OX%3D10090)
ANN01986	3.09292	5.33424e-17	582.716	642.753	606.678	2281.9	6414.48	6933.69	up	Similar to me31B: ATP-dependent RNA helicase me31b (Drosophila melanogaster OX%3D7227)		ANN01943	2.9175	1.39099e-07	30.1728	5.07713	13.1504	169.744	101.305	100.228	up	Similar to Cyp4d2: Cytochrome P450 4d2 (Drosophila melanogaster OX%3D7227)
ANN01987	2.30699	4.61294e-06	33.7667	32.9617	12.3497	188.687	77.0747	134.493	up	Similar to nas-4: Zinc metalloproteinase nas-4 (Caenorhabditis elegans OX%3D6239)		ANN01944	1.89827	3.8622e-08	60.3456	50.7713	73.0579	313.986	191.876	179.269	up	Similar to Cyp4c3: Cytochrome P450 4c3 (Drosophila melanogaster OX%3D7227)
ANN01992	1.61752	0.023771	9.64762	26.7814	9.26226	24.2755	42.524	74.5384	up	Similar to LIPH: Lipase member H (Oryctolagus cuniculus OX%3D9986)		ANN01949	1.34996	3.28261e-15	1216.97	1100.47	1176.23	3037.85	2571.54	3297.73	up	Similar to SSR2: Translocon-associated protein subunit beta (Bos taurus OX%3D9913)
ANN02009	1.11709	0.0155531	54.9914	28.8415	37.049	77.2403	75.7458	110.187	up	Similar to trmt44: Probable tRNA (uracil-O(2)-)-methyltransferase (Xenopus laevis OX%3D8355)		ANN01955	1.4146	6.45e-12	328.548	307.166	324.377	991.367	715.844	853.157	up	Similar to metl: Methyltransferase-like protein (Drosophila melanogaster OX%3D7227)
ANN02043	1.20574	0.000134195	146.644	134.937	168.264	250.479	354.809	428.596	up	Similar to UBR7: Putative E3 ubiquitin-protein ligase UBR7 (Homo sapiens OX%3D9606)		ANN01974	1.21373	1.16775e-05	102.811	124.39	94.9752	262.983	209.99	275.422	up	Similar to Yju2: Splicing factor YJU2 (Mus musculus OX%3D10090)
ANN02045	1.66617	8.32768e-07	127.349	204.981	279.412	765.782	522.912	644.919	up	Similar to tbp: TATA-box-binding protein (Xenopus laevis OX%3D8355)		ANN01975	2.10187	0.0279727	2.23502	10.1543	5.84463	31.8767	10.0634	35.8538	up	Similar to Fgd6: FYVE%2C RhoGEF and PH domain-containing protein 6 (Mus musculus OX%3D10090)
ANN02048	1.06292	0.00852367	51.1324	110.216	94.1663	187.584	140.861	204.17	up	Protein of unknown function		ANN01976	2.55382	1.21107e-13	53.6405	43.1556	29.2231	307.611	190.534	248.532	up	Similar to Sptlc2: Serine palmitoyltransferase 2 (Mus musculus OX%3D10090)
ANN02049	1.69519	4.8087e-07	238.296	428.502	478.55	1500.67	883.037	1319.82	up	Similar to ACAA2: 3-ketoacyl-CoA thiolase%2C mitochondrial (Homo sapiens OX%3D9606)		ANN01978	1.43207	2.39952e-22	4331.47	4203.86	4348.4	12708.5	10899.4	11157	up	Similar to GlyP: Glycogen phosphorylase (Drosophila melanogaster OX%3D7227)
ANN02054	1.18202	4.49035e-06	186.199	165.839	202.226	459.028	396.005	401.049	up	Similar to Pym: Partner of Y14 and mago (Bombyx mori OX%3D7091)		ANN01980	1.10062	3.49738e-09	467.12	533.099	495.332	1134.81	937.24	1135.1	up	Similar to Pdrg1: p53 and DNA damage-regulated protein 1 (Rattus norvegicus OX%3D10116)
ANN02056	1.32041	4.21597e-05	96.4762	120.516	69.467	240.548	223.915	256.023	up	Similar to STOML2: Stomatin-like protein 2%2C mitochondrial (Homo sapiens OX%3D9606)		ANN01986	3.73611	1.87394e-87	429.124	521.675	580.079	6094.04	7889.72	6389.31	up	Similar to me31B: ATP-dependent RNA helicase me31b (Drosophila melanogaster OX%3D7227)
ANN02058	3.39914	1.00418e-20	33.7667	43.2622	20.0682	263.72	426.569	350.816	up	Similar to Trim71: E3 ubiquitin-protein ligase TRIM71 (Mus musculus OX%3D10090)		ANN01992	1.73201	0.000827536	31.2903	33.0013	20.4562	46.2213	121.432	114.895	up	Similar to LIPH: Lipase member H (Oryctolagus cuniculus OX%3D9986)
ANN02060	1.94645	4.66181e-19	346.35	334.767	362.772	1445.5	1210.6	1366	up	Similar to Vat1l: Synaptic vesicle membrane protein VAT-1 homolog-like (Mus musculus OX%3D10090)		ANN02025	1.24696	0.0063572	36.8779	30.4628	27.762	57.3781	93.9252	74.967	up	Protein of unknown function
ANN02073	2.22907	8.54607e-13	121.56	104.035	188.333	708.404	506.966	712.976	up	Similar to EME1: Crossover junction endonuclease EME1 (Pongo abelii OX%3D9601)		ANN02045	3.29383	5.59196e-06	16.7627	16.5007	13.1504	350.644	34.2156	71.7076	up	Similar to tbp: TATA-box-binding protein (Xenopus laevis OX%3D8355)
ANN02099	1.0089	0.0053522	96.4762	83.4343	75.6418	222.893	161.458	132.873	up	Similar to RpA-70: Replication protein A 70 kDa DNA-binding subunit (Drosophila melanogaster OX%3D7227)		ANN02048	2.46529	0.0171235	6.70507	21.5778	2.92231	133.882	6.70894	32.5944	up	Protein of unknown function
ANN02103	1.22542	8.53776e-05	89.7229	129.787	112.691	292.41	217.271	267.366	up	Similar to trmt10c: Mitochondrial ribonuclease P protein 1 homolog (Drosophila melanogaster OX%3D7227)		ANN02049	4.07397	0.00290299	11.1751	49.502	26.3008	993.757	30.8611	439.209	up	Similar to ACAA2: 3-ketoacyl-CoA thiolase%2C mitochondrial (Homo sapiens OX%3D9606)
ANN02106	1.48402	0.00572028	21.2248	22.6612	13.8934	48.551	43.8529	71.2976	up	Similar to METTL26: Methyltransferase-like 26 (Bos taurus OX%3D9913)		ANN02054	1.2866	2.57734e-09	155.334	163.737	165.111	410.413	375.03	395.207	up	Similar to Pym: Partner of Y14 and mago (Bombyx mori OX%3D7091)
ANN02109	1.16889	2.68989e-05	317.407	288.415	341.16	893.781	560.121	675.706	up	Similar to METTL26: Methyltransferase-like 26 (Bos taurus OX%3D9913)		ANN02056	1.05868	0.00050853	198.917	172.622	303.921	344.269	542.754	516.62	up	Similar to STOML2: Stomatin-like protein 2%2C mitochondrial (Homo sapiens OX%3D9606)
ANN02113	1.69427	0.00748114	19.2952	32.9617	4.63113	68.4128	71.7592	48.612	up	Similar to TY3B-I: Transposon Ty3-I Gag-Pol polyprotein (Saccharomyces cerevisiae (strain ATCC 204508 / S288c) OX%3D559292)		ANN02058	4.2749	2.49875e-35	11.1751	17.77	24.8397	365.786	330.08	323.499	up	Similar to Trim71: E3 ubiquitin-protein ligase TRIM71 (Mus musculus OX%3D10090)
ANN02117	3.00957	4.33528e-06	5.78857	6.18032	10.806	28.6893	76.4103	72.1078	up	Similar to Racgap1: Rac GTPase-activating protein 1 (Mus musculus OX%3D10090)		ANN02060	1.92883	2.53941e-22	385.541	323.667	359.445	1124.45	1516.89	1428.45	up	Similar to Vat1l: Synaptic vesicle membrane protein VAT-1 homolog-like (Mus musculus OX%3D10090)
ANN02118	2.82365	0.00132484	0	4.12021	18.5245	59.5854	33.2219	56.714	up	Similar to SLC25A20: Mitochondrial carnitine/acylcarnitine carrier protein (Macaca fascicularis OX%3D9541)		ANN02073	2.22954	9.86288e-14	98.341	72.3491	135.888	580.157	363.625	489.73	up	Similar to EME1: Crossover junction endonuclease EME1 (Pongo abelii OX%3D9601)
ANN02128	1.52771	3.09504e-10	639.637	638.633	628.29	2211.28	1477.04	1811.61	up	Similar to PSME3: Proteasome activator complex subunit 3 (Pongo abelii OX%3D9601)		ANN02099	1.28071	3.59137e-05	69.2857	60.9256	68.6744	140.258	163.698	179.269	up	Similar to RpA-70: Replication protein A 70 kDa DNA-binding subunit (Drosophila melanogaster OX%3D7227)
ANN02142	1.92336	7.58621e-06	33.7667	39.142	16.9808	99.309	136.21	110.997	up	Protein of unknown function		ANN02101	1.03711	0.0192624	34.6428	55.8484	40.9124	76.5042	117.407	74.967	up	Similar to RpA-70: Replication protein A 70 kDa DNA-binding subunit (Drosophila melanogaster OX%3D7227)
ANN02143	1.26622	0.00282037	29.9076	42.2322	50.9424	78.3437	114.283	99.6545	up	Protein of unknown function		ANN02106	1.15637	0.0414341	21.2327	25.3856	20.4562	67.7381	47.6335	34.2241	up	Similar to METTL26: Methyltransferase-like 26 (Bos taurus OX%3D9913)
ANN02144	1.29902	6.18259e-06	132.172	107.126	131.215	351.995	269.762	290.051	up	Similar to ippk: Inositol-pentakisphosphate 2-kinase (Danio rerio OX%3D7955)		ANN02113	2.65032	5.17325e-05	6.70507	20.3085	2.92231	70.9257	67.0894	51.3361	up	Similar to TY3B-I: Transposon Ty3-I Gag-Pol polyprotein (Saccharomyces cerevisiae (strain ATCC 204508 / S288c) OX%3D559292)
ANN02145	1.95848	2.52666e-05	25.0838	27.8114	16.9808	121.378	66.4437	88.3117	up	Similar to Psmd10: 26S proteasome non-ATPase regulatory subunit 10 (Rattus norvegicus OX%3D10116)		ANN02117	5.40625	1.39192e-08	0	5.07713	0	42.2367	97.2797	75.7819	up	Similar to Racgap1: Rac GTPase-activating protein 1 (Mus musculus OX%3D10090)
ANN02156	4.01146	3.39031e-13	7.7181	3.09016	9.26226	130.205	99.6656	85.071	up	Similar to Tret1: Facilitated trehalose transporter Tret1 (Culex quinquefasciatus OX%3D7176)		ANN02118	6.30084	1.34662e-07	2.23502	0	0	68.535	55.0133	74.1522	up	Similar to SLC25A20: Mitochondrial carnitine/acylcarnitine carrier protein (Macaca fascicularis OX%3D9541)
ANN02158	7.52915	8.26213e-56	1.92952	18.541	12.3497	2803.82	1292.33	1860.22	up	Protein of unknown function		ANN02128	1.38693	2.92224e-12	606.808	605.448	707.2	1977.15	1402.84	1637.87	up	Similar to PSME3: Proteasome activator complex subunit 3 (Pongo abelii OX%3D9601)
ANN02165	1.07492	0.00116858	206.459	211.161	185.245	278.065	443.844	547.695	up	Protein of unknown function		ANN02142	4.08947	5.1564e-13	4.47004	7.61569	5.84463	124.319	80.5073	98.5979	up	Protein of unknown function
ANN02169	1.41249	0.000834128	46.3086	29.8715	32.4179	95.9987	114.948	79.3996	up	Similar to Psmd10: 26S proteasome non-ATPase regulatory subunit 10 (Rattus norvegicus OX%3D10116)		ANN02143	2.86433	2.03518e-08	6.70507	21.5778	11.6893	101.209	108.685	79.0413	up	Protein of unknown function
ANN02174	3.08765	1.52453e-11	27.9781	8.24043	18.5245	180.963	156.807	129.632	up	Similar to Tret1: Facilitated trehalose transporter Tret1 (Aedes aegypti OX%3D7159)		ANN02145	2.68804	0.000597543	4.47004	8.88498	17.5339	127.507	22.8104	45.6321	up	Similar to Psmd10: 26S proteasome non-ATPase regulatory subunit 10 (Rattus norvegicus OX%3D10116)
ANN02175	7.9521	3.6456e-11	8.68286	20.6011	0	3970.15	1486.35	1915.31	up	Similar to pol: RNA-directed DNA polymerase from mobile element jockey (Drosophila melanogaster OX%3D7227)		ANN02156	2.20974	0.0372655	12.2926	6.34641	7.30579	94.8333	4.02537	22.0012	up	Similar to Tret1: Facilitated trehalose transporter Tret1 (Culex quinquefasciatus OX%3D7176)
ANN02182	2.03404	2.03124e-15	236.367	364.639	364.316	1305.36	1344.82	1295.51	up	Similar to FASN: Fatty acid synthase (Gallus gallus OX%3D9031)		ANN02158	9.06624	1.6273e-54	0	5.07713	5.84463	2519.06	1329.04	1639.5	up	Protein of unknown function
ANN02193	1.12015	0.000471731	112.877	84.4644	92.6226	174.342	233.882	221.995	up	Protein of unknown function		ANN02165	3.79241	7.19176e-16	3.35253	25.3856	24.8397	291.672	223.408	211.863	up	Protein of unknown function
ANN02195	1.74903	9.15754e-07	82.0048	110.216	103.429	443.58	211.291	339.474	up	Similar to LSM11: U7 snRNA-associated Sm-like protein LSm11 (Homo sapiens OX%3D9606)		ANN02169	1.19555	0.00423833	74.8732	74.8877	33.6066	104.396	154.977	162.972	up	Similar to Psmd10: 26S proteasome non-ATPase regulatory subunit 10 (Rattus norvegicus OX%3D10116)
ANN02196	1.95647	0.0126085	9.64762	12.3606	3.08742	16.5515	33.8863	49.4222	up	Protein of unknown function		ANN02174	2.51156	4.52163e-13	39.1129	35.5399	23.3785	177.713	166.382	220.012	up	Similar to Tret1: Facilitated trehalose transporter Tret1 (Aedes aegypti OX%3D7159)
ANN02201	1.13569	8.67182e-06	200.67	167.899	188.333	393.926	392.018	437.508	up	Similar to SPBC1539.06: Putative acyl-CoA-binding protein (Schizosaccharomyces pombe (strain 972 / ATCC 24843) OX%3D284812)		ANN02175	8.57119	6.87593e-62	1.11751	3.80785	10.2281	2314.25	1214.99	1846.47	up	Similar to pol: RNA-directed DNA polymerase from mobile element jockey (Drosophila melanogaster OX%3D7227)
ANN02220	1.52866	4.82202e-05	65.6038	33.9918	57.1173	157.791	153.485	140.165	up	Similar to pol: RNA-directed DNA polymerase from mobile element jockey (Drosophila melanogaster OX%3D7227)		ANN02182	2.18645	9.14967e-23	217.915	239.894	260.086	1338.03	1045.92	880.048	up	Similar to FASN: Fatty acid synthase (Gallus gallus OX%3D9031)
ANN02230	2.11619	0.00193585	5.78857	9.27048	7.71855	29.7927	39.2018	29.1672	up	Similar to mst: Protein misato (Drosophila melanogaster OX%3D7227)		ANN02193	1.34417	5.41688e-06	87.1658	77.4262	116.893	211.183	223.408	277.867	up	Protein of unknown function
ANN02241	1.47338	4.15776e-06	65.6038	78.2841	81.8166	241.652	172.754	211.462	up	Similar to PIAS3: E3 SUMO-protein ligase PIAS3 (Homo sapiens OX%3D9606)		ANN02196	2.13557	7.53585e-05	11.1751	17.77	10.2281	54.1905	56.3551	61.9293	up	Protein of unknown function
ANN02242	2.31081	3.50871e-27	1095	1330.83	1238.06	6836.87	5653.7	5687.6	up	Similar to T-complex protein 1 subunit delta (Ochlerotatus triseriatus OX%3D7162)		ANN02201	1.49635	6.11739e-05	101.693	139.621	92.0529	470.182	191.205	280.311	up	Similar to SPBC1539.06: Putative acyl-CoA-binding protein (Schizosaccharomyces pombe (strain 972 / ATCC 24843) OX%3D284812)
ANN02245	2.45826	6.89825e-13	44.379	67.9835	57.1173	380.684	225.244	325.7	up	Protein of unknown function		ANN02202	2.56472	1.45199e-06	27.9378	35.5399	37.9901	384.912	91.2416	123.044	up	Similar to acbp-1: Acyl-CoA-binding protein homolog 1 (Caenorhabditis elegans OX%3D6239)
ANN02246	2.20924	2.14371e-12	65.6038	83.4343	47.855	324.409	271.755	323.27	up	Similar to vrk1: Serine/threonine-protein kinase VRK1 (Danio rerio OX%3D7955)		ANN02215	1.18032	0.000140981	450.357	505.174	489.488	616.815	1126.43	1531.12	up	Similar to Serpini1: Neuroserpin (Rattus norvegicus OX%3D10116)
ANN02250	2.49646	1.39706e-17	4114.71	6129.85	6264.38	40230.1	21897.9	31025.8	up	Similar to RpL9: 60S ribosomal protein L9 (Drosophila melanogaster OX%3D7227)		ANN02220	1.75194	0.000668465	25.7028	25.3856	20.4562	110.772	44.9499	86.375	up	Similar to pol: RNA-directed DNA polymerase from mobile element jockey (Drosophila melanogaster OX%3D7227)
ANN02255	1.78698	0.000189517	32.8019	20.6011	44.7676	162.205	79.068	94.7933	up	Similar to msto1: Protein misato homolog 1 (Danio rerio OX%3D7955)		ANN02230	1.80497	0.0290692	20.1152	22.8471	48.2182	11.9538	220.053	84.7453	up	Similar to mst: Protein misato (Drosophila melanogaster OX%3D7227)
ANN02265	1.02207	0.000421898	381.081	284.295	284.043	793.368	614.604	524.199	up	Similar to scat: Vacuolar protein sorting-associated protein 54 (Drosophila melanogaster OX%3D7227)		ANN02234	1.30539	8.4367e-11	428.007	550.869	384.284	1122.06	1086.18	1162.8	up	Similar to Serpini1: Neuroserpin (Rattus norvegicus OX%3D10116)
ANN02271	6.09878	3.39458e-36	1.92952	7.21037	9.26226	349.788	372.085	461.004	up	Similar to X-element\ORF2: Probable RNA-directed DNA polymerase from transposon X-element (Drosophila melanogaster OX%3D7227)		ANN02241	1.51369	9.87859e-10	100.576	107.889	121.276	278.125	328.738	332.462	up	Similar to PIAS3: E3 SUMO-protein ligase PIAS3 (Homo sapiens OX%3D9606)
ANN02272	3.86499	4.32034e-06	5.78857	0	3.08742	37.5167	33.8863	59.1446	up	Protein of unknown function		ANN02242	2.14049	1.0515e-51	1259.43	1259.13	1309.2	5810.33	5457.06	5607.86	up	Similar to T-complex protein 1 subunit delta (Ochlerotatus triseriatus OX%3D7162)
ANN02273	3.88798	1.80061e-12	3.85905	8.24043	6.17484	86.0678	91.0279	91.5525	up	Similar to PCM: Protein-L-isoaspartate O-methyltransferase (Triticum aestivum OX%3D4565)		ANN02245	2.56176	3.69744e-05	15.6452	44.4249	10.2281	247.045	68.4312	101.042	up	Protein of unknown function
ANN02274	6.0429	4.31153e-26	1.92952	6.18032	3.08742	231.721	295.01	217.133	up	Similar to pcmt: Protein-L-isoaspartate(D-aspartate) O-methyltransferase (Danio rerio OX%3D7955)		ANN02246	2.09015	4.63929e-06	29.0553	46.9634	24.8397	217.559	97.2797	115.71	up	Similar to vrk1: Serine/threonine-protein kinase VRK1 (Danio rerio OX%3D7955)
ANN02278	6.38888	1.46805e-08	3.85905	3.09016	40.1365	1326.33	1062.44	1473.75	up	Similar to PCMT1: Protein-L-isoaspartate(D-aspartate) O-methyltransferase (Bos taurus OX%3D9913)		ANN02249	2.66712	0.00109767	8.94009	7.61569	2.92231	70.1288	16.7724	39.1132	up	Protein of unknown function
ANN02285	5.2299	0.00282037	1.92952	0	27.7868	528.544	227.238	339.474	up	Similar to pcmt: Protein-L-isoaspartate(D-aspartate) O-methyltransferase (Danio rerio OX%3D7955)		ANN02250	1.6248	9.4809e-29	8024.85	7335.18	7225.42	23596.8	21502.2	24559	up	Similar to RpL9: 60S ribosomal protein L9 (Drosophila melanogaster OX%3D7227)
ANN02286	5.1125	8.45827e-29	5.78857	6.18032	18.5245	374.064	244.513	362.969	up	Similar to PCMT1: Protein-L-isoaspartate(D-aspartate) O-methyltransferase (Bos taurus OX%3D9913)		ANN02255	2.33015	6.68006e-08	15.6452	17.77	30.6843	102.802	97.2797	118.155	up	Similar to msto1: Protein misato homolog 1 (Danio rerio OX%3D7955)
ANN02287	7.26111	2.75613e-07	0	0	0	35.3099	33.2219	29.1672	up	Protein of unknown function		ANN02271	8.17707	5.30234e-26	0	5.07713	0	479.745	497.804	490.545	up	Similar to X-element\ORF2: Probable RNA-directed DNA polymerase from transposon X-element (Drosophila melanogaster OX%3D7227)
ANN02294	3.89865	4.04457e-40	40.52	53.5628	35.5053	552.82	720.25	674.896	up	Similar to dpa: DNA replication licensing factor MCM4 (Drosophila melanogaster OX%3D7227)		ANN02272	5.00401	1.30437e-09	2.23502	1.26928	2.92231	54.9874	73.7984	74.967	up	Protein of unknown function
ANN02327	1.18562	0.000709644	89.7229	158.628	132.759	314.478	216.607	335.423	up	Similar to Slc1a2: Excitatory amino acid transporter 2 (Mus musculus OX%3D10090)		ANN02273	6.43661	1.67358e-14	0	0	5.84463	120.335	141.559	184.973	up	Similar to PCM: Protein-L-isoaspartate O-methyltransferase (Triticum aestivum OX%3D4565)
ANN02340	1.04338	2.87522e-05	525.795	693.226	719.369	1439.98	1168.75	1383.82	up	Similar to tsu: RNA-binding protein 8A (Drosophila melanogaster OX%3D7227)		ANN02274	10.511	6.50694e-17	0	0	0	310.798	257.623	458.766	up	Similar to pcmt: Protein-L-isoaspartate(D-aspartate) O-methyltransferase (Danio rerio OX%3D7955)
ANN02342	6.6136	2.28364e-07	6.75333	0	0	208.549	233.882	263.315	up	Similar to KIF20A: Kinesin-like protein KIF20A (Bos taurus OX%3D9913)		ANN02278	9.10004	8.7287e-45	4.47004	0	2.92231	1714.17	1041.9	1407.26	up	Similar to PCMT1: Protein-L-isoaspartate(D-aspartate) O-methyltransferase (Bos taurus OX%3D9913)
ANN02356	5.66294	4.30657e-06	1.92952	2.06011	30.8742	581.509	525.57	613.321	up	Protein of unknown function		ANN02284	1.97838	3.63764e-05	25.7028	19.0392	35.0678	151.415	69.773	92.079	up	Similar to Mcrs1: Microspherule protein 1 (Mus musculus OX%3D10090)
ANN02357	3.90914	0.019999	0	2.06011	0	8.82746	18.6042	5.6714	up	Protein of unknown function		ANN02285	9.28455	9.12055e-18	0	0	2.92231	422.367	575.627	589.143	up	Similar to pcmt: Protein-L-isoaspartate(D-aspartate) O-methyltransferase (Danio rerio OX%3D7955)
ANN02358	5.3167	3.4877e-06	3.85905	2.06011	33.9616	509.786	448.495	592.256	up	Protein of unknown function		ANN02286	5.01332	8.27133e-26	13.4101	10.1543	16.0727	180.104	487.069	607.07	up	Similar to PCMT1: Protein-L-isoaspartate(D-aspartate) O-methyltransferase (Bos taurus OX%3D9913)
ANN02361	5.06093	6.2386e-30	17.3657	2.06011	18.5245	409.374	384.709	437.508	up	Protein of unknown function		ANN02287	5.39419	2.61268e-07	0	3.80785	0	45.4244	53.6716	61.1144	up	Protein of unknown function
ANN02362	4.80765	1.65088e-05	19.2952	7.21037	114.235	1292.12	1292.33	1329.54	up	Protein of unknown function		ANN02294	4.03998	2.43108e-52	34.6428	35.5399	29.2231	572.187	562.88	506.842	up	Similar to dpa: DNA replication licensing factor MCM4 (Drosophila melanogaster OX%3D7227)
ANN02363	1.81734	1.98476e-09	95.5114	72.1037	69.467	296.823	241.191	302.204	up	Similar to dpp: Protein decapentaplegic (Tribolium castaneum OX%3D7070)		ANN02331	1.03348	1.97438e-05	160.922	189.123	138.81	345.066	313.308	343.87	up	Similar to Slc1a2: Excitatory amino acid transporter 2 (Mus musculus OX%3D10090)
ANN02364	4.55208	1.39476e-07	1.92952	4.12021	0	35.3099	75.0814	43.7508	up	Protein of unknown function		ANN02342	5.78993	1.88724e-23	1.11751	7.61569	2.92231	208.793	222.737	202.085	up	Similar to KIF20A: Kinesin-like protein KIF20A (Bos taurus OX%3D9913)
ANN02365	6.32542	5.53674e-05	0	0	0	12.1378	19.2687	19.4448	up	Protein of unknown function		ANN02343	2.11776	0.0327661	4.47004	5.07713	2.92231	11.1569	22.1395	21.1863	up	Similar to Trpc7: Short transient receptor potential channel 7 (Mus musculus OX%3D10090)
ANN02370	1.48283	5.47581e-11	804.611	953.829	720.913	2121.9	2473.7	2338.24	up	Protein of unknown function		ANN02355	1.43676	0.0186267	17.8802	11.4235	40.9124	42.2367	73.1275	72.5224	up	Similar to Ank3: Ankyrin-3 (Rattus norvegicus OX%3D10116)
ANN02375	1.55926	4.49585e-11	266.274	256.483	242.363	788.955	657.128	811.82	up	Similar to dbe: KRR1 small subunit processome component homolog (Drosophila grimshawi OX%3D7222)		ANN02356	8.69667	8.58157e-30	2.23502	0	2.92231	697.304	723.224	683.667	up	Protein of unknown function
ANN02390	5.10853	1.11802e-12	1.92952	2.06011	4.63113	108.136	104.981	64.816	up	Similar to Allergen Tha p 1 (Thaumetopoea pityocampa OX%3D208016)		ANN02357	4.05872	0.0110462	2.23502	0	0	16.7353	13.4179	10.5932	up	Protein of unknown function
ANN02431	1.92472	1.57671e-05	27.0133	16.4809	21.6119	79.4472	91.0279	76.969	up	Similar to FRS2: Fibroblast growth factor receptor substrate 2 (Homo sapiens OX%3D9606)		ANN02358	7.84159	4.39043e-44	0	2.53856	8.76694	714.039	771.529	862.121	up	Protein of unknown function
ANN02433	5.10886	8.74942e-11	0	5.15027	1.54371	62.8957	91.0279	79.3996	up	Similar to Myrosinase 1 (Brevicoryne brassicae OX%3D69196)		ANN02361	6.73977	2.03674e-47	4.47004	5.07713	13.1504	497.277	807.086	1029.98	up	Protein of unknown function
ANN02434	8.36065	4.73242e-10	0	0	0	44.1373	85.7124	78.5894	up	Similar to Retrovirus-related Pol polyprotein from type-1 retrotransposable element R1 (Fragment) (Bradysia coprophila OX%3D38358)		ANN02362	7.73639	3.54679e-60	4.47004	2.53856	8.76694	1258.33	974.139	1023.46	up	Protein of unknown function
ANN02442	1.48739	0.0300511	9.64762	23.6912	6.17484	37.5167	35.8796	39.6998	up	Similar to TARBP1: Probable methyltransferase TARBP1 (Homo sapiens OX%3D9606)		ANN02363	1.63193	7.7074e-06	71.5207	38.0785	87.6694	246.248	185.167	178.454	up	Similar to dpp: Protein decapentaplegic (Tribolium castaneum OX%3D7070)
ANN02446	1.00278	0.0010108	292.323	220.431	196.051	393.926	582.047	446.42	up	Similar to grp: Serine/threonine-protein kinase grp (Drosophila melanogaster OX%3D7227)		ANN02364	6.00776	1.14632e-06	2.23502	0	0	70.9257	40.2537	49.7064	up	Protein of unknown function
ANN02455	7.31305	1.25343e-06	0	0	0	13.2412	21.262	66.4364	up	Protein of unknown function		ANN02365	6.7193	6.61274e-06	0	0	0	23.9076	28.1776	22.0012	up	Protein of unknown function
ANN02472	3.89847	3.49134e-22	16.401	10.3005	26.2431	296.823	205.976	262.505	up	Similar to Cks30A: Cyclin-dependent kinases regulatory subunit (Drosophila melanogaster OX%3D7227)		ANN02370	1.5717	2.39378e-22	860.483	762.839	867.927	2374.02	2661.44	2368.79	up	Protein of unknown function
ANN02486	3.89445	3.11907e-12	9.64762	5.15027	3.08742	79.4472	97.6723	101.275	up	Similar to mastl: Serine/threonine-protein kinase greatwall (Xenopus tropicalis OX%3D8364)		ANN02375	1.35137	9.22626e-14	277.143	283.05	283.464	727.587	716.515	708.112	up	Similar to dbe: KRR1 small subunit processome component homolog (Drosophila grimshawi OX%3D7222)
ANN02491	1.60084	2.55297e-13	551.844	619.062	662.252	2014.87	1852.45	1689.27	up	Similar to Gld: Glucose dehydrogenase [FAD%2C quinone] (Drosophila melanogaster OX%3D7227)		ANN02390	3.83693	2.27125e-07	4.47004	0	11.6893	43.0336	85.8745	94.5236	up	Similar to Allergen Tha p 1 (Thaumetopoea pityocampa OX%3D208016)
ANN02502	2.26451	4.67307e-17	4943.44	6699.47	6394.05	37413	21764.3	27486.8	up	Similar to RpS19a: 40S ribosomal protein S19a (Drosophila melanogaster OX%3D7227)		ANN02409	1.25174	0.0013554	156.452	165.007	103.742	521.185	194.559	299.053	up	Similar to FBXW9: F-box/WD repeat-containing protein 9 (Bos taurus OX%3D9913)
ANN02504	6.68993	6.94231e-41	2.89429	3.09016	12.3497	701.783	498.328	489.361	up	Similar to MIMI_L93: Putative ankyrin repeat protein L93 (Acanthamoeba polyphaga mimivirus OX%3D212035)		ANN02431	1.35558	0.00527721	33.5253	19.0392	39.4512	102.006	63.735	69.263	up	Similar to FRS2: Fibroblast growth factor receptor substrate 2 (Homo sapiens OX%3D9606)
ANN02516	1.54741	2.84004e-05	76.2162	53.5628	40.1365	178.756	142.19	181.485	up	Similar to GVQW3: Protein GVQW3 (Homo sapiens OX%3D9606)		ANN02433	3.44213	2.3602e-10	5.58755	5.07713	17.5339	84.4734	107.343	105.117	up	Similar to Myrosinase 1 (Brevicoryne brassicae OX%3D69196)
ANN02539	7.65725	3.48539e-12	5.78857	0	12.3497	1729.08	758.123	1054.88	up	Protein of unknown function		ANN02442	1.22562	0.0321779	15.6452	16.5007	26.3008	43.8305	38.9119	52.9658	up	Similar to TARBP1: Probable methyltransferase TARBP1 (Homo sapiens OX%3D9606)
ANN02540	1.11253	6.08444e-07	1679.65	1491.52	1674.93	3656.78	2981.33	3840.35	up	Similar to smo-1: Small ubiquitin-related modifier (Caenorhabditis elegans OX%3D6239)		ANN02444	1.78903	5.94757e-08	64.8156	41.8863	84.7471	235.888	191.205	232.235	up	Protein of unknown function
ANN02563	2.49354	0.000324368	7.7181	4.12021	7.71855	28.6893	45.8462	34.0284	up	Protein of unknown function		ANN02446	1.2502	7.27805e-10	252.557	239.894	255.702	580.157	660.831	537.807	up	Similar to grp: Serine/threonine-protein kinase grp (Drosophila melanogaster OX%3D7227)
ANN02565	1.56181	0.00145762	25.0838	19.571	32.4179	52.9648	99.0011	72.1078	up	Similar to lig: Protein lingerer (Aedes aegypti OX%3D7159)		ANN02455	6.63677	4.07201e-05	0	0	0	41.4398	6.70894	22.0012	up	Protein of unknown function
ANN02570	2.07741	2.32681e-08	36.661	30.9016	40.1365	115.86	162.787	172.572	up	Protein of unknown function		ANN02472	2.84394	2.06639e-18	27.9378	53.3099	30.6843	247.045	280.434	275.422	up	Similar to Cks30A: Cyclin-dependent kinases regulatory subunit (Drosophila melanogaster OX%3D7227)
ANN02576	5.67624	3.6433e-14	3.85905	2.06011	3.08742	284.686	102.988	75.3486	up	Protein of unknown function		ANN02486	4.17555	2.15011e-14	11.1751	5.07713	2.92231	108.381	144.913	105.932	up	Similar to mastl: Serine/threonine-protein kinase greatwall (Xenopus tropicalis OX%3D8364)
ANN02588	3.64534	0.0367138	0	2.06011	0	11.0343	4.65106	12.153	up	Similar to Bambi: BMP and activin membrane-bound inhibitor homolog (Mus musculus OX%3D10090)		ANN02491	1.44673	1.94642e-16	530.818	665.104	562.545	1688.67	1559.83	1544.16	up	Similar to Gld: Glucose dehydrogenase [FAD%2C quinone] (Drosophila melanogaster OX%3D7227)
ANN02590	2.26394	3.37888e-14	3539.71	4538.42	5946.37	30122.6	17174.4	20052.4	up	Similar to RpL44: 60S ribosomal protein L44 (Ochlerotatus triseriatus OX%3D7162)		ANN02502	1.5461	5.31502e-21	8183.53	6441.61	7894.63	22713.8	20173.1	22878	up	Similar to RpS19a: 40S ribosomal protein S19a (Drosophila melanogaster OX%3D7227)
ANN02605	1.53482	0.000113155	51.1324	37.0819	83.3604	191.997	142.19	157.179	up	Similar to CPIJ001500: Ribosome biogenesis protein WDR12 homolog (Culex quinquefasciatus OX%3D7176)		ANN02504	6.14384	1.89235e-07	2.23502	10.1543	0	447.868	126.128	309.646	up	Similar to MIMI_L93: Putative ankyrin repeat protein L93 (Acanthamoeba polyphaga mimivirus OX%3D212035)
ANN02615	1.63991	5.74729e-07	94.5467	69.0136	54.0299	240.548	213.949	230.097	up	Similar to Mtrex: Exosome RNA helicase MTR4 (Mus musculus OX%3D10090)		ANN02506	1.57641	6.67467e-05	78.2258	59.6563	65.7521	312.392	138.875	157.268	up	Similar to dcaf8: DDB1- and CUL4-associated factor 8 (Xenopus tropicalis OX%3D8364)
ANN02619	1.28103	4.91135e-07	446.685	629.363	588.154	1471.98	1144.16	1426.76	up	Similar to Psmb2: Proteasome subunit beta type-2 (Rattus norvegicus OX%3D10116)		ANN02516	2.44394	1.5217e-06	6.70507	38.0785	26.3008	128.304	123.445	131.192	up	Similar to GVQW3: Protein GVQW3 (Homo sapiens OX%3D9606)
ANN02625	2.81495	1.05116e-21	54.0267	75.1939	55.5736	429.235	378.065	497.463	up	Similar to pola1: DNA polymerase alpha catalytic subunit (Xenopus laevis OX%3D8355)		ANN02539	7.93262	1.04917e-58	4.47004	10.1543	0	1389.83	923.822	1385.26	up	Protein of unknown function
ANN02628	1.64491	0.00356864	17.3657	20.6011	10.806	36.4133	53.155	64.816	up	Similar to ZNF250: Zinc finger protein 250 (Homo sapiens OX%3D9606)		ANN02540	1.09904	4.63243e-09	1228.14	1483.79	1377.87	3276.13	2437.36	3046.76	up	Similar to smo-1: Small ubiquitin-related modifier (Caenorhabditis elegans OX%3D6239)
ANN02631	1.3008	6.33783e-06	111.912	106.095	86.4478	248.272	264.446	240.629	up	Similar to MTREX: Exosome RNA helicase MTR4 (Homo sapiens OX%3D9606)		ANN02563	2.75698	0.000170723	8.94009	17.77	0	59.7689	76.482	47.2618	up	Protein of unknown function
ANN02633	1.64188	0.000713501	29.9076	22.6612	18.5245	59.5854	99.0011	64.816	up	Similar to Mtrex: Exosome RNA helicase MTR4 (Mus musculus OX%3D10090)		ANN02565	1.03765	0.0129605	65.9331	52.0406	84.7471	84.4734	165.04	165.416	up	Similar to lig: Protein lingerer (Aedes aegypti OX%3D7159)
ANN02655	1.62541	1.20155e-12	226.719	246.183	234.644	762.472	675.068	746.194	up	Similar to pol: RNA-directed DNA polymerase from mobile element jockey (Drosophila melanogaster OX%3D7227)		ANN02570	2.06817	6.55359e-09	41.3479	27.9242	36.5289	154.602	165.04	124.673	up	Protein of unknown function
ANN02656	1.36224	7.55926e-06	82.9695	90.6447	67.9233	219.583	199.996	204.98	up	Protein of unknown function		ANN02576	3.65291	6.29463e-07	4.47004	5.07713	2.92231	74.9103	46.9626	36.6686	up	Protein of unknown function
ANN02670	1.54833	0.00018439	90.6876	94.7649	211.488	496.545	263.117	393.757	up	Similar to aarsd1: Alanyl-tRNA editing protein Aarsd1 (Danio rerio OX%3D7955)		ANN02590	1.54905	4.37138e-25	7053.73	6383.22	7013.55	20753.4	18081.3	21009.5	up	Similar to RpL44: 60S ribosomal protein L44 (Ochlerotatus triseriatus OX%3D7162)
ANN02675	3.21497	1.11346e-18	23.1543	28.8415	18.5245	182.066	227.238	252.782	up	Similar to Tret1: Facilitated trehalose transporter Tret1 (Drosophila ananassae OX%3D7217)		ANN02591	1.09299	6.11205e-10	783.375	752.684	789.025	1869.57	1465.9	1624.83	up	Similar to lap-2: Putative aminopeptidase W07G4.4 (Caenorhabditis elegans OX%3D6239)
ANN02679	2.28054	0.0143712	6.75333	4.12021	1.54371	30.8961	13.9532	18.6346	up	Protein of unknown function		ANN02601	3.05854	0.0191439	2.23502	2.53856	0	11.9538	15.4306	13.8526	up	Similar to Bambi: BMP and activin membrane-bound inhibitor homolog (Mus musculus OX%3D10090)
ANN02691	1.19306	0.000340396	69.4629	93.7349	114.235	218.48	182.72	229.286	up	Similar to ZNF585A: Zinc finger protein 585A (Pongo abelii OX%3D9601)		ANN02615	1.7674	3.27919e-10	72.6382	72.3491	55.524	245.451	221.395	218.382	up	Similar to Mtrex: Exosome RNA helicase MTR4 (Mus musculus OX%3D10090)
ANN02695	1.50465	4.10295e-06	78.1457	58.713	60.2047	173.239	174.747	213.082	up	Similar to Zfp26: Zinc finger protein 26 (Mus musculus OX%3D10090)		ANN02617	1.52849	0.0074997	44.7004	8.88498	46.757	94.8333	77.1529	117.34	up	Similar to MTREX: Exosome RNA helicase MTR4 (Homo sapiens OX%3D9606)
ANN02696	1.77256	1.83193e-08	102.265	93.7349	112.691	456.821	267.768	329.751	up	Similar to Zfp26: Zinc finger protein 26 (Mus musculus OX%3D10090)		ANN02619	1.09817	3.16004e-05	457.062	495.02	375.517	1159.52	648.755	1036.5	up	Similar to Psmb2: Proteasome subunit beta type-2 (Rattus norvegicus OX%3D10116)
ANN02712	1.63664	7.86125e-06	128.313	72.1037	95.71	372.96	205.311	345.145	up	Similar to Tret1: Facilitated trehalose transporter Tret1 (Anopheles gambiae OX%3D7165)		ANN02625	2.51669	2.13137e-25	69.2857	88.8498	68.6744	454.244	425.347	418.837	up	Similar to pola1: DNA polymerase alpha catalytic subunit (Xenopus laevis OX%3D8355)
ANN02793	1.59071	8.96913e-05	27.9781	49.4426	33.9616	129.102	102.323	105.326	up	Similar to COASY: Bifunctional coenzyme A synthase (Homo sapiens OX%3D9606)		ANN02628	2.65183	8.31957e-05	7.82258	5.07713	11.6893	72.5196	50.3171	30.1498	up	Similar to ZNF250: Zinc finger protein 250 (Homo sapiens OX%3D9606)
ANN02817	1.78031	0.0311483	15.4362	2.06011	9.26226	19.8618	37.8729	34.0284	up	Protein of unknown function		ANN02631	1.04713	2.58342e-05	124.044	151.045	124.198	278.125	259.636	287.645	up	Similar to MTREX: Exosome RNA helicase MTR4 (Homo sapiens OX%3D9606)
ANN02841	1.71171	0.0110462	10.6124	9.27048	12.3497	51.8613	28.5708	25.1162	up	Similar to ACP2: Lysosomal acid phosphatase (Pongo abelii OX%3D9601)		ANN02633	1.77116	0.000220303	17.8802	19.0392	37.9901	102.006	71.7857	79.0413	up	Similar to Mtrex: Exosome RNA helicase MTR4 (Mus musculus OX%3D10090)
ANN02953	1.88457	0.0452637	1.92952	24.7213	9.26226	11.0343	63.786	57.5242	up	Similar to DNAH10: Dynein heavy chain 10%2C axonemal (Homo sapiens OX%3D9606)		ANN02655	1.47426	1.47846e-13	248.087	291.935	333.144	777.792	794.339	849.083	up	Similar to pol: RNA-directed DNA polymerase from mobile element jockey (Drosophila melanogaster OX%3D7227)
ANN02955	2.87353	0.000151898	1.92952	10.3005	3.08742	36.4133	35.8796	42.1304	up	Similar to Acyl-CoA Delta(11) desaturase (Choristoneura rosaceana OX%3D27543)		ANN02656	1.06317	0.00670931	54.758	149.775	89.1306	200.823	192.547	219.197	up	Protein of unknown function
ANN02964	5.33345	1.46999e-11	0	4.12021	3.08742	130.205	59.1349	89.1219	up	Similar to Histone H3 (Urechis caupo OX%3D6431)		ANN02670	2.26541	4.82333e-19	108.399	85.0419	68.6744	442.29	394.486	431.06	up	Similar to aarsd1: Alanyl-tRNA editing protein Aarsd1 (Danio rerio OX%3D7955)
ANN02983	1.17177	5.03156e-06	312.583	402.751	344.247	664.267	830.546	891.219	up	Similar to Cul4b: Cullin-4B (Mus musculus OX%3D10090)		ANN02675	3.78615	4.99657e-17	8.94009	10.1543	37.9901	224.731	252.256	288.46	up	Similar to Tret1: Facilitated trehalose transporter Tret1 (Drosophila ananassae OX%3D7217)
ANN02996	5.6184	0.00953091	0	6.18032	0	239.445	55.1483	16.204	up	Similar to Esterase FE4 (Myzus persicae OX%3D13164)		ANN02691	1.11236	0.000539478	107.281	91.3883	103.742	177.713	290.497	184.973	up	Similar to ZNF585A: Zinc finger protein 585A (Pongo abelii OX%3D9601)
ANN02998	4.62948	1.64792e-07	5.78857	2.06011	6.17484	270.341	53.155	19.4448	up	Similar to Venom carboxylesterase-6 (Apis mellifera OX%3D7460)		ANN02695	1.20011	0.0107674	65.9331	49.502	43.8347	188.073	71.1148	108.376	up	Similar to Zfp26: Zinc finger protein 26 (Mus musculus OX%3D10090)
ANN03050	1.02294	0.000203163	602.011	950.739	787.292	1871.42	1440.5	1443.78	up	Similar to Y-box factor homolog (Aplysia californica OX%3D6500)		ANN02712	2.49814	9.76674e-11	24.5852	40.617	58.4463	306.017	177.116	208.604	up	Similar to Tret1: Facilitated trehalose transporter Tret1 (Anopheles gambiae OX%3D7165)
ANN03051	1.48388	5.12809e-05	70.4276	61.8032	41.6802	184.273	176.74	130.442	up	Similar to TRMT11: tRNA (guanine(10)-N2)-methyltransferase homolog (Homo sapiens OX%3D9606)		ANN02723	1.0537	0.00102084	70.4032	97.7347	75.9802	192.854	171.749	141.785	up	Similar to IRAK4: Interleukin-1 receptor-associated kinase 4 (Bos taurus OX%3D9913)
ANN03052	2.60782	0.00198102	6.75333	4.12021	3.08742	13.2412	34.5507	38.8896	up	Protein of unknown function		ANN02793	1.50281	0.0188281	13.4101	29.1935	32.1455	123.522	46.2917	40.7429	up	Similar to COASY: Bifunctional coenzyme A synthase (Homo sapiens OX%3D9606)
ANN03053	1.68285	0.00028081	54.9914	25.7513	23.1557	88.2746	123.585	125.581	up	Similar to trmt11: tRNA (guanine(10)-N2)-methyltransferase homolog (Xenopus laevis OX%3D8355)		ANN02822	2.47027	0.000442142	6.70507	5.07713	8.76694	33.4706	30.8611	48.8915	up	Similar to Adat1: tRNA-specific adenosine deaminase 1 (Mus musculus OX%3D10090)
ANN03054	1.75086	0.0252579	25.0838	9.27048	1.54371	43.0339	46.5106	35.6488	up	Protein of unknown function		ANN02841	2.24367	0.000230418	11.1751	6.34641	16.0727	39.8459	50.3171	67.6333	up	Similar to ACP2: Lysosomal acid phosphatase (Pongo abelii OX%3D9601)
ANN03056	1.94505	2.0112e-06	36.661	28.8415	21.6119	99.309	104.981	135.303	up	Similar to DHX29: ATP-dependent RNA helicase DHX29 (Homo sapiens OX%3D9606)		ANN02864	1.32493	0.011586	25.7028	21.5778	18.995	51.0028	44.279	71.7076	up	Similar to Adat1: tRNA-specific adenosine deaminase 1 (Mus musculus OX%3D10090)
ANN03059	2.19221	8.04819e-09	38.5905	96.825	75.6418	365.236	346.172	250.352	up	Similar to Scd1: Acyl-CoA desaturase 1 (Mus musculus OX%3D10090)		ANN02953	2.2245	0.0194542	6.70507	8.88498	0	28.6891	25.494	20.3715	up	Similar to DNAH10: Dynein heavy chain 10%2C axonemal (Homo sapiens OX%3D9606)
ANN03089	1.68402	3.07398e-11	222.86	200.86	159.002	658.749	584.705	636.817	up	Similar to C16C10.4: Probable histone deacetylase complex subunit SAP18 (Caenorhabditis elegans OX%3D6239)		ANN02955	3.06649	0.0175391	0	7.61569	0	20.7199	10.7343	32.5944	up	Similar to Acyl-CoA Delta(11) desaturase (Choristoneura rosaceana OX%3D27543)
ANN03102	1.97701	0.0234211	8.68286	5.15027	3.08742	14.3446	19.9331	34.0284	up	Similar to pol: Retrovirus-related Pol polyprotein from transposon opus (Drosophila melanogaster OX%3D7227)		ANN02964	4.9281	9.21203e-06	0	3.80785	0	43.8305	31.532	40.7429	up	Similar to Histone H3 (Urechis caupo OX%3D6431)
ANN03110	1.20509	1.03807e-05	134.102	183.35	159.002	393.926	344.178	360.539	up	Similar to tardbp: TAR DNA-binding protein 43 (Xenopus tropicalis OX%3D8364)		ANN02983	1.03247	1.00249e-06	372.131	343.976	349.217	791.34	595.754	793.672	up	Similar to Cul4b: Cullin-4B (Mus musculus OX%3D10090)
ANN03121	2.67922	1.04863e-09	45.3438	12.3606	30.8742	201.928	184.049	182.295	up	Protein of unknown function		ANN02996	3.43829	2.15884e-06	5.58755	6.34641	2.92231	35.8613	83.8618	43.1875	up	Similar to Esterase FE4 (Myzus persicae OX%3D13164)
ANN03153	6.80271	5.17518e-09	0	2.06011	0	76.1369	77.7392	97.2239	up	Similar to gd: Serine protease gd (Drosophila melanogaster OX%3D7227)		ANN02998	2.72198	1.54786e-05	4.47004	30.4628	7.30579	73.3165	112.71	92.079	up	Similar to Venom carboxylesterase-6 (Apis mellifera OX%3D7460)
ANN03159	4.87574	0.018842	0	0	0	4.41373	9.30212	4.8612	up	Protein of unknown function		ANN03009	1.58649	0.0275592	15.6452	7.61569	16.0727	62.9566	23.4813	31.7795	up	Similar to GVQW3: Protein GVQW3 (Homo sapiens OX%3D9606)
ANN03160	4.8244	0.00489485	0	1.03005	0	15.4481	13.2887	6.4816	up	Protein of unknown function		ANN03010	1.3823	3.24179e-05	44.7004	66.0027	55.524	141.055	154.977	136.081	up	Similar to Gldc: Glycine dehydrogenase (decarboxylating)%2C mitochondrial (Mus musculus OX%3D10090)
ANN03167	3.10715	4.72221e-08	3.85905	16.4809	9.26226	63.9991	90.3635	99.6545	up	Similar to AAEL008004: Elongation of very long chain fatty acids protein AAEL008004 (Aedes aegypti OX%3D7159)		ANN03013	2.44547	0.0352059	2.23502	2.53856	2.92231	18.3291	12.747	10.5932	up	Similar to Trrap: Transformation/transcription domain-associated protein (Mus musculus OX%3D10090)
ANN03174	4.19827	0.0147034	0	2.06011	0	2.20687	10.631	27.5468	up	Protein of unknown function		ANN03042	7.57242	4.05049e-08	0	0	0	41.4398	39.5828	52.9658	up	Similar to Nudt9: ADP-ribose pyrophosphatase%2C mitochondrial (Mus musculus OX%3D10090)
ANN03181	5.50694	9.77559e-08	0	2.06011	1.54371	63.9991	49.8328	42.1304	up	Protein of unknown function		ANN03048	1.17874	0.00137126	43.5829	45.6942	49.6793	104.396	118.077	91.2642	up	Similar to Irs2: Insulin receptor substrate 2 (Mus musculus OX%3D10090)
ANN03186	1.13108	0.0177356	27.0133	23.6912	33.9616	71.7231	55.1483	57.5242	up	Protein of unknown function		ANN03051	1.9709	8.48385e-06	40.2304	20.3085	35.0678	176.119	99.2924	100.228	up	Similar to TRMT11: tRNA (guanine(10)-N2)-methyltransferase homolog (Homo sapiens OX%3D9606)
ANN03195	3.27581	0.000146447	1.92952	2.06011	6.17484	24.2755	41.8595	25.1162	up	Protein of unknown function		ANN03052	3.49829	7.62625e-06	4.47004	3.80785	2.92231	27.8921	54.3425	45.6321	up	Protein of unknown function
ANN03196	5.9675	9.04882e-05	0	0	1.54371	11.0343	23.2553	42.9406	up	Protein of unknown function		ANN03053	2.52178	4.29053e-08	21.2327	11.4235	16.0727	101.209	101.976	78.2264	up	Similar to trmt11: tRNA (guanine(10)-N2)-methyltransferase homolog (Xenopus laevis OX%3D8355)
ANN03197	4.72117	8.78709e-07	0	2.06011	3.08742	43.0339	43.8529	35.6488	up	Similar to Kif11: Kinesin-like protein KIF11 (Mus musculus OX%3D10090)		ANN03054	1.94872	0.0440883	5.58755	7.61569	2.92231	9.56302	25.494	27.7052	up	Protein of unknown function
ANN03206	1.25036	0.0375159	17.3657	12.3606	23.1557	33.103	53.155	37.2692	up	Similar to RRBP1: Ribosome-binding protein 1 (Homo sapiens OX%3D9606)		ANN03056	1.63796	0.00114342	45.8179	12.6928	35.0678	83.6764	91.2416	117.34	up	Similar to DHX29: ATP-dependent RNA helicase DHX29 (Homo sapiens OX%3D9606)
ANN03220	1.21901	2.42109e-06	461.156	690.136	707.019	1473.08	1368.08	1480.23	up	Similar to Tubulin beta-1 chain (Manduca sexta OX%3D7130)		ANN03059	2.56866	7.81665e-16	45.8179	29.1935	55.524	258.202	227.433	286.015	up	Similar to Scd1: Acyl-CoA desaturase 1 (Mus musculus OX%3D10090)
ANN03239	3.30689	0.0246703	1.92952	2.06011	0	33.103	6.64437	3.2408	up	Similar to gghB: Gamma-glutamyl hydrolase B (Dictyostelium discoideum OX%3D44689)		ANN03089	1.47403	1.85884e-10	212.327	181.507	159.266	586.532	452.854	501.138	up	Similar to C16C10.4: Probable histone deacetylase complex subunit SAP18 (Caenorhabditis elegans OX%3D6239)
ANN03248	1.61814	0.00860547	23.1543	24.7213	4.63113	61.7922	48.5039	55.9038	up	Similar to ELOVL7: Elongation of very long chain fatty acids protein 7 (Bos taurus OX%3D9913)		ANN03102	2.10325	0.0355085	3.35253	6.34641	2.92231	24.7045	17.4433	12.2229	up	Similar to pol: Retrovirus-related Pol polyprotein from transposon opus (Drosophila melanogaster OX%3D7227)
ANN03271	1.89625	6.73611e-05	62.7095	302.836	271.693	959.987	685.035	722.698	up	Similar to GAA: Lysosomal alpha-glucosidase (Homo sapiens OX%3D9606)		ANN03110	1.22691	3.65922e-05	175.449	143.429	127.121	431.133	248.231	367.501	up	Similar to tardbp: TAR DNA-binding protein 43 (Xenopus tropicalis OX%3D8364)
ANN03273	7.06899	2.28279e-09	12.5419	6.18032	9.26226	3067.54	473.079	221.184	up	Similar to GAA: Lysosomal alpha-glucosidase (Bos taurus OX%3D9913)		ANN03121	2.64572	3.65469e-13	30.1728	55.8484	32.1455	176.916	261.649	300.683	up	Protein of unknown function
ANN03274	6.73246	2.82965e-11	36.661	26.7814	21.6119	6949.42	1470.4	646.539	up	Similar to GAA: Lysosomal alpha-glucosidase (Pongo abelii OX%3D9601)		ANN03146	2.11542	0.000732876	17.8802	12.6928	11.6893	102.802	36.8992	44.8172	up	Protein of unknown function
ANN03284	2.07653	0.0454152	16.401	0	13.8934	88.2746	16.6109	22.6856	up	Similar to FucT6: Alpha-(1%2C6)-fucosyltransferase (Drosophila melanogaster OX%3D7227)		ANN03153	3.45448	1.60601e-07	12.2926	2.53856	5.84463	102.006	85.8745	43.1875	up	Similar to gd: Serine protease gd (Drosophila melanogaster OX%3D7227)
ANN03290	1.22142	0.0171971	24.119	17.5109	24.6994	56.2751	52.4905	45.3712	up	Similar to IPMK: Inositol polyphosphate multikinase (Homo sapiens OX%3D9606)		ANN03159	4.60093	0.0114568	0	0	1.46116	19.126	6.03805	8.14859	up	Protein of unknown function
ANN03301	4.75029	0.000740867	1.92952	0	0	17.6549	17.2754	24.306	up	Similar to CPD: Carboxypeptidase D (Fragment) (Lophonetta specularioides OX%3D75873)		ANN03167	3.6953	1.31592e-06	4.47004	0	8.76694	70.1288	41.5955	55.4104	up	Similar to AAEL008004: Elongation of very long chain fatty acids protein AAEL008004 (Aedes aegypti OX%3D7159)
ANN03314	1.02696	3.81357e-06	1514.68	1558.47	1583.85	3664.5	2809.24	3017.18	up	Similar to METAP2: Methionine aminopeptidase 2 (Homo sapiens OX%3D9606)		ANN03174	3.65511	0.0353932	0	2.53856	0	6.37535	9.39252	16.2972	up	Protein of unknown function
ANN03323	5.0284	7.20847e-31	11.5771	54.5928	24.6994	1282.19	765.432	929.299	up	Similar to Tubulin beta-1 chain (Manduca sexta OX%3D7130)		ANN03181	6.9952	1.59137e-05	0	0	0	68.535	10.7343	10.5932	up	Protein of unknown function
ANN03329	2.31204	1.35375e-16	7063.99	9533.14	10484.9	58306.5	33516.9	42654.6	up	Similar to RpL19: 60S ribosomal protein L19 (Drosophila melanogaster OX%3D7227)		ANN03195	7.3793	1.54203e-07	0	0	0	29.486	39.5828	48.0767	up	Protein of unknown function
ANN03330	1.79558	1.04709e-13	306.794	373.909	307.198	1042.74	1057.78	1331.16	up	Similar to rcc2: Protein RCC2 homolog (Danio rerio OX%3D7955)		ANN03196	5.52201	0.00340894	0	0	0	5.57843	20.1268	6.51887	up	Protein of unknown function
ANN03333	2.34176	0.00932309	0.964762	15.4508	3.08742	44.1373	25.2486	31.5978	up	Similar to Mgme1: Mitochondrial genome maintenance exonuclease 1 (Mus musculus OX%3D10090)		ANN03197	2.33115	0.00113202	14.5276	2.53856	8.76694	31.8767	48.9753	50.5212	up	Similar to Kif11: Kinesin-like protein KIF11 (Mus musculus OX%3D10090)
ANN03352	8.65173	4.53844e-79	2.89429	6.18032	12.3497	3497.88	2193.97	2241.82	up	Protein of unknown function		ANN03206	3.11954	0.00111982	2.23502	0	8.76694	31.8767	24.8231	35.0389	up	Similar to RRBP1: Ribosome-binding protein 1 (Homo sapiens OX%3D9606)
ANN03357	1.07404	1.61247e-05	305.83	330.647	277.868	679.715	553.476	695.151	up	Similar to Eaf: Ell-associated factor Eaf (Drosophila willistoni OX%3D7260)		ANN03215	1.18328	0.0121312	41.3479	40.617	23.3785	57.3781	87.8872	95.3385	up	Similar to pol: RNA-directed DNA polymerase from mobile element jockey (Drosophila melanogaster OX%3D7227)
ANN03361	1.8147	1.16014e-13	143.75	160.688	135.847	538.475	512.946	500.703	up	Similar to Klhdc4: Kelch domain-containing protein 4 (Mus musculus OX%3D10090)		ANN03239	4.01634	0.012272	2.23502	0	0	15.1415	11.4052	13.0377	up	Similar to gghB: Gamma-glutamyl hydrolase B (Dictyostelium discoideum OX%3D44689)
ANN03374	2.08582	2.96932e-07	39.5552	28.8415	21.6119	137.929	147.505	102.085	up	Protein of unknown function		ANN03248	2.09799	0.00389666	2.23502	15.2314	11.6893	37.4552	42.2664	43.1875	up	Similar to ELOVL7: Elongation of very long chain fatty acids protein 7 (Bos taurus OX%3D9913)
ANN03375	2.11788	2.07655e-11	89.7229	81.3742	89.5352	302.341	502.315	324.08	up	Protein of unknown function		ANN03270	1.28794	0.00302862	27.9378	38.0785	29.2231	82.8795	65.0768	84.7453	up	Similar to Tret1: Facilitated trehalose transporter Tret1 (Bombyx mori OX%3D7091)
ANN03376	2.98095	8.82731e-09	22.1895	8.24043	10.806	76.1369	146.841	106.946	up	Similar to tdrd6: Tudor domain-containing 6 (Danio rerio OX%3D7955)		ANN03271	2.81424	1.20043e-34	98.341	135.813	96.4364	816.044	683.641	827.082	up	Similar to GAA: Lysosomal alpha-glucosidase (Homo sapiens OX%3D9606)
ANN03378	3.03294	4.05928e-13	20.26	19.571	16.9808	108.136	166.774	192.017	up	Similar to Trim56: E3 ubiquitin-protein ligase TRIM56 (Mus musculus OX%3D10090)		ANN03273	4.19954	7.6808e-06	4.47004	30.4628	51.1405	568.203	697.059	307.202	up	Similar to GAA: Lysosomal alpha-glucosidase (Bos taurus OX%3D9913)
ANN03382	1.32417	5.2305e-06	189.093	170.989	276.324	559.44	461.119	566.329	up	Similar to SUPT7L: STAGA complex 65 subunit gamma (Homo sapiens OX%3D9606)		ANN03274	4.17688	4.92795e-05	13.4101	64.7334	185.567	1877.54	1887.9	994.943	up	Similar to GAA: Lysosomal alpha-glucosidase (Pongo abelii OX%3D9601)
ANN03391	1.68467	6.79079e-10	100.335	103.005	98.7975	366.34	300.326	306.255	up	Similar to eef1akmt1: EEF1A lysine methyltransferase 1 (Xenopus laevis OX%3D8355)		ANN03305	5.3612	0.00569923	0	0	0	13.5476	12.0761	3.25944	up	Protein of unknown function
ANN03393	2.32034	8.24165e-18	138.926	106.095	126.584	734.886	586.698	535.542	up	Similar to C27H6.8: MYG1 protein C27H6.8 (Caenorhabditis elegans OX%3D6239)		ANN03323	5.12804	7.93959e-78	29.0553	39.3478	42.3736	976.225	1408.88	1457.78	up	Similar to Tubulin beta-1 chain (Manduca sexta OX%3D7130)
ANN03395	1.66915	5.29068e-11	416.777	602.581	546.473	1852.66	1395.98	1729.78	up	Similar to Mrto4: mRNA turnover protein 4 homolog (Mus musculus OX%3D10090)		ANN03329	1.59369	4.29918e-26	12690.5	11268.7	11227.5	38288.7	32629	35287.5	up	Similar to RpL19: 60S ribosomal protein L19 (Drosophila melanogaster OX%3D7227)
ANN03397	1.37961	2.27253e-07	222.86	282.235	319.548	829.782	637.195	674.896	up	Similar to ZNHIT6: Box C/D snoRNA protein 1 (Pongo abelii OX%3D9601)		ANN03330	1.76359	5.97599e-21	372.131	355.399	450.036	1453.58	1220.36	1320.07	up	Similar to rcc2: Protein RCC2 homolog (Danio rerio OX%3D7955)
ANN03398	1.25311	3.95328e-06	804.611	1212.37	1133.08	2950.58	2034.51	2522.15	up	Similar to Rpn11: 26S proteasome non-ATPase regulatory subunit 14 (Drosophila melanogaster OX%3D7227)		ANN03333	3.77406	5.68474e-05	0	2.53856	5.84463	39.049	43.6081	25.2606	up	Similar to Mgme1: Mitochondrial genome maintenance exonuclease 1 (Mus musculus OX%3D10090)
ANN03404	2.99969	0.000104166	11.5771	1.03005	3.08742	48.551	44.5173	37.2692	up	Similar to Carboxypeptidase B (Astacus astacus OX%3D6715)		ANN03350	1.33953	0.000601829	110.634	96.4655	64.2909	150.618	338.131	199.64	up	Similar to INTS7: Integrator complex subunit 7 (Gallus gallus OX%3D9031)
ANN03408	1.28209	1.0725e-05	127.349	159.658	209.945	404.96	376.736	420.494	up	Protein of unknown function		ANN03351	1.56603	3.39703e-10	137.454	112.966	165.111	361.004	458.221	408.244	up	Similar to fam120a: Constitutive coactivator of PPAR-gamma-like protein 1 homolog (Xenopus tropicalis OX%3D8364)
ANN03409	1.0983	1.09647e-05	537.372	524.297	611.309	1442.19	1029.88	1109.16	up	Similar to ZNF850: Zinc finger protein 850 (Homo sapiens OX%3D9606)		ANN03352	7.68252	1.89919e-108	15.6452	15.2314	2.92231	2563.69	2012.68	2640.96	up	Protein of unknown function
ANN03410	1.54058	0.000126767	86.8286	37.0819	54.0299	184.273	145.512	190.397	up	Similar to Zfp26: Zinc finger protein 26 (Mus musculus OX%3D10090)		ANN03354	1.14412	3.60444e-05	245.852	157.391	172.417	374.552	519.272	380.539	up	Similar to ascc3: Activating signal cointegrator 1 complex subunit 3 (Gallus gallus OX%3D9031)
ANN03412	1.87758	4.89663e-14	375.292	317.256	384.384	1529.36	1061.77	1365.19	up	Similar to ZNF91: Zinc finger protein 91 (Homo sapiens OX%3D9606)		ANN03357	1.00191	7.43984e-08	352.016	330.013	314.149	682.162	652.109	662.48	up	Similar to Eaf: Ell-associated factor Eaf (Drosophila willistoni OX%3D7260)
ANN03413	1.05168	0.0391706	26.0486	31.9317	32.4179	50.7579	85.7124	49.4222	up	Similar to Zfp26: Zinc finger protein 26 (Mus musculus OX%3D10090)		ANN03359	1.27299	3.07644e-10	334.136	321.128	280.542	687.741	856.061	719.52	up	Similar to beta-PheRS: Phenylalanine--tRNA ligase beta subunit (Drosophila melanogaster OX%3D7227)
ANN03414	2.37937	8.23193e-27	339.596	334.767	301.023	1875.84	1503.62	1703.04	up	Similar to ZNF208: Zinc finger protein 208 (Homo sapiens OX%3D9606)		ANN03361	1.84277	1.73111e-13	155.334	177.7	102.281	518.794	536.045	511.731	up	Similar to Klhdc4: Kelch domain-containing protein 4 (Mus musculus OX%3D10090)
ANN03415	1.05308	2.33738e-05	396.517	288.415	355.053	700.68	753.472	703.253	up	Similar to REPS2: RalBP1-associated Eps domain-containing protein 2 (Homo sapiens OX%3D9606)		ANN03374	3.16256	2.34447e-14	15.6452	13.9621	14.6116	142.648	114.052	140.156	up	Protein of unknown function
ANN03416	1.52146	9.75635e-11	611.659	496.486	432.239	1516.12	1443.82	1469.7	up	Similar to Caf1: Probable histone-binding protein Caf1 (Drosophila melanogaster OX%3D7227)		ANN03375	2.6091	1.59959e-26	83.8133	73.6184	58.4463	454.244	436.081	434.32	up	Protein of unknown function
ANN03419	1.34938	3.11162e-08	294.252	242.063	230.013	652.129	688.357	615.752	up	Similar to GMPS: GMP synthase [glutamine-hydrolyzing] (Pongo abelii OX%3D9601)		ANN03376	2.79081	4.68191e-10	29.0553	12.6928	14.6116	140.258	100.634	154.823	up	Similar to tdrd6: Tudor domain-containing 6 (Danio rerio OX%3D7955)
ANN03420	2.34931	2.10186e-20	146.644	117.426	148.196	717.231	613.276	767.259	up	Similar to Rev1: DNA repair protein Rev1 (Drosophila melanogaster OX%3D7227)		ANN03378	3.09634	6.01591e-12	12.2926	35.5399	13.1504	134.679	175.103	211.863	up	Similar to Trim56: E3 ubiquitin-protein ligase TRIM56 (Mus musculus OX%3D10090)
ANN03428	1.91296	3.78163e-11	83.9343	101.975	75.6418	358.616	284.379	346.765	up	Similar to Sas10: Something about silencing protein 10 (Drosophila melanogaster OX%3D7227)		ANN03391	1.38012	4.80486e-05	124.044	126.928	56.9851	270.155	238.168	297.423	up	Similar to eef1akmt1: EEF1A lysine methyltransferase 1 (Xenopus laevis OX%3D8355)
ANN03431	1.52665	1.63024e-05	72.3571	64.8934	75.6418	269.238	148.834	196.068	up	Similar to Isy1: Pre-mRNA-splicing factor ISY1 homolog (Rattus norvegicus OX%3D10116)		ANN03393	2.32622	4.66324e-21	108.399	104.081	94.9752	455.837	458.221	630.701	up	Similar to C27H6.8: MYG1 protein C27H6.8 (Caenorhabditis elegans OX%3D6239)
ANN03435	2.48849	0.0293245	1.92952	6.18032	0	12.1378	13.2887	22.6856	up	Similar to pol: Retrovirus-related Pol polyprotein from transposon 17.6 (Drosophila melanogaster OX%3D7227)		ANN03395	1.19538	1.79571e-11	621.336	739.992	585.924	1455.17	1441.08	1564.53	up	Similar to Mrto4: mRNA turnover protein 4 homolog (Mus musculus OX%3D10090)
ANN03436	1.31025	0.0319202	27.0133	8.24043	23.1557	52.9648	49.1684	42.1304	up	Similar to rfx2: DNA-binding protein RFX2 (Xenopus laevis OX%3D8355)		ANN03397	1.27815	2.10929e-08	250.322	229.74	227.941	648.692	457.55	612.774	up	Similar to ZNHIT6: Box C/D snoRNA protein 1 (Pongo abelii OX%3D9601)
ANN03438	1.70121	4.63523e-11	232.508	221.461	172.896	701.783	588.027	755.916	up	Similar to ZCCHC9: Zinc finger CCHC domain-containing protein 9 (Homo sapiens OX%3D9606)		ANN03404	2.83327	3.20886e-06	4.47004	15.2314	8.76694	90.8487	55.0133	55.4104	up	Similar to Carboxypeptidase B (Astacus astacus OX%3D6715)
ANN03439	2.08884	1.02487e-23	389.764	360.519	356.597	1601.08	1586.68	1523.99	up	Similar to pit: Probable ATP-dependent RNA helicase pitchoune (Drosophila melanogaster OX%3D7227)		ANN03408	1.27661	1.01523e-05	117.339	149.775	175.339	455.04	324.042	290.09	up	Protein of unknown function
ANN03442	1.09289	0.0263944	33.7667	28.8415	30.8742	77.2403	44.5173	78.5894	up	Protein of unknown function		ANN03410	1.42579	8.71286e-06	48.053	54.5791	64.2909	140.258	156.318	149.934	up	Similar to Zfp26: Zinc finger protein 26 (Mus musculus OX%3D10090)
ANN03455	1.17822	1.65633e-06	304.865	304.896	348.879	791.161	615.933	760.777	up	Similar to SLC25A11: Mitochondrial 2-oxoglutarate/malate carrier protein (Homo sapiens OX%3D9606)		ANN03412	1.60664	2.02603e-16	337.488	365.553	282.003	1103.73	955.354	944.421	up	Similar to ZNF91: Zinc finger protein 91 (Homo sapiens OX%3D9606)
ANN03456	2.99286	7.62479e-22	84.899	53.5628	108.06	721.645	548.161	676.517	up	Protein of unknown function		ANN03413	1.15151	0.0440883	26.8203	40.617	11.6893	62.9566	53.0007	61.1144	up	Similar to Zfp26: Zinc finger protein 26 (Mus musculus OX%3D10090)
ANN03458	2.73222	4.57226e-29	187.164	197.77	248.537	1452.12	1201.3	1541.81	up	Similar to nmd3: 60S ribosomal export protein NMD3 (Xenopus tropicalis OX%3D8364)		ANN03414	2.31569	1.32592e-21	279.378	274.165	226.479	1651.22	951.328	1285.85	up	Similar to ZNF208: Zinc finger protein 208 (Homo sapiens OX%3D9606)
ANN03459	1.30955	8.48726e-07	251.803	193.65	213.032	560.544	461.119	612.511	up	Similar to STRADA: STE20-related kinase adapter protein alpha (Gallus gallus OX%3D9031)		ANN03416	1.21863	6.55387e-13	594.516	567.369	682.36	1436.84	1407.54	1444.74	up	Similar to Caf1: Probable histone-binding protein Caf1 (Drosophila melanogaster OX%3D7227)
ANN03481	4.92912	1.30653e-35	9.64762	23.6912	33.9616	739.3	486.368	758.347	up	Protein of unknown function		ANN03419	1.52376	1.72406e-14	223.502	217.047	235.246	679.771	580.995	682.037	up	Similar to GMPS: GMP synthase [glutamine-hydrolyzing] (Pongo abelii OX%3D9601)
ANN03497	1.37968	2.13451e-06	192.952	133.907	171.352	516.407	368.098	413.202	up	Similar to jockey\pol: RNA-directed DNA polymerase from mobile element jockey (Drosophila funebris OX%3D7221)		ANN03420	2.06686	1.31362e-24	146.394	142.16	132.965	594.501	583.007	590.773	up	Similar to Rev1: DNA repair protein Rev1 (Drosophila melanogaster OX%3D7227)
ANN03507	1.51911	0.0231051	21.2248	5.15027	15.4371	40.827	39.2018	39.6998	up	Similar to Rhbdd1: Rhomboid-related protein 4 (Mus musculus OX%3D10090)		ANN03422	1.1831	0.0037107	34.6428	78.6955	48.2182	131.492	118.077	116.525	up	Similar to ZNF324B: Zinc finger protein 324B (Homo sapiens OX%3D9606)
ANN03510	2.1603	0.00173299	11.5771	7.21037	15.4371	89.3781	33.2219	29.1672	up	Similar to Rhbdd1: Rhomboid-related protein 4 (Mus musculus OX%3D10090)		ANN03427	2.105	0.00251818	6.70507	7.61569	11.6893	38.2521	46.9626	25.2606	up	Protein of unknown function
ANN03518	1.28375	7.40766e-05	150.503	127.727	98.7975	248.272	384.045	288.431	up	Similar to Polr1a: DNA-directed RNA polymerase I subunit RPA1 (Rattus norvegicus OX%3D10116)		ANN03428	1.78232	1.96511e-09	83.8133	67.272	124.198	341.081	271.041	330.833	up	Similar to Sas10: Something about silencing protein 10 (Drosophila melanogaster OX%3D7227)
ANN03521	1.69129	2.4081e-05	36.661	38.112	43.2239	86.0678	145.512	146.646	up	Similar to SETMAR: Histone-lysine N-methyltransferase SETMAR (Homo sapiens OX%3D9606)		ANN03431	1.24735	7.6566e-05	62.5806	78.6955	56.9851	152.211	169.736	149.119	up	Similar to Isy1: Pre-mRNA-splicing factor ISY1 homolog (Rattus norvegicus OX%3D10116)
ANN03526	1.42761	2.20837e-07	192.952	127.727	163.633	457.925	421.918	423.734	up	Similar to ovca2: Esterase OVCA2 (Danio rerio OX%3D7955)		ANN03437	1.4893	2.08175e-08	222.385	133.275	217.712	620.799	466.943	522.324	up	Similar to Tti1: TELO2-interacting protein 1 homolog (Mus musculus OX%3D10090)
ANN03527	1.78061	1.12444e-09	112.877	162.748	157.458	605.785	453.146	426.975	up	Similar to Cda: Cytidine deaminase (Mus musculus OX%3D10090)		ANN03438	1.69004	1.89171e-12	151.981	208.162	214.79	719.617	524.639	607.07	up	Similar to ZCCHC9: Zinc finger CCHC domain-containing protein 9 (Homo sapiens OX%3D9606)
ANN03528	2.6795	1.68695e-30	181.375	144.207	172.896	1099.02	993.334	1099.44	up	Similar to WDR36: WD repeat-containing protein 36 (Homo sapiens OX%3D9606)		ANN03439	1.85831	3.70906e-27	422.419	371.9	448.575	1444.02	1574.59	1485.49	up	Similar to pit: Probable ATP-dependent RNA helicase pitchoune (Drosophila melanogaster OX%3D7227)
ANN03529	1.35195	5.92406e-07	884.687	1255.64	1322.96	3426.16	2343.47	3067.42	up	Similar to B0272.3: Probable 3-hydroxyacyl-CoA dehydrogenase B0272.3 (Caenorhabditis elegans OX%3D6239)		ANN03455	1.50415	2.91454e-09	198.917	200.547	290.77	796.122	598.438	558.993	up	Similar to SLC25A11: Mitochondrial 2-oxoglutarate/malate carrier protein (Homo sapiens OX%3D9606)
ANN03532	1.85835	1.60118e-07	53.0619	50.4726	77.1855	279.169	182.72	188.776	up	Similar to Gins1: DNA replication complex GINS protein PSF1 (Mus musculus OX%3D10090)		ANN03456	3.00843	4.39125e-39	69.2857	90.119	68.6744	590.517	597.767	647.813	up	Protein of unknown function
ANN03533	1.96201	1.18213e-12	160.15	107.126	125.041	534.062	452.482	545.264	up	Protein of unknown function		ANN03458	2.39901	9.54541e-31	273.79	182.777	245.474	1254.35	1147.9	1303.77	up	Similar to nmd3: 60S ribosomal export protein NMD3 (Xenopus tropicalis OX%3D8364)
ANN03534	2.19467	4.63619e-13	3239.67	5098.76	5529.57	28282.1	16220.9	18975.7	up	Similar to RpL34: 60S ribosomal protein L34 (Aedes albopictus OX%3D7160)		ANN03459	1.72394	5.56867e-13	147.511	184.046	151.96	639.926	458.892	498.694	up	Similar to STRADA: STE20-related kinase adapter protein alpha (Gallus gallus OX%3D9031)
ANN03538	1.4533	3.83685e-06	260.486	334.767	219.207	997.503	571.416	667.604	up	Similar to Nt5dc1: 5'-nucleotidase domain-containing protein 1 (Mus musculus OX%3D10090)		ANN03468	1.93918	2.58835e-07	36.8779	30.4628	24.8397	111.569	130.824	113.265	up	Similar to CG10428: Glutathione S-transferase C-terminal domain-containing protein homolog (Drosophila melanogaster OX%3D7227)
ANN03541	1.88417	0.00260328	23.1543	20.6011	10.806	110.343	65.1148	29.9774	up	Similar to Slc22a5: Solute carrier family 22 member 5 (Mus musculus OX%3D10090)		ANN03477	2.47294	0.0317611	4.47004	0	10.2281	52.5966	19.4559	8.14859	up	Protein of unknown function
ANN03545	1.20219	0.0185315	44.379	71.0737	61.7484	225.1	112.29	71.2976	up	Protein of unknown function		ANN03481	3.98891	9.00953e-40	31.2903	26.6549	43.8347	663.036	446.816	493.804	up	Protein of unknown function
ANN03549	3.69842	6.32475e-32	34.7314	31.9317	52.4861	471.166	597.993	450.471	up	Similar to KNTC1: Kinetochore-associated protein 1 (Homo sapiens OX%3D9606)		ANN03497	1.10973	0.000256208	131.866	101.543	169.494	357.019	246.889	264.014	up	Similar to jockey\pol: RNA-directed DNA polymerase from mobile element jockey (Drosophila funebris OX%3D7221)
ANN03550	6.04092	5.16028e-05	0	0	1.54371	13.2412	37.8729	29.9774	up	Protein of unknown function		ANN03518	1.7397	2.54548e-12	86.0483	114.235	124.198	345.863	372.346	360.982	up	Similar to Polr1a: DNA-directed RNA polymerase I subunit RPA1 (Rattus norvegicus OX%3D10116)
ANN03551	2.06222	0.000116783	15.4362	9.27048	26.2431	73.93	79.7325	53.4732	up	Similar to SCD5: Stearoyl-CoA desaturase 5 (Bos taurus OX%3D9913)		ANN03521	2.13582	6.86631e-09	33.5253	22.8471	48.2182	153.805	146.255	156.453	up	Similar to SETMAR: Histone-lysine N-methyltransferase SETMAR (Homo sapiens OX%3D9606)
ANN03552	6.68742	1.55306e-54	7.7181	8.24043	3.08742	721.645	678.39	673.276	up	Similar to Acyl-CoA Delta(11) desaturase (Spodoptera littoralis OX%3D7109)		ANN03527	1.12398	6.65201e-07	215.68	191.662	176.8	382.521	470.968	421.282	up	Similar to Cda: Cytidine deaminase (Mus musculus OX%3D10090)
ANN03556	2.32031	4.39023e-18	91.6524	140.087	121.953	569.371	585.369	608.46	up	Similar to pif1: ATP-dependent DNA helicase PIF1 (Danio rerio OX%3D7955)		ANN03528	2.34456	4.37943e-23	281.613	204.354	156.344	1020.06	1140.52	1113.91	up	Similar to WDR36: WD repeat-containing protein 36 (Homo sapiens OX%3D9606)
ANN03576	4.84093	0.0203945	0	0	0	7.72403	3.32219	7.2918	up	Similar to Transposable element Tcb2 transposase (Caenorhabditis briggsae OX%3D6238)		ANN03529	1.58365	1.53162e-17	765.495	811.071	884	2909.55	2287.75	2174.86	up	Similar to B0272.3: Probable 3-hydroxyacyl-CoA dehydrogenase B0272.3 (Caenorhabditis elegans OX%3D6239)
ANN03578	2.07302	9.61289e-14	145.679	163.778	203.77	808.816	558.792	785.083	up	Similar to tma16: Translation machinery-associated protein 16 (Danio rerio OX%3D7955)		ANN03532	1.95091	1.36702e-10	56.9931	43.1556	56.9851	227.122	190.534	189.862	up	Similar to Gins1: DNA replication complex GINS protein PSF1 (Mus musculus OX%3D10090)
ANN03585	2.65856	1.34562e-15	70.4276	81.3742	97.2537	729.369	383.38	454.522	up	Similar to Mthfd2: Bifunctional methylenetetrahydrofolate dehydrogenase/cyclohydrolase%2C mitochondrial (Mus musculus OX%3D10090)		ANN03533	1.73215	1.10418e-09	117.339	110.428	93.5141	450.259	270.37	349.574	up	Protein of unknown function
ANN03600	1.0145	5.15056e-06	446.685	446.013	487.812	903.712	991.34	891.219	up	Similar to MAN2B1: Lysosomal alpha-mannosidase (Bos taurus OX%3D9913)		ANN03534	1.5043	8.23064e-28	6292.7	6360.37	6021.43	18354.6	16911.2	17713.4	up	Similar to RpL34: 60S ribosomal protein L34 (Aedes albopictus OX%3D7160)
ANN03602	1.61802	3.31968e-07	179.446	182.319	305.655	829.782	544.174	666.794	up	Similar to Transposable element Tcb2 transposase (Caenorhabditis briggsae OX%3D6238)		ANN03541	1.79343	0.00729465	10.0576	22.8471	5.84463	37.4552	42.2664	55.4104	up	Similar to Slc22a5: Solute carrier family 22 member 5 (Mus musculus OX%3D10090)
ANN03603	2.29454	8.14791e-20	2742.82	3372.39	3757.39	19846.3	12916	15665.2	up	Similar to Elongation factor 1-beta (Artemia salina OX%3D85549)		ANN03549	3.30121	1.29769e-34	65.9331	45.6942	43.8347	471.776	592.4	479.137	up	Similar to KNTC1: Kinetochore-associated protein 1 (Homo sapiens OX%3D9606)
ANN03604	1.98248	2.10137e-16	309.689	316.226	291.761	1388.12	986.689	1255.81	up	Similar to RIOK1: Serine/threonine-protein kinase RIO1 (Homo sapiens OX%3D9606)		ANN03550	5.09682	0.000123878	0	0	2.92231	30.2829	37.5701	21.1863	up	Protein of unknown function
ANN03618	1.08493	0.0235511	48.2381	30.9016	33.9616	56.2751	104.981	78.5894	up	Similar to Vgll4: Transcription cofactor vestigial-like protein 4 (Mus musculus OX%3D10090)		ANN03552	5.50601	3.31214e-47	15.6452	15.2314	8.76694	438.305	800.377	589.143	up	Similar to Acyl-CoA Delta(11) desaturase (Spodoptera littoralis OX%3D7109)
ANN03624	2.02442	2.65652e-10	60.78	92.7048	52.4861	286.893	286.372	270.607	up	Similar to Cntrob: Centrobin (Mus musculus OX%3D10090)		ANN03556	2.54055	7.52224e-16	73.7557	81.2341	106.664	723.602	393.815	400.096	up	Similar to pif1: ATP-dependent DNA helicase PIF1 (Danio rerio OX%3D7955)
ANN03632	1.79244	0.000544494	18.3305	20.6011	21.6119	103.723	53.8194	52.663	up	Similar to Ift22: Intraflagellar transport protein 22 homolog (Mus musculus OX%3D10090)		ANN03578	1.95672	3.61704e-16	131.866	194.2	156.344	661.442	521.956	687.741	up	Similar to tma16: Translation machinery-associated protein 16 (Danio rerio OX%3D7955)
ANN03650	1.50046	0.000419589	37.6257	42.2322	37.049	111.447	144.847	74.5384	up	Similar to Smc5: Structural maintenance of chromosomes protein 5 (Mus musculus OX%3D10090)		ANN03585	2.70053	4.11991e-26	72.6382	86.3112	61.3686	545.889	411.929	478.322	up	Similar to Mthfd2: Bifunctional methylenetetrahydrofolate dehydrogenase/cyclohydrolase%2C mitochondrial (Mus musculus OX%3D10090)
ANN03662	1.72406	4.42033e-10	138.926	187.47	146.652	621.233	465.106	479.638	up	Similar to KHK: Ketohexokinase (Homo sapiens OX%3D9606)		ANN03596	1.08982	1.1067e-05	163.157	182.777	165.111	381.724	295.194	411.504	up	Similar to HNRNPR: Heterogeneous nuclear ribonucleoprotein R (Homo sapiens OX%3D9606)
ANN03676	2.03942	0.000109248	217.071	79.3141	111.147	1041.64	257.137	381.604	up	Similar to DHRS11: Dehydrogenase/reductase SDR family member 11 (Homo sapiens OX%3D9606)		ANN03600	1.17265	1.18979e-11	457.062	435.364	455.881	1067.07	949.316	1023.46	up	Similar to MAN2B1: Lysosomal alpha-mannosidase (Bos taurus OX%3D9913)
ANN03677	1.06199	0.0456942	30.8724	20.6011	29.3305	67.3094	38.5374	63.1956	up	Similar to SDR-1: Farnesol dehydrogenase (Aedes aegypti OX%3D7159)		ANN03602	1.15843	2.81643e-05	147.511	253.856	173.878	427.945	371.676	484.026	up	Similar to Transposable element Tcb2 transposase (Caenorhabditis briggsae OX%3D6238)
ANN03685	1.84237	1.75994e-18	676.298	779.75	736.35	2814.86	2398.62	2648.54	up	Similar to stc: Protein shuttle craft (Drosophila melanogaster OX%3D7227)		ANN03603	1.50453	2.27513e-18	3936.99	4208.94	4105.85	13121.3	9613.92	12027.3	up	Similar to Elongation factor 1-beta (Artemia salina OX%3D85549)
ANN03690	2.02194	5.49074e-21	3233.88	3805.02	3876.26	15987.6	12745.9	15592.3	up	Similar to eIF-5A: Eukaryotic translation initiation factor 5A (Spodoptera frugiperda OX%3D7108)		ANN03604	1.46161	1.00981e-16	393.364	357.938	372.595	984.991	1004.33	1107.39	up	Similar to RIOK1: Serine/threonine-protein kinase RIO1 (Homo sapiens OX%3D9606)
ANN03696	1.81234	2.34525e-06	60.78	80.3442	132.759	428.132	249.164	277.088	up	Similar to nsmce2: E3 SUMO-protein ligase NSE2 (Xenopus laevis OX%3D8355)		ANN03624	2.14162	1.02474e-10	35.7603	78.6955	54.0628	252.623	230.117	258.31	up	Similar to Cntrob: Centrobin (Mus musculus OX%3D10090)
ANN03706	1.035	1.03723e-05	446.685	491.335	418.345	1041.64	863.768	877.446	up	Similar to Cops4: COP9 signalosome complex subunit 4 (Mus musculus OX%3D10090)		ANN03650	1.80252	0.000106109	23.4677	16.5007	39.4512	109.975	79.1655	85.5602	up	Similar to Smc5: Structural maintenance of chromosomes protein 5 (Mus musculus OX%3D10090)
ANN03712	1.6519	1.13524e-07	66.5686	96.825	74.0981	275.858	253.151	218.754	up	Similar to RpI135: DNA-directed RNA polymerase I subunit RPA2 (Drosophila melanogaster OX%3D7227)		ANN03662	1.26769	9.33128e-07	191.094	133.275	143.193	421.57	322.7	384.613	up	Similar to KHK: Ketohexokinase (Homo sapiens OX%3D9606)
ANN03719	1.79714	0.000120038	20.26	20.6011	23.1557	86.0678	55.1483	81.02	up	Similar to Cad89D: Cadherin-89D (Drosophila melanogaster OX%3D7227)		ANN03676	1.21409	0.00155372	135.219	123.12	94.9752	408.022	254.269	158.897	up	Similar to DHRS11: Dehydrogenase/reductase SDR family member 11 (Homo sapiens OX%3D9606)
ANN03723	1.55713	9.13861e-10	190.058	242.063	199.139	689.646	547.496	623.043	up	Similar to Ppan: Suppressor of SWI4 1 homolog (Mus musculus OX%3D10090)		ANN03685	1.66745	1.33202e-23	613.513	600.371	705.739	2172.4	1969.75	1951.59	up	Similar to stc: Protein shuttle craft (Drosophila melanogaster OX%3D7227)
ANN03724	1.59256	4.68987e-09	144.714	223.522	194.507	601.371	521.583	572.811	up	Similar to GRHPR: Glyoxylate reductase/hydroxypyruvate reductase (Homo sapiens OX%3D9606)		ANN03690	1.83594	4.48389e-43	3964.93	3952.55	3895.44	14029	13947.2	14197.3	up	Similar to eIF-5A: Eukaryotic translation initiation factor 5A (Spodoptera frugiperda OX%3D7108)
ANN03727	2.00507	1.57152e-10	189.093	115.366	114.235	443.58	647.826	594.686	up	Similar to NPC1: NPC intracellular cholesterol transporter 1 (Sus scrofa OX%3D9823)		ANN03696	1.76446	2.53764e-11	81.5783	73.6184	67.2132	266.171	245.547	246.087	up	Similar to nsmce2: E3 SUMO-protein ligase NSE2 (Xenopus laevis OX%3D8355)
ANN03728	2.63372	0.00803367	6.75333	3.09016	0	24.2755	13.9532	27.5468	up	Protein of unknown function		ANN03712	1.46111	3.99801e-07	102.811	101.543	119.815	217.559	340.814	332.462	up	Similar to RpI135: DNA-directed RNA polymerase I subunit RPA2 (Drosophila melanogaster OX%3D7227)
ANN03729	5.80031	7.15939e-14	1.92952	4.12021	0	71.7231	126.243	171.762	up	Similar to HINT1: Histidine triad nucleotide-binding protein 1 (Homo sapiens OX%3D9606)		ANN03714	1.93144	0.00033171	16.7627	15.2314	14.6116	41.4398	73.7984	62.7441	up	Similar to RpI135: DNA-directed RNA polymerase I subunit RPA2 (Drosophila melanogaster OX%3D7227)
ANN03731	1.38372	3.19235e-08	439.931	367.729	351.966	924.677	906.957	1197.47	up	Similar to SAE1: SUMO-activating enzyme subunit 1 (Bos taurus OX%3D9913)		ANN03719	1.66593	0.00355609	18.9977	11.4235	27.762	84.4734	42.9372	56.2253	up	Similar to Cad89D: Cadherin-89D (Drosophila melanogaster OX%3D7227)
ANN03733	1.55257	1.41025e-11	482.381	634.513	614.397	1786.46	1562.76	1726.54	up	Similar to rad50: DNA repair protein RAD50 (Drosophila melanogaster OX%3D7227)		ANN03723	1.47318	2.58674e-12	307.315	219.586	255.702	688.538	772.87	713.816	up	Similar to Ppan: Suppressor of SWI4 1 homolog (Mus musculus OX%3D10090)
ANN03740	1.09195	0.000350079	158.221	160.688	163.633	318.892	270.426	439.128	up	Protein of unknown function		ANN03724	1.47992	7.93095e-12	184.389	180.238	172.417	568.203	472.981	457.951	up	Similar to GRHPR: Glyoxylate reductase/hydroxypyruvate reductase (Homo sapiens OX%3D9606)
ANN03745	1.39203	5.29011e-07	499.747	736.488	666.883	2042.45	1319.57	1632.55	up	Similar to nac: GDP-fucose transporter 1 (Drosophila melanogaster OX%3D7227)		ANN03729	9.93769	5.23801e-15	0	0	0	156.993	293.852	238.754	up	Similar to HINT1: Histidine triad nucleotide-binding protein 1 (Homo sapiens OX%3D9606)
ANN03757	1.22612	0.000204929	82.0048	122.576	78.7292	193.101	241.191	230.097	up	Similar to eipr1: EARP-interacting protein homolog (Danio rerio OX%3D7955)		ANN03731	1.3477	5.0962e-13	479.412	436.633	372.595	1038.38	1085.51	1160.36	up	Similar to SAE1: SUMO-activating enzyme subunit 1 (Bos taurus OX%3D9913)
ANN03758	7.06024	9.39953e-24	3.85905	2.06011	0	347.581	209.298	335.423	up	Protein of unknown function		ANN03733	1.34428	1.30198e-11	415.714	533.099	445.653	1284.63	1019.76	1236.14	up	Similar to rad50: DNA repair protein RAD50 (Drosophila melanogaster OX%3D7227)
ANN03763	1.06829	0.00113608	355.997	258.543	231.557	427.029	585.369	764.018	up	Similar to tubgcp3: Gamma-tubulin complex component 3 homolog (Xenopus laevis OX%3D8355)		ANN03745	1.59676	9.79643e-20	506.232	449.326	464.648	1560.37	1295.5	1442.3	up	Similar to nac: GDP-fucose transporter 1 (Drosophila melanogaster OX%3D7227)
ANN03765	1.66025	2.9635e-10	202.6	227.642	177.527	527.441	663.108	733.231	up	Protein of unknown function		ANN03758	7.84546	2.20001e-23	2.23502	0	2.92231	319.564	403.878	443.283	up	Protein of unknown function
ANN03786	2.10717	5.16275e-11	103.23	154.508	101.885	606.888	369.427	578.482	up	Similar to dnk: Deoxynucleoside kinase (Drosophila melanogaster OX%3D7227)		ANN03762	1.14125	2.53683e-10	383.306	394.747	419.352	950.724	847.34	841.749	up	Similar to SRM: Spermidine synthase (Homo sapiens OX%3D9606)
ANN03788	1.71964	0.0193084	5.78857	11.3306	7.71855	23.1721	24.5842	34.0284	up	Similar to Tk2: Thymidine kinase 2%2C mitochondrial (Mus musculus OX%3D10090)		ANN03763	1.05214	9.61891e-07	233.56	256.395	226.479	523.575	433.398	529.658	up	Similar to tubgcp3: Gamma-tubulin complex component 3 homolog (Xenopus laevis OX%3D8355)
ANN03789	1.56848	6.90294e-07	63.6743	92.7048	78.7292	217.376	212.62	266.556	up	Similar to Retrovirus-related Pol polyprotein from type-1 retrotransposable element R2 (Fragment) (Nasonia vitripennis OX%3D7425)		ANN03765	1.80972	1.79107e-16	201.152	148.506	169.494	644.707	631.983	545.955	up	Protein of unknown function
ANN03804	1.03552	9.62854e-06	898.193	915.717	1020.39	2243.28	1660.43	1905.59	up	Similar to faf2-b: FAS-associated factor 2-B (Xenopus laevis OX%3D8355)		ANN03777	1.36557	4.59251e-09	132.984	142.16	150.499	365.786	326.726	403.355	up	Similar to bre-4: Beta-1%2C4-N-acetylgalactosaminyltransferase bre-4 (Caenorhabditis elegans OX%3D6239)
ANN03818	2.69241	1.77722e-28	128.313	161.718	129.672	922.47	827.224	968.188	up	Protein of unknown function		ANN03786	2.20008	5.54719e-18	120.691	110.428	73.0579	500.465	434.069	470.988	up	Similar to dnk: Deoxynucleoside kinase (Drosophila melanogaster OX%3D7227)
ANN03820	1.51476	3.25564e-10	250.838	229.702	197.595	647.715	682.377	612.511	up	Similar to RRS1: Ribosome biogenesis regulatory protein homolog (Bos taurus OX%3D9913)		ANN03788	2.618	0.00185811	3.35253	5.07713	4.38347	27.8921	23.4813	26.8903	up	Similar to Tk2: Thymidine kinase 2%2C mitochondrial (Mus musculus OX%3D10090)
ANN03822	3.0796	5.43594e-16	49.2029	69.0136	20.0682	375.167	378.729	436.698	up	Similar to Fancd2: Fanconi anemia group D2 protein homolog (Rattus norvegicus OX%3D10116)		ANN03818	3.1159	4.92683e-34	102.811	59.6563	119.815	805.685	816.479	818.933	up	Protein of unknown function
ANN03826	1.1328	0.0460544	29.9076	14.4207	27.7868	49.6545	39.8662	68.0568	up	Similar to CycT: Cyclin-T (Drosophila melanogaster OX%3D7227)		ANN03820	1.88761	1.28301e-21	208.975	175.161	198.717	706.07	767.503	683.667	up	Similar to RRS1: Ribosome biogenesis regulatory protein homolog (Bos taurus OX%3D9913)
ANN03827	2.23854	6.75234e-12	1243.58	1620.27	2256.9	11128.1	5552.04	7475.71	up	Similar to RpL38: 60S ribosomal protein L38 (Maconellicoccus hirsutus OX%3D177089)		ANN03822	3.01113	2.1599e-21	71.5207	45.6942	33.6066	353.832	376.372	498.694	up	Similar to Fancd2: Fanconi anemia group D2 protein homolog (Rattus norvegicus OX%3D10116)
ANN03834	1.13689	0.0129625	64.639	38.112	33.9616	72.8266	120.928	108.567	up	Similar to CycT: Cyclin-T (Drosophila melanogaster OX%3D7227)		ANN03826	1.77224	0.00149242	8.94009	19.0392	20.4562	54.9874	60.3805	48.0767	up	Similar to CycT: Cyclin-T (Drosophila melanogaster OX%3D7227)
ANN03835	1.87569	1.10808e-10	414.848	388.33	438.414	1264.53	1177.38	2112.19	up	Similar to RpL38: 60S ribosomal protein L38 (Maconellicoccus hirsutus OX%3D177089)		ANN03827	1.52405	1.86759e-18	1537.69	1848.08	1830.83	5459.69	4333.98	5206.13	up	Similar to RpL38: 60S ribosomal protein L38 (Maconellicoccus hirsutus OX%3D177089)
ANN03843	7.83632	3.39594e-32	3.85905	2.06011	0	499.855	528.892	505.565	up	Similar to BicC: Protein bicaudal C (Drosophila melanogaster OX%3D7227)		ANN03835	1.01551	4.1763e-06	955.472	885.959	895.689	1960.42	1366.61	2208.27	up	Similar to RpL38: 60S ribosomal protein L38 (Maconellicoccus hirsutus OX%3D177089)
ANN03844	8.59222	5.47391e-11	0	0	0	79.4472	85.048	81.02	up	Similar to bicc1-b: Protein bicaudal C homolog 1-B (Xenopus laevis OX%3D8355)		ANN03843	8.5644	6.01584e-15	0	2.53856	0	368.973	246.889	344.685	up	Similar to BicC: Protein bicaudal C (Drosophila melanogaster OX%3D7227)
ANN03852	8.17259	2.98763e-10	20.26	2.06011	0	2052.39	2192.64	2343.1	up	Similar to bicc1-b: Protein bicaudal C homolog 1-B (Xenopus laevis OX%3D8355)		ANN03844	8.15952	7.62722e-10	0	0	0	70.9257	65.0768	65.1887	up	Similar to bicc1-b: Protein bicaudal C homolog 1-B (Xenopus laevis OX%3D8355)
ANN03864	1.65265	8.98514e-11	163.045	181.289	219.207	604.681	530.885	630.335	up	Similar to Tsen2: tRNA-splicing endonuclease subunit Sen2 (Mus musculus OX%3D10090)		ANN03849	2.52281	0.0362534	6.70507	0	2.92231	22.3137	7.37984	26.8903	up	Similar to GTF2IRD2: General transcription factor II-I repeat domain-containing protein 2 (Bos taurus OX%3D9913)
ANN03886	3.69385	3.03018e-08	5.78857	7.21037	0	63.9991	61.7927	56.714	up	Similar to liph-a: Lipase member H-A (Xenopus laevis OX%3D8355)		ANN03852	8.95931	4.26533e-72	0	5.07713	8.76694	2331.78	2036.84	1985.81	up	Similar to bicc1-b: Protein bicaudal C homolog 1-B (Xenopus laevis OX%3D8355)
ANN03887	4.79232	2.49552e-06	2.89429	0	1.54371	58.4819	44.5173	21.8754	up	Protein of unknown function		ANN03864	1.0215	4.04262e-06	219.032	234.817	208.945	510.825	404.549	431.06	up	Similar to Tsen2: tRNA-splicing endonuclease subunit Sen2 (Mus musculus OX%3D10090)
ANN03892	1.86692	0.00684334	14.4714	11.3306	3.08742	30.8961	38.5374	39.6998	up	Similar to chtf18: Chromosome transmission fidelity protein 18 homolog (Xenopus laevis OX%3D8355)		ANN03886	3.34254	2.47467e-06	5.58755	1.26928	8.76694	57.3781	57.6969	40.7429	up	Similar to liph-a: Lipase member H-A (Xenopus laevis OX%3D8355)
ANN03893	1.84841	0.000126331	15.4362	26.7814	15.4371	72.8266	71.7592	64.816	up	Similar to chtf18: Chromosome transmission fidelity protein 18 homolog (Xenopus laevis OX%3D8355)		ANN03887	3.23933	0.00348564	8.94009	0	0	19.126	33.5447	36.6686	up	Protein of unknown function
ANN03902	6.07183	6.87774e-12	0.964762	2.06011	3.08742	244.962	93.6856	50.2324	up	Similar to Oatp74D: Solute carrier organic anion transporter family member 74D (Drosophila melanogaster OX%3D7227)		ANN03892	2.48053	0.000469998	21.2327	5.07713	2.92231	60.5658	46.2917	61.1144	up	Similar to chtf18: Chromosome transmission fidelity protein 18 homolog (Xenopus laevis OX%3D8355)
ANN03903	2.08196	0.00727817	19.2952	2.06011	9.26226	63.9991	36.544	30.7876	up	Similar to Oatp74D: Solute carrier organic anion transporter family member 74D (Drosophila melanogaster OX%3D7227)		ANN03893	2.37816	3.26532e-06	13.4101	19.0392	8.76694	70.9257	81.1782	63.559	up	Similar to chtf18: Chromosome transmission fidelity protein 18 homolog (Xenopus laevis OX%3D8355)
ANN03915	1.26875	2.55799e-05	96.4762	131.847	120.409	282.479	237.869	319.219	up	Protein of unknown function		ANN03902	4.78813	0.0165575	0	13.9621	0	123.522	158.331	104.302	up	Similar to Oatp74D: Solute carrier organic anion transporter family member 74D (Drosophila melanogaster OX%3D7227)
ANN03920	1.6127	0.026981	10.6124	22.6612	24.6994	116.964	29.2352	30.7876	up	Similar to Oatp74D: Solute carrier organic anion transporter family member 74D (Drosophila melanogaster OX%3D7227)		ANN03903	5.38228	3.67107e-05	2.23502	0	0	43.8305	28.1776	31.7795	up	Similar to Oatp74D: Solute carrier organic anion transporter family member 74D (Drosophila melanogaster OX%3D7227)
ANN03921	3.98375	3.58203e-07	3.85905	0	6.17484	48.551	42.524	56.714	up	Similar to SLC28A1: Sodium/nucleoside cotransporter 1 (Sus scrofa OX%3D9823)		ANN03920	2.02728	0.0261321	11.1751	12.6928	0	47.8151	22.1395	29.3349	up	Similar to Oatp74D: Solute carrier organic anion transporter family member 74D (Drosophila melanogaster OX%3D7227)
ANN03923	6.81134	6.49755e-06	0	0	0	38.6202	17.9398	15.3938	up	Similar to Slc28a3: Solute carrier family 28 member 3 (Rattus norvegicus OX%3D10116)		ANN03921	4.05799	2.62195e-08	5.58755	5.07713	0	51.7997	73.7984	60.2996	up	Similar to SLC28A1: Sodium/nucleoside cotransporter 1 (Sus scrofa OX%3D9823)
ANN03936	5.65449	7.89685e-06	1.92952	0	0	46.3442	31.893	34.0284	up	Similar to Slc28a3: Solute carrier family 28 member 3 (Rattus norvegicus OX%3D10116)		ANN03923	1.77847	0.0376565	15.6452	10.1543	7.30579	9.56302	62.3932	42.3727	up	Similar to Slc28a3: Solute carrier family 28 member 3 (Rattus norvegicus OX%3D10116)
ANN03937	3.64703	1.10842e-13	6.75333	15.4508	6.17484	137.929	107.639	118.289	up	Similar to SLC28A1: Sodium/nucleoside cotransporter 1 (Sus scrofa OX%3D9823)		ANN03929	1.11564	1.28062e-07	587.811	855.496	775.874	1596.23	1800.01	1408.89	up	Similar to Pisd: Phosphatidylserine decarboxylase proenzyme%2C mitochondrial (Mus musculus OX%3D10090)
ANN03946	1.65895	7.07031e-12	203.565	223.522	240.819	793.368	653.142	660.313	up	Similar to Nup107: Nuclear pore complex protein Nup107 (Drosophila melanogaster OX%3D7227)		ANN03937	2.68274	4.92143e-11	25.7028	25.3856	11.6893	121.929	150.28	136.081	up	Similar to SLC28A1: Sodium/nucleoside cotransporter 1 (Sus scrofa OX%3D9823)
ANN03954	1.07522	0.00180242	90.6876	67.9835	100.341	153.377	174.083	215.513	up	Protein of unknown function		ANN03946	2.79946	2.01954e-09	79.3433	40.617	49.6793	616.018	144.913	424.541	up	Similar to Nup107: Nuclear pore complex protein Nup107 (Drosophila melanogaster OX%3D7227)
ANN03961	1.31408	3.83882e-06	177.516	248.243	191.42	438.063	483.71	613.321	up	Similar to ANOS1: Anosmin-1 (Homo sapiens OX%3D9606)		ANN03954	1.18248	0.000158218	68.1682	60.9256	80.3636	156.196	174.433	143.415	up	Protein of unknown function
ANN03965	2.62601	8.63088e-26	135.067	195.71	177.527	1091.3	954.796	1087.29	up	Similar to nip7: 60S ribosome subunit biogenesis protein NIP7 homolog (Xenopus tropicalis OX%3D8364)		ANN03961	1.45918	1.91821e-10	137.454	178.969	195.795	486.917	456.879	460.395	up	Similar to ANOS1: Anosmin-1 (Homo sapiens OX%3D9606)
ANN03971	1.14579	0.000143489	145.679	111.246	95.71	267.031	259.795	257.643	up	Similar to Brms1l: Breast cancer metastasis-suppressor 1-like protein (Mus musculus OX%3D10090)		ANN03962	2.60662	3.97121e-05	6.70507	10.1543	11.6893	74.9103	31.532	66.0036	up	Similar to cut-1: Cuticlin-1 (Caenorhabditis elegans OX%3D6239)
ANN03972	1.46486	6.05571e-05	62.7095	59.7431	37.049	147.86	132.223	165.281	up	Similar to MLH1: DNA mismatch repair protein MLH1 (Arabidopsis thaliana OX%3D3702)		ANN03965	2.58633	4.25082e-22	124.044	137.082	165.111	593.704	1074.77	884.937	up	Similar to nip7: 60S ribosome subunit biogenesis protein NIP7 homolog (Xenopus tropicalis OX%3D8364)
ANN03990	2.2174	1.95869e-07	15.4362	31.9317	26.2431	124.688	100.994	115.048	up	Similar to Sec22a: Vesicle-trafficking protein SEC22a (Rattus norvegicus OX%3D10116)		ANN03990	2.33894	5.93968e-07	18.9977	15.2314	27.762	142.648	78.4947	90.4493	up	Similar to Sec22a: Vesicle-trafficking protein SEC22a (Rattus norvegicus OX%3D10116)
ANN03995	1.95972	0.000189669	27.0133	8.24043	24.6994	86.0678	71.0948	74.5384	up	Similar to Sec22a: Vesicle-trafficking protein SEC22a (Rattus norvegicus OX%3D10116)		ANN03995	2.08254	0.00019529	7.82258	13.9621	20.4562	58.175	66.4186	51.3361	up	Similar to Sec22a: Vesicle-trafficking protein SEC22a (Rattus norvegicus OX%3D10116)
ANN04009	8.08753	8.99353e-19	1.92952	1.03005	0	280.272	314.943	320.839	up	Protein of unknown function		ANN04009	9.96471	3.37818e-15	0	0	0	306.814	203.281	193.122	up	Protein of unknown function
ANN04023	1.68941	9.03104e-05	34.7314	37.0819	18.5245	114.757	89.699	92.3627	up	Similar to slc17a7: Vesicular glutamate transporter 1 (Xenopus laevis OX%3D8355)		ANN04020	1.63896	0.00479199	24.5852	11.4235	13.1504	58.972	55.6842	39.9281	up	Similar to E(spl)mgamma-HLH: Enhancer of split mgamma protein (Drosophila melanogaster OX%3D7227)
ANN04030	2.04596	1.78773e-13	69.4629	83.4343	78.7292	338.754	319.594	297.343	up	Similar to brix1: Ribosome biogenesis protein BRX1 homolog (Xenopus laevis OX%3D8355)		ANN04023	1.55991	6.19186e-05	29.0553	45.6942	32.1455	99.6148	114.052	101.042	up	Similar to slc17a7: Vesicular glutamate transporter 1 (Xenopus laevis OX%3D8355)
ANN04034	6.82533	7.95354e-33	0	4.12021	9.26226	540.682	339.527	446.42	up	Protein of unknown function		ANN04030	2.31212	3.80539e-18	93.8709	60.9256	73.0579	417.585	340.143	378.094	up	Similar to brix1: Ribosome biogenesis protein BRX1 homolog (Xenopus laevis OX%3D8355)
ANN04041	2.00201	7.91822e-12	84.899	119.486	84.9041	450.201	358.132	354.867	up	Similar to MOGAT1: 2-acylglycerol O-acyltransferase 1 (Bos taurus OX%3D9913)		ANN04031	1.15199	5.30432e-05	128.514	135.813	160.727	252.623	401.866	287.645	up	Similar to Mvl: Protein Malvolio (Drosophila melanogaster OX%3D7227)
ANN04058	2.10284	1.18118e-13	183.305	206.011	279.412	1177.36	786.029	900.132	up	Similar to mblac1: Metallo-beta-lactamase domain-containing protein 1 (Xenopus laevis OX%3D8355)		ANN04034	6.94013	2.28654e-25	0	2.53856	5.84463	308.407	369.663	264.829	up	Protein of unknown function
ANN04062	2.17861	2.26455e-20	174.622	184.38	175.983	866.195	711.612	845.848	up	Similar to pol: Retrovirus-related Pol polyprotein from transposon 17.6 (Drosophila melanogaster OX%3D7227)		ANN04041	2.28503	3.90502e-18	100.576	87.5805	65.7521	404.835	474.322	364.242	up	Similar to MOGAT1: 2-acylglycerol O-acyltransferase 1 (Bos taurus OX%3D9913)
ANN04064	1.92428	4.16897e-05	22.1895	26.7814	20.0682	114.757	59.1349	90.7423	up	Similar to slc17a7: Vesicular glutamate transporter 1 (Xenopus tropicalis OX%3D8364)		ANN04058	1.80372	1.05259e-15	193.329	228.471	191.412	844.734	593.071	704.038	up	Similar to mblac1: Metallo-beta-lactamase domain-containing protein 1 (Xenopus laevis OX%3D8355)
ANN04068	2.08885	4.5534e-20	399.411	483.095	418.345	2098.73	1647.8	1790.54	up	Similar to Rfc2: Replication factor C subunit 2 (Rattus norvegicus OX%3D10116)		ANN04062	2.12396	9.93299e-20	158.687	144.698	227.941	820.029	796.352	691.815	up	Similar to pol: Retrovirus-related Pol polyprotein from transposon 17.6 (Drosophila melanogaster OX%3D7227)
ANN04071	2.03144	2.42368e-16	4972.38	5266.66	5236.27	27336.4	18804.2	17126	up	Similar to rpl22: 60S ribosomal protein L22 (Xenopus tropicalis OX%3D8364)		ANN04064	1.72592	0.0001634	26.8203	30.4628	42.3736	79.6918	160.344	87.1899	up	Similar to slc17a7: Vesicular glutamate transporter 1 (Xenopus tropicalis OX%3D8364)
ANN04074	2.08279	3.19601e-11	67.5333	53.5628	61.7484	283.582	209.298	282.76	up	Similar to TEX10: Testis-expressed protein 10 (Homo sapiens OX%3D9606)		ANN04068	1.6096	7.90133e-20	392.246	492.482	467.57	1404.97	1356.55	1361.63	up	Similar to Rfc2: Replication factor C subunit 2 (Rattus norvegicus OX%3D10116)
ANN04088	2.84287	1.13803e-08	23.1543	8.24043	43.2239	217.376	147.505	156.369	up	Similar to pol: Retrovirus-related Pol polyprotein from transposon 297 (Drosophila melanogaster OX%3D7227)		ANN04071	1.52316	1.01103e-26	6319.52	6124.29	6132.48	17377.6	16814	19202.1	up	Similar to rpl22: 60S ribosomal protein L22 (Xenopus tropicalis OX%3D8364)
ANN04114	1.24755	2.45933e-05	100.335	108.156	114.235	210.756	271.755	281.139	up	Similar to Tfam: Transcription factor A%2C mitochondrial (Rattus norvegicus OX%3D10116)		ANN04074	2.40141	2.34672e-12	56.9931	43.1556	29.2231	254.217	181.812	254.236	up	Similar to TEX10: Testis-expressed protein 10 (Homo sapiens OX%3D9606)
ANN04115	1.157	3.66721e-05	219.001	220.431	199.139	371.857	481.053	571.191	up	Similar to NMT1: Glycylpeptide N-tetradecanoyltransferase 1 (Homo sapiens OX%3D9606)		ANN04085	2.42174	0.00698881	146.394	87.5805	75.9802	120.335	892.961	648.628	up	Similar to CYB561: Cytochrome b561 (Homo sapiens OX%3D9606)
ANN04123	1.10597	0.00897976	34.7314	51.5027	52.4861	120.274	100.33	76.969	up	Similar to Tfam: Transcription factor A%2C mitochondrial (Rattus norvegicus OX%3D10116)		ANN04088	2.31495	3.42195e-10	24.5852	24.1164	29.2231	119.538	135.521	131.192	up	Similar to pol: Retrovirus-related Pol polyprotein from transposon 297 (Drosophila melanogaster OX%3D7227)
ANN04125	1.29122	3.32573e-06	157.256	222.492	154.371	450.201	453.146	406.72	up	Similar to ADTRP: Androgen-dependent TFPI-regulating protein (Homo sapiens OX%3D9606)		ANN04114	1.18891	0.00675784	37.9954	69.8105	55.524	133.882	159.673	77.4116	up	Similar to Tfam: Transcription factor A%2C mitochondrial (Rattus norvegicus OX%3D10116)
ANN04127	1.4023	1.17944e-06	99.3705	103.005	97.2537	244.962	241.191	306.255	up	Similar to CG5902: Uncharacterized protein CG5902 (Drosophila melanogaster OX%3D7227)		ANN04125	3.1175	1.56337e-32	46.9355	40.617	55.524	445.477	396.499	395.207	up	Similar to ADTRP: Androgen-dependent TFPI-regulating protein (Homo sapiens OX%3D9606)
ANN04128	1.21494	1.28116e-05	121.56	141.117	172.896	345.374	340.192	320.839	up	Protein of unknown function		ANN04128	1.12996	0.0371306	79.3433	58.387	111.048	297.251	65.0768	181.714	up	Protein of unknown function
ANN04131	1.122	0.000449619	96.4762	113.306	165.177	269.238	255.808	285.19	up	Protein of unknown function		ANN04149	3.77534	3.16873e-13	6.70507	12.6928	5.84463	136.273	124.786	85.5602	up	Similar to vat1: Synaptic vesicle membrane protein VAT-1 homolog (Danio rerio OX%3D7955)
ANN04146	1.1314	8.59734e-06	191.988	185.41	225.382	415.994	428.562	472.346	up	Similar to Tret1-2: Facilitated trehalose transporter Tret1-2 homolog (Drosophila sechellia OX%3D7238)		ANN04172	1.31621	0.00491349	22.3502	34.2706	52.6017	110.772	84.5327	74.1522	up	Similar to Dffb: DNA fragmentation factor subunit beta (Mus musculus OX%3D10090)
ANN04149	4.16201	7.74292e-21	15.4362	7.21037	20.0682	327.72	177.405	241.439	up	Similar to vat1: Synaptic vesicle membrane protein VAT-1 homolog (Danio rerio OX%3D7955)		ANN04173	5.12283	0.000192708	0	0	2.92231	20.7199	52.3298	17.9269	up	Similar to pol: Retrovirus-related Pol polyprotein from transposon 17.6 (Drosophila melanogaster OX%3D7227)
ANN04166	4.01026	7.59204e-06	5.78857	2.06011	0	79.4472	23.9197	35.6488	up	Similar to CYP4C1: Cytochrome P450 4C1 (Blaberus discoidalis OX%3D6981)		ANN04177	7.08918	4.03954e-118	23.4677	11.4235	10.2281	2037.72	2008.66	2280.79	up	Similar to CG17119: Cystinosin homolog (Drosophila melanogaster OX%3D7227)
ANN04169	1.64484	0.0028026	16.401	17.5109	12.3497	55.1716	37.2085	54.2834	up	Protein of unknown function		ANN04195	1.33009	7.45144e-05	58.1106	58.387	84.7471	147.43	202.61	153.193	up	Similar to Nipped-A: Transcription-associated protein 1 (Drosophila melanogaster OX%3D7227)
ANN04173	3.20492	0.0259693	3.85905	0	0	6.6206	15.9465	16.204	up	Similar to pol: Retrovirus-related Pol polyprotein from transposon 17.6 (Drosophila melanogaster OX%3D7227)		ANN04219	1.94878	0.0490308	5.58755	5.07713	2.92231	11.1569	21.4686	20.3715	up	Similar to NT5DC3: 5'-nucleotidase domain-containing protein 3 (Homo sapiens OX%3D9606)
ANN04177	5.79288	3.97149e-60	25.0838	30.9016	71.0107	2646.03	1875.04	2318.79	up	Similar to CG17119: Cystinosin homolog (Drosophila melanogaster OX%3D7227)		ANN04226	1.01794	0.0452628	49.1705	34.2706	40.9124	129.101	55.0133	68.4481	up	Similar to ARHGAP20: Rho GTPase-activating protein 20 (Homo sapiens OX%3D9606)
ANN04199	1.72895	0.00589962	9.64762	12.3606	24.6994	29.7927	65.7793	54.2834	up	Protein of unknown function		ANN04237	1.32306	0.00699379	31.2903	26.6549	40.9124	120.335	60.3805	66.0036	up	Similar to Rim2: Mitochondrial carrier protein Rim2 (Drosophila melanogaster OX%3D7227)
ANN04251	1.63934	1.29e-06	70.4276	60.7731	63.2921	260.41	172.754	175.003	up	Similar to F58A4.6: Uncharacterized protein F58A4.6 (Caenorhabditis elegans OX%3D6239)		ANN04242	1.83806	0.0145044	6.70507	15.2314	20.4562	75.7073	17.4433	57.0401	up	Similar to FAM120B: Constitutive coactivator of peroxisome proliferator-activated receptor gamma (Bos taurus OX%3D9913)
ANN04266	1.94398	3.73642e-05	38.5905	18.541	15.4371	89.3781	93.6856	101.275	up	Similar to phy-2: Prolyl 4-hydroxylase subunit alpha-2 (Caenorhabditis elegans OX%3D6239)		ANN04247	1.13743	0.000243993	92.7534	126.928	75.9802	241.466	187.18	223.271	up	Similar to nup35: Nucleoporin NUP35 (Xenopus tropicalis OX%3D8364)
ANN04272	2.22035	2.00644e-13	69.4629	95.795	57.1173	338.754	374.078	330.561	up	Similar to CCT1: T-complex protein 1 subunit alpha (Drosophila melanogaster OX%3D7227)		ANN04251	1.01332	0.00216326	79.3433	106.62	73.0579	212.777	150.28	160.527	up	Similar to F58A4.6: Uncharacterized protein F58A4.6 (Caenorhabditis elegans OX%3D6239)
ANN04277	2.23653	6.64293e-19	141.82	182.319	134.303	708.404	678.39	779.412	up	Similar to CCT1: T-complex protein 1 subunit alpha (Drosophila melanogaster OX%3D7227)		ANN04266	4.65372	1.78314e-17	6.70507	2.53856	7.30579	113.959	159.002	141.785	up	Similar to phy-2: Prolyl 4-hydroxylase subunit alpha-2 (Caenorhabditis elegans OX%3D6239)
ANN04278	1.80655	5.70709e-09	81.04	89.6146	67.9233	227.307	277.07	332.992	up	Similar to CCT1: T-complex protein 1 subunit alpha (Drosophila melanogaster OX%3D7227)		ANN04269	1.08766	0.0223669	37.9954	67.272	30.6843	83.6764	128.812	76.5967	up	Similar to Crocc: Rootletin (Mus musculus OX%3D10090)
ANN04288	1.3689	3.54473e-05	109.018	222.492	177.527	487.717	382.051	443.989	up	Similar to tiprl: TIP41-like protein (Xenopus tropicalis OX%3D8364)		ANN04272	1.93063	4.24652e-09	173.214	140.89	156.344	371.364	903.695	518.25	up	Similar to CCT1: T-complex protein 1 subunit alpha (Drosophila melanogaster OX%3D7227)
ANN04290	1.56421	0.0464043	12.5419	14.4207	4.63113	54.0682	20.5976	21.8754	up	Similar to MED24: Mediator of RNA polymerase II transcription subunit 24 (Aedes aegypti OX%3D7159)		ANN04277	2.68052	3.3031e-15	100.576	53.3099	94.9752	713.242	338.131	545.141	up	Similar to CCT1: T-complex protein 1 subunit alpha (Drosophila melanogaster OX%3D7227)
ANN04291	1.03831	0.00828055	55.9562	58.713	44.7676	120.274	85.7124	123.961	up	Similar to MED24: Mediator of RNA polymerase II transcription subunit 24 (Aedes aegypti OX%3D7159)		ANN04278	2.49266	3.6082e-10	27.9378	58.387	37.9901	334.706	185.838	177.639	up	Similar to CCT1: T-complex protein 1 subunit alpha (Drosophila melanogaster OX%3D7227)
ANN04301	1.30076	0.000483521	103.23	110.216	55.5736	263.72	174.747	230.907	up	Similar to MSL2: E3 ubiquitin-protein ligase MSL2 (Homo sapiens OX%3D9606)		ANN04281	1.04188	2.56109e-08	512.937	460.749	528.939	1126.05	1052.63	914.272	up	Similar to Ube4b: Ubiquitin conjugation factor E4 B (Mus musculus OX%3D10090)
ANN04302	1.44718	0.000115893	129.278	61.8032	115.778	349.788	218.6	268.176	up	Similar to ORC4: Origin recognition complex subunit 4 (Bos taurus OX%3D9913)		ANN04288	1.52459	1.66325e-10	115.104	128.198	124.198	396.865	319.346	340.611	up	Similar to tiprl: TIP41-like protein (Xenopus tropicalis OX%3D8364)
ANN04324	2.23415	1.30402e-07	28.9429	29.8715	27.7868	83.8609	160.794	162.04	up	Similar to zc2hc1a: Zinc finger C2HC domain-containing protein 1A (Xenopus laevis OX%3D8355)		ANN04301	1.10986	0.00235658	68.1682	58.387	87.6694	202.417	130.154	128.748	up	Similar to MSL2: E3 ubiquitin-protein ligase MSL2 (Homo sapiens OX%3D9606)
ANN04325	2.37775	0.0208247	14.4714	2.06011	0	22.0687	48.5039	19.4448	up	Similar to zc2hc1a: Zinc finger C2HC domain-containing protein 1A (Danio rerio OX%3D7955)		ANN04302	1.89531	1.29559e-06	30.1728	59.6563	80.3636	257.405	206.635	163.787	up	Similar to ORC4: Origin recognition complex subunit 4 (Bos taurus OX%3D9913)
ANN04353	1.129	0.00208591	57.8857	48.4125	77.1855	139.033	118.27	140.975	up	Similar to RTase: Probable RNA-directed DNA polymerase from transposon BS (Drosophila melanogaster OX%3D7227)		ANN04321	1.03044	0.000115616	155.334	110.428	115.431	258.998	252.256	269.718	up	Similar to RpII215: DNA-directed RNA polymerase II subunit RPB1 (Drosophila melanogaster OX%3D7227)
ANN04354	5.11416	1.94828e-17	3.85905	2.06011	6.17484	148.963	139.532	108.567	up	Protein of unknown function		ANN04322	1.07153	2.4201e-09	373.249	378.246	414.969	838.358	782.934	828.711	up	Similar to RpII215: DNA-directed RNA polymerase II subunit RPB1 (Drosophila melanogaster OX%3D7227)
ANN04355	1.1611	6.59707e-06	354.068	287.385	334.985	847.436	723.572	613.321	up	Similar to crn: Protein crooked neck (Drosophila melanogaster OX%3D7227)		ANN04324	2.32889	9.9124e-09	16.7627	44.4249	33.6066	133.085	179.8	159.712	up	Similar to zc2hc1a: Zinc finger C2HC domain-containing protein 1A (Xenopus laevis OX%3D8355)
ANN04357	4.03647	3.25711e-07	1.92952	6.18032	0	45.2407	48.5039	50.2324	up	Protein of unknown function		ANN04333	1.26359	0.0464673	17.8802	41.8863	64.2909	66.9412	173.762	54.5955	up	Similar to lgrD: Linear gramicidin synthase subunit D (Brevibacillus parabrevis OX%3D54914)
ANN04372	1.25359	0.000234607	102.265	73.1338	60.2047	205.239	181.391	179.864	up	Similar to uxs1: UDP-glucuronic acid decarboxylase 1 (Danio rerio OX%3D7955)		ANN04353	2.20585	1.00692e-08	26.8203	22.8471	26.3008	133.085	106.001	111.636	up	Similar to RTase: Probable RNA-directed DNA polymerase from transposon BS (Drosophila melanogaster OX%3D7227)
ANN04392	2.95976	5.95892e-21	72.3571	130.817	149.74	1084.67	825.231	819.112	up	Similar to AAEL009382: Bifunctional lysine-specific demethylase and histidyl-hydroxylase NO66 (Aedes aegypti OX%3D7159)		ANN04354	4.37191	2.79447e-12	4.47004	0	11.6893	118.741	91.9125	110.821	up	Protein of unknown function
ANN04395	2.07826	1.61924e-15	117.701	108.156	123.497	542.889	507.63	422.924	up	Similar to Nup58: Nucleoporin p58/p45 (Mus musculus OX%3D10090)		ANN04355	1.6059	1.20989e-07	126.279	167.545	160.727	638.332	326.055	418.023	up	Similar to crn: Protein crooked neck (Drosophila melanogaster OX%3D7227)
ANN04396	1.46044	9.94169e-06	60.78	92.7048	100.341	237.238	200.66	256.833	up	Similar to Cfap20: Cilia- and flagella-associated protein 20 (Mus musculus OX%3D10090)		ANN04357	4.23603	4.73201e-12	0	10.1543	7.30579	99.6148	116.065	101.857	up	Protein of unknown function
ANN04414	2.8294	5.06836e-20	62.7095	73.1338	67.9233	636.681	399.991	413.202	up	Similar to Phf19: PHD finger protein 19 (Mus musculus OX%3D10090)		ANN04359	1.2847	0.00894113	43.5829	26.6549	35.0678	126.71	63.0641	67.6333	up	Similar to mariner\T: Mariner Mos1 transposase (Drosophila mauritiana OX%3D7226)
ANN04421	3.12495	3.7385e-22	66.5686	59.7431	89.5352	841.919	487.032	542.023	up	Similar to cracr2b: EF-hand calcium-binding domain-containing protein 4A (Danio rerio OX%3D7955)		ANN04376	1.06022	0.00207978	77.1083	79.9648	115.431	142.648	234.813	188.232	up	Similar to Rbm22: Pre-mRNA-splicing factor RBM22 (Mus musculus OX%3D10090)
ANN04439	1.94024	6.4448e-09	92.6171	94.7649	132.759	338.754	325.574	557.417	up	Similar to Phf19: PHD finger protein 19 (Mus musculus OX%3D10090)		ANN04392	2.72203	4.51334e-38	121.809	100.273	118.354	682.162	782.263	782.264	up	Similar to AAEL009382: Bifunctional lysine-specific demethylase and histidyl-hydroxylase NO66 (Aedes aegypti OX%3D7159)
ANN04458	1.99872	3.47797e-08	92.6171	62.8333	40.1365	294.617	272.419	224.425	up	Similar to Foxn4: Forkhead box protein N4 (Mus musculus OX%3D10090)		ANN04394	1.0406	0.00130793	67.0507	67.272	58.4463	125.913	128.812	142.6	up	Similar to Ahi1: Jouberin (Mus musculus OX%3D10090)
ANN04462	1.88849	0.00568933	9.64762	6.18032	9.26226	27.5858	29.8997	34.8386	up	Similar to Pold1: DNA polymerase delta catalytic subunit (Rattus norvegicus OX%3D10116)		ANN04395	1.67402	1.84401e-08	125.161	220.855	111.048	521.982	521.956	415.578	up	Similar to Nup58: Nucleoporin p58/p45 (Mus musculus OX%3D10090)
ANN04463	1.60972	0.00052546	63.6743	58.713	23.1557	109.24	135.545	204.98	up	Similar to DNApol-delta: DNA polymerase delta catalytic subunit (Drosophila melanogaster OX%3D7227)		ANN04396	1.31126	9.04526e-06	74.8732	109.158	71.5967	216.762	208.648	209.419	up	Similar to Cfap20: Cilia- and flagella-associated protein 20 (Mus musculus OX%3D10090)
ANN04470	2.67317	0.00261554	7.7181	1.03005	3.08742	28.6893	21.262	27.5468	up	Similar to ndl: Serine protease nudel (Drosophila melanogaster OX%3D7227)		ANN04414	1.96243	4.24923e-15	89.4009	81.2341	78.9025	317.97	357.587	298.238	up	Similar to Phf19: PHD finger protein 19 (Mus musculus OX%3D10090)
ANN04472	2.04354	0.0456774	5.78857	2.06011	3.08742	17.6549	11.2954	17.0142	up	Protein of unknown function		ANN04418	1.23039	0.00135755	80.4608	95.1962	116.893	326.737	136.192	222.456	up	Similar to KANSL2: KAT8 regulatory NSL complex subunit 2 (Pongo abelii OX%3D9601)
ANN04477	2.44212	1.66643e-12	43.4143	40.1721	26.2431	214.066	178.069	213.893	up	Similar to Nme7: Nucleoside diphosphate kinase 7 (Rattus norvegicus OX%3D10116)		ANN04421	2.66819	1.82589e-18	84.9308	92.6576	64.2909	669.412	348.194	524.769	up	Similar to cracr2b: EF-hand calcium-binding domain-containing protein 4A (Danio rerio OX%3D7955)
ANN04478	1.34745	1.46793e-06	118.666	125.667	151.284	294.617	331.554	375.933	up	Similar to Hr39: Nuclear hormone receptor FTZ-F1 beta (Drosophila melanogaster OX%3D7227)		ANN04432	1.61326	3.4777e-12	155.334	142.16	119.815	456.634	383.081	440.839	up	Similar to EFTUD2: 116 kDa U5 small nuclear ribonucleoprotein component (Gallus gallus OX%3D9031)
ANN04481	1.04072	0.000396026	119.63	139.057	121.953	219.583	273.748	289.241	up	Similar to DHX36: ATP-dependent DNA/RNA helicase DHX36 (Bos taurus OX%3D9913)		ANN04439	2.15573	4.59225e-11	78.2258	85.0419	65.7521	460.619	224.079	338.166	up	Similar to Phf19: PHD finger protein 19 (Mus musculus OX%3D10090)
ANN04485	3.35363	4.64138e-32	45.3438	72.1037	61.7484	558.337	607.296	660.313	up	Similar to CTH: Cystathionine gamma-lyase (Sus scrofa OX%3D9823)		ANN04458	2.1208	7.09768e-07	27.9378	88.8498	35.0678	255.811	220.053	184.158	up	Similar to Foxn4: Forkhead box protein N4 (Mus musculus OX%3D10090)
ANN04491	1.66483	0.00263652	15.4362	16.4809	10.806	45.2407	41.8595	50.2324	up	Similar to Slob: Slowpoke-binding protein (Drosophila melanogaster OX%3D7227)		ANN04463	1.4985	1.65487e-05	64.8156	69.8105	135.888	239.076	295.194	224.901	up	Similar to DNApol-delta: DNA polymerase delta catalytic subunit (Drosophila melanogaster OX%3D7227)
ANN04492	1.76109	0.00462015	12.5419	18.541	7.71855	58.4819	45.1817	30.7876	up	Protein of unknown function		ANN04477	2.73659	1.02231e-11	21.2327	35.5399	17.5339	211.183	137.533	148.304	up	Similar to Nme7: Nucleoside diphosphate kinase 7 (Rattus norvegicus OX%3D10116)
ANN04499	3.46835	1.14855e-15	9.64762	40.1721	35.5053	339.857	323.581	268.176	up	Similar to CTH: Cystathionine gamma-lyase (Sus scrofa OX%3D9823)		ANN04478	1.15214	4.34e-05	136.336	162.468	131.504	408.022	286.472	262.385	up	Similar to Hr39: Nuclear hormone receptor FTZ-F1 beta (Drosophila melanogaster OX%3D7227)
ANN04500	3.56489	3.33121e-16	13.5067	11.3306	9.26226	120.274	143.518	145.836	up	Similar to CTH: Cystathionine gamma-lyase (Bos taurus OX%3D9913)		ANN04479	2.16391	0.00367821	11.1751	13.9621	1.46116	45.4244	44.9499	30.9646	up	Protein of unknown function
ANN04506	1.86732	2.14945e-06	46.3086	37.0819	24.6994	154.481	134.216	111.808	up	Similar to MED4: Mediator of RNA polymerase II transcription subunit 4 (Aedes aegypti OX%3D7159)		ANN04481	1.30572	4.42586e-06	191.094	101.543	154.883	348.253	402.537	356.908	up	Similar to DHX36: ATP-dependent DNA/RNA helicase DHX36 (Bos taurus OX%3D9913)
ANN04520	1.19718	0.00082678	105.159	85.4944	89.5352	144.55	268.433	228.476	up	Similar to BOLL: Protein boule-like (Homo sapiens OX%3D9606)		ANN04485	4.61521	5.6121e-32	30.1728	19.0392	14.6116	769.823	334.776	482.396	up	Similar to CTH: Cystathionine gamma-lyase (Sus scrofa OX%3D9823)
ANN04524	2.1903	6.15726e-05	13.5067	23.6912	12.3497	66.206	50.4972	111.808	up	Similar to Acads: Short-chain specific acyl-CoA dehydrogenase%2C mitochondrial (Rattus norvegicus OX%3D10116)		ANN04492	1.83554	0.0232372	11.1751	10.1543	4.38347	47.8151	16.7724	28.5201	up	Protein of unknown function
ANN04526	2.18597	2.54749e-13	62.7095	57.683	57.1173	294.617	231.889	283.57	up	Protein of unknown function		ANN04499	4.04287	1.91724e-28	42.4654	27.9242	24.8397	321.955	735.971	524.769	up	Similar to CTH: Cystathionine gamma-lyase (Sus scrofa OX%3D9823)
ANN04527	2.48392	7.52578e-16	75.2514	116.396	74.0981	549.51	395.34	548.505	up	Similar to GTF3A: Transcription factor IIIA (Homo sapiens OX%3D9606)		ANN04500	4.22463	3.64134e-05	1.11751	2.53856	2.92231	74.9103	16.1015	29.3349	up	Similar to CTH: Cystathionine gamma-lyase (Bos taurus OX%3D9913)
ANN04529	1.25887	5.67099e-07	194.882	182.319	200.682	455.718	415.938	510.426	up	Similar to ANKRD6: Ankyrin repeat domain-containing protein 6 (Homo sapiens OX%3D9606)		ANN04506	1.29819	0.00206468	92.7534	73.6184	42.3736	128.304	246.218	140.971	up	Similar to MED4: Mediator of RNA polymerase II transcription subunit 4 (Aedes aegypti OX%3D7159)
ANN04536	2.98654	0.0124792	2.89429	2.06011	0	16.5515	13.2887	12.9632	up	Protein of unknown function		ANN04513	1.16998	0.00752846	111.751	107.889	162.188	450.259	133.508	274.607	up	Similar to LSM12: Protein LSM12 homolog (Gallus gallus OX%3D9031)
ANN04566	2.41358	2.11594e-16	69.4629	54.5928	50.9424	311.168	294.346	332.992	up	Similar to ncapd2: Condensin complex subunit 1 (Xenopus laevis OX%3D8355)		ANN04520	1.48915	8.52712e-07	53.6405	67.272	81.8248	192.854	185.838	187.418	up	Similar to BOLL: Protein boule-like (Homo sapiens OX%3D9606)
ANN04573	2.03971	1.50145e-11	203.565	242.063	387.471	1337.36	1031.87	1042.73	up	Similar to Pnliprp2: Pancreatic lipase-related protein 2 (Rattus norvegicus OX%3D10116)		ANN04524	2.41637	5.2088e-06	13.4101	13.9621	20.4562	50.2059	118.077	84.7453	up	Similar to Acads: Short-chain specific acyl-CoA dehydrogenase%2C mitochondrial (Rattus norvegicus OX%3D10116)
ANN04574	1.37905	1.36005e-09	261.45	251.333	285.586	678.611	702.975	691.91	up	Protein of unknown function		ANN04526	1.49479	1.19749e-05	74.8732	102.812	46.757	196.042	201.939	237.124	up	Protein of unknown function
ANN04581	1.11131	0.000129454	129.278	189.53	145.109	365.236	309.628	328.941	up	Similar to Protein Asterix (Manduca sexta OX%3D7130)		ANN04527	1.6315	5.63344e-11	93.8709	118.043	140.271	354.629	375.701	356.093	up	Similar to GTF3A: Transcription factor IIIA (Homo sapiens OX%3D9606)
ANN04594	4.88733	2.05723e-58	30.8724	26.7814	43.2239	802.196	1045.82	1084.05	up	Similar to ndl: Serine protease nudel (Drosophila melanogaster OX%3D7227)		ANN04536	4.49664	1.21143e-05	2.23502	0	4.38347	16.7353	89.8999	38.2984	up	Protein of unknown function
ANN04601	2.9585	1.10826e-25	217.071	293.565	248.537	2554.45	1449.14	1899.92	up	Similar to LSM7: U6 snRNA-associated Sm-like protein LSm7 (Homo sapiens OX%3D9606)		ANN04566	2.21353	1.87973e-07	24.5852	45.6942	99.3587	256.608	253.598	268.089	up	Similar to ncapd2: Condensin complex subunit 1 (Xenopus laevis OX%3D8355)
ANN04602	1.6805	3.32348e-08	82.9695	85.4944	67.9233	210.756	277.07	272.227	up	Similar to TMEM205: Transmembrane protein 205 (Homo sapiens OX%3D9606)		ANN04573	2.99336	9.0764e-36	91.6359	129.467	92.0529	981.804	738.655	774.116	up	Similar to Pnliprp2: Pancreatic lipase-related protein 2 (Rattus norvegicus OX%3D10116)
ANN04613	2.1735	2.33164e-10	47.2733	66.9535	46.3113	242.755	190.029	294.913	up	Similar to otsA: Trehalose-6-phosphate synthase (Mycolicibacterium smegmatis (strain ATCC 700084 / mc(2)155) OX%3D246196)		ANN04590	1.30293	0.0173967	31.2903	40.617	23.3785	105.99	38.9119	91.2642	up	Similar to Slc30a2: Zinc transporter 2 (Mus musculus OX%3D10090)
ANN04614	1.72585	6.55563e-06	59.8152	128.757	163.633	435.856	321.588	400.239	up	Similar to tpsA: Alpha%2Calpha-trehalose-phosphate synthase [UDP-forming] A (Dictyostelium discoideum OX%3D44689)		ANN04594	8.07306	4.85769e-64	2.23502	7.61569	5.84463	1100.54	1386.74	1625.64	up	Similar to ndl: Serine protease nudel (Drosophila melanogaster OX%3D7227)
ANN04616	2.9204	0.000241591	3.85905	4.12021	6.17484	16.5515	48.5039	38.8896	up	Protein of unknown function		ANN04601	2.888	1.74472e-52	185.507	211.97	214.79	1546.02	1329.71	1650.9	up	Similar to LSM7: U6 snRNA-associated Sm-like protein LSm7 (Homo sapiens OX%3D9606)
ANN04623	1.02933	0.000329121	129.278	170.989	137.39	269.238	300.99	323.27	up	Similar to Syb: Synaptobrevin (Drosophila melanogaster OX%3D7227)		ANN04602	2.02665	8.02156e-09	88.2834	57.1177	35.0678	278.921	225.421	237.939	up	Similar to TMEM205: Transmembrane protein 205 (Homo sapiens OX%3D9606)
ANN04630	1.5723	0.012732	10.6124	15.4508	12.3497	26.4824	49.8328	37.2692	up	Protein of unknown function		ANN04613	2.78585	9.90222e-16	40.2304	33.0013	32.1455	321.158	223.408	184.973	up	Similar to otsA: Trehalose-6-phosphate synthase (Mycolicibacterium smegmatis (strain ATCC 700084 / mc(2)155) OX%3D246196)
ANN04639	1.64539	5.57099e-07	49.2029	54.5928	49.3987	172.136	146.176	162.04	up	Similar to wdr75: WD repeat-containing protein 75 (Xenopus laevis OX%3D8355)		ANN04614	2.41578	2.05571e-15	75.9907	92.6576	71.5967	582.547	314.65	386.243	up	Similar to tpsA: Alpha%2Calpha-trehalose-phosphate synthase [UDP-forming] A (Dictyostelium discoideum OX%3D44689)
ANN04641	1.82228	2.76303e-07	77.181	156.568	169.808	588.13	415.273	418.063	up	Similar to tpsA: Alpha%2Calpha-trehalose-phosphate synthase [UDP-forming] A (Dictyostelium discoideum OX%3D44689)		ANN04616	2.014	0.000293392	8.94009	17.77	14.6116	47.0182	54.3425	64.3738	up	Protein of unknown function
ANN04653	1.36568	6.02896e-05	63.6743	54.5928	89.5352	163.308	186.042	180.674	up	Similar to NOA1: Nitric oxide-associated protein 1 (Homo sapiens OX%3D9606)		ANN04617	1.82581	3.89379e-09	88.2834	54.5791	62.8298	204.011	281.776	246.087	up	Similar to Pol: LINE-1 retrotransposable element ORF2 protein (Mus musculus OX%3D10090)
ANN04654	1.13606	0.00160896	107.089	84.4644	174.439	227.307	281.721	288.431	up	Similar to DDX27: Probable ATP-dependent RNA helicase DDX27 (Homo sapiens OX%3D9606)		ANN04623	1.76159	7.48607e-10	72.6382	90.119	112.509	365.786	258.965	304.757	up	Similar to Syb: Synaptobrevin (Drosophila melanogaster OX%3D7227)
ANN04661	3.35598	1.26871e-15	60.78	19.571	21.6119	307.858	381.387	371.882	up	Similar to nek8: Serine/threonine-protein kinase Nek8 (Danio rerio OX%3D7955)		ANN04639	1.88054	1.20352e-06	40.2304	60.9256	23.3785	156.993	150.951	153.193	up	Similar to wdr75: WD repeat-containing protein 75 (Xenopus laevis OX%3D8355)
ANN04663	2.13794	2.42249e-17	203.565	170.989	239.275	1000.81	792.009	901.752	up	Similar to Snrpa1: U2 small nuclear ribonucleoprotein A' (Mus musculus OX%3D10090)		ANN04641	2.24854	9.89694e-10	41.3479	91.3883	73.0579	443.884	303.915	226.531	up	Similar to tpsA: Alpha%2Calpha-trehalose-phosphate synthase [UDP-forming] A (Dictyostelium discoideum OX%3D44689)
ANN04664	1.8131	8.73814e-11	7032.15	9993.58	9708.39	40176	23095.8	30669.3	up	Similar to RpS26: 40S ribosomal protein S26 (Drosophila melanogaster OX%3D7227)		ANN04652	1.04097	4.78053e-06	255.91	299.551	295.154	678.178	479.019	592.402	up	Similar to AATF: Protein AATF (Gallus gallus OX%3D9031)
ANN04670	1.79388	4.39864e-09	65.6038	83.4343	86.4478	302.341	225.244	286.811	up	Protein of unknown function		ANN04653	1.48512	3.3449e-07	70.4032	82.5034	64.2909	221.543	208.648	178.454	up	Similar to NOA1: Nitric oxide-associated protein 1 (Homo sapiens OX%3D9606)
ANN04675	2.41898	7.28578e-10	31.8371	88.5846	57.1173	385.098	266.439	298.153	up	Similar to Lsm3: U6 snRNA-associated Sm-like protein LSm3 (Mus musculus OX%3D10090)		ANN04654	1.34947	3.38906e-07	115.104	163.737	149.038	364.192	302.573	422.097	up	Similar to DDX27: Probable ATP-dependent RNA helicase DDX27 (Homo sapiens OX%3D9606)
ANN04676	1.61269	3.59753e-08	83.9343	118.456	109.603	297.927	360.125	293.292	up	Similar to DDX27: Probable ATP-dependent RNA helicase DDX27 (Bos taurus OX%3D9913)		ANN04661	3.77721	1.99012e-28	21.2327	36.8092	16.0727	286.094	379.726	355.278	up	Similar to nek8: Serine/threonine-protein kinase Nek8 (Danio rerio OX%3D7955)
ANN04686	2.17979	6.4267e-12	4621.21	6295.69	7825.07	38313.4	18761.7	27834.4	up	Similar to RpL37A: 60S ribosomal protein L37a (Drosophila melanogaster OX%3D7227)		ANN04663	2.01485	5.44157e-26	230.207	204.354	185.567	838.358	837.947	835.23	up	Similar to Snrpa1: U2 small nuclear ribonucleoprotein A' (Mus musculus OX%3D10090)
ANN04687	1.14467	0.000532897	83.9343	67.9835	78.7292	150.067	160.794	198.499	up	Similar to armi: Probable RNA helicase armi (Drosophila melanogaster OX%3D7227)		ANN04664	1.1852	1.09289e-15	10436.4	9924.52	10143.4	23666.9	20933.2	24766.8	up	Similar to RpS26: 40S ribosomal protein S26 (Drosophila melanogaster OX%3D7227)
ANN04688	1.22155	0.00677176	95.5114	80.3442	43.2239	113.654	244.513	155.558	up	Similar to armi: Probable RNA helicase armi (Drosophila melanogaster OX%3D7227)		ANN04670	1.81383	3.43536e-06	102.811	49.502	36.5289	196.839	234.142	238.754	up	Protein of unknown function
ANN04702	2.47205	1.19793e-11	88.7581	125.667	55.5736	431.442	679.719	396.998	up	Similar to bms1: Ribosome biogenesis protein bms1 (Schizosaccharomyces pombe (strain 972 / ATCC 24843) OX%3D284812)		ANN04674	1.4914	0.0489199	41.3479	15.2314	13.1504	124.319	24.8231	48.8915	up	Similar to ADRM1: Proteasomal ubiquitin receptor ADRM1 (Bos taurus OX%3D9913)
ANN04726	2.86871	3.58203e-07	5.78857	10.3005	9.26226	71.7231	58.4705	53.4732	up	Protein of unknown function		ANN04675	2.49055	2.44281e-12	42.4654	31.7321	49.6793	313.189	181.812	199.64	up	Similar to Lsm3: U6 snRNA-associated Sm-like protein LSm3 (Mus musculus OX%3D10090)
ANN04727	2.44653	1.82658e-21	93.5819	131.847	117.322	607.992	613.276	644.109	up	Similar to UTP14A: U3 small nucleolar RNA-associated protein 14 homolog A (Bos taurus OX%3D9913)		ANN04676	1.47248	1.53943e-09	124.044	112.966	103.742	343.472	289.826	314.536	up	Similar to DDX27: Probable ATP-dependent RNA helicase DDX27 (Bos taurus OX%3D9913)
ANN04746	4.09262	0.00233842	1.92952	1.03005	0	27.5858	22.5909	5.6714	up	Similar to APOD: Apolipoprotein D (Macaca fascicularis OX%3D9541)		ANN04677	1.05951	0.00756647	67.0507	50.7713	42.3736	141.055	95.267	99.4128	up	Similar to Aatf: Protein Aatf (Drosophila melanogaster OX%3D7227)
ANN04748	3.30646	8.19869e-30	151.468	100.945	123.497	926.884	1544.15	1249.33	up	Similar to Gemin5: Gem-associated protein 5 (Mus musculus OX%3D10090)		ANN04686	1.35052	9.95587e-20	8079.6	7825.13	7336.47	20910.3	17978.6	20380.4	up	Similar to RpL37A: 60S ribosomal protein L37a (Drosophila melanogaster OX%3D7227)
ANN04752	1.20397	6.33076e-06	240.226	286.355	192.964	591.44	559.456	512.046	up	Similar to Cnot6: CCR4-NOT transcription complex subunit 6 (Rattus norvegicus OX%3D10116)		ANN04687	1.36744	8.24771e-05	48.053	58.387	86.2083	189.667	146.255	158.083	up	Similar to armi: Probable RNA helicase armi (Drosophila melanogaster OX%3D7227)
ANN04754	1.27852	0.00054117	121.56	88.5846	54.0299	194.204	220.593	231.717	up	Similar to CNOT6: CCR4-NOT transcription complex subunit 6 (Homo sapiens OX%3D9606)		ANN04688	1.52943	1.44406e-07	61.4631	66.0027	83.286	186.479	210.661	208.604	up	Similar to armi: Probable RNA helicase armi (Drosophila melanogaster OX%3D7227)
ANN04768	1.71594	1.63643e-11	156.291	131.847	123.497	464.545	438.529	453.712	up	Protein of unknown function		ANN04702	2.49176	1.65265e-31	121.809	101.543	122.737	616.815	699.072	629.886	up	Similar to bms1: Ribosome biogenesis protein bms1 (Schizosaccharomyces pombe (strain 972 / ATCC 24843) OX%3D284812)
ANN04769	2.39616	1.19256e-06	26.0486	13.3907	49.3987	157.791	103.652	196.068	up	Similar to Bora: Protein aurora borealis (Rattus norvegicus OX%3D10116)		ANN04726	3.97013	4.22922e-10	4.47004	3.80785	5.84463	87.661	61.7223	70.0779	up	Protein of unknown function
ANN04778	1.75817	3.61883e-15	1540.72	1347.31	1397.06	4098.15	5587.25	4809.34	up	Similar to pabpc1a: Polyadenylate-binding protein 1A (Danio rerio OX%3D7955)		ANN04727	2.42548	7.95871e-26	103.929	91.3883	130.043	634.347	566.906	541.066	up	Similar to UTP14A: U3 small nucleolar RNA-associated protein 14 homolog A (Bos taurus OX%3D9913)
ANN04779	2.08575	5.15756e-11	88.7581	89.6146	63.2921	257.1	387.367	386.465	up	Similar to tc3a: Transposable element Tc3 transposase (Caenorhabditis elegans OX%3D6239)		ANN04745	1.83206	8.91254e-06	31.2903	27.9242	23.3785	97.2241	81.1782	117.34	up	Protein of unknown function
ANN04782	1.5006	2.05251e-09	1753.94	2746.12	2576.45	7213.14	6270.29	6536.69	up	Similar to EEF1D: Elongation factor 1-delta (Macaca fascicularis OX%3D9541)		ANN04748	3.73519	5.4701e-75	79.3433	105.35	106.664	1312.52	1263.97	1285.85	up	Similar to Gemin5: Gem-associated protein 5 (Mus musculus OX%3D10090)
ANN04803	1.01206	0.0148338	65.6038	44.2923	74.0981	159.998	97.0078	113.428	up	Similar to Zfp26: Zinc finger protein 26 (Mus musculus OX%3D10090)		ANN04752	1.12147	3.96058e-07	201.152	190.392	238.169	499.668	445.474	422.912	up	Similar to Cnot6: CCR4-NOT transcription complex subunit 6 (Rattus norvegicus OX%3D10116)
ANN04829	1.46436	0.0150332	13.5067	25.7513	10.806	34.2064	51.8261	53.4732	up	Similar to Asap: ArfGAP with SH3 domain%2C ANK repeat and PH domain-containing protein (Drosophila melanogaster OX%3D7227)		ANN04754	1.66492	9.59315e-08	51.4055	63.4641	62.8298	221.543	162.356	178.454	up	Similar to CNOT6: CCR4-NOT transcription complex subunit 6 (Homo sapiens OX%3D9606)
ANN04838	3.1429	0.000285173	3.85905	2.06011	3.08742	26.4824	31.2285	21.8754	up	Similar to pol: RNA-directed DNA polymerase from mobile element jockey (Drosophila melanogaster OX%3D7227)		ANN04768	1.2727	2.77158e-08	141.924	159.93	162.188	376.942	337.46	405.8	up	Protein of unknown function
ANN04844	1.52126	8.223e-07	69.4629	104.035	78.7292	258.203	234.546	232.527	up	Similar to MED4: Mediator of RNA polymerase II transcription subunit 4 (Aedes aegypti OX%3D7159)		ANN04769	1.71557	2.21814e-05	25.7028	58.387	36.5289	111.569	141.559	141.785	up	Similar to Bora: Protein aurora borealis (Rattus norvegicus OX%3D10116)
ANN04860	3.40271	0.000594915	0	2.06011	6.17484	29.7927	21.262	26.7366	up	Similar to NCAPD2: Condensin complex subunit 1 (Homo sapiens OX%3D9606)		ANN04778	1.36506	1.08164e-18	2317.72	1939.46	2050	5206.27	5397.35	5646.16	up	Similar to pabpc1a: Polyadenylate-binding protein 1A (Danio rerio OX%3D7955)
ANN04867	4.97983	0.00031922	0	0	3.08742	33.103	9.96656	34.0284	up	Protein of unknown function		ANN04779	1.68275	3.47509e-08	106.164	85.0419	65.7521	325.94	217.37	286.015	up	Similar to tc3a: Transposable element Tc3 transposase (Caenorhabditis elegans OX%3D6239)
ANN04868	4.15883	4.25356e-08	3.85905	2.06011	3.08742	54.0682	70.4303	36.459	up	Protein of unknown function		ANN04782	1.27546	1.47946e-18	2554.63	2343.1	2301.32	5675.65	6004.51	5749.64	up	Similar to EEF1D: Elongation factor 1-delta (Macaca fascicularis OX%3D9541)
ANN04869	4.48842	0.00152939	0	0	3.08742	23.1721	17.9398	13.7734	up	Protein of unknown function		ANN04809	1.97142	0.0424989	8.94009	7.61569	2.92231	8.7661	45.6208	22.816	up	Similar to Trypsin-1 (Astacus astacus OX%3D6715)
ANN04899	3.31171	0.0373457	0	3.09016	0	8.82746	17.9398	5.6714	up	Similar to Prdm9: Histone-lysine N-methyltransferase PRDM9 (Mus musculus OX%3D10090)		ANN04821	1.41798	0.000532227	48.053	92.6576	51.1405	141.055	238.168	132.822	up	Similar to mttp: Microsomal triglyceride transfer protein large subunit (Danio rerio OX%3D7955)
ANN04901	4.87547	0.0229483	0	0	0	3.3103	11.9599	3.2408	up	Similar to R1A1-element\ORF2: Putative 115 kDa protein in type-1 retrotransposable element R1DM (Drosophila melanogaster OX%3D7227)		ANN04838	3.75542	0.00401778	0	0	5.84463	11.1569	45.6208	16.2972	up	Similar to pol: RNA-directed DNA polymerase from mobile element jockey (Drosophila melanogaster OX%3D7227)
ANN04903	5.30498	0.000956487	0	0	1.54371	12.1378	25.2486	11.3428	up	Protein of unknown function		ANN04844	2.55751	6.06275e-06	12.2926	21.5778	29.2231	217.559	69.1021	81.4859	up	Similar to MED4: Mediator of RNA polymerase II transcription subunit 4 (Aedes aegypti OX%3D7159)
ANN04904	7.98057	4.84842e-09	0	0	0	66.206	59.1349	35.6488	up	Protein of unknown function		ANN04860	3.59564	0.000122731	3.35253	1.26928	2.92231	21.5168	30.1903	39.9281	up	Similar to NCAPD2: Condensin complex subunit 1 (Homo sapiens OX%3D9606)
ANN04947	2.66091	2.05251e-09	38.5905	36.0519	15.4371	260.41	198.002	123.15	up	Protein of unknown function		ANN04867	5.96289	0.00152675	0	0	0	23.9076	1.34179	18.7418	up	Protein of unknown function
ANN04987	1.74229	0.0218321	16.401	12.3606	3.08742	25.379	56.4772	27.5468	up	Similar to Cbr1: Carbonyl reductase [NADPH] 1 (Mus musculus OX%3D10090)		ANN04868	8.3414	2.86057e-10	0	0	0	84.4734	58.3678	85.5602	up	Protein of unknown function
ANN05010	1.09751	0.0105469	62.7095	61.8032	41.6802	80.5506	120.263	156.369	up	Similar to ZNF782: Zinc finger protein 782 (Homo sapiens OX%3D9606)		ANN04869	5.35804	4.16434e-07	2.23502	0	1.46116	44.6274	38.9119	71.7076	up	Protein of unknown function
ANN05014	2.40954	7.57388e-09	43.4143	24.7213	16.9808	174.342	151.492	136.114	up	Similar to LRR1: Leucine-rich repeat protein 1 (Homo sapiens OX%3D9606)		ANN04899	6.72467	6.38644e-06	0	0	0	23.1106	22.8104	28.5201	up	Similar to Prdm9: Histone-lysine N-methyltransferase PRDM9 (Mus musculus OX%3D10090)
ANN05015	1.21909	3.4722e-05	112.877	173.049	132.759	342.064	333.547	299.774	up	Similar to Wee1: Wee1-like protein kinase (Rattus norvegicus OX%3D10116)		ANN04900	6.98357	1.51894e-06	0	0	0	35.0644	29.5194	24.4458	up	Protein of unknown function
ANN05020	1.51071	5.30073e-06	134.102	87.5545	128.128	431.442	269.762	295.723	up	Similar to gatad1: GATA zinc finger domain-containing protein 1 (Xenopus laevis OX%3D8355)		ANN04901	3.96963	0.0117362	0	0	2.92231	11.1569	18.1142	12.2229	up	Similar to R1A1-element\ORF2: Putative 115 kDa protein in type-1 retrotransposable element R1DM (Drosophila melanogaster OX%3D7227)
ANN05024	5.60065	0.00189311	0	0	0	4.41373	13.2887	12.9632	up	Protein of unknown function		ANN04903	5.93314	0.000758661	0	0	0	26.2983	5.36716	11.408	up	Protein of unknown function
ANN05032	1.01894	0.0165651	61.7448	61.8032	55.5736	87.1712	172.089	102.895	up	Similar to PLEKHG1: Pleckstrin homology domain-containing family G member 1 (Homo sapiens OX%3D9606)		ANN04904	7.33231	2.3661e-07	0	0	0	27.8921	34.2156	51.3361	up	Protein of unknown function
ANN05045	1.10869	0.000147891	126.384	141.117	132.759	231.721	315.608	314.357	up	Similar to Sep1: Septin-1 (Drosophila melanogaster OX%3D7227)		ANN04947	2.35741	4.87602e-06	32.4078	41.8863	8.76694	207.199	108.685	114.08	up	Protein of unknown function
ANN05052	2.083	5.48387e-13	85.8638	107.126	115.778	517.51	360.125	426.975	up	Similar to kti12: Protein KTI12 homolog (Danio rerio OX%3D7955)		ANN04987	2.9285	0.000988127	6.70507	5.07713	0	24.7045	38.241	30.1498	up	Similar to Cbr1: Carbonyl reductase [NADPH] 1 (Mus musculus OX%3D10090)
ANN05061	4.65703	0.0393369	0	0	0	9.9309	4.65106	1.6204	up	Similar to ZBED9: SCAN domain-containing protein 3 (Homo sapiens OX%3D9606)		ANN05014	2.31089	1.90298e-10	26.8203	29.1935	35.0678	148.227	176.445	124.673	up	Similar to LRR1: Leucine-rich repeat protein 1 (Homo sapiens OX%3D9606)
ANN05079	1.12126	0.000148678	102.265	96.825	115.778	255.996	213.949	213.893	up	Similar to RTase: Probable RNA-directed DNA polymerase from transposon BS (Drosophila melanogaster OX%3D7227)		ANN05020	1.41846	5.13725e-06	68.1682	82.5034	62.8298	226.325	160.344	184.973	up	Similar to gatad1: GATA zinc finger domain-containing protein 1 (Xenopus laevis OX%3D8355)
ANN05081	4.48035	5.93016e-06	1.92952	0	3.08742	33.103	35.8796	34.0284	up	Protein of unknown function		ANN05024	5.33828	0.00693015	0	0	0	9.56302	2.68358	16.2972	up	Protein of unknown function
ANN05086	1.07208	0.000425828	114.807	121.546	114.235	195.308	275.741	264.935	up	Similar to wdhd1: WD repeat and HMG-box DNA-binding protein 1 (Xenopus laevis OX%3D8355)		ANN05032	1.42788	0.0018305	46.9355	68.5412	20.4562	114.756	142.901	110.006	up	Similar to PLEKHG1: Pleckstrin homology domain-containing family G member 1 (Homo sapiens OX%3D9606)
ANN05090	2.96438	1.98514e-08	21.2248	14.4207	20.0682	253.79	91.0279	90.7423	up	Similar to Venom dipeptidyl peptidase 4 (Apis mellifera OX%3D7460)		ANN05045	1.64097	2.52718e-07	111.751	58.387	75.9802	240.669	232.8	297.423	up	Similar to Sep1: Septin-1 (Drosophila melanogaster OX%3D7227)
ANN05144	2.69306	7.24049e-06	3.85905	12.3606	13.8934	58.4819	81.0613	49.4222	up	Similar to Orc1: Origin recognition complex subunit 1 (Drosophila melanogaster OX%3D7227)		ANN05052	1.07448	0.000141149	249.205	168.815	197.256	317.174	483.715	496.249	up	Similar to kti12: Protein KTI12 homolog (Danio rerio OX%3D7955)
ANN05145	1.82984	1.35423e-06	63.6743	100.945	55.5736	360.823	207.304	220.374	up	Similar to CG3527: Ribosomal RNA small subunit methyltransferase NEP1 (Drosophila melanogaster OX%3D7227)		ANN05081	6.57048	8.87559e-05	0	0	0	49.4089	9.39252	8.14859	up	Protein of unknown function
ANN05146	6.36527	0.000114599	0	0	0	35.3099	7.97325	9.72239	up	Similar to Ttpal: Alpha-tocopherol transfer protein-like (Mus musculus OX%3D10090)		ANN05086	1.65871	1.14877e-08	75.9907	93.9269	73.0579	207.996	303.244	255.866	up	Similar to wdhd1: WD repeat and HMG-box DNA-binding protein 1 (Xenopus laevis OX%3D8355)
ANN05147	3.58583	4.49754e-06	2.89429	4.12021	3.08742	51.8613	25.2486	45.3712	up	Similar to RLBP1: Retinaldehyde-binding protein 1 (Gallus gallus OX%3D9031)		ANN05090	2.8488	2.43101e-12	15.6452	22.8471	14.6116	125.913	118.077	139.341	up	Similar to Venom dipeptidyl peptidase 4 (Apis mellifera OX%3D7460)
ANN05154	1.55141	0.0309099	17.3657	26.7814	10.806	103.723	34.5507	25.9264	up	Protein of unknown function		ANN05142	4.39288	0.00297691	0	2.53856	0	13.5476	19.4559	20.3715	up	Similar to Orc1: Origin recognition complex subunit 1 (Drosophila melanogaster OX%3D7227)
ANN05169	2.73578	5.46796e-23	126.384	83.4343	120.409	814.333	759.452	622.233	up	Similar to slc23a2: Solute carrier family 23 member 2 (Xenopus tropicalis OX%3D8364)		ANN05144	2.51005	1.46346e-05	11.1751	27.9242	5.84463	111.569	82.52	63.559	up	Similar to Orc1: Origin recognition complex subunit 1 (Drosophila melanogaster OX%3D7227)
ANN05170	3.44261	5.03641e-11	10.6124	6.18032	35.5053	143.446	198.667	197.689	up	Similar to got2: Aspartate aminotransferase%2C mitochondrial (Xenopus tropicalis OX%3D8364)		ANN05146	5.48235	0.00391913	0	0	0	8.7661	4.02537	18.7418	up	Similar to Ttpal: Alpha-tocopherol transfer protein-like (Mus musculus OX%3D10090)
ANN05171	1.47905	0.00334606	32.8019	22.6612	15.4371	52.9648	78.4036	68.867	up	Similar to Ddx10: Probable ATP-dependent RNA helicase DDX10 (Mus musculus OX%3D10090)		ANN05147	2.58284	0.000608629	6.70507	7.61569	4.38347	52.5966	21.4686	39.1132	up	Similar to RLBP1: Retinaldehyde-binding protein 1 (Gallus gallus OX%3D9031)
ANN05180	2.1556	1.09889e-06	27.0133	14.4207	27.7868	87.1712	98.3367	119.91	up	Similar to slc23a2: Solute carrier family 23 member 2 (Xenopus tropicalis OX%3D8364)		ANN05150	1.59083	0.00347901	13.4101	20.3085	17.5339	44.6274	61.7223	47.2618	up	Similar to TAF5: Transcription initiation factor TFIID subunit 5 (Homo sapiens OX%3D9606)
ANN05182	2.08736	0.00132302	14.4714	7.21037	10.806	69.5163	28.5708	41.3202	up	Similar to Slc23a1: Solute carrier family 23 member 1 (Mus musculus OX%3D10090)		ANN05154	2.54502	0.00722677	5.58755	8.88498	2.92231	35.8613	8.05073	58.6698	up	Protein of unknown function
ANN05183	4.52534	3.86868e-16	7.7181	2.06011	6.17484	121.378	108.968	134.493	up	Similar to got2: Aspartate aminotransferase%2C mitochondrial (Xenopus tropicalis OX%3D8364)		ANN05169	4.05779	1.68083e-23	54.758	25.3856	51.1405	1155.53	371.676	660.85	up	Similar to slc23a2: Solute carrier family 23 member 2 (Xenopus tropicalis OX%3D8364)
ANN05185	1.75398	0.0424186	11.5771	3.09016	4.63113	20.9652	25.9131	19.4448	up	Similar to Ddx10: Probable ATP-dependent RNA helicase DDX10 (Mus musculus OX%3D10090)		ANN05170	4.59342	2.71848e-23	10.0576	2.53856	16.0727	227.919	185.167	266.459	up	Similar to got2: Aspartate aminotransferase%2C mitochondrial (Xenopus tropicalis OX%3D8364)
ANN05186	2.08591	4.10276e-08	38.5905	40.1721	27.7868	191.997	124.25	141.785	up	Similar to got2: Aspartate aminotransferase%2C mitochondrial (Xenopus tropicalis OX%3D8364)		ANN05171	1.80981	0.000368988	33.5253	19.0392	11.6893	86.0672	72.4566	70.0779	up	Similar to Ddx10: Probable ATP-dependent RNA helicase DDX10 (Mus musculus OX%3D10090)
ANN05188	1.97333	8.63488e-06	21.2248	19.571	20.0682	89.3781	67.7726	82.6404	up	Similar to Ddx10: Probable ATP-dependent RNA helicase DDX10 (Mus musculus OX%3D10090)		ANN05180	3.62573	5.34976e-13	7.82258	10.1543	18.995	219.153	104.66	123.859	up	Similar to slc23a2: Solute carrier family 23 member 2 (Xenopus tropicalis OX%3D8364)
ANN05189	3.56792	3.29521e-20	28.9429	17.5109	12.3497	265.927	204.647	246.301	up	Protein of unknown function		ANN05182	2.03867	0.000707138	16.7627	10.1543	8.76694	51.7997	59.7096	36.6686	up	Similar to Slc23a1: Solute carrier family 23 member 1 (Mus musculus OX%3D10090)
ANN05220	1.262	0.00267653	76.2162	33.9918	54.0299	127.998	113.619	153.128	up	Similar to Cpsf4: Cleavage and polyadenylation specificity factor subunit 4 (Rattus norvegicus OX%3D10116)		ANN05183	5.8463	1.90277e-11	1.11751	3.80785	0	78.8949	90.5708	121.414	up	Similar to got2: Aspartate aminotransferase%2C mitochondrial (Xenopus tropicalis OX%3D8364)
ANN05222	2.49913	1.26309e-12	30.8724	28.8415	27.7868	151.17	160.794	183.915	up	Similar to Six4: Homeobox protein SIX4 (Mus musculus OX%3D10090)		ANN05186	2.46314	7.43685e-14	29.0553	34.2706	51.1405	196.042	203.952	224.901	up	Similar to got2: Aspartate aminotransferase%2C mitochondrial (Xenopus tropicalis OX%3D8364)
ANN05224	2.65777	1.01806e-23	137.961	110.216	91.0789	782.334	712.277	660.313	up	Similar to WDR74: WD repeat-containing protein 74 (Bos taurus OX%3D9913)		ANN05188	2.55265	1.85951e-07	22.3502	17.77	11.6893	125.913	64.4059	117.34	up	Similar to Ddx10: Probable ATP-dependent RNA helicase DDX10 (Mus musculus OX%3D10090)
ANN05241	2.04585	6.35724e-11	115.771	82.4043	66.3795	415.994	315.608	370.261	up	Similar to Rfc5: Replication factor C subunit 5 (Mus musculus OX%3D10090)		ANN05189	3.90122	7.43802e-15	5.58755	20.3085	4.38347	137.07	154.977	162.157	up	Protein of unknown function
ANN05245	1.04745	0.000770985	79.1105	110.216	103.429	196.411	201.324	205.791	up	Similar to Zrsr1: U2 small nuclear ribonucleoprotein auxiliary factor 35 kDa subunit-related protein 1 (Mus musculus OX%3D10090)		ANN05191	1.49305	0.0285635	21.2327	22.8471	8.76694	23.1106	58.3678	68.4481	up	Protein of unknown function
ANN05247	1.80267	3.31755e-12	127.349	150.388	177.527	546.199	491.019	544.454	up	Similar to mael: Protein maelstrom homolog (Culex quinquefasciatus OX%3D7176)		ANN05192	1.2394	0.000194245	68.1682	68.5412	68.6744	168.947	193.218	122.229	up	Similar to Thap12: 52 kDa repressor of the inhibitor of the protein kinase (Mus musculus OX%3D10090)
ANN05248	1.92178	1.00421e-10	85.8638	62.8333	67.9233	300.134	260.459	263.315	up	Protein of unknown function		ANN05198	1.47294	0.0011524	257.028	213.239	182.645	213.574	1033.85	565.512	up	Similar to Transferrin (Blaberus discoidalis OX%3D6981)
ANN05253	1.4481	3.73888e-07	157.256	211.161	260.887	631.164	510.952	568.76	up	Similar to Imp3: U3 small nucleolar ribonucleoprotein protein IMP3 (Mus musculus OX%3D10090)		ANN05220	1.54375	0.00064788	51.4055	39.3478	29.2231	168.15	76.482	107.561	up	Similar to Cpsf4: Cleavage and polyadenylation specificity factor subunit 4 (Rattus norvegicus OX%3D10116)
ANN05257	2.39893	4.02269e-26	544.126	600.521	619.028	3593.88	2607.92	3097.39	up	Similar to got2: Aspartate aminotransferase%2C mitochondrial (Xenopus tropicalis OX%3D8364)		ANN05222	4.04487	9.21526e-20	7.82258	15.2314	11.6893	137.07	199.256	232.235	up	Similar to Six4: Homeobox protein SIX4 (Mus musculus OX%3D10090)
ANN05266	4.81053	8.28743e-28	9.64762	21.6311	55.5736	711.714	773.405	857.191	up	Protein of unknown function		ANN05224	1.85616	5.37849e-20	173.214	165.007	185.567	690.131	609.172	595.662	up	Similar to WDR74: WD repeat-containing protein 74 (Bos taurus OX%3D9913)
ANN05267	6.77816	7.34304e-06	0	0	0	12.1378	26.5775	30.7876	up	Similar to bpaC: Autotransporter adhesin BpaC (Burkholderia pseudomallei (strain 1026b) OX%3D884204)		ANN05240	2.66389	7.13496e-06	349.781	610.525	499.716	1260.72	4431.93	3558.49	up	Similar to emsy: BRCA2-interacting transcriptional repressor EMSY (Danio rerio OX%3D7955)
ANN05276	2.12095	3.68362e-18	551.844	668.505	608.222	3145.89	2107.59	2702.02	up	Similar to eif6: Eukaryotic translation initiation factor 6 (Danio rerio OX%3D7955)		ANN05241	2.49611	6.19426e-24	79.3433	77.4262	68.6744	485.323	383.081	406.615	up	Similar to Rfc5: Replication factor C subunit 5 (Mus musculus OX%3D10090)
ANN05285	1.22843	6.6363e-06	780.492	1102.16	981.8	2798.31	1808.6	2105.71	up	Similar to Prosalpha4: Proteasome subunit alpha type-7-1 (Drosophila melanogaster OX%3D7227)		ANN05245	1.15544	3.64794e-05	93.8709	91.3883	86.2083	228.716	188.521	188.232	up	Similar to Zrsr1: U2 small nuclear ribonucleoprotein auxiliary factor 35 kDa subunit-related protein 1 (Mus musculus OX%3D10090)
ANN05293	1.01374	0.00602336	57.8857	49.4426	54.0299	97.1021	111.625	116.669	up	Similar to Rest: RE1-silencing transcription factor (Rattus norvegicus OX%3D10116)		ANN05247	1.97061	9.37962e-10	65.9331	93.9269	159.266	452.65	369.663	420.467	up	Similar to mael: Protein maelstrom homolog (Culex quinquefasciatus OX%3D7176)
ANN05302	1.2172	0.0183287	80.0752	31.9317	24.6994	104.826	118.934	98.0341	up	Similar to Transposable element Tcb2 transposase (Caenorhabditis briggsae OX%3D6238)		ANN05248	1.71939	1.75384e-08	55.8755	62.1948	46.757	190.464	165.711	188.232	up	Protein of unknown function
ANN05350	1.35219	0.0017092	41.4848	48.4125	27.7868	79.4472	96.3434	127.201	up	Similar to fand: Pre-mRNA-splicing factor syf1 homolog (Drosophila melanogaster OX%3D7227)		ANN05253	1.88758	9.40077e-17	141.924	147.237	135.888	588.923	440.107	545.141	up	Similar to Imp3: U3 small nucleolar ribonucleoprotein protein IMP3 (Mus musculus OX%3D10090)
ANN05370	1.79136	8.80232e-08	104.194	107.126	131.215	251.583	473.079	455.332	up	Similar to nup188: Nucleoporin NUP188 homolog (Xenopus tropicalis OX%3D8364)		ANN05257	2.88388	4.09139e-69	541.993	436.633	467.57	3484.13	3489.99	3710.05	up	Similar to got2: Aspartate aminotransferase%2C mitochondrial (Xenopus tropicalis OX%3D8364)
ANN05371	1.03259	0.0249158	38.5905	25.7513	50.9424	73.93	71.7592	87.5015	up	Protein of unknown function		ANN05266	7.88775	4.35226e-59	2.23502	10.1543	2.92231	931.598	1240.48	1435.78	up	Protein of unknown function
ANN05372	1.28979	3.73434e-05	157.256	135.967	89.5352	340.961	289.03	312.737	up	Similar to ZNF846: Zinc finger protein 846 (Homo sapiens OX%3D9606)		ANN05267	7.00171	3.59313e-06	0	0	0	34.2675	12.0761	44.0024	up	Similar to bpaC: Autotransporter adhesin BpaC (Burkholderia pseudomallei (strain 1026b) OX%3D884204)
ANN05391	1.65162	2.33468e-13	563.421	759.149	625.203	2130.73	1993.98	1996.33	up	Similar to Eukaryotic translation initiation factor 3 subunit H (Bombyx mori OX%3D7091)		ANN05269	6.02825	0.000303024	0	0	0	8.7661	16.7724	20.3715	up	Similar to RyR: Ryanodine receptor (Drosophila melanogaster OX%3D7227)
ANN05392	2.31875	3.35254e-15	63.6743	62.8333	58.661	272.548	358.796	293.292	up	Similar to cdt1: DNA replication factor Cdt1 (Xenopus laevis OX%3D8355)		ANN05276	1.79329	1.34552e-19	680.564	524.214	603.458	2427.41	1771.83	2071.37	up	Similar to eif6: Eukaryotic translation initiation factor 6 (Danio rerio OX%3D7955)
ANN05393	1.49328	0.0107555	32.8019	8.24043	23.1557	58.4819	63.786	58.3344	up	Similar to CDC23: Cell division cycle protein 23 homolog (Bos taurus OX%3D9913)		ANN05285	1.03251	7.46916e-10	921.946	866.92	970.208	2040.91	1716.15	1886.4	up	Similar to Prosalpha4: Proteasome subunit alpha type-7-1 (Drosophila melanogaster OX%3D7227)
ANN05402	1.92768	1.2496e-08	77.181	67.9835	41.6802	225.1	219.264	274.658	up	Similar to cdt1: DNA replication factor Cdt1 (Xenopus laevis OX%3D8355)		ANN05350	1.1803	0.0224578	36.8779	34.2706	17.5339	83.6764	69.1021	49.7064	up	Similar to fand: Pre-mRNA-splicing factor syf1 homolog (Drosophila melanogaster OX%3D7227)
ANN05407	2.0284	1.59078e-11	125.419	76.224	101.885	460.132	352.152	427.785	up	Similar to DCLRE1A: DNA cross-link repair 1A protein (Gallus gallus OX%3D9031)		ANN05370	1.49365	1.13537e-07	195.564	139.621	116.893	426.351	505.184	345.5	up	Similar to nup188: Nucleoporin NUP188 homolog (Xenopus tropicalis OX%3D8364)
ANN05409	3.22433	1.18788e-25	37.6257	39.142	30.8742	376.271	335.541	303.015	up	Protein of unknown function		ANN05391	1.77527	2.08257e-17	516.29	398.555	414.969	1826.54	1369.97	1360	up	Similar to Eukaryotic translation initiation factor 3 subunit H (Bombyx mori OX%3D7091)
ANN05411	1.7418	4.34748e-09	313.548	404.811	405.996	1687.15	922.239	1150.48	up	Similar to Timm10: Mitochondrial import inner membrane translocase subunit Tim10 (Rattus norvegicus OX%3D10116)		ANN05392	1.46629	8.91702e-08	141.924	162.468	112.509	295.657	444.803	413.133	up	Similar to cdt1: DNA replication factor Cdt1 (Xenopus laevis OX%3D8355)
ANN05412	1.91869	5.33057e-13	159.186	234.852	185.245	673.094	683.706	833.695	up	Similar to rcc1: Regulator of chromosome condensation (Xenopus laevis OX%3D8355)		ANN05402	2.44233	7.62722e-10	23.4677	44.4249	40.9124	265.374	136.192	186.603	up	Similar to cdt1: DNA replication factor Cdt1 (Xenopus laevis OX%3D8355)
ANN05425	1.67856	2.43655e-10	122.525	146.268	169.808	505.372	429.226	464.244	up	Similar to UTP23: rRNA-processing protein UTP23 homolog (Homo sapiens OX%3D9606)		ANN05407	1.33996	3.27947e-06	140.806	106.62	103.742	372.161	260.307	259.125	up	Similar to DCLRE1A: DNA cross-link repair 1A protein (Gallus gallus OX%3D9031)
ANN05426	5.40594	3.41175e-72	29.9076	66.9535	58.661	2164.94	2101.61	2273.42	up	Similar to CycB3: G2/mitotic-specific cyclin-B3 (Drosophila melanogaster OX%3D7227)		ANN05409	2.45399	1.21962e-17	51.4055	48.2327	55.524	330.721	277.079	241.198	up	Protein of unknown function
ANN05427	1.42449	6.47869e-07	264.345	418.202	358.141	1076.95	740.847	975.48	up	Similar to Thoc7: THO complex subunit 7 homolog (Mus musculus OX%3D10090)		ANN05412	1.51417	1.71077e-10	189.977	272.896	235.246	769.026	670.224	552.474	up	Similar to rcc1: Regulator of chromosome condensation (Xenopus laevis OX%3D8355)
ANN05431	7.31582	3.63218e-87	16.401	13.3907	3.08742	1725.77	1790.66	2091.94	up	Protein of unknown function		ANN05425	1.51525	2.34595e-10	130.749	151.045	115.431	421.57	360.27	355.278	up	Similar to UTP23: rRNA-processing protein UTP23 homolog (Homo sapiens OX%3D9606)
ANN05444	1.87113	6.46002e-06	29.9076	28.8415	30.8742	81.654	105.646	139.354	up	Similar to ERP44: Endoplasmic reticulum resident protein 44 (Bos taurus OX%3D9913)		ANN05426	4.8807	1.91049e-94	69.2857	50.7713	51.1405	1981.94	1462.55	1630.53	up	Similar to CycB3: G2/mitotic-specific cyclin-B3 (Drosophila melanogaster OX%3D7227)
ANN05466	1.34991	3.14681e-05	105.159	142.147	174.439	408.27	273.084	389.706	up	Similar to MED8: Mediator of RNA polymerase II transcription subunit 8 (Drosophila melanogaster OX%3D7227)		ANN05427	1.15014	6.99248e-11	382.189	388.4	357.983	827.998	858.745	818.933	up	Similar to Thoc7: THO complex subunit 7 homolog (Mus musculus OX%3D10090)
ANN05470	3.81847	8.86529e-05	3.85905	0	9.26226	115.86	46.5106	12.153	up	Similar to Tret1: Facilitated trehalose transporter Tret1 (Bombyx mori OX%3D7091)		ANN05431	6.0918	5.05898e-93	18.9977	31.7321	13.1504	1701.42	1302.88	1389.33	up	Protein of unknown function
ANN05474	2.87826	0.012049	5.78857	0	4.63113	51.8613	17.9398	6.4816	up	Similar to Tret1: Facilitated trehalose transporter Tret1 (Bombyx mori OX%3D7091)		ANN05440	2.45756	0.0332279	3.35253	5.07713	0	15.9384	16.1015	15.4823	up	Protein of unknown function
ANN05481	1.64809	5.0901e-11	241.19	322.407	304.111	1027.3	797.325	893.65	up	Similar to WDR43: WD repeat-containing protein 43 (Homo sapiens OX%3D9606)		ANN05441	1.6027	2.12728e-05	44.7004	27.9242	54.0628	130.695	116.065	136.896	up	Similar to spir: Protein spire (Drosophila melanogaster OX%3D7227)
ANN05493	2.2081	0.0140665	5.78857	4.12021	3.08742	29.7927	16.6109	15.3938	up	Similar to RTase: Probable RNA-directed DNA polymerase from transposon BS (Drosophila melanogaster OX%3D7227)		ANN05442	1.16357	0.00857035	109.516	133.275	86.2083	405.631	128.141	204.53	up	Protein of unknown function
ANN05498	1.68881	2.23039e-06	34.7314	49.4426	57.1173	141.239	158.8	150.697	up	Similar to AAMP: Angio-associated migratory cell protein (Pongo abelii OX%3D9601)		ANN05470	4.64078	0.00142577	2.23502	0	0	28.6891	18.1142	14.6675	up	Similar to Tret1: Facilitated trehalose transporter Tret1 (Bombyx mori OX%3D7091)
ANN05503	2.05107	5.42327e-06	27.9781	32.9617	12.3497	90.4815	106.31	113.428	up	Similar to PCID2: PCI domain-containing protein 2 (Homo sapiens OX%3D9606)		ANN05474	3.3394	0.000804342	2.23502	2.53856	2.92231	14.3445	37.5701	25.2606	up	Similar to Tret1: Facilitated trehalose transporter Tret1 (Bombyx mori OX%3D7091)
ANN05517	2.36407	0.0135048	3.85905	2.06011	6.17484	19.8618	11.2954	29.1672	up	Protein of unknown function		ANN05481	1.60028	4.83829e-17	365.426	356.668	287.848	1035.99	949.987	1081.32	up	Similar to WDR43: WD repeat-containing protein 43 (Homo sapiens OX%3D9606)
ANN05518	3.83349	0.0192664	0	2.06011	0	11.0343	9.30212	11.3428	up	Similar to R1A1-element\ORF1: Uncharacterized 50 kDa protein in type I retrotransposable element R1DM (Drosophila melanogaster OX%3D7227)		ANN05491	4.30971	0.0214195	0	0	1.46116	6.37535	9.39252	11.408	up	Similar to ssu72: RNA polymerase II subunit A C-terminal domain phosphatase SSU72 (Danio rerio OX%3D7955)
ANN05525	5.85117	0.00080077	0	0	0	22.0687	5.3155	9.72239	up	Protein of unknown function		ANN05498	1.92835	1.43716e-09	42.4654	45.6942	43.8347	156.993	156.318	189.047	up	Similar to AAMP: Angio-associated migratory cell protein (Pongo abelii OX%3D9601)
ANN05532	1.199	1.72427e-05	150.503	129.787	188.333	376.271	338.863	356.488	up	Similar to DUS2: tRNA-dihydrouridine(20) synthase [NAD(P)+]-like (Homo sapiens OX%3D9606)		ANN05517	3.04183	0.02259	5.58755	0	0	14.3445	16.7724	17.9269	up	Protein of unknown function
ANN05533	1.70148	3.18077e-06	41.4848	69.0136	74.0981	243.859	166.109	187.156	up	Protein of unknown function		ANN05518	3.82369	0.0174595	0	0	2.92231	11.1569	13.4179	13.0377	up	Similar to R1A1-element\ORF1: Uncharacterized 50 kDa protein in type I retrotransposable element R1DM (Drosophila melanogaster OX%3D7227)
ANN05535	2.43007	2.66905e-11	32.8019	70.0436	63.2921	304.547	236.54	349.196	up	Similar to Rpa2: Replication protein A 32 kDa subunit (Rattus norvegicus OX%3D10116)		ANN05525	5.67275	0.00359456	0	0	0	17.5322	1.34179	17.112	up	Protein of unknown function
ANN05536	3.77192	4.12407e-12	5.78857	8.24043	7.71855	133.515	79.7325	82.6404	up	Similar to ttk: Dual specificity protein kinase Ttk (Danio rerio OX%3D7955)		ANN05533	1.71243	2.89539e-07	43.5829	48.2327	36.5289	145.039	142.23	134.452	up	Protein of unknown function
ANN05538	2.8101	2.93974e-15	31.8371	57.683	41.6802	260.41	265.11	394.567	up	Similar to Fib: rRNA 2'-O-methyltransferase fibrillarin (Drosophila erecta OX%3D7220)		ANN05535	2.48343	1.10746e-13	46.9355	31.7321	36.5289	244.654	169.736	233.05	up	Similar to Rpa2: Replication protein A 32 kDa subunit (Rattus norvegicus OX%3D10116)
ANN05539	1.45452	0.0204829	28.9429	11.3306	12.3497	33.103	51.1617	61.5752	up	Similar to Naxd: ATP-dependent (S)-NAD(P)H-hydrate dehydratase (Rattus norvegicus OX%3D10116)		ANN05536	5.00618	1.62262e-10	2.23502	0	5.84463	62.9566	108.685	75.7819	up	Similar to ttk: Dual specificity protein kinase Ttk (Danio rerio OX%3D7955)
ANN05542	4.98023	3.54965e-17	5.78857	4.12021	1.54371	130.205	108.968	146.646	up	Similar to MPS1: Serine/threonine-protein kinase MPS1 (Saccharomyces cerevisiae (strain ATCC 204508 / S288c) OX%3D559292)		ANN05538	2.60389	3.98107e-15	92.7534	81.2341	59.9074	291.672	502.5	633.145	up	Similar to Fib: rRNA 2'-O-methyltransferase fibrillarin (Drosophila erecta OX%3D7220)
ANN05544	3.14656	2.41108e-36	157.256	208.071	189.876	1939.83	1560.76	1412.99	up	Similar to Fib: rRNA 2'-O-methyltransferase fibrillarin (Drosophila erecta OX%3D7220)		ANN05542	7.13488	6.54601e-10	2.23502	0	0	151.415	83.8618	118.155	up	Similar to MPS1: Serine/threonine-protein kinase MPS1 (Saccharomyces cerevisiae (strain ATCC 204508 / S288c) OX%3D559292)
ANN05545	1.92495	8.72423e-05	27.0133	16.4809	15.4371	97.1021	67.1082	63.1956	up	Protein of unknown function		ANN05544	2.918	7.28323e-28	239.147	130.736	255.702	1718.16	1755.06	1251.62	up	Similar to Fib: rRNA 2'-O-methyltransferase fibrillarin (Drosophila erecta OX%3D7220)
ANN05557	1.74316	0.00825023	5.78857	16.4809	12.3497	48.551	34.5507	32.408	up	Similar to pol: Retrovirus-related Pol polyprotein from type-2 retrotransposable element R2DM (Drosophila melanogaster OX%3D7227)		ANN05545	1.78276	0.0105288	16.7627	11.4235	5.84463	52.5966	40.9246	25.2606	up	Protein of unknown function
ANN05560	1.81015	0.0022379	15.4362	10.3005	18.5245	34.2064	45.8462	72.918	up	Similar to PDCD11: Protein RRP5 homolog (Bos taurus OX%3D9913)		ANN05556	3.79218	0.0414198	0	2.53856	0	1.59384	22.1395	11.408	up	Protein of unknown function
ANN05564	10.6734	2.22254e-17	0	0	0	355.305	288.366	396.188	up	Protein of unknown function		ANN05560	2.3644	0.000122264	13.4101	6.34641	10.2281	57.3781	36.2283	61.9293	up	Similar to PDCD11: Protein RRP5 homolog (Bos taurus OX%3D9913)
ANN05565	5.60574	0.000155956	0	2.06011	15.4371	427.029	157.472	236.578	up	Protein of unknown function		ANN05562	3.41573	0.0255263	2.23502	1.26928	0	23.1106	12.0761	4.07429	up	Similar to R1A1-element\ORF2: Putative 115 kDa protein in type-1 retrotransposable element R1DM (Drosophila melanogaster OX%3D7227)
ANN05566	3.30199	7.40354e-11	20.26	14.4207	12.3497	73.93	177.405	217.133	up	Protein of unknown function		ANN05564	10.8328	2.08983e-18	0	0	0	428.742	418.638	435.949	up	Protein of unknown function
ANN05570	2.89773	3.9561e-11	13.5067	40.1721	26.2431	143.446	224.58	225.235	up	Similar to PDCD11: Protein RRP5 homolog (Homo sapiens OX%3D9606)		ANN05565	10.1686	1.74629e-15	0	0	0	392.881	166.382	250.977	up	Protein of unknown function
ANN05589	3.09893	0.00162141	0.964762	5.15027	1.54371	23.1721	17.2754	26.7366	up	Protein of unknown function		ANN05566	3.06741	1.37415e-05	8.94009	5.07713	2.92231	60.5658	52.3298	32.5944	up	Protein of unknown function
ANN05591	3.1956	5.91329e-12	9.64762	12.3606	13.8934	109.24	88.3701	127.201	up	Similar to Esco2: N-acetyltransferase ESCO2 (Mus musculus OX%3D10090)		ANN05570	2.92945	1.36114e-11	42.4654	17.77	11.6893	206.402	172.42	180.084	up	Similar to PDCD11: Protein RRP5 homolog (Homo sapiens OX%3D9606)
ANN05592	1.10452	7.06999e-05	208.389	188.5	159.002	335.444	424.575	437.508	up	Similar to CPSF1: Cleavage and polyadenylation specificity factor subunit 1 (Bos taurus OX%3D9913)		ANN05591	2.36325	1.40804e-05	6.70507	21.5778	16.0727	80.4888	58.3678	87.1899	up	Similar to Esco2: N-acetyltransferase ESCO2 (Mus musculus OX%3D10090)
ANN05601	3.09358	7.79216e-18	27.9781	35.0218	54.0299	393.926	245.842	342.714	up	Similar to GVQW3: Protein GVQW3 (Homo sapiens OX%3D9606)		ANN05592	1.24563	3.6442e-07	193.329	172.622	274.698	495.683	485.057	534.547	up	Similar to CPSF1: Cleavage and polyadenylation specificity factor subunit 1 (Bos taurus OX%3D9913)
ANN05607	6.99053	3.24122e-10	9.64762	1.03005	6.17484	1494.05	295.675	354.057	up	Similar to dyw: Circadian clock-controlled protein daywake (Drosophila yakuba OX%3D7245)		ANN05601	4.70578	6.41978e-45	17.8802	22.8471	11.6893	388.099	479.69	514.176	up	Similar to GVQW3: Protein GVQW3 (Homo sapiens OX%3D9606)
ANN05612	1.01882	0.034571	27.9781	27.8114	32.4179	58.4819	49.1684	70.4874	up	Similar to Ppt2: Lysosomal thioesterase PPT2 homolog (Drosophila melanogaster OX%3D7227)		ANN05607	6.95475	3.72425e-44	6.70507	0	7.30579	554.655	551.475	623.367	up	Similar to dyw: Circadian clock-controlled protein daywake (Drosophila yakuba OX%3D7245)
ANN05618	3.62548	0.0360904	0	2.06011	0	8.82746	11.9599	6.4816	up	Similar to RTase: Probable RNA-directed DNA polymerase from transposon BS (Drosophila melanogaster OX%3D7227)		ANN05631	2.49144	4.21742e-06	10.0576	27.9242	7.30579	88.4579	86.5454	80.671	up	Similar to Rad54b: DNA repair and recombination protein RAD54B (Mus musculus OX%3D10090)
ANN05631	1.71118	2.25183e-05	36.661	24.7213	32.4179	107.033	111.625	88.3117	up	Similar to Rad54b: DNA repair and recombination protein RAD54B (Mus musculus OX%3D10090)		ANN05632	2.39799	3.92917e-07	29.0553	17.77	10.2281	98.8179	86.5454	120.599	up	Similar to RAD54B: DNA repair and recombination protein RAD54B (Homo sapiens OX%3D9606)
ANN05632	1.58194	0.000108218	59.8152	27.8114	41.6802	127.998	144.183	115.859	up	Similar to RAD54B: DNA repair and recombination protein RAD54B (Homo sapiens OX%3D9606)		ANN05641	2.01691	3.05674e-10	45.8179	54.5791	48.2182	243.06	163.698	194.751	up	Similar to rbck1: RanBP-type and C3HC4-type zinc finger-containing protein 1 (Dicentrarchus labrax OX%3D13489)
ANN05638	2.20232	0.000287504	11.5771	18.541	4.63113	48.551	70.4303	45.3712	up	Similar to TfIIB: Transcription initiation factor IIB (Drosophila melanogaster OX%3D7227)		ANN05642	1.3664	8.73518e-06	58.1106	74.8877	94.9752	192.057	207.306	184.973	up	Similar to edc4: Enhancer of mRNA-decapping protein 4 (Danio rerio OX%3D7955)
ANN05641	1.51543	3.80205e-06	87.7933	99.9152	72.5544	186.48	287.037	272.227	up	Similar to rbck1: RanBP-type and C3HC4-type zinc finger-containing protein 1 (Dicentrarchus labrax OX%3D13489)		ANN05643	2.05562	1.89401e-17	137.454	142.16	124.198	671.005	449.499	560.623	up	Protein of unknown function
ANN05643	2.02661	3.88941e-10	225.754	121.546	146.652	815.437	516.932	686.239	up	Protein of unknown function		ANN05645	1.81733	2.37751e-09	46.9355	50.7713	55.524	184.088	190.534	163.787	up	Protein of unknown function
ANN05644	1.92152	0.0264758	7.7181	4.12021	4.63113	22.0687	27.2419	13.7734	up	Protein of unknown function		ANN05646	1.18032	6.40404e-11	431.359	416.325	483.643	1077.43	940.594	997.387	up	Similar to TfIIB: Transcription initiation factor IIB (Drosophila melanogaster OX%3D7227)
ANN05645	1.43904	3.99555e-05	65.6038	82.4043	66.3795	139.033	220.593	221.184	up	Protein of unknown function		ANN05653	1.64705	3.22437e-17	424.654	351.591	382.823	1338.82	1031.84	1262.22	up	Similar to MAK16: Protein MAK16 homolog (Bos taurus OX%3D9913)
ANN05646	1.3119	1.40174e-08	451.509	498.546	469.288	1335.15	1024.56	1165.88	up	Similar to TfIIB: Transcription initiation factor IIB (Drosophila melanogaster OX%3D7227)		ANN05662	1.22829	3.43147e-16	12758.6	11890.6	12095.5	26272	28199.7	31619	up	Similar to RpS27A: Ubiquitin-40S ribosomal protein S27a (Drosophila melanogaster OX%3D7227)
ANN05647	1.03368	5.5416e-06	520.971	567.559	489.356	1190.6	1020.58	1022.47	up	Similar to Fam98a: Protein FAM98A (Rattus norvegicus OX%3D10116)		ANN05666	3.1009	3.32143e-21	34.6428	26.6549	37.9901	341.081	219.382	290.09	up	Similar to hdac8: Histone deacetylase 8 (Xenopus laevis OX%3D8355)
ANN05653	2.04235	4.20499e-18	352.138	434.683	327.267	1670.6	1366.08	1559.63	up	Similar to MAK16: Protein MAK16 homolog (Bos taurus OX%3D9913)		ANN05676	2.43747	8.10082e-06	29.0553	30.4628	32.1455	287.688	55.6842	153.193	up	Similar to LSM4: U6 snRNA-associated Sm-like protein LSm4 (Homo sapiens OX%3D9606)
ANN05662	1.90306	1.84443e-13	8287.3	9123.18	9859.68	43506.2	25393.5	33091	up	Similar to RpS27A: Ubiquitin-40S ribosomal protein S27a (Drosophila melanogaster OX%3D7227)		ANN05678	2.23252	4.42632e-12	94.9884	55.8484	81.8248	385.709	253.598	456.321	up	Similar to Nop60B: H/ACA ribonucleoprotein complex subunit 4 (Drosophila melanogaster OX%3D7227)
ANN05666	2.44035	1.05722e-16	63.6743	69.0136	77.1855	444.683	309.628	381.604	up	Similar to hdac8: Histone deacetylase 8 (Xenopus laevis OX%3D8355)		ANN05682	1.17129	0.0349912	20.1152	21.5778	29.2231	42.2367	73.1275	43.1875	up	Similar to STAM: Signal transducing adapter molecule 1 (Homo sapiens OX%3D9606)
ANN05669	2.00236	0.00936154	5.78857	11.3306	7.71855	52.9648	15.9465	31.5978	up	Similar to jockey\pol: RNA-directed DNA polymerase from mobile element jockey (Drosophila funebris OX%3D7221)		ANN05688	1.85626	0.00151061	16.7627	16.5007	8.76694	37.4552	63.0641	52.9658	up	Similar to PCCA: Propionyl-CoA carboxylase alpha chain%2C mitochondrial (Homo sapiens OX%3D9606)
ANN05670	1.79619	0.00050292	19.2952	18.541	16.9808	86.0678	44.5173	61.5752	up	Similar to PRDX6: Peroxiredoxin-6 (Bos taurus OX%3D9913)		ANN05689	2.03424	1.51435e-05	26.8203	22.8471	46.757	182.494	77.1529	132.822	up	Protein of unknown function
ANN05676	3.14943	3.49503e-20	27.9781	39.142	54.0299	428.132	300.326	329.751	up	Similar to LSM4: U6 snRNA-associated Sm-like protein LSm4 (Homo sapiens OX%3D9606)		ANN05694	2.61865	6.79613e-23	58.1106	107.889	99.3587	530.748	562.21	528.029	up	Similar to LSM4: U6 snRNA-associated Sm-like protein LSm4 (Homo sapiens OX%3D9606)
ANN05678	2.77047	1.58445e-10	31.8371	33.9918	83.3604	449.097	328.232	222.805	up	Similar to Nop60B: H/ACA ribonucleoprotein complex subunit 4 (Drosophila melanogaster OX%3D7227)		ANN05696	2.95883	5.62788e-17	50.288	21.5778	48.2182	382.521	305.257	246.087	up	Similar to Dkc1: H/ACA ribonucleoprotein complex subunit DKC1 (Mus musculus OX%3D10090)
ANN05682	1.69269	0.00052682	36.661	19.571	21.6119	71.7231	67.7726	114.238	up	Similar to STAM: Signal transducing adapter molecule 1 (Homo sapiens OX%3D9606)		ANN05697	3.22678	7.49951e-36	55.8755	49.502	42.3736	416.788	501.829	471.803	up	Similar to Nop60B: H/ACA ribonucleoprotein complex subunit 4 (Drosophila melanogaster OX%3D7227)
ANN05689	2.01647	1.95204e-08	55.9562	32.9617	40.1365	164.411	161.458	198.499	up	Protein of unknown function		ANN05705	1.51466	0.000638798	27.9378	30.4628	29.2231	106.787	63.0641	80.671	up	Similar to PCCA: Propionyl-CoA carboxylase alpha chain%2C mitochondrial (Homo sapiens OX%3D9606)
ANN05694	3.21256	3.43738e-23	60.78	98.8851	60.2047	818.747	498.328	731.61	up	Similar to LSM4: U6 snRNA-associated Sm-like protein LSm4 (Homo sapiens OX%3D9606)		ANN05712	1.94635	1.34789e-12	84.9308	58.387	73.0579	304.423	265.674	265.644	up	Similar to CEBPZ: CCAAT/enhancer-binding protein zeta (Homo sapiens OX%3D9606)
ANN05696	3.04411	3.0452e-19	34.7314	58.713	38.5928	436.959	285.708	371.882	up	Similar to Dkc1: H/ACA ribonucleoprotein complex subunit DKC1 (Mus musculus OX%3D10090)		ANN05714	8.15725	1.59029e-09	0	0	0	94.0364	44.279	62.7441	up	Protein of unknown function
ANN05697	2.91811	8.58262e-21	45.3438	41.2021	41.6802	286.893	293.017	390.516	up	Similar to Nop60B: H/ACA ribonucleoprotein complex subunit 4 (Drosophila melanogaster OX%3D7227)		ANN05715	2.22864	1.54982e-16	93.8709	63.4641	103.742	351.441	417.967	452.247	up	Similar to CEBPZ: CCAAT/enhancer-binding protein zeta (Homo sapiens OX%3D9606)
ANN05701	1.18517	0.00112966	79.1105	91.6748	54.0299	159.998	146.841	208.221	up	Similar to STAM: Signal transducing adapter molecule 1 (Homo sapiens OX%3D9606)		ANN05722	4.22768	1.20243e-19	4.47004	11.4235	13.1504	217.559	150.951	162.157	up	Protein of unknown function
ANN05712	2.3441	9.9915e-08	48.2381	78.2841	18.5245	275.858	259.131	213.082	up	Similar to CEBPZ: CCAAT/enhancer-binding protein zeta (Homo sapiens OX%3D9606)		ANN05723	2.2219	1.92816e-41	350.898	343.976	319.993	1569.93	1541.04	1627.27	up	Similar to RRP12: RRP12-like protein (Gallus gallus OX%3D9031)
ANN05714	4.9172	1.69991e-09	1.92952	4.12021	0	92.6884	60.4638	47.8018	up	Protein of unknown function		ANN05727	1.58248	1.64621e-07	89.4009	159.93	87.6694	370.567	305.257	334.092	up	Similar to ccndbp1: Cyclin-D1-binding protein 1 homolog (Xenopus laevis OX%3D8355)
ANN05715	2.45116	3.25904e-11	74.2867	71.0737	27.7868	340.961	333.547	287.621	up	Similar to CEBPZ: CCAAT/enhancer-binding protein zeta (Homo sapiens OX%3D9606)		ANN05747	1.25867	3.31537e-09	297.258	380.785	293.693	855.89	678.945	791.228	up	Similar to CG6153: PITH domain-containing protein CG6153 (Drosophila melanogaster OX%3D7227)
ANN05722	3.43028	1.79909e-19	24.119	21.6311	12.3497	242.755	184.714	215.513	up	Protein of unknown function		ANN05769	2.27412	0.00559075	14.5276	6.34641	5.84463	56.5812	12.747	61.9293	up	Similar to FAN1: Fanconi-associated nuclease 1 (Ailuropoda melanoleuca OX%3D9646)
ANN05723	2.20178	2.89984e-23	386.87	307.986	339.616	1697.08	1529.53	1535.33	up	Similar to RRP12: RRP12-like protein (Gallus gallus OX%3D9031)		ANN05771	2.57708	0.00836627	0	15.2314	5.84463	61.3627	16.1015	47.2618	up	Similar to Ack-like: Activated Cdc42 kinase-like (Drosophila melanogaster OX%3D7227)
ANN05727	1.76244	8.25599e-10	115.771	109.186	152.827	506.476	382.716	387.275	up	Similar to ccndbp1: Cyclin-D1-binding protein 1 homolog (Xenopus laevis OX%3D8355)		ANN05773	1.57073	3.00231e-14	469.355	525.483	457.342	1732.5	1175.41	1407.26	up	Similar to HNRNPU: Heterogeneous nuclear ribonucleoprotein U (Homo sapiens OX%3D9606)
ANN05747	1.61522	3.73974e-08	295.217	330.647	404.452	1274.46	736.196	1142.38	up	Similar to CG6153: PITH domain-containing protein CG6153 (Drosophila melanogaster OX%3D7227)		ANN05775	1.03197	3.71984e-05	211.21	238.625	229.402	581.75	421.322	385.428	up	Similar to Hnrnpul1: Heterogeneous nuclear ribonucleoprotein U-like protein 1 (Mus musculus OX%3D10090)
ANN05768	1.02521	5.80407e-05	431.249	558.289	466.2	1146.47	850.48	968.188	up	Similar to otud6b: Deubiquitinase OTUD6B (Danio rerio OX%3D7955)		ANN05797	2.85498	0.0231884	4.47004	2.53856	0	5.57843	23.4813	23.6309	up	Protein of unknown function
ANN05769	1.32237	0.0124872	27.9781	23.6912	20.0682	39.7236	58.4705	81.8302	up	Similar to FAN1: Fanconi-associated nuclease 1 (Ailuropoda melanoleuca OX%3D9646)		ANN05810	5.8633	2.31474e-26	4.47004	3.80785	4.38347	282.109	203.281	252.606	up	Similar to CDK1: Cyclin-dependent kinase 1 (Gallus gallus OX%3D9031)
ANN05771	1.44025	0.0112719	23.1543	41.2021	15.4371	48.551	62.4571	107.757	up	Similar to Ack-like: Activated Cdc42 kinase-like (Drosophila melanogaster OX%3D7227)		ANN05811	5.40531	0.00345152	0	0	0	9.56302	12.0761	8.14859	up	Similar to CDK1: Cyclin-dependent kinase 1 (Bos taurus OX%3D9913)
ANN05773	1.01997	7.06999e-05	895.299	949.709	753.331	1430.05	2104.94	1735.45	up	Similar to HNRNPU: Heterogeneous nuclear ribonucleoprotein U (Homo sapiens OX%3D9606)		ANN05812	5.9289	8.85597e-28	3.35253	10.1543	0	321.158	236.826	287.645	up	Similar to Cdk1: Cyclin-dependent kinase 1 (Drosophila melanogaster OX%3D7227)
ANN05809	1.12003	3.26245e-05	833.554	1161.9	1199.46	2770.72	1906.27	2265.32	up	Similar to VBP1: Prefoldin subunit 3 (Pongo abelii OX%3D9601)		ANN05823	2.20918	2.89493e-05	18.9977	17.77	11.6893	100.412	48.3044	77.4116	up	Protein of unknown function
ANN05810	6.81819	3.7663e-23	0	5.15027	1.54371	246.066	238.533	280.329	up	Similar to CDK1: Cyclin-dependent kinase 1 (Gallus gallus OX%3D9031)		ANN05840	1.11848	0.00396351	82.6958	121.851	134.426	348.253	146.926	239.568	up	Similar to HSBP1: Heat shock factor-binding protein 1 (Homo sapiens OX%3D9606)
ANN05812	5.40003	7.88871e-06	0	15.4508	7.71855	427.029	265.775	282.76	up	Similar to Cdk1: Cyclin-dependent kinase 1 (Drosophila melanogaster OX%3D7227)		ANN05848	1.54068	1.62886e-06	103.929	88.8498	105.203	326.737	187.18	353.649	up	Similar to Rev3l: DNA polymerase zeta catalytic subunit (Mus musculus OX%3D10090)
ANN05832	1.15899	0.00138195	54.0267	50.4726	49.3987	107.033	128.901	107.757	up	Protein of unknown function		ANN05869	2.31824	0.000588127	6.70507	12.6928	5.84463	54.1905	40.2537	31.7795	up	Protein of unknown function
ANN05833	1.1218	0.000492332	85.8638	85.4944	74.0981	150.067	188.7	196.068	up	Similar to Pol: LINE-1 retrotransposable element ORF2 protein (Mus musculus OX%3D10090)		ANN05870	7.63057	1.91679e-30	2.23502	2.53856	2.92231	533.935	617.223	356.908	up	Similar to CLVS1: Clavesin-1 (Homo sapiens OX%3D9606)
ANN05835	1.31125	0.0169125	13.5067	18.541	24.6994	43.0339	49.1684	46.1814	up	Protein of unknown function		ANN05887	5.92084	2.08507e-29	2.23502	8.88498	2.92231	260.592	309.953	275.422	up	Protein of unknown function
ANN05844	1.18929	0.000195307	192.952	219.401	174.439	610.198	378.729	353.247	up	Similar to ccdc25: Coiled-coil domain-containing protein 25 (Danio rerio OX%3D7955)		ANN05888	5.21903	7.80023e-60	32.4078	8.88498	30.6843	794.528	940.594	948.496	up	Protein of unknown function
ANN05848	1.16611	7.45828e-06	160.15	159.658	191.42	358.616	377.4	407.53	up	Similar to Rev3l: DNA polymerase zeta catalytic subunit (Mus musculus OX%3D10090)		ANN05904	7.95278	4.02777e-09	0	0	0	43.0336	64.4059	66.8184	up	Protein of unknown function
ANN05866	1.33012	2.6689e-05	72.3571	72.1037	72.5544	159.998	207.969	176.623	up	Similar to UTP15: U3 small nucleolar RNA-associated protein 15 homolog (Homo sapiens OX%3D9606)		ANN05905	2.1811	6.64201e-06	17.8802	33.0013	24.8397	69.3319	106.001	167.046	up	Similar to X-element\ORF2: Probable RNA-directed DNA polymerase from transposon X-element (Drosophila melanogaster OX%3D7227)
ANN05869	1.41787	0.0246889	13.5067	9.27048	30.8742	37.5167	47.8395	53.4732	up	Protein of unknown function		ANN05908	1.11128	1.33707e-06	169.862	153.583	147.577	365.786	323.371	330.018	up	Similar to arpc1a-b: Actin-related protein 2/3 complex subunit 1A-B (Xenopus laevis OX%3D8355)
ANN05870	4.71634	4.77407e-32	18.3305	13.3907	35.5053	737.093	584.04	388.896	up	Similar to CLVS1: Clavesin-1 (Homo sapiens OX%3D9606)		ANN05917	5.25214	6.178e-10	11.1751	2.53856	27.762	716.43	426.018	422.097	up	Similar to CLVS1: Clavesin-1 (Homo sapiens OX%3D9606)
ANN05872	1.8222	0.0268283	2.89429	8.24043	9.26226	27.5858	17.9398	25.1162	up	Protein of unknown function		ANN05922	2.27611	3.27114e-05	36.8779	15.2314	26.3008	202.417	57.026	122.229	up	Protein of unknown function
ANN05873	2.0996	0.02119	3.85905	6.18032	3.08742	13.2412	22.5909	21.0652	up	Similar to Pif1: ATP-dependent DNA helicase PIF1 (Mus musculus OX%3D10090)		ANN05950	2.17987	0.000201561	17.8802	5.07713	16.0727	68.535	55.6842	52.9658	up	Similar to exosc6: Exosome complex component MTR3 (Danio rerio OX%3D7955)
ANN05875	1.37397	0.0231216	19.2952	14.4207	15.4371	61.7922	34.5507	32.408	up	Protein of unknown function		ANN05953	1.26892	0.0456759	16.7627	17.77	21.9174	70.9257	32.2029	32.5944	up	Similar to exosc6: Exosome complex component MTR3 (Danio rerio OX%3D7955)
ANN05885	4.92003	0.00509132	0	0	1.54371	3.3103	15.2821	18.6346	up	Similar to sirt5-a: NAD-dependent protein deacylase sirtuin-5A%2C mitochondrial (Xenopus laevis OX%3D8355)		ANN05955	1.1867	0.000913399	136.336	135.813	146.116	177.713	326.726	447.357	up	Similar to exosc6: Exosome complex component MTR3 (Danio rerio OX%3D7955)
ANN05887	5.16195	8.70806e-27	8.68286	2.06011	10.806	217.376	276.406	244.68	up	Protein of unknown function		ANN05957	1.69232	1.77126e-15	923.064	559.754	698.433	2238.54	2427.3	2388.35	up	Similar to AlaRS: Alanine--tRNA ligase%2C cytoplasmic (Drosophila melanogaster OX%3D7227)
ANN05888	3.94159	1.33292e-37	42.4495	38.112	75.6418	840.816	723.572	788.324	up	Protein of unknown function		ANN05971	1.66725	2.16324e-10	205.622	218.317	147.577	765.042	494.449	559.808	up	Similar to Traf6: TNF receptor-associated factor 6 (Mus musculus OX%3D10090)
ANN05904	4.27935	0.0240245	0	0	9.26226	63.9991	45.8462	59.9548	up	Protein of unknown function		ANN05983	1.16515	1.0369e-05	107.281	109.158	147.577	266.968	290.497	255.866	up	Similar to ast: Protein asteroid (Drosophila melanogaster OX%3D7227)
ANN05905	3.22239	3.65681e-09	13.5067	9.27048	3.08742	80.5506	72.4237	100.465	up	Similar to X-element\ORF2: Probable RNA-directed DNA polymerase from transposon X-element (Drosophila melanogaster OX%3D7227)		ANN05985	1.89166	4.1069e-12	79.3433	76.1569	124.198	341.878	333.435	356.908	up	Similar to Mphosph6: M-phase phosphoprotein 6 (Mus musculus OX%3D10090)
ANN05917	4.24809	9.67618e-46	38.5905	26.7814	32.4179	684.128	549.49	629.525	up	Similar to CLVS1: Clavesin-1 (Homo sapiens OX%3D9606)		ANN05986	2.12701	1.13518e-18	164.274	130.736	216.251	830.389	656.806	740.707	up	Similar to nol10: Nucleolar protein 10 (Danio rerio OX%3D7955)
ANN05922	1.43524	3.428e-05	90.6876	130.817	63.2921	280.272	231.889	264.125	up	Protein of unknown function		ANN05998	1.014	5.80181e-06	176.567	168.815	206.023	361.004	370.334	380.539	up	Similar to Rad18: E3 ubiquitin-protein ligase RAD18 (Mus musculus OX%3D10090)
ANN05937	1.08549	0.000277121	183.305	246.183	239.275	596.957	425.904	396.188	up	Protein of unknown function		ANN06000	1.66446	4.26231e-15	286.083	229.74	198.717	727.587	797.694	745.596	up	Similar to PDCD11: Protein RRP5 homolog (Homo sapiens OX%3D9606)
ANN05950	1.43142	0.00100537	36.661	27.8114	30.8742	104.826	87.0413	66.4364	up	Similar to exosc6: Exosome complex component MTR3 (Danio rerio OX%3D7955)		ANN06009	1.73176	3.5756e-07	106.164	100.273	74.519	444.68	216.028	275.422	up	Similar to AAEL003729: Probable hydroxyacid-oxoacid transhydrogenase%2C mitochondrial (Aedes aegypti OX%3D7159)
ANN05953	1.79702	0.000139669	19.2952	21.6311	23.1557	97.1021	63.1215	62.3854	up	Similar to exosc6: Exosome complex component MTR3 (Danio rerio OX%3D7955)		ANN06014	1.74168	0.00107956	15.6452	20.3085	43.8347	121.929	64.4059	77.4116	up	Similar to DHX35: Probable ATP-dependent RNA helicase DHX35 (Homo sapiens OX%3D9606)
ANN05955	1.58004	6.88514e-05	74.2867	125.667	92.6226	432.546	193.351	251.162	up	Similar to exosc6: Exosome complex component MTR3 (Danio rerio OX%3D7955)		ANN06018	1.22102	2.83622e-05	83.8133	71.0798	68.6744	176.119	174.433	171.935	up	Similar to AAEL003729: Probable hydroxyacid-oxoacid transhydrogenase%2C mitochondrial (Aedes aegypti OX%3D7159)
ANN05957	1.95742	4.48235e-20	604.906	617.002	581.979	2640.51	2203.94	2164.85	up	Similar to AlaRS: Alanine--tRNA ligase%2C cytoplasmic (Drosophila melanogaster OX%3D7227)		ANN06019	1.62715	2.93535e-07	51.4055	86.3112	68.6744	243.857	208.648	183.343	up	Similar to Pccb: Propionyl-CoA carboxylase beta chain%2C mitochondrial (Mus musculus OX%3D10090)
ANN05971	1.5957	9.65526e-10	309.689	203.951	259.343	850.747	744.834	742.143	up	Similar to Traf6: TNF receptor-associated factor 6 (Mus musculus OX%3D10090)		ANN06020	1.67286	9.83229e-15	153.099	210.701	206.023	600.877	607.83	603.81	up	Similar to Gtf3c1: General transcription factor 3C polypeptide 1 (Mus musculus OX%3D10090)
ANN05984	1.25508	0.00233886	85.8638	78.2841	67.9233	271.444	114.283	171.762	up	Protein of unknown function		ANN06053	1.68984	3.08477e-15	208.975	156.122	170.955	600.877	557.513	574.475	up	Similar to Bub1: Mitotic checkpoint serine/threonine-protein kinase BUB1 (Mus musculus OX%3D10090)
ANN05985	1.61276	6.82191e-09	110.948	106.095	114.235	396.132	298.332	319.219	up	Similar to Mphosph6: M-phase phosphoprotein 6 (Mus musculus OX%3D10090)		ANN06054	1.29125	0.00157929	34.6428	36.8092	30.6843	79.6918	93.9252	76.5967	up	Similar to BUB1B: Mitotic checkpoint serine/threonine-protein kinase BUB1 beta (Homo sapiens OX%3D9606)
ANN05986	2.36963	1.17802e-20	169.798	172.019	117.322	805.506	792.674	788.324	up	Similar to nol10: Nucleolar protein 10 (Danio rerio OX%3D7955)		ANN06060	1.64088	9.14123e-06	43.5829	53.3099	45.2959	193.651	110.698	139.341	up	Similar to Morf4l1: Mortality factor 4-like protein 1 (Rattus norvegicus OX%3D10116)
ANN05996	1.0793	0.000189695	153.397	149.358	169.808	324.409	275.077	397.808	up	Similar to smg9: Protein SMG9 (Salmo salar OX%3D8030)		ANN06079	1.82392	4.63361e-12	79.3433	71.0798	65.7521	247.045	255.611	264.829	up	Similar to Kpnb1: Importin subunit beta-1 (Mus musculus OX%3D10090)
ANN05998	1.08145	6.58409e-05	197.776	227.642	223.838	537.372	382.716	454.522	up	Similar to Rad18: E3 ubiquitin-protein ligase RAD18 (Mus musculus OX%3D10090)		ANN06084	1.07608	0.000450746	82.6958	72.3491	94.9752	151.415	199.256	175.195	up	Similar to Kpnb1: Importin subunit beta-1 (Mus musculus OX%3D10090)
ANN06000	2.54849	3.25753e-22	205.494	130.817	145.109	988.676	926.89	909.044	up	Similar to PDCD11: Protein RRP5 homolog (Homo sapiens OX%3D9606)		ANN06085	1.38708	0.0105066	12.2926	29.1935	27.762	70.1288	59.7096	49.7064	up	Similar to Hmgn5: High mobility group nucleosome-binding domain-containing protein 5 (Rattus norvegicus OX%3D10116)
ANN06009	1.30556	3.03528e-07	170.763	211.161	182.158	446.89	439.857	507.995	up	Similar to AAEL003729: Probable hydroxyacid-oxoacid transhydrogenase%2C mitochondrial (Aedes aegypti OX%3D7159)		ANN06097	1.10852	0.0112064	43.5829	60.9256	40.9124	145.836	77.8238	90.4493	up	Similar to gbb: Protein 60A (Drosophila virilis OX%3D7244)
ANN06014	1.79771	1.16786e-06	49.2029	48.4125	44.7676	208.549	118.934	170.142	up	Similar to DHX35: Probable ATP-dependent RNA helicase DHX35 (Homo sapiens OX%3D9606)		ANN06116	1.57784	0.0200998	35.7603	49.502	33.6066	250.232	34.2156	70.8927	up	Similar to Tjap1: Tight junction-associated protein 1 (Mus musculus OX%3D10090)
ANN06018	1.16352	0.000241046	101.3	99.9152	89.5352	268.134	198.002	187.966	up	Similar to AAEL003729: Probable hydroxyacid-oxoacid transhydrogenase%2C mitochondrial (Aedes aegypti OX%3D7159)		ANN06120	4.86868	0.029937	0	0	0	12.7507	1.34179	6.51887	up	Similar to TY3B-I: Transposon Ty3-I Gag-Pol polyprotein (Saccharomyces cerevisiae (strain ATCC 204508 / S288c) OX%3D559292)
ANN06019	1.33155	0.000446614	128.313	110.216	148.196	488.821	262.453	221.995	up	Similar to Pccb: Propionyl-CoA carboxylase beta chain%2C mitochondrial (Mus musculus OX%3D10090)		ANN06140	1.58517	1.8401e-26	6265.88	5358.91	6123.71	17606.3	18682.4	16964.5	up	Similar to Eif4a1: Eukaryotic initiation factor 4A-I (Mus musculus OX%3D10090)
ANN06020	1.47403	7.8046e-06	211.283	172.019	175.983	333.237	538.859	681.378	up	Similar to Gtf3c1: General transcription factor 3C polypeptide 1 (Mus musculus OX%3D10090)		ANN06145	4.6042	0.0132949	1.11751	0	0	3.18767	15.4306	14.6675	up	Protein of unknown function
ANN06046	1.8573	1.9436e-09	68.4981	81.3742	80.2729	339.857	229.895	264.125	up	Similar to GGCT: Gamma-glutamylcyclotransferase (Homo sapiens OX%3D9606)		ANN06146	6.03166	1.99752e-06	0	0	2.92231	23.9076	88.5581	57.0401	up	Similar to URH1: Uridine nucleosidase 1 (Arabidopsis thaliana OX%3D3702)
ANN06053	1.94945	6.07779e-10	237.331	155.538	117.322	571.578	744.834	663.553	up	Similar to Bub1: Mitotic checkpoint serine/threonine-protein kinase BUB1 (Mus musculus OX%3D10090)		ANN06186	1.32197	0.00122498	39.1129	59.6563	77.4413	193.651	105.33	139.341	up	Similar to TBCK: TBC domain-containing protein kinase-like protein (Homo sapiens OX%3D9606)
ANN06054	2.07893	2.43296e-05	31.8371	16.4809	15.4371	62.8957	104.317	105.326	up	Similar to BUB1B: Mitotic checkpoint serine/threonine-protein kinase BUB1 beta (Homo sapiens OX%3D9606)		ANN06187	2.78018	0.00154584	2.23502	2.53856	16.0727	45.4244	20.1268	73.3373	up	Protein of unknown function
ANN06057	1.28843	6.26041e-06	338.631	204.981	282.499	749.231	590.02	679.757	up	Similar to Morf4l1: Mortality factor 4-like protein 1 (Rattus norvegicus OX%3D10116)		ANN06190	2.53449	2.31663e-08	27.9378	12.6928	13.1504	103.599	110.027	102.672	up	Protein of unknown function
ANN06059	1.1122	0.000134675	170.763	207.041	169.808	486.614	327.568	372.692	up	Similar to ybgG: Homocysteine S-methyltransferase YbgG (Bacillus subtilis (strain 168) OX%3D224308)		ANN06191	4.7815	3.82413e-06	0	5.07713	0	39.049	30.8611	70.0779	up	Protein of unknown function
ANN06060	1.36714	6.72038e-06	117.701	80.3442	89.5352	233.928	259.131	250.352	up	Similar to Morf4l1: Mortality factor 4-like protein 1 (Rattus norvegicus OX%3D10116)		ANN06196	2.67163	3.69744e-05	4.47004	12.6928	5.84463	52.5966	46.2917	47.2618	up	Similar to Pcmt1: Protein-L-isoaspartate(D-aspartate) O-methyltransferase (Mus musculus OX%3D10090)
ANN06069	1.19362	5.79127e-06	392.658	484.125	561.911	1292.12	954.796	1040.3	up	Similar to gmppaa: Mannose-1-phosphate guanyltransferase alpha-A (Danio rerio OX%3D7955)		ANN06200	1.2003	1.21736e-07	660.449	507.713	464.648	1104.53	1133.14	1518.9	up	Similar to SEC61B: Protein transport protein Sec61 subunit beta (Pongo abelii OX%3D9601)
ANN06079	1.18505	0.000701039	99.3705	94.7649	117.322	158.894	256.473	289.241	up	Similar to Kpnb1: Importin subunit beta-1 (Mus musculus OX%3D10090)		ANN06208	1.28388	0.0123878	35.7603	25.3856	16.0727	68.535	69.1021	52.151	up	Similar to gek: Serine/threonine-protein kinase Genghis Khan (Drosophila melanogaster OX%3D7227)
ANN06084	1.16975	0.000904148	84.899	70.0436	71.0107	134.619	160.129	213.893	up	Similar to Kpnb1: Importin subunit beta-1 (Mus musculus OX%3D10090)		ANN06212	1.73452	3.8184e-08	72.6382	66.0027	84.7471	178.51	260.307	303.127	up	Similar to Peptidyl-prolyl cis-trans isomerase B (Schistosoma japonicum OX%3D6182)
ANN06085	1.26104	0.00915735	37.6257	23.6912	20.0682	61.7922	65.1148	70.4874	up	Similar to Hmgn5: High mobility group nucleosome-binding domain-containing protein 5 (Rattus norvegicus OX%3D10116)		ANN06213	1.64111	3.9755e-05	35.7603	43.1556	24.8397	90.0518	116.065	118.969	up	Similar to HYDIN: Hydrocephalus-inducing protein homolog (Homo sapiens OX%3D9606)
ANN06088	1.12104	0.00824302	59.8152	50.4726	43.2239	76.1369	114.283	144.216	up	Protein of unknown function		ANN06217	1.96534	1.26694e-10	167.627	73.6184	157.805	476.557	516.589	565.512	up	Similar to sdad1: Protein SDA1 homolog (Nematostella vectensis OX%3D45351)
ANN06090	1.0361	0.00274573	117.701	82.4043	97.2537	153.377	231.224	224.425	up	Similar to rgl1: Ral guanine nucleotide dissociation stimulator-like 1 (Danio rerio OX%3D7955)		ANN06229	2.22459	5.28233e-28	274.908	217.047	213.329	1109.31	1213.65	979.46	up	Similar to SDAD1: Protein SDA1 homolog (Homo sapiens OX%3D9606)
ANN06096	1.24234	0.00598552	62.7095	80.3442	26.2431	153.377	129.565	123.15	up	Similar to N6AMT1: Methyltransferase N6AMT1 (Homo sapiens OX%3D9606)		ANN06264	4.11077	0.0142245	1.11751	0	1.46116	3.18767	30.8611	9.77831	up	Similar to X-element\ORF2: Probable RNA-directed DNA polymerase from transposon X-element (Drosophila melanogaster OX%3D7227)
ANN06097	1.14201	0.00659295	45.3438	91.6748	47.855	114.757	153.485	140.975	up	Similar to gbb: Protein 60A (Drosophila virilis OX%3D7244)		ANN06266	5.12137	8.98235e-05	0	0	2.92231	30.2829	30.8611	29.3349	up	Similar to pol: Retrovirus-related Pol polyprotein from transposon 17.6 (Drosophila melanogaster OX%3D7227)
ANN06116	1.29559	0.000763338	119.63	61.8032	106.516	178.756	306.97	218.754	up	Similar to Tjap1: Tight junction-associated protein 1 (Mus musculus OX%3D10090)		ANN06280	1.2069	1.04232e-05	136.336	167.545	106.664	295.657	364.967	288.46	up	Similar to GALM: Galactose mutarotase (Sus scrofa OX%3D9823)
ANN06120	3.09551	0.00760529	2.89429	0	3.08742	13.2412	21.262	14.5836	up	Similar to TY3B-I: Transposon Ty3-I Gag-Pol polyprotein (Saccharomyces cerevisiae (strain ATCC 204508 / S288c) OX%3D559292)		ANN06286	3.44355	0.000288074	2.23502	5.07713	2.92231	70.1288	26.1649	14.6675	up	Similar to TY3B-I: Transposon Ty3-I Gag-Pol polyprotein (Saccharomyces cerevisiae (strain ATCC 204508 / S288c) OX%3D559292)
ANN06140	2.00741	5.44083e-20	3798.27	5352.16	4523.07	18198.9	18694.6	18081.2	up	Similar to Eif4a1: Eukaryotic initiation factor 4A-I (Mus musculus OX%3D10090)		ANN06295	1.68694	0.00116033	45.8179	46.9634	10.2281	133.085	95.267	106.747	up	Similar to Wdr59: GATOR complex protein Wdr59 (Drosophila melanogaster OX%3D7227)
ANN06146	2.08443	0.0212	7.7181	1.03005	7.71855	16.5515	26.5775	25.1162	up	Similar to URH1: Uridine nucleosidase 1 (Arabidopsis thaliana OX%3D3702)		ANN06305	1.01214	1.46126e-07	390.011	434.095	395.974	913.269	737.984	809.97	up	Similar to Wdr33: pre-mRNA 3' end processing protein WDR33 (Mus musculus OX%3D10090)
ANN06177	1.96869	3.69935e-10	93.5819	115.366	114.235	564.958	340.192	359.729	up	Similar to DHCR24: Delta(24)-sterol reductase (Homo sapiens OX%3D9606)		ANN06310	1.05396	0.000177935	119.574	112.966	156.344	315.58	229.446	260.755	up	Similar to C2orf42: Uncharacterized protein C2orf42 (Homo sapiens OX%3D9606)
ANN06186	1.03919	0.00189378	81.04	100.945	138.934	215.169	201.324	238.199	up	Similar to TBCK: TBC domain-containing protein kinase-like protein (Homo sapiens OX%3D9606)		ANN06315	1.47608	3.29349e-07	98.341	87.5805	97.8975	199.23	283.788	306.387	up	Similar to POLR1H: DNA-directed RNA polymerase I subunit RPA12 (Bos taurus OX%3D9913)
ANN06187	1.08375	0.0405882	31.8371	16.4809	26.2431	55.1716	55.8127	46.9916	up	Protein of unknown function		ANN06317	1.6756	0.000658105	21.2327	19.0392	17.5339	73.3165	55.0133	57.0401	up	Similar to Bx42: Puff-specific protein Bx42 (Drosophila melanogaster OX%3D7227)
ANN06190	1.58892	0.00109521	59.8152	40.1721	24.6994	78.3437	180.062	119.91	up	Protein of unknown function		ANN06346	1.45392	2.82195e-05	45.8179	53.3099	49.6793	149.024	149.609	108.376	up	Similar to ercc5: DNA repair protein complementing XP-G cells homolog (Xenopus laevis OX%3D8355)
ANN06191	6.19955	2.65937e-15	1.92952	2.06011	3.08742	287.996	83.7191	132.873	up	Protein of unknown function		ANN06353	1.17658	0.00128484	71.5207	62.1948	127.121	236.685	180.471	169.491	up	Similar to tada1: Transcriptional adapter 1 (Xenopus laevis OX%3D8355)
ANN06200	1.25648	8.97534e-05	491.064	495.456	429.151	1615.43	778.056	993.305	up	Similar to SEC61B: Protein transport protein Sec61 subunit beta (Pongo abelii OX%3D9601)		ANN06376	2.89541	0.0156061	4.47004	2.53856	0	24.7045	21.4686	8.14859	up	Similar to Tf2-9: Transposon Tf2-9 polyprotein (Schizosaccharomyces pombe (strain 972 / ATCC 24843) OX%3D284812)
ANN06203	1.18508	3.82587e-06	218.036	209.101	185.245	497.648	491.019	406.72	up	Similar to Elp3: Elongator complex protein 3 (Drosophila melanogaster OX%3D7227)		ANN06393	4.44574	1.20294e-29	23.4677	22.8471	10.2281	269.358	558.184	422.912	up	Similar to MAD2L1: Mitotic spindle assembly checkpoint protein MAD2A (Homo sapiens OX%3D9606)
ANN06206	1.09538	0.0195672	31.8371	28.8415	23.1557	59.5854	61.7927	59.1446	up	Similar to gek: Serine/threonine-protein kinase Genghis Khan (Drosophila melanogaster OX%3D7227)		ANN06401	4.44695	0.0150991	2.23502	0	8.76694	154.602	5.36716	76.5967	up	Protein of unknown function
ANN06208	1.15912	0.0220598	25.0838	45.3223	20.0682	68.4128	75.7458	59.9548	up	Similar to gek: Serine/threonine-protein kinase Genghis Khan (Drosophila melanogaster OX%3D7227)		ANN06407	4.24838	5.25063e-108	547.58	388.4	539.167	8273.61	10527	9234.79	up	Similar to GK2: Glycerol kinase 2 (Macaca fascicularis OX%3D9541)
ANN06217	2.00817	2.76102e-13	136.031	147.298	92.6226	504.269	518.925	499.083	up	Similar to sdad1: Protein SDA1 homolog (Nematostella vectensis OX%3D45351)		ANN06408	1.50843	1.64915e-07	73.7557	69.8105	90.5917	251.826	219.382	193.122	up	Similar to Nadk2: NAD kinase 2%2C mitochondrial (Rattus norvegicus OX%3D10116)
ANN06229	2.47648	2.2738e-24	231.543	213.221	248.537	1085.78	1514.92	1250.95	up	Similar to SDAD1: Protein SDA1 homolog (Homo sapiens OX%3D9606)		ANN06411	1.77524	8.9502e-12	125.161	176.43	119.815	560.234	397.84	485.656	up	Protein of unknown function
ANN06242	4.65096	0.0370415	0	0	0	2.20687	7.97325	5.6714	up	Similar to pol: Retrovirus-related Pol polyprotein from transposon 17.6 (Drosophila melanogaster OX%3D7227)		ANN06418	1.53704	0.000259032	46.9355	68.5412	46.757	231.106	99.2924	140.971	up	Protein of unknown function
ANN06243	2.33087	0.0233836	3.85905	2.06011	3.08742	17.6549	13.2887	14.5836	up	Similar to pol: Retrovirus-related Pol polyprotein from transposon 17.6 (Drosophila melanogaster OX%3D7227)		ANN06422	1.94277	1.12095e-14	198.917	119.313	149.038	680.568	539.399	580.994	up	Similar to POLR3C: DNA-directed RNA polymerase III subunit RPC3 (Bos taurus OX%3D9913)
ANN06266	7.03968	1.01952e-06	0	0	0	26.4824	31.2285	25.9264	up	Similar to pol: Retrovirus-related Pol polyprotein from transposon 17.6 (Drosophila melanogaster OX%3D7227)		ANN06435	1.20496	0.00582478	59.2281	29.1935	49.6793	77.3011	116.065	125.488	up	Similar to Atp13a1: Manganese-transporting ATPase 13A1 (Mus musculus OX%3D10090)
ANN06280	2.15717	2.72738e-13	79.1105	65.9234	84.9041	355.305	281.057	386.465	up	Similar to GALM: Galactose mutarotase (Sus scrofa OX%3D9823)		ANN06439	1.44983	0.0465536	16.7627	45.6942	61.3686	23.1106	177.116	136.081	up	Similar to Dynein beta chain%2C ciliary (Tripneustes gratilla OX%3D7673)
ANN06282	1.48046	0.00182422	30.8724	20.6011	20.0682	71.7231	57.1416	72.918	up	Protein of unknown function		ANN06448	2.79883	3.10257e-13	77.1083	101.543	102.281	392.084	1116.37	442.468	up	Similar to CG2614: eEF1A lysine and N-terminal methyltransferase homolog (Drosophila melanogaster OX%3D7227)
ANN06286	2.82089	7.31672e-05	7.7181	4.12021	6.17484	25.379	39.2018	62.3854	up	Similar to TY3B-I: Transposon Ty3-I Gag-Pol polyprotein (Saccharomyces cerevisiae (strain ATCC 204508 / S288c) OX%3D559292)		ANN06449	1.31004	0.00431599	73.7557	57.1177	61.3686	95.6302	264.332	116.525	up	Similar to EEF1AKNMT: eEF1A lysine and N-terminal methyltransferase (Bos taurus OX%3D9913)
ANN06293	1.29065	0.000207955	122.525	115.366	71.0107	318.892	220.593	222.805	up	Similar to WDR59: GATOR complex protein WDR59 (Homo sapiens OX%3D9606)		ANN06450	1.44793	0.000175231	81.5783	79.9648	55.524	145.039	292.51	155.638	up	Protein of unknown function
ANN06295	1.45732	0.000197936	56.921	55.6229	75.6418	239.445	153.485	122.34	up	Similar to Wdr59: GATOR complex protein Wdr59 (Drosophila melanogaster OX%3D7227)		ANN06453	1.95015	3.26628e-14	90.5184	111.697	109.587	436.711	443.461	321.869	up	Similar to TFDP1: Transcription factor Dp-1 (Bos taurus OX%3D9913)
ANN06305	1.18164	5.69585e-06	329.949	438.803	447.676	1067.02	807.291	883.117	up	Similar to Wdr33: pre-mRNA 3' end processing protein WDR33 (Mus musculus OX%3D10090)		ANN06454	1.45016	0.00444481	51.4055	58.387	16.0727	156.196	88.5581	101.857	up	Similar to Son: Protein Son (Drosophila melanogaster OX%3D7227)
ANN06310	1.25878	1.32426e-06	138.926	133.907	154.371	326.616	353.481	339.474	up	Similar to C2orf42: Uncharacterized protein C2orf42 (Homo sapiens OX%3D9606)		ANN06462	1.06527	5.97569e-08	813.548	627.025	660.443	1276.66	1592.03	1530.3	up	Similar to KARS1: Lysine--tRNA ligase (Cricetulus griseus OX%3D10029)
ANN06314	1.13646	0.000137297	206.459	177.169	282.499	557.234	408.629	494.222	up	Similar to Ccnk: Cyclin-K (Mus musculus OX%3D10090)		ANN06463	1.30516	0.000324487	98.341	46.9634	59.9074	181.697	152.964	175.195	up	Similar to O-fut1: GDP-fucose protein O-fucosyltransferase 1 (Drosophila melanogaster OX%3D7227)
ANN06315	1.49106	4.20402e-06	70.4276	96.825	87.9915	250.479	188.7	277.898	up	Similar to POLR1H: DNA-directed RNA polymerase I subunit RPA12 (Bos taurus OX%3D9913)		ANN06467	1.85731	3.29565e-19	137.454	159.93	157.805	543.498	530.678	572.846	up	Similar to SNRPB: Small nuclear ribonucleoprotein-associated protein B' (Macropus eugenii OX%3D9315)
ANN06334	1.2447	0.00472545	31.8371	55.6229	29.3305	83.8609	91.0279	103.706	up	Similar to abcG20: ABC transporter G family member 20 (Dictyostelium discoideum OX%3D44689)		ANN06468	2.16443	4.79839e-18	101.693	96.4655	87.6694	467.791	348.865	467.729	up	Similar to NOB1: RNA-binding protein NOB1 (Bos taurus OX%3D9913)
ANN06353	1.53387	3.34575e-06	62.7095	58.713	78.7292	209.652	158.136	209.031	up	Similar to tada1: Transcriptional adapter 1 (Xenopus laevis OX%3D8355)		ANN06482	1.39697	0.00177876	26.8203	26.6549	39.4512	62.9566	94.5961	85.5602	up	Similar to Arp5: Actin-related protein 5 (Aedes aegypti OX%3D7159)
ANN06376	2.86381	0.0050943	3.85905	8.24043	0	7.72403	32.5574	51.8528	up	Similar to Tf2-9: Transposon Tf2-9 polyprotein (Schizosaccharomyces pombe (strain 972 / ATCC 24843) OX%3D284812)		ANN06483	1.35572	4.73296e-09	326.313	317.321	311.226	614.424	980.848	848.268	up	Similar to Ahcy: Adenosylhomocysteinase (Drosophila melanogaster OX%3D7227)
ANN06384	1.02419	0.000383544	226.719	284.295	188.333	408.27	475.737	541.213	up	Similar to MYEF2: Myelin expression factor 2 (Homo sapiens OX%3D9606)		ANN06484	1.36944	1.85655e-06	235.795	178.969	125.66	561.828	408.575	431.06	up	Similar to ahcy-1: Adenosylhomocysteinase (Caenorhabditis elegans OX%3D6239)
ANN06393	2.32029	1.00688e-11	48.2381	52.5327	87.9915	375.167	283.715	272.227	up	Similar to MAD2L1: Mitotic spindle assembly checkpoint protein MAD2A (Homo sapiens OX%3D9606)		ANN06486	1.62835	3.0541e-16	337.488	265.28	257.164	923.628	907.049	832.786	up	Similar to SNRPB: Small nuclear ribonucleoprotein-associated protein B' (Macropus eugenii OX%3D9315)
ANN06407	3.94617	2.88349e-49	414.848	593.311	674.601	6886.52	10211.7	8801.2	up	Similar to GK2: Glycerol kinase 2 (Macaca fascicularis OX%3D9541)		ANN06487	2.44363	9.15737e-06	12.2926	11.4235	14.6116	98.021	61.7223	48.0767	up	Protein of unknown function
ANN06408	1.52727	3.84813e-07	109.983	86.5245	123.497	355.305	304.312	260.074	up	Similar to Nadk2: NAD kinase 2%2C mitochondrial (Rattus norvegicus OX%3D10116)		ANN06491	1.50287	2.46595e-07	70.4032	86.3112	81.8248	234.294	184.496	256.681	up	Similar to Ddx31: Probable ATP-dependent RNA helicase DDX31 (Mus musculus OX%3D10090)
ANN06411	1.92799	7.43564e-14	144.714	166.869	146.652	494.338	586.034	663.553	up	Protein of unknown function		ANN06501	2.43993	0.00292621	13.4101	8.88498	14.6116	139.461	12.747	48.0767	up	Similar to Rpp40: Ribonuclease P protein subunit p40 (Rattus norvegicus OX%3D10116)
ANN06418	1.13044	0.00143939	99.3705	115.366	179.07	343.168	293.681	220.374	up	Protein of unknown function		ANN06525	1.08777	0.0454189	27.9378	19.0392	56.9851	68.535	89.229	61.1144	up	Protein of unknown function
ANN06422	2.68111	2.72337e-22	103.23	136.997	152.827	956.676	677.726	876.636	up	Similar to POLR3C: DNA-directed RNA polymerase III subunit RPC3 (Bos taurus OX%3D9913)		ANN06533	2.01054	9.64038e-13	69.2857	97.7347	87.6694	396.068	269.029	359.353	up	Similar to ubtf-b: Nucleolar transcription factor 1-B (Xenopus laevis OX%3D8355)
ANN06442	1.03086	0.00207262	83.9343	97.8551	94.1663	151.17	229.231	181.485	up	Similar to Atp13a1: Manganese-transporting ATPase 13A1 (Mus musculus OX%3D10090)		ANN06547	3.22243	2.08015e-28	31.2903	43.1556	32.1455	352.238	297.206	345.5	up	Similar to MFSD11: UNC93-like protein MFSD11 (Homo sapiens OX%3D9606)
ANN06443	1.23456	0.00849661	36.661	71.0737	54.0299	189.79	92.3568	99.6545	up	Similar to GFI1B: Zinc finger protein Gfi-1b (Gallus gallus OX%3D9031)		ANN06552	2.4679	0.00165082	8.94009	12.6928	2.92231	71.7227	18.785	47.2618	up	Similar to Transposable element Tcb2 transposase (Caenorhabditis briggsae OX%3D6238)
ANN06448	2.22919	3.3129e-09	69.4629	127.727	54.0299	409.374	295.675	481.259	up	Similar to CG2614: eEF1A lysine and N-terminal methyltransferase homolog (Drosophila melanogaster OX%3D7227)		ANN06577	1.43301	0.0140035	26.8203	30.4628	32.1455	137.867	37.5701	66.0036	up	Similar to CMTR2: Cap-specific mRNA (nucleoside-2'-O-)-methyltransferase 2 (Homo sapiens OX%3D9606)
ANN06453	2.0531	4.91457e-14	90.6876	103.005	114.235	363.029	447.831	461.004	up	Similar to TFDP1: Transcription factor Dp-1 (Bos taurus OX%3D9913)		ANN06583	1.04676	0.0303714	55.8755	25.3856	29.2231	82.0826	73.7984	74.1522	up	Similar to CMTR2: Cap-specific mRNA (nucleoside-2'-O-)-methyltransferase 2 (Homo sapiens OX%3D9606)
ANN06462	1.09796	0.000110663	429.319	718.977	557.279	1419.01	1130.87	1101.87	up	Similar to KARS1: Lysine--tRNA ligase (Cricetulus griseus OX%3D10029)		ANN06584	6.76158	1.68815e-05	0	0	0	7.96918	34.8865	33.4092	up	Protein of unknown function
ANN06463	1.78605	3.40942e-06	62.7095	44.2923	37.049	195.308	122.256	184.725	up	Similar to O-fut1: GDP-fucose protein O-fucosyltransferase 1 (Drosophila melanogaster OX%3D7227)		ANN06593	1.16556	1.35458e-05	96.1059	101.543	111.048	213.574	258.965	218.382	up	Similar to ntmt1: N-terminal Xaa-Pro-Lys N-methyltransferase 1 (Danio rerio OX%3D7955)
ANN06467	1.49991	8.25853e-10	169.798	174.079	172.896	449.097	485.039	526.63	up	Similar to SNRPB: Small nuclear ribonucleoprotein-associated protein B' (Macropus eugenii OX%3D9315)		ANN06606	1.68625	2.55768e-24	5221.01	4761.08	4887.57	16559.2	13529.9	17767.2	up	Similar to RPL35: 60S ribosomal protein L35 (Ophiophagus hannah OX%3D8665)
ANN06468	2.24138	3.60981e-17	109.018	107.126	84.9041	507.579	498.992	424.545	up	Similar to NOB1: RNA-binding protein NOB1 (Bos taurus OX%3D9913)		ANN06613	1.41848	2.46684e-07	747.615	766.647	863.544	3047.42	1414.25	1893.73	up	Similar to Tctp: Translationally-controlled tumor protein homolog (Plutella xylostella OX%3D51655)
ANN06483	1.25809	2.64572e-08	311.618	295.625	314.917	782.334	698.988	724.318	up	Similar to Ahcy: Adenosylhomocysteinase (Drosophila melanogaster OX%3D7227)		ANN06629	4.95005	0.0491781	0	0	0	0	12.747	8.96345	up	Protein of unknown function
ANN06484	1.11069	2.05371e-05	275.922	346.098	236.188	641.095	591.349	625.474	up	Similar to ahcy-1: Adenosylhomocysteinase (Caenorhabditis elegans OX%3D6239)		ANN06630	1.59918	3.51543e-05	31.2903	35.5399	46.757	93.2395	116.065	132.822	up	Similar to ERCC2: General transcription and DNA repair factor IIH helicase subunit XPD (Homo sapiens OX%3D9606)
ANN06486	1.62782	2.18097e-10	328.984	318.286	338.073	1220.4	795.331	1030.57	up	Similar to SNRPB: Small nuclear ribonucleoprotein-associated protein B' (Macropus eugenii OX%3D9315)		ANN06638	1.33706	0.000633977	58.1106	35.5399	42.3736	139.461	96.6088	109.191	up	Similar to E(z): Histone-lysine N-methyltransferase E(z) (Drosophila melanogaster OX%3D7227)
ANN06487	1.07417	0.0207575	23.1543	48.4125	43.2239	81.654	82.3902	76.1588	up	Protein of unknown function		ANN06642	3.72147	2.08701e-11	23.4677	10.1543	7.30579	298.048	87.2163	165.416	up	Similar to wat: Fatty acyl-CoA reductase wat (Drosophila melanogaster OX%3D7227)
ANN06491	1.85326	7.17437e-08	44.379	66.9535	87.9915	241.652	213.949	256.833	up	Similar to Ddx31: Probable ATP-dependent RNA helicase DDX31 (Mus musculus OX%3D10090)		ANN06643	4.60384	0.00187267	2.23502	0	0	23.1106	10.7343	26.0755	up	Similar to wat: Fatty acyl-CoA reductase wat (Drosophila melanogaster OX%3D7227)
ANN06525	1.07989	0.0191912	47.2733	29.8715	27.7868	75.0334	83.0546	65.6262	up	Protein of unknown function		ANN06664	1.16111	3.4039e-05	212.327	177.7	169.494	298.844	437.423	516.62	up	Similar to Rtc1: Probable RNA 3'-terminal phosphate cyclase-like protein (Drosophila melanogaster OX%3D7227)
ANN06533	2.02637	2.16911e-14	119.63	122.576	95.71	411.58	469.757	500.703	up	Similar to ubtf-b: Nucleolar transcription factor 1-B (Xenopus laevis OX%3D8355)		ANN06672	3.33852	0.000119438	2.23502	0	11.6893	49.4089	51.6589	33.4092	up	Similar to POLE4: DNA polymerase epsilon subunit 4 (Homo sapiens OX%3D9606)
ANN06547	2.4243	1.67518e-12	42.4495	37.0819	52.4861	280.272	241.855	181.485	up	Similar to MFSD11: UNC93-like protein MFSD11 (Homo sapiens OX%3D9606)		ANN06673	1.45025	2.78948e-21	1558.93	1578.99	1523.99	4061.1	4666.07	4011.55	up	Similar to Hel25E: ATP-dependent RNA helicase WM6 (Drosophila melanogaster OX%3D7227)
ANN06577	1.2304	0.0138378	20.26	24.7213	47.855	75.0334	67.1082	71.2976	up	Similar to CMTR2: Cap-specific mRNA (nucleoside-2'-O-)-methyltransferase 2 (Homo sapiens OX%3D9606)		ANN06683	1.94411	5.26108e-06	27.9378	24.1164	27.762	134.679	79.8364	92.8939	up	Similar to THG1L: Probable tRNA(His) guanylyltransferase (Homo sapiens OX%3D9606)
ANN06593	1.23094	0.00164616	75.2514	115.366	132.759	357.512	186.042	213.893	up	Similar to ntmt1: N-terminal Xaa-Pro-Lys N-methyltransferase 1 (Danio rerio OX%3D7955)		ANN06691	3.51138	3.49707e-16	26.8203	13.9621	16.0727	296.454	137.533	221.642	up	Similar to POLE4: DNA polymerase epsilon subunit 4 (Homo sapiens OX%3D9606)
ANN06606	2.52095	7.11484e-20	3267.65	4081.07	4675.9	30517.6	17624.9	20865.9	up	Similar to RPL35: 60S ribosomal protein L35 (Ophiophagus hannah OX%3D8665)		ANN06700	1.18863	0.00108229	145.276	111.697	100.82	372.161	163.027	282.756	up	Similar to JMJD4: 2-oxoglutarate and iron-dependent oxygenase JMJD4 (Gallus gallus OX%3D9031)
ANN06613	1.55211	2.14728e-11	1781.92	1586.28	1691.91	6017.02	4324.16	4499.85	up	Similar to Tctp: Translationally-controlled tumor protein homolog (Plutella xylostella OX%3D51655)		ANN06704	3.87758	6.6973e-08	0	5.07713	8.76694	65.3473	66.4186	61.1144	up	Protein of unknown function
ANN06614	1.19971	6.41439e-06	187.164	190.56	208.401	531.855	398.662	415.632	up	Similar to Tctp: Translationally-controlled tumor protein homolog (Plutella xylostella OX%3D51655)		ANN06705	1.65769	8.74532e-12	165.392	162.468	179.722	635.144	415.955	550.03	up	Similar to aroQ: Monofunctional chorismate mutase (Pseudomonas aeruginosa (strain ATCC 15692 / DSM 22644 / CIP 104116 / JCM 14847 / LMG 12228 / 1C / PRS 101 / PAO1) OX%3D208964)
ANN06615	1.53774	2.07383e-10	1494.42	1775.81	1728.96	5958.54	4488.94	4067.2	up	Similar to Tctp: Translationally-controlled tumor protein homolog (Plutella xylostella OX%3D51655)		ANN06706	2.03206	4.73904e-12	93.8709	67.272	61.3686	351.441	247.56	316.165	up	Similar to Phf5a: PHD finger-like domain-containing protein 5A (Rattus norvegicus OX%3D10116)
ANN06625	2.14589	0.00429312	5.78857	11.3306	7.71855	61.7922	19.2687	29.9774	up	Similar to Tango2: Transport and Golgi organization protein 2 (Drosophila melanogaster OX%3D7227)		ANN06707	1.35934	8.22316e-14	359.839	387.131	362.367	1041.57	923.822	880.862	up	Similar to ncm: Pre-mRNA-splicing factor CWC22 homolog (Drosophila melanogaster OX%3D7227)
ANN06638	1.40445	2.91824e-05	55.9562	60.7731	61.7484	132.412	159.465	179.054	up	Similar to E(z): Histone-lysine N-methyltransferase E(z) (Drosophila melanogaster OX%3D7227)		ANN06711	1.52272	0.00772319	10.0576	24.1164	36.5289	58.175	57.6969	84.7453	up	Similar to CG1139: Proton-coupled amino acid transporter-like protein CG1139 (Drosophila melanogaster OX%3D7227)
ANN06642	2.58973	1.40758e-13	38.5905	89.6146	52.4861	350.892	386.702	352.437	up	Similar to wat: Fatty acyl-CoA reductase wat (Drosophila melanogaster OX%3D7227)		ANN06712	1.91697	6.94909e-05	13.4101	44.4249	64.2909	141.055	157.66	157.268	up	Similar to CG1139: Proton-coupled amino acid transporter-like protein CG1139 (Drosophila melanogaster OX%3D7227)
ANN06664	1.54029	7.7243e-06	88.7581	109.186	140.478	442.477	278.399	260.074	up	Similar to Rtc1: Probable RNA 3'-terminal phosphate cyclase-like protein (Drosophila melanogaster OX%3D7227)		ANN06716	1.40645	6.5775e-08	159.804	116.774	141.732	303.626	425.347	380.539	up	Similar to Sccpdh: Saccharopine dehydrogenase-like oxidoreductase (Rattus norvegicus OX%3D10116)
ANN06672	3.09129	1.26282e-08	8.68286	5.15027	12.3497	76.1369	64.4504	76.1588	up	Similar to POLE4: DNA polymerase epsilon subunit 4 (Homo sapiens OX%3D9606)		ANN06721	1.29003	1.46233e-06	144.159	144.698	109.587	274.937	313.979	387.873	up	Similar to DCPS: m7GpppX diphosphatase (Bos taurus OX%3D9913)
ANN06673	1.58558	4.13555e-14	1427.85	1640.88	1494.31	4172.08	4467.01	5055.65	up	Similar to Hel25E: ATP-dependent RNA helicase WM6 (Drosophila melanogaster OX%3D7227)		ANN06722	2.52834	1.35504e-32	113.986	161.199	135.888	816.044	794.339	757.004	up	Similar to Btbd9: BTB/POZ domain-containing protein 9 (Mus musculus OX%3D10090)
ANN06683	2.14123	3.78083e-06	33.7667	15.4508	46.3113	180.963	126.243	108.567	up	Similar to THG1L: Probable tRNA(His) guanylyltransferase (Homo sapiens OX%3D9606)		ANN06724	1.93346	4.03074e-35	7735.41	6615.5	6341.42	25155.5	25495.3	28395.4	up	Similar to RPS12: 40S ribosomal protein S12 (Gallus gallus OX%3D9031)
ANN06691	2.0992	3.0865e-13	56.921	70.0436	67.9233	287.996	269.762	275.468	up	Similar to POLE4: DNA polymerase epsilon subunit 4 (Homo sapiens OX%3D9606)		ANN06726	1.09472	0.000128629	369.896	351.591	306.843	1023.24	512.563	662.48	up	Similar to NSMAF: Protein FAN (Homo sapiens OX%3D9606)
ANN06702	1.01592	0.00908036	42.4495	64.8934	66.3795	108.136	132.887	107.757	up	Similar to Nfat5: Nuclear factor of activated T-cells 5 (Rattus norvegicus OX%3D10116)		ANN06748	1.67895	2.66148e-07	61.4631	123.12	143.193	305.22	370.334	368.316	up	Similar to X-element\ORF2: Probable RNA-directed DNA polymerase from transposon X-element (Drosophila melanogaster OX%3D7227)
ANN06704	3.94476	1.95082e-11	3.85905	9.27048	3.08742	82.7575	74.417	100.465	up	Protein of unknown function		ANN06760	1.90741	1.30605e-07	30.1728	36.8092	30.6843	113.959	130.824	121.414	up	Protein of unknown function
ANN06705	2.32493	3.03163e-16	174.622	130.817	142.021	932.401	584.705	729.99	up	Similar to aroQ: Monofunctional chorismate mutase (Pseudomonas aeruginosa (strain ATCC 15692 / DSM 22644 / CIP 104116 / JCM 14847 / LMG 12228 / 1C / PRS 101 / PAO1) OX%3D208964)		ANN06788	2.24229	2.84265e-11	32.4078	59.6563	35.0678	193.651	208.648	198.826	up	Similar to TAF1B: TATA box-binding protein-associated factor RNA polymerase I subunit B (Drosophila melanogaster OX%3D7227)
ANN06706	1.73621	7.59353e-10	84.899	93.7349	87.9915	297.927	261.124	329.751	up	Similar to Phf5a: PHD finger-like domain-containing protein 5A (Rattus norvegicus OX%3D10116)		ANN06790	1.01267	0.00243606	70.4032	57.1177	87.6694	137.867	135.521	159.712	up	Similar to RAB1A: Ras-related protein Rab-1A (Lymnaea stagnalis OX%3D6523)
ANN06707	1.47896	3.1323e-12	426.425	418.202	390.559	1171.85	1130.87	1143.19	up	Similar to ncm: Pre-mRNA-splicing factor CWC22 homolog (Drosophila melanogaster OX%3D7227)		ANN06792	1.33456	1.11928e-08	177.684	138.352	160.727	378.536	377.043	448.172	up	Similar to Pde12: 2'%2C5'-phosphodiesterase 12 (Rattus norvegicus OX%3D10116)
ANN06711	2.06089	5.81752e-05	15.4362	24.7213	10.806	55.1716	85.048	75.3486	up	Similar to CG1139: Proton-coupled amino acid transporter-like protein CG1139 (Drosophila melanogaster OX%3D7227)		ANN06817	6.98757	1.31038e-05	0	0	0	65.3473	9.39252	14.6675	up	Similar to CYP4C1: Cytochrome P450 4C1 (Blaberus discoidalis OX%3D6981)
ANN06712	1.23831	0.00060687	53.0619	98.8851	84.9041	206.342	163.452	187.966	up	Similar to CG1139: Proton-coupled amino acid transporter-like protein CG1139 (Drosophila melanogaster OX%3D7227)		ANN06818	5.01587	0.0161178	0	0	0	10.3599	2.68358	9.77831	up	Protein of unknown function
ANN06720	1.20146	3.60106e-05	153.397	125.667	183.702	407.167	319.594	334.612	up	Similar to MTG2: Mitochondrial ribosome-associated GTPase 2 (Pongo abelii OX%3D9601)		ANN06830	6.10987	3.1803e-64	16.7627	8.88498	14.6116	739.54	1206.27	846.638	up	Similar to Probable salivary secreted peptide (Bombus ignitus OX%3D130704)
ANN06722	3.36435	1.4228e-30	107.089	75.1939	123.497	1164.12	800.647	1169.12	up	Similar to Btbd9: BTB/POZ domain-containing protein 9 (Mus musculus OX%3D10090)		ANN06831	7.32418	3.71807e-38	24.5852	86.3112	102.281	10131.2	12855	11047.9	up	Similar to Probable salivary secreted peptide (Bombus ignitus OX%3D130704)
ANN06724	2.4143	3.15818e-12	3488.58	6934.32	7124.22	43336.2	21875.9	28317.3	up	Similar to RPS12: 40S ribosomal protein S12 (Gallus gallus OX%3D9031)		ANN06832	8.87229	1.128e-45	16.7627	22.8471	2.92231	8162.04	5383.26	6642.73	up	Similar to Probable salivary secreted peptide (Bombus ignitus OX%3D130704)
ANN06748	1.74004	1.01187e-09	92.6171	78.2841	97.2537	318.892	312.285	262.505	up	Similar to X-element\ORF2: Probable RNA-directed DNA polymerase from transposon X-element (Drosophila melanogaster OX%3D7227)		ANN06839	1.32432	1.89454e-10	277.143	270.357	246.936	690.131	733.959	566.327	up	Similar to ZMYM1: Zinc finger MYM-type protein 1 (Homo sapiens OX%3D9606)
ANN06760	1.33631	0.000742492	42.4495	53.5628	33.9616	93.7918	107.639	128.822	up	Protein of unknown function		ANN06840	1.04242	3.21958e-06	272.673	211.97	236.707	557.046	452.183	478.322	up	Similar to Top1: DNA topoisomerase 1 (Drosophila melanogaster OX%3D7227)
ANN06788	2.28052	1.24285e-11	43.4143	35.0218	40.1365	162.205	207.969	204.98	up	Similar to TAF1B: TATA box-binding protein-associated factor RNA polymerase I subunit B (Drosophila melanogaster OX%3D7227)		ANN06841	1.22829	0.0319623	16.7627	27.9242	18.995	62.9566	50.988	35.0389	up	Similar to RNMT: mRNA cap guanine-N7 methyltransferase (Homo sapiens OX%3D9606)
ANN06792	1.72019	7.77192e-10	104.194	111.246	146.652	430.339	405.307	350.816	up	Similar to Pde12: 2'%2C5'-phosphodiesterase 12 (Rattus norvegicus OX%3D10116)		ANN06844	1.28348	0.000661831	41.3479	39.3478	37.9901	90.8487	92.5834	105.932	up	Similar to Yrdc: YrdC domain-containing protein%2C mitochondrial (Rattus norvegicus OX%3D10116)
ANN06817	3.37236	2.75373e-05	5.78857	4.12021	0	46.3442	33.8863	31.5978	up	Similar to CYP4C1: Cytochrome P450 4C1 (Blaberus discoidalis OX%3D6981)		ANN06867	3.204	3.76192e-07	4.47004	7.61569	7.30579	52.5966	75.8111	48.0767	up	Similar to Pex6: Peroxisome assembly factor 2 (Mus musculus OX%3D10090)
ANN06830	6.52733	2.17423e-46	31.8371	8.24043	13.8934	2472.79	965.427	1626.88	up	Similar to Probable salivary secreted peptide (Bombus ignitus OX%3D130704)		ANN06868	10.2309	4.24691e-16	0	0	0	215.965	278.421	351.204	up	Protein of unknown function
ANN06831	6.94611	7.3993e-66	207.424	72.1037	115.778	25209	10165.9	13474.4	up	Similar to Probable salivary secreted peptide (Bombus ignitus OX%3D130704)		ANN06870	1.99647	1.35479e-08	53.6405	53.3099	92.0529	346.66	193.888	249.347	up	Protein of unknown function
ANN06832	9.00599	1.67258e-110	18.3305	19.571	3.08742	9854.76	5249.72	7180.8	up	Similar to Probable salivary secreted peptide (Bombus ignitus OX%3D130704)		ANN06879	3.63094	7.30021e-08	2.23502	12.6928	2.92231	58.175	65.7477	96.9682	up	Similar to CDC6: Cell division control protein 6 homolog (Homo sapiens OX%3D9606)
ANN06841	1.31056	0.00694609	20.26	24.7213	38.5928	70.6197	76.4103	56.714	up	Similar to RNMT: mRNA cap guanine-N7 methyltransferase (Homo sapiens OX%3D9606)		ANN06883	1.98475	0.0076096	6.70507	7.61569	7.30579	29.486	23.4813	32.5944	up	Similar to chinmo: Zinc finger protein chinmo (Drosophila melanogaster OX%3D7227)
ANN06844	1.27754	0.00236666	28.9429	44.2923	54.0299	86.0678	104.317	114.238	up	Similar to Yrdc: YrdC domain-containing protein%2C mitochondrial (Rattus norvegicus OX%3D10116)		ANN06887	1.60815	0.00355101	15.6452	31.7321	11.6893	54.1905	59.7096	66.8184	up	Similar to nsun2: RNA cytosine-C(5)-methyltransferase NSUN2 (Xenopus tropicalis OX%3D8364)
ANN06847	1.07863	0.0360604	84.899	66.9535	49.3987	226.204	69.1015	133.683	up	Similar to brn: Beta-1%2C3-galactosyltransferase brn (Drosophila melanogaster OX%3D7227)		ANN06914	1.50112	0.00245374	51.4055	15.2314	45.2959	82.0826	124.115	110.821	up	Similar to CG1139: Proton-coupled amino acid transporter-like protein CG1139 (Drosophila melanogaster OX%3D7227)
ANN06850	5.12048	0.0109443	0	0	0	13.2412	2.65775	6.4816	up	Similar to At1g75220: Sugar transporter ERD6-like 6 (Arabidopsis thaliana OX%3D3702)		ANN06928	2.6071	0.000522314	20.1152	0	14.6116	53.3935	97.9506	61.1144	up	Similar to wat: Fatty acyl-CoA reductase wat (Drosophila melanogaster OX%3D7227)
ANN06857	1.43291	0.0400251	22.1895	21.6311	4.63113	45.2407	60.4638	28.357	up	Similar to Rnmt: mRNA cap guanine-N7 methyltransferase (Drosophila melanogaster OX%3D7227)		ANN06930	6.74323	6.75287e-05	0	0	0	52.5966	3.35447	19.5566	up	Similar to wat: Fatty acyl-CoA reductase wat (Drosophila melanogaster OX%3D7227)
ANN06866	1.60665	4.01986e-05	59.8152	35.0218	61.7484	116.964	177.405	179.054	up	Similar to Rpap1: RNA polymerase II-associated protein 1 (Mus musculus OX%3D10090)		ANN06954	1.98126	0.000176586	22.3502	19.0392	16.0727	105.99	44.9499	77.4116	up	Similar to paf1: RNA polymerase II-associated factor 1 homolog (Danio rerio OX%3D7955)
ANN06867	2.96213	9.3254e-06	1.92952	10.3005	7.71855	60.6888	48.5039	43.7508	up	Similar to Pex6: Peroxisome assembly factor 2 (Mus musculus OX%3D10090)		ANN06964	3.87227	0.0348879	2.23502	0	0	2.39076	9.39252	23.6309	up	Similar to Low-temperature-induced cysteine proteinase (Fragment) (Solanum lycopersicum OX%3D4081)
ANN06868	5.99905	4.28001e-16	5.78857	0	0	124.688	149.498	149.077	up	Protein of unknown function		ANN06966	7.86704	0.000370957	0	0	0	5.57843	50.3171	108.376	up	Similar to CG12163: Putative cysteine proteinase CG12163 (Drosophila melanogaster OX%3D7227)
ANN06869	1.37904	0.000115993	70.4276	72.1037	55.5736	166.618	133.552	217.944	up	Similar to pex6: Peroxisomal biogenesis factor 6 (Dictyostelium discoideum OX%3D44689)		ANN07001	1.99663	7.38301e-05	16.7627	11.4235	27.762	74.9103	83.1909	62.7441	up	Similar to UGT2B18: UDP-glucuronosyltransferase 2B18 (Macaca fascicularis OX%3D9541)
ANN06870	3.11853	2.56906e-19	36.661	56.6529	24.6994	390.615	342.85	307.876	up	Protein of unknown function		ANN07009	1.94334	2.89593e-10	55.8755	58.387	52.6017	173.728	212.003	256.681	up	Similar to MANBA: Beta-mannosidase (Capra hircus OX%3D9925)
ANN06876	1.25812	5.67535e-06	126.384	162.748	166.721	407.167	336.205	345.145	up	Similar to Nsun2: tRNA (cytosine(34)-C(5))-methyltransferase (Drosophila melanogaster OX%3D7227)		ANN07021	3.86194	3.11184e-52	49.1705	38.0785	35.0678	588.923	623.261	580.179	up	Protein of unknown function
ANN06879	2.81259	4.83946e-07	10.6124	11.3306	7.71855	100.412	50.4972	61.5752	up	Similar to CDC6: Cell division control protein 6 homolog (Homo sapiens OX%3D9606)		ANN07031	1.12469	3.50215e-11	2059.57	2001.66	1868.82	4941.69	3848.92	4142.74	up	Similar to UBA1: Ubiquitin-like modifier-activating enzyme 1 (Homo sapiens OX%3D9606)
ANN06887	2.0326	0.000662606	18.3305	35.0218	6.17484	77.2403	57.806	114.238	up	Similar to nsun2: RNA cytosine-C(5)-methyltransferase NSUN2 (Xenopus tropicalis OX%3D8364)		ANN07038	1.07397	0.00982322	64.8156	39.3478	36.5289	112.366	86.5454	99.4128	up	Similar to Eif2ak4: eIF-2-alpha kinase GCN2 (Rattus norvegicus OX%3D10116)
ANN06914	1.46492	0.000528672	39.5552	33.9918	23.1557	97.1021	79.7325	93.9831	up	Similar to CG1139: Proton-coupled amino acid transporter-like protein CG1139 (Drosophila melanogaster OX%3D7227)		ANN07052	2.8084	1.96944e-14	30.1728	34.2706	30.6843	156.993	299.219	209.419	up	Similar to MANBA: Beta-mannosidase (Homo sapiens OX%3D9606)
ANN06928	1.98787	0.0028576	16.401	20.6011	3.08742	59.5854	70.4303	34.0284	up	Similar to wat: Fatty acyl-CoA reductase wat (Drosophila melanogaster OX%3D7227)		ANN07053	2.96129	1.19172e-10	17.8802	15.2314	20.4562	80.4888	169.065	166.231	up	Similar to MANBA: Beta-mannosidase (Bos taurus OX%3D9913)
ANN06930	2.78166	4.29869e-06	7.7181	6.18032	7.71855	55.1716	52.4905	40.51	up	Similar to wat: Fatty acyl-CoA reductase wat (Drosophila melanogaster OX%3D7227)		ANN07054	3.53977	0.021811	0	3.80785	0	4.78151	16.7724	22.816	up	Similar to Manba: Beta-mannosidase (Mus musculus OX%3D10090)
ANN06962	5.13884	0.0144625	0	0	0	17.6549	2.65775	2.4306	up	Similar to Low-temperature-induced cysteine proteinase (Fragment) (Solanum lycopersicum OX%3D4081)		ANN07066	2.79547	0.00221552	6.70507	2.53856	2.92231	43.0336	14.7597	28.5201	up	Similar to UGT2B18: UDP-glucuronosyltransferase 2B18 (Macaca fascicularis OX%3D9541)
ANN06964	5.23817	0.00752932	0	0	0	15.4481	3.98662	4.8612	up	Similar to Low-temperature-induced cysteine proteinase (Fragment) (Solanum lycopersicum OX%3D4081)		ANN07068	2.47243	1.10545e-18	72.6382	60.9256	64.2909	296.454	352.22	451.432	up	Similar to UGT2B18: UDP-glucuronosyltransferase 2B18 (Macaca fascicularis OX%3D9541)
ANN06966	5.56022	3.54511e-06	2.89429	0	0	107.033	20.5976	27.5468	up	Similar to CG12163: Putative cysteine proteinase CG12163 (Drosophila melanogaster OX%3D7227)		ANN07071	2.64781	2.81771e-30	94.9884	101.543	111.048	664.63	535.374	724.409	up	Similar to CG3817: RRP15-like protein (Drosophila melanogaster OX%3D7227)
ANN06972	1.58883	1.8048e-05	79.1105	79.3141	41.6802	237.238	161.458	210.652	up	Similar to Bub3: Mitotic checkpoint protein BUB3 (Mus musculus OX%3D10090)		ANN07079	1.07579	0.00625688	36.8779	53.3099	40.9124	86.0672	98.6215	91.2642	up	Similar to X-element\ORF2: Probable RNA-directed DNA polymerase from transposon X-element (Drosophila melanogaster OX%3D7227)
ANN06994	2.02125	0.0328139	3.85905	6.18032	3.08742	26.4824	11.9599	16.204	up	Protein of unknown function		ANN07085	2.57976	1.03214e-20	109.516	102.812	56.9851	478.948	605.818	535.362	up	Similar to Mcm5: DNA replication licensing factor Mcm5 (Drosophila melanogaster OX%3D7227)
ANN07001	2.31944	3.44879e-05	39.5552	10.3005	15.4371	158.894	93.0212	79.3996	up	Similar to UGT2B18: UDP-glucuronosyltransferase 2B18 (Macaca fascicularis OX%3D9541)		ANN07093	1.5888	0.00628982	21.2327	10.1543	16.0727	39.049	48.9753	55.4104	up	Similar to Smg8: Protein SMG8 (Mus musculus OX%3D10090)
ANN07005	4.94357	0.0144789	0	0	0	8.82746	5.97993	4.8612	up	Similar to DIEXF: Digestive organ expansion factor homolog (Homo sapiens OX%3D9606)		ANN07110	4.29466	0.000136578	0	0	5.84463	25.5014	56.3551	22.816	up	Similar to pol: Retrovirus-related Pol polyprotein from transposon 297 (Drosophila melanogaster OX%3D7227)
ANN07011	2.96541	0.000183915	1.92952	7.21037	3.08742	30.8961	29.2352	36.459	up	Protein of unknown function		ANN07136	1.33549	0.0358474	32.4078	10.1543	29.2231	90.0518	36.8992	54.5955	up	Similar to CPIJ007479: DDRGK domain-containing protein 1 (Culex quinquefasciatus OX%3D7176)
ANN07021	2.68208	3.48863e-17	104.194	90.6447	54.0299	428.132	599.987	584.154	up	Protein of unknown function		ANN07137	1.50699	1.70697e-16	4838.82	4283.83	4507.67	14730.2	10364	13648.1	up	Similar to Parcxpwex01: 40S ribosomal protein S3a (Periplaneta americana OX%3D6978)
ANN07026	2.19542	4.21602e-05	13.5067	12.3606	9.26226	59.5854	55.1483	48.612	up	Similar to mas: Protein masquerade (Drosophila melanogaster OX%3D7227)		ANN07142	4.2452	2.27554e-31	20.1152	12.6928	45.2959	444.68	435.411	572.846	up	Protein of unknown function
ANN07031	1.34952	1.44762e-09	1682.54	2268.18	1880.24	4791.11	4771.99	5296.27	up	Similar to UBA1: Ubiquitin-like modifier-activating enzyme 1 (Homo sapiens OX%3D9606)		ANN07144	2.10482	2.93309e-10	36.8779	45.6942	32.1455	184.088	154.977	155.638	up	Protein of unknown function
ANN07055	1.44026	0.0342843	6.75333	12.3606	24.6994	35.3099	47.175	32.408	up	Similar to DIEXF: Digestive organ expansion factor homolog (Homo sapiens OX%3D9606)		ANN07147	1.46507	6.86045e-15	576.636	460.749	615.147	1450.39	1461.21	1649.27	up	Similar to ALDH18A1: Delta-1-pyrroline-5-carboxylate synthase (Homo sapiens OX%3D9606)
ANN07066	1.133	0.0174499	65.6038	36.0519	33.9616	81.654	135.545	81.8302	up	Similar to UGT2B18: UDP-glucuronosyltransferase 2B18 (Macaca fascicularis OX%3D9541)		ANN07148	1.61525	8.006e-08	67.0507	66.0027	89.1306	183.291	254.269	240.383	up	Similar to ALDH18A1: Delta-1-pyrroline-5-carboxylate synthase (Pongo abelii OX%3D9601)
ANN07068	2.86818	5.2934e-17	54.9914	27.8114	57.1173	377.374	301.654	335.423	up	Similar to UGT2B18: UDP-glucuronosyltransferase 2B18 (Macaca fascicularis OX%3D9541)		ANN07166	1.28773	0.00144373	81.5783	60.9256	49.6793	216.762	103.318	151.564	up	Similar to Prpf3: U4/U6 small nuclear ribonucleoprotein Prp3 (Mus musculus OX%3D10090)
ANN07071	2.82488	4.78854e-24	71.3924	96.825	80.2729	683.025	495.67	584.154	up	Similar to CG3817: RRP15-like protein (Drosophila melanogaster OX%3D7227)		ANN07209	1.36012	5.26918e-06	65.9331	93.9269	113.97	240.669	240.851	217.567	up	Similar to Hmt4-20: Histone-lysine N-methyltransferase Suv4-20 (Drosophila melanogaster OX%3D7227)
ANN07072	1.03078	0.000393767	503.606	409.961	359.684	643.301	975.394	984.392	up	Similar to KTN1: Kinectin (Vulpes vulpes OX%3D9627)		ANN07211	1.82303	2.48671e-10	88.2834	53.3099	83.286	274.14	267.687	254.236	up	Similar to neur: Protein neuralized (Drosophila melanogaster OX%3D7227)
ANN07085	2.5869	1.69953e-15	62.7095	105.065	63.2921	579.302	404.642	411.581	up	Similar to Mcm5: DNA replication licensing factor Mcm5 (Drosophila melanogaster OX%3D7227)		ANN07212	1.43132	0.0412212	14.5276	7.61569	14.6116	44.6274	26.8358	27.7052	up	Similar to SECISBP2L: Selenocysteine insertion sequence-binding protein 2-like (Homo sapiens OX%3D9606)
ANN07137	2.27279	8.21981e-16	2944.45	4264.42	4061.5	22859.8	12834.9	18767.5	up	Similar to Parcxpwex01: 40S ribosomal protein S3a (Periplaneta americana OX%3D6978)		ANN07215	1.22387	0.000310989	72.6382	91.3883	58.4463	137.07	175.103	208.604	up	Similar to DNApol-iota: DNA polymerase iota (Drosophila melanogaster OX%3D7227)
ANN07142	1.90964	7.95377e-10	97.441	99.9152	72.5544	418.201	271.755	331.372	up	Protein of unknown function		ANN07216	1.20414	0.000907181	61.4631	58.387	55.524	106.787	122.774	175.195	up	Similar to POLI: DNA polymerase iota (Homo sapiens OX%3D9606)
ANN07144	1.55775	7.3306e-05	43.4143	96.825	108.06	237.238	279.728	208.221	up	Protein of unknown function		ANN07218	4.06295	3.45702e-20	20.1152	6.34641	7.30579	200.823	179.129	201.27	up	Protein of unknown function
ANN07166	1.00005	0.00847504	82.9695	69.0136	50.9424	163.308	116.277	130.442	up	Similar to Prpf3: U4/U6 small nuclear ribonucleoprotein Prp3 (Mus musculus OX%3D10090)		ANN07222	5.67269	3.9356e-22	4.47004	3.80785	5.84463	134.679	328.067	250.162	up	Similar to CTSF: Cathepsin F (Homo sapiens OX%3D9606)
ANN07168	1.60168	0.0222435	9.64762	8.24043	9.26226	33.103	25.2486	24.306	up	Similar to ZEU1: Thymidylate kinase (Arabidopsis thaliana OX%3D3702)		ANN07244	4.60505	0.0487243	0	0	0	8.7661	6.70894	1.62972	up	Similar to X-element\ORF2: Probable RNA-directed DNA polymerase from transposon X-element (Drosophila melanogaster OX%3D7227)
ANN07209	1.36356	3.27387e-06	95.5114	91.6748	123.497	285.789	242.52	267.366	up	Similar to Hmt4-20: Histone-lysine N-methyltransferase Suv4-20 (Drosophila melanogaster OX%3D7227)		ANN07261	1.09977	0.0101384	59.2281	134.544	61.3686	173.728	237.497	135.267	up	Similar to EIF2B2: Translation initiation factor eIF-2B subunit beta (Bos taurus OX%3D9913)
ANN07211	1.70286	9.40246e-06	87.7933	86.5245	37.049	239.445	263.117	193.638	up	Similar to neur: Protein neuralized (Drosophila melanogaster OX%3D7227)		ANN07265	2.3612	0.0428105	8.94009	2.53856	5.84463	1.59384	50.3171	37.4835	up	Similar to pol: RNA-directed DNA polymerase from mobile element jockey (Drosophila melanogaster OX%3D7227)
ANN07212	1.30892	0.0070687	31.8371	20.6011	29.3305	86.0678	53.8194	63.1956	up	Similar to SECISBP2L: Selenocysteine insertion sequence-binding protein 2-like (Homo sapiens OX%3D9606)		ANN07272	3.88055	3.26868e-16	17.8802	17.77	1.46116	203.214	156.318	203.715	up	Similar to DHFR: Dihydrofolate reductase (Heliothis virescens OX%3D7102)
ANN07215	1.09317	0.000820537	74.2867	64.8934	71.0107	161.101	143.518	144.216	up	Similar to DNApol-iota: DNA polymerase iota (Drosophila melanogaster OX%3D7227)		ANN07302	1.20166	0.000371709	67.0507	55.8484	65.7521	129.101	176.445	127.933	up	Similar to RRP36: Ribosomal RNA processing protein 36 homolog (Bos taurus OX%3D9913)
ANN07218	3.07945	1.34444e-19	31.8371	26.7814	24.6994	255.996	203.318	251.162	up	Protein of unknown function		ANN07304	1.61753	7.6888e-13	181.037	152.314	146.116	486.12	439.436	549.215	up	Similar to noc4l-b: Nucleolar complex protein 4 homolog B (Xenopus laevis OX%3D8355)
ANN07222	4.89762	0.00237075	24.119	18.541	0	943.435	172.089	166.901	up	Similar to CTSF: Cathepsin F (Homo sapiens OX%3D9606)		ANN07305	2.18846	1.66042e-14	49.1705	63.4641	81.8248	317.97	285.13	277.052	up	Protein of unknown function
ANN07244	3.43663	0.00764619	1.92952	2.06011	0	6.6206	25.2486	14.5836	up	Similar to X-element\ORF2: Probable RNA-directed DNA polymerase from transposon X-element (Drosophila melanogaster OX%3D7227)		ANN07310	1.35385	9.04367e-15	693.974	720.952	677.977	1934.12	1545.74	1870.92	up	Protein of unknown function
ANN07261	1.3675	5.69653e-05	81.04	91.6748	111.147	307.858	180.727	242.25	up	Similar to EIF2B2: Translation initiation factor eIF-2B subunit beta (Bos taurus OX%3D9913)		ANN07311	1.22768	0.00024453	68.1682	114.235	140.271	275.734	205.294	271.348	up	Similar to TAF12: Transcription initiation factor TFIID subunit 12 (Bos taurus OX%3D9913)
ANN07272	3.93765	2.74277e-22	15.4362	19.571	10.806	300.134	184.714	232.527	up	Similar to DHFR: Dihydrofolate reductase (Heliothis virescens OX%3D7102)		ANN07324	1.63702	4.80928e-06	56.9931	74.8877	73.0579	299.641	154.306	182.528	up	Similar to L-asparaginase (Dirofilaria immitis OX%3D6287)
ANN07299	2.36345	5.74729e-07	19.2952	38.112	83.3604	253.79	187.371	268.986	up	Similar to TIE1: Tyrosine-protein kinase receptor Tie-1 (Bos taurus OX%3D9913)		ANN07325	4.71564	0.0311001	0	0	0	7.96918	4.02537	6.51887	up	Protein of unknown function
ANN07304	1.98429	2.38737e-10	149.538	186.44	98.7975	703.99	510.952	516.097	up	Similar to noc4l-b: Nucleolar complex protein 4 homolog B (Xenopus laevis OX%3D8355)		ANN07326	2.87854	9.15697e-36	99.4585	105.35	78.9025	799.309	653.451	640.479	up	Similar to ccnj: Cyclin-J (Xenopus laevis OX%3D8355)
ANN07305	1.99191	6.68717e-12	78.1457	115.366	108.06	430.339	342.85	423.734	up	Protein of unknown function		ANN07327	1.26141	1.27624e-06	289.435	239.894	271.775	845.53	495.12	580.994	up	Similar to SNIP1: Smad nuclear-interacting protein 1 (Homo sapiens OX%3D9606)
ANN07306	2.04706	5.54709e-11	135.067	200.86	188.333	931.297	516.932	717.027	up	Similar to elp6: Elongator complex protein 6 (Xenopus laevis OX%3D8355)		ANN07329	2.38166	2.76609e-06	69.2857	76.1569	81.8248	616.018	97.9506	470.174	up	Similar to dalrd3: DALR anticodon-binding domain-containing protein 3 (Danio rerio OX%3D7955)
ANN07307	1.49552	2.14431e-10	920.383	1084.65	1140.8	3410.71	2479.02	2978.29	up	Similar to PSMA3: Proteasome subunit alpha type-3 (Homo sapiens OX%3D9606)		ANN07335	1.65909	0.00718385	764.377	647.334	986.281	4041.17	1066.72	2464.95	up	Similar to CYP6K1: Cytochrome P450 6k1 (Blattella germanica OX%3D6973)
ANN07310	1.68925	1.15294e-11	642.531	615.972	628.29	2470.59	1577.37	2039.27	up	Protein of unknown function		ANN07337	3.27763	7.58652e-07	8.94009	3.80785	8.76694	109.975	40.2537	58.6698	up	Similar to Tf2-9: Transposon Tf2-9 polyprotein (Schizosaccharomyces pombe (strain 972 / ATCC 24843) OX%3D284812)
ANN07311	1.86195	8.36808e-11	83.9343	86.5245	80.2729	332.133	255.808	325.7	up	Similar to TAF12: Transcription initiation factor TFIID subunit 12 (Bos taurus OX%3D9913)		ANN07372	1.41739	1.74355e-07	162.039	118.043	151.96	478.151	360.27	316.165	up	Similar to shu: Inactive peptidyl-prolyl cis-trans isomerase shutdown (Drosophila melanogaster OX%3D7227)
ANN07324	1.18355	0.00178995	77.181	87.5545	129.672	300.134	172.089	193.638	up	Similar to L-asparaginase (Dirofilaria immitis OX%3D6287)		ANN07377	1.25529	4.3961e-17	7802.46	7860.67	7221.04	18547.5	16579.1	19504.5	up	Similar to RPS27: 40S ribosomal protein S27 (Homarus americanus OX%3D6706)
ANN07325	5.46447	0.00415523	0	0	0	17.6549	2.65775	8.102	up	Protein of unknown function		ANN07395	1.90788	2.76194e-27	405.656	332.552	395.974	1436.84	1349.17	1470.82	up	Similar to C-1-tetrahydrofolate synthase%2C cytoplasmic (Spodoptera frugiperda OX%3D7108)
ANN07326	3.91212	4.46578e-39	64.639	38.112	37.049	745.921	679.055	705.684	up	Similar to ccnj: Cyclin-J (Xenopus laevis OX%3D8355)		ANN07396	1.24178	9.84531e-17	1199.09	1179.16	1154.31	2719.09	2703.7	2932.68	up	Similar to Psma2: Proteasome subunit alpha type-2 (Rattus norvegicus OX%3D10116)
ANN07327	1.71353	5.50227e-14	269.169	249.273	225.382	839.712	780.049	824.783	up	Similar to SNIP1: Smad nuclear-interacting protein 1 (Homo sapiens OX%3D9606)		ANN07398	1.0386	0.000179604	108.399	115.505	93.5141	245.451	195.23	212.678	up	Similar to Zpr1: Zinc finger protein ZPR1 (Mus musculus OX%3D10090)
ANN07330	1.11655	1.89469e-05	201.635	229.702	191.42	419.304	512.946	418.873	up	Protein of unknown function		ANN07401	4.86731	1.09368e-70	24.5852	26.6549	32.1455	915.659	755.427	744.781	up	Similar to TP63: Tumor protein 63 (Homo sapiens OX%3D9606)
ANN07337	3.51923	6.97292e-06	5.78857	4.12021	3.08742	17.6549	65.1148	68.867	up	Similar to Tf2-9: Transposon Tf2-9 polyprotein (Schizosaccharomyces pombe (strain 972 / ATCC 24843) OX%3D284812)		ANN07403	1.00486	0.0205074	45.8179	50.7713	74.519	159.384	86.5454	96.1533	up	Similar to PYROXD2: Pyridine nucleotide-disulfide oxidoreductase domain-containing protein 2 (Bos taurus OX%3D9913)
ANN07343	6.02858	2.84328e-06	0	2.06011	0	18.7584	65.1148	61.5752	up	Protein of unknown function		ANN07423	2.46698	1.28831e-24	117.339	102.812	113.97	582.547	749.389	514.991	up	Similar to AGO3: Piwi-like protein Ago3 (Bombyx mori OX%3D7091)
ANN07372	1.02277	0.00116858	236.367	152.448	168.264	408.27	302.983	423.734	up	Similar to shu: Inactive peptidyl-prolyl cis-trans isomerase shutdown (Drosophila melanogaster OX%3D7227)		ANN07424	3.86533	0.00150103	2.23502	2.53856	0	7.96918	38.9119	25.2606	up	Protein of unknown function
ANN07377	1.98813	7.93024e-14	5348.64	6294.66	6813.94	31917.9	18505.2	22798.2	up	Similar to RPS27: 40S ribosomal protein S27 (Homarus americanus OX%3D6706)		ANN07433	1.58432	2.34758e-26	7513.03	7392.3	8186.86	24082.9	20929.2	24231.5	up	Similar to RpS25: 40S ribosomal protein S25 (Spodoptera frugiperda OX%3D7108)
ANN07394	1.21351	0.00335996	44.379	56.6529	29.3305	111.447	99.0011	95.6035	up	Similar to PcgF3: Polycomb group RING finger protein 3 (Mus musculus OX%3D10090)		ANN07435	6.04172	6.39289e-219	118.456	101.543	105.203	6172.93	7791.77	7499.96	up	Similar to acp7: Acid phosphatase type 7 (Danio rerio OX%3D7955)
ANN07396	1.66882	5.67054e-11	787.246	1072.29	1086.77	3569.61	2516.89	3278.07	up	Similar to Psma2: Proteasome subunit alpha type-2 (Rattus norvegicus OX%3D10116)		ANN07436	1.74789	9.84197e-07	78.2258	57.1177	116.893	353.035	193.218	298.238	up	Similar to Polr1c: DNA-directed RNA polymerases I and III subunit RPAC1 (Mus musculus OX%3D10090)
ANN07401	4.80971	1.63233e-51	24.119	19.571	30.8742	630.06	801.311	623.854	up	Similar to TP63: Tumor protein 63 (Homo sapiens OX%3D9606)		ANN07437	1.1541	0.000112526	222.385	182.777	182.645	584.938	299.89	425.356	up	Similar to POLR1C: DNA-directed RNA polymerases I and III subunit RPAC1 (Bos taurus OX%3D9913)
ANN07404	1.77356	0.0130957	11.5771	4.12021	12.3497	26.4824	30.5641	37.2692	up	Similar to Tf2-6: Transposon Tf2-6 polyprotein (Schizosaccharomyces pombe (strain 972 / ATCC 24843) OX%3D284812)		ANN07438	1.01966	8.66728e-06	196.682	157.391	188.489	343.472	381.068	375.65	up	Similar to SLC30A7: Zinc transporter 7 (Gallus gallus OX%3D9031)
ANN07423	1.89716	2.50149e-11	134.102	181.289	132.759	441.373	621.913	607.65	up	Similar to AGO3: Piwi-like protein Ago3 (Bombyx mori OX%3D7091)		ANN07450	2.45877	0.00251098	7.82258	3.80785	4.38347	19.923	30.1903	39.1132	up	Protein of unknown function
ANN07424	2.66108	0.0327512	1.92952	4.12021	0	7.72403	20.5976	12.153	up	Protein of unknown function		ANN07451	3.00157	1.02616e-21	48.053	55.8484	32.1455	283.703	365.637	446.543	up	Similar to CG3430: Mini-chromosome maintenance complex-binding protein (Drosophila melanogaster OX%3D7227)
ANN07425	1.45168	2.19114e-09	590.434	738.548	745.612	2241.07	1699.63	1732.21	up	Similar to PAOX: Peroxisomal N(1)-acetyl-spermine/spermidine oxidase (Homo sapiens OX%3D9606)		ANN07474	1.89796	2.06586e-07	53.6405	86.3112	131.504	431.133	240.851	334.092	up	Similar to Tcerg1: Transcription elongation regulator 1 (Mus musculus OX%3D10090)
ANN07433	2.26799	1.43221e-14	4056.82	5974.31	6673.46	35305.4	20123.1	25021.4	up	Similar to RpS25: 40S ribosomal protein S25 (Spodoptera frugiperda OX%3D7108)		ANN07476	1.92919	7.68685e-05	136.336	128.198	81.8248	662.239	127.47	532.103	up	Similar to TCERG1: Transcription elongation regulator 1 (Homo sapiens OX%3D9606)
ANN07435	4.98894	2.29541e-69	189.093	157.598	165.177	7508.86	4382.63	4378.32	up	Similar to acp7: Acid phosphatase type 7 (Danio rerio OX%3D7955)		ANN07479	1.58871	0.00980044	11.1751	26.6549	14.6116	66.9412	32.8738	57.855	up	Similar to Sec10: Exocyst complex component 5 (Drosophila melanogaster OX%3D7227)
ANN07436	2.1036	4.60547e-07	34.7314	108.156	97.2537	375.167	266.439	385.655	up	Similar to Polr1c: DNA-directed RNA polymerases I and III subunit RPAC1 (Mus musculus OX%3D10090)		ANN07480	2.51279	6.7632e-20	72.6382	55.8484	52.6017	295.657	357.587	385.428	up	Similar to PRMT1: Protein arginine N-methyltransferase 1 (Homo sapiens OX%3D9606)
ANN07437	1.99905	4.75576e-10	116.736	187.47	140.478	733.783	419.924	626.284	up	Similar to POLR1C: DNA-directed RNA polymerases I and III subunit RPAC1 (Bos taurus OX%3D9913)		ANN07481	2.35521	8.43003e-05	42.4654	12.6928	20.4562	193.651	48.3044	148.304	up	Similar to PUS1: tRNA pseudouridine synthase A (Homo sapiens OX%3D9606)
ANN07451	3.68122	2.87319e-23	44.379	19.571	37.049	558.337	392.018	343.525	up	Similar to CG3430: Mini-chromosome maintenance complex-binding protein (Drosophila melanogaster OX%3D7227)		ANN07487	1.86074	6.5687e-13	105.046	124.39	75.9802	357.019	373.017	382.984	up	Similar to Nup155: Nuclear pore complex protein Nup155 (Mus musculus OX%3D10090)
ANN07474	1.01767	0.00154233	160.15	134.937	138.934	222.893	372.085	282.76	up	Similar to Tcerg1: Transcription elongation regulator 1 (Mus musculus OX%3D10090)		ANN07489	1.55375	0.033924	282.73	389.67	222.096	291.672	1013.05	1321.7	up	Similar to PPP1R42: Protein phosphatase 1 regulatory subunit 42 (Homo sapiens OX%3D9606)
ANN07480	2.60463	1.12197e-13	54.0267	37.0819	33.9616	272.548	298.332	196.878	up	Similar to PRMT1: Protein arginine N-methyltransferase 1 (Homo sapiens OX%3D9606)		ANN07490	4.6458	6.30505e-07	8.94009	59.6563	8.76694	533.138	813.795	590.773	up	Protein of unknown function
ANN07481	1.62542	4.22451e-06	48.2381	54.5928	43.2239	177.653	150.827	124.771	up	Similar to PUS1: tRNA pseudouridine synthase A (Homo sapiens OX%3D9606)		ANN07491	4.20086	0.000203015	15.6452	20.3085	0	177.713	259.636	228.975	up	Protein of unknown function
ANN07487	1.36975	8.08374e-07	130.243	170.989	135.847	342.064	427.233	360.539	up	Similar to Nup155: Nuclear pore complex protein Nup155 (Mus musculus OX%3D10090)		ANN07492	2.48534	5.13465e-05	11.1751	7.61569	8.76694	51.7997	66.4186	36.6686	up	Protein of unknown function
ANN07490	2.76446	3.33596e-13	34.7314	53.5628	91.0789	383.995	316.937	499.083	up	Protein of unknown function		ANN07498	3.44068	7.86575e-45	48.053	71.0798	52.6017	657.458	608.501	596.477	up	Protein of unknown function
ANN07491	3.76312	8.16484e-14	5.78857	6.18032	15.4371	130.205	115.612	105.326	up	Protein of unknown function		ANN07502	1.12416	8.736e-05	100.576	92.6576	81.8248	204.808	221.395	174.38	up	Similar to NOVA1: RNA-binding protein Nova-1 (Macaca fascicularis OX%3D9541)
ANN07498	3.24852	3.75247e-26	58.8505	67.9835	100.341	567.164	707.626	859.622	up	Protein of unknown function		ANN07526	2.11415	7.98937e-24	279.378	242.433	302.46	1003.32	1407.54	1154.65	up	Similar to Tsr1: Pre-rRNA-processing protein TSR1 homolog (Drosophila melanogaster OX%3D7227)
ANN07526	2.43334	1.56143e-28	192.952	219.401	206.857	1132.12	1126.89	1084.86	up	Similar to Tsr1: Pre-rRNA-processing protein TSR1 homolog (Drosophila melanogaster OX%3D7227)		ANN07532	2.16057	3.17341e-44	1642.74	1457.14	1785.53	7548.41	7329.52	6959.71	up	Similar to HNRNP: Heterogeneous nuclear ribonucleoprotein A1%2C A2/B1 homolog (Schistocerca americana OX%3D7009)
ANN07532	2.18846	2.93171e-25	1620.8	1589.37	1262.75	6610.67	6853.01	6936.93	up	Similar to HNRNP: Heterogeneous nuclear ribonucleoprotein A1%2C A2/B1 homolog (Schistocerca americana OX%3D7009)		ANN07545	3.2418	2.78417e-21	35.7603	35.5399	20.4562	252.623	251.585	372.39	up	Similar to Mfsd6: Major facilitator superfamily domain-containing protein 6 (Mus musculus OX%3D10090)
ANN07538	1.33281	0.000462596	55.9562	45.3223	43.2239	151.17	110.961	104.516	up	Similar to cnc: Segmentation protein cap'n'collar (Drosophila melanogaster OX%3D7227)		ANN07546	3.67936	2.54409e-09	6.70507	5.07713	8.76694	129.898	50.988	80.671	up	Similar to Haspin: Putative serine/threonine-protein kinase haspin homolog (Drosophila melanogaster OX%3D7227)
ANN07539	1.17838	0.00482886	211.283	454.254	353.51	1201.64	573.409	532.301	up	Similar to APOD: Apolipoprotein D (Oryctolagus cuniculus OX%3D9986)		ANN07565	2.16742	9.26194e-16	59.2281	83.7726	96.4364	347.456	334.105	387.873	up	Similar to smc6: Structural maintenance of chromosomes protein 6 (Takifugu rubripes OX%3D31033)
ANN07545	3.35344	1.89502e-20	44.379	22.6612	21.6119	307.858	273.748	340.284	up	Similar to Mfsd6: Major facilitator superfamily domain-containing protein 6 (Mus musculus OX%3D10090)		ANN07573	1.77562	9.96153e-08	79.3433	54.5791	39.4512	205.605	188.521	204.53	up	Similar to SLC22A5: Solute carrier family 22 member 5 (Homo sapiens OX%3D9606)
ANN07546	1.75341	0.000180515	27.0133	14.4207	27.7868	83.8609	79.7325	68.0568	up	Similar to Haspin: Putative serine/threonine-protein kinase haspin homolog (Drosophila melanogaster OX%3D7227)		ANN07574	1.9439	0.00238129	14.5276	10.1543	11.6893	60.5658	53.6716	26.0755	up	Similar to slx1a: Structure-specific endonuclease subunit slx1 (Xenopus laevis OX%3D8355)
ANN07564	1.23454	0.000457859	85.8638	60.7731	52.4861	162.205	164.116	145.836	up	Similar to smc6: Structural maintenance of chromosomes protein 6 (Dictyostelium discoideum OX%3D44689)		ANN07583	1.33831	1.48552e-11	289.435	286.858	296.615	805.685	636.679	765.152	up	Similar to IDI1: Isopentenyl-diphosphate Delta-isomerase 1 (Bos taurus OX%3D9913)
ANN07565	1.63058	4.2916e-08	86.8286	95.795	98.7975	232.824	334.876	300.584	up	Similar to smc6: Structural maintenance of chromosomes protein 6 (Takifugu rubripes OX%3D31033)		ANN07584	1.06554	3.03482e-05	234.677	210.701	265.931	549.874	373.017	565.512	up	Similar to zcchc4: rRNA N6-adenosine-methyltransferase ZCCHC4 (Xenopus laevis OX%3D8355)
ANN07573	1.50659	3.42854e-06	56.921	60.7731	64.8358	175.446	150.163	192.017	up	Similar to SLC22A5: Solute carrier family 22 member 5 (Homo sapiens OX%3D9606)		ANN07586	1.40207	2.86862e-18	991.232	846.611	951.213	2547.75	2313.91	2510.58	up	Similar to DppIII: Dipeptidyl peptidase 3 (Drosophila melanogaster OX%3D7227)
ANN07583	1.39029	4.95371e-09	309.689	311.076	333.441	954.469	734.868	811.82	up	Similar to IDI1: Isopentenyl-diphosphate Delta-isomerase 1 (Bos taurus OX%3D9913)		ANN07591	1.49578	0.000348157	36.8779	63.4641	26.3008	113.162	134.179	110.821	up	Similar to ttc30a: Tetratricopeptide repeat protein 30A (Xenopus tropicalis OX%3D8364)
ANN07584	1.38741	1.78231e-05	163.045	181.289	263.974	678.611	406.636	501.514	up	Similar to zcchc4: rRNA N6-adenosine-methyltransferase ZCCHC4 (Xenopus laevis OX%3D8355)		ANN07592	1.46324	9.30938e-07	100.576	71.0798	62.8298	223.137	208.648	218.382	up	Protein of unknown function
ANN07586	1.20188	8.30581e-08	1211.74	1052.71	1168.59	2988.1	2300.95	2609.65	up	Similar to DppIII: Dipeptidyl peptidase 3 (Drosophila melanogaster OX%3D7227)		ANN07595	5.52369	5.60307e-46	11.1751	33.0013	4.38347	710.054	693.705	855.602	up	Similar to CG2145: Poly(U)-specific endoribonuclease homolog (Drosophila melanogaster OX%3D7227)
ANN07591	1.9983	8.32309e-08	34.7314	45.3223	44.7676	212.963	156.143	128.822	up	Similar to ttc30a: Tetratricopeptide repeat protein 30A (Xenopus tropicalis OX%3D8364)		ANN07605	1.35285	5.04303e-09	476.06	488.674	477.798	1534.86	903.024	1247.55	up	Similar to RTRAF: RNA transcription%2C translation and transport factor protein (Mus musculus OX%3D10090)
ANN07595	4.56426	2.58507e-07	7.7181	12.3606	60.2047	656.543	552.147	659.502	up	Similar to CG2145: Poly(U)-specific endoribonuclease homolog (Drosophila melanogaster OX%3D7227)		ANN07607	3.85673	2.66547e-08	0	7.61569	7.30579	62.1596	69.773	75.7819	up	Protein of unknown function
ANN07605	1.79638	4.58157e-12	328.019	417.172	480.094	1547.01	1161.44	1541	up	Similar to RTRAF: RNA transcription%2C translation and transport factor protein (Mus musculus OX%3D10090)		ANN07609	1.50259	4.78236e-06	120.691	111.697	198.717	313.189	550.133	353.649	up	Similar to akap-1: KH domain-containing protein akap-1 (Caenorhabditis elegans OX%3D6239)
ANN07607	2.58998	7.99739e-07	10.6124	13.3907	10.806	86.0678	50.4972	74.5384	up	Protein of unknown function		ANN07615	1.95455	1.13315e-17	156.452	167.545	203.101	808.872	610.514	619.293	up	Similar to POLA2: DNA polymerase alpha subunit B (Homo sapiens OX%3D9606)
ANN07609	1.59667	4.62831e-05	109.983	90.6447	67.9233	166.618	382.051	265.745	up	Similar to akap-1: KH domain-containing protein akap-1 (Caenorhabditis elegans OX%3D6239)		ANN07617	3.08462	6.85016e-50	182.154	151.045	141.732	1224.86	1253.23	1562.08	up	Protein of unknown function
ANN07615	1.61454	3.5303e-10	251.803	203.951	180.614	659.853	585.369	709.735	up	Similar to POLA2: DNA polymerase alpha subunit B (Homo sapiens OX%3D9606)		ANN07618	3.17171	2.42124e-27	50.288	52.0406	84.7471	423.164	617.223	632.33	up	Protein of unknown function
ANN07617	3.22255	6.34096e-33	69.4629	106.095	95.71	744.817	895.661	883.117	up	Protein of unknown function		ANN07621	4.50633	2.57475e-24	6.70507	7.61569	17.5339	181.697	240.851	280.311	up	Protein of unknown function
ANN07618	2.64267	6.05613e-09	36.661	56.6529	43.2239	120.274	360.125	371.071	up	Protein of unknown function		ANN07625	1.28278	0.0397679	20.1152	25.3856	21.9174	25.5014	81.8491	56.2253	up	Similar to Acadsb: Short/branched chain specific acyl-CoA dehydrogenase%2C mitochondrial (Rattus norvegicus OX%3D10116)
ANN07621	3.2557	4.17704e-13	15.4362	9.27048	15.4371	152.274	125.579	102.895	up	Protein of unknown function		ANN07637	1.59278	0.000900042	69.2857	35.5399	70.1355	79.6918	246.218	201.27	up	Similar to FAM120B: Constitutive coactivator of peroxisome proliferator-activated receptor gamma (Homo sapiens OX%3D9606)
ANN07625	2.28906	0.000867477	5.78857	10.3005	9.26226	57.3785	22.5909	43.7508	up	Similar to Acadsb: Short/branched chain specific acyl-CoA dehydrogenase%2C mitochondrial (Rattus norvegicus OX%3D10116)		ANN07641	1.02718	6.75717e-05	321.843	326.206	194.334	612.033	524.639	584.254	up	Similar to zgc:154061: Protein C15orf41 homolog (Danio rerio OX%3D7955)
ANN07626	1.32472	4.02114e-06	552.809	1049.62	821.254	2032.52	1887	2150.27	up	Similar to SRRD: SRR1-like protein (Homo sapiens OX%3D9606)		ANN07650	2.80111	0.000415665	5.58755	2.53856	5.84463	37.4552	24.8231	35.0389	up	Similar to spo: Cytochrome P450 307a1 (Drosophila melanogaster OX%3D7227)
ANN07636	1.17309	0.00432861	56.921	57.683	111.147	214.066	142.19	148.267	up	Similar to EEF2KMT: Protein-lysine N-methyltransferase EEF2KMT (Bos taurus OX%3D9913)		ANN07656	4.03088	2.19836e-10	6.70507	7.61569	0	79.6918	81.8491	82.3007	up	Similar to CFDP2: Craniofacial development protein 2 (Bos taurus OX%3D9913)
ANN07637	1.97161	5.48379e-08	45.3438	81.3742	47.855	259.307	181.391	247.921	up	Similar to FAM120B: Constitutive coactivator of peroxisome proliferator-activated receptor gamma (Homo sapiens OX%3D9606)		ANN07663	1.61129	0.0125027	31.2903	17.77	29.2231	119.538	24.8231	95.3385	up	Similar to DDB1: DNA damage-binding protein 1 (Gallus gallus OX%3D9031)
ANN07641	1.45447	8.1114e-10	268.204	235.882	280.955	747.024	649.155	753.486	up	Similar to zgc:154061: Protein C15orf41 homolog (Danio rerio OX%3D7955)		ANN07664	1.28123	1.249e-05	89.4009	97.7347	73.0579	243.857	182.483	207.789	up	Similar to ddb1: DNA damage-binding protein 1 (Xenopus laevis OX%3D8355)
ANN07650	2.10346	0.0100882	3.85905	6.18032	10.806	20.9652	18.6042	46.9916	up	Similar to spo: Cytochrome P450 307a1 (Drosophila melanogaster OX%3D7227)		ANN07670	1.65671	8.07578e-05	54.758	21.5778	64.2909	133.882	146.255	162.157	up	Similar to l(3)72Ab: Putative U5 small nuclear ribonucleoprotein 200 kDa helicase (Drosophila melanogaster OX%3D7227)
ANN07656	4.13466	6.73778e-06	3.85905	2.06011	0	57.3785	31.893	25.9264	up	Similar to CFDP2: Craniofacial development protein 2 (Bos taurus OX%3D9913)		ANN07685	1.1641	0.0121589	48.053	57.1177	40.9124	83.6764	167.724	75.7819	up	Similar to DDB1: DNA damage-binding protein 1 (Gallus gallus OX%3D9031)
ANN07663	1.78328	7.63755e-05	39.5552	18.541	37.049	90.4815	138.203	96.4137	up	Similar to DDB1: DNA damage-binding protein 1 (Gallus gallus OX%3D9031)		ANN07699	1.79694	8.19874e-07	73.7557	45.6942	55.524	271.749	193.888	144.23	up	Similar to Acadsb: Short/branched chain specific acyl-CoA dehydrogenase%2C mitochondrial (Mus musculus OX%3D10090)
ANN07664	1.39322	0.000323444	73.3219	76.224	66.3795	167.722	269.762	129.632	up	Similar to ddb1: DNA damage-binding protein 1 (Xenopus laevis OX%3D8355)		ANN07702	7.27228	4.20017e-20	2.23502	0	2.92231	265.374	262.991	255.866	up	Protein of unknown function
ANN07669	1.15704	2.62067e-07	474.663	493.396	483.181	1191.71	1079.71	965.758	up	Similar to DDX56: Probable ATP-dependent RNA helicase DDX56 (Homo sapiens OX%3D9606)		ANN07741	5.12844	0.000249657	0	2.53856	0	15.1415	52.3298	21.1863	up	Similar to pol: Pro-Pol polyprotein (Feline foamy virus OX%3D53182)
ANN07670	1.04396	0.00689888	63.6743	85.4944	54.0299	105.93	160.129	153.938	up	Similar to l(3)72Ab: Putative U5 small nuclear ribonucleoprotein 200 kDa helicase (Drosophila melanogaster OX%3D7227)		ANN07742	3.64165	1.36589e-60	164.274	123.12	105.203	1847.26	1636.31	1440.67	up	Similar to ncapg: Condensin complex subunit 3 (Xenopus laevis OX%3D8355)
ANN07675	1.37652	4.93218e-07	472.733	741.638	679.233	1875.84	1354.79	1684.4	up	Similar to MRPL17: 39S ribosomal protein L17%2C mitochondrial (Homo sapiens OX%3D9606)		ANN07743	1.01274	0.000253826	125.161	166.276	124.198	241.466	328.738	268.089	up	Similar to ADPRS: ADP-ribose glycohydrolase ARH3 (Gallus gallus OX%3D9031)
ANN07676	1.10271	0.0044223	72.3571	147.298	168.264	329.926	237.204	262.505	up	Similar to jockey\pol: RNA-directed DNA polymerase from mobile element jockey (Drosophila funebris OX%3D7221)		ANN07763	2.0607	1.02885e-12	70.4032	109.158	121.276	472.573	327.396	449.802	up	Similar to Pbdc1: Protein PBDC1 (Mus musculus OX%3D10090)
ANN07681	1.11301	0.0267579	29.9076	40.1721	18.5245	55.1716	73.7525	64.816	up	Similar to ddb1: DNA damage-binding protein 1 (Xenopus laevis OX%3D8355)		ANN07778	1.10794	6.10426e-08	282.73	328.744	251.319	636.738	592.4	632.33	up	Similar to Znfx1: NFX1-type zinc finger-containing protein 1 (Mus musculus OX%3D10090)
ANN07682	1.64798	0.00188324	44.379	24.7213	12.3497	90.4815	104.317	65.6262	up	Similar to ddb1: DNA damage-binding protein 1 (Xenopus laevis OX%3D8355)		ANN07779	1.31888	3.49514e-14	740.91	842.803	676.516	1768.36	2022.08	1849.73	up	Similar to ZNFX1: NFX1-type zinc finger-containing protein 1 (Homo sapiens OX%3D9606)
ANN07685	1.72413	8.55198e-05	54.0267	32.9617	33.9616	145.653	172.089	84.2608	up	Similar to DDB1: DNA damage-binding protein 1 (Gallus gallus OX%3D9031)		ANN07788	1.46838	3.89675e-05	84.9308	68.5412	51.1405	198.433	135.521	235.494	up	Similar to Exosc5: Exosome complex component RRP46 (Mus musculus OX%3D10090)
ANN07697	1.10518	0.000197398	156.291	107.126	128.128	303.444	258.466	281.949	up	Similar to PUS1: tRNA pseudouridine synthase A (Homo sapiens OX%3D9606)		ANN07798	1.07542	1.9367e-05	382.189	401.093	448.575	1138.8	659.489	796.932	up	Similar to HMGXB4: HMG domain-containing protein 4 (Homo sapiens OX%3D9606)
ANN07699	1.76292	1.34756e-09	86.8286	113.306	125.041	427.029	335.541	337.043	up	Similar to Acadsb: Short/branched chain specific acyl-CoA dehydrogenase%2C mitochondrial (Mus musculus OX%3D10090)		ANN07803	1.08055	0.0237236	23.4677	31.7321	35.0678	68.535	69.1021	52.151	up	Similar to Cgrrf1: Cell growth regulator with RING finger domain protein 1 (Rattus norvegicus OX%3D10116)
ANN07702	5.00074	4.10749e-21	1.92952	6.18032	9.26226	190.894	152.156	176.623	up	Protein of unknown function		ANN07806	1.28454	1.22307e-06	135.219	123.12	187.028	329.924	338.131	413.948	up	Similar to AQR: RNA helicase aquarius (Homo sapiens OX%3D9606)
ANN07732	2.46392	1.16039e-09	18.3305	19.571	30.8742	126.895	132.887	111.808	up	Similar to Pbdc1: Protein PBDC1 (Mus musculus OX%3D10090)		ANN07814	1.98845	1.31785e-12	102.811	159.93	83.286	426.351	507.196	441.653	up	Similar to spn-E: Probable ATP-dependent RNA helicase spindle-E (Culex quinquefasciatus OX%3D7176)
ANN07741	4.95544	0.0134456	0	0	0	6.6206	6.64437	6.4816	up	Similar to pol: Pro-Pol polyprotein (Feline foamy virus OX%3D53182)		ANN07817	2.6686	0.00430093	4.47004	1.26928	7.30579	14.3445	27.5067	39.9281	up	Protein of unknown function
ANN07742	3.48741	7.03686e-52	103.23	100.945	117.322	1181.78	1180.04	1230.69	up	Similar to ncapg: Condensin complex subunit 3 (Xenopus laevis OX%3D8355)		ANN07818	1.07534	2.32163e-09	1599.16	1240.09	1214.22	2971.71	2836.54	2737.93	up	Similar to eRF1: Eukaryotic peptide chain release factor subunit 1 (Drosophila melanogaster OX%3D7227)
ANN07763	1.438	1.9576e-05	138.926	86.5245	86.4478	290.203	227.902	331.372	up	Similar to Pbdc1: Protein PBDC1 (Mus musculus OX%3D10090)		ANN07819	1.40976	0.000457096	93.8709	60.9256	84.7471	274.937	114.052	248.532	up	Similar to DENR: Density-regulated protein homolog (Drosophila melanogaster OX%3D7227)
ANN07777	1.26933	4.77084e-06	366.61	512.967	517.143	1378.19	932.205	1054.88	up	Similar to ZNFX1: NFX1-type zinc finger-containing protein 1 (Homo sapiens OX%3D9606)		ANN07822	2.41114	2.80593e-17	61.4631	46.9634	75.9802	369.77	285.13	322.684	up	Protein of unknown function
ANN07778	1.10382	2.31192e-06	413.883	354.338	331.898	817.644	780.049	770.5	up	Similar to Znfx1: NFX1-type zinc finger-containing protein 1 (Mus musculus OX%3D10090)		ANN07831	1.31113	1.31648e-09	222.385	246.241	227.941	483.73	635.337	608.7	up	Similar to CG1234: Nucleolar complex protein 3 homolog (Drosophila melanogaster OX%3D7227)
ANN07779	1.44535	4.76402e-09	947.396	790.051	725.544	1818.46	2352.11	2539.98	up	Similar to ZNFX1: NFX1-type zinc finger-containing protein 1 (Homo sapiens OX%3D9606)		ANN07834	2.61005	1.24839e-13	31.2903	38.0785	21.9174	195.245	156.318	209.419	up	Protein of unknown function
ANN07788	1.46455	8.84154e-06	63.6743	111.246	83.3604	260.41	233.217	219.564	up	Similar to Exosc5: Exosome complex component RRP46 (Mus musculus OX%3D10090)		ANN07846	1.32855	0.00066528	130.749	151.045	111.048	215.965	537.386	233.05	up	Similar to ATG2B: Autophagy-related protein 2 homolog B (Homo sapiens OX%3D9606)
ANN07806	1.32946	1.09596e-05	109.983	143.177	97.2537	326.616	304.977	252.782	up	Similar to AQR: RNA helicase aquarius (Homo sapiens OX%3D9606)		ANN07849	1.84506	3.46834e-06	34.6428	25.3856	27.762	124.319	98.6215	93.7088	up	Protein of unknown function
ANN07813	1.02233	0.000773321	724.536	758.119	966.363	2156.11	1163.43	1653.62	up	Similar to Pcd: Pterin-4-alpha-carbinolamine dehydratase (Drosophila virilis OX%3D7244)		ANN07859	2.11722	8.20145e-08	22.3502	27.9242	48.2182	160.978	130.154	131.192	up	Similar to Nup50: Nuclear pore complex protein Nup50 (Drosophila melanogaster OX%3D7227)
ANN07814	1.18254	0.00072622	141.82	159.658	125.041	225.1	447.831	294.913	up	Similar to spn-E: Probable ATP-dependent RNA helicase spindle-E (Culex quinquefasciatus OX%3D7176)		ANN07862	1.71266	0.00306572	21.2327	35.5399	20.4562	117.944	35.5574	100.228	up	Similar to Slu7: Pre-mRNA-splicing factor Slu7 (Drosophila melanogaster OX%3D7227)
ANN07815	1.26832	0.0320534	23.1543	11.3306	23.1557	52.9648	51.8261	33.2182	up	Protein of unknown function		ANN07863	3.04603	0.00555173	1.11751	5.07713	1.46116	33.4706	13.4179	16.2972	up	Protein of unknown function
ANN07817	2.92272	1.58365e-06	7.7181	4.12021	15.4371	52.9648	89.0346	55.0936	up	Protein of unknown function		ANN07864	3.23615	7.18295e-14	25.7028	22.8471	35.0678	365.786	128.812	290.09	up	Similar to Claspin: Claspin (Drosophila melanogaster OX%3D7227)
ANN07818	1.54955	1.32044e-09	1511.78	1026.96	1117.65	2970.44	3798.59	3936.76	up	Similar to eRF1: Eukaryotic peptide chain release factor subunit 1 (Drosophila melanogaster OX%3D7227)		ANN07865	1.20763	0.0443244	17.8802	20.3085	42.3736	87.661	38.241	58.6698	up	Similar to PRKD3: Serine/threonine-protein kinase D3 (Homo sapiens OX%3D9606)
ANN07822	2.60437	3.45112e-16	36.661	56.6529	43.2239	302.341	249.164	280.329	up	Protein of unknown function		ANN07872	1.52602	0.0479964	7.82258	13.9621	5.84463	31.0798	22.8104	26.0755	up	Similar to Nup50: Nuclear pore complex protein Nup50 (Drosophila melanogaster OX%3D7227)
ANN07823	1.35119	2.57155e-05	109.983	87.5545	66.3795	242.755	224.58	211.462	up	Similar to EID3: EP300-interacting inhibitor of differentiation 3 (Bos taurus OX%3D9913)		ANN07878	2.37211	8.01338e-07	20.1152	45.6942	24.8397	124.319	243.535	100.228	up	Similar to Claspin: Claspin (Drosophila melanogaster OX%3D7227)
ANN07830	2.05406	0.000217822	13.5067	13.3907	12.3497	36.4133	67.1082	59.1446	up	Similar to Meioc: Meiosis-specific coiled-coil domain-containing protein MEIOC (Mus musculus OX%3D10090)		ANN07898	3.40659	1.23644e-18	13.4101	17.77	39.4512	249.435	262.32	220.827	up	Protein of unknown function
ANN07831	1.34422	3.95959e-07	214.177	178.199	226.925	599.164	523.577	448.04	up	Similar to CG1234: Nucleolar complex protein 3 homolog (Drosophila melanogaster OX%3D7227)		ANN07899	1.16829	0.000181052	84.9308	123.12	84.7471	235.888	175.103	247.717	up	Similar to Sstr4: Somatostatin receptor type 4 (Mus musculus OX%3D10090)
ANN07833	1.52027	0.00022211	110.948	53.5628	74.0981	144.55	251.822	288.431	up	Similar to eRF1: Eukaryotic peptide chain release factor subunit 1 (Drosophila melanogaster OX%3D7227)		ANN07906	2.80227	0.0118192	0	1.26928	17.5339	63.7535	13.4179	49.7064	up	Protein of unknown function
ANN07834	2.69278	1.33723e-08	18.3305	44.2923	12.3497	154.481	134.881	204.17	up	Protein of unknown function		ANN07910	4.63166	0.0368977	0	0	0	6.37535	5.36716	5.70401	up	Similar to pol: Retrovirus-related Pol polyprotein from transposon 297 (Drosophila melanogaster OX%3D7227)
ANN07843	1.61707	0.00535274	26.0486	17.5109	15.4371	34.2064	57.1416	90.7423	up	Protein of unknown function		ANN07916	6.91797	2.72288e-54	2.23502	2.53856	16.0727	724.399	763.478	846.638	up	Protein of unknown function
ANN07845	1.32534	0.0270508	11.5771	26.7814	15.4371	35.3099	52.4905	46.9916	up	Similar to LINE-1 retrotransposable element ORF2 protein (Homo sapiens OX%3D9606)		ANN07923	1.23058	0.0416603	23.4677	16.5007	30.6843	82.8795	32.8738	49.7064	up	Protein of unknown function
ANN07849	1.31361	0.0199022	13.5067	37.0819	18.5245	51.8613	55.8127	64.816	up	Protein of unknown function		ANN07932	8.96474	1.16329e-16	0	2.53856	0	394.475	426.689	445.728	up	Protein of unknown function
ANN07859	1.45241	0.000126745	35.6962	55.6229	58.661	131.309	118.27	157.989	up	Similar to Nup50: Nuclear pore complex protein Nup50 (Drosophila melanogaster OX%3D7227)		ANN07939	1.06242	0.0152543	109.516	93.9269	92.0529	315.58	202.61	99.4128	up	Similar to Rad51d: DNA repair protein RAD51 homolog 4 (Mus musculus OX%3D10090)
ANN07864	1.59278	3.86044e-05	32.8019	65.9234	60.2047	134.619	172.754	168.522	up	Similar to Claspin: Claspin (Drosophila melanogaster OX%3D7227)		ANN07944	1.68104	1.19759e-17	227.972	237.356	223.557	761.854	794.339	652.702	up	Similar to Rtkn2: Rhotekin-2 (Mus musculus OX%3D10090)
ANN07872	1.91907	0.0015182	16.401	8.24043	10.806	46.3442	33.8863	55.0936	up	Similar to Nup50: Nuclear pore complex protein Nup50 (Drosophila melanogaster OX%3D7227)		ANN07954	1.18071	1.31451e-07	241.382	284.319	197.256	543.498	582.336	514.991	up	Similar to HAT1: Histone acetyltransferase type B catalytic subunit (Homo sapiens OX%3D9606)
ANN07875	1.2214	1.05874e-07	686.91	625.242	572.716	1478.6	1290.34	1630.12	up	Similar to ZMPSTE24: CAAX prenyl protease 1 homolog (Homo sapiens OX%3D9606)		ANN07990	5.48325	3.37624e-58	13.4101	8.88498	20.4562	707.664	593.071	580.994	up	Similar to Oat: Ornithine aminotransferase%2C mitochondrial (Drosophila melanogaster OX%3D7227)
ANN07878	2.16029	3.297e-11	50.1676	41.2021	40.1365	212.963	177.405	200.929	up	Similar to Claspin: Claspin (Drosophila melanogaster OX%3D7227)		ANN07991	6.88385	3.28536e-28	2.23502	2.53856	4.38347	428.742	341.485	281.126	up	Similar to Oat: Ornithine aminotransferase%2C mitochondrial (Drosophila melanogaster OX%3D7227)
ANN07898	3.67531	0.0178747	34.7314	0	12.3497	241.652	190.693	170.952	up	Protein of unknown function		ANN07999	1.15737	0.00103437	188.859	187.854	217.712	624.784	237.497	463.655	up	Protein of unknown function
ANN07902	1.12893	0.00584955	99.3705	139.057	155.915	433.649	181.391	247.111	up	Similar to Astakine (Penaeus monodon OX%3D6687)		ANN08000	2.74471	1.10299e-07	13.4101	17.77	21.9174	141.851	57.026	154.823	up	Similar to Slbp: Histone RNA hairpin-binding protein (Drosophila melanogaster OX%3D7227)
ANN07916	5.64635	7.2517e-48	9.64762	8.24043	21.6119	719.438	528.892	621.423	up	Protein of unknown function		ANN08009	7.2112	2.48379e-53	4.47004	1.26928	11.6893	683.756	925.163	850.713	up	Similar to OV16: OV-16 antigen (Onchocerca volvulus OX%3D6282)
ANN07923	1.29987	0.00888602	44.379	17.5109	41.6802	94.8952	91.6923	67.2466	up	Protein of unknown function		ANN08010	6.84019	1.03578e-31	4.47004	2.53856	2.92231	337.097	455.537	365.872	up	Similar to OV16: OV-16 antigen (Onchocerca volvulus OX%3D6282)
ANN07926	3.57641	0.0158897	2.89429	0	0	9.9309	19.2687	8.91219	up	Protein of unknown function		ANN08012	6.88982	5.06851e-33	5.58755	0	5.84463	318.767	556.172	476.692	up	Similar to OV16: OV-16 antigen (Onchocerca volvulus OX%3D6282)
ANN07927	1.36034	0.000530801	44.379	54.5928	38.5928	133.515	90.3635	132.063	up	Protein of unknown function		ANN08013	7.58518	1.11564e-11	0	1.26928	1.46116	166.556	134.179	188.232	up	Protein of unknown function
ANN07932	5.73486	2.13826e-07	2.89429	0	12.3497	241.652	267.768	256.833	up	Protein of unknown function		ANN08026	4.09726	1.40891e-13	13.4101	3.80785	2.92231	117.944	103.989	137.711	up	Protein of unknown function
ANN07939	1.56059	1.43447e-05	77.181	118.456	180.614	431.442	352.816	317.598	up	Similar to Rad51d: DNA repair protein RAD51 homolog 4 (Mus musculus OX%3D10090)		ANN08028	1.80776	8.10357e-09	67.0507	73.6184	67.2132	313.986	228.104	185.788	up	Similar to rasp: Protein-cysteine N-palmitoyltransferase Rasp (Drosophila melanogaster OX%3D7227)
ANN07944	1.58428	4.37336e-12	249.873	259.573	256.256	820.954	779.385	695.961	up	Similar to Rtkn2: Rhotekin-2 (Mus musculus OX%3D10090)		ANN08043	2.35032	1.45134e-14	90.5184	97.7347	121.276	700.491	343.498	531.288	up	Similar to acsf2: Medium-chain acyl-CoA ligase ACSF2%2C mitochondrial (Danio rerio OX%3D7955)
ANN07946	1.12417	5.82918e-07	386.87	444.983	376.665	880.539	875.064	880.687	up	Similar to atl: Atlastin (Drosophila melanogaster OX%3D7227)		ANN08044	3.41663	5.85629e-08	3.35253	3.80785	20.4562	121.132	76.482	86.375	up	Similar to ACSF2: Medium-chain acyl-CoA ligase ACSF2%2C mitochondrial (Bos taurus OX%3D9913)
ANN07954	1.21571	1.45827e-06	235.402	192.62	237.731	516.407	555.469	472.346	up	Similar to HAT1: Histone acetyltransferase type B catalytic subunit (Homo sapiens OX%3D9606)		ANN08045	3.31296	1.46355e-14	22.3502	7.61569	29.2231	224.731	150.951	208.604	up	Similar to Acsf2: Medium-chain acyl-CoA ligase ACSF2%2C mitochondrial (Mus musculus OX%3D10090)
ANN07990	6.18777	9.05922e-57	15.4362	8.24043	6.17484	763.576	657.128	848.279	up	Similar to Oat: Ornithine aminotransferase%2C mitochondrial (Drosophila melanogaster OX%3D7227)		ANN08051	2.20624	3.0839e-06	14.5276	21.5778	18.995	109.178	72.4566	71.7076	up	Similar to CG13690: Ribonuclease H2 subunit A (Drosophila melanogaster OX%3D7227)
ANN07991	6.52945	1.67887e-38	7.7181	4.12021	3.08742	615.716	386.038	443.989	up	Similar to Oat: Ornithine aminotransferase%2C mitochondrial (Drosophila melanogaster OX%3D7227)		ANN08052	1.86021	2.68506e-16	198.917	214.509	157.805	808.075	605.147	664.925	up	Similar to CG13690: Ribonuclease H2 subunit A (Drosophila melanogaster OX%3D7227)
ANN08009	3.92337	5.9411e-17	13.5067	17.5109	64.8358	449.097	437.2	516.097	up	Similar to OV16: OV-16 antigen (Onchocerca volvulus OX%3D6282)		ANN08053	1.18331	0.00208414	898.479	1019.23	926.374	3284.9	858.074	2316.64	up	Similar to Cyp6a14: Probable cytochrome P450 6a14 (Drosophila melanogaster OX%3D7227)
ANN08010	3.50135	2.21105e-18	22.1895	15.4508	15.4371	178.756	170.096	258.454	up	Similar to OV16: OV-16 antigen (Onchocerca volvulus OX%3D6282)		ANN08056	1.87074	3.41815e-20	201.152	162.468	207.484	663.036	705.11	719.52	up	Similar to SMYD5: SET and MYND domain-containing protein 5 (Gallus gallus OX%3D9031)
ANN08012	4.73284	1.53304e-25	2.89429	16.4809	15.4371	278.065	273.748	343.525	up	Similar to OV16: OV-16 antigen (Onchocerca volvulus OX%3D6282)		ANN08058	3.72949	2.19433e-45	42.4654	40.617	29.2231	491.699	509.209	501.138	up	Similar to ARHGAP19: Rho GTPase-activating protein 19 (Gallus gallus OX%3D9031)
ANN08013	5.16375	8.47819e-16	4.82381	0	6.17484	112.55	114.283	143.405	up	Protein of unknown function		ANN08060	1.99456	1.62375e-19	109.516	139.621	130.043	496.48	530.678	480.767	up	Similar to POLE2: DNA polymerase epsilon subunit 2 (Gallus gallus OX%3D9031)
ANN08026	2.86113	4.64307e-06	13.5067	12.3606	3.08742	38.6202	99.6656	79.3996	up	Protein of unknown function		ANN08070	1.05328	4.86217e-05	249.205	187.854	150.499	435.117	401.195	387.058	up	Similar to exosc9: Exosome complex component RRP45 (Danio rerio OX%3D7955)
ANN08028	2.05553	1.91238e-12	78.1457	79.3141	87.9915	382.891	273.084	362.969	up	Similar to rasp: Protein-cysteine N-palmitoyltransferase Rasp (Drosophila melanogaster OX%3D7227)		ANN08078	3.21999	0.0293754	1.11751	0	2.92231	17.5322	11.4052	7.33373	up	Similar to pol: RNA-directed DNA polymerase from mobile element jockey (Drosophila melanogaster OX%3D7227)
ANN08036	1.14401	0.000102466	276.887	261.634	387.471	838.609	564.772	639.247	up	Similar to snr-7: Probable small nuclear ribonucleoprotein G (Caenorhabditis elegans OX%3D6239)		ANN08081	1.72246	2.53082e-10	89.4009	68.5412	97.8975	258.202	269.7	315.35	up	Similar to mtTFB2: Dimethyladenosine transferase 2%2C mitochondrial (Drosophila melanogaster OX%3D7227)
ANN08043	1.96766	6.37351e-16	136.031	170.989	163.633	624.543	594.007	619.803	up	Similar to acsf2: Medium-chain acyl-CoA ligase ACSF2%2C mitochondrial (Danio rerio OX%3D7955)		ANN08082	1.67045	4.89974e-21	498.41	541.984	619.531	1916.59	1632.29	1729.95	up	Similar to Echs1: Enoyl-CoA hydratase%2C mitochondrial (Mus musculus OX%3D10090)
ANN08044	3.21873	3.5956e-09	12.5419	12.3606	3.08742	118.067	70.4303	85.071	up	Similar to ACSF2: Medium-chain acyl-CoA ligase ACSF2%2C mitochondrial (Bos taurus OX%3D9913)		ANN08087	1.29415	1.75032e-09	182.154	199.277	179.722	429.539	439.436	507.657	up	Similar to GK22419: Methylthioribose-1-phosphate isomerase (Drosophila willistoni OX%3D7260)
ANN08045	1.84141	8.97629e-08	58.8505	41.2021	43.2239	176.549	188.7	150.697	up	Similar to Acsf2: Medium-chain acyl-CoA ligase ACSF2%2C mitochondrial (Mus musculus OX%3D10090)		ANN08097	1.53069	1.03296e-11	136.336	168.815	165.111	485.323	408.575	462.84	up	Protein of unknown function
ANN08051	2.34975	1.41845e-05	14.4714	17.5109	6.17484	79.4472	68.437	52.663	up	Similar to CG13690: Ribonuclease H2 subunit A (Drosophila melanogaster OX%3D7227)		ANN08099	1.28828	0.0482572	17.8802	12.6928	13.1504	38.2521	43.6081	25.2606	up	Similar to H: Protein hairless (Drosophila melanogaster OX%3D7227)
ANN08052	1.93859	4.1295e-13	166.904	230.732	211.488	814.333	635.866	883.117	up	Similar to CG13690: Ribonuclease H2 subunit A (Drosophila melanogaster OX%3D7227)		ANN08102	1.4578	4.99373e-25	6489.39	6305.79	6027.27	17677.2	16170.6	17858.4	up	Similar to fau: 40S ribosomal protein S30 (Oryzias latipes OX%3D8090)
ANN08056	2.90976	9.97619e-24	246.979	201.89	358.141	2493.76	1716.91	1833.48	up	Similar to SMYD5: SET and MYND domain-containing protein 5 (Gallus gallus OX%3D9031)		ANN08103	1.13496	6.24184e-06	197.799	149.775	194.334	458.228	334.776	397.651	up	Similar to PWWP2B: PWWP domain-containing protein 2B (Homo sapiens OX%3D9606)
ANN08058	3.3726	2.72681e-26	57.8857	49.4426	27.7868	441.373	525.57	457.763	up	Similar to ARHGAP19: Rho GTPase-activating protein 19 (Gallus gallus OX%3D9031)		ANN08104	1.69181	2.71999e-14	151.981	171.353	189.95	625.581	538.728	490.545	up	Protein of unknown function
ANN08060	2.69438	2.0705e-11	76.2162	109.186	27.7868	487.717	435.871	473.967	up	Similar to POLE2: DNA polymerase epsilon subunit 2 (Gallus gallus OX%3D9031)		ANN08107	1.6362	4.40156e-29	3660.97	3557.8	3712.8	11830.3	10306.3	11844	up	Similar to RPL29: 60S ribosomal protein L29 (Macaca fascicularis OX%3D9541)
ANN08081	1.81458	2.45005e-10	70.4276	85.4944	69.467	267.031	268.433	259.264	up	Similar to mtTFB2: Dimethyladenosine transferase 2%2C mitochondrial (Drosophila melanogaster OX%3D7227)		ANN08108	3.45353	3.41336e-28	35.7603	64.7334	52.6017	721.211	410.587	538.622	up	Protein of unknown function
ANN08082	1.66372	5.2976e-08	560.527	1007.39	1060.53	3266.16	2254.44	2801.67	up	Similar to Echs1: Enoyl-CoA hydratase%2C mitochondrial (Mus musculus OX%3D10090)		ANN08130	6.76741	4.61702e-09	0	2.53856	0	94.0364	79.8364	102.672	up	Protein of unknown function
ANN08086	1.80064	0.000530946	77.181	100.945	95.71	623.44	178.069	153.938	up	Similar to Gld: Glucose dehydrogenase [FAD%2C quinone] (Drosophila melanogaster OX%3D7227)		ANN08131	5.68913	5.75933e-07	0	7.61569	17.5339	401.647	406.562	468.544	up	Protein of unknown function
ANN08087	1.40331	2.76089e-08	171.728	165.839	142.021	431.442	405.971	435.077	up	Similar to GK22419: Methylthioribose-1-phosphate isomerase (Drosophila willistoni OX%3D7260)		ANN08159	1.87707	3.2326e-14	160.922	158.66	176.8	727.587	455.537	639.664	up	Similar to RPIA: Ribose-5-phosphate isomerase (Sus scrofa OX%3D9823)
ANN08097	1.475	3.06822e-06	109.018	186.44	160.546	499.855	344.178	422.924	up	Protein of unknown function		ANN08171	1.78117	5.86024e-31	8618.24	7789.59	7484.05	28857.2	24559.4	28706.7	up	Similar to RpS23: 40S ribosomal protein S23 (Spodoptera frugiperda OX%3D7108)
ANN08102	2.03768	3.30878e-12	4055.86	5381	5986.51	28363.7	15139.2	19818.3	up	Similar to fau: 40S ribosomal protein S30 (Oryzias latipes OX%3D8090)		ANN08173	1.51341	2.80716e-10	151.981	110.428	128.582	356.223	395.828	365.872	up	Similar to Nup43: Nucleoporin Nup43 (Mus musculus OX%3D10090)
ANN08104	1.51678	2.31661e-09	222.86	217.341	203.77	505.372	676.397	661.123	up	Protein of unknown function		ANN08178	2.85551	3.16363e-30	69.2857	63.4641	55.524	483.73	483.715	400.096	up	Similar to LSM1: U6 snRNA-associated Sm-like protein LSm1 (Bos taurus OX%3D9913)
ANN08107	2.46385	2.27383e-18	2043.37	2526.72	2838.88	18311.5	10025	12531.4	up	Similar to RPL29: 60S ribosomal protein L29 (Macaca fascicularis OX%3D9541)		ANN08191	1.00423	0.00302993	94.9884	60.9256	99.3587	143.445	171.078	197.196	up	Similar to POLR3A: DNA-directed RNA polymerase III subunit RPC1 (Gallus gallus OX%3D9031)
ANN08108	4.32357	1.62076e-44	50.1676	31.9317	26.2431	654.336	770.747	781.843	up	Protein of unknown function		ANN08204	5.16569	0.00810604	0	0	0	7.96918	10.7343	6.51887	up	Similar to nas-14: Zinc metalloproteinase nas-14 (Caenorhabditis elegans OX%3D6239)
ANN08130	3.13893	9.29296e-07	5.78857	2.06011	15.4371	62.8957	63.786	64.816	up	Protein of unknown function		ANN08219	1.02195	0.000573987	113.986	81.2341	134.426	225.528	207.306	235.494	up	Similar to DCAF5: DDB1- and CUL4-associated factor 5 (Homo sapiens OX%3D9606)
ANN08131	4.8192	5.56978e-33	7.7181	12.3606	16.9808	336.547	280.392	392.947	up	Protein of unknown function		ANN08223	1.20021	0.0093548	43.5829	93.9269	30.6843	126.71	145.584	114.895	up	Similar to PPP2R3C: Serine/threonine-protein phosphatase 2A regulatory subunit B'' subunit gamma (Bos taurus OX%3D9913)
ANN08159	2.10946	9.10189e-15	110.948	138.027	92.6226	518.613	450.488	512.856	up	Similar to RPIA: Ribose-5-phosphate isomerase (Sus scrofa OX%3D9823)		ANN08234	3.36914	2.07631e-29	29.0553	40.617	51.1405	482.136	348.865	404.985	up	Similar to ARHGAP11B: Rho GTPase-activating protein 11B (Homo sapiens OX%3D9606)
ANN08171	2.3276	3.28188e-15	5931.36	7708.92	9189.71	51851.4	27803.4	34936.6	up	Similar to RpS23: 40S ribosomal protein S23 (Spodoptera frugiperda OX%3D7108)		ANN08235	3.20686	9.91327e-35	312.903	364.284	194.334	3380.53	2120.03	2561.1	up	Similar to Dhrs11: Dehydrogenase/reductase SDR family member 11 (Mus musculus OX%3D10090)
ANN08173	1.22229	2.23309e-05	108.053	93.7349	112.691	262.617	223.251	247.111	up	Similar to Nup43: Nucleoporin Nup43 (Mus musculus OX%3D10090)		ANN08247	1.55214	6.50135e-06	127.396	120.582	204.562	586.532	271.712	466.099	up	Similar to SEC13: Protein SEC13 homolog (Bos taurus OX%3D9913)
ANN08174	1.04733	0.000246506	401.341	622.152	666.883	1316.4	1031.21	1142.38	up	Similar to mRpL11: 39S ribosomal protein L11%2C mitochondrial (Drosophila melanogaster OX%3D7227)		ANN08255	1.54517	2.46433e-13	321.843	238.625	245.474	783.371	721.882	851.527	up	Similar to SEC13: Protein SEC13 homolog (Bos taurus OX%3D9913)
ANN08175	1.00126	0.00554351	136.031	143.177	77.1855	191.997	253.815	271.417	up	Similar to MIMI_L138: Uncharacterized protein L138 (Acanthamoeba polyphaga mimivirus OX%3D212035)		ANN08265	1.25391	3.73701e-06	166.509	110.428	192.873	396.068	376.372	346.315	up	Similar to EXOSC4: Exosome complex component RRP41 (Homo sapiens OX%3D9606)
ANN08178	2.96709	7.60229e-24	46.3086	67.9835	50.9424	481.097	427.233	387.275	up	Similar to LSM1: U6 snRNA-associated Sm-like protein LSm1 (Bos taurus OX%3D9913)		ANN08273	4.90123	0.000457604	2.23502	0	0	17.5322	22.1395	34.2241	up	Similar to ZFP69: Zinc finger protein 69 homolog (Homo sapiens OX%3D9606)
ANN08192	1.4232	0.00287951	30.8724	28.8415	18.5245	77.2403	81.0613	54.2834	up	Similar to POLR3A: DNA-directed RNA polymerase III subunit RPC1 (Gallus gallus OX%3D9031)		ANN08274	2.21105	1.58025e-05	14.5276	25.3856	8.76694	74.1134	81.8491	70.8927	up	Similar to ZNF569: Zinc finger protein 569 (Homo sapiens OX%3D9606)
ANN08234	4.33733	1.29258e-33	17.3657	24.7213	10.806	391.719	374.078	332.992	up	Similar to ARHGAP11B: Rho GTPase-activating protein 11B (Homo sapiens OX%3D9606)		ANN08275	5.55246	6.39052e-08	2.23502	0	1.46116	47.8151	55.6842	74.1522	up	Similar to REST: RE1-silencing transcription factor (Homo sapiens OX%3D9606)
ANN08235	2.24435	1.06392e-17	469.839	356.398	495.531	2470.59	1637.17	2151.08	up	Similar to Dhrs11: Dehydrogenase/reductase SDR family member 11 (Mus musculus OX%3D10090)		ANN08286	1.34605	1.71605e-08	117.339	119.313	124.198	288.484	332.093	295.794	up	Similar to Prpf4: U4/U6 small nuclear ribonucleoprotein Prp4 (Mus musculus OX%3D10090)
ANN08247	1.77303	1.4192e-06	120.595	94.7649	154.371	556.13	253.151	451.281	up	Similar to SEC13: Protein SEC13 homolog (Bos taurus OX%3D9913)		ANN08288	1.51494	2.59368e-13	278.26	305.897	328.76	1000.13	736.642	870.269	up	Similar to Cog7: Conserved oligomeric Golgi complex subunit 7 (Mus musculus OX%3D10090)
ANN08255	1.24229	8.29119e-06	256.627	359.489	405.996	933.504	734.203	746.194	up	Similar to SEC13: Protein SEC13 homolog (Bos taurus OX%3D9913)		ANN08291	1.6476	2.04409e-32	9229.52	8702.2	8730.41	29073.2	26242.7	28222.6	up	Similar to RpL17: 60S ribosomal protein L17 (Diaphorina citri OX%3D121845)
ANN08257	2.60571	0.00455968	3.85905	3.09016	3.08742	14.3446	22.5909	24.306	up	Similar to Psmd9: 26S proteasome non-ATPase regulatory subunit 9 (Rattus norvegicus OX%3D10116)		ANN08297	1.31705	0.00162616	32.4078	29.1935	32.1455	71.7227	77.1529	84.7453	up	Similar to kdm3a-a: Lysine-specific demethylase 3A-A (Xenopus laevis OX%3D8355)
ANN08265	1.40857	1.77259e-06	160.15	156.568	109.603	447.994	345.507	345.145	up	Similar to EXOSC4: Exosome complex component RRP41 (Homo sapiens OX%3D9606)		ANN08299	1.37419	9.01973e-14	423.537	390.939	388.668	1161.11	945.29	1014.5	up	Similar to SRP72: Signal recognition particle subunit SRP72 (Canis lupus familiaris OX%3D9615)
ANN08273	6.59872	1.31813e-05	0	0	0	19.8618	15.9465	25.9264	up	Similar to ZFP69: Zinc finger protein 69 homolog (Homo sapiens OX%3D9606)		ANN08308	1.77228	0.000859977	30.1728	17.77	26.3008	63.7535	133.508	56.2253	up	Protein of unknown function
ANN08274	4.09609	1.43463e-07	3.85905	0	6.17484	50.7579	42.524	66.4364	up	Similar to ZNF569: Zinc finger protein 569 (Homo sapiens OX%3D9606)		ANN08309	1.97749	2.43123e-18	214.562	276.704	235.246	1046.35	746.035	1068.28	up	Similar to NOP16: Nucleolar protein 16 (Homo sapiens OX%3D9606)
ANN08275	4.61353	5.29451e-08	1.92952	3.09016	1.54371	82.7575	31.893	51.0426	up	Similar to REST: RE1-silencing transcription factor (Homo sapiens OX%3D9606)		ANN08321	3.56943	2.43472e-06	2.23502	5.07713	5.84463	73.3165	30.8611	48.8915	up	Similar to Znf287: Zinc finger protein 287 (Mus musculus OX%3D10090)
ANN08286	1.34698	6.82406e-07	135.067	146.268	159.002	421.511	321.588	375.933	up	Similar to Prpf4: U4/U6 small nuclear ribonucleoprotein Prp4 (Mus musculus OX%3D10090)		ANN08322	1.15366	0.00587928	53.6405	31.7321	56.9851	133.085	90.5708	92.8939	up	Similar to ZNF595: Zinc finger protein 595 (Homo sapiens OX%3D9606)
ANN08288	1.61904	3.77435e-14	362.75	334.767	356.597	1106.74	1081.7	1049.21	up	Similar to Cog7: Conserved oligomeric Golgi complex subunit 7 (Mus musculus OX%3D10090)		ANN08323	1.11104	0.0237336	43.5829	25.3856	33.6066	70.1288	97.9506	53.7807	up	Similar to Znf879: Zinc finger protein 879 (Mus musculus OX%3D10090)
ANN08291	2.4168	1.59516e-17	5296.54	7820.17	7857.49	48789.4	28098.4	35105.9	up	Similar to RpL17: 60S ribosomal protein L17 (Diaphorina citri OX%3D121845)		ANN08324	2.26566	2.24607e-14	69.2857	90.119	67.2132	475.76	313.308	301.498	up	Similar to ZNF235: Zinc finger protein 235 (Homo sapiens OX%3D9606)
ANN08292	1.07357	4.757e-05	168.833	177.169	157.458	339.857	328.232	392.947	up	Similar to DTWD2: tRNA-uridine aminocarboxypropyltransferase 2 (Homo sapiens OX%3D9606)		ANN08325	1.46381	2.95924e-11	166.509	192.931	182.645	564.218	485.057	444.913	up	Similar to Zinc finger protein Xfin (Xenopus laevis OX%3D8355)
ANN08299	1.52375	1.80267e-10	356.962	387.3	341.16	1225.91	957.454	941.452	up	Similar to SRP72: Signal recognition particle subunit SRP72 (Canis lupus familiaris OX%3D9615)		ANN08333	1.37831	1.01337e-10	166.509	171.353	157.805	454.244	405.891	429.431	up	Protein of unknown function
ANN08308	1.95245	1.85188e-06	47.2733	25.7513	27.7868	152.274	134.216	107.757	up	Protein of unknown function		ANN08335	1.60141	3.0248e-27	1067.22	1067.47	1025.73	3037.06	3295.43	3258.62	up	Similar to CG1785: Ribosome biogenesis protein NOP53 (Drosophila melanogaster OX%3D7227)
ANN08309	2.70736	9.91404e-16	92.6171	184.38	154.371	1244.67	700.981	868.534	up	Similar to NOP16: Nucleolar protein 16 (Homo sapiens OX%3D9606)		ANN08356	1.59537	2.39564e-24	7096.19	6149.67	6097.41	20537.4	17566.7	20351.1	up	Similar to RpL18A: 60S ribosomal protein L18a (Spodoptera frugiperda OX%3D7108)
ANN08320	1.39439	0.000677107	45.3438	31.9317	38.5928	124.688	82.3902	98.8443	up	Similar to ZFP62: Zinc finger protein 62 homolog (Homo sapiens OX%3D9606)		ANN08357	1.9603	2.86805e-43	6164.19	5440.14	5571.39	22779.9	21366	22697.1	up	Similar to RpL10A: 60S ribosomal protein L10a (Spodoptera frugiperda OX%3D7108)
ANN08321	6.81024	7.76811e-07	0	1.03005	0	35.3099	53.155	50.2324	up	Similar to Znf287: Zinc finger protein 287 (Mus musculus OX%3D10090)		ANN08358	2.34875	1.28151e-10	58.1106	50.7713	111.048	247.045	390.461	475.878	up	Similar to DNApol-epsilon255: DNA polymerase epsilon catalytic subunit 1 (Drosophila melanogaster OX%3D7227)
ANN08322	1.74238	5.70747e-05	59.8152	36.0519	27.7868	180.963	103.652	135.303	up	Similar to ZNF595: Zinc finger protein 595 (Homo sapiens OX%3D9606)		ANN08362	1.98112	3.79168e-32	9934.67	7600.46	7954.54	32044.1	32435.7	36161	up	Similar to RpL4: 60S ribosomal protein L4 (Drosophila melanogaster OX%3D7227)
ANN08323	1.75268	0.00215958	45.3438	21.6311	9.26226	63.9991	93.6856	104.516	up	Similar to Znf879: Zinc finger protein 879 (Mus musculus OX%3D10090)		ANN08370	1.03736	1.19326e-05	229.09	219.586	191.412	521.185	390.461	404.17	up	Protein of unknown function
ANN08324	2.5666	4.72765e-19	94.5467	65.9234	81.8166	528.544	397.998	510.426	up	Similar to ZNF235: Zinc finger protein 235 (Homo sapiens OX%3D9606)		ANN08373	1.55121	0.000143012	33.5253	27.9242	27.762	78.8949	87.2163	96.1533	up	Similar to CFDP2: Craniofacial development protein 2 (Bos taurus OX%3D9913)
ANN08325	1.86598	1.64865e-16	246.979	254.423	290.218	1009.64	891.675	979.531	up	Similar to Zinc finger protein Xfin (Xenopus laevis OX%3D8355)		ANN08378	1.28876	0.000315962	49.1705	59.6563	46.757	154.602	112.71	113.265	up	Similar to pol: RNA-directed DNA polymerase from mobile element jockey (Drosophila melanogaster OX%3D7227)
ANN08327	1.79556	0.00100923	15.4362	13.3907	13.8934	59.5854	50.4972	38.8896	up	Similar to ZNF585A: Zinc finger protein 585A (Homo sapiens OX%3D9606)		ANN08379	2.10616	1.51885e-11	65.9331	45.6942	64.2909	312.392	209.99	235.494	up	Similar to DPH5: Diphthine methyl ester synthase (Homo sapiens OX%3D9606)
ANN08331	1.00298	0.00150577	97.441	98.8851	75.6418	195.308	178.734	174.193	up	Similar to ZNF91: Zinc finger protein 91 (Homo sapiens OX%3D9606)		ANN08386	1.45049	4.58585e-05	56.9931	57.1177	39.4512	162.571	145.584	113.265	up	Similar to DPH5: Diphthine methyl ester synthase (Homo sapiens OX%3D9606)
ANN08332	1.08727	9.63724e-06	954.15	796.231	815.079	2105.35	1489	1860.22	up	Similar to ZNF208: Zinc finger protein 208 (Homo sapiens OX%3D9606)		ANN08391	2.44553	0.00248053	11.1751	2.53856	5.84463	55.7843	25.494	26.8903	up	Similar to Amt: Aminomethyltransferase%2C mitochondrial (Mus musculus OX%3D10090)
ANN08333	1.73437	5.28512e-10	190.058	170.989	222.294	511.993	629.222	793.996	up	Protein of unknown function		ANN08397	1.06085	4.22158e-08	329.666	327.475	344.833	671.802	643.388	774.931	up	Similar to EEF1E1: Eukaryotic translation elongation factor 1 epsilon-1 (Cricetulus griseus OX%3D10029)
ANN08335	2.37741	4.1458e-25	953.185	725.158	847.497	5044.9	3876.99	4204.94	up	Similar to CG1785: Ribosome biogenesis protein NOP53 (Drosophila melanogaster OX%3D7227)		ANN08407	1.15324	0.00429793	86.0483	82.5034	46.757	219.153	114.723	147.489	up	Protein of unknown function
ANN08356	2.32805	3.06224e-19	4445.62	5651.9	5554.27	33954.8	20652.7	23981.9	up	Similar to RpL18A: 60S ribosomal protein L18a (Spodoptera frugiperda OX%3D7108)		ANN08408	1.42376	0.00575113	44.7004	60.9256	37.9901	221.543	95.9379	68.4481	up	Similar to R3hcc1l: Coiled-coil domain-containing protein R3HCC1L (Mus musculus OX%3D10090)
ANN08357	2.5643	1.75105e-29	3781.87	4821.68	4574.01	30743.8	22924.4	24269.5	up	Similar to RpL10A: 60S ribosomal protein L10a (Spodoptera frugiperda OX%3D7108)		ANN08418	2.66889	1.18953e-29	163.157	194.2	118.354	1134.01	1039.22	859.676	up	Similar to LRWD1: Leucine-rich repeat and WD repeat-containing protein 1 (Mus musculus OX%3D10090)
ANN08358	1.14628	0.0231847	45.3438	51.5027	29.3305	80.5506	140.196	59.9548	up	Similar to DNApol-epsilon255: DNA polymerase epsilon catalytic subunit 1 (Drosophila melanogaster OX%3D7227)		ANN08420	2.19233	0.0375191	0	7.61569	7.30579	15.9384	30.1903	20.3715	up	Protein of unknown function
ANN08362	2.44539	1.91054e-23	6385.76	6865.31	6420.29	45657.8	33421.2	28068.6	up	Similar to RpL4: 60S ribosomal protein L4 (Drosophila melanogaster OX%3D7227)		ANN08421	1.26826	0.0406823	21.2327	21.5778	8.76694	36.6582	45.6208	43.1875	up	Similar to Nup133: Nuclear pore complex protein Nup133 (Mus musculus OX%3D10090)
ANN08370	1.24728	1.88984e-07	235.402	216.311	231.557	549.51	498.992	573.621	up	Protein of unknown function		ANN08422	2.06555	0.000467016	8.94009	15.2314	18.995	35.8613	75.8111	66.8184	up	Protein of unknown function
ANN08373	1.10947	0.012855	56.921	29.8715	43.2239	75.0334	94.3501	110.997	up	Similar to CFDP2: Craniofacial development protein 2 (Bos taurus OX%3D9913)		ANN08423	2.42342	0.000623632	4.47004	10.1543	5.84463	31.8767	37.5701	39.9281	up	Protein of unknown function
ANN08378	1.45837	0.00021346	53.0619	30.9016	49.3987	112.55	110.961	141.785	up	Similar to pol: RNA-directed DNA polymerase from mobile element jockey (Drosophila melanogaster OX%3D7227)		ANN08424	1.6937	4.24745e-05	51.4055	38.0785	73.0579	106.787	234.813	181.714	up	Similar to Nup133: Nuclear pore complex protein Nup133 (Drosophila melanogaster OX%3D7227)
ANN08379	1.44329	5.54316e-05	90.6876	78.2841	149.74	306.754	220.593	332.992	up	Similar to DPH5: Diphthine methyl ester synthase (Homo sapiens OX%3D9606)		ANN08435	2.74825	7.42566e-09	27.9378	10.1543	17.5339	86.0672	136.192	154.823	up	Similar to SAK: Serine/threonine-protein kinase PLK4 (Culex quinquefasciatus OX%3D7176)
ANN08386	1.80827	9.49928e-06	27.9781	44.2923	40.1365	130.205	97.0078	165.281	up	Similar to DPH5: Diphthine methyl ester synthase (Homo sapiens OX%3D9606)		ANN08437	3.84057	0.00050853	2.23502	2.53856	0	25.5014	21.4686	24.4458	up	Protein of unknown function
ANN08396	1.08364	6.75062e-05	218.036	210.131	220.751	543.992	457.797	374.312	up	Similar to Klhl25: Kelch-like protein 25 (Mus musculus OX%3D10090)		ANN08440	4.82483	4.87278e-30	8.94009	12.6928	48.2182	765.042	576.298	581.809	up	Similar to Rnf216: E3 ubiquitin-protein ligase RNF216 (Mus musculus OX%3D10090)
ANN08397	1.62183	2.25134e-09	185.234	213.221	243.906	785.644	536.865	651.4	up	Similar to EEF1E1: Eukaryotic translation elongation factor 1 epsilon-1 (Cricetulus griseus OX%3D10029)		ANN08443	4.49765	4.86632e-10	4.47004	0	5.84463	87.661	57.6969	84.7453	up	Protein of unknown function
ANN08401	1.68988	4.36877e-07	51.1324	49.4426	71.0107	166.618	205.311	175.813	up	Similar to R3hcc1l: Coiled-coil domain-containing protein R3HCC1L (Mus musculus OX%3D10090)		ANN08456	1.16911	0.0027881	54.758	50.7713	81.8248	103.599	181.812	133.637	up	Similar to shg: DE-cadherin (Drosophila melanogaster OX%3D7227)
ANN08407	2.00451	3.72717e-08	33.7667	58.713	52.4861	174.342	168.767	235.768	up	Protein of unknown function		ANN08457	1.45478	0.00286945	31.2903	25.3856	32.1455	62.1596	118.748	61.9293	up	Similar to shg: DE-cadherin (Drosophila melanogaster OX%3D7227)
ANN08418	3.26547	3.04228e-37	151.468	185.41	114.235	1347.29	1455.78	1558.01	up	Similar to LRWD1: Leucine-rich repeat and WD repeat-containing protein 1 (Mus musculus OX%3D10090)		ANN08460	1.67032	0.00084037	73.7557	24.1164	35.0678	207.199	123.445	95.3385	up	Protein of unknown function
ANN08421	1.49794	0.0114739	10.6124	22.6612	13.8934	43.0339	37.2085	53.4732	up	Similar to Nup133: Nuclear pore complex protein Nup133 (Mus musculus OX%3D10090)		ANN08461	1.43782	0.00211861	29.0553	49.502	27.762	128.304	93.9252	66.0036	up	Similar to IntS11: Integrator complex subunit 11 (Drosophila melanogaster OX%3D7227)
ANN08424	1.53644	0.00883938	53.0619	55.6229	9.26226	77.2403	140.196	129.632	up	Similar to Nup133: Nuclear pore complex protein Nup133 (Drosophila melanogaster OX%3D7227)		ANN08464	1.56382	3.7465e-05	44.7004	35.5399	45.2959	157.79	102.647	110.821	up	Similar to METTL25: Methyltransferase-like protein 25 (Homo sapiens OX%3D9606)
ANN08435	3.28112	4.15064e-14	19.2952	14.4207	9.26226	121.378	136.21	170.952	up	Similar to SAK: Serine/threonine-protein kinase PLK4 (Culex quinquefasciatus OX%3D7176)		ANN08470	2.85348	0.00551838	2.23502	7.61569	0	31.0798	20.1268	21.1863	up	Protein of unknown function
ANN08440	4.14227	3.58217e-38	33.7667	63.8633	41.6802	1001.92	681.713	784.273	up	Similar to Rnf216: E3 ubiquitin-protein ligase RNF216 (Mus musculus OX%3D10090)		ANN08484	5.44809	0.00897207	0	0	0	25.5014	2.01268	3.25944	up	Similar to TY3B-I: Transposon Ty3-I Gag-Pol polyprotein (Saccharomyces cerevisiae (strain ATCC 204508 / S288c) OX%3D559292)
ANN08443	4.78359	9.43111e-15	3.85905	4.12021	3.08742	113.654	85.7124	110.997	up	Protein of unknown function		ANN08499	1.40908	1.33038e-06	165.392	99.004	170.955	405.631	311.295	439.209	up	Similar to Dis3: Exosome complex exonuclease RRP44 (Mus musculus OX%3D10090)
ANN08460	1.74087	7.10179e-06	40.52	52.5327	94.1663	237.238	199.996	179.864	up	Protein of unknown function		ANN08503	1.72412	0.00033969	17.8802	20.3085	36.5289	102.006	69.773	72.5224	up	Similar to DIS3: Exosome complex exonuclease RRP44 (Homo sapiens OX%3D9606)
ANN08461	1.15932	0.0183129	54.0267	31.9317	21.6119	75.0334	73.0881	95.6035	up	Similar to IntS11: Integrator complex subunit 11 (Drosophila melanogaster OX%3D7227)		ANN08510	1.3828	0.00193398	39.1129	45.6942	20.4562	76.5042	97.9506	101.857	up	Protein of unknown function
ANN08464	1.17187	0.00241794	65.6038	48.4125	81.8166	112.55	148.169	176.623	up	Similar to METTL25: Methyltransferase-like protein 25 (Homo sapiens OX%3D9606)		ANN08513	2.73803	2.65311e-21	42.4654	48.2327	33.6066	260.592	283.788	288.46	up	Similar to FANCL: E3 ubiquitin-protein ligase FANCL (Homo sapiens OX%3D9606)
ANN08484	4.27131	0.0055745	0	2.06011	0	19.8618	7.97325	15.3938	up	Similar to TY3B-I: Transposon Ty3-I Gag-Pol polyprotein (Saccharomyces cerevisiae (strain ATCC 204508 / S288c) OX%3D559292)		ANN08520	1.32838	0.000147417	39.1129	54.5791	52.6017	115.553	128.141	122.229	up	Similar to GVQW3: Protein GVQW3 (Homo sapiens OX%3D9606)
ANN08491	2.91922	4.26895e-06	7.7181	12.3606	6.17484	33.103	65.7793	102.085	up	Protein of unknown function		ANN08521	1.20059	3.27805e-12	1753.37	1330.21	1595.58	3690.53	3662.41	3402.85	up	Similar to kra: Protein krasavietz (Drosophila melanogaster OX%3D7227)
ANN08499	1.15011	3.97458e-05	163.045	135.967	157.458	363.029	366.105	283.57	up	Similar to Dis3: Exosome complex exonuclease RRP44 (Mus musculus OX%3D10090)		ANN08548	3.87408	0.0254122	2.23502	0	0	11.1569	19.4559	4.88915	up	Similar to Tf2-6: Transposon Tf2-6 polyprotein (Schizosaccharomyces pombe (strain 972 / ATCC 24843) OX%3D284812)
ANN08503	1.31753	0.0108176	25.0838	37.0819	20.0682	94.8952	49.8328	63.1956	up	Similar to DIS3: Exosome complex exonuclease RRP44 (Homo sapiens OX%3D9606)		ANN08562	2.32216	4.3934e-11	29.0553	43.1556	30.6843	205.605	151.622	157.268	up	Protein of unknown function
ANN08513	2.79714	6.2345e-20	40.52	49.4426	43.2239	335.444	264.446	327.321	up	Similar to FANCL: E3 ubiquitin-protein ligase FANCL (Homo sapiens OX%3D9606)		ANN08564	2.38638	3.11502e-07	16.7627	22.8471	55.524	186.479	187.85	115.71	up	Similar to Transferrin (Blaberus discoidalis OX%3D6981)
ANN08520	1.44181	0.00109242	25.0838	25.7513	32.4179	62.8957	79.068	81.8302	up	Similar to GVQW3: Protein GVQW3 (Homo sapiens OX%3D9606)		ANN08565	1.06378	0.00055217	112.869	105.35	92.0529	276.531	192.547	180.899	up	Similar to ZFYVE19: Abscission/NoCut checkpoint regulator (Homo sapiens OX%3D9606)
ANN08521	1.17069	6.20021e-07	1316.9	1825.25	1457.26	3504.5	3702.91	3147.63	up	Similar to kra: Protein krasavietz (Drosophila melanogaster OX%3D7227)		ANN08575	1.29069	2.10671e-07	471.59	454.403	417.891	1444.81	800.377	1044.65	up	Similar to DNAJC21: DnaJ homolog subfamily C member 21 (Bos taurus OX%3D9913)
ANN08548	5.16881	0.0099424	0	0	0	2.20687	9.96656	10.5326	up	Similar to Tf2-6: Transposon Tf2-6 polyprotein (Schizosaccharomyces pombe (strain 972 / ATCC 24843) OX%3D284812)		ANN08591	1.35699	1.12635e-05	195.564	248.779	159.266	725.196	391.802	431.06	up	Similar to Dnai1: Dynein intermediate chain 1%2C axonemal (Mus musculus OX%3D10090)
ANN08562	2.20622	3.8447e-10	32.8019	41.2021	64.8358	201.928	215.278	212.272	up	Protein of unknown function		ANN08601	1.87214	1.44549e-12	106.164	76.1569	121.276	413.601	341.485	354.464	up	Similar to NLE1: Notchless protein homolog 1 (Pongo abelii OX%3D9601)
ANN08564	2.47267	1.06275e-07	54.9914	17.5109	29.3305	233.928	209.298	126.391	up	Similar to Transferrin (Blaberus discoidalis OX%3D6981)		ANN08645	1.26449	1.19723e-07	786.728	613.063	682.36	2201.89	1339.78	1462.67	up	Similar to CG5380: Probable DNA-directed RNA polymerase III subunit RPC6 (Drosophila melanogaster OX%3D7227)
ANN08565	1.20199	5.888e-05	114.807	120.516	137.39	300.134	228.566	327.321	up	Similar to ZFYVE19: Abscission/NoCut checkpoint regulator (Homo sapiens OX%3D9606)		ANN08663	3.07748	1.82823e-07	6.70507	7.61569	8.76694	72.5196	74.4693	46.447	up	Protein of unknown function
ANN08575	1.3239	2.73065e-08	500.711	430.562	441.501	1315.29	988.018	1136.71	up	Similar to DNAJC21: DnaJ homolog subfamily C member 21 (Bos taurus OX%3D9913)		ANN08668	3.92411	2.75304e-12	6.70507	6.34641	5.84463	120.335	75.8111	92.079	up	Similar to Clvs2: Clavesin-2 (Mus musculus OX%3D10090)
ANN08576	1.48601	0.030782	12.5419	32.9617	6.17484	65.1025	42.524	40.51	up	Similar to Rnf38: E3 ubiquitin-protein ligase RNF38 (Mus musculus OX%3D10090)		ANN08679	4.1314	3.39587e-23	10.0576	10.1543	11.6893	200.027	184.496	171.935	up	Similar to CSAD: Cysteine sulfinic acid decarboxylase (Homo sapiens OX%3D9606)
ANN08601	1.77284	2.79009e-09	103.23	108.156	80.2729	391.719	275.077	336.233	up	Similar to NLE1: Notchless protein homolog 1 (Pongo abelii OX%3D9601)		ANN08683	1.08783	0.0190874	43.5829	26.6549	29.2231	59.7689	78.4947	74.1522	up	Similar to GTF2H3: General transcription factor IIH subunit 3 (Bos taurus OX%3D9913)
ANN08619	4.11749	0.000918246	1.92952	1.03005	0	19.8618	14.6176	22.6856	up	Protein of unknown function		ANN08684	2.82587	7.78917e-09	29.0553	20.3085	20.4562	277.328	92.5834	127.933	up	Similar to pol: RNA-directed DNA polymerase from mobile element jockey (Drosophila melanogaster OX%3D7227)
ANN08634	2.76187	4.39192e-07	22.1895	36.0519	6.17484	226.204	118.934	103.706	up	Similar to Spec2: CDC42 small effector protein homolog (Drosophila melanogaster OX%3D7227)		ANN08715	5.54354	0.00478612	0	0	0	1.59384	14.0888	17.112	up	Similar to POL: Retrovirus-related Pol polyprotein from transposon 412 (Drosophila melanogaster OX%3D7227)
ANN08663	4.99412	3.56375e-09	1.92952	3.09016	0	63.9991	53.8194	59.1446	up	Protein of unknown function		ANN08726	2.23722	6.06275e-06	22.3502	31.7321	17.5339	64.5504	108.014	166.231	up	Protein of unknown function
ANN08668	4.14477	6.32653e-11	7.7181	6.18032	0	119.171	68.437	81.02	up	Similar to Clvs2: Clavesin-2 (Mus musculus OX%3D10090)		ANN08727	1.03588	0.00186816	72.6382	109.158	116.893	156.196	232.129	221.642	up	Similar to METTL25: Methyltransferase-like protein 25 (Homo sapiens OX%3D9606)
ANN08679	2.79953	3.90631e-16	34.7314	30.9016	24.6994	199.721	241.855	193.638	up	Similar to CSAD: Cysteine sulfinic acid decarboxylase (Homo sapiens OX%3D9606)		ANN08739	2.17154	4.02051e-23	645.921	620.679	610.764	3580.55	2096.55	2782.74	up	Similar to AKR1B10: Aldo-keto reductase family 1 member B10 (Homo sapiens OX%3D9606)
ANN08683	1.10896	0.0330102	23.1543	28.8415	35.5053	62.8957	81.7258	42.1304	up	Similar to GTF2H3: General transcription factor IIH subunit 3 (Bos taurus OX%3D9913)		ANN08751	4.70811	0.0428344	0	0	0	12.7507	4.02537	1.62972	up	Protein of unknown function
ANN08684	1.44217	3.72945e-06	75.2514	80.3442	69.467	206.342	175.411	231.717	up	Similar to pol: RNA-directed DNA polymerase from mobile element jockey (Drosophila melanogaster OX%3D7227)		ANN08753	4.87329	0.0285105	0	0	0	9.56302	1.34179	9.77831	up	Similar to Transposon TX1 uncharacterized 149 kDa protein (Xenopus laevis OX%3D8355)
ANN08733	5.48523	0.0045787	0	0	0	14.3446	12.6243	1.6204	up	Protein of unknown function		ANN08774	1.86887	9.8851e-14	130.749	138.352	165.111	605.658	406.562	571.216	up	Similar to eIF3-S5: Eukaryotic translation initiation factor 3 subunit F (Anopheles gambiae OX%3D7165)
ANN08739	2.07225	2.45739e-16	534.478	797.261	744.068	3330.16	2508.25	2887.55	up	Similar to AKR1B10: Aldo-keto reductase family 1 member B10 (Homo sapiens OX%3D9606)		ANN08783	2.03732	7.88613e-07	35.7603	16.5007	32.1455	105.193	122.774	118.969	up	Similar to WDR77: Methylosome protein 50 (Pongo abelii OX%3D9601)
ANN08774	1.61705	2.32681e-08	172.692	144.207	162.09	630.06	427.898	413.202	up	Similar to eIF3-S5: Eukaryotic translation initiation factor 3 subunit F (Anopheles gambiae OX%3D7165)		ANN08791	1.00771	0.0267772	67.0507	72.3491	103.742	87.661	246.889	152.379	up	Similar to eIF3-S5: Eukaryotic translation initiation factor 3 subunit F (Aedes aegypti OX%3D7159)
ANN08783	2.22032	1.73955e-06	21.2248	19.571	12.3497	86.0678	97.0078	68.867	up	Similar to WDR77: Methylosome protein 50 (Pongo abelii OX%3D9601)		ANN08805	1.18051	0.00322542	69.2857	76.1569	94.9752	105.193	252.927	184.973	up	Similar to eIF3f1: Eukaryotic translation initiation factor 3 subunit F-1 (Drosophila willistoni OX%3D7260)
ANN08791	2.23903	8.2655e-07	13.5067	45.3223	32.4179	155.584	132.223	140.975	up	Similar to eIF3-S5: Eukaryotic translation initiation factor 3 subunit F (Aedes aegypti OX%3D7159)		ANN08828	3.59426	2.77921e-05	2.23502	1.26928	5.84463	31.0798	34.8865	43.1875	up	Similar to RTCA: RNA 3'-terminal phosphate cyclase (Pongo abelii OX%3D9601)
ANN08805	1.75805	0.000280767	18.3305	37.0819	27.7868	130.205	68.437	83.4506	up	Similar to eIF3f1: Eukaryotic translation initiation factor 3 subunit F-1 (Drosophila willistoni OX%3D7260)		ANN08844	3.13469	7.01437e-05	1.11751	13.9621	2.92231	35.8613	60.3805	61.1144	up	Similar to RTCA: RNA 3'-terminal phosphate cyclase (Pongo abelii OX%3D9601)
ANN08806	2.57464	0.0268064	2.89429	2.06011	1.54371	16.5515	7.97325	15.3938	up	Similar to eIF3-S5: Eukaryotic translation initiation factor 3 subunit F (Aedes aegypti OX%3D7159)		ANN08854	2.28033	0.0111539	2.23502	16.5007	5.84463	48.612	13.4179	57.0401	up	Similar to Ttpal: Alpha-tocopherol transfer protein-like (Mus musculus OX%3D10090)
ANN08828	4.74431	2.49414e-05	1.92952	1.03005	0	34.2064	27.2419	27.5468	up	Similar to RTCA: RNA 3'-terminal phosphate cyclase (Pongo abelii OX%3D9601)		ANN08855	1.23044	0.00692665	36.8779	45.6942	45.2959	148.227	72.4566	79.0413	up	Protein of unknown function
ANN08844	7.12043	6.32247e-07	0	0	0	33.103	27.2419	28.357	up	Similar to RTCA: RNA 3'-terminal phosphate cyclase (Pongo abelii OX%3D9601)		ANN08856	1.30279	5.26282e-05	107.281	68.5412	84.7471	267.765	196.572	180.084	up	Similar to sptl-1: Serine palmitoyltransferase 1 (Caenorhabditis elegans OX%3D6239)
ANN08856	1.06278	0.000177938	146.644	139.057	143.565	339.857	251.157	307.066	up	Similar to sptl-1: Serine palmitoyltransferase 1 (Caenorhabditis elegans OX%3D6239)		ANN08857	1.14661	6.82427e-05	101.693	86.3112	83.286	174.525	223.408	203.715	up	Similar to NEK2: Serine/threonine-protein kinase Nek2 (Homo sapiens OX%3D9606)
ANN08857	2.43565	3.93726e-14	38.5905	35.0218	37.049	196.411	201.324	200.929	up	Similar to NEK2: Serine/threonine-protein kinase Nek2 (Homo sapiens OX%3D9606)		ANN08864	2.0228	0.0224775	6.70507	11.4235	2.92231	17.5322	48.9753	19.5566	up	Similar to Iqca1: Dynein regulatory complex protein 11 (Mus musculus OX%3D10090)
ANN08917	1.0541	0.000139682	664.721	980.611	926.226	2161.63	1481.69	1695.75	up	Similar to CRYZ: Quinone oxidoreductase (Homo sapiens OX%3D9606)		ANN08918	1.5194	0.00119548	20.1152	30.4628	21.9174	58.972	70.4439	78.2264	up	Similar to CRYZ: Quinone oxidoreductase (Cavia porcellus OX%3D10141)
ANN08918	1.76659	0.00604669	5.78857	16.4809	12.3497	35.3099	42.524	38.8896	up	Similar to CRYZ: Quinone oxidoreductase (Cavia porcellus OX%3D10141)		ANN08931	1.93885	1.50277e-20	212.327	229.74	185.567	796.122	705.11	908.568	up	Similar to BRAFLDRAFT_56888: Alpha-L-fucosidase (Branchiostoma floridae OX%3D7739)
ANN08931	1.72419	6.09366e-10	300.041	295.625	299.48	1287.71	929.548	742.143	up	Similar to BRAFLDRAFT_56888: Alpha-L-fucosidase (Branchiostoma floridae OX%3D7739)		ANN08936	1.82143	0.000491198	54.758	30.4628	14.6116	155.399	73.7984	127.933	up	Protein of unknown function
ANN08936	1.34414	0.00156715	85.8638	75.1939	78.7292	325.513	145.512	140.165	up	Protein of unknown function		ANN08937	1.66594	6.41615e-14	235.795	272.896	207.484	641.519	750.731	882.492	up	Similar to Fuca1: Tissue alpha-L-fucosidase (Rattus norvegicus OX%3D10116)
ANN08937	1.54747	3.06866e-08	279.781	236.912	213.032	903.712	609.953	625.474	up	Similar to Fuca1: Tissue alpha-L-fucosidase (Rattus norvegicus OX%3D10116)		ANN08945	2.15518	0.00560128	8.94009	10.1543	2.92231	47.8151	24.1522	27.7052	up	Similar to VASN: Vasorin (Homo sapiens OX%3D9606)
ANN08939	2.91891	0.00235977	1.92952	4.12021	3.08742	11.0343	31.2285	25.9264	up	Similar to CalpC: Calpain-C (Drosophila melanogaster OX%3D7227)		ANN08952	1.77359	5.11887e-07	50.288	38.0785	48.2182	193.651	124.786	149.119	up	Protein of unknown function
ANN08945	2.99486	7.40766e-05	14.4714	2.06011	1.54371	50.7579	55.8127	45.3712	up	Similar to VASN: Vasorin (Homo sapiens OX%3D9606)		ANN08959	1.3021	2.91008e-05	134.101	82.5034	149.038	359.41	244.206	297.423	up	Similar to RIOK2: Serine/threonine-protein kinase RIO2 (Homo sapiens OX%3D9606)
ANN08952	1.79287	1.64324e-07	48.2381	49.4426	80.2729	182.066	210.627	215.513	up	Protein of unknown function		ANN08979	1.57281	1.14127e-30	4953.93	5294.18	4963.55	15308	14737.5	15206.9	up	Similar to ABCF2: ATP-binding cassette sub-family F member 2 (Homo sapiens OX%3D9606)
ANN08958	1.23895	0.00426798	41.4848	30.9016	29.3305	91.5849	82.3902	68.0568	up	Protein of unknown function		ANN08983	1.40371	0.0108918	45.8179	31.7321	14.6116	53.3935	112.71	79.8562	up	Similar to Pepck: Phosphoenolpyruvate carboxykinase [GTP] (Drosophila melanogaster OX%3D7227)
ANN08959	1.27339	0.000105881	160.15	111.246	151.284	449.097	281.057	292.482	up	Similar to RIOK2: Serine/threonine-protein kinase RIO2 (Homo sapiens OX%3D9606)		ANN09005	1.11141	0.00402793	56.9931	64.7334	67.2132	176.119	140.888	90.4493	up	Similar to ccdc93: Coiled-coil domain-containing protein 93 (Xenopus tropicalis OX%3D8364)
ANN08963	1.35833	0.000311292	93.5819	53.5628	97.2537	267.031	168.103	190.397	up	Similar to RIOK2: Serine/threonine-protein kinase RIO2 (Homo sapiens OX%3D9606)		ANN09065	1.01421	0.0163966	64.8156	33.0013	75.9802	123.522	128.812	97.7831	up	Similar to ZNF180: Zinc finger protein 180 (Homo sapiens OX%3D9606)
ANN08979	2.2336	3.6291e-26	3437.45	4005.88	4294.6	18083.1	16823.5	20289	up	Similar to ABCF2: ATP-binding cassette sub-family F member 2 (Homo sapiens OX%3D9606)		ANN09067	2.61653	0.000303067	4.47004	12.6928	4.38347	60.5658	29.5194	42.3727	up	Similar to ZNF271: Zinc finger protein 271 (Pongo abelii OX%3D9601)
ANN08987	1.81755	0.00663688	21.2248	12.3606	12.3497	19.8618	70.4303	72.1078	up	Protein of unknown function		ANN09079	2.72822	4.18889e-05	22.3502	15.2314	0	94.0364	72.4566	88.8196	up	Similar to ZNF271: Zinc finger protein 271 (Pongo abelii OX%3D9601)
ANN09025	1.10181	0.000121281	253.732	382.15	351.966	846.333	671.082	601.978	up	Similar to CG12262: Probable medium-chain specific acyl-CoA dehydrogenase%2C mitochondrial (Drosophila melanogaster OX%3D7227)		ANN09086	2.27919	9.91121e-12	31.2903	35.5399	45.2959	162.571	169.736	208.604	up	Protein of unknown function
ANN09032	1.03694	0.00430132	155.327	169.959	89.5352	347.581	221.258	288.431	up	Similar to Nudt19: Nucleoside diphosphate-linked moiety X motif 19 (Mus saxicola OX%3D10094)		ANN09087	2.41199	8.43854e-08	21.2327	11.4235	21.9174	90.0518	88.5581	111.636	up	Protein of unknown function
ANN09065	1.82757	7.68201e-08	44.379	52.5327	41.6802	175.446	141.525	177.434	up	Similar to ZNF180: Zinc finger protein 180 (Homo sapiens OX%3D9606)		ANN09088	2.11201	7.46547e-09	69.2857	31.7321	35.0678	192.854	185.838	215.123	up	Similar to Ipo4: Importin-4 (Mus musculus OX%3D10090)
ANN09067	1.6384	0.00012496	27.0133	28.8415	23.1557	95.9987	75.0814	76.969	up	Similar to ZNF271: Zinc finger protein 271 (Pongo abelii OX%3D9601)		ANN09162	1.20973	0.000624363	96.1059	76.1569	77.4413	268.562	148.268	162.157	up	Similar to ACTR6: Actin-related protein 6 (Gallus gallus OX%3D9031)
ANN09079	2.4104	2.88715e-07	17.3657	16.4809	12.3497	97.1021	66.4437	85.8812	up	Similar to ZNF271: Zinc finger protein 271 (Pongo abelii OX%3D9601)		ANN09198	3.75282	4.8355e-25	12.2926	20.3085	17.5339	233.497	216.028	220.827	up	Similar to CEP350: Centrosome-associated protein 350 (Homo sapiens OX%3D9606)
ANN09082	5.29141	0.00524824	0	0	0	4.41373	10.631	9.72239	up	Protein of unknown function		ANN09199	2.92887	7.11572e-06	11.1751	7.61569	2.92231	40.6428	72.4566	56.2253	up	Protein of unknown function
ANN09086	2.2715	7.34713e-09	44.379	30.9016	23.1557	124.688	176.74	179.864	up	Protein of unknown function		ANN09204	1.20419	0.00253143	105.046	55.8484	125.66	157.79	301.232	199.64	up	Similar to SHQ1: Protein SHQ1 homolog (Homo sapiens OX%3D9606)
ANN09087	1.74096	0.000178813	29.9076	39.142	16.9808	97.1021	120.928	73.7282	up	Protein of unknown function		ANN09205	1.08296	1.68721e-06	284.965	291.935	242.552	508.434	539.399	690.185	up	Similar to FKBP14: Peptidyl-prolyl cis-trans isomerase FKBP14 (Pongo abelii OX%3D9601)
ANN09122	1.031	0.0483882	30.8724	19.571	27.7868	65.1025	50.4972	44.561	up	Similar to EH1: Juvenile hormone epoxide hydrolase 1 (Ctenocephalides felis OX%3D7515)		ANN09208	1.08726	0.000384988	79.3433	78.6955	62.8298	163.368	159.673	147.489	up	Similar to Nup160: Nuclear pore complex protein Nup160 homolog (Drosophila melanogaster OX%3D7227)
ANN09197	1.01031	0.000786805	737.078	1148.51	1273.56	2478.31	1689.66	2192.4	up	Similar to psmb1-B: Proteasome subunit beta type-1-B (Carassius auratus OX%3D7957)		ANN09213	1.7942	0.0114366	7.82258	13.9621	7.30579	23.9076	35.5574	41.5578	up	Similar to ZZZ3: ZZ-type zinc finger-containing protein 3 (Homo sapiens OX%3D9606)
ANN09198	2.96596	3.9979e-15	30.8724	41.2021	30.8742	182.066	360.125	263.315	up	Similar to CEP350: Centrosome-associated protein 350 (Homo sapiens OX%3D9606)		ANN09214	1.80873	0.00564137	13.4101	7.61569	10.2281	43.0336	32.8738	34.2241	up	Protein of unknown function
ANN09199	3.00817	2.52464e-05	5.78857	13.3907	3.08742	28.6893	99.6656	55.0936	up	Protein of unknown function		ANN09222	2.39085	0.0466662	1.11751	6.34641	1.46116	7.96918	20.7977	17.9269	up	Similar to Zzz3: ZZ-type zinc finger-containing protein 3 (Mus musculus OX%3D10090)
ANN09204	1.18067	0.00055474	108.053	107.126	108.06	165.515	261.788	303.825	up	Similar to SHQ1: Protein SHQ1 homolog (Homo sapiens OX%3D9606)		ANN09226	1.65595	0.0007314	34.6428	20.3085	18.995	84.4734	56.3551	94.5236	up	Similar to CFDP2: Craniofacial development protein 2 (Bos taurus OX%3D9913)
ANN09214	1.33068	0.0353436	14.4714	16.4809	30.8742	78.3437	45.1817	29.9774	up	Protein of unknown function		ANN09229	1.77193	0.000353603	17.8802	34.2706	16.0727	83.6764	89.229	60.2996	up	Protein of unknown function
ANN09225	1.73144	0.0403486	4.82381	4.12021	12.3497	22.0687	28.5708	17.0142	up	Protein of unknown function		ANN09270	1.03092	1.10713e-05	144.159	180.238	179.722	361.801	334.776	331.648	up	Similar to pol: Retrovirus-related Pol polyprotein from transposon 17.6 (Drosophila melanogaster OX%3D7227)
ANN09229	1.50258	0.00103769	41.4848	18.541	46.3113	88.2746	99.6656	110.187	up	Protein of unknown function		ANN09271	1.15009	0.000192708	98.341	71.0798	77.4413	190.464	156.318	202.9	up	Similar to ATXN7: Ataxin-7 (Homo sapiens OX%3D9606)
ANN09248	2.69402	0.0124408	1.92952	2.06011	3.08742	15.4481	14.6176	14.5836	up	Similar to LSM8: U6 snRNA-associated Sm-like protein LSm8 (Pongo abelii OX%3D9601)		ANN09276	5.69284	0.00115012	0	0	0	11.9538	15.4306	8.96345	up	Protein of unknown function
ANN09251	2.51078	0.00136793	7.7181	4.12021	3.08742	34.2064	20.5976	33.2182	up	Similar to LSM8: U6 snRNA-associated Sm-like protein LSm8 (Pongo abelii OX%3D9601)		ANN09277	3.87131	4.90835e-08	10.0576	5.07713	0	45.4244	90.5708	96.1533	up	Similar to ZSCAN10: Zinc finger and SCAN domain-containing protein 10 (Homo sapiens OX%3D9606)
ANN09264	1.6931	0.00934332	10.6124	12.3606	7.71855	39.7236	27.2419	34.0284	up	Similar to UPF0428 protein CXorf56 homolog (Bos taurus OX%3D9913)		ANN09279	1.52749	5.26546e-11	138.571	128.198	141.732	446.274	354.903	376.465	up	Similar to Polr3b: DNA-directed RNA polymerase III subunit RPC2 (Mus musculus OX%3D10090)
ANN09271	1.665	3.92505e-07	56.921	50.4726	71.0107	164.411	190.029	206.601	up	Similar to ATXN7: Ataxin-7 (Homo sapiens OX%3D9606)		ANN09281	1.25124	0.0141026	24.5852	19.0392	40.9124	59.7689	81.8491	57.855	up	Similar to Ccdc39: Coiled-coil domain-containing protein 39 (Mus musculus OX%3D10090)
ANN09276	4.29893	0.0287455	0.964762	0	0	2.20687	14.6176	7.2918	up	Protein of unknown function		ANN09283	1.76717	2.46215e-27	2003.7	1577.72	1713.94	6335.5	5725.41	5968.84	up	Similar to CCT8: T-complex protein 1 subunit theta (Gallus gallus OX%3D9031)
ANN09277	2.33789	0.0013329	11.5771	3.09016	6.17484	26.4824	38.5374	41.3202	up	Similar to ZSCAN10: Zinc finger and SCAN domain-containing protein 10 (Homo sapiens OX%3D9606)		ANN09284	1.41369	1.66705e-06	103.929	73.6184	80.3636	259.795	236.826	192.307	up	Similar to CDK7: Cyclin-dependent kinase 7 (Homo sapiens OX%3D9606)
ANN09279	1.32264	4.74636e-06	165.939	138.027	129.672	393.926	401.985	291.672	up	Similar to Polr3b: DNA-directed RNA polymerase III subunit RPC2 (Mus musculus OX%3D10090)		ANN09288	2.76116	1.06101e-19	157.569	111.697	59.9074	838.358	689.009	719.52	up	Similar to qsox2: Sulfhydryl oxidase 2 (Xenopus laevis OX%3D8355)
ANN09281	1.68862	0.00331469	9.64762	17.5109	33.9616	49.6545	76.4103	64.816	up	Similar to Ccdc39: Coiled-coil domain-containing protein 39 (Mus musculus OX%3D10090)		ANN09289	2.93777	1.45182e-14	33.5253	15.2314	20.4562	199.23	165.04	171.935	up	Similar to qsox2: Sulfhydryl oxidase 2 (Xenopus laevis OX%3D8355)
ANN09283	2.11217	8.04459e-21	1255.16	1618.21	1594.65	7327.9	5833.09	6151.85	up	Similar to CCT8: T-complex protein 1 subunit theta (Gallus gallus OX%3D9031)		ANN09298	2.72049	1.12753e-11	15.6452	35.5399	21.9174	180.9	132.166	167.046	up	Similar to F13H10.3: Sodium-coupled neutral amino acid transporter 9 homolog (Caenorhabditis elegans OX%3D6239)
ANN09284	2.05826	1.91725e-14	81.04	76.224	89.5352	346.478	332.219	345.955	up	Similar to CDK7: Cyclin-dependent kinase 7 (Homo sapiens OX%3D9606)		ANN09303	1.36919	0.00722842	32.4078	24.1164	14.6116	67.7381	61.7223	56.2253	up	Similar to ANAPC5: Anaphase-promoting complex subunit 5 (Pongo abelii OX%3D9601)
ANN09288	2.75425	1.79205e-28	109.983	115.366	86.4478	707.3	710.283	698.392	up	Similar to qsox2: Sulfhydryl oxidase 2 (Xenopus laevis OX%3D8355)		ANN09304	1.15704	0.00825704	54.758	30.4628	52.6017	74.9103	129.483	102.672	up	Similar to ANAPC5: Anaphase-promoting complex subunit 5 (Gallus gallus OX%3D9031)
ANN09289	2.77424	2.14743e-13	32.8019	19.571	24.6994	148.963	200.66	179.054	up	Similar to qsox2: Sulfhydryl oxidase 2 (Xenopus laevis OX%3D8355)		ANN09319	1.44074	0.00300031	25.7028	25.3856	27.762	54.1905	97.2797	61.9293	up	Similar to gss: Glutathione synthetase (Xenopus laevis OX%3D8355)
ANN09298	2.05536	2.86217e-08	28.9429	47.3825	60.2047	163.308	201.324	194.448	up	Similar to F13H10.3: Sodium-coupled neutral amino acid transporter 9 homolog (Caenorhabditis elegans OX%3D6239)		ANN09322	1.03869	0.000510982	79.3433	74.8877	74.519	147.43	167.053	155.638	up	Similar to Galk2: N-acetylgalactosamine kinase (Rattus norvegicus OX%3D10116)
ANN09319	2.204	3.31582e-05	12.5419	23.6912	15.4371	99.309	47.175	93.1729	up	Similar to gss: Glutathione synthetase (Xenopus laevis OX%3D8355)		ANN09323	1.00896	0.00792686	64.8156	48.2327	81.8248	162.571	119.419	109.191	up	Similar to cdk9: Cyclin-dependent kinase 9 (Xenopus tropicalis OX%3D8364)
ANN09323	1.12259	0.00327985	54.0267	51.5027	75.6418	133.515	104.317	153.938	up	Similar to cdk9: Cyclin-dependent kinase 9 (Xenopus tropicalis OX%3D8364)		ANN09324	3.52788	0.014604	0	5.07713	0	27.0952	4.02537	27.7052	up	Similar to RTase: Probable RNA-directed DNA polymerase from transposon BS (Drosophila melanogaster OX%3D7227)
ANN09324	2.94309	0.00901427	1.92952	2.06011	3.08742	30.8961	6.64437	16.204	up	Similar to RTase: Probable RNA-directed DNA polymerase from transposon BS (Drosophila melanogaster OX%3D7227)		ANN09335	5.15236	0.0156214	0	0	0	19.126	2.68358	3.25944	up	Similar to tc3a: Transposable element Tc3 transposase (Caenorhabditis elegans OX%3D6239)
ANN09336	1.47896	0.0465985	13.5067	11.3306	10.806	13.2412	45.1817	40.51	up	Similar to CG8202: VPS35 endosomal protein sorting factor-like (Drosophila melanogaster OX%3D7227)		ANN09337	1.55653	4.97425e-07	83.8133	69.8105	87.6694	295.657	181.142	233.05	up	Similar to vps35l: VPS35 endosomal protein sorting factor-like (Danio rerio OX%3D7955)
ANN09353	7.67877	1.21041e-07	0	0	0	79.4472	33.8863	17.8244	up	Similar to Retrovirus-related Pol polyprotein from transposon TNT 1-94 (Nicotiana tabacum OX%3D4097)		ANN09343	1.12109	1.54271e-09	452.592	538.176	426.658	1079.82	1002.99	1001.46	up	Similar to Lrrc59: Leucine-rich repeat-containing protein 59 (Mus musculus OX%3D10090)
ANN09391	2.06041	2.40639e-09	104.194	80.3442	159.002	615.716	373.414	435.077	up	Similar to sno1: Senecionine N-oxygenase (Tyria jacobaeae OX%3D179666)		ANN09344	1.18178	1.84961e-05	205.622	239.894	179.722	620.003	368.992	431.06	up	Similar to Mvd: Diphosphomevalonate decarboxylase (Rattus norvegicus OX%3D10116)
ANN09397	1.76734	1.74171e-18	920.383	931.168	833.604	2981.48	3200.59	2962.9	up	Similar to Ipo7: Importin-7 (Mus musculus OX%3D10090)		ANN09348	2.51948	0.00384374	4.47004	2.53856	7.30579	21.5168	38.9119	20.3715	up	Similar to Xirp2: Xin actin-binding repeat-containing protein 2 (Mus musculus OX%3D10090)
ANN09406	2.10274	0.0034586	11.5771	5.15027	4.63113	30.8961	33.2219	29.9774	up	Similar to Svep1: Sushi%2C von Willebrand factor type A%2C EGF and pentraxin domain-containing protein 1 (Mus musculus OX%3D10090)		ANN09369	1.12614	0.000114734	231.325	211.97	143.193	532.342	329.409	422.097	up	Similar to nero: Deoxyhypusine hydroxylase (Drosophila melanogaster OX%3D7227)
ANN09413	1.04157	0.00173049	73.3219	100.945	74.0981	161.101	164.116	187.156	up	Similar to NAGLU: Alpha-N-acetylglucosaminidase (Homo sapiens OX%3D9606)		ANN09387	1.56912	5.69546e-07	55.8755	68.5412	67.2132	218.356	152.293	197.196	up	Similar to nudcd1: NudC domain-containing protein 1 (Xenopus tropicalis OX%3D8364)
ANN09416	1.47862	2.25516e-07	733.219	947.649	774.943	3062.03	2035.17	1750.03	up	Similar to Tudor-SN: Staphylococcal nuclease domain-containing protein 1 (Drosophila melanogaster OX%3D7227)		ANN09391	1.21558	4.49619e-08	198.917	219.586	214.79	529.154	527.994	412.319	up	Similar to sno1: Senecionine N-oxygenase (Tyria jacobaeae OX%3D179666)
ANN09417	1.74363	3.11451e-14	2079.06	2568.95	2388.12	9144.15	7808.47	6609.61	up	Similar to Snd1: Staphylococcal nuclease domain-containing protein 1 (Mus musculus OX%3D10090)		ANN09397	1.70168	2.2643e-29	868.306	802.186	898.612	2823.48	2776.83	2755.04	up	Similar to Ipo7: Importin-7 (Mus musculus OX%3D10090)
ANN09420	5.67374	1.76491e-125	107.089	130.817	89.5352	5906.68	5087.6	5818.85	up	Similar to KPNA3: Importin subunit alpha-4 (Homo sapiens OX%3D9606)		ANN09400	1.2258	0.000179055	67.0507	93.9269	125.66	218.356	258.294	189.862	up	Similar to Nup153: Nuclear pore complex protein Nup153 (Rattus norvegicus OX%3D10116)
ANN09423	1.03832	0.0018861	136.031	154.508	186.789	436.959	283.05	259.264	up	Similar to CCNB1IP1: E3 ubiquitin-protein ligase CCNB1IP1 (Homo sapiens OX%3D9606)		ANN09406	2.68783	0.00454159	3.35253	2.53856	5.84463	11.9538	31.532	30.9646	up	Similar to Svep1: Sushi%2C von Willebrand factor type A%2C EGF and pentraxin domain-containing protein 1 (Mus musculus OX%3D10090)
ANN09424	2.31091	1.60439e-18	3749.06	4411.72	4859.6	27718.2	16216.9	20666.6	up	Similar to GPSM2: G-protein-signaling modulator 2 (Homo sapiens OX%3D9606)		ANN09413	1.63557	2.36455e-09	67.0507	73.6184	81.8248	215.965	223.408	250.162	up	Similar to NAGLU: Alpha-N-acetylglucosaminidase (Homo sapiens OX%3D9606)
ANN09430	1.76295	6.45546e-10	92.6171	79.3141	103.429	294.617	287.037	349.196	up	Similar to Ldh: L-lactate dehydrogenase (Drosophila melanogaster OX%3D7227)		ANN09416	1.23759	1.20425e-09	1311.96	858.035	989.203	2445.74	2372.95	2635.25	up	Similar to Tudor-SN: Staphylococcal nuclease domain-containing protein 1 (Drosophila melanogaster OX%3D7227)
ANN09431	1.87559	1.6167e-15	1380.57	1419.41	1690.36	6320.46	4453.72	5698.13	up	Protein of unknown function		ANN09417	1.67811	5.67257e-23	3080.98	2329.13	2776.2	8085.53	8822.93	9291.02	up	Similar to Snd1: Staphylococcal nuclease domain-containing protein 1 (Mus musculus OX%3D10090)
ANN09432	1.837	1.82799e-15	1088.25	1094.95	1159.33	4660.9	3211.22	4069.63	up	Similar to Trx-2: Thioredoxin-2 (Drosophila yakuba OX%3D7245)		ANN09420	10.3948	2.58993e-79	6.70507	2.53856	0	5124.98	3998.53	4453.2	up	Similar to KPNA3: Importin subunit alpha-4 (Homo sapiens OX%3D9606)
ANN09455	1.4422	1.27125e-09	223.825	225.582	233.1	668.68	554.141	631.956	up	Similar to TRMT112: Multifunctional methyltransferase subunit TRM112-like protein (Homo sapiens OX%3D9606)		ANN09422	1.45174	5.09077e-06	79.3433	72.3491	61.3686	243.06	161.686	180.084	up	Similar to Ubiquinone biosynthesis protein COQ4 homolog%2C mitochondrial (Bombyx mori OX%3D7091)
ANN09456	2.30009	1.1278e-14	129.278	145.238	80.2729	599.164	507.63	653.831	up	Similar to UCHL5: Ubiquitin carboxyl-terminal hydrolase isozyme L5 (Bos taurus OX%3D9913)		ANN09424	1.45184	4.10489e-21	6104.96	5927.55	5704.36	16816.6	14270.6	17436.3	up	Similar to GPSM2: G-protein-signaling modulator 2 (Homo sapiens OX%3D9606)
ANN09457	5.6963	1.75738e-22	1.92952	2.06011	9.26226	183.17	185.378	236.578	up	Protein of unknown function		ANN09426	5.1439	0.0101157	0	0	0	12.7507	4.02537	8.14859	up	Similar to RTase: Probable RNA-directed DNA polymerase from transposon BS (Drosophila melanogaster OX%3D7227)
ANN09460	1.82653	4.84656e-05	22.1895	55.6229	24.6994	122.481	117.605	126.391	up	Similar to DCAF13: DDB1- and CUL4-associated factor 13 (Homo sapiens OX%3D9606)		ANN09430	1.48609	0.000240756	91.6359	76.1569	64.2909	320.361	120.09	211.863	up	Similar to Ldh: L-lactate dehydrogenase (Drosophila melanogaster OX%3D7227)
ANN09465	2.14525	9.18182e-18	487.205	744.729	578.891	2902.03	2328.19	2782.23	up	Similar to eIF2alpha: Eukaryotic translation initiation factor 2 subunit 1 (Drosophila melanogaster OX%3D7227)		ANN09431	1.47916	8.73648e-20	1366.72	1340.36	1313.58	4124.05	3292.08	3794.8	up	Protein of unknown function
ANN09467	1.2861	5.45553e-06	141.82	192.62	228.469	430.339	459.791	476.397	up	Similar to RANGAP1: Ran GTPase-activating protein 1 (Homo sapiens OX%3D9606)		ANN09432	1.32017	1.63706e-13	1178.97	1189.32	989.203	3119.14	2450.78	2817.78	up	Similar to Trx-2: Thioredoxin-2 (Drosophila yakuba OX%3D7245)
ANN09473	1.94204	7.14237e-16	160.15	157.598	194.507	680.818	626.564	654.641	up	Similar to VPS37A: Vacuolar protein sorting-associated protein 37A (Homo sapiens OX%3D9606)		ANN09440	1.57451	0.0035123	52.523	78.6955	93.5141	391.287	72.4566	204.53	up	Similar to Iswi: Chromatin-remodeling complex ATPase chain Iswi (Drosophila melanogaster OX%3D7227)
ANN09479	3.84621	6.43964e-06	5.78857	0	3.08742	61.7922	35.2152	32.408	up	Protein of unknown function		ANN09455	1.59732	0.000136089	116.221	85.0419	46.757	343.472	148.939	262.385	up	Similar to TRMT112: Multifunctional methyltransferase subunit TRM112-like protein (Homo sapiens OX%3D9606)
ANN09482	6.70693	7.69411e-41	1.92952	2.06011	16.9808	588.13	623.907	665.174	up	Protein of unknown function		ANN09456	1.59467	1.88579e-10	97.2234	109.158	106.664	307.611	280.434	356.908	up	Similar to UCHL5: Ubiquitin carboxyl-terminal hydrolase isozyme L5 (Bos taurus OX%3D9913)
ANN09483	4.96374	4.02539e-05	5.78857	2.06011	44.7676	551.716	480.388	581.723	up	Protein of unknown function		ANN09457	10.2164	3.57368e-16	0	0	0	228.716	290.497	317.795	up	Protein of unknown function
ANN09484	6.21219	5.34769e-16	0	2.06011	4.63113	141.239	119.599	167.711	up	Protein of unknown function		ANN09460	1.70976	2.73157e-05	25.7028	33.0013	61.3686	130.695	132.166	125.488	up	Similar to DCAF13: DDB1- and CUL4-associated factor 13 (Homo sapiens OX%3D9606)
ANN09485	5.95031	2.45329e-39	7.7181	2.06011	13.8934	445.787	407.3	507.995	up	Protein of unknown function		ANN09461	4.21564	0.000116455	1.11751	1.26928	2.92231	12.7507	47.6335	35.0389	up	Similar to DCAF13: DDB1- and CUL4-associated factor 13 (Pongo abelii OX%3D9601)
ANN09486	4.92032	9.30234e-16	0	5.15027	10.806	179.86	121.592	132.873	up	Protein of unknown function		ANN09465	1.89967	1.02588e-28	765.495	653.68	691.127	2834.64	2327.33	2715.92	up	Similar to eIF2alpha: Eukaryotic translation initiation factor 2 subunit 1 (Drosophila melanogaster OX%3D7227)
ANN09487	6.54578	1.92196e-05	9.64762	0	40.1365	1794.18	1259.11	1550.72	up	Protein of unknown function		ANN09467	1.32779	2.14324e-09	176.567	210.701	194.334	553.061	440.107	466.099	up	Similar to RANGAP1: Ran GTPase-activating protein 1 (Homo sapiens OX%3D9606)
ANN09495	2.22003	2.0335e-08	27.0133	26.7814	38.5928	163.308	105.646	157.179	up	Protein of unknown function		ANN09473	1.50727	4.47532e-10	107.281	135.813	119.815	375.349	337.46	317.795	up	Similar to VPS37A: Vacuolar protein sorting-associated protein 37A (Homo sapiens OX%3D9606)
ANN09496	2.12081	3.42036e-16	263.38	346.098	313.373	1624.25	1083.03	1306.85	up	Similar to Uchl5: Ubiquitin carboxyl-terminal hydrolase isozyme L5 (Mus musculus OX%3D10090)		ANN09479	7.9448	3.28332e-09	0	0	0	62.9566	55.0133	55.4104	up	Protein of unknown function
ANN09527	1.56422	0.000210554	32.8019	39.142	24.6994	104.826	107.639	76.1588	up	Similar to DNAH6: Dynein heavy chain 6%2C axonemal (Homo sapiens OX%3D9606)		ANN09480	4.20798	0.0372684	1.11751	0	0	10.3599	2.01268	13.0377	up	Protein of unknown function
ANN09528	2.72313	2.65433e-11	18.3305	25.7513	43.2239	222.893	145.512	195.258	up	Similar to DNAH6: Dynein heavy chain 6%2C axonemal (Homo sapiens OX%3D9606)		ANN09482	9.66857	2.01264e-19	0	0	2.92231	671.802	627.957	770.042	up	Protein of unknown function
ANN09533	2.19622	0.0118545	1.92952	12.3606	4.63113	45.2407	23.2553	19.4448	up	Similar to DNAH6: Dynein heavy chain 6%2C axonemal (Homo sapiens OX%3D9606)		ANN09483	7.8519	5.08575e-09	0	7.61569	0	643.91	498.475	620.922	up	Protein of unknown function
ANN09538	4.10398	0.00847574	0	2.06011	0	15.4481	9.96656	12.9632	up	Similar to Tret1: Facilitated trehalose transporter Tret1 (Apis mellifera ligustica OX%3D7469)		ANN09484	9.49933	7.31187e-14	0	0	0	153.805	154.306	201.27	up	Protein of unknown function
ANN09559	2.41948	3.50318e-22	7536.72	7444.2	9276.15	53274.8	33285	43202.3	up	Similar to RpS4: 40S ribosomal protein S4 (Carabus granulatus OX%3D118799)		ANN09485	9.19347	2.34121e-17	2.23502	0	0	420.773	486.398	572.031	up	Protein of unknown function
ANN09563	1.81457	0.00134818	12.5419	13.3907	13.8934	52.9648	34.5507	52.663	up	Similar to METTL17: Methyltransferase-like protein 17%2C mitochondrial (Homo sapiens OX%3D9606)		ANN09486	6.05021	2.06866e-18	2.23502	5.07713	0	172.134	164.369	165.416	up	Protein of unknown function
ANN09571	3.38771	0.000535941	0	6.18032	1.54371	24.2755	27.9064	29.9774	up	Similar to wat: Fatty acyl-CoA reductase wat (Drosophila melanogaster OX%3D7227)		ANN09487	8.54676	1.55506e-70	3.35253	7.61569	2.92231	1740.47	1553.79	1919.81	up	Protein of unknown function
ANN09572	3.7447	5.44576e-17	7.7181	11.3306	12.3497	146.757	126.908	140.165	up	Similar to CG1139: Proton-coupled amino acid transporter-like protein CG1139 (Drosophila melanogaster OX%3D7227)		ANN09495	3.00343	1.3058e-15	29.0553	63.4641	20.4562	266.968	305.928	336.537	up	Protein of unknown function
ANN09573	6.68714	4.75425e-18	1.92952	4.12021	0	375.167	191.358	119.91	up	Similar to CG1139: Proton-coupled amino acid transporter-like protein CG1139 (Drosophila melanogaster OX%3D7227)		ANN09496	1.07413	2.54513e-09	445.887	437.902	403.279	870.235	976.151	864.565	up	Similar to Uchl5: Ubiquitin carboxyl-terminal hydrolase isozyme L5 (Mus musculus OX%3D10090)
ANN09574	3.03549	1.06782e-27	78.1457	93.7349	120.409	919.16	786.694	673.276	up	Similar to CG1139: Proton-coupled amino acid transporter-like protein CG1139 (Drosophila melanogaster OX%3D7227)		ANN09528	2.38963	9.96515e-14	51.4055	40.617	59.9074	196.839	313.308	283.571	up	Similar to DNAH6: Dynein heavy chain 6%2C axonemal (Homo sapiens OX%3D9606)
ANN09577	2.29073	3.80921e-11	2554.69	4736.19	3819.14	27041.8	12467.5	14852.6	up	Similar to RpS4: 40S ribosomal protein S4 (Carabus granulatus OX%3D118799)		ANN09538	2.96726	0.0259533	4.47004	0	1.46116	17.5322	6.03805	24.4458	up	Similar to Tret1: Facilitated trehalose transporter Tret1 (Apis mellifera ligustica OX%3D7469)
ANN09580	1.53805	2.19042e-06	56.921	64.8934	61.7484	196.411	150.827	186.346	up	Similar to METTL17: Methyltransferase-like protein 17%2C mitochondrial (Bos taurus OX%3D9913)		ANN09559	1.24357	1.90573e-11	13353.1	11520	11326.9	23488.4	33395.8	28833.8	up	Similar to RpS4: 40S ribosomal protein S4 (Carabus granulatus OX%3D118799)
ANN09594	1.97554	5.50828e-11	172.692	165.839	245.45	996.4	663.773	629.525	up	Similar to Creg1: Protein CREG1 (Mus musculus OX%3D10090)		ANN09561	1.55671	0.00370054	15.6452	17.77	26.3008	67.7381	41.5955	65.1887	up	Similar to METTL17: Methyltransferase-like protein 17%2C mitochondrial (Bos taurus OX%3D9913)
ANN09613	4.77862	2.50933e-07	46.3086	29.8715	10.806	1623.15	356.138	426.165	up	Similar to RD19D: Probable cysteine protease RD19D (Arabidopsis thaliana OX%3D3702)		ANN09571	4.65594	4.26294e-06	2.23502	2.53856	0	25.5014	40.2537	60.2996	up	Similar to wat: Fatty acyl-CoA reductase wat (Drosophila melanogaster OX%3D7227)
ANN09615	1.08958	0.000710311	87.7933	125.667	154.371	267.031	251.822	259.264	up	Similar to PEX10: Peroxisome biogenesis factor 10 (Homo sapiens OX%3D9606)		ANN09572	4.27839	1.45182e-14	2.23502	3.80785	20.4562	179.307	162.356	146.675	up	Similar to CG1139: Proton-coupled amino acid transporter-like protein CG1139 (Drosophila melanogaster OX%3D7227)
ANN09641	1.59541	0.0113432	11.5771	20.6011	16.9808	69.5163	25.2486	54.2834	up	Protein of unknown function		ANN09573	3.98064	1.22892e-18	6.70507	11.4235	17.5339	133.882	199.927	215.938	up	Similar to CG1139: Proton-coupled amino acid transporter-like protein CG1139 (Drosophila melanogaster OX%3D7227)
ANN09646	1.17258	0.00118481	90.6876	118.456	86.4478	269.238	248.5	150.697	up	Similar to Venom serine carboxypeptidase (Apis mellifera OX%3D7460)		ANN09574	2.58245	2.37531e-18	69.2857	128.198	92.0529	718.82	441.449	571.216	up	Similar to CG1139: Proton-coupled amino acid transporter-like protein CG1139 (Drosophila melanogaster OX%3D7227)
ANN09654	1.09022	0.000202708	162.08	115.366	155.915	291.306	285.708	344.335	up	Similar to bab1: Protein bric-a-brac 1 (Drosophila melanogaster OX%3D7227)		ANN09576	1.00842	0.0402111	22.3502	59.6563	46.757	95.6302	91.9125	70.0779	up	Similar to WDR81: WD repeat-containing protein 81 (Homo sapiens OX%3D9606)
ANN09655	2.33039	3.08215e-10	47.2733	65.9234	95.71	447.994	242.52	350.816	up	Protein of unknown function		ANN09577	2.50541	9.68319e-06	2608.27	2382.44	2467.89	23251.7	5356.42	13743.4	up	Similar to RpS4: 40S ribosomal protein S4 (Carabus granulatus OX%3D118799)
ANN09658	1.14599	0.00060687	84.899	107.126	128.128	268.134	182.72	255.213	up	Similar to DENND2C: DENN domain-containing protein 2C (Homo sapiens OX%3D9606)		ANN09580	1.59183	9.74897e-06	51.4055	63.4641	52.6017	204.011	114.723	186.603	up	Similar to METTL17: Methyltransferase-like protein 17%2C mitochondrial (Bos taurus OX%3D9913)
ANN09661	1.2514	0.000121562	137.961	82.4043	98.7975	250.479	227.902	283.57	up	Similar to Eefsec: Selenocysteine-specific elongation factor (Mus musculus OX%3D10090)		ANN09594	2.58795	2.98344e-11	51.4055	31.7321	30.6843	282.109	265.674	140.971	up	Similar to Creg1: Protein CREG1 (Mus musculus OX%3D10090)
ANN09665	2.47293	1.12673e-18	3145.12	4246.91	4862.69	29638.2	17648.1	20738.7	up	Similar to RpL28: 60S ribosomal protein L28 (Drosophila melanogaster OX%3D7227)		ANN09613	5.0654	0.000152635	0	22.8471	8.76694	342.675	470.297	242.013	up	Similar to RD19D: Probable cysteine protease RD19D (Arabidopsis thaliana OX%3D3702)
ANN09671	1.48488	3.01996e-10	301.97	337.858	392.102	971.021	883.701	1028.14	up	Similar to TfIIA-L: Transcription initiation factor IIA subunit 1 (Drosophila melanogaster OX%3D7227)		ANN09615	2.12415	8.778e-06	37.9954	20.3085	61.3686	261.389	109.356	148.304	up	Similar to PEX10: Peroxisome biogenesis factor 10 (Homo sapiens OX%3D9606)
ANN09677	1.70343	2.62356e-08	82.9695	69.0136	74.0981	209.652	239.862	286.811	up	Similar to Qtrt2: Queuine tRNA-ribosyltransferase accessory subunit 2 (Mus musculus OX%3D10090)		ANN09648	1.42686	0.00287648	23.4677	24.1164	55.524	106.787	81.1782	86.375	up	Similar to valS1: Probable valine--tRNA ligase%2C cytoplasmic (Dictyostelium discoideum OX%3D44689)
ANN09678	1.59527	2.88475e-08	95.5114	115.366	101.885	351.995	263.117	331.372	up	Similar to PINX1: PIN2/TERF1-interacting telomerase inhibitor 1 (Homo sapiens OX%3D9606)		ANN09654	1.72574	0.00211987	30.1728	67.272	35.0678	234.294	54.3425	149.934	up	Similar to bab1: Protein bric-a-brac 1 (Drosophila melanogaster OX%3D7227)
ANN09679	1.53617	1.37383e-07	100.335	117.426	138.934	392.822	289.03	349.196	up	Similar to Rfwd3: E3 ubiquitin-protein ligase RFWD3 (Mus musculus OX%3D10090)		ANN09655	2.75267	4.38665e-09	37.9954	27.9242	26.3008	329.127	95.9379	199.64	up	Protein of unknown function
ANN09680	1.71796	0.000752882	30.8724	14.4207	20.0682	52.9648	86.3768	76.1588	up	Similar to RFWD3: E3 ubiquitin-protein ligase RFWD3 (Ailuropoda melanoleuca OX%3D9646)		ANN09661	1.5506	1.26493e-07	93.8709	67.272	84.7471	286.094	207.977	227.346	up	Similar to Eefsec: Selenocysteine-specific elongation factor (Mus musculus OX%3D10090)
ANN09686	2.6873	5.33303e-10	13.5067	19.571	16.9808	90.4815	116.941	113.428	up	Similar to FAR1: Fatty acyl-CoA reductase 1 (Homo sapiens OX%3D9606)		ANN09662	2.72215	0.00830911	6.70507	5.07713	0	15.1415	46.9626	17.9269	up	Protein of unknown function
ANN09687	1.95063	1.5139e-12	263.38	294.595	169.808	904.815	1022.57	896.891	up	Similar to UTP20: Small subunit processome component 20 homolog (Homo sapiens OX%3D9606)		ANN09665	1.67076	1.65302e-29	6275.94	5343.68	5626.92	18704.5	17323.8	18886	up	Similar to RpL28: 60S ribosomal protein L28 (Drosophila melanogaster OX%3D7227)
ANN09688	2.08092	8.08978e-09	53.0619	50.4726	43.2239	143.446	255.808	222.805	up	Similar to Utp20: Small subunit processome component 20 homolog (Mus musculus OX%3D10090)		ANN09671	1.34871	1.91572e-08	289.435	244.971	302.46	863.063	548.121	720.335	up	Similar to TfIIA-L: Transcription initiation factor IIA subunit 1 (Drosophila melanogaster OX%3D7227)
ANN09692	2.34865	0.0481645	5.78857	0	3.08742	23.1721	11.2954	11.3428	up	Protein of unknown function		ANN09677	2.55452	1.31235e-13	43.5829	44.4249	42.3736	352.238	226.762	187.418	up	Similar to Qtrt2: Queuine tRNA-ribosyltransferase accessory subunit 2 (Mus musculus OX%3D10090)
ANN09693	3.06177	6.79075e-07	19.2952	4.12021	6.17484	66.206	68.437	119.099	up	Protein of unknown function		ANN09678	2.40943	6.79032e-09	46.9355	52.0406	30.6843	340.284	129.483	222.456	up	Similar to PINX1: PIN2/TERF1-interacting telomerase inhibitor 1 (Homo sapiens OX%3D9606)
ANN09700	2.77488	2.57547e-23	54.0267	62.8333	61.7484	450.201	399.991	370.261	up	Similar to Recql4: ATP-dependent DNA helicase Q4 (Mus musculus OX%3D10090)		ANN09679	1.4463	5.79575e-07	89.4009	120.582	89.1306	329.127	227.433	259.125	up	Similar to Rfwd3: E3 ubiquitin-protein ligase RFWD3 (Mus musculus OX%3D10090)
ANN09714	2.21287	7.70722e-06	18.3305	42.2322	77.1855	241.652	135.545	251.162	up	Similar to PINX1: PIN2/TERF1-interacting telomerase inhibitor 1 (Homo sapiens OX%3D9606)		ANN09680	2.69155	0.0012398	1.11751	5.07713	13.1504	58.175	26.8358	35.8538	up	Similar to RFWD3: E3 ubiquitin-protein ligase RFWD3 (Ailuropoda melanoleuca OX%3D9646)
ANN09715	1.4089	6.99782e-07	253.732	358.459	373.578	1022.88	687.028	904.993	up	Similar to Psma5: Proteasome subunit alpha type-5 (Mus musculus OX%3D10090)		ANN09686	2.42474	2.20934e-07	26.8203	55.8484	11.6893	163.368	197.914	148.304	up	Similar to FAR1: Fatty acyl-CoA reductase 1 (Homo sapiens OX%3D9606)
ANN09716	1.3647	1.67351e-07	223.825	275.024	267.062	760.265	546.832	665.174	up	Similar to PSMB6: Proteasome subunit beta type-6 (Bos taurus OX%3D9913)		ANN09687	1.90417	3.11772e-22	215.68	276.704	268.853	874.22	983.531	986.794	up	Similar to UTP20: Small subunit processome component 20 homolog (Homo sapiens OX%3D9606)
ANN09717	1.38449	6.36755e-07	301.006	320.347	378.209	1048.26	650.484	909.044	up	Similar to qtrt2: Queuine tRNA-ribosyltransferase accessory subunit 2 (Xenopus laevis OX%3D8355)		ANN09688	2.18203	1.66131e-10	36.8779	72.3491	64.2909	197.636	282.447	303.127	up	Similar to Utp20: Small subunit processome component 20 homolog (Mus musculus OX%3D10090)
ANN09726	1.25589	0.000345683	124.454	93.7349	69.467	272.548	185.378	234.958	up	Similar to Rpusd3: Mitochondrial mRNA pseudouridine synthase Rpusd3 (Mus musculus OX%3D10090)		ANN09693	1.711	1.12219e-05	24.5852	35.5399	43.8347	105.193	109.356	123.044	up	Protein of unknown function
ANN09748	1.74944	0.0150197	5.78857	16.4809	6.17484	29.7927	29.8997	37.2692	up	Similar to Cyp12d1-p: Probable cytochrome P450 12d1 proximal%2C mitochondrial (Drosophila melanogaster OX%3D7227)		ANN09700	2.71002	7.83942e-25	53.6405	60.9256	43.8347	349.05	340.814	350.389	up	Similar to Recql4: ATP-dependent DNA helicase Q4 (Mus musculus OX%3D10090)
ANN09757	1.19197	0.0104942	33.7667	41.2021	46.3113	62.8957	129.565	81.8302	up	Similar to Larp4B: La-related protein Larp4B (Drosophila melanogaster OX%3D7227)		ANN09714	1.3161	0.000249894	61.4631	71.0798	67.2132	116.35	218.712	161.342	up	Similar to PINX1: PIN2/TERF1-interacting telomerase inhibitor 1 (Homo sapiens OX%3D9606)
ANN09758	1.53415	0.000361999	43.4143	29.8715	33.9616	71.7231	123.585	115.048	up	Protein of unknown function		ANN09723	2.03891	0.00712287	27.9378	7.61569	2.92231	73.3165	47.6335	40.7429	up	Protein of unknown function
ANN09766	3.48131	9.27074e-20	26.0486	18.541	50.9424	403.856	342.185	291.672	up	Similar to Os05g0539400: Beta-galactosidase 8 (Oryza sativa subsp. japonica OX%3D39947)		ANN09742	1.10227	0.00548531	145.276	87.5805	134.426	386.505	154.306	248.532	up	Similar to Tsc1: Hamartin (Mus musculus OX%3D10090)
ANN09770	2.74373	8.68178e-11	21.2248	49.4426	20.0682	162.205	241.855	209.842	up	Protein of unknown function		ANN09757	1.65752	6.55907e-05	25.7028	30.4628	29.2231	105.193	87.8872	75.7819	up	Similar to Larp4B: La-related protein Larp4B (Drosophila melanogaster OX%3D7227)
ANN09771	1.40803	6.29055e-06	217.071	264.724	169.808	415.994	678.39	637.627	up	Similar to AAEL005527: Exonuclease mut-7 homolog (Aedes aegypti OX%3D7159)		ANN09759	1.34126	0.0205536	12.2926	22.8471	29.2231	38.2521	56.3551	66.8184	up	Similar to Tf2-6: Transposon Tf2-6 polyprotein (Schizosaccharomyces pombe (strain 972 / ATCC 24843) OX%3D284812)
ANN09777	1.41054	4.53688e-05	59.8152	54.5928	74.0981	163.308	138.203	196.878	up	Protein of unknown function		ANN09760	1.80312	0.00150196	21.2327	15.2314	11.6893	38.2521	72.4566	58.6698	up	Protein of unknown function
ANN09791	7.50079	2.48634e-129	65.6038	39.142	32.4179	10508	7661.63	7056.84	up	Similar to SETMAR: Histone-lysine N-methyltransferase SETMAR (Homo sapiens OX%3D9606)		ANN09765	1.03369	0.000143303	96.1059	107.889	102.281	221.543	187.85	217.567	up	Similar to rnf41: E3 ubiquitin-protein ligase NRDP1 (Xenopus laevis OX%3D8355)
ANN09799	2.29309	3.9382e-15	117.701	84.4644	111.147	429.235	475.073	628.715	up	Similar to SUMO3: Small ubiquitin-related modifier 3 (Bos taurus OX%3D9913)		ANN09766	1.59576	1.92691e-06	128.514	63.4641	122.737	251.029	305.257	395.207	up	Similar to Os05g0539400: Beta-galactosidase 8 (Oryza sativa subsp. japonica OX%3D39947)
ANN09810	2.05095	1.80014e-05	27.0133	13.3907	26.2431	119.171	71.0948	85.071	up	Protein of unknown function		ANN09769	5.0043	0.0178043	0	0	0	12.7507	7.37984	2.44458	up	Protein of unknown function
ANN09811	3.58615	1.95333e-31	52.0971	55.6229	80.2729	929.09	584.04	721.888	up	Similar to Dpit47: DNA polymerase interacting tetratricopeptide repeat-containing%2C protein of 47 kDa (Drosophila melanogaster OX%3D7227)		ANN09770	2.60123	1.66169e-15	37.9954	50.7713	33.6066	192.854	288.485	262.385	up	Protein of unknown function
ANN09812	1.41373	0.000474483	43.4143	62.8333	40.1365	162.205	95.679	135.303	up	Similar to SAPCD2: Suppressor APC domain-containing protein 2 (Homo sapiens OX%3D9606)		ANN09771	1.07642	1.56276e-07	243.617	238.625	214.79	516.403	493.778	461.21	up	Similar to AAEL005527: Exonuclease mut-7 homolog (Aedes aegypti OX%3D7159)
ANN09836	1.32745	0.00408526	37.6257	32.9617	60.2047	154.481	83.0546	88.3117	up	Similar to TfIIFalpha: General transcription factor IIF subunit 1 (Drosophila melanogaster OX%3D7227)		ANN09785	1.9922	0.0138907	20.1152	22.8471	8.76694	14.3445	50.988	141.785	up	Protein of unknown function
ANN09843	1.37187	8.07873e-05	67.5333	64.8934	84.9041	223.997	140.861	196.068	up	Similar to SAT2: Diamine acetyltransferase 2 (Bos taurus OX%3D9913)		ANN09791	7.6593	2.53048e-118	37.9954	25.3856	13.1504	7342.81	3987.8	4463.8	up	Similar to SETMAR: Histone-lysine N-methyltransferase SETMAR (Homo sapiens OX%3D9606)
ANN09853	1.58807	9.91238e-05	111.912	285.325	307.198	908.125	491.684	713.786	up	Similar to Eif4e2: Eukaryotic translation initiation factor 4E type 2 (Mus musculus OX%3D10090)		ANN09799	1.75486	6.28109e-13	120.691	115.505	157.805	498.074	389.79	438.394	up	Similar to SUMO3: Small ubiquitin-related modifier 3 (Bos taurus OX%3D9913)
ANN09854	1.07862	0.0250838	56.921	32.9617	24.6994	84.9643	89.699	70.4874	up	Similar to Taf4: Transcription initiation factor TFIID subunit 4 (Drosophila melanogaster OX%3D7227)		ANN09801	4.34794	0.000268117	0	1.26928	2.92231	15.9384	30.1903	33.4092	up	Similar to CG1139: Proton-coupled amino acid transporter-like protein CG1139 (Drosophila melanogaster OX%3D7227)
ANN09867	3.91987	6.91476e-47	63.6743	57.683	43.2239	920.263	752.807	846.659	up	Similar to AURKB: Aurora kinase B (Sus scrofa OX%3D9823)		ANN09805	1.3733	1.6543e-05	120.691	107.889	58.4463	255.811	247.56	244.458	up	Similar to Rbsn: Rabenosyn-5 (Mus musculus OX%3D10090)
ANN09868	3.84546	7.50932e-19	9.64762	11.3306	24.6994	240.548	163.452	224.425	up	Similar to gxcJJ: Rac guanine nucleotide exchange factor JJ (Dictyostelium discoideum OX%3D44689)		ANN09810	1.63709	0.0154379	62.5806	29.1935	5.84463	72.5196	150.28	83.9305	up	Protein of unknown function
ANN09878	1.80499	2.23194e-11	152.432	123.606	104.972	425.925	471.75	439.938	up	Similar to SETMAR: Histone-lysine N-methyltransferase SETMAR (Homo sapiens OX%3D9606)		ANN09811	3.39384	1.35749e-48	71.5207	87.5805	59.9074	701.288	826.542	780.635	up	Similar to Dpit47: DNA polymerase interacting tetratricopeptide repeat-containing%2C protein of 47 kDa (Drosophila melanogaster OX%3D7227)
ANN09879	1.29816	0.00440388	33.7667	29.8715	30.8742	102.619	71.0948	59.9548	up	Similar to ago: F-box/WD repeat-containing protein 7 (Drosophila melanogaster OX%3D7227)		ANN09821	1.38577	0.0136924	14.5276	43.1556	58.4463	61.3627	126.799	112.451	up	Similar to GLIS3: Zinc finger protein GLIS3 (Homo sapiens OX%3D9606)
ANN09880	1.12818	0.0165886	36.661	44.2923	47.855	54.0682	107.639	117.479	up	Protein of unknown function		ANN09836	1.1573	0.00398416	36.8779	35.5399	54.0628	98.021	82.52	100.228	up	Similar to TfIIFalpha: General transcription factor IIF subunit 1 (Drosophila melanogaster OX%3D7227)
ANN09881	1.33821	3.16871e-06	110.948	121.546	149.74	357.512	279.064	326.51	up	Similar to asnsd1: Asparagine synthetase domain-containing protein 1 (Danio rerio OX%3D7955)		ANN09843	1.66765	6.63333e-07	54.758	74.8877	58.4463	254.217	153.635	189.862	up	Similar to SAT2: Diamine acetyltransferase 2 (Bos taurus OX%3D9913)
ANN09883	2.91055	1.31185e-21	76.2162	81.3742	41.6802	534.062	489.026	495.842	up	Similar to Fanci: Fanconi anemia group I protein homolog (Mus musculus OX%3D10090)		ANN09853	1.51345	2.77962e-11	245.852	209.432	168.033	659.848	564.222	560.623	up	Similar to Eif4e2: Eukaryotic translation initiation factor 4E type 2 (Mus musculus OX%3D10090)
ANN09884	2.29473	4.03751e-11	60.78	43.2622	92.6226	328.823	265.775	358.918	up	Similar to ndc80: Kinetochore protein NDC80 homolog (Xenopus laevis OX%3D8355)		ANN09867	4.17281	5.51157e-40	25.7028	54.5791	33.6066	866.25	553.488	628.256	up	Similar to AURKB: Aurora kinase B (Sus scrofa OX%3D9823)
ANN09892	3.36562	4.65595e-11	6.75333	18.541	6.17484	123.584	93.6856	115.048	up	Similar to Ndc80: Kinetochore protein NDC80 homolog (Mus musculus OX%3D10090)		ANN09868	4.16651	3.05758e-17	29.0553	5.07713	5.84463	266.968	203.952	271.348	up	Similar to gxcJJ: Rac guanine nucleotide exchange factor JJ (Dictyostelium discoideum OX%3D44689)
ANN09903	8.57686	5.59992e-107	7.7181	10.3005	6.17484	3558.57	2875.68	3013.94	up	Protein of unknown function		ANN09873	1.01439	1.1206e-07	801.255	757.762	588.846	1489.44	1365.27	1488.75	up	Similar to Adck5: Uncharacterized aarF domain-containing protein kinase 5 (Mus musculus OX%3D10090)
ANN09904	4.88844	2.23655e-19	7.7181	4.12021	4.63113	223.997	127.572	147.456	up	Similar to NUDT1: 7%2C8-dihydro-8-oxoguanine triphosphatase (Canis lupus familiaris OX%3D9615)		ANN09878	1.08626	7.24264e-05	160.922	138.352	99.3587	293.266	285.13	271.348	up	Similar to SETMAR: Histone-lysine N-methyltransferase SETMAR (Homo sapiens OX%3D9606)
ANN09909	1.95854	8.58802e-09	51.1324	63.8633	98.7975	315.582	256.473	249.541	up	Similar to gdl: Gonadal protein gdl (Drosophila melanogaster OX%3D7227)		ANN09879	1.42341	0.00139027	25.7028	25.3856	27.762	78.8949	62.3932	70.0779	up	Similar to ago: F-box/WD repeat-containing protein 7 (Drosophila melanogaster OX%3D7227)
ANN09910	1.00811	0.000357117	137.961	190.56	171.352	363.029	308.299	333.802	up	Similar to GOLT1A: Vesicle transport protein GOT1A (Bos taurus OX%3D9913)		ANN09883	2.43124	4.17716e-23	69.2857	97.7347	87.6694	503.652	432.727	433.505	up	Similar to Fanci: Fanconi anemia group I protein homolog (Mus musculus OX%3D10090)
ANN09916	1.91634	1.32241e-07	31.8371	36.0519	50.9424	158.894	134.216	149.887	up	Similar to ERCC1: DNA excision repair protein ERCC-1 (Bos taurus OX%3D9913)		ANN09884	2.15397	8.28532e-09	50.288	88.8498	39.4512	347.456	195.23	254.236	up	Similar to ndc80: Kinetochore protein NDC80 homolog (Xenopus laevis OX%3D8355)
ANN09918	1.1064	0.000852129	152.432	199.83	225.382	510.889	289.03	442.369	up	Similar to Kin: DNA/RNA-binding protein KIN17 (Mus musculus OX%3D10090)		ANN09892	2.09002	4.46094e-08	45.8179	29.1935	23.3785	123.522	148.939	150.749	up	Similar to Ndc80: Kinetochore protein NDC80 homolog (Mus musculus OX%3D10090)
ANN09961	1.30053	0.00736513	157.256	128.757	35.5053	313.375	249.828	235.768	up	Similar to ctl-1: Catalase-2 (Caenorhabditis elegans OX%3D6239)		ANN09903	8.33616	3.68933e-111	11.1751	10.1543	2.92231	2901.58	2674.86	2571.69	up	Protein of unknown function
ANN09971	1.25309	0.000155717	91.6524	129.787	87.9915	304.547	222.586	213.893	up	Similar to DPM3: Dolichol-phosphate mannosyltransferase subunit 3 (Bos taurus OX%3D9913)		ANN09904	2.81016	1.2501e-07	15.6452	10.1543	14.6116	144.242	66.4186	73.3373	up	Similar to NUDT1: 7%2C8-dihydro-8-oxoguanine triphosphatase (Canis lupus familiaris OX%3D9615)
ANN09975	1.3665	2.02991e-06	210.318	151.418	142.021	498.752	408.629	396.998	up	Protein of unknown function		ANN09909	1.53425	5.45225e-06	50.288	59.6563	78.9025	195.245	141.559	207.789	up	Similar to gdl: Gonadal protein gdl (Drosophila melanogaster OX%3D7227)
ANN09976	1.18377	0.00539691	65.6038	43.2622	43.2239	150.067	84.3835	114.238	up	Protein of unknown function		ANN09916	1.49544	0.00192792	17.8802	35.5399	59.9074	118.741	90.5708	106.747	up	Similar to ERCC1: DNA excision repair protein ERCC-1 (Bos taurus OX%3D9913)
ANN09988	2.16992	0.000198565	14.4714	11.3306	10.806	81.654	47.175	38.0794	up	Similar to Adcy2: Adenylate cyclase type 2 (Rattus norvegicus OX%3D10116)		ANN09918	1.02829	0.000242279	127.396	204.354	143.193	288.484	313.979	365.872	up	Similar to Kin: DNA/RNA-binding protein KIN17 (Mus musculus OX%3D10090)
ANN09996	5.24109	5.87102e-08	3.85905	0	0	75.0334	47.8395	43.7508	up	Similar to asp: Protein abnormal spindle (Drosophila melanogaster OX%3D7227)		ANN09934	1.53573	0.0166246	26.8203	16.5007	29.2231	108.381	25.494	76.5967	up	Similar to Manf: Mesencephalic astrocyte-derived neurotrophic factor homolog (Drosophila simulans OX%3D7240)
ANN10006	1.13964	2.18746e-05	207.424	233.822	223.838	559.44	396.669	510.426	up	Similar to Tf2-9: Transposon Tf2-9 polyprotein (Schizosaccharomyces pombe (strain 972 / ATCC 24843) OX%3D284812)		ANN09956	2.99573	0.0271331	0	7.61569	0	37.4552	12.0761	11.408	up	Protein of unknown function
ANN10008	1.93164	9.58264e-13	213.212	159.658	222.294	732.679	637.86	896.081	up	Protein of unknown function		ANN09961	1.38981	0.0147709	91.6359	25.3856	75.9802	288.484	85.2036	132.822	up	Similar to ctl-1: Catalase-2 (Caenorhabditis elegans OX%3D6239)
ANN10017	1.53272	0.000587575	26.0486	56.6529	41.6802	113.654	91.0279	154.748	up	Protein of unknown function		ANN09963	1.55086	5.31193e-07	53.6405	50.7713	56.9851	148.227	164.369	159.712	up	Similar to Elp2: Probable elongator complex protein 2 (Drosophila melanogaster OX%3D7227)
ANN10019	1.28335	0.000497824	49.2029	84.4644	75.6418	167.722	140.196	200.119	up	Similar to Aktip: AKT-interacting protein (Rattus norvegicus OX%3D10116)		ANN09970	1.18603	0.00137086	82.6958	50.7713	109.587	219.949	147.597	184.158	up	Similar to Nelf-E: Negative elongation factor E (Drosophila melanogaster OX%3D7227)
ANN10021	3.66552	1.64273e-11	10.6124	11.3306	6.17484	175.446	67.1082	123.961	up	Protein of unknown function		ANN09975	1.29188	1.07856e-05	168.744	110.428	102.281	368.176	280.434	289.275	up	Protein of unknown function
ANN10023	1.98693	3.21665e-11	122.525	167.899	211.488	788.955	544.174	648.16	up	Similar to Rpb10: DNA-directed RNA polymerases I%2C II%2C and III subunit RPABC5 (Drosophila melanogaster OX%3D7227)		ANN09976	1.0282	0.016203	46.9355	40.617	45.2959	120.335	71.1148	79.8562	up	Protein of unknown function
ANN10032	1.70473	0.0320137	13.5067	14.4207	6.17484	11.0343	47.8395	53.4732	up	Protein of unknown function		ANN09983	1.50266	0.0120817	20.1152	20.3085	14.6116	79.6918	35.5574	41.5578	up	Similar to DPM3: Dolichol-phosphate mannosyltransferase subunit 3 (Bos taurus OX%3D9913)
ANN10036	4.55127	5.7397e-67	69.4629	99.9152	84.9041	2311.69	1966.07	1679.54	up	Similar to Hexb: Beta-hexosaminidase subunit beta (Mus musculus OX%3D10090)		ANN09988	1.85556	0.0106307	13.4101	12.6928	2.92231	31.8767	33.5447	41.5578	up	Similar to Adcy2: Adenylate cyclase type 2 (Rattus norvegicus OX%3D10116)
ANN10055	1.3426	3.4405e-06	524.83	688.076	682.32	2043.56	1156.12	1606.63	up	Similar to EDF1: Endothelial differentiation-related factor 1 homolog (Gallus gallus OX%3D9031)		ANN09991	5.52337	0.00235267	0	0	0	10.3599	7.37984	14.6675	up	Protein of unknown function
ANN10062	1.38147	0.000123346	68.4981	77.254	129.672	280.272	198.002	233.337	up	Similar to EDF1: Endothelial differentiation-related factor 1 homolog (Gallus gallus OX%3D9031)		ANN09996	2.2313	6.60096e-05	8.94009	17.77	11.6893	56.5812	48.3044	74.967	up	Similar to asp: Protein abnormal spindle (Drosophila melanogaster OX%3D7227)
ANN10069	1.33484	2.01548e-09	310.653	343.008	322.635	833.092	847.822	781.843	up	Similar to mahj: Protein mahjong (Drosophila melanogaster OX%3D7227)		ANN10006	1.30801	3.66023e-06	186.624	176.43	127.121	422.367	305.257	489.73	up	Similar to Tf2-9: Transposon Tf2-9 polyprotein (Schizosaccharomyces pombe (strain 972 / ATCC 24843) OX%3D284812)
ANN10134	2.61674	2.62568e-14	69.4629	92.7048	44.7676	542.889	348.83	391.326	up	Similar to CG1542: Probable rRNA-processing protein EBP2 homolog (Drosophila melanogaster OX%3D7227)		ANN10008	1.69467	6.88443e-11	164.274	133.275	162.188	628.769	397.17	462.84	up	Protein of unknown function
ANN10156	3.31138	5.88896e-11	5.78857	14.4207	21.6119	104.826	179.398	115.048	up	Protein of unknown function		ANN10014	1.4144	0.010107	16.7627	17.77	24.8397	40.6428	48.3044	68.4481	up	Similar to ALDH1: Aldehyde dehydrogenase%2C cytosolic 1 (Macroscelides proboscideus OX%3D29082)
ANN10160	1.97056	1.67102e-17	460.191	399.661	422.977	1784.25	1399.3	1846.44	up	Similar to SNRPA: U1 small nuclear ribonucleoprotein A (Sus scrofa OX%3D9823)		ANN10020	3.16071	0.00521406	2.23502	6.34641	0	7.96918	42.2664	27.7052	up	Similar to SmD1: Probable small nuclear ribonucleoprotein Sm D1 (Drosophila melanogaster OX%3D7227)
ANN10168	1.23064	9.5923e-06	147.609	180.259	169.808	322.202	443.844	399.428	up	Similar to Brca2: Breast cancer type 2 susceptibility protein homolog (Rattus norvegicus OX%3D10116)		ANN10024	5.57611	0.00238195	0	0	0	4.78151	14.0888	14.6675	up	Similar to Tf2-6: Transposon Tf2-6 polyprotein (Schizosaccharomyces pombe (strain 972 / ATCC 24843) OX%3D284812)
ANN10170	1.48127	5.02973e-05	50.1676	39.142	43.2239	107.033	126.908	136.114	up	Similar to CRBN: Protein cereblon (Bos taurus OX%3D9913)		ANN10029	1.09987	0.000370373	80.4608	99.004	96.4364	244.654	172.42	173.565	up	Similar to nudt21: Cleavage and polyadenylation specificity factor subunit 5 (Xenopus laevis OX%3D8355)
ANN10171	1.92528	1.37351e-12	115.771	88.5846	125.041	420.408	392.018	434.267	up	Similar to asf1: Histone chaperone asf1 (Drosophila melanogaster OX%3D7227)		ANN10032	3.07979	0.0137203	0	7.61569	0	17.5322	16.1015	30.9646	up	Protein of unknown function
ANN10172	1.81982	1.51645e-09	107.089	133.907	152.827	358.616	456.468	568.76	up	Similar to med26: Mediator of RNA polymerase II transcription subunit 26 (Xenopus laevis OX%3D8355)		ANN10036	5.65197	7.59183e-55	79.3433	48.2327	37.9901	1365.92	3851.61	3168.17	up	Similar to Hexb: Beta-hexosaminidase subunit beta (Mus musculus OX%3D10090)
ANN10174	2.46673	5.75645e-22	94.5467	97.8551	86.4478	493.234	485.704	566.329	up	Protein of unknown function		ANN10062	1.23331	0.00527937	78.2258	57.1177	49.6793	220.746	89.8999	126.303	up	Similar to EDF1: Endothelial differentiation-related factor 1 homolog (Gallus gallus OX%3D9031)
ANN10180	1.75652	1.59409e-08	71.3924	75.1939	67.9233	283.582	196.673	247.111	up	Similar to Pus3: tRNA pseudouridine(38/39) synthase (Mus musculus OX%3D10090)		ANN10069	1.30369	4.57947e-11	379.954	298.281	382.823	856.687	941.265	820.563	up	Similar to mahj: Protein mahjong (Drosophila melanogaster OX%3D7227)
ANN10181	1.0588	0.000332929	152.432	119.486	108.06	270.341	248.5	276.278	up	Similar to Taf8: Transcription initiation factor TFIID subunit 8 (Drosophila melanogaster OX%3D7227)		ANN10117	3.45522	0.000527727	2.23502	5.07713	0	35.0644	22.8104	24.4458	up	Similar to RTase: Probable RNA-directed DNA polymerase from transposon BS (Drosophila melanogaster OX%3D7227)
ANN10183	1.01626	0.0146001	100.335	54.5928	49.3987	158.894	122.256	136.114	up	Similar to nrm: Nurim homolog (Drosophila melanogaster OX%3D7227)		ANN10134	1.9094	3.10344e-13	120.691	77.4262	112.509	413.601	409.917	343.87	up	Similar to CG1542: Probable rRNA-processing protein EBP2 homolog (Drosophila melanogaster OX%3D7227)
ANN10184	1.00092	0.031345	45.3438	54.5928	30.8742	78.3437	69.1015	116.669	up	Similar to CG5181: SOSS complex subunit B homolog (Drosophila melanogaster OX%3D7227)		ANN10156	4.15254	3.83652e-13	3.35253	3.80785	11.6893	121.132	112.039	88.8196	up	Protein of unknown function
ANN10187	1.48694	8.93729e-06	66.5686	97.8551	104.972	282.479	196.009	273.847	up	Similar to CG5181: SOSS complex subunit B homolog (Drosophila melanogaster OX%3D7227)		ANN10160	1.76666	3.91801e-18	445.887	374.438	330.221	1365.12	1119.05	1437.41	up	Similar to SNRPA: U1 small nuclear ribonucleoprotein A (Sus scrofa OX%3D9823)
ANN10194	1.62152	3.13393e-10	6018.18	7160.93	8068.97	27786.6	18339.8	19250.3	up	Similar to awd: Nucleoside diphosphate kinase (Drosophila melanogaster OX%3D7227)		ANN10167	1.07287	0.000782062	112.869	88.8498	65.7521	206.402	171.078	188.232	up	Similar to MED23: Mediator of RNA polymerase II transcription subunit 23 (Aedes aegypti OX%3D7159)
ANN10196	2.04199	1.99859e-14	5843.56	7416.38	8439.46	37631.5	23121.8	28601.7	up	Similar to rps11: 40S ribosomal protein S11 (Xenopus laevis OX%3D8355)		ANN10168	1.21909	9.23887e-07	164.274	115.505	134.426	321.158	324.713	320.24	up	Similar to Brca2: Breast cancer type 2 susceptibility protein homolog (Rattus norvegicus OX%3D10116)
ANN10198	2.65153	1.24695e-21	196.811	253.393	162.09	1593.36	1154.79	1112.4	up	Similar to NOP58: Nucleolar protein 58 (Homo sapiens OX%3D9606)		ANN10170	1.00464	0.0311353	36.8779	36.8092	52.6017	54.9874	94.5961	102.672	up	Similar to CRBN: Protein cereblon (Bos taurus OX%3D9913)
ANN10199	2.91925	7.39808e-32	152.432	213.221	143.565	1295.43	1285.69	1282.55	up	Similar to NOP58: Nucleolar protein 58 (Homo sapiens OX%3D9606)		ANN10171	1.67813	3.63208e-11	128.514	129.467	111.048	467.791	322.7	392.762	up	Similar to asf1: Histone chaperone asf1 (Drosophila melanogaster OX%3D7227)
ANN10223	2.81186	1.18302e-33	798.823	662.324	839.778	6191.36	4469	5489.91	up	Similar to Uncharacterized protein C12orf31 homolog (Bos taurus OX%3D9913)		ANN10172	1.46498	1.78237e-10	157.569	143.429	124.198	408.022	405.891	362.612	up	Similar to med26: Mediator of RNA polymerase II transcription subunit 26 (Xenopus laevis OX%3D8355)
ANN10232	1.79415	0.000199033	21.2248	17.5109	15.4371	67.3094	66.4437	55.9038	up	Similar to Spata5: ATPase family protein 2 homolog (Mus musculus OX%3D10090)		ANN10174	2.0388	4.81156e-17	101.693	121.851	102.281	514.809	383.752	440.839	up	Protein of unknown function
ANN10237	2.32211	3.15934e-17	138.926	106.095	100.341	669.784	500.986	564.709	up	Similar to THOC3: THO complex subunit 3 (Bos taurus OX%3D9913)		ANN10178	1.03152	9.74425e-05	449.239	361.745	350.678	1063.09	627.957	686.111	up	Similar to se: Pyrimidodiazepine synthase (Drosophila melanogaster OX%3D7227)
ANN10245	1.20666	0.000170585	73.3219	85.4944	66.3795	163.308	166.109	192.017	up	Similar to BLOC1S4: Biogenesis of lysosome-related organelles complex 1 subunit 4 (Homo sapiens OX%3D9606)		ANN10180	1.29298	0.000185778	69.2857	77.4262	115.431	270.155	160.344	209.419	up	Similar to Pus3: tRNA pseudouridine(38/39) synthase (Mus musculus OX%3D10090)
ANN10248	3.06427	1.88237e-18	32.8019	57.683	35.5053	442.477	285.044	332.992	up	Similar to RAD54L: DNA repair and recombination protein RAD54-like (Fragment) (Gallus gallus OX%3D9031)		ANN10181	1.10976	0.00022351	122.926	85.0419	83.286	186.479	226.762	217.567	up	Similar to Taf8: Transcription initiation factor TFIID subunit 8 (Drosophila melanogaster OX%3D7227)
ANN10256	1.0212	0.00834835	40.52	49.4426	58.661	103.723	97.0078	98.8443	up	Similar to PLCG1: 1-phosphatidylinositol 4%2C5-bisphosphate phosphodiesterase gamma-1 (Bos taurus OX%3D9913)		ANN10182	1.16149	1.89628e-05	115.104	149.775	166.572	376.146	273.725	312.906	up	Similar to Gnl1: Guanine nucleotide-binding protein-like 1 (Mus musculus OX%3D10090)
ANN10269	1.27085	0.00114458	44.379	44.2923	33.9616	112.55	93.6856	92.3627	up	Similar to Utp18: U3 small nucleolar RNA-associated protein 18 homolog (Mus musculus OX%3D10090)		ANN10188	1.83057	0.0100921	6.70507	8.88498	11.6893	31.8767	39.5828	24.4458	up	Protein of unknown function
ANN10273	1.32688	0.00732242	30.8724	21.6311	33.9616	49.6545	70.4303	94.7933	up	Protein of unknown function		ANN10189	1.56127	0.0423054	10.0576	3.80785	26.3008	36.6582	32.8738	47.2618	up	Similar to tc1a: Transposable element Tc1 transposase (Caenorhabditis elegans OX%3D6239)
ANN10275	1.79825	0.0187204	5.78857	6.18032	15.4371	17.6549	37.2085	36.459	up	Similar to SPATA5: ATPase family protein 2 homolog (Homo sapiens OX%3D9606)		ANN10194	1.34581	7.62342e-22	8840.63	7940.63	8026.14	20552.5	21211.7	21292.3	up	Similar to awd: Nucleoside diphosphate kinase (Drosophila melanogaster OX%3D7227)
[truncated: 4,280 more rows]
